# Supplementary material for: Biodiversity inventories in high gear: DNA barcoding facilitates a rapid biotic survey of a temperate nature reserve
Source: PubMed Central journal article supplement (PMC4568406; doi:10.3897/bdj.3.e6313), 2015-08-30
Supplement: biodiversity_data_journal-3-e6313-s009.pdf [file biodiversity_data_journal-3-e6313-s009.pdf]

Parameters

Records Included: All records  
 Filter Image by Orientation: None  
 Aspect Ratio: Original

Result Summary

Total Records: 4312

Re-render images:  per row

5000 Records Per Page - Pages: 1

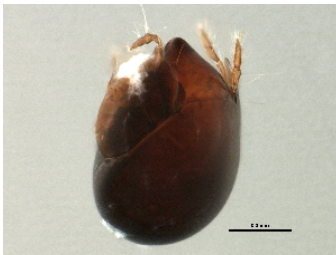

**BIOUG08018-H05 [Dorsal]**  
 Galumnidae  
 Family: Galumnidae  
 BIN URI: BOLD:ACJ0288

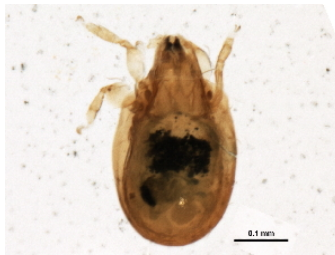

**BIOUG01951-C03 [Dorsal]**  
 Oripodidae  
 Family: Oripodidae  
 BIN URI: BOLD:ABW2696

IMAGE NOT AVAILABLE

**BIOUG24005-F03**  
 Hypochthonius  
 Family: Hypochthoniidae

IMAGE NOT AVAILABLE

**BIOUG24005-H05**  
 Sarcoptiformes

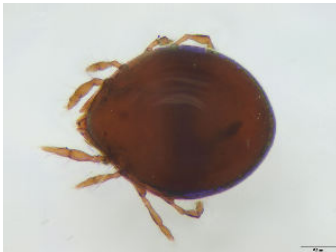

**FINOR-20120134 [Dorsal]**  
 Gustavia microcephala  
 Family: Gustaviidae  
 BIN URI: BOLD:ACE3149

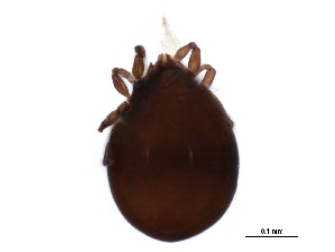

**BIOUG21882-A02 [Lateral]**  
 Gustavia  
 Family: Gustaviidae  
 BIN URI: BOLD:ACV6005

IMAGE NOT AVAILABLE

**BIOUG21899-D07**  
 Sarcoptiformes  
 BIN URI: BOLD:ACV4851

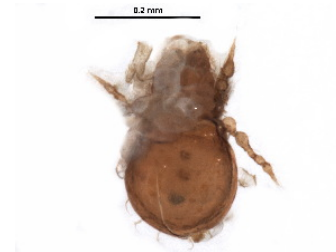

**BIOUG21899-D02 [Dorsal]**  
 Sarcoptiformes  
 BIN URI: BOLD:ACV5637

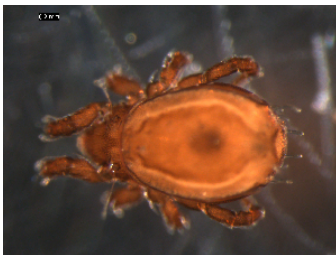

**08DPMIT-0831 [Dorsal]**  
 Nothrus  
 Family: Nothridae  
 BIN URI: BOLD:AAF9189

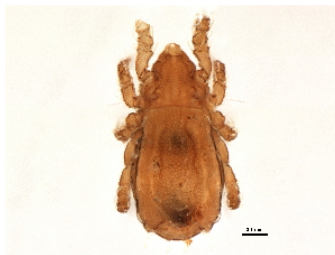

**BIOUG08057-C01 [Dorsal]**  
 Nothrus anauensis  
 Family: Nothridae  
 BIN URI: BOLD:AAI2381

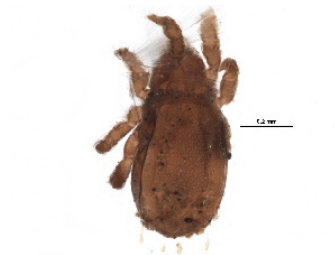

**BIOUG21899-B01 [Dorsal]**  
 Nothrus  
 Family: Nothridae  
 BIN URI: BOLD:ACV6028

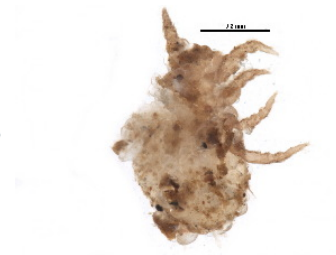

**BIOUG21899-B09 [Dorsal]**  
 Nothrus  
 Family: Nothridae  
 BIN URI: BOLD:ACV4908

IMAGE NOT AVAILABLE

**DPP2.5**

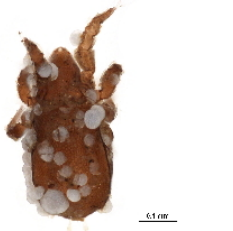

**BIOUG24005-G09**

IMAGE NOT AVAILABLE

IMAGE NOT AVAILABLE

**BIOUG24030-H05**

Nothrus cf. anauensis  
Family: Nothridae  
BIN URI: BOLD:AAO0965

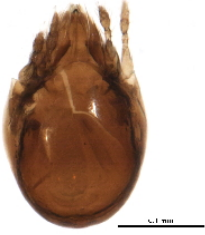

BIOUG21897-B02 [Dorsal]  
Ceratozetidae  
Family: Ceratozetidae  
BIN URI: BOLD:ACV5485

BIOUG21882-B08 [Lateral]  
Nothrus  
Family: Nothridae  
BIN URI: BOLD:ACV6053

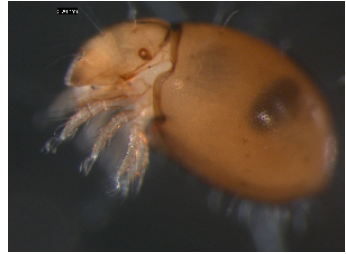

08MIONT-0178 [Dorsal]  
Euphthiracaridae  
Family: Euphthiracaridae  
BIN URI: BOLD:AAF9146

Sarcoptiformes

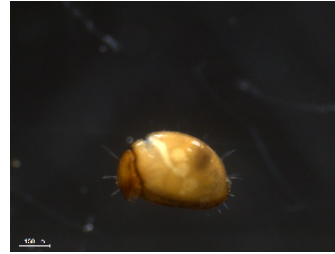

12038-G07 [Lateral]  
Arachnida  
BIN URI: BOLD:AAF9157

Sarcoptiformes

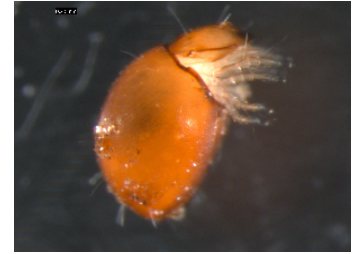

08MIONT-0151 [Dorsal]  
Euphthiracaridae  
Family: Euphthiracaridae  
BIN URI: BOLD:AAF9140

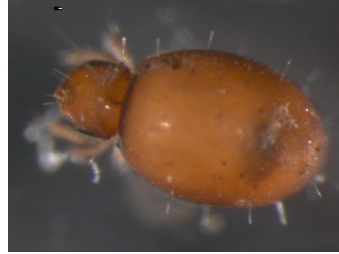

08MIONT-0250 [Dorsal]  
Euphthiracaridae  
Family: Euphthiracaridae  
BIN URI: BOLD:AAM7951

IMAGE NOT AVAILABLE

BIOUG21882-B04  
Euphthiracaridae  
Family: Euphthiracaridae

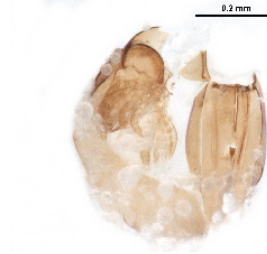

BIOUG21899-A01 [Dorsal]  
Euphthiracaridae  
Family: Euphthiracaridae  
BIN URI: BOLD:ACV5462

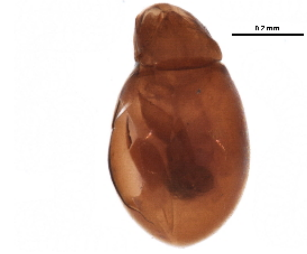

BIOUG24005-B12 [Dorsal]  
Phthiracaridae  
Family: Phthiracaridae

IMAGE NOT AVAILABLE

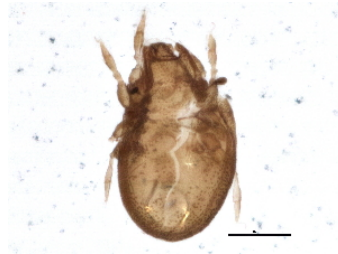

BIOUG06270-B12 [Dorsal]  
Tectocephus sarekensis  
Family: Tectocephidae  
BIN URI: BOLD:AAM3402

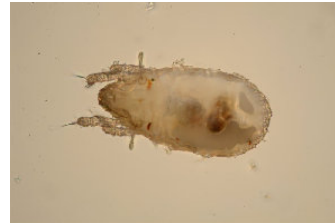

GBOL13631 [Lateral]  
Tectocephus  
Family: Tectocephidae  
BIN URI: BOLD:AAM4355

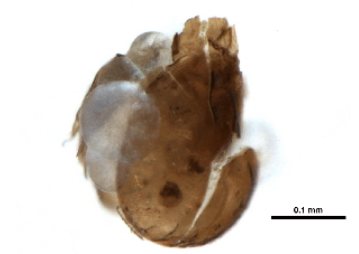

BIOUG12820-D07 [Dorsal]  
Arachnida  
BIN URI: BOLD:ACO1660

BIOUG21899-F06  
Tectocephidae  
Family: Tectocephidae  
BIN URI: BOLD:ACV5626

IMAGE NOT AVAILABLE

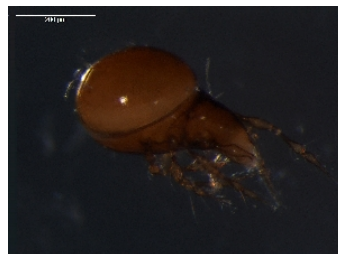

BIOUG21884-C03  
Tectocephidae  
Family: Tectocephidae

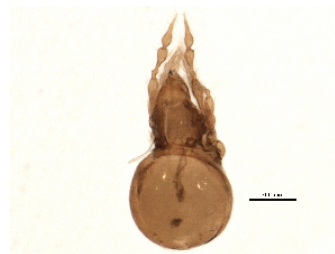

BIOUG15586-F06 [Dorsal]  
Arachnida  
BIN URI: BOLD:AAH6510

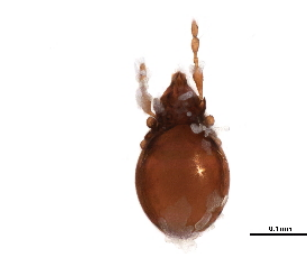

BIOUG20568-F09 [Dorsal]  
Suctobelbidae  
Family: Suctobelbidae  
BIN URI: BOLD:ACV7259

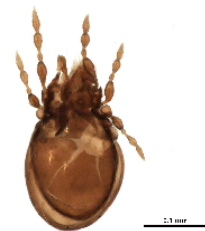

BIOUG20567-C11 [Dorsal]  
Suctobelbidae  
Family: Suctobelbidae  
BIN URI: BOLD:ACV7260

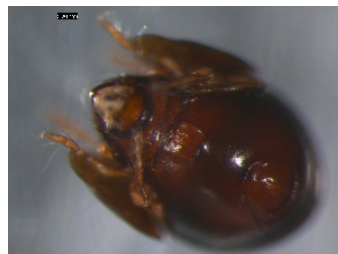

08MIONT-0133 [Ventral]  
Galumnidae  
Family: Galumnidae  
BIN URI: BOLD:AAF9138

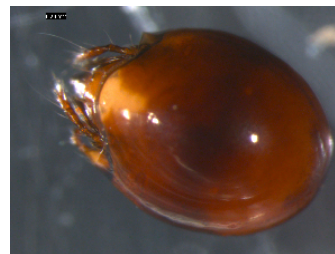

08MIONT-0138 [Dorsal]  
Euzetes globulus  
Family: Euzetidae  
BIN URI: BOLD:AAF9090

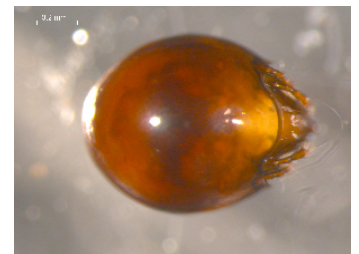

08MIONT-0277 [Dorsal]  
Euzetidae  
Family: Euzetidae  
BIN URI: BOLD:AAH6519

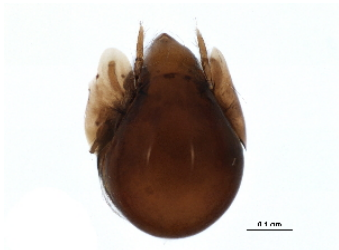

**BIOUG20568-C06 [Dorsal]**  
Galumnidae  
Family: Galumnidae  
BIN URI: BOLD:ACV7095

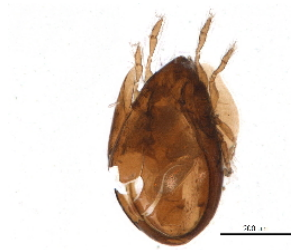

**BIOUG06925-B10 [Dorsal]**  
Sarcoptiformes  
BIN URI: BOLD:ACI5993

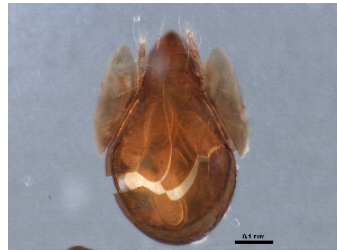

**BIOUG06813-B12 [Dorsal]**  
Parakalummidae  
Family: Parakalummidae  
BIN URI: BOLD:ACI7088

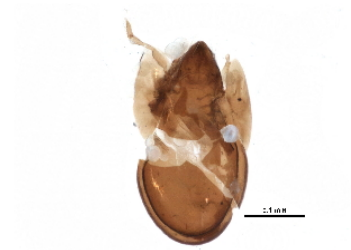

**BIOUG22631-H08 [Dorsal]**  
Parakalummidae  
Family: Parakalummidae  
BIN URI: BOLD:ACV5542

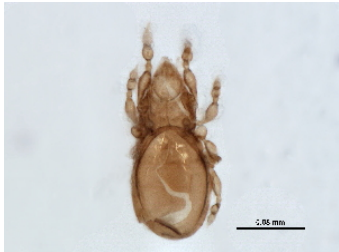

**BIOUG20568-F07 [Dorsal]**  
Oppiidae  
Family: Oppiidae  
BIN URI: BOLD:ACV6645

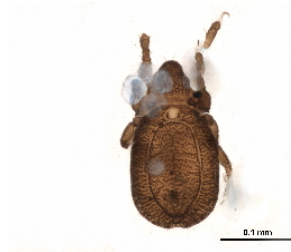

**BIOUG22631-G12 [Dorsal]**  
Cymbaeremaeidae  
Family: Cymbaeremaeidae  
BIN URI: BOLD:ACV5273

**IMAGE NOT AVAILABLE**

**BIOUG20568-F11**  
Sarcoptiformes  
BIN URI: BOLD:ACV6449

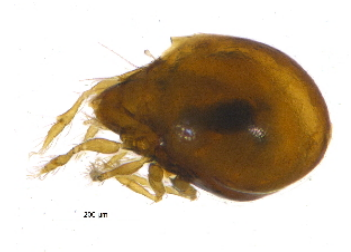

**BIOUG01954-D05 [Lateral]**  
Podoribates pratensis  
Family: Mochlozetidae  
BIN URI: BOLD:AAF9173

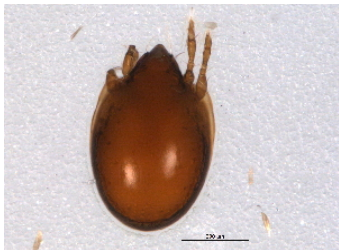

**08DPMIT-0737 [Dorsal]**  
Scheloribates clavilanceolatus  
Family: Scheloribatidae  
BIN URI: BOLD:AAF9097

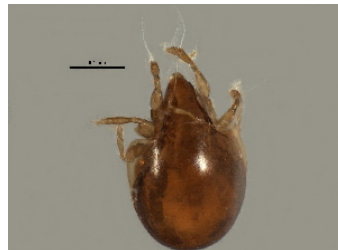

**BIOUG08036-B07 [Dorsal]**  
Scheloribates clavilanceolatus  
Family: Scheloribatidae  
BIN URI: BOLD:AAI0689

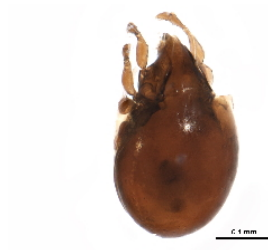

**BIOUG21884-B10 [Dorsal]**  
Scheloribates  
Family: Scheloribatidae  
BIN URI: BOLD:ACV5484

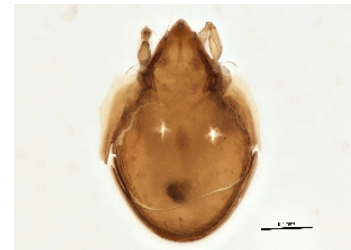

**09DPMIT-0019 [Dorsal]**  
Scheloribates  
Family: Scheloribatidae  
BIN URI: BOLD:AAF9195

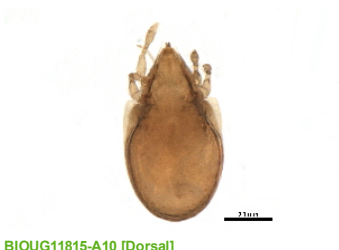

**BIOUG11815-A10 [Dorsal]**  
Scheloribatidae  
Family: Scheloribatidae  
BIN URI: BOLD:ACG4502

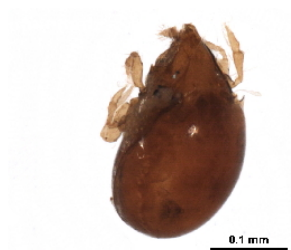

**BIOUG08057-H09 [Dorsal]**  
Scheloribates  
Family: Scheloribatidae  
BIN URI: BOLD:ACI9964

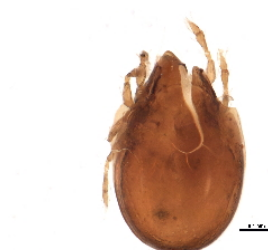

**BIOUG08057-C12 [Dorsal]**  
Scheloribates  
Family: Scheloribatidae  
BIN URI: BOLD:ACV5039

**IMAGE NOT AVAILABLE**

**BIOUG21886-E06**  
Scheloribates  
Family: Scheloribatidae

**IMAGE NOT AVAILABLE**

**BIOUG24030-G04**  
Scheloribatidae  
Family: Scheloribatidae

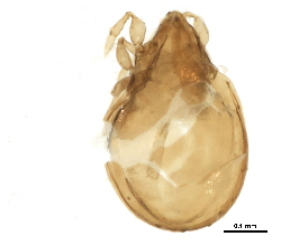

**BIOUG01954-A01 [Dorsal]**  
Scheloribatidae  
Family: Scheloribatidae  
BIN URI: BOLD:AAH6515

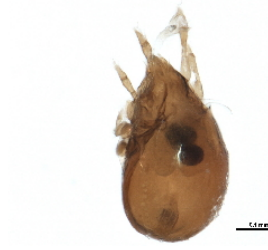

**BIOUG13140-H08 [Dorsal]**  
Arachnida  
BIN URI: BOLD:ACV4431

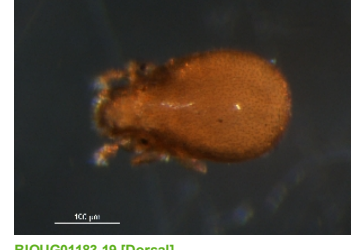

**BIOUG01183-19 [Dorsal]**  
Tectocephus  
Family: Tectocephidae  
BIN URI: BOLD:ACV6209

IMAGE NOT AVAILABLE

BIOUG24005-E08  
Sarcoptiformes

IMAGE NOT AVAILABLE

BIOUG24005-E01  
Sarcoptiformes

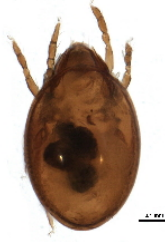

BIOUG10982-E03 [Dorsal]  
Sarcoptiformes  
BIN URI: BOLD:AAF9291

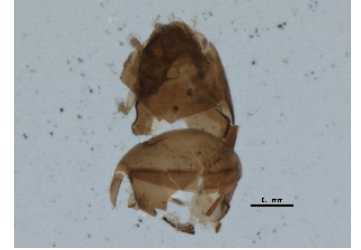

BIOUG10703-E08 [Dorsal]  
Tegoribatidae  
Family: Tegoribatidae  
BIN URI: BOLD:ACL8086

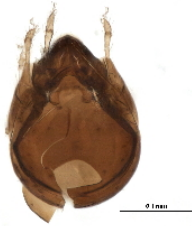

BIOUG11206-G10 [Dorsal]  
Sarcoptiformes  
BIN URI: BOLD:ACL7966

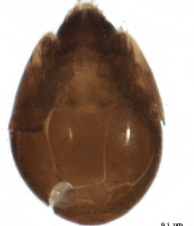

BIOUG13475-A01 [Dorsal]  
Arachnida  
BIN URI: BOLD:ACO1528

IMAGE NOT AVAILABLE

BIOUG21897-F02  
Ceratozetidae  
Family: Ceratozetidae  
BIN URI: BOLD:ACV5233

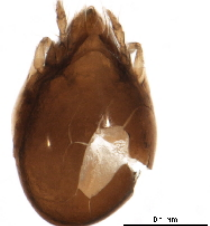

BIOUG21897-B07 [Dorsal]  
Ceratozetidae  
Family: Ceratozetidae  
BIN URI: BOLD:ACV5252

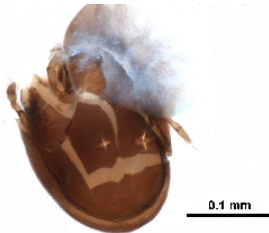

BIOUG20565-E02 [Dorsal]  
Ceratozetidae  
Family: Ceratozetidae  
BIN URI: BOLD:ACV3447

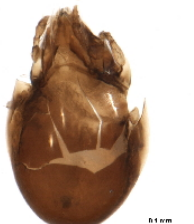

BIOUG21897-B06 [Dorsal]  
Ceratozetidae  
Family: Ceratozetidae  
BIN URI: BOLD:ACV5672

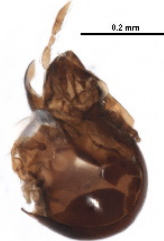

BIOUG22837-A01 [Dorsal]  
Punctoribates punctum  
Family: Mycobatidae  
BIN URI: BOLD:AAH6516

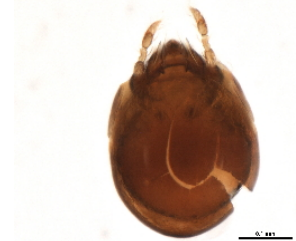

BIOUG12820-D05 [Dorsal]  
Arachnida  
BIN URI: BOLD:ACB6310

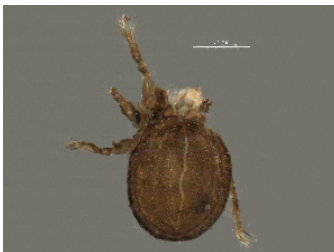

BIOUG09600-F01 [Dorsal]  
Sarcoptiformes  
BIN URI: BOLD:ACL0449

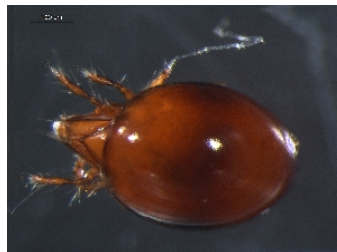

DPMIT-32-56 [Dorsal]  
Dorycranosus acutidens  
Family: Liacaridae  
BIN URI: BOLD:AAF9274

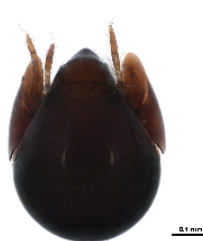

BIOUG20567-F01 [Dorsal]  
Galumnidae  
Family: Galumnidae  
BIN URI: BOLD:ACW0678

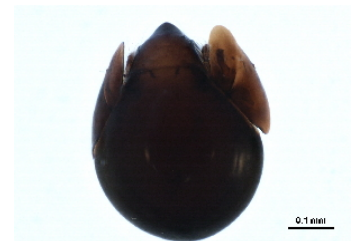

BIOUG20565-A03 [Dorsal]  
Galumnidae  
Family: Galumnidae  
BIN URI: BOLD:ACV4708

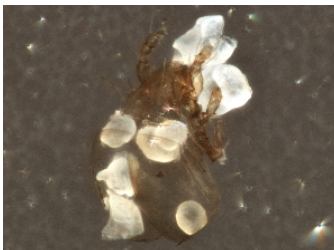

09DPMIT-0010 [Dorsal]  
Galumnidae  
Family: Galumnidae  
BIN URI: BOLD:AAF9192

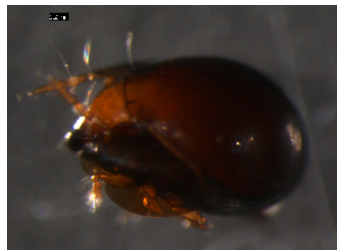

08DPMIT-0900 [Dorsal]  
Galumnidae  
Family: Galumnidae  
BIN URI: BOLD:ACP1171

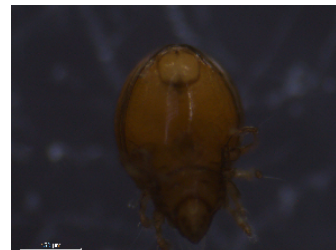

11982-H09 [Ventral]  
Arachnida  
BIN URI: BOLD:AAM4805

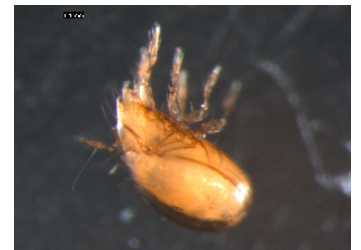

08MIONT-0159 [Dorsal]  
Oribatulidae  
Family: Oribatulidae  
BIN URI: BOLD:ACI4357

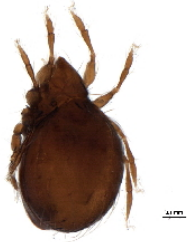

**BIOUG10061-F05 [Dorsal]**  
 Oribatulidae  
 Family: Oribatulidae  
 BIN URI: BOLD:ACT6033

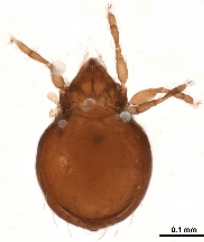

**BIOUG22631-F12 [Dorsal]**  
 Oribatulidae  
 Family: Oribatulidae  
 BIN URI: BOLD:AAL8123

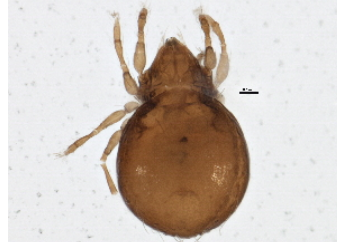

**BIOUG05589-B05 [Dorsal]**  
 Oribatulidae  
 Family: Oribatulidae  
 BIN URI: BOLD:ACF9074

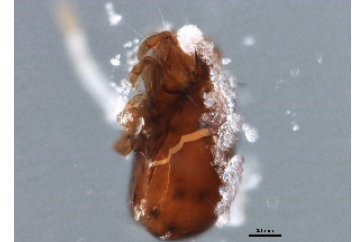

**BIOUG11527-F12 [Dorsal]**  
 Ceratozetidae  
 Family: Ceratozetidae  
 BIN URI: BOLD:ACM4402

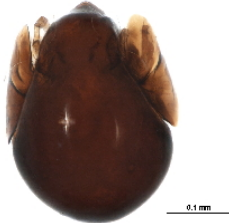

**BIOUG21882-G01 [Lateral]**  
 Galumnidae  
 Family: Galumnidae  
 BIN URI: BOLD:ACV4882

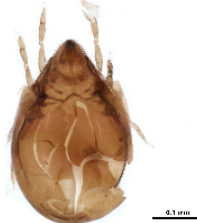

**BIOUG20567-D09 [Dorsal]**  
 Ceratozetidae  
 Family: Ceratozetidae  
 BIN URI: BOLD:ACV6450

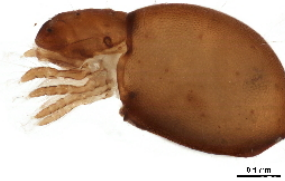

**BIOUG20567-D01 [Lateral]**  
 Ceratozetidae  
 Family: Ceratozetidae  
 BIN URI: BOLD:ACV7094

**IMAGE NOT AVAILABLE**

**BIOUG24030-E10**  
 Sarcoptiformes

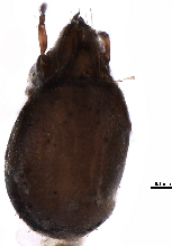

**BIOUG14143-D09 [Dorsal]**  
 Arachnida  
 BIN URI: BOLD:ACP1000

**IMAGE NOT AVAILABLE**

**BIOUG24000-B08**  
 Sarcoptiformes

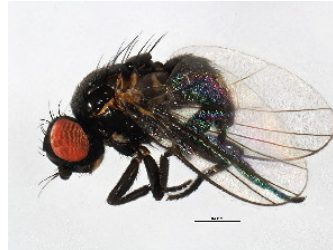

**BIOUG00819-D06 [Lateral]**  
 Agromyzidae  
 Family: Agromyzidae  
 BIN URI: BOLD:AAG6907

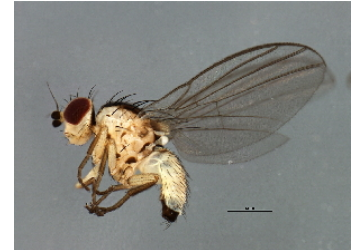

**MTDIC-0260 [Lateral]**  
 Phytoliriomyza dorsata  
 Family: Agromyzidae  
 BIN URI: BOLD:AAG4751

**IMAGE NOT AVAILABLE**

**BIOUG22416-C05**  
 Agromyzidae  
 Family: Agromyzidae

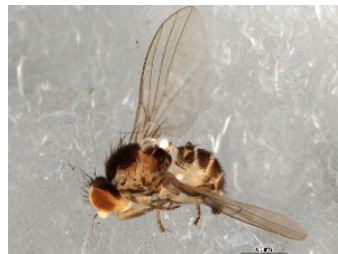

**08TTML-1445 [Lateral]**  
 Agromyzidae  
 Family: Agromyzidae  
 BIN URI: BOLD:AAG4781

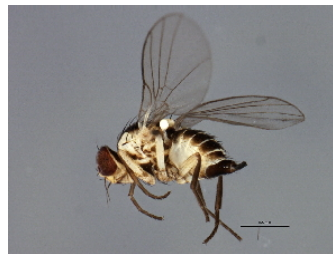

**08TTML-0977 [Lateral]**  
 Liriomyza brassicae  
 Family: Agromyzidae  
 BIN URI: BOLD:AAF6806

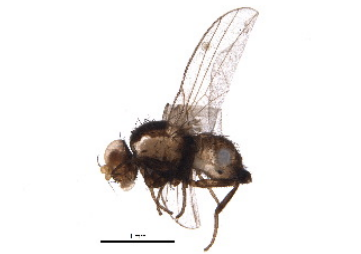

**BIOUG20570-D12 [Lateral]**  
 Agromyzidae  
 Family: Agromyzidae  
 BIN URI: BOLD:ACV5125

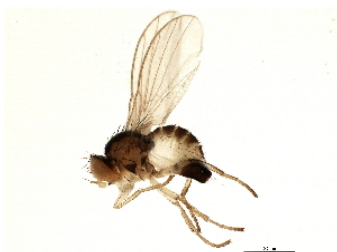

**BIOUG01589-E08 [Lateral]**  
 Liriomyza fricki  
 Family: Agromyzidae  
 BIN URI: BOLD:AAK8756

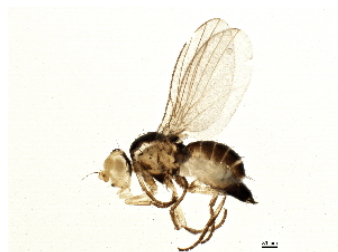

**BIOUG03410-A05 [Lateral]**  
 Liriomyza  
 Family: Agromyzidae  
 BIN URI: BOLD:ACE7414

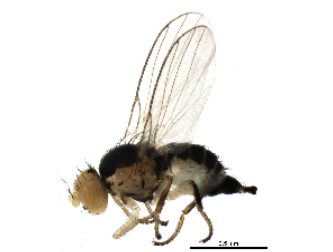

**BIOUG24002-B10 [Lateral]**  
 Agromyzidae  
 Family: Agromyzidae

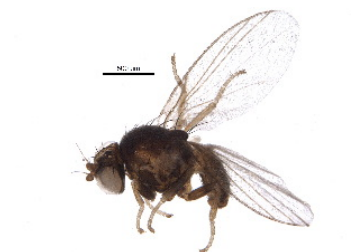

**BIOUG22356-E03 [Lateral]**  
 Agromyzidae  
 Family: Agromyzidae  
 BIN URI: BOLD:AA5429

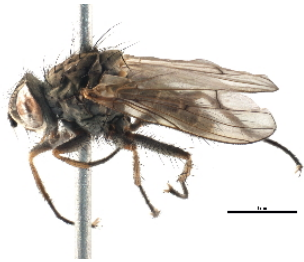

**BIOUG08978-F07 [Lateral]**  
 Anthomyiidae  
 Family: Anthomyiidae  
 BIN URI: BOLD:ACL0478

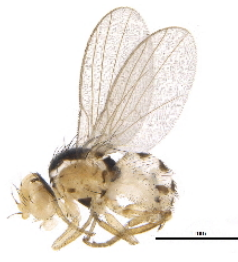

**BIOUG22330-D05 [Lateral]**  
 Agromyzidae  
 Family: Agromyzidae  
 BIN URI: BOLD:AAV4836

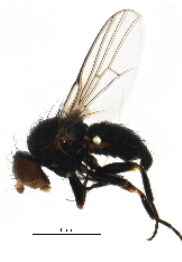

**BIOUG22361-B06 [Lateral]**  
 Agromyzidae  
 Family: Agromyzidae  
 BIN URI: BOLD:ACV2367

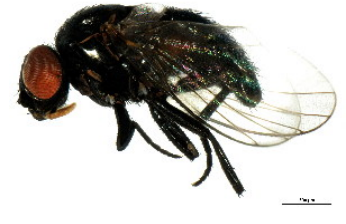

**BIOUG01348-B10 [Lateral]**  
 Ophiomyia nasuta  
 Family: Agromyzidae  
 BIN URI: BOLD:AAK5607

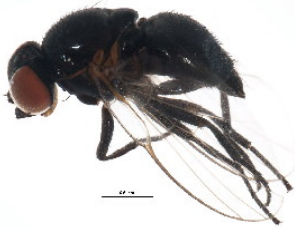

**BIOUG01360-B04 [Lateral]**  
 Agromyzidae  
 Family: Agromyzidae  
 BIN URI: BOLD:AAAN5441

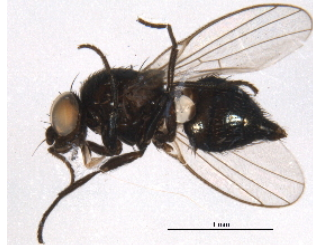

**BIOUG04247-A03 [Lateral]**  
 Agromyzidae  
 Family: Agromyzidae  
 BIN URI: BOLD:AAP6781

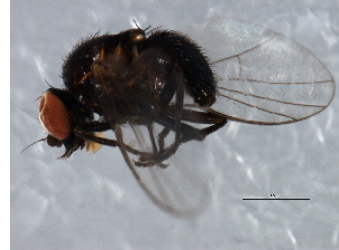

**08TTML-0966 [Lateral]**  
 Ophiomyia  
 Family: Agromyzidae  
 BIN URI: BOLD:AAG6954

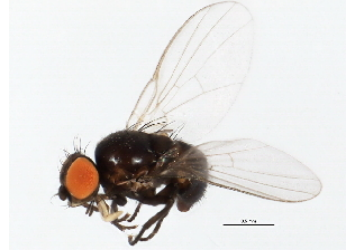

**08TTML-2475 [Lateral]**  
 Ophiomyia quinta  
 Family: Agromyzidae  
 BIN URI: BOLD:AAI3360

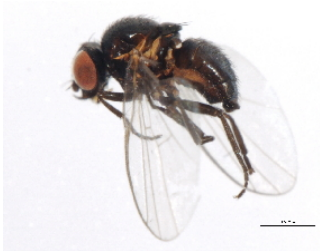

**09BBEDI-0613 [Lateral]**  
 Ophiomyia  
 Family: Agromyzidae  
 BIN URI: BOLD:ABZ1036

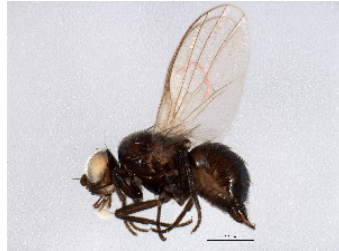

**BIOUG00896-C10 [Lateral]**  
 Agromyzidae  
 Family: Agromyzidae  
 BIN URI: BOLD:AAAN6235

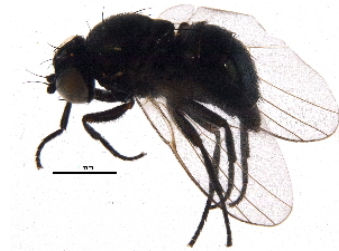

**BIOUG10528-G05 [Lateral]**  
 Ophiomyia  
 Family: Agromyzidae  
 BIN URI: BOLD:ACL6244

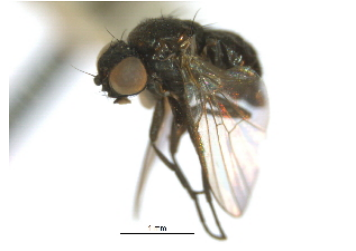

**CCDB-21422-B06 [Lateral]**  
 Ophiomyia labiatarum  
 Family: Agromyzidae  
 BIN URI: BOLD:ACL9630

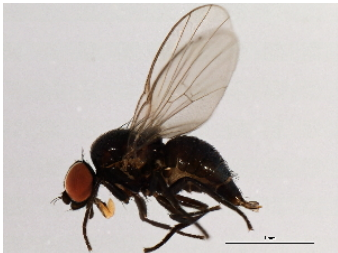

**08TTML-1856 [Lateral]**  
 Agromyzidae  
 Family: Agromyzidae  
 BIN URI: BOLD:AAAN5434

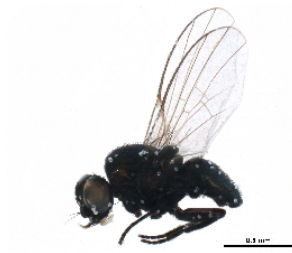

**BIOUG21780-H08 [Lateral]**  
 Diptera  
 BIN URI: BOLD:ACV1282

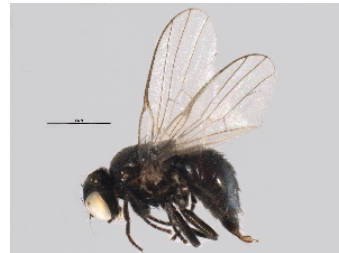

**BIOUG11389-D09 [Lateral]**  
 Agromyzidae  
 Family: Agromyzidae  
 BIN URI: BOLD:ACM7529

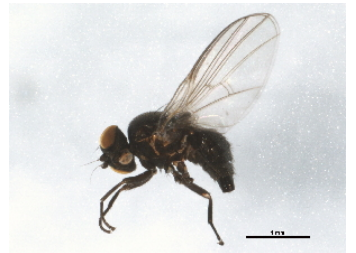

**BIOUG01685-G11 [Lateral]**  
 Agromyzidae  
 Family: Agromyzidae  
 BIN URI: BOLD:ACV3095

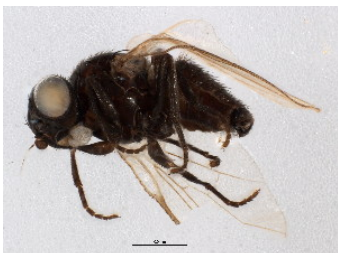

**BIOUG01882-G12 [Lateral]**  
 Agromyzidae  
 Family: Agromyzidae  
 BIN URI: BOLD:AAP8823

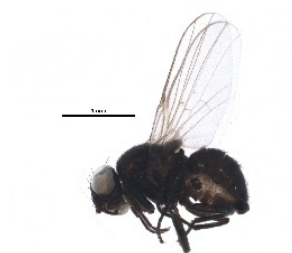

**BIOUG23076-E11 [Lateral]**  
 Ophiomyia similata  
 Family: Agromyzidae  
 BIN URI: BOLD:ACV5944

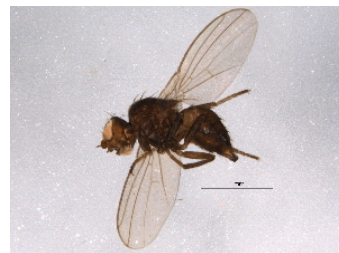

**BIOUG06462-E04 [Lateral]**  
 Agromyza frontella  
 Family: Agromyzidae  
 BIN URI: BOLD:AAJ7105

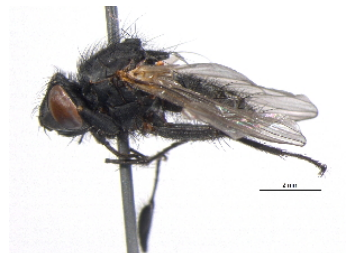

**BIOUG05523-E08 [Lateral]**  
 Anthomyiidae  
 Family: Anthomyiidae  
 BIN URI: BOLD:ABW1310

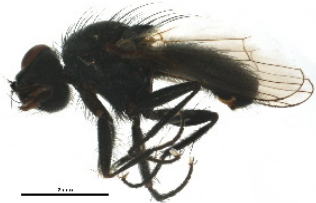

**BIOUG21873-D04 [Lateral]**  
 Anthomyiidae  
 Family: Anthomyiidae  
 BIN URI: BOLD:ACF8096

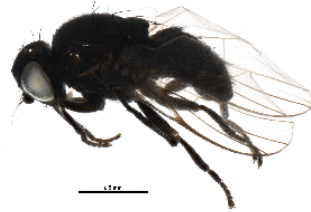

**BIOUG22462-H09 [Lateral]**  
 Hexomyza  
 Family: Agromyzidae  
 BIN URI: BOLD:ACV2366

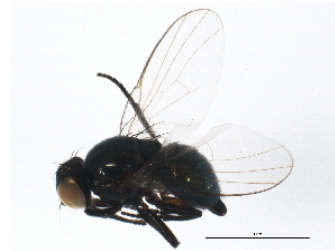

**BIOUG03345-D02 [Lateral]**  
 Agromyzidae  
 Family: Agromyzidae  
 BIN URI: BOLD:ACC8572

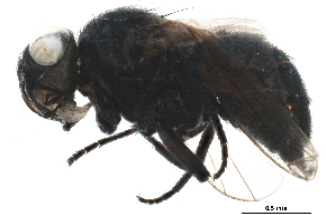

**BIOUG21985-C12 [Lateral]**  
 Agromyzidae  
 Family: Agromyzidae  
 BIN URI: BOLD:ACU4080

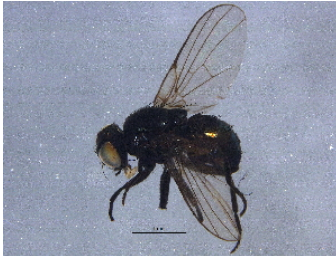

**BIOUG12062-C07 [Lateral]**  
 Agromyzidae  
 Family: Agromyzidae  
 BIN URI: BOLD:ACM8243

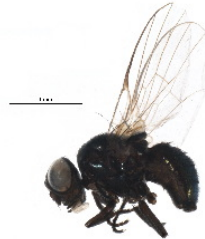

**BIOUG21250-F07 [Lateral]**  
 Diptera  
 BIN URI: BOLD:ACU8028

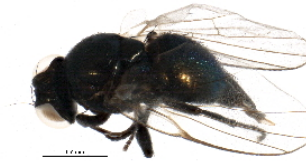

**BIOUG22462-D10 [Lateral]**  
 Agromyzidae  
 Family: Agromyzidae  
 BIN URI: BOLD:ACV3260

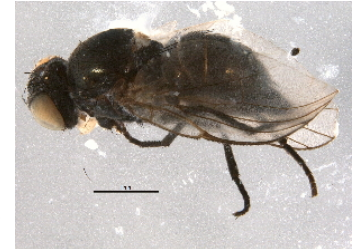

**BIOUG05750-A07 [Lateral]**  
 Agromyzidae  
 Family: Agromyzidae  
 BIN URI: BOLD:ACG3390

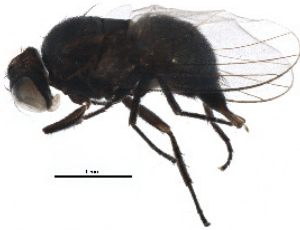

**BIOUG22467-G05 [Lateral]**  
 Melanagomyza  
 Family: Agromyzidae  
 BIN URI: BOLD:ACV3482

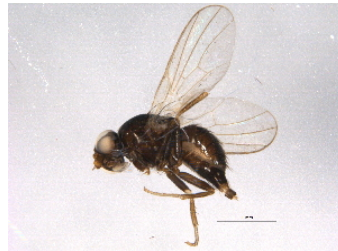

**BIOUG05994-E10 [Lateral]**  
 Agromyzidae  
 Family: Agromyzidae  
 BIN URI: BOLD:ACG5862

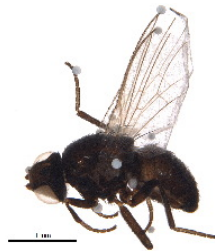

**BIOUG20569-G02 [Lateral]**  
 Agromyzidae  
 Family: Agromyzidae  
 BIN URI: BOLD:ACV5956

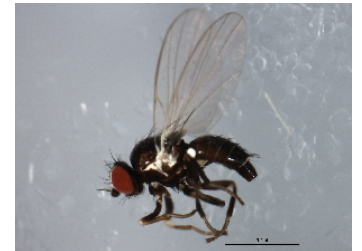

**08TTML-0817 [Lateral]**  
 Agromyzidae  
 Family: Agromyzidae  
 BIN URI: BOLD:AAAN5430

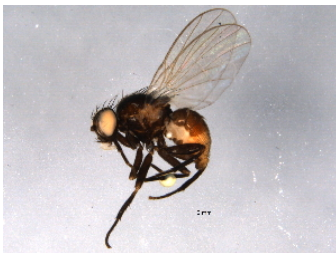

**BIOUG05151-A07 [Lateral]**  
 Agromyzidae  
 Family: Agromyzidae  
 BIN URI: BOLD:AAG4743

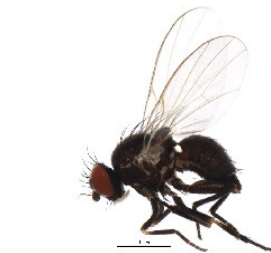

**BIOUG01400-A05 [Lateral]**  
 Agromyzidae  
 Family: Agromyzidae  
 BIN URI: BOLD:AAG9234

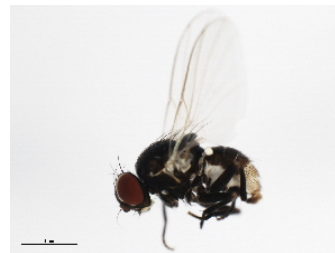

**10JSROW-1341 [Lateral]**  
 Nemorimyza posticata  
 Family: Agromyzidae  
 BIN URI: BOLD:ACJ0616

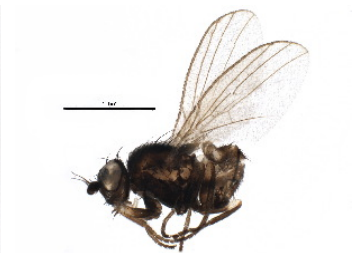

**BIOUG22416-A01 [Lateral]**  
 Cerodontha muscina  
 Family: Agromyzidae  
 BIN URI: BOLD:AAF1051

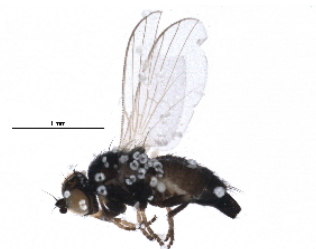

**BIOUG24038-H09 [Lateral]**  
 Agromyzidae  
 Family: Agromyzidae

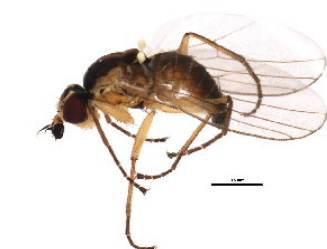

**BIOUG01460-G02 [Lateral]**  
 Agromyzidae  
 Family: Agromyzidae  
 BIN URI: BOLD:AAD1945

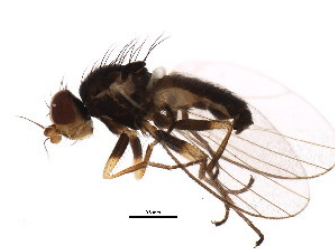

**BIOUG01400-B02 [Lateral]**  
 Agromyzidae  
 Family: Agromyzidae  
 BIN URI: BOLD:AAG4782

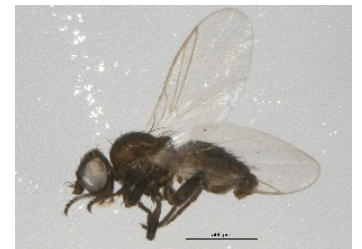

**BIOUG08682-B09 [Lateral]**  
 Agromyzidae  
 Family: Agromyzidae  
 BIN URI: BOLD:AAM6324

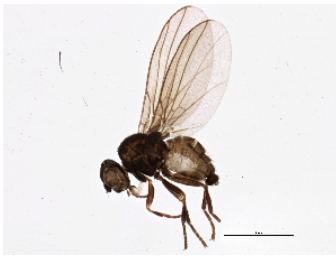

**BIOUG04864-D09 [Lateral]**  
Phytoliriomyza robiniae  
Family: Agromyzidae  
BIN URI: BOLD:AAJ1337

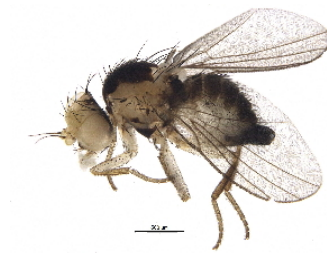

**BIOUG08666-B10 [Lateral]**  
Agromyzidae  
Family: Agromyzidae  
BIN URI: BOLD:ACK1935

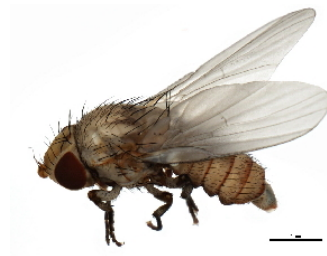

**10PHMAL-0881 [Lateral]**  
Phytobia  
Family: Agromyzidae  
BIN URI: BOLD:AAM7338

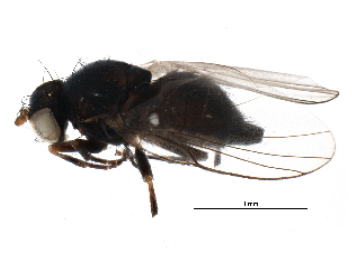

**BIOUG22084-D07 [Lateral]**  
Phytobia  
Family: Agromyzidae  
BIN URI: BOLD:ACV3622

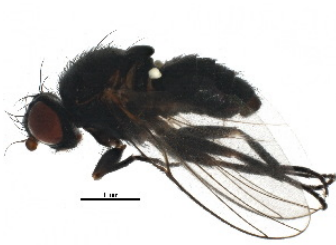

**BIOUG22289-E06 [Lateral]**  
Phytobia  
Family: Agromyzidae  
BIN URI: BOLD:ACV5074

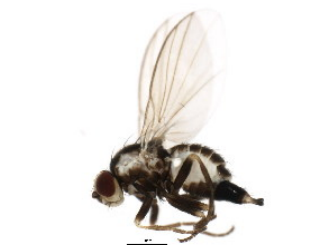

**BIOUG01360-H09 [Lateral]**  
Agromyzidae  
Family: Agromyzidae  
BIN URI: BOLD:AAG4775

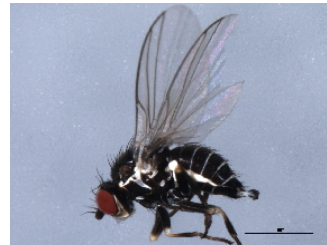

**10JSROW-0012 [Lateral]**  
Phytomyza solidaginophaga  
Family: Agromyzidae  
BIN URI: BOLD:AAL4176

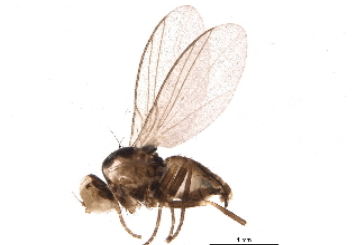

**BIOUG05992-F06 [Lateral]**  
Phytomyza  
Family: Agromyzidae  
BIN URI: BOLD:ACG5827

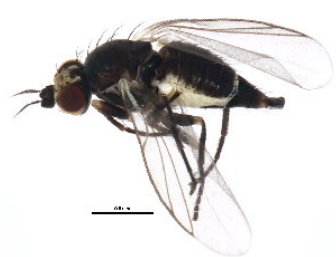

**BIOUG01360-D06 [Lateral]**  
Phytomyza crassiseta  
Family: Agromyzidae  
BIN URI: BOLD:AAL4268

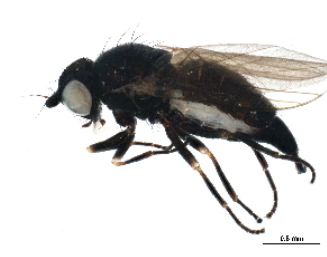

**BIOUG22356-E11 [Lateral]**  
Phytomyza  
Family: Agromyzidae  
BIN URI: BOLD:ACC4458

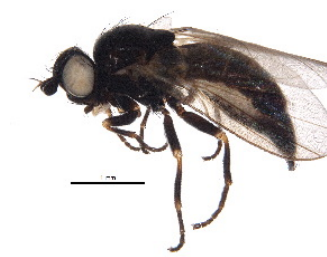

**BIOUG22352-D09 [Lateral]**  
Phytomyza  
Family: Agromyzidae  
BIN URI: BOLD:ACV4673

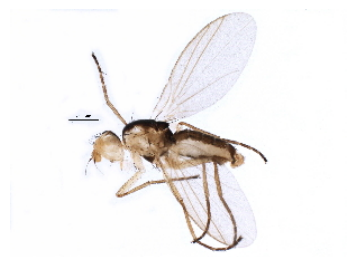

**BIOUG15652-C11 [Lateral]**  
Phytomyza flavicornis  
Family: Agromyzidae  
BIN URI: BOLD:AAH9376

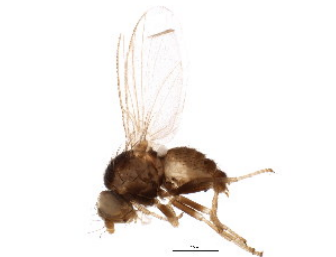

**BIOUG01610-D06 [Lateral]**  
Aulagomyza luteoscutellata  
Family: Agromyzidae  
BIN URI: BOLD:AAJ9681

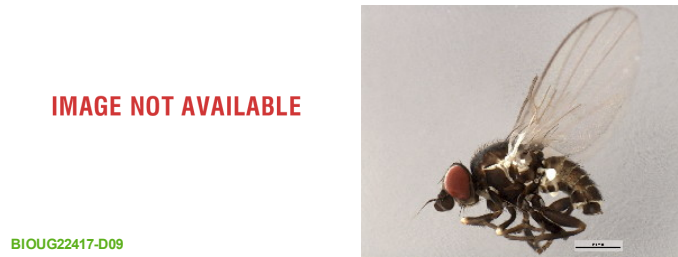

**BIOUG22417-D09**  
Chromatomyia lactuca  
Family: Agromyzidae

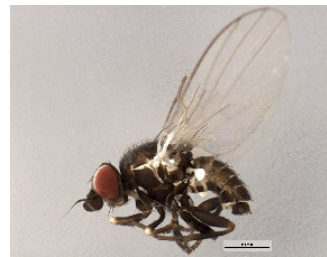

**10JSROW-0693 [Lateral]**  
Cerodontha fasciata  
Family: Agromyzidae  
BIN URI: BOLD:AAF1049

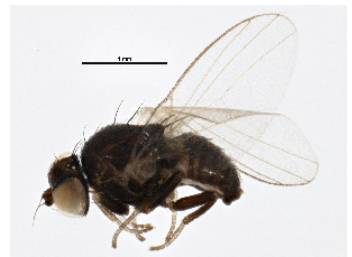

**BIOUG03066-F06 [Lateral]**  
Cerodontha  
Family: Agromyzidae  
BIN URI: BOLD:ACC7605

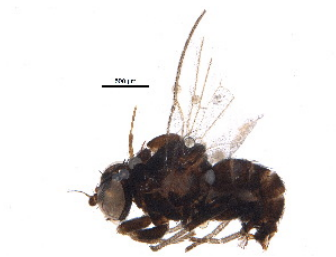

**BIOUG20566-E07 [Lateral]**  
Agromyzidae  
Family: Agromyzidae  
BIN URI: BOLD:ACV3831

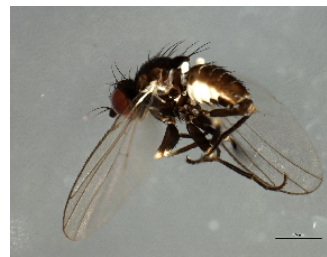

**08BBDIP-2752 [Lateral]**  
Agromyzidae  
Family: Agromyzidae  
BIN URI: BOLD:AAG4741

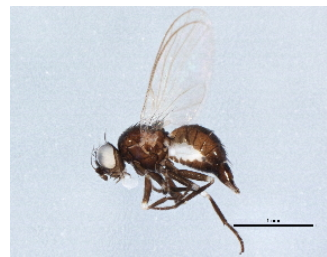

**BIOUG01609-C07 [Lateral]**  
Agromyzidae  
Family: Agromyzidae  
BIN URI: BOLD:AAV4870

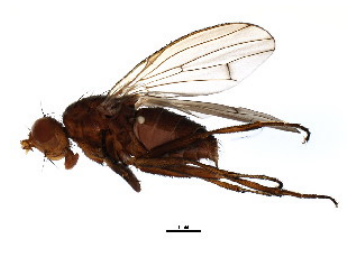

**BIOUG01349-G07 [Lateral]**  
Heleomyzidae  
Family: Heleomyzidae  
BIN URI: BOLD:AAG0464



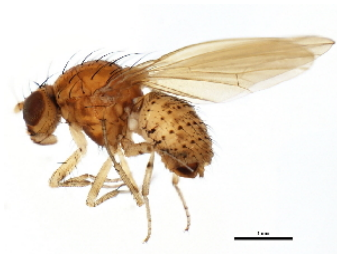

**08TTML-1963 [Lateral]**  
Lauxaniidae  
Family: Lauxaniidae  
BIN URI: BOLD:AAH3532

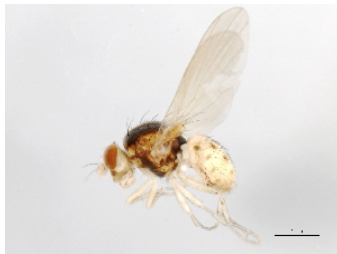

**09BBEDI-0491 [Lateral]**  
Lauxaniidae  
Family: Lauxaniidae  
BIN URI: BOLD:AAH3541

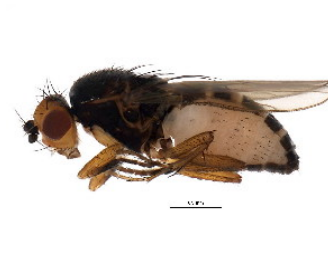

**BIOUG01389-C04 [Lateral]**  
Spelobia ochripes  
Family: Sphaeroceridae  
BIN URI: BOLD:AAG7279

**IMAGE NOT AVAILABLE**

**BIOUG22084-E06**  
Poecilominettia puncticeps  
Family: Lauxaniidae

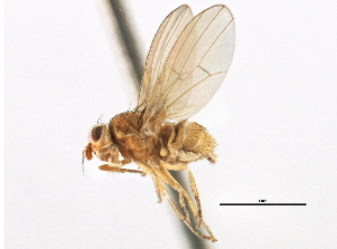

**CCDB-21321-B08 [Lateral]**  
Poecilominettia puncticeps  
Family: Lauxaniidae  
BIN URI: BOLD:AAN8633

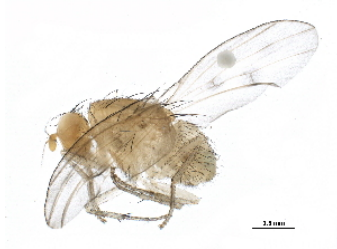

**BIOUG24029-A08 [Lateral]**  
Homoneura  
Family: Lauxaniidae

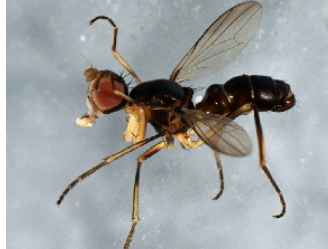

**08TTML-1546 [Lateral]**  
Sepsidae  
Family: Sepsidae  
BIN URI: BOLD:AAG5640

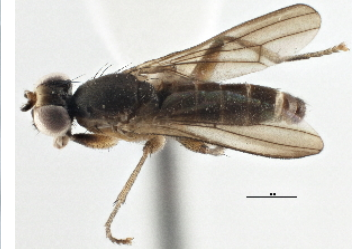

**CCDB-21320-B11 [Lateral]**  
Pteromicra similis  
Family: Sciomyzidae  
BIN URI: BOLD:AAG6869

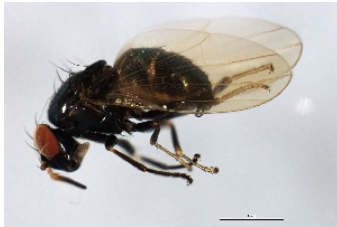

**MTDIC-0039 [Lateral]**  
Lauxania shewelli  
Family: Lauxaniidae  
BIN URI: BOLD:AAH3531

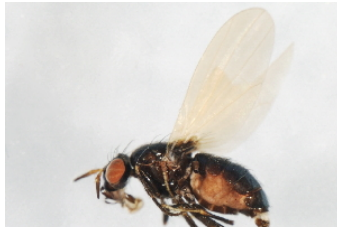

**09BBEDI-0761 [Lateral]**  
Lauxania shewelli  
Family: Lauxaniidae  
BIN URI: BOLD:ACF4012

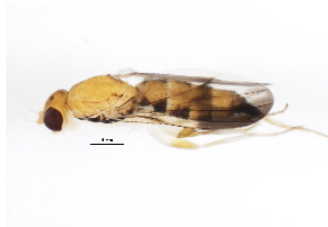

**10JSROW-1504 [Lateral]**  
Clusia czernyi  
Family: Clusiidae  
BIN URI: BOLD:AAF4394

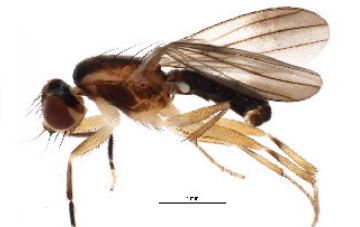

**BIOUG01422-F10 [Lateral]**  
Clusiodes  
Family: Clusiidae  
BIN URI: BOLD:AAJ4032

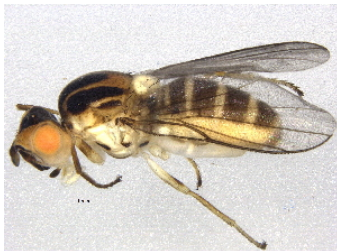

**BIOUG08423-B05 [Lateral]**  
Chloropidae  
Family: Chloropidae  
BIN URI: BOLD:AAH4204

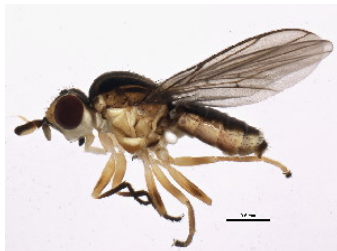

**BIOUG00860-G12 [Lateral]**  
Chloropidae  
Family: Chloropidae  
BIN URI: BOLD:AAH4211

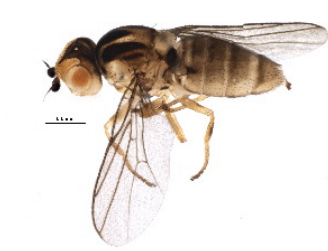

**BIOUG20832-A08 [Lateral]**  
Diptera  
BIN URI: BOLD:ACU5909

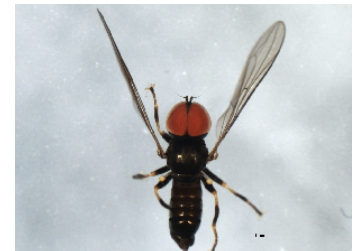

**08TTML-1326 [Dorsal]**  
Pipunculus hertzogi  
Family: Pipunculidae  
BIN URI: BOLD:AAE4793

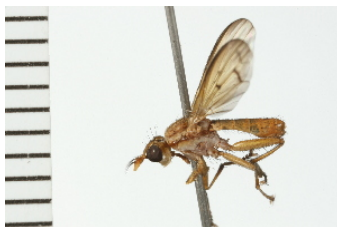

**08BBDIP-0995 [Lateral]**

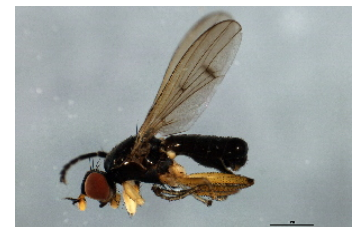

**PROBE-TW0042 [Lateral]**

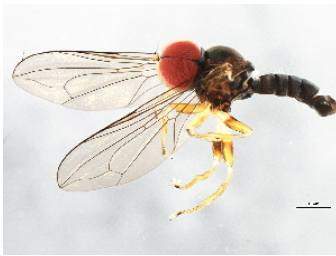

*Tetanocera plumosa*  
Family: Sciomyzidae  
BIN URI: BOLD:AAC2266

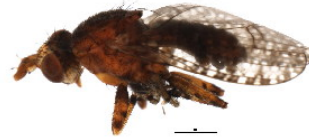

*Anticheta* sp.  
Family: Sciomyzidae  
BIN URI: BOLD:AAG6971

**08TTML-2527 [Lateral]**  
*Pipunculus* sp. ON11  
Family: Pipunculidae  
BIN URI: BOLD:AAF1615

**BI0UG00938-H04 [Lateral]**  
*Dictya* sp. TAW1  
Family: Sciomyzidae  
BIN URI: BOLD:AAG3634

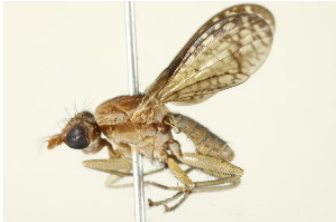

**PCPP10-0116 [Lateral]**  
*Trypetoptera canadensis*  
Family: Sciomyzidae  
BIN URI: BOLD:AAD7383

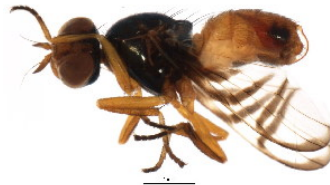

**BI0UG01411-G05 [Lateral]**  
Platystomatidae  
Family: Platystomatidae  
BIN URI: BOLD:AAP8739

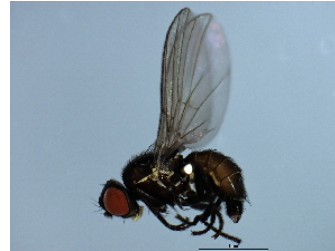

**09BBEDI-2378 [Lateral]**  
*Cerodontha biseta*  
Family: Agromyzidae  
BIN URI: BOLD:AAG4780

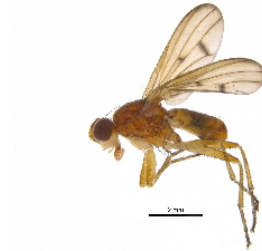

**BI0UG22325-H08 [Lateral]**  
*Renocera*  
Family: Sciomyzidae  
BIN URI: BOLD:ACV3909

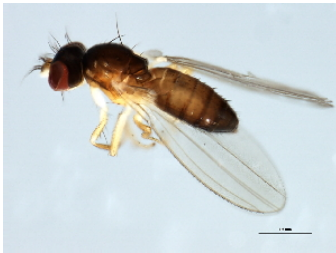

**09BBDIP-1642 [Lateral]**  
*Mumetopia occipitalis*  
Family: Anthomyzidae  
BIN URI: BOLD:AAG4827

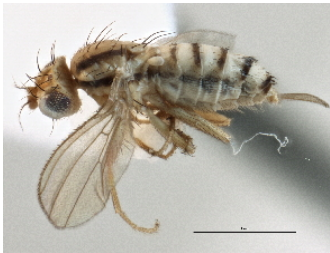

**CCDB-21420-D04 [Lateral]**  
*Stiphrosoma balteatum*  
Family: Anthomyzidae  
BIN URI: BOLD:ABA0747

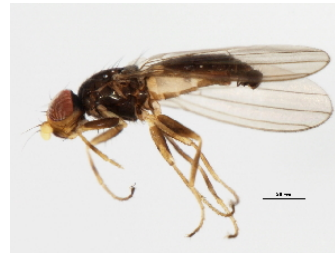

**09BBEDI-0664 [Lateral]**  
*Anthomyza* sp. OL126DEBU  
Family: Anthomyzidae  
BIN URI: BOLD:AAD6605

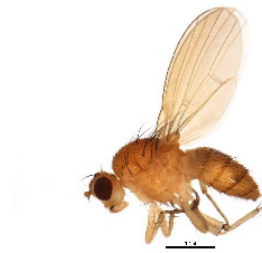

**BI0UG01459-H04 [Lateral]**  
Lauxaniidae  
Family: Lauxaniidae  
BIN URI: BOLD:AAG6753

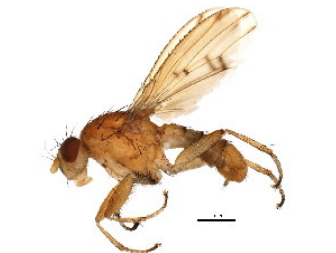

**BI0UG01349-B01 [Lateral]**  
*Suillia quinquepunctata*  
Family: Heleomyzidae  
BIN URI: BOLD:AAC8595

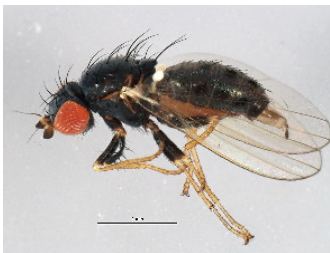

**BI0UG01543-D06 [Lateral]**  
Chamaemyiidae  
Family: Chamaemyiidae  
BIN URI: BOLD:AAG6951

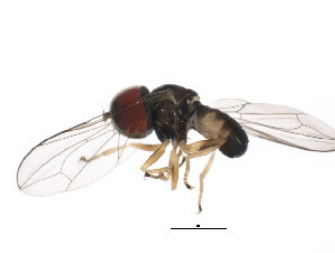

**BI0UG00942-B12 [Lateral]**  
*Cephalops varius*  
Family: Pipunculidae  
BIN URI: BOLD:AAP1931

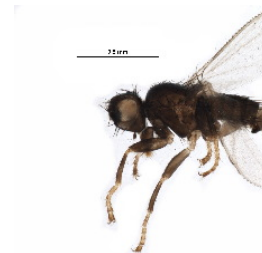

**BI0UG22722-A04 [Lateral]**  
Anthomyiidae  
Family: Anthomyiidae  
BIN URI: BOLD:ACV5822

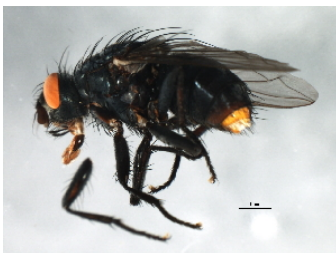

**09BBEDI-1710 [Lateral]**  
*Boettcheria cimbicis*  
Family: Sarcophagidae  
BIN URI: BOLD:AAG6756

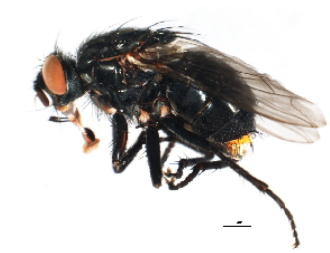

**09BBEDI-0828 [Lateral]**  
*Boettcheria bisetosa*  
Family: Sarcophagidae  
BIN URI: BOLD:AAH7139

IMAGE NOT AVAILABLE

**BI0UG22580-A09**  
*Helicobia*  
Family: Sarcophagidae  
BIN URI: BOLD:AAA1962

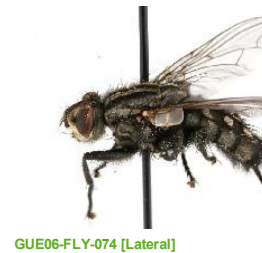

**GUE06-FLY-074 [Lateral]**  
Diptera  
BIN URI: BOLD:AAG6743

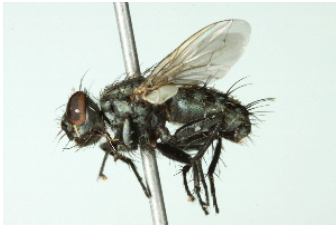

**BIOUG01816-A07 [Lateral]**  
 Sarcophagidae  
 Family: Sarcophagidae  
 BIN URI: BOLD: AAP1218

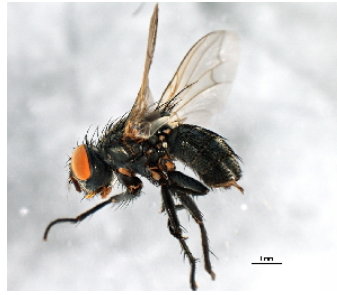

**08TTML-1722 [Lateral]**  
 Sarcophagidae  
 Family: Sarcophagidae  
 BIN URI: BOLD: AAM9291

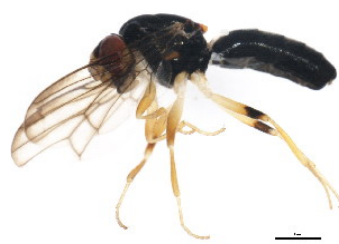

**BIOUG01347-D07 [Lateral]**  
 Chyliza  
 Family: Psilidae  
 BIN URI: BOLD: AAU4506

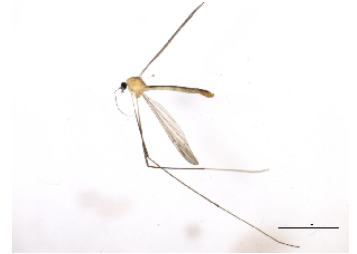

**BIOUG00867-E12 [Lateral]**  
 Limoniidae  
 Family: Limoniidae  
 BIN URI: BOLD: AAN5881

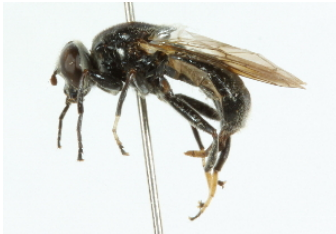

**CNC DIPTERA 43733 [Lateral]**  
 Myolepta nigra  
 Family: Syrphidae  
 BIN URI: BOLD: AAV0836

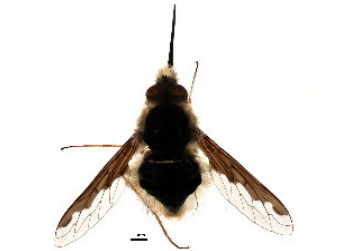

**BIOUG00992-C02 [Dorsal]**  
 Bombyliidae  
 Family: Bombyliidae  
 BIN URI: BOLD: ABV0388

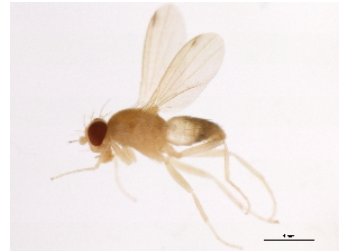

**08TTML-1807 [Lateral]**  
 Clusiodes albimanus  
 Family: Clusiidae  
 BIN URI: BOLD: AAN5648

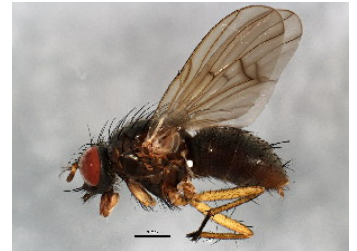

**BIOUG01402-A09 [Lateral]**  
 Phaonia  
 Family: Muscidae  
 BIN URI: BOLD: ACU3950

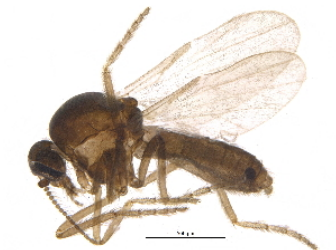

**BIOUG20105-E09 [Lateral]**  
 Diptera  
 BIN URI: BOLD: ACW3173

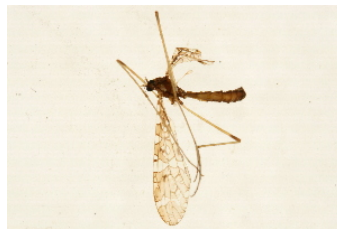

**08BBTIP-059 [Lateral]**  
 Epiphragma  
 Family: Limoniidae  
 BIN URI: BOLD: ACL8650

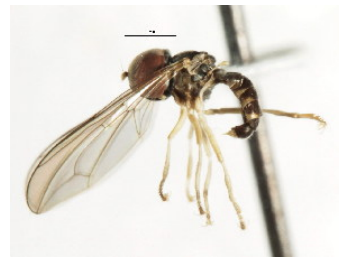

**JSS 15760 [Lateral]**  
 Cephalops pallidivittipes  
 Family: Pipunculidae  
 BIN URI: BOLD: AAG1658

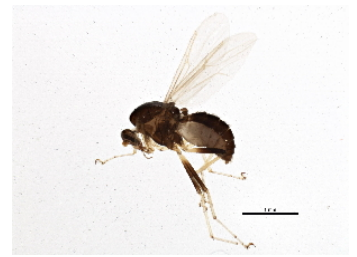

**BIOUG04678-E09 [Lateral]**  
 Stilobezzia  
 Family: Ceratopogonidae  
 BIN URI: BOLD: ACA7683

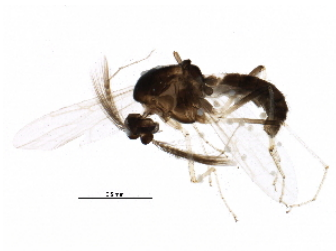

**BIOUG21891-E12 [Lateral]**  
 Stilobezzia antennalis  
 Family: Ceratopogonidae  
 BIN URI: BOLD: ACV4869

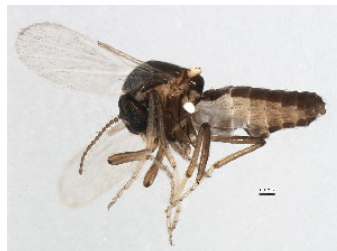

**BIOUG01460-F02 [Lateral]**  
 Ceratopogonidae  
 Family: Ceratopogonidae  
 BIN URI: BOLD: AAG6475

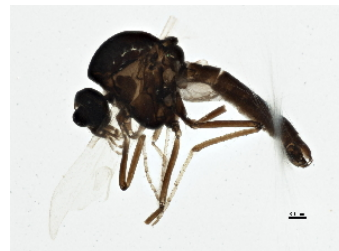

**BIOUG05788-D06 [Lateral]**  
 Ceratopogonidae  
 Family: Ceratopogonidae  
 BIN URI: BOLD: ACG8210

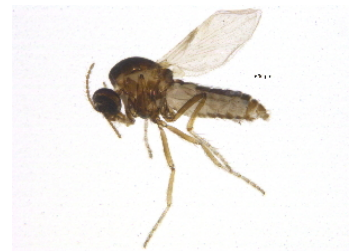

**BIOUG03345-F12 [Lateral]**  
 Dasyhelea  
 Family: Ceratopogonidae  
 BIN URI: BOLD: AAV5177

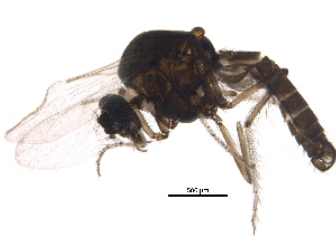

**BIOUG22328-A10 [Lateral]**

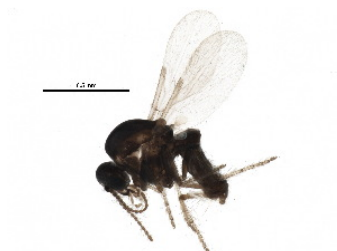

**BIOUG22467-B06 [Lateral]**

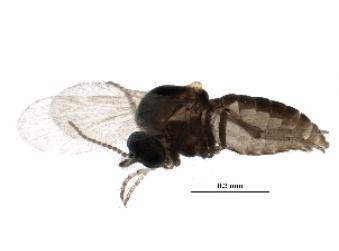

**BIOUG22084-G03 [Lateral]**

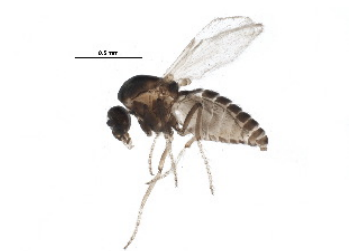

**BIOUG22291-C09 [Lateral]**

Ceratopogonidae  
Family: Ceratopogonidae  
BIN URI: BOLD:AA07716

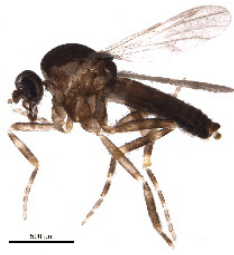

**BIOUG22454-D08 [Lateral]**  
Ceratopogonidae  
Family: Ceratopogonidae  
BIN URI: BOLD:ACV4324

Ceratopogonidae  
Family: Ceratopogonidae  
BIN URI: BOLD:ACV3172

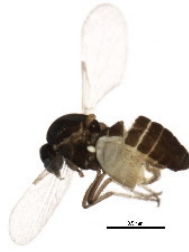

**BIOUG01345-E02 [Lateral]**  
Dasyhelea  
Family: Ceratopogonidae  
BIN URI: BOLD:AAU6592

Ceratopogonidae  
Family: Ceratopogonidae  
BIN URI: BOLD:ACV3306

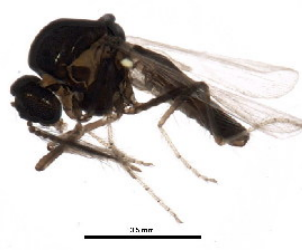

**BIOUG01348-H05 [Lateral]**  
Dasyhelea  
Family: Ceratopogonidae  
BIN URI: BOLD:AAN5154

Dasyhelea  
Family: Ceratopogonidae  
BIN URI: BOLD:AAN5161

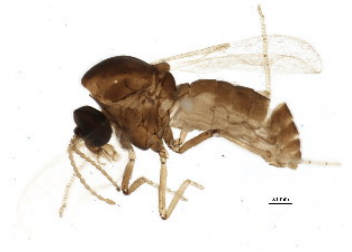

**BIOUG01611-E08 [Lateral]**  
Dasyhelea  
Family: Ceratopogonidae  
BIN URI: BOLD:ABV1354

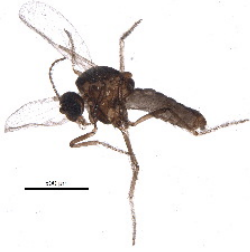

**BIOUG22454-C11 [Lateral]**  
Ceratopogonidae  
Family: Ceratopogonidae  
BIN URI: BOLD:ACV4557

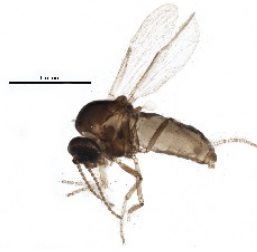

**BIOUG21794-D04 [Lateral]**  
Diptera

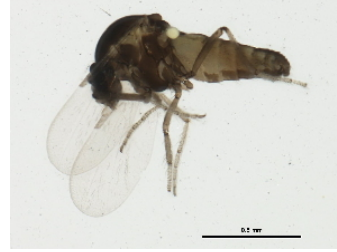

**BIOUG01410-F08 [Lateral]**  
Ceratopogonidae  
Family: Ceratopogonidae  
BIN URI: BOLD:AAP6703

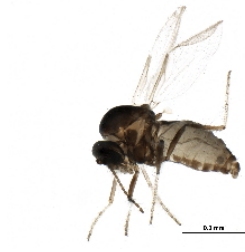

**BIOUG22365-B12 [Lateral]**  
Ceratopogonidae  
Family: Ceratopogonidae  
BIN URI: BOLD:AAQ2556

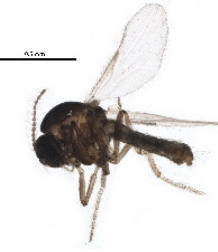

**BIOUG22733-B10 [Lateral]**  
Ceratopogonidae  
Family: Ceratopogonidae  
BIN URI: BOLD:ACV4888

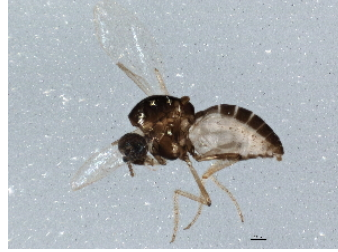

**BIOUG06085-D02 [Lateral]**  
Dasyhelea  
Family: Ceratopogonidae  
BIN URI: BOLD:ACG3349

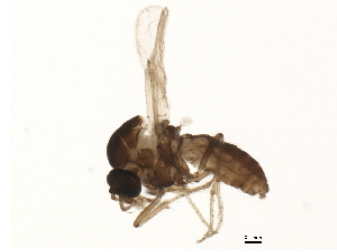

**BIOUG01132-A11 [Lateral]**  
Dasyhelea  
Family: Ceratopogonidae  
BIN URI: BOLD:ACV5193

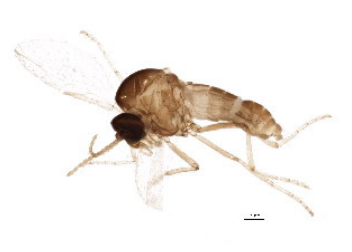

**BIOUG01611-A09 [Lateral]**  
Ceratopogonidae  
Family: Ceratopogonidae  
BIN URI: BOLD:ABV1356

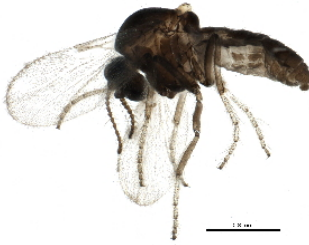

**BIOUG22359-D08 [Lateral]**  
Dasyhelea  
Family: Ceratopogonidae  
BIN URI: BOLD:AAV5098

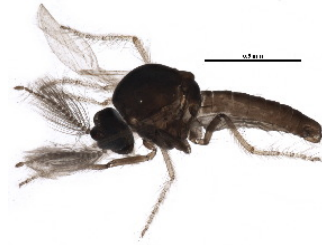

**BIOUG22716-D09 [Lateral]**  
Ceratopogonidae  
Family: Ceratopogonidae  
BIN URI: BOLD:ACV5326

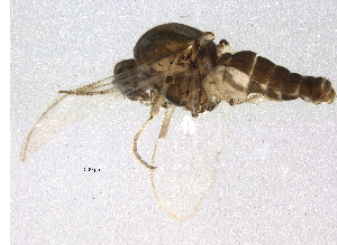

**BIOUG03164-H11 [Lateral]**  
Dasyhelea  
Family: Ceratopogonidae  
BIN URI: BOLD:AAN5172

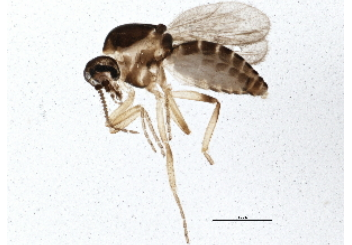

**BIOUG05000-G11 [Lateral]**  
Ceratopogonidae  
Family: Ceratopogonidae  
BIN URI: BOLD:ACD9562

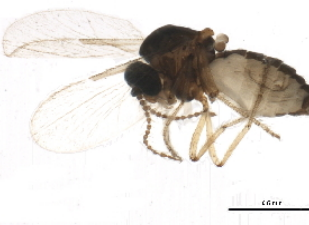

**BIOUG01130-A10 [Lateral]**  
Dasyhelea  
Family: Ceratopogonidae  
BIN URI: BOLD:AAU6535

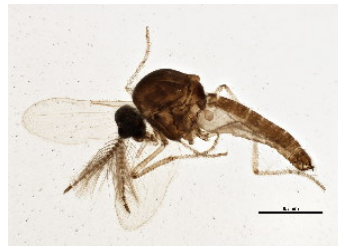

**BIOUG02755-F11 [Lateral]**  
Dasyhelea  
Family: Ceratopogonidae  
BIN URI: BOLD:ACA7494

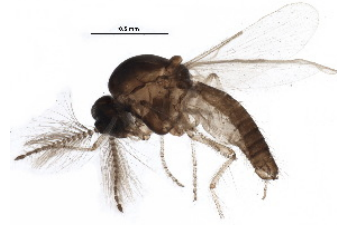

**BIOUG22417-H06 [Lateral]**  
Dasyhelea  
Family: Ceratopogonidae  
BIN URI: BOLD:AAY6464

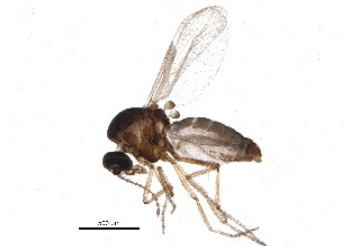

**BIOUG10967-H06 [Lateral]**  
Ceratopogonidae  
Family: Ceratopogonidae  
BIN URI: BOLD:ABX7385

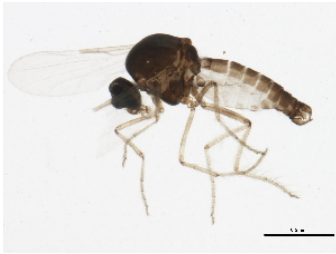

**10PHMAL-3455 [Lateral]**  
Dasyhelea  
Family: Ceratopogonidae  
BIN URI: BOLD:AAU6477

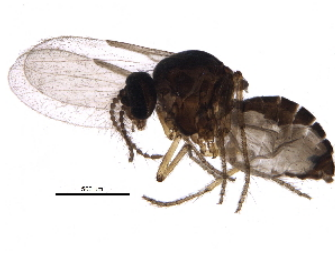

**BIOUG08653-G06 [Lateral]**  
Ceratopogonidae  
Family: Ceratopogonidae  
BIN URI: BOLD:ACK2715

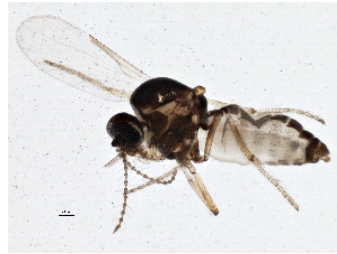

**BIOUG03028-A07 [Lateral]**  
Ceratopogonidae  
Family: Ceratopogonidae  
BIN URI: BOLD:AAN5151

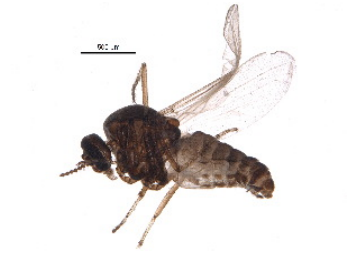

**BIOUG20566-E01 [Lateral]**  
Ceratopogonidae  
Family: Ceratopogonidae  
BIN URI: BOLD:ACV5946

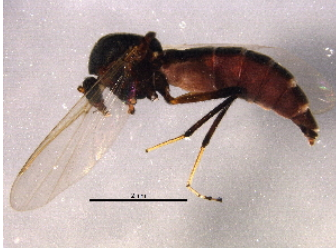

**BIOUG10174-B02 [Lateral]**  
Ceratopogonidae  
Family: Ceratopogonidae  
BIN URI: BOLD:ACL5068

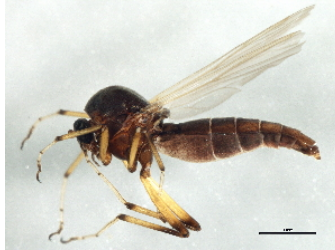

**BIOUG01544-E08 [Lateral]**  
Ceratopogonidae  
Family: Ceratopogonidae  
BIN URI: BOLD:ACV4442

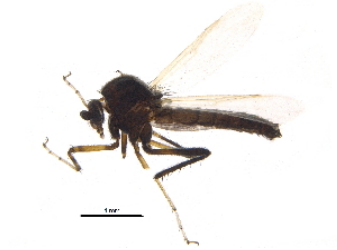

**BIOUG22573-D03 [Lateral]**  
Ceratopogoninae  
Family: Ceratopogonidae  
BIN URI: BOLD:AAV5157

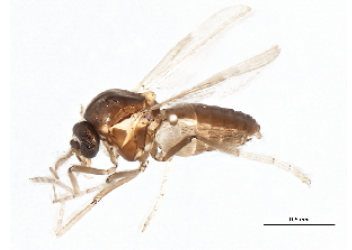

**08TTML-2482 [Lateral]**  
Forcipomyia  
Family: Ceratopogonidae  
BIN URI: BOLD:AAN5149

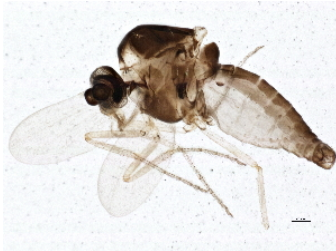

**BIOUG02892-E06 [Lateral]**  
Ceratopogonidae  
Family: Ceratopogonidae  
BIN URI: BOLD:ACB5406

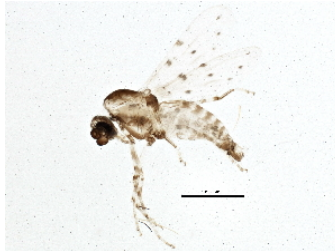

**BIOUG06082-E09 [Lateral]**  
Alluaudomyia  
Family: Ceratopogonidae  
BIN URI: BOLD:ACG4727

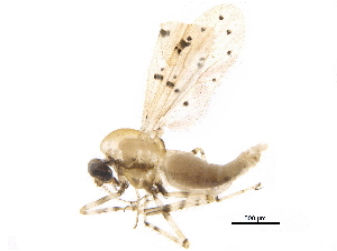

**BIOUG22718-A01 [Lateral]**  
Ceratopogoninae  
Family: Ceratopogonidae  
BIN URI: BOLD:ABW9876

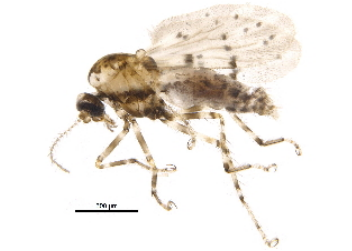

**BIOUG22719-D08 [Lateral]**  
Ceratopogoninae  
Family: Ceratopogonidae  
BIN URI: BOLD:ACV4258

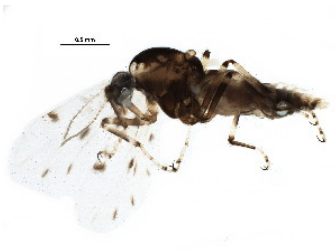

**BIOUG22725-E03 [Lateral]**  
Ceratopogonidae  
Family: Ceratopogonidae  
BIN URI: BOLD:ACV5978

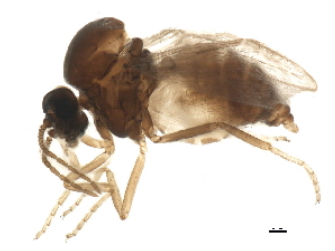

**BIOUG01116-H06 [Lateral]**  
Forcipomyia  
Family: Ceratopogonidae  
BIN URI: BOLD:AAQ0307

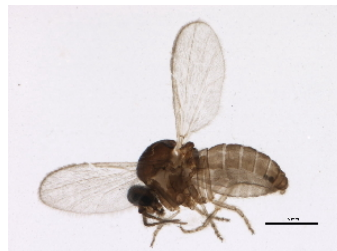

**10PHMAL-2926 [Lateral]**  
Forcipomyia  
Family: Ceratopogonidae  
BIN URI: BOLD:AAU6519

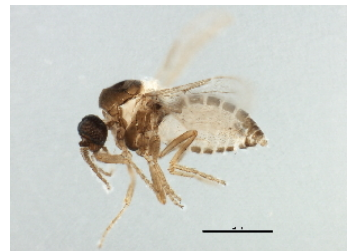

**BIOUG01120-A12 [Lateral]**  
Forcipomyia  
Family: Ceratopogonidae  
BIN URI: BOLD:AAN5153

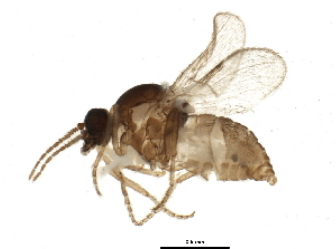

**BIOUG01127-E12 [Lateral]**  
Forcipomyia  
Family: Ceratopogonidae  
BIN URI: BOLD:ABZ3626

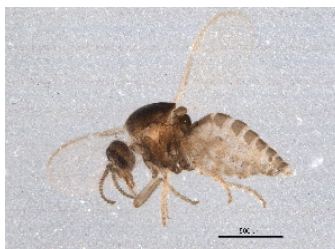

**BIOUG05800-A09 [Lateral]**  
Forcipomyia  
Family: Ceratopogonidae  
BIN URI: BOLD:AAQ0594

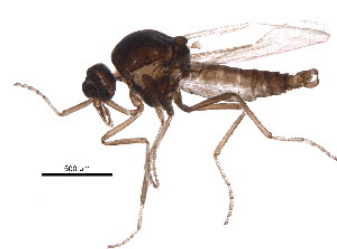

**BIOUG22353-B08 [Lateral]**  
Forcipomyia  
Family: Ceratopogonidae  
BIN URI: BOLD:AAM6191

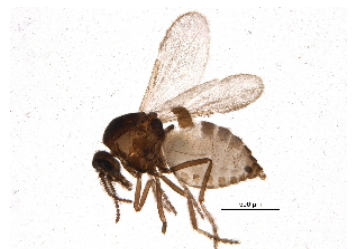

**BIOUG06690-A01 [Lateral]**  
Forcipomyia  
Family: Ceratopogonidae  
BIN URI: BOLD:AAN5165

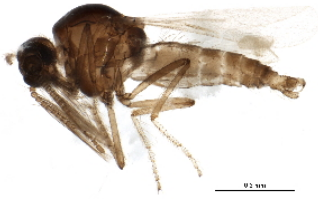

**BIOUG08142-C08 [Lateral]**  
 Ceratopogonidae  
 Family: Ceratopogonidae  
 BIN URI: BOLD:AA5155

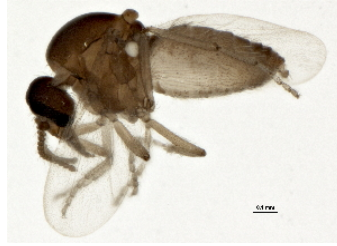

**BIOUG02056-F06 [Lateral]**  
 Forcipomyia  
 Family: Ceratopogonidae  
 BIN URI: BOLD:AAV5144

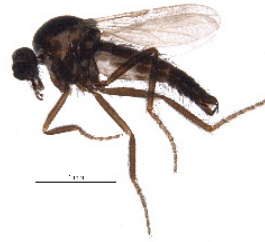

**BIOUG22356-G06 [Lateral]**  
 Forcipomyia  
 Family: Ceratopogonidae  
 BIN URI: BOLD:AAV5212

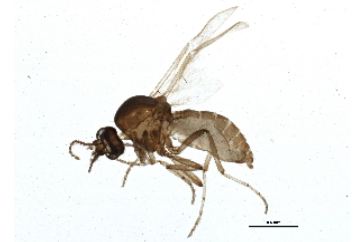

**BIOUG05788-D04 [Lateral]**  
 Ceratopogonidae  
 Family: Ceratopogonidae  
 BIN URI: BOLD:ACG3798

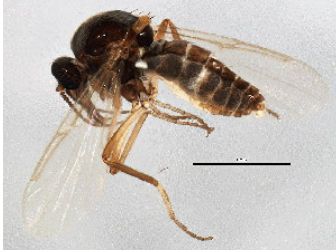

**BIOUG01923-A04 [Lateral]**  
 Atrichopogon  
 Family: Ceratopogonidae  
 BIN URI: BOLD:AAG6519

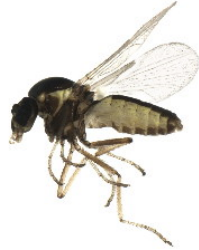

**BIOUG01348-E03 [Lateral]**  
 Dasyhelea  
 Family: Ceratopogonidae  
 BIN URI: BOLD:AA5162

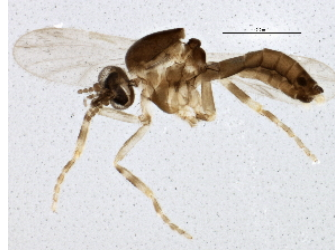

**BIOUG04698-D04 [Lateral]**  
 Forcipomyia  
 Family: Ceratopogonidae  
 BIN URI: BOLD:ACC4125

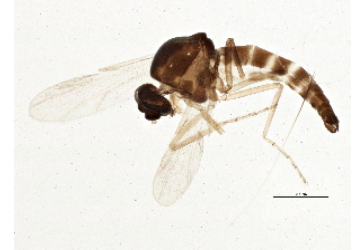

**BIOUG02662-E11 [Lateral]**  
 Ceratopogonidae  
 Family: Ceratopogonidae  
 BIN URI: BOLD:ACQ9076

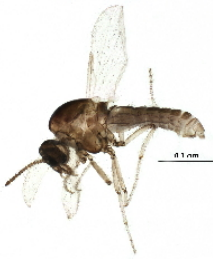

**BIOUG05781-A04 [Lateral]**  
 Dasyhelea  
 Family: Ceratopogonidae  
 BIN URI: BOLD:ACN5021

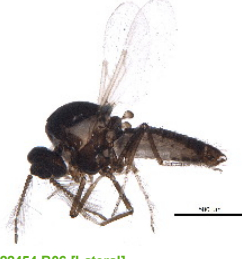

**BIOUG22454-B06 [Lateral]**  
 Ceratopogonidae  
 Family: Ceratopogonidae  
 BIN URI: BOLD:ACV4507

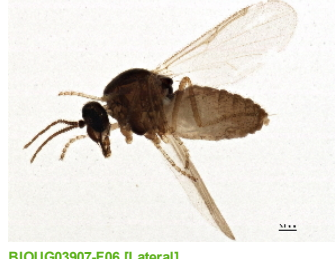

**BIOUG03907-F06 [Lateral]**  
 Atrichopogon  
 Family: Ceratopogonidae  
 BIN URI: BOLD:AAG6431

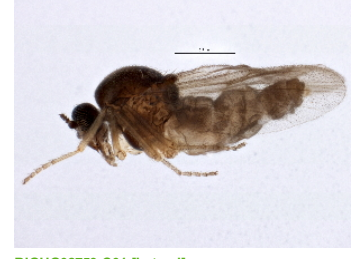

**BIOUG02759-C01 [Lateral]**  
 Atrichopogon  
 Family: Ceratopogonidae  
 BIN URI: BOLD:AAG3631

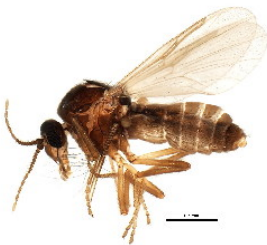

**BIOUG01915-H03 [Lateral]**  
 Atrichopogon  
 Family: Ceratopogonidae  
 BIN URI: BOLD:AAG6494

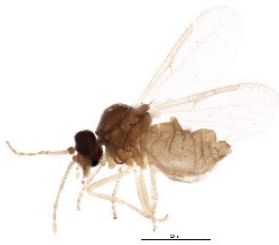

**BIOUG01695-E08 [Lateral]**  
 Atrichopogon  
 Family: Ceratopogonidae  
 BIN URI: BOLD:ABA0806

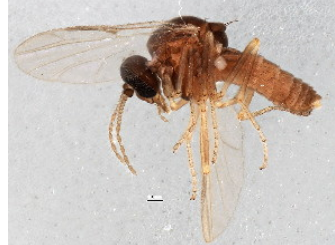

**BIOUG01929-D04 [Lateral]**  
 Atrichopogon  
 Family: Ceratopogonidae  
 BIN URI: BOLD:AAG6452

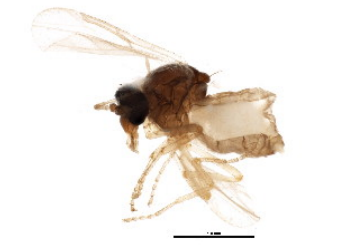

**BIOUG01885-A07 [Lateral]**  
 Atrichopogon  
 Family: Ceratopogonidae  
 BIN URI: BOLD:ABV9306

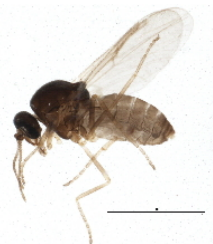

**BIOUG02976-C11 [Lateral]**  
 Atrichopogon  
 Family: Ceratopogonidae  
 BIN URI: BOLD:ACA3626

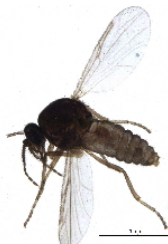

**BIOUG10373-D01 [Lateral]**  
 Atrichopogon  
 Family: Ceratopogonidae  
 BIN URI: BOLD:ACL4764

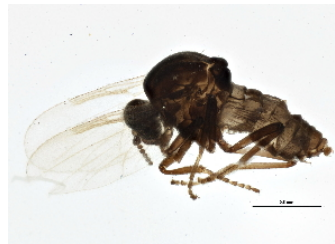

**BIOUG05788-E02 [Lateral]**  
 Atrichopogon  
 Family: Ceratopogonidae  
 BIN URI: BOLD:AAP6915

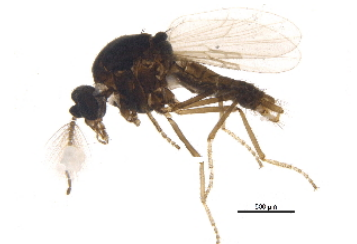

**BIOUG22457-F08 [Lateral]**  
 Atrichopogon  
 Family: Ceratopogonidae  
 BIN URI: BOLD:ACV5558

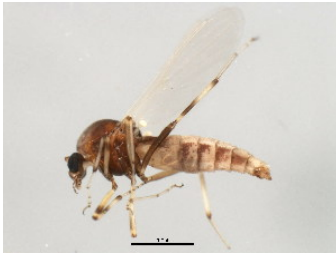

**BIOUG01543-F10 [Lateral]**  
 Ceratopogonidae  
 Family: Ceratopogonidae  
 BIN URI: BOLD:ABW1518

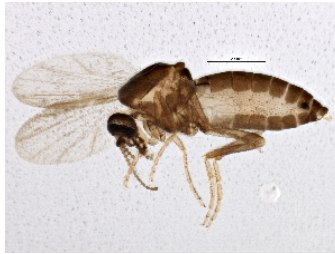

**BIOUG03287-G01 [Lateral]**  
 Forcipomyia  
 Family: Ceratopogonidae  
 BIN URI: BOLD:ACA7885

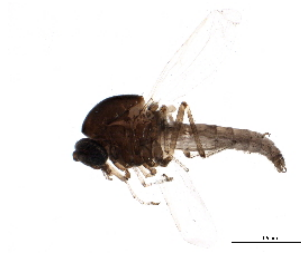

**BIOUG22459-F04 [Lateral]**  
 Ceratopogonidae  
 Family: Ceratopogonidae  
 BIN URI: BOLD:AAN5158

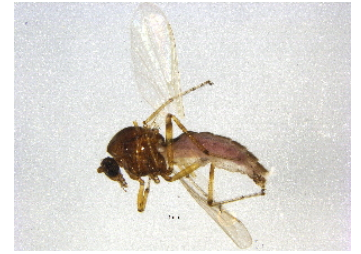

**BIOUG03899-F12 [Lateral]**  
 Ceratopogonidae  
 Family: Ceratopogonidae  
 BIN URI: BOLD:ACR1960

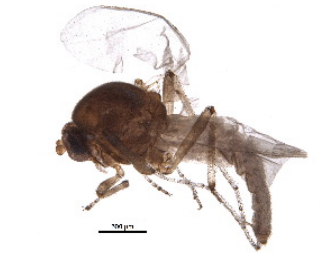

**BIOUG21890-F05 [Lateral]**  
 Bezzia  
 Family: Ceratopogonidae  
 BIN URI: BOLD:ACV5708

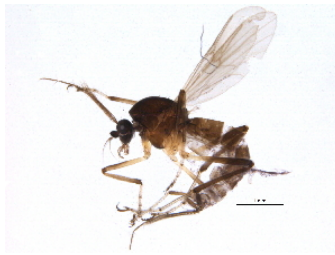

**BIOUG04067-H11 [Lateral]**  
 Clinohoea  
 Family: Ceratopogonidae  
 BIN URI: BOLD:AAG6451

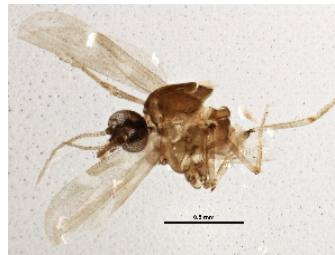

**BIOUG02849-G12 [Lateral]**  
 Culicoides  
 Family: Ceratopogonidae  
 BIN URI: BOLD:AAM6184

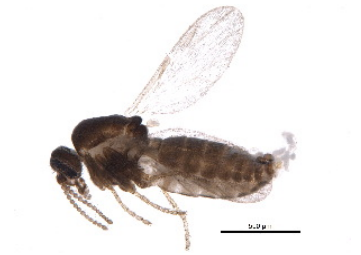

**BIOUG22454-B02 [Lateral]**  
 Ceratopogonidae  
 Family: Ceratopogonidae  
 BIN URI: BOLD:ACA4406

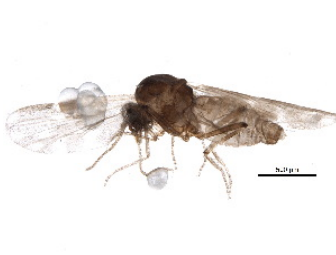

**BIOUG11859-B09 [Lateral]**  
 Culicoides  
 Family: Ceratopogonidae  
 BIN URI: BOLD:AAN5166

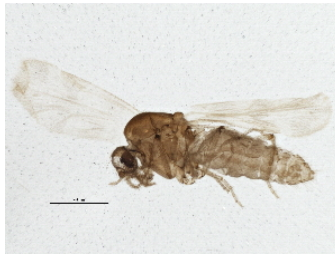

**BIOUG03327-H11 [Lateral]**  
 Culicoides  
 Family: Ceratopogonidae  
 BIN URI: BOLD:ACC3892

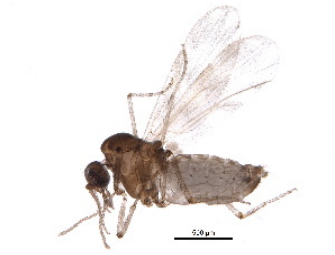

**BIOUG22454-B11 [Lateral]**  
 Culicoides  
 Family: Ceratopogonidae  
 BIN URI: BOLD:ACV4326

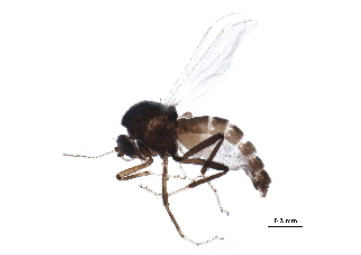

**BIOUG20729-B09 [Lateral]**  
 Diptera  
 BIN URI: BOLD:ACU4023

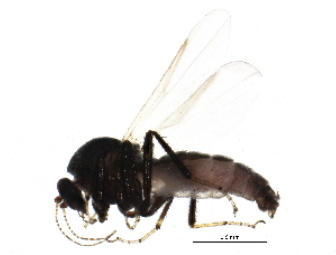

**BIOUG24002-A05 [Lateral]**  
 Bezzia  
 Family: Ceratopogonidae

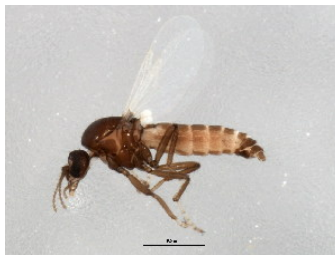

**BIOUG01924-F07 [Lateral]**  
 Brachypogon  
 Family: Ceratopogonidae  
 BIN URI: BOLD:AAL7405

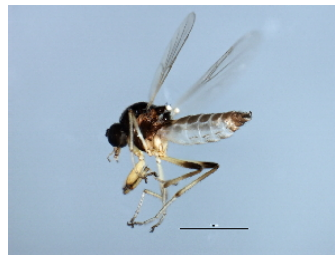

**09BBEDI-2381 [Lateral]**  
 Palpomyia  
 Family: Ceratopogonidae  
 BIN URI: BOLD:AAM6196

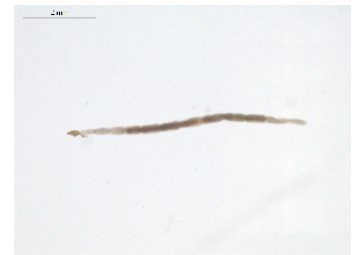

**BIOUG02700-A12 [Lateral]**  
 Ceratopogonidae  
 Family: Ceratopogonidae  
 BIN URI: BOLD:ACH0425

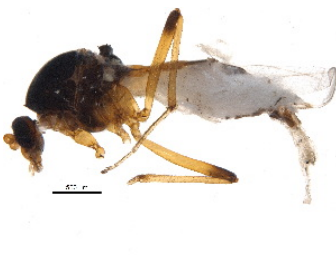

**BIOUG24024-D02 [Lateral]**  
 Palpomyia  
 Family: Ceratopogonidae

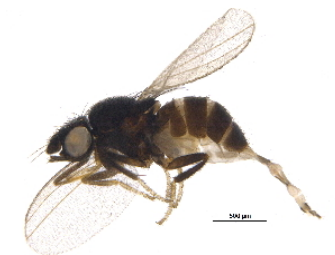

**BIOUG23076-A02 [Lateral]**  
 Paramyia nitens  
 Family: Milichidae  
 BIN URI: BOLD:AAG0166

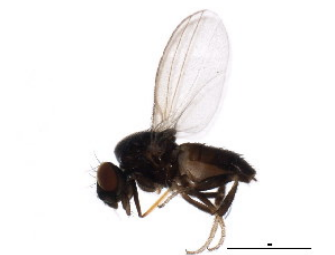

**BIOUG01360-C05 [Lateral]**  
 Paramyia nitens  
 Family: Milichidae  
 BIN URI: BOLD:AAG0169

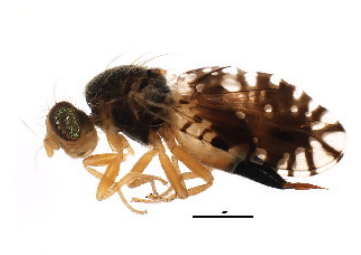

**BIOUG01408-B03 [Lateral]**  
 Tephritidae  
 Family: Tephritidae  
 BIN URI: BOLD:AAC6384

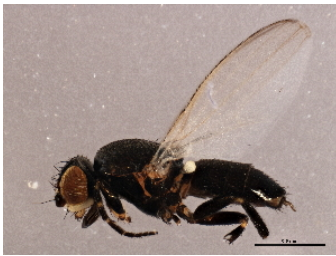

**BIOUG02713-C10 [Lateral]**  
*Leptometopa latipes*  
 Family: Milichidae  
 BIN URI: BOLD:AAP8985

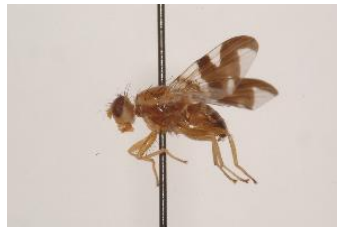

**TEPH165 [Lateral]**  
*Rhagoletis suavis*  
 Family: Tephritidae  
 BIN URI: BOLD:AA0136

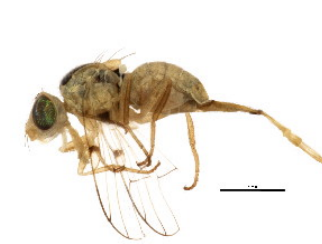

**BIOUG01244-H02 [Lateral]**  
 Tephritidae  
 Family: Tephritidae  
 BIN URI: BOLD:ABX6599

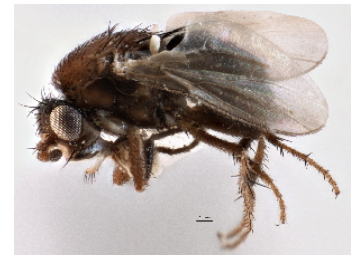

**CCDB-21403-A01 [Lateral]**  
*Coproica ferruginata*  
 Family: Sphaeroceridae  
 BIN URI: BOLD:AAN6407

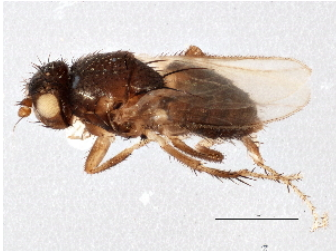

**BIOUG01677-H01 [Lateral]**  
*Coproica hirtula*  
 Family: Sphaeroceridae  
 BIN URI: BOLD:ACF7714

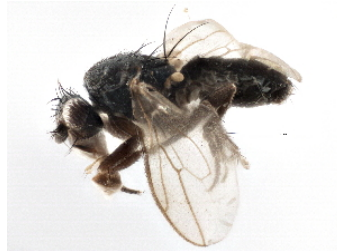

**CCDB-21402-D03 [Lateral]**  
*Spelobia clunipes*  
 Family: Sphaeroceridae  
 BIN URI: BOLD:AAG7312

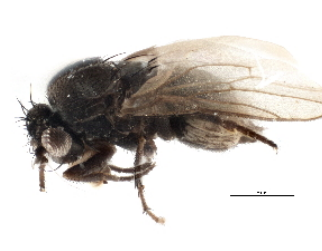

**CCDB-21402-C12 [Lateral]**  
*Spelobia clunipes*  
 Family: Sphaeroceridae  
 BIN URI: BOLD:AAN6405

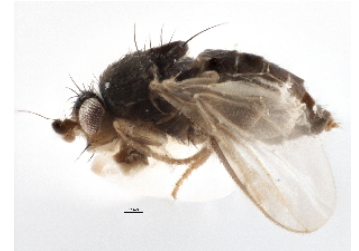

**CCDB-21402-C04 [Lateral]**  
*Spelobia bifrons*  
 Family: Sphaeroceridae  
 BIN URI: BOLD:AAN6408

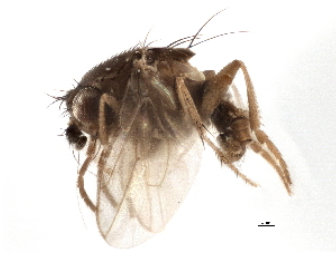

**CCDB-21402-F01 [Lateral]**  
*Spelobia semiculata*  
 Family: Sphaeroceridae  
 BIN URI: BOLD:AAL7752

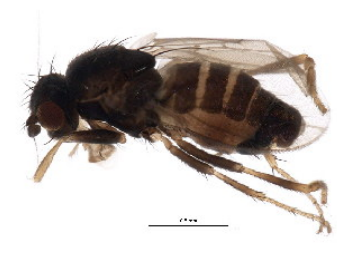

**BIOUG01360-C08 [Lateral]**  
 Sphaeroceridae  
 Family: Sphaeroceridae  
 BIN URI: BOLD:AAG7308

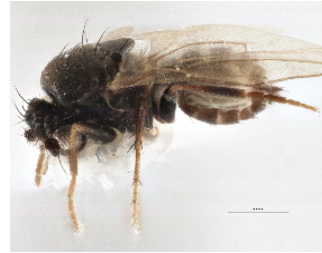

**CCDB-21402-E06 [Lateral]**  
*Spelobia quinata*  
 Family: Sphaeroceridae  
 BIN URI: BOLD:AAN6415

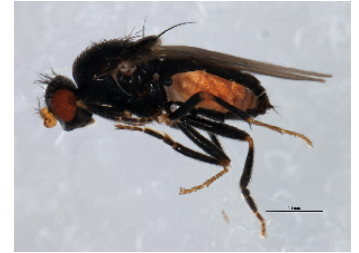

**08TTML-1015 [Lateral]**  
 Sphaeroceridae  
 Family: Sphaeroceridae  
 BIN URI: BOLD:AAG7309

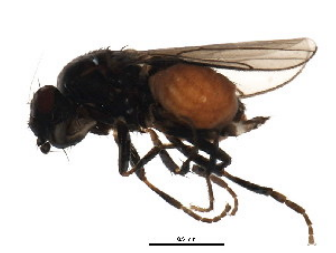

**BIOUG01337-E05 [Lateral]**  
 Sphaeroceridae  
 Family: Sphaeroceridae  
 BIN URI: BOLD:AAN6409

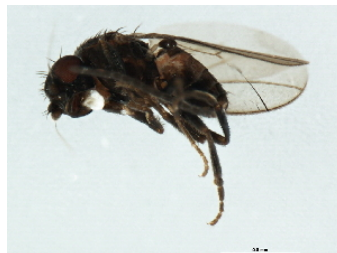

**10BBBDIP-3459 [Lateral]**  
 Sphaeroceridae  
 Family: Sphaeroceridae  
 BIN URI: BOLD:AAN6414

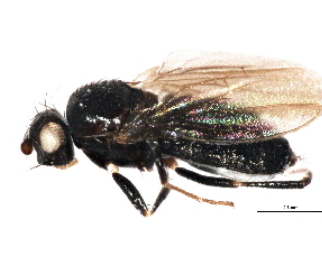

**BIOUG02825-D01 [Lateral]**  
 Sphaeroceridae  
 Family: Sphaeroceridae  
 BIN URI: BOLD:ACA4498

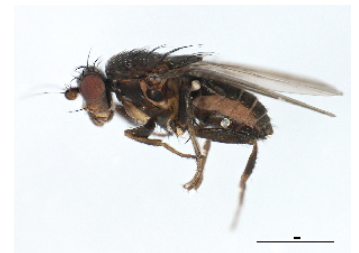

**10BBBDIP-1275 [Lateral]**  
 Leptocera erythrocerata  
 Family: Sphaeroceridae  
 BIN URI: BOLD:AAG7276

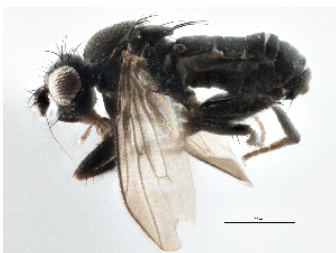

**CCDB-21401-H04 [Lateral]**  
*Apteromyia claviventris*  
 Family: Sphaeroceridae  
 BIN URI: BOLD:AAG7283

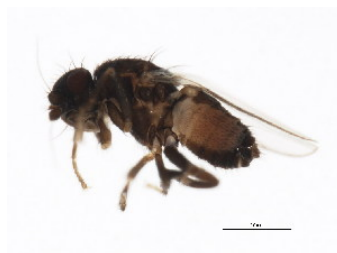

**09BBDIP-1144 [Lateral]**  
 Sphaeroceridae  
 Family: Sphaeroceridae  
 BIN URI: BOLD:AAG7292

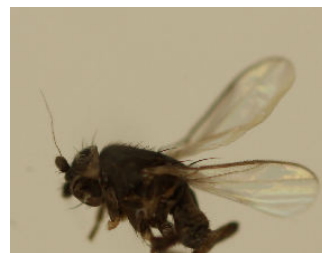

**MZH\_HP.1104 [Lateral]**  
*Telomerina flavipes*  
 Family: Sphaeroceridae  
 BIN URI: BOLD:ACJ1971

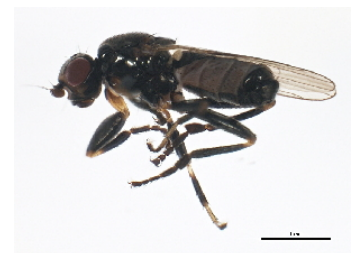

**BIOUG00904-G07 [Lateral]**  
 Sphaeroceridae  
 Family: Sphaeroceridae  
 BIN URI: BOLD:AAH3548



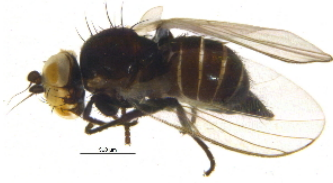

**BIOUG03210-F10 [Lateral]**  
 Agromyzidae  
 Family: Agromyzidae  
 BIN URI: BOLD:AAN5432

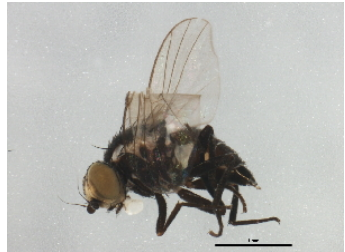

**BIOUG01142-C09 [Lateral]**  
 Calycomyza majuscula  
 Family: Agromyzidae  
 BIN URI: BOLD:AAV4861

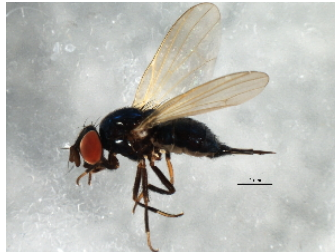

**08TTML-1971 [Lateral]**  
 Lonchaeinae  
 Family: Lonchaeidae  
 BIN URI: BOLD:AAG7064

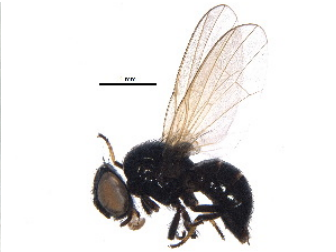

**BIOUG22356-B11 [Lateral]**  
 Lonchaeidae  
 Family: Lonchaeidae  
 BIN URI: BOLD:AAP2540

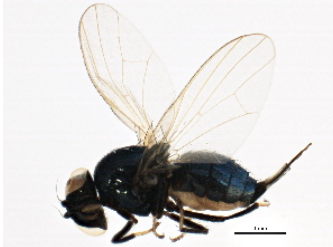

**BIOUG05510-H10 [Lateral]**  
 Lonchaea  
 Family: Lonchaeidae  
 BIN URI: BOLD:AAG7070

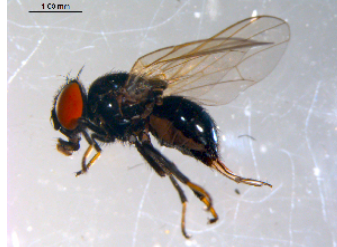

**10PROBE-11259 [Lateral]**  
 Lonchaea sp. TAW4  
 Family: Lonchaeidae  
 BIN URI: BOLD:AAP8895

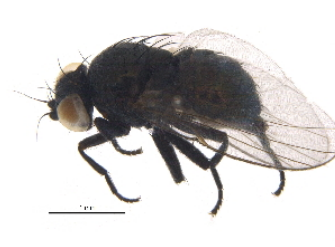

**BIOUG22330-B09 [Lateral]**  
 Japanagomyza viridula  
 Family: Agromyzidae  
 BIN URI: BOLD:AAI7960

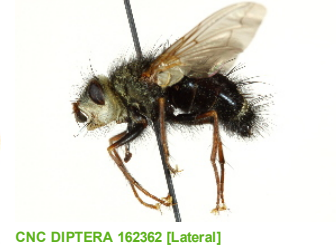

**CNC DIPTERA 162362 [Lateral]**  
 Epalpus signifier  
 Family: Tachinidae  
 BIN URI: BOLD:ABZ2493

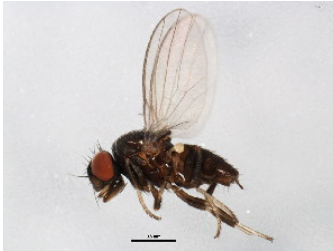

**BIOUG01426-F07 [Lateral]**  
 Milichiidae  
 Family: Milichiidae  
 BIN URI: BOLD:AAG0172

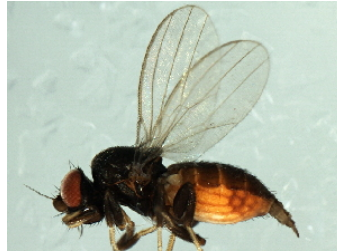

**08TTML-1260 [Lateral]**  
 Milichiidae  
 Family: Milichiidae  
 BIN URI: BOLD:AAG0174

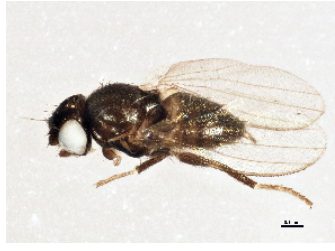

**BIOUG03278-D09 [Lateral]**  
 Milichiidae  
 Family: Milichiidae  
 BIN URI: BOLD:AAN8612

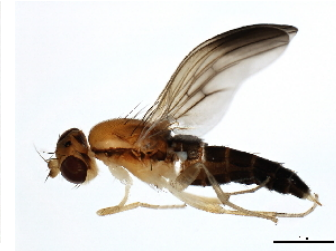

**10PHMAL-1243 [Lateral]**  
 Clusiodes melanostomus  
 Family: Clusiidae  
 BIN URI: BOLD:AAJ4031

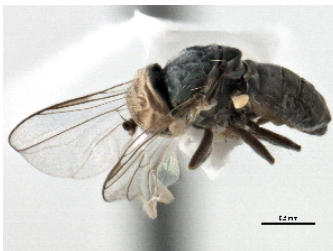

**CNC DIPTERA 158661 [Lateral]**  
 Chalarus sp. CA9  
 Family: Pipunculidae  
 BIN URI: BOLD:AAI7230

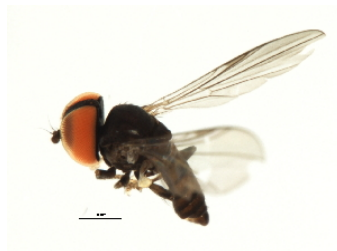

**MTDIC-0104 [Lateral]**  
 Chalarus decorus  
 Family: Pipunculidae  
 BIN URI: BOLD:AAG1657

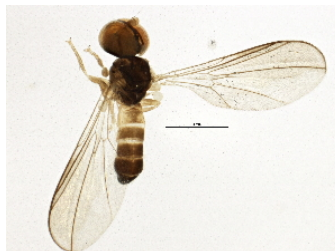

**BIOUG03279-G02 [Dorsal]**  
 Chalarus sp. OR1  
 Family: Pipunculidae  
 BIN URI: BOLD:ACI4153

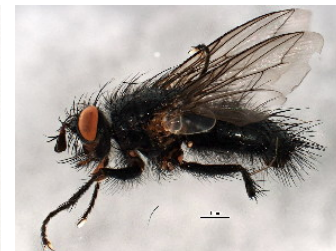

**BIOUG01459-A02 [Lateral]**  
 Tachinidae  
 Family: Tachinidae  
 BIN URI: BOLD:AAP3780

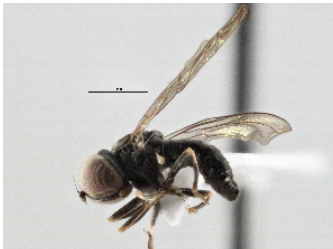

**CNC DIPTERA 136934 [Lateral]**  
 Tomosvaryella sp. ON18  
 Family: Pipunculidae  
 BIN URI: BOLD:AAG1656

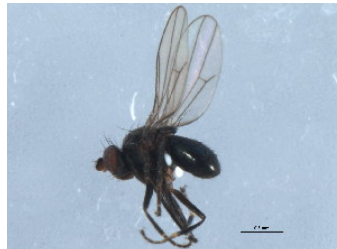

**10JSROW-0178 [Lateral]**  
 Hydrella albilabris  
 Family: Ephydriidae  
 BIN URI: BOLD:AAP6348

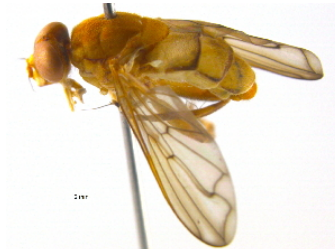

**BIOUG04570-D11 [Lateral]**  
 Brachyopa punctipennis  
 Family: Syrphidae  
 BIN URI: BOLD:ACE7625

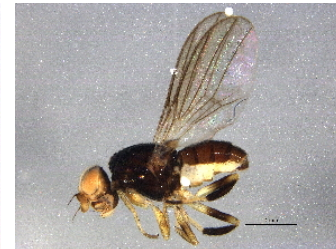

**BIOUG05094-D12 [Lateral]**  
 Psilacrum arpidia  
 Family: Chloropidae  
 BIN URI: BOLD:ACE0829

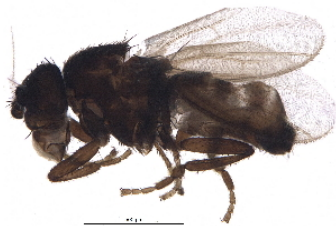

**BIOUG08448-E03 [Lateral]**  
 Sphaeroceridae  
 Family: Sphaeroceridae  
 BIN URI: BOLD:ACK0161

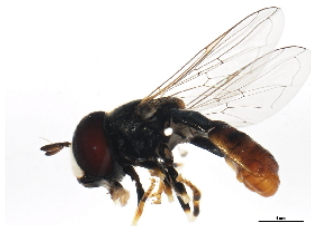

**BIOUG00904-C07 [Lateral]**  
 Paragus haemorrhous  
 Family: Syrphidae  
 BIN URI: BOLD:AAC2438

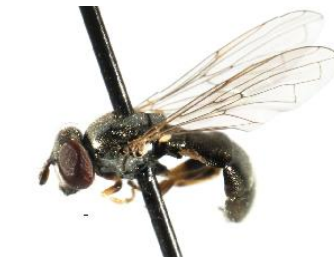

**Cp 2007 - 87 [Lateral]**  
 Neoascia distincta  
 Family: Syrphidae  
 BIN URI: BOLD:AAG6766

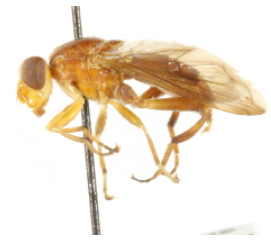

**CNC DIPTERA 49268 [Lateral]**  
 Brachyopa sedmani  
 Family: Syrphidae  
 BIN URI: BOLD:AAy8902

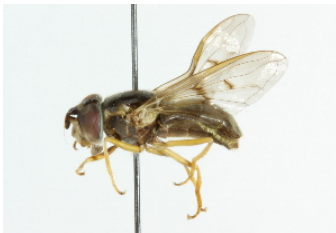

**CNC DIPTERA 36580 [Lateral]**  
 Ferdinandea buccata  
 Family: Syrphidae  
 BIN URI: BOLD:AAE0948

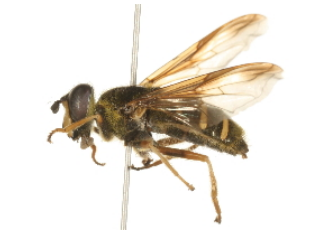

**08TTML-0550 [Lateral]**  
 Sericomyia chrysotoxoides  
 Family: Syrphidae  
 BIN URI: BOLD:ABX5395

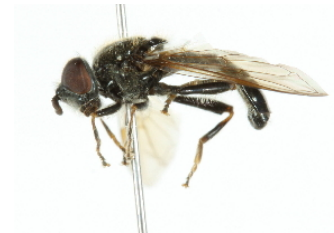

**CNC DIPTERA 142 [Lateral]**  
 Pipiza femoralis  
 Family: Syrphidae  
 BIN URI: BOLD:AAM7334

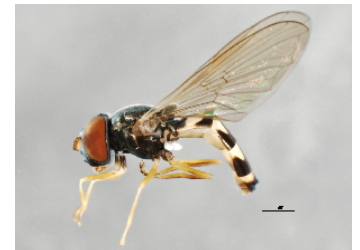

**09BBEDI-1095 [Lateral]**  
 Melanostoma  
 Family: Syrphidae  
 BIN URI: BOLD:AAB2866

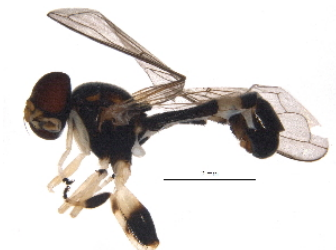

**BIOUG09750-G02 [Lateral]**  
 Sphegina keeniana  
 Family: Syrphidae  
 BIN URI: BOLD:ACR0385

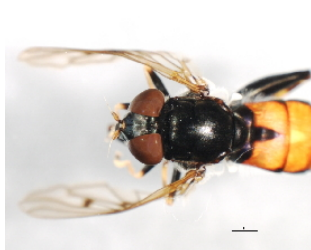

**09BBEDI-1211 [Dorsal]**  
 Chalcosyrphus libo  
 Family: Syrphidae  
 BIN URI: BOLD:AAG4679

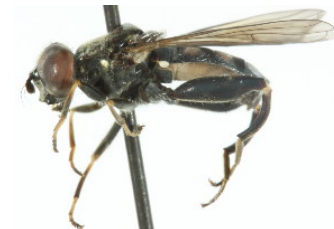

**JK00623 [Lateral]**  
 Chalcosyrphus nemorum  
 Family: Syrphidae  
 BIN URI: BOLD:AAG6762

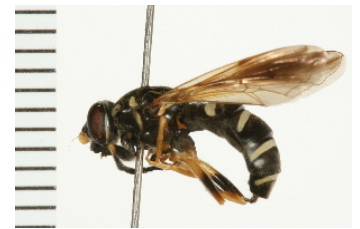

**08BBDIP-0095 [Lateral]**  
 Temnostoma balyras  
 Family: Syrphidae  
 BIN URI: BOLD:AAD2789

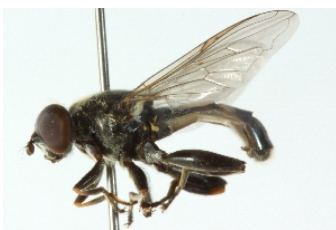

**CNC DIPTERA 48709 [Lateral]**  
 Xylota annulifera  
 Family: Syrphidae  
 BIN URI: BOLD:AAG0857

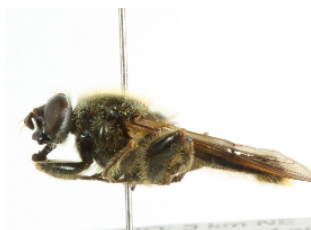

**CNC DIPTERA 37752 [Lateral]**  
 Brachypalpus oarus  
 Family: Syrphidae  
 BIN URI: BOLD:AAP8757

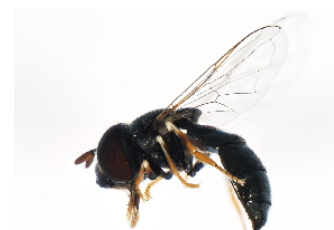

**10JSROW-1685 [Lateral]**  
 Paragus haemorrhous  
 Family: Syrphidae  
 BIN URI: BOLD:AAC2439

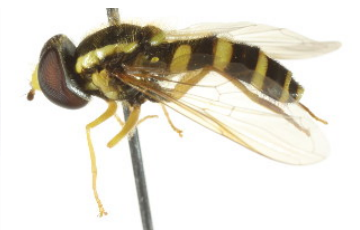

**JSS 18632 [Lateral]**  
 Xanthogramma flavipes  
 Family: Syrphidae  
 BIN URI: BOLD:AAK0114

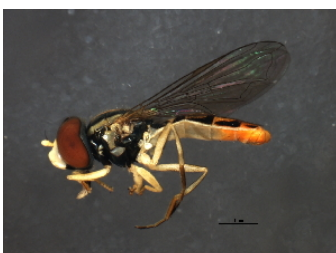

**08BBDIP-2174 [Lateral]**

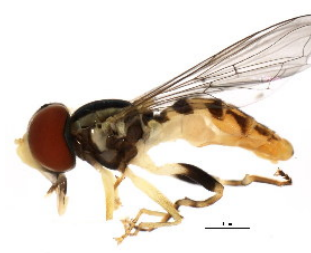

**BIOUG01364-H03 [Lateral]**

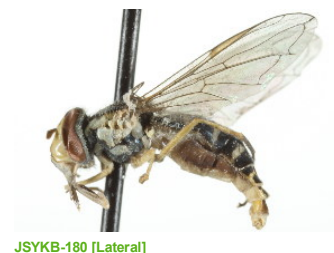

**JSYKB-180 [Lateral]**  
 Sphaerophoria  
 Family: Syrphidae

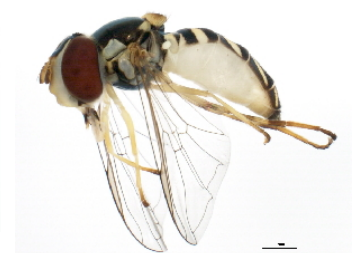

**BIOUG01794-C01 [Lateral]**

Toxomerus marginatus  
Family: Syrphidae  
BIN URI: BOLD:AAA4277

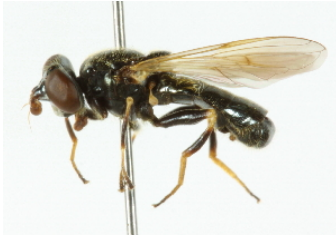

**CNC DIPTERA 45250 [Lateral]**  
*Lejota aerea*  
Family: Syrphidae  
BIN URI: BOLD:AA99807

Toxomerus geminatus  
Family: Syrphidae  
BIN URI: BOLD:AAC1312

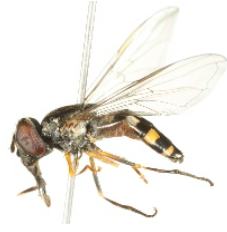

**10BBCDIP-2680 [Lateral]**  
*Platycheirus peltatoides*  
Family: Syrphidae  
BIN URI: BOLD:AAC6630

BIN URI: BOLD:AAA7374

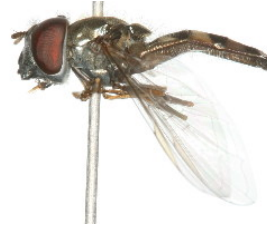

**09BBDIP-0286 [Lateral]**  
*Platycheirus obscurus*  
Family: Syrphidae  
BIN URI: BOLD:AAF1237

*Allograpta obliqua*  
Family: Syrphidae  
BIN URI: BOLD:AAD8276

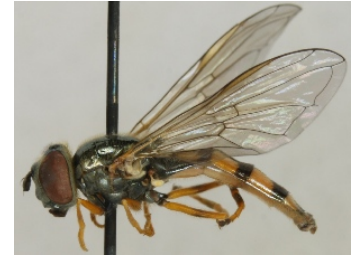

**jka09-05324 [Lateral]**  
*Platycheirus immarginatus*  
Family: Syrphidae  
BIN URI: BOLD:AAA9506

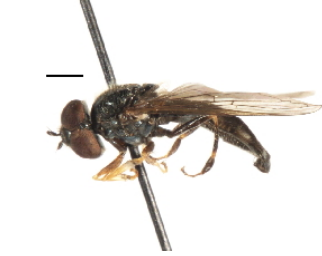

**CNC DIPTERA 26022 [Lateral]**  
*Platycheirus hyperboreus*  
Family: Syrphidae  
BIN URI: BOLD:ACF4734

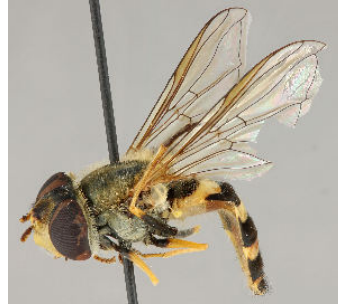

**MZH\_HP.15 [Lateral]**  
*Syrphus vitripennis*  
Family: Syrphidae  
BIN URI: BOLD:AAB5577

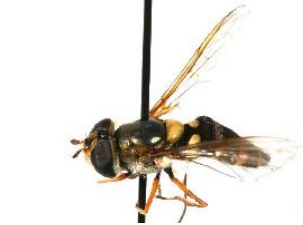

**CHU06-SYR-004 [Lateral]**  
*Syrphus ribesii*  
Family: Syrphidae  
BIN URI: BOLD:AAA4570

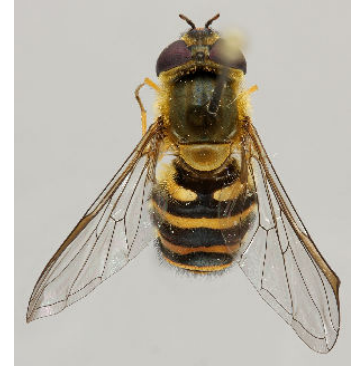

**MZH\_HP.25 [Dorsal]**  
*Syrphus torvus*  
Family: Syrphidae  
BIN URI: BOLD:AAC6088

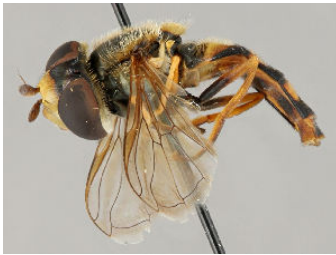

**MZH\_HP.35 [Lateral]**  
*Eupeodes latifasciatus*  
Family: Syrphidae  
BIN URI: BOLD:AAB2384

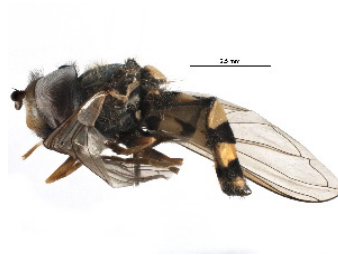

**BIOUG22360-C01 [Lateral]**  
Syrphinae  
Family: Syrphidae  
BIN URI: BOLD:ACU2992

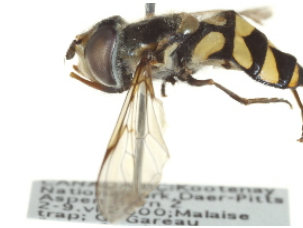

**CNC DIPTERA 135215 [Lateral]**  
*Didea fuscipes*  
Family: Syrphidae  
BIN URI: BOLD:AAI9913

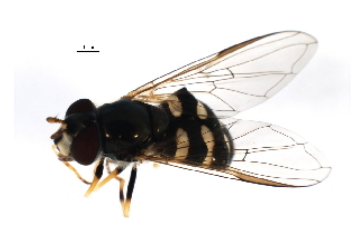

**10JSROW-0562 [Dorsal]**  
*Dasysyrphus venustus*  
Family: Syrphidae  
BIN URI: BOLD:ACV5348

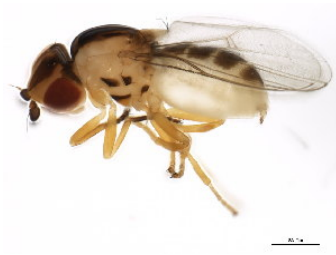

**BIOUG01410-C11 [Lateral]**  
Chloropidae  
Family: Chloropidae  
BIN URI: BOLD:AAH4135

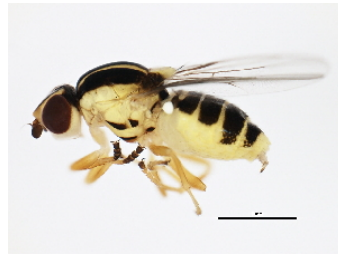

**BIOUG00915-C02 [Lateral]**  
*Thaumatomyia glabra*  
Family: Chloropidae  
BIN URI: BOLD:ABY9688

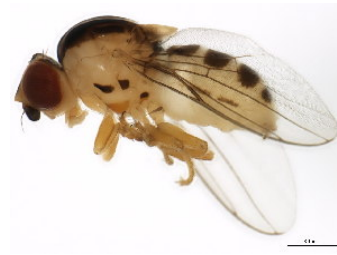

**BIOUG01410-C09 [Lateral]**  
Chloropidae  
Family: Chloropidae  
BIN URI: BOLD:ABY9689

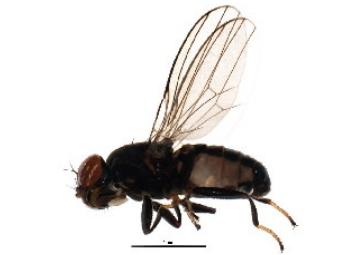

**BIOUG01352-A05 [Lateral]**  
*Aulacigaster neoleucopeza*  
Family: Aulacigasteridae  
BIN URI: BOLD:AAV0437

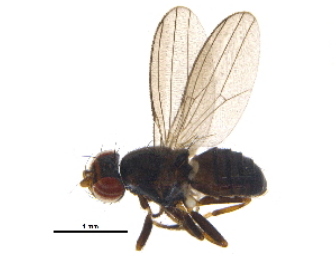

**BIOUG21482-E08 [Lateral]**

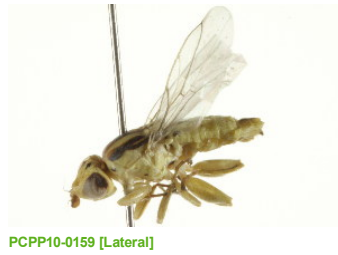

**PCPP10-0159 [Lateral]**  
*Meromyza*

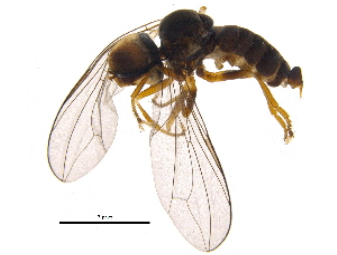

**BIOUG22329-E12 [Lateral]**

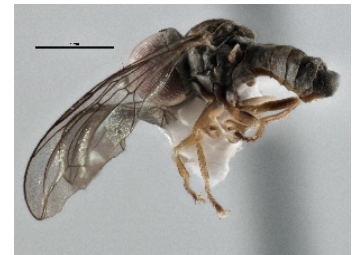

**CNC DIPTERA 137523 [Lateral]**

Aulacigaster neoleucopeza  
Family: Aulacigastriidae  
BIN URI: BOLD:ABV3853

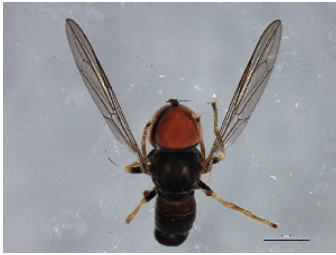

08TTML-1135 [Dorsal]  
Eudorylas sp. ON7  
Family: Pipunculidae  
BIN URI: BOLD:AAM9392

Family: Chloropidae  
BIN URI: BOLD:AAH4205

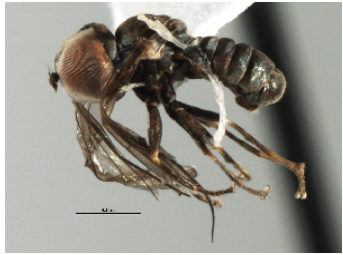

CNC DIPTERA 135982 [Lateral]  
Eudorylas sp. YT3  
Family: Pipunculidae  
BIN URI: BOLD:AAJ0213

Eudorylas  
Family: Pipunculidae  
BIN URI: BOLD:AAI5103

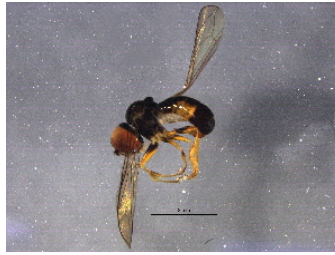

BIOUG06627-C04 [Lateral]  
Dorylomorpha hardyi  
Family: Pipunculidae  
BIN URI: BOLD:ABY5401

Eudorylas sp. ON20  
Family: Pipunculidae  
BIN URI: BOLD:AAJ0212

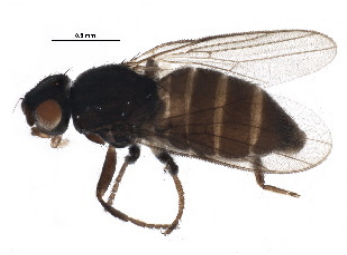

BIOUG22456-E01 [Lateral]  
Chloropidae  
Family: Chloropidae  
BIN URI: BOLD:ACV5279

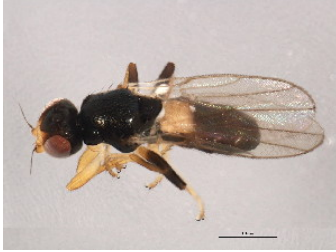

10JSROW-0652 [Dorsal]  
Chloropidae  
Family: Chloropidae  
BIN URI: BOLD:ACE3223

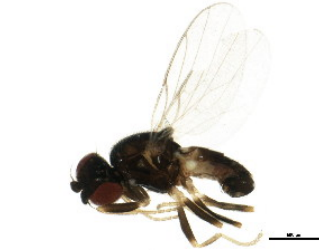

BIOUG01348-B11 [Lateral]  
Gaurax pallidipes  
Family: Chloropidae  
BIN URI: BOLD:AAH4210

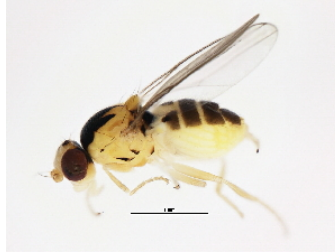

10JSROW-1531 [Lateral]  
Gaurax pallidipes  
Family: Chloropidae  
BIN URI: BOLD:AAV6132

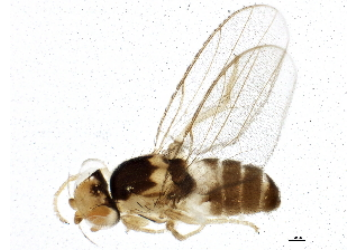

BIOUG03669-F11 [Lateral]  
Gaurax dubius  
Family: Chloropidae  
BIN URI: BOLD:ACC7744

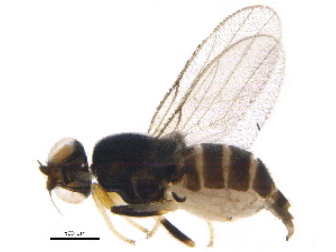

BIOUG22717-E09 [Lateral]  
Gaurax  
Family: Chloropidae  
BIN URI: BOLD:ACV4074

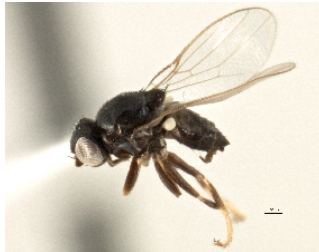

CCDB-21328-F04 [Lateral]  
Hapleginella conicola  
Family: Chloropidae  
BIN URI: BOLD:ABA7838

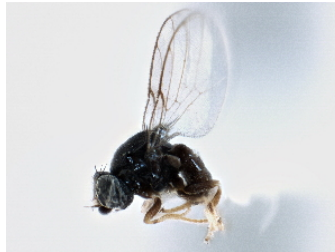

CCDB-21328-F01 [Lateral]  
Gaurax varihalteratus  
Family: Chloropidae  
BIN URI: BOLD:ACM2340

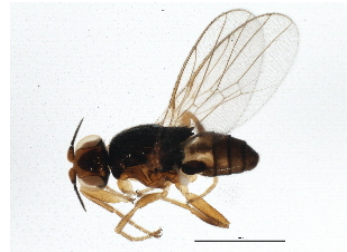

BIOUG05524-A08 [Lateral]  
Elachiptera sibirica  
Family: Chloropidae  
BIN URI: BOLD:AAH4208

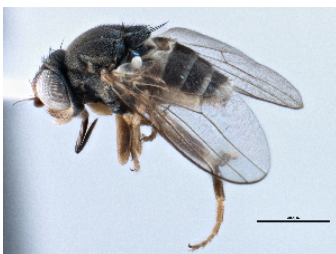

CCDB-21328-G10 [Lateral]  
Olcella provocans  
Family: Chloropidae  
BIN URI: BOLD:ABV1245

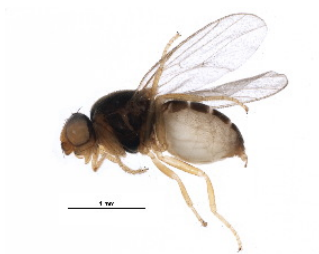

BIOUG22452-H05 [Lateral]  
Tricimba  
Family: Chloropidae  
BIN URI: BOLD:AAN5663

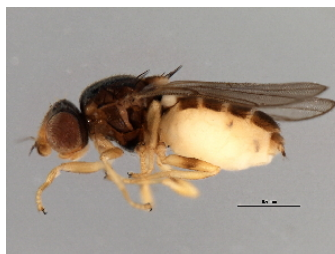

08TTML-2064 [Lateral]  
Chloropidae  
Family: Chloropidae  
BIN URI: BOLD:AAN5667

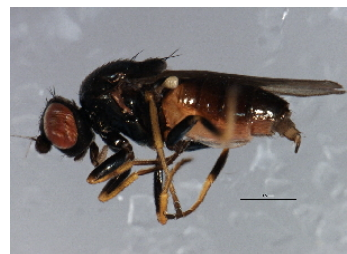

08TTML-1229 [Lateral]  
Chloropidae  
Family: Chloropidae  
BIN URI: BOLD:AAN5659

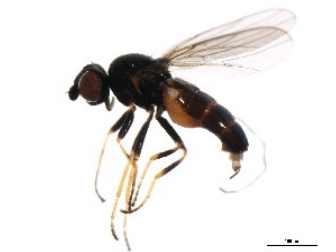

BIOUG01348-G06 [Lateral]  
Oscinella sp. TAW4  
Family: Chloropidae  
BIN URI: BOLD:AAN5665

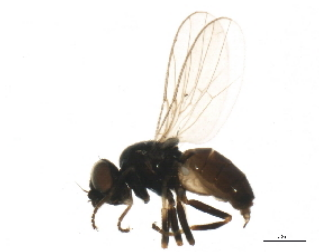

BIOUG00899-C02 [Lateral]  
Oscinella sp. TAW6  
Family: Chloropidae  
BIN URI: BOLD:AAV6112

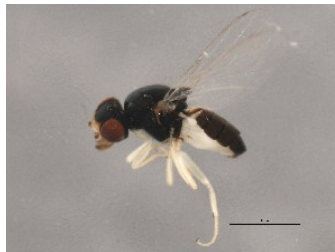

PCPP10-0953 [Lateral]  
Chloropidae  
Family: Chloropidae  
BIN URI: BOLD:AAV6114

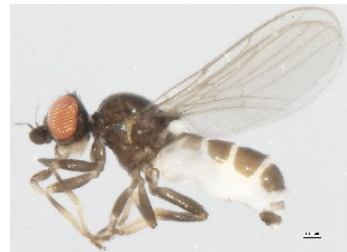

10BBDIP-1468 [Lateral]  
Oscinellinae  
Family: Chloropidae  
BIN URI: BOLD:AAH4180

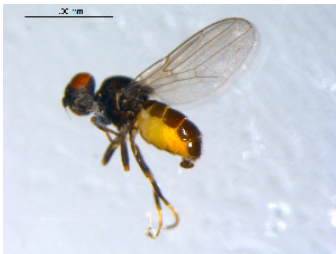

**10PROBE-09607 [Lateral]**  
*Rhopalopterum carbonarium*  
 Family: Chloropidae  
 BIN URI: BOLD:AAP3813

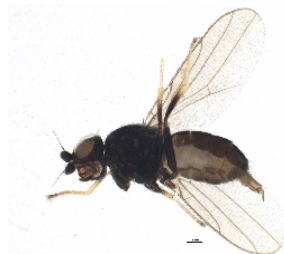

**BIOUG10401-F09 [Lateral]**  
 Oscinellinae  
 Family: Chloropidae  
 BIN URI: BOLD:AAN5662

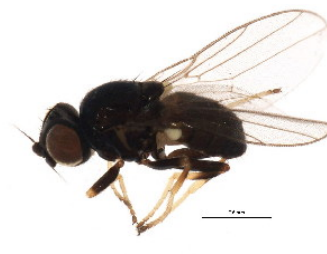

**BIOUG01400-C10 [Lateral]**  
 Chloropidae  
 Family: Chloropidae  
 BIN URI: BOLD:ABV0271

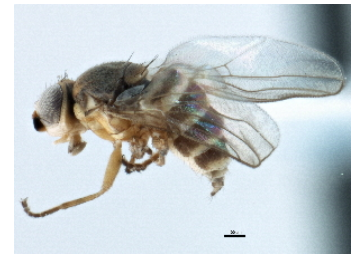

**CCDB-21328-F10 [Lateral]**  
*Incertella minor*  
 Family: Chloropidae  
 BIN URI: BOLD:AAN5660

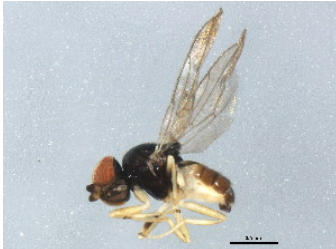

**BIOUG01835-A11 [Lateral]**  
*Incertella*  
 Family: Chloropidae  
 BIN URI: BOLD:AAG6952

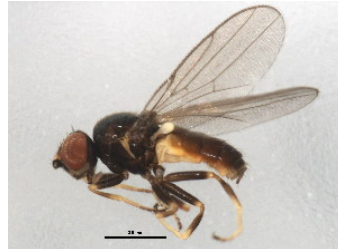

**BIOUG01460-E10 [Lateral]**  
 Chloropidae  
 Family: Chloropidae  
 BIN URI: BOLD:ABY5318

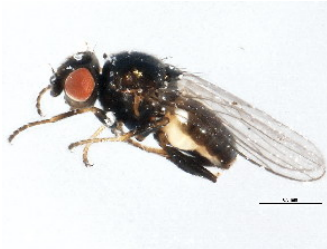

**10BBDIP-0706 [Lateral]**  
 Chloropidae  
 Family: Chloropidae  
 BIN URI: BOLD:AAH4171

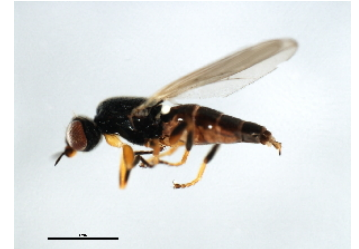

**09BBDIP-0431 [Lateral]**  
*Eribolus nana*  
 Family: Chloropidae  
 BIN URI: BOLD:AAH4175

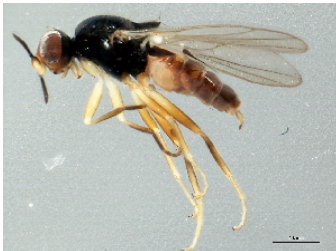

**10BBDIP-2139 [Lateral]**  
 Chloropidae  
 Family: Chloropidae  
 BIN URI: BOLD:AAP5169

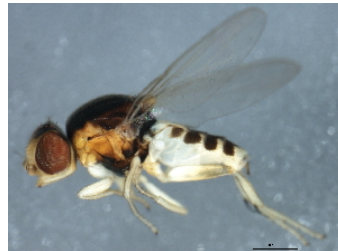

**10BBDIP-1602 [Lateral]**  
 Chloropidae  
 Family: Chloropidae  
 BIN URI: BOLD:AAH4182

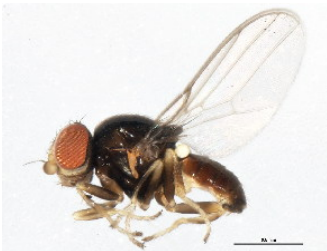

**10BBDIP-1458 [Lateral]**  
 Chloropidae  
 Family: Chloropidae  
 BIN URI: BOLD:AAP3776

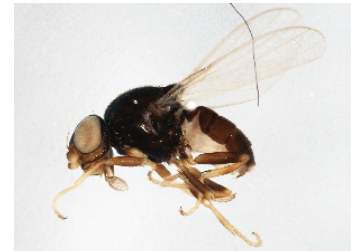

**BIOUG01620-C10 [Lateral]**  
 Chloropidae  
 Family: Chloropidae  
 BIN URI: BOLD:ABV0266

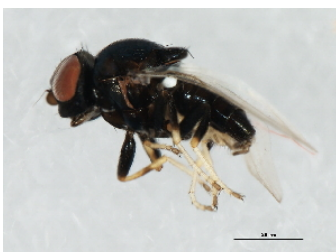

**09BBDIP-1977 [Lateral]**  
 Chloropidae  
 Family: Chloropidae  
 BIN URI: BOLD:ABZ4644

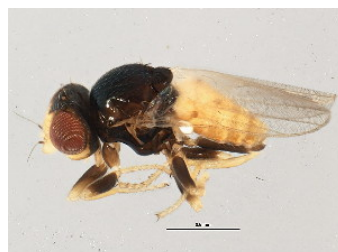

**BIOUG01543-E09 [Lateral]**  
 Chloropidae  
 Family: Chloropidae  
 BIN URI: BOLD:ABW1379

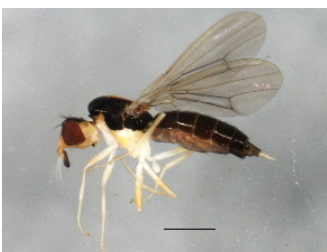

**BIOUG00825-C06 [Lateral]**  
 Psilidae  
 Family: Psilidae  
 BIN URI: BOLD:AAF9707

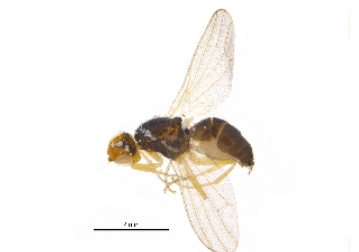

**BIOUG22581-E07 [Lateral]**  
*Psila rosae*  
 Family: Psilidae  
 BIN URI: BOLD:AAP6388

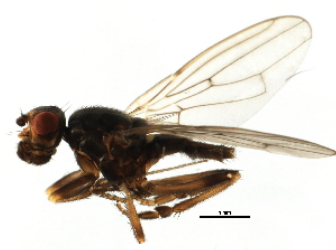

**BIOUG01475-E04 [Lateral]**  
 Sphaeroceridae  
 Family: Sphaeroceridae  
 BIN URI: BOLD:AAJ7412

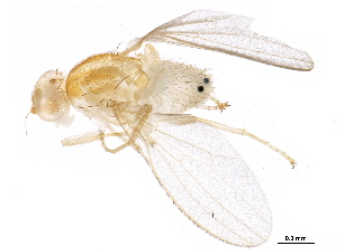

**BIOUG22733-G12 [Lateral]**  
*Gymnochiromyia concolor*  
 Family: Chyromyidae  
 BIN URI: BOLD:ACV5890

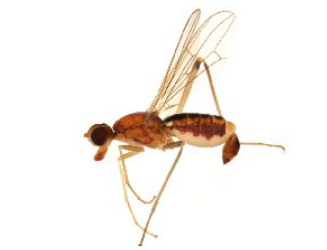

**BIOUG01427-F05 [Lateral]**  
 Micropezidae  
 Family: Micropezidae  
 BIN URI: BOLD:AAP8989

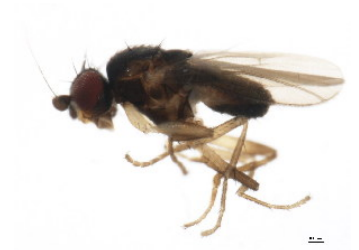

**BIOUG01343-E08 [Lateral]**  
 Sphaeroceridae  
 Family: Sphaeroceridae  
 BIN URI: BOLD:AAG7284

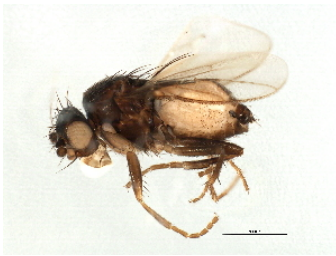

**BIOUG01587-F05 [Lateral]**  
 Sphaeroceridae  
 Family: Sphaeroceridae  
 BIN URI: BOLD:AAG7275

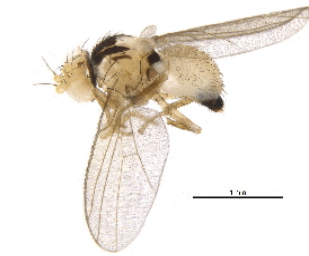

**BIOUG22719-D03 [Lateral]**  
 Phytoliriomyza  
 Family: Agromyzidae  
 BIN URI: BOLD:AAL4236

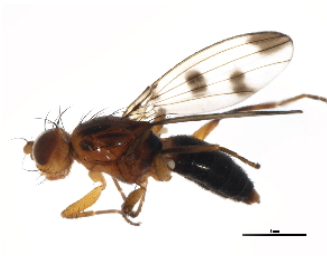

**BIOUG01544-B10 [Lateral]**  
 Opomyzidae  
 Family: Opomyzidae  
 BIN URI: BOLD:AAG3915

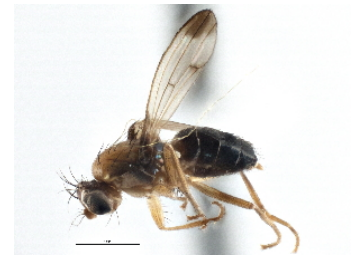

**CCDB-21320-E08 [Lateral]**  
 Geomyza apicalis  
 Family: Opomyzidae  
 BIN URI: BOLD:ACM2703

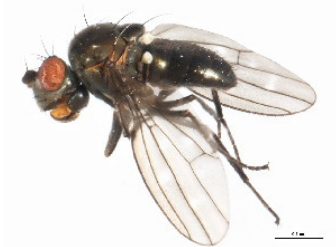

**10BBDIP-0894 [Lateral]**  
 Ephydriidae  
 Family: Ephydriidae  
 BIN URI: BOLD:AAG2738

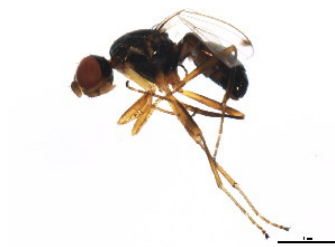

**BIOUG01336-F05 [Lateral]**  
 Sepsis punctum  
 Family: Sepsidae  
 BIN URI: BOLD:AAG5639

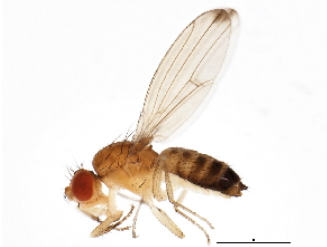

**08TTML-1004 [Lateral]**  
 Drosophilidae  
 Family: Drosophilidae  
 BIN URI: BOLD:AAG8491

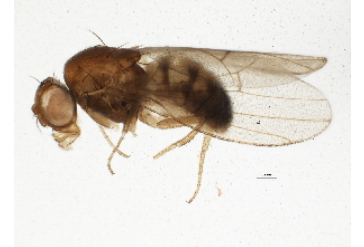

**BIOUG05509-A02 [Lateral]**  
 Drosophila putrida  
 Family: Drosophilidae  
 BIN URI: BOLD:AAF6986

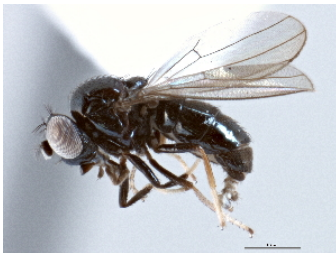

**CCDB-21412-A05 [Lateral]**  
 Athyroglossa granulosa  
 Family: Ephydriidae  
 BIN URI: BOLD:ABY0801

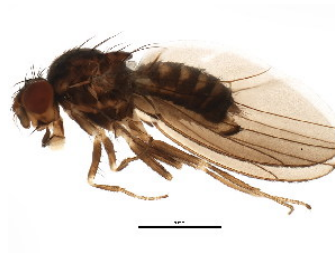

**BIOUG01426-C09 [Lateral]**  
 Drosophilidae  
 Family: Drosophilidae  
 BIN URI: BOLD:AAN5542

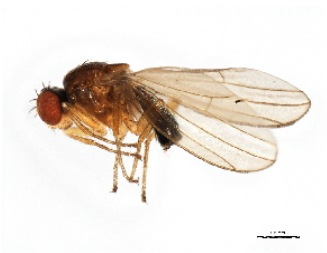

**08BBDIP-0637 [Lateral]**  
 Drosophila  
 Family: Drosophilidae  
 BIN URI: BOLD:AAG8493

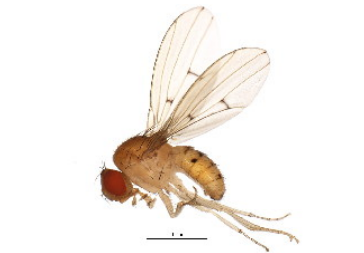

**BIOUG01352-H11 [Lateral]**  
 Drosophila falleni  
 Family: Drosophilidae  
 BIN URI: BOLD:AAB7507

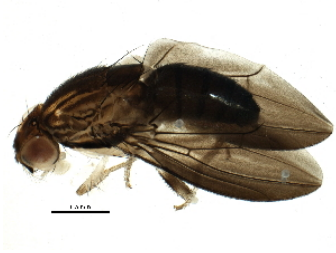

**BIOUG22462-A07 [Lateral]**  
 Stegana  
 Family: Drosophilidae  
 BIN URI: BOLD:AAN9209

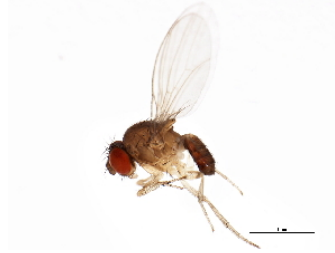

**08TTML-0991 [Lateral]**  
 Drosophilidae  
 Family: Drosophilidae  
 BIN URI: BOLD:AAB8851

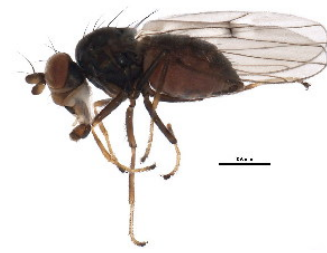

**BIOUG01360-C12 [Lateral]**  
 Philygria  
 Family: Ephydriidae  
 BIN URI: BOLD:AAG2740

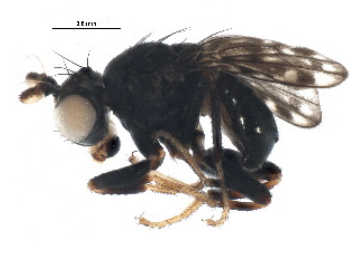

**BIOUG23078-H01 [Lateral]**  
 Ephydriidae  
 Family: Ephydriidae  
 BIN URI: BOLD:ACV4971

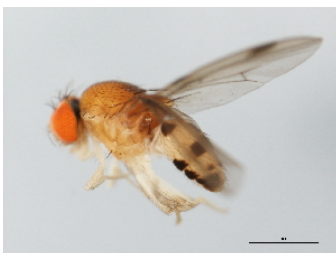

**09BBDIP-1343 [Lateral]**  
 Drosophilidae  
 Family: Drosophilidae  
 BIN URI: BOLD:AAG8500

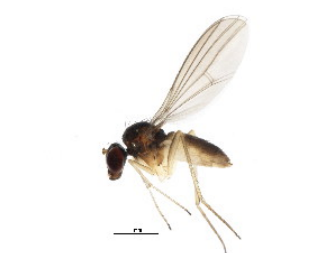

**BIOUG01338-E10 [Lateral]**  
 Dolichopodidae  
 Family: Dolichopodidae  
 BIN URI: BOLD:AAG9713

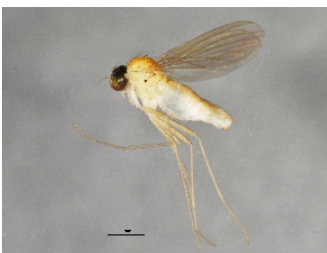

**09BBEDI-1293 [Lateral]**  
 Xanthochlorus helvinus  
 Family: Dolichopodidae  
 BIN URI: BOLD:AAG9735

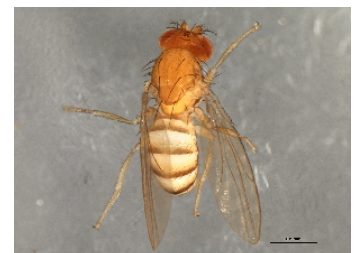

**08TTML-1669 [Dorsal]**  
 Drosophilidae  
 Family: Drosophilidae  
 BIN URI: BOLD:AAN5543

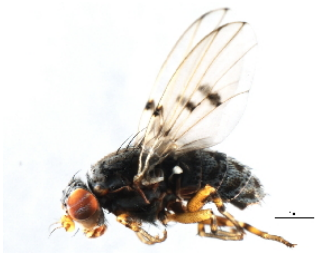

**10BBCDIP-3419 [Lateral]**  
*Odinia betulae*  
 Family: Odiniidae  
 BIN URI: BOLD:AAP8071

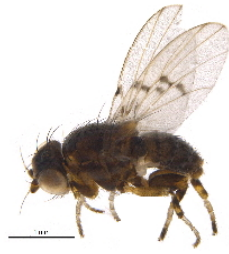

**BIOUG22323-H10 [Lateral]**  
*Odinia mejirei*  
 Family: Odiniidae  
 BIN URI: BOLD:ACV3828

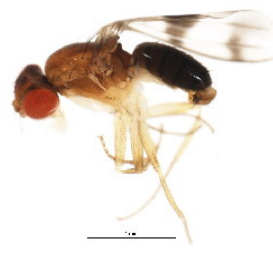

**BIOUG01345-E11 [Lateral]**  
*Chymomyza*  
 Family: Drosophilidae  
 BIN URI: BOLD:AAE2703

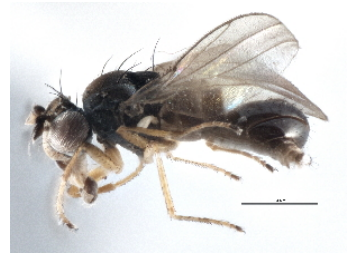

**CCDB-21410-B03 [Lateral]**  
*Nostima approximata*  
 Family: Ephyridae  
 BIN URI: BOLD:AAG2754

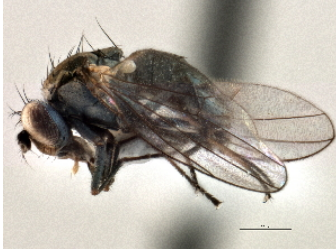

**CCDB-21412-G04 [Lateral]**  
*Hydrellia notata*  
 Family: Ephyridae  
 BIN URI: BOLD:AAG9656

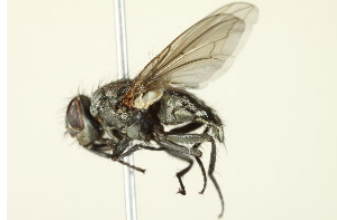

**PCPP10-0126 [Lateral]**  
*Pollenia griseotomentosa*  
 Family: Calliphoridae  
 BIN URI: BOLD:AAI2766

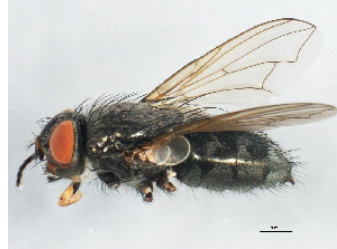

**BIOUG01143-H05 [Lateral]**  
*Pollenia labialis*  
 Family: Calliphoridae  
 BIN URI: BOLD:AAI2765

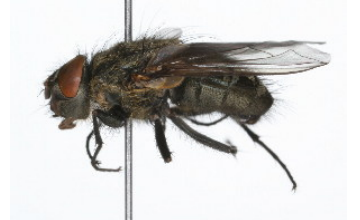

**08TTML-0587 [Lateral]**  
*Pollenia pediculata*  
 Family: Calliphoridae  
 BIN URI: BOLD:AAG6745

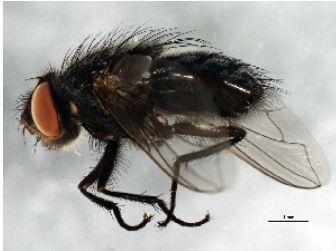

**08TTML-1727 [Lateral]**  
*Pollenia rudis*  
 Family: Calliphoridae  
 BIN URI: BOLD:AAH3035

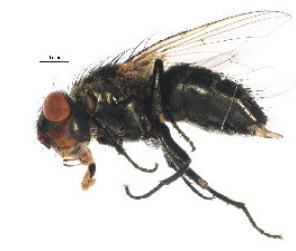

**BIOUG00855-H10 [Lateral]**  
*Pollenia rudis*  
 Family: Calliphoridae  
 BIN URI: BOLD:AAP2825

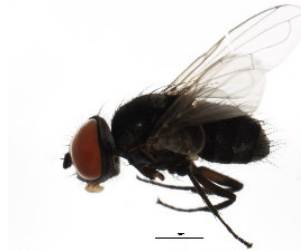

**BIOUG01344-F05 [Lateral]**  
*Strongygaster triangulifera*  
 Family: Tachinidae  
 BIN URI: BOLD:AAG2355

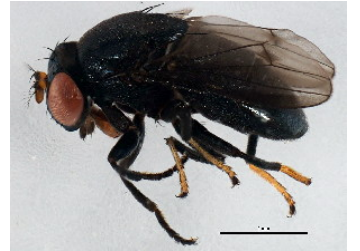

**BIOUG01408-D07 [Lateral]**  
 Ephyridae  
 Family: Ephyridae  
 BIN URI: BOLD:ABA8754

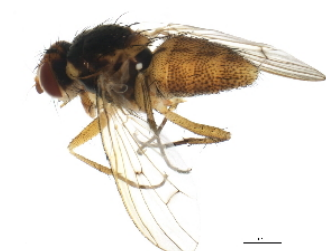

**BIOUG00892-D03 [Lateral]**  
 Anthomyiidae  
 Family: Anthomyiidae  
 BIN URI: BOLD:AAV4975

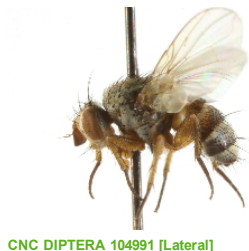

**CNC DIPTERA 104991 [Lateral]**  
*Siphona flavipes*  
 Family: Tachinidae  
 BIN URI: BOLD:AAM7892

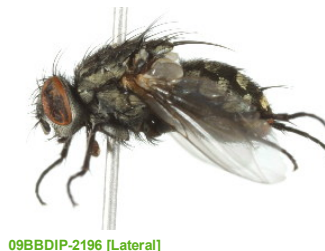

**09BBDIP-2196 [Lateral]**  
 Sarcophagidae  
 Family: Sarcophagidae  
 BIN URI: BOLD:AAA1962

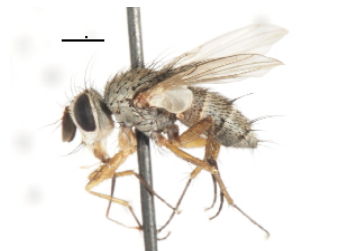

**CNC DIPTERA 105063 [Lateral]**  
*Siphona intrudens*  
 Family: Tachinidae  
 BIN URI: BOLD:AAP2721

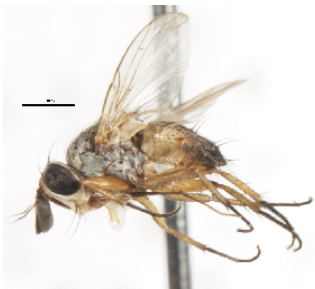

**CNC DIPTERA 105061 [Lateral]**  
*Siphona pisinnia*  
 Family: Tachinidae  
 BIN URI: BOLD:AAZ4865

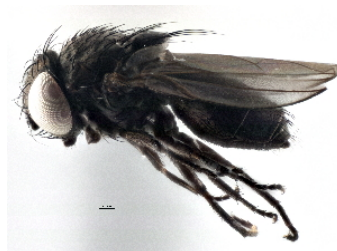

**CCDB-21327-E03 [Lateral]**  
*Pholeomyia indecora*  
 Family: Milichiidae  
 BIN URI: BOLD:AAU6554

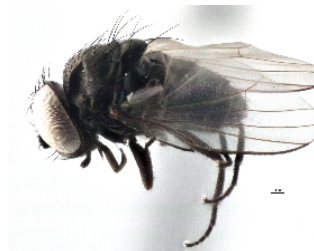

**CCDB-21327-E05 [Lateral]**  
*Pholeomyia indecora*  
 Family: Milichiidae  
 BIN URI: BOLD:AAZ5488

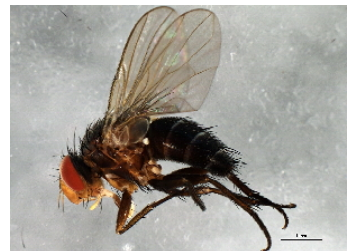

**08TTML-1948 [Lateral]**  
*Actia interrupta*  
 Family: Tachinidae  
 BIN URI: BOLD:AAB8437

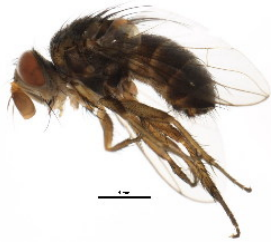

**BIOUG01344-A12 [Lateral]**  
 Ceromya  
 Family: Tachinidae  
 BIN URI: BOLD:AAP4828

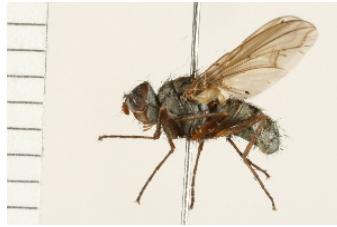

**08BBDIP-1783 [Lateral]**  
 Tachinidae  
 Family: Tachinidae  
 BIN URI: BOLD:AAG2155

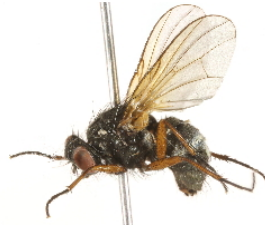

**BIOUG05440-D10 [Lateral]**  
 Mydaea urbana  
 Family: Muscidae  
 BIN URI: BOLD:ACB9959

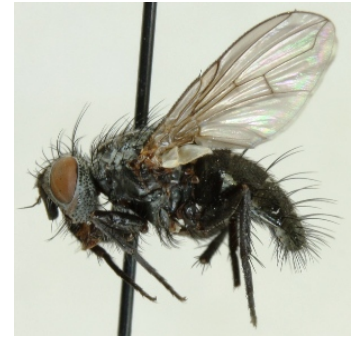

**JP00245 [Lateral]**  
 Triarthria setipennis  
 Family: Tachinidae  
 BIN URI: BOLD:ACO3992

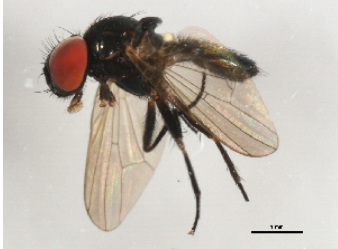

**BIOUG00866-A03 [Lateral]**  
 Fannia immaculata  
 Family: Fanniidae  
 BIN URI: BOLD:AAG4630

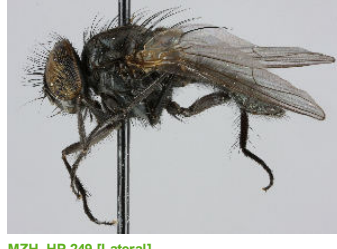

**MZH\_HP.249 [Lateral]**  
 Fannia armata  
 Family: Fanniidae  
 BIN URI: BOLD:AAU6630

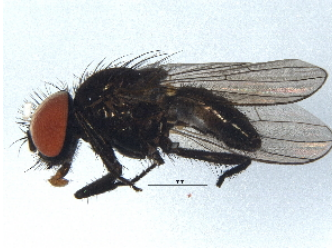

**BIOUG03097-E07 [Lateral]**  
 Fannia  
 Family: Fanniidae  
 BIN URI: BOLD:ACC1224

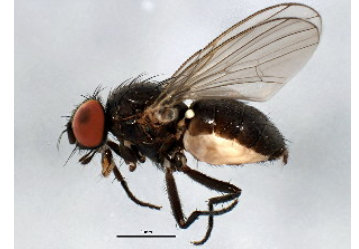

**BIOUG01422-C10 [Lateral]**  
 Fanniidae  
 Family: Fanniidae  
 BIN URI: BOLD:AAG6810

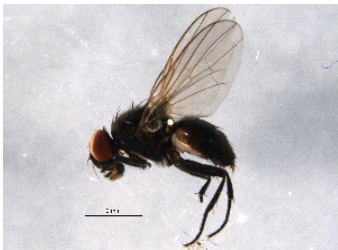

**BIOUG04877-A07 [Lateral]**  
 Fanniidae  
 Family: Fanniidae  
 BIN URI: BOLD:ACF8801

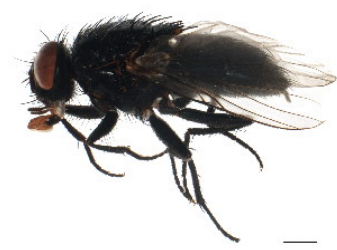

**BIOUG01347-H02 [Lateral]**  
 Muscina levida  
 Family: Muscidae  
 BIN URI: BOLD:AAB8817

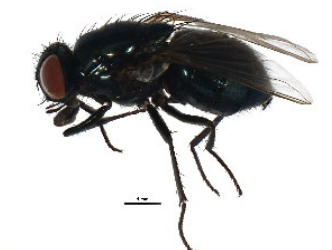

**BIOUG01349-F02 [Lateral]**  
 Eudasiphora  
 Family: Muscidae  
 BIN URI: BOLD:AAG6757

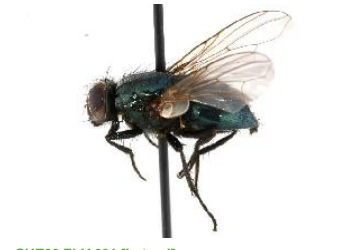

**GUE06-FLY-091 [Lateral]**  
 Diptera  
 BIN URI: BOLD:ABZ1424

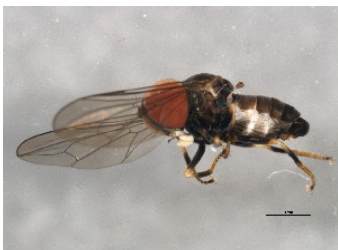

**10BBCDIP-0562 [Lateral]**  
 Eudorylas alternatus  
 Family: Pipunculidae  
 BIN URI: BOLD:AAF1875

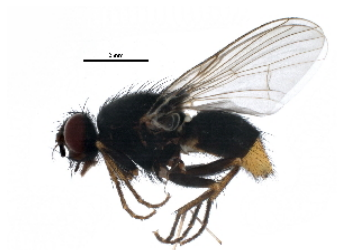

**BIOUG21873-E07 [Lateral]**  
 Muscidae  
 Family: Muscidae  
 BIN URI: BOLD:ACV4140

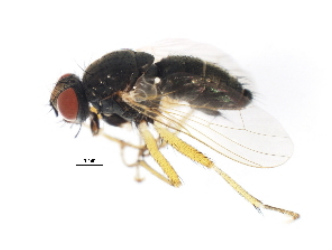

**10JSROW-1465 [Lateral]**  
 Macrochis ausoba  
 Family: Muscidae  
 BIN URI: BOLD:AAG1701

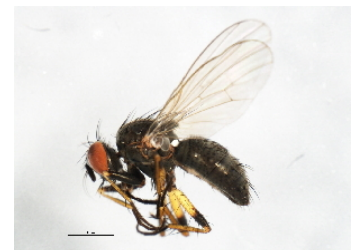

**09BBDIP-0721 [Lateral]**  
 Coenosia  
 Family: Muscidae  
 BIN URI: BOLD:AAG1741



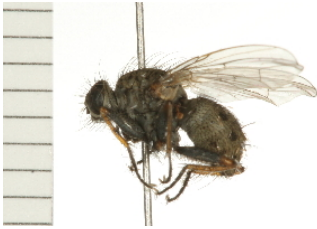

**08OEC-121 [Lateral]**  
*Coenosia tigrina*  
 Family: Muscidae  
 BIN URI: BOLD:AAB5609

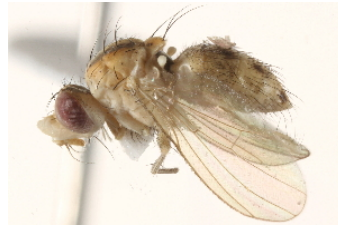

**BIOUG03689-F10 [Lateral]**  
*Coenosia*  
 Family: Muscidae  
 BIN URI: BOLD:AAG1759

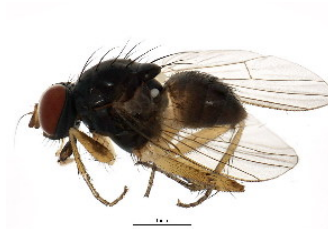

**BIOUG01364-F10 [Lateral]**  
*Coenosia*  
 Family: Muscidae  
 BIN URI: BOLD:AAG1769

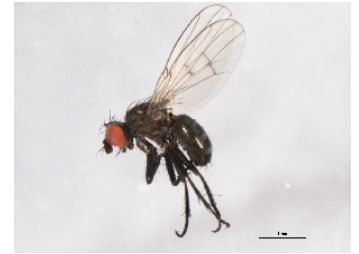

**08BBDIP-2622 [Lateral]**  
*Schoenomyza*  
 Family: Muscidae  
 BIN URI: BOLD:AAG4622

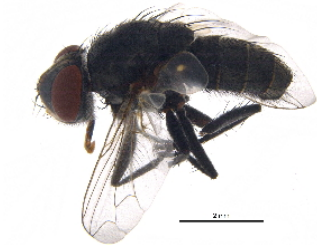

**BIOUG22325-H02 [Lateral]**  
*Senotainia trilineata*  
 Family: Sarcophagidae  
 BIN URI: BOLD:AAG6744

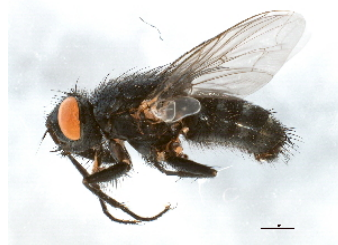

**BIOUG01639-B12 [Lateral]**  
 Sarcophagidae  
 Family: Sarcophagidae  
 BIN URI: BOLD:ABV1243

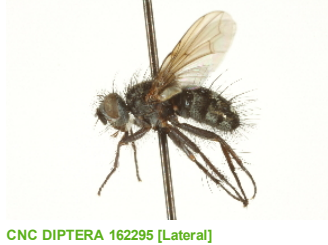

**CNC DIPTERA 162295 [Lateral]**  
*Lypha fumipennis*  
 Family: Tachinidae  
 BIN URI: BOLD:AAF6259

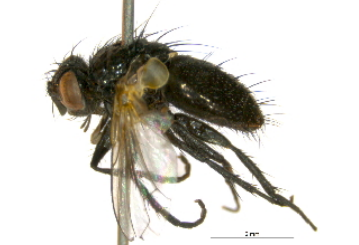

**BIOUG04342-F09 [Lateral]**  
*Lydina americana*  
 Family: Tachinidae  
 BIN URI: BOLD:AAG2432

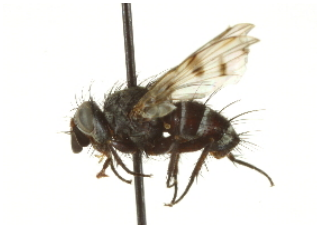

**CNC DIPTERA 162267 [Lateral]**  
*Homalactia harringtoni*  
 Family: Tachinidae  
 BIN URI: BOLD:AAP2717

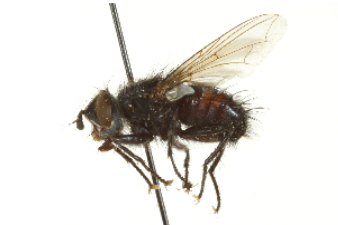

**CNC DIPTERA 162146 [Lateral]**  
*Panzeria arcuata*  
 Family: Tachinidae  
 BIN URI: BOLD:ABX8463

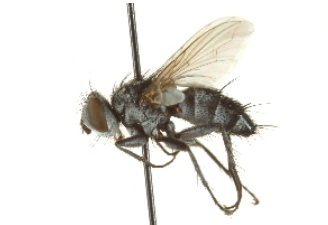

**CNC DIPTERA 162002 [Lateral]**  
*Ceracia dentata*  
 Family: Tachinidae  
 BIN URI: BOLD:ABX6290

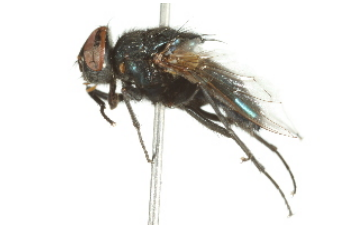

**10BBDIP-0331 [Lateral]**  
*Phormia regina*  
 Family: Calliphoridae  
 BIN URI: BOLD:AAB9140

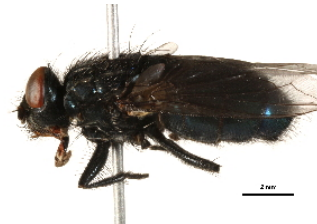

**BIOUG04921-F06 [Lateral]**  
*Protocalliphora tundrae*  
 Family: Calliphoridae  
 BIN URI: BOLD:AAH3037

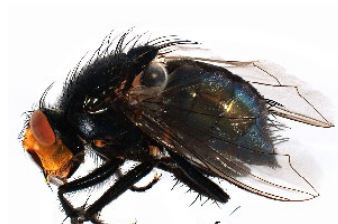

**BIOUG01914-B10 [Lateral]**  
*Cynomya mortuorum*  
 Family: Calliphoridae  
 BIN URI: BOLD:AAB0868

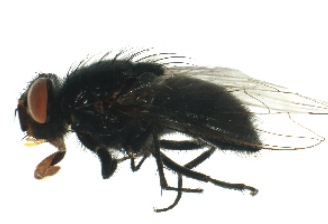

**BIOUG01347-H08 [Lateral]**  
*Calliphora livida*  
 Family: Calliphoridae  
 BIN URI: BOLD:ABY7153

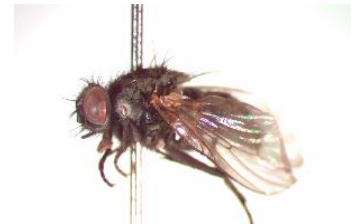

**BUIC-CHU0556 [Lateral]**  
*Myospila mediatubunda*  
 Family: Muscidae  
 BIN URI: BOLD:AAD7145

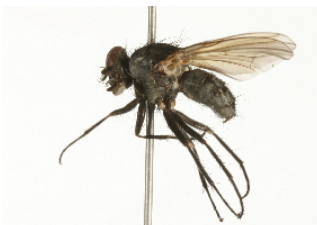

**08TTML-0524 [Lateral]**  
 Anthomyiidae  
 Family: Anthomyiidae  
 BIN URI: BOLD:AAG1712

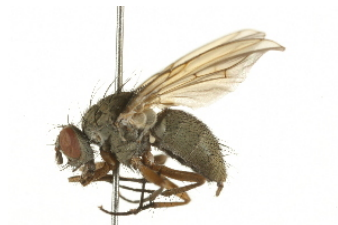

**08TTML-0730 [Lateral]**  
*Helina depuncta*  
 Family: Muscidae  
 BIN URI: BOLD:AAG1711

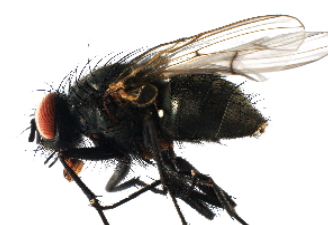

**BIOUG01392-A04 [Lateral]**  
*Helina evecta*  
 Family: Muscidae  
 BIN URI: BOLD:AAC2498

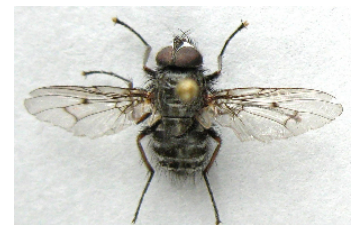

**BIOUG06723-H08 [Dorsal]**  
 Diptera  
 BIN URI: BOLD:AAG1742

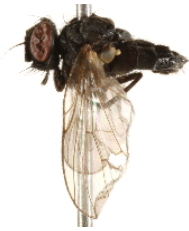

**BIOUG13659-F08 [Lateral]**  
 Phaonia  
 Family: Muscidae  
 BIN URI: BOLD: AAP2512

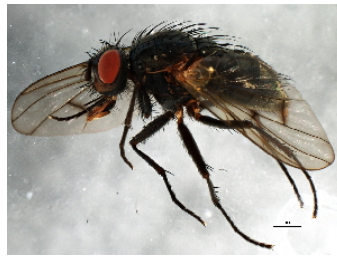

**08TTML-1945 [Lateral]**  
 Phaonia  
 Family: Muscidae  
 BIN URI: BOLD: AAM9107

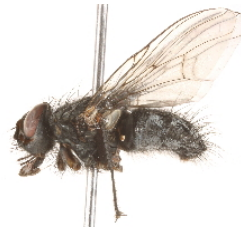

**BIOUG13061-A02 [Lateral]**  
 Phaonia  
 Family: Muscidae  
 BIN URI: BOLD: ABU9891

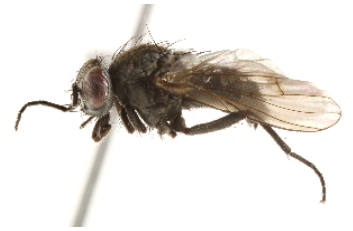

**BIOUG04288-G12 [Lateral]**  
 Phaonia  
 Family: Muscidae  
 BIN URI: BOLD: ABV1241

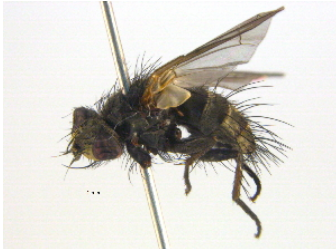

**BIOUG03215-D01 [Lateral]**  
 Blepharomyia pagana  
 Family: Tachinidae  
 BIN URI: BOLD: AAV0903

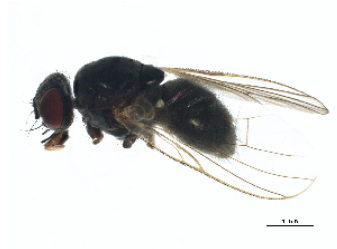

**BIOUG16073-D03 [Lateral]**  
 Spilogona  
 Family: Muscidae  
 BIN URI: BOLD: ACP7541

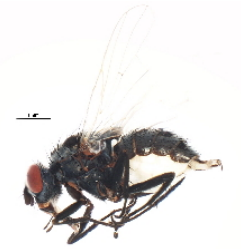

**10JSROW-1443 [Lateral]**  
 Anthomyia pluvialis  
 Family: Anthomyiidae  
 BIN URI: BOLD: AAP2970

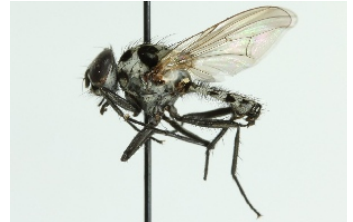

**MZH\_HP.437 [Lateral]**  
 Anthomyia pluvialis  
 Family: Anthomyiidae  
 BIN URI: BOLD: AAQ0583

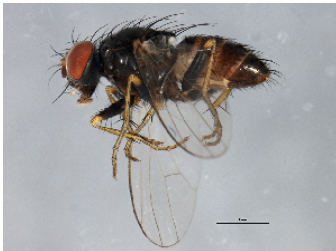

**08TTML-1053 [Lateral]**  
 Lispocephala erythrocerata  
 Family: Muscidae  
 BIN URI: BOLD: AAG1704

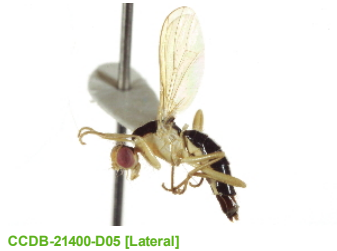

**CCDB-21400-D05 [Lateral]**  
 Cordilura gracilipes  
 Family: Scathophagidae  
 BIN URI: BOLD: AAH4229

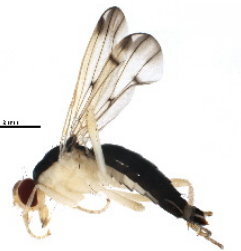

**BIOUG21873-G07 [Lateral]**  
 Cordilura  
 Family: Scathophagidae  
 BIN URI: BOLD: AAH4225

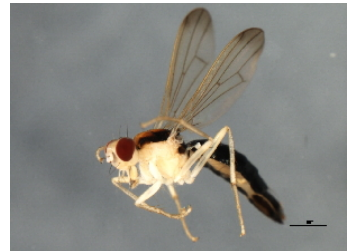

**09BBEDI-1932 [Lateral]**  
 Scathophagidae  
 Family: Scathophagidae  
 BIN URI: BOLD: AAH4236

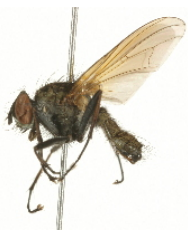

**08TTML-0739 [Lateral]**  
 Anthomyiidae  
 Family: Anthomyiidae  
 BIN URI: BOLD: AAG2460

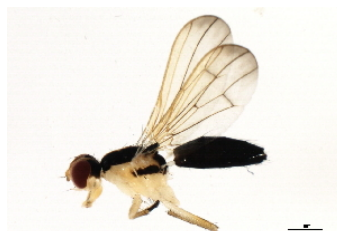

**09BBEDI-1899 [Lateral]**  
 Americina adusta  
 Family: Scathophagidae  
 BIN URI: BOLD: AAH4235

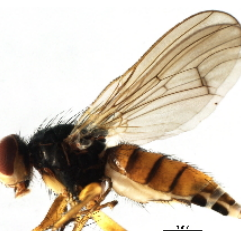

**BIOUG01475-E01 [Lateral]**  
 Anthomyiidae  
 Family: Anthomyiidae  
 BIN URI: BOLD: ABW1307

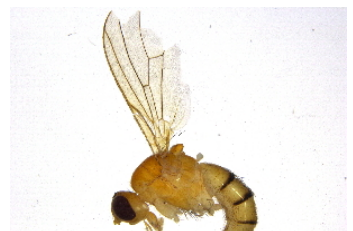

**BIOUG04331-A07 [Lateral]**  
 Scathophagidae  
 Family: Scathophagidae  
 BIN URI: BOLD: ACM2222

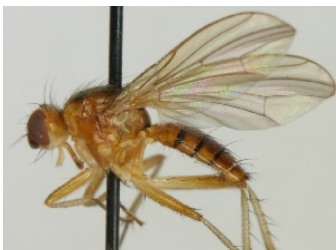

**[jka10-00851 [Lateral]**  
 Megaphthalma pallida

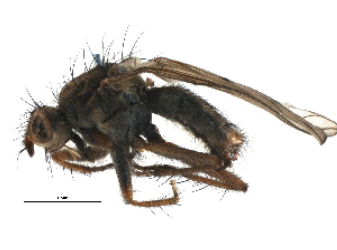

**BIOUG08898-F10 [Lateral]**  
 Scathophaga furcata  
 Family: Scathophagidae  
 BIN URI: BOLD: AAH0022

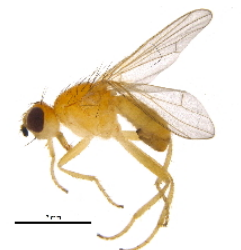

**BIOUG22241-E12 [Lateral]**  
 Scathophaga  
 Family: Scathophagidae  
 BIN URI: BOLD: ACU9724

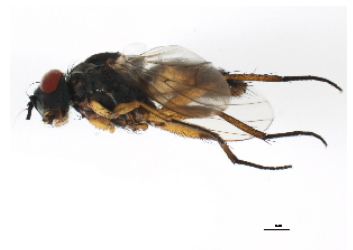

**BIOUG01373-A10 [Lateral]**  
 Anthomyiidae  
 Family: Anthomyiidae  
 BIN URI: BOLD: AAG2513

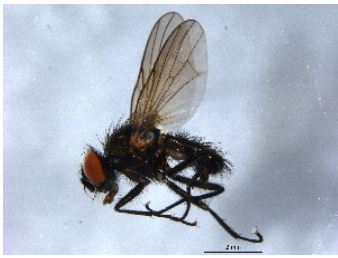

**BIOUG03018-C05 [Lateral]**  
Anthomyiidae  
Family: Anthomyiidae  
BIN URI: BOLD:AAP8831

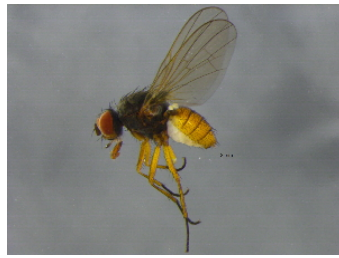

**BIOUG03381-H10 [Lateral]**  
Anthomyiidae  
Family: Anthomyiidae  
BIN URI: BOLD:AAG2479

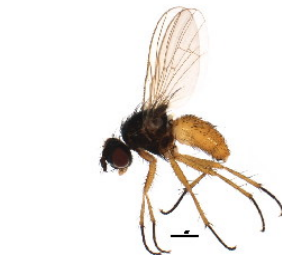

**BIOUG01411-C06 [Lateral]**  
Anthomyiidae  
Family: Anthomyiidae  
BIN URI: BOLD:AAN5497

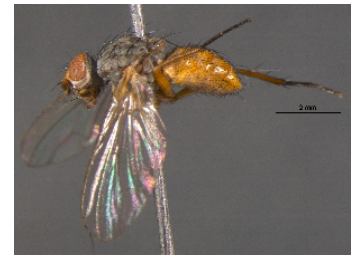

**BIOUG03400-H08 [Lateral]**  
Pegomya  
Family: Anthomyiidae  
BIN URI: BOLD:ACB2221

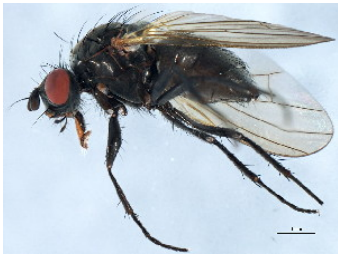

**10JSROW-0273 [Lateral]**  
Anthomyiidae  
Family: Anthomyiidae  
BIN URI: BOLD:AAP2968

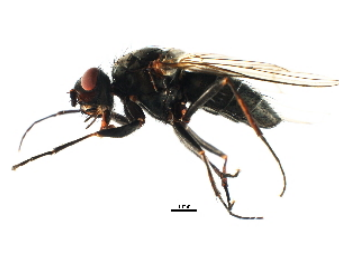

**BIOUG01475-C02 [Lateral]**  
Anthomyiidae  
Family: Anthomyiidae  
BIN URI: BOLD:AAP2967

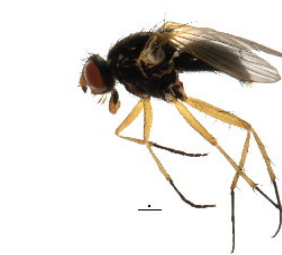

**BIOUG01344-F01 [Lateral]**  
Anthomyiidae  
Family: Anthomyiidae  
BIN URI: BOLD:ABW1309

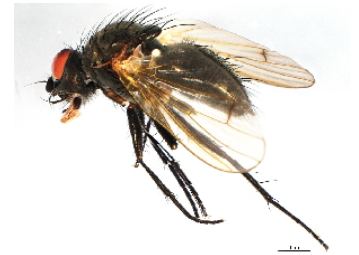

**10PHMAL-0954 [Lateral]**  
Anthomyiidae  
Family: Anthomyiidae  
BIN URI: BOLD:AAM7339

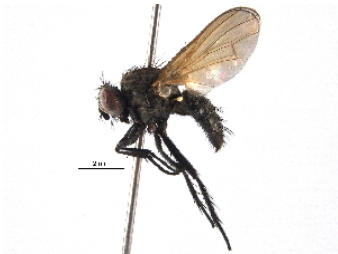

**BIOUG10177-C10 [Lateral]**  
Anthomyiidae  
Family: Anthomyiidae  
BIN URI: BOLD:ACL8023

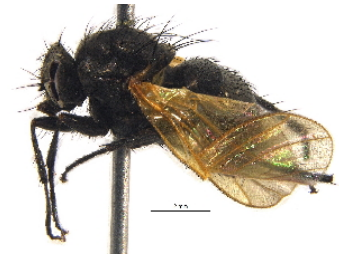

**BIOUG13702-F04 [Lateral]**  
Anthomyiidae  
Family: Anthomyiidae  
BIN URI: BOLD:ACP3345

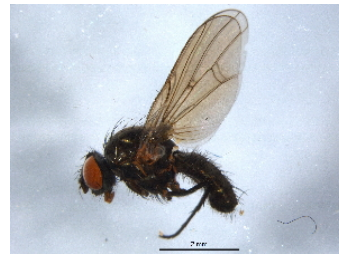

**BIOUG02989-F07 [Lateral]**  
Hylemya  
Family: Anthomyiidae  
BIN URI: BOLD:ABW2407

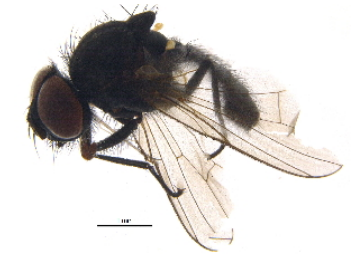

**BIOUG22325-A12 [Lateral]**  
Lasiomma  
Family: Anthomyiidae  
BIN URI: BOLD:AAL7525

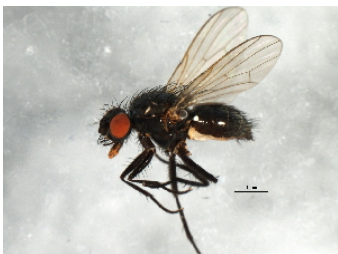

**08TTML-1946 [Lateral]**  
Anthomyiidae  
Family: Anthomyiidae  
BIN URI: BOLD:AAG2463

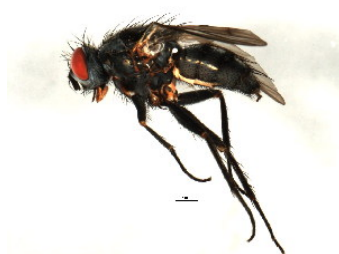

**BIOUG00938-F04 [Lateral]**  
Anthomyiidae  
Family: Anthomyiidae  
BIN URI: BOLD:AAP8833

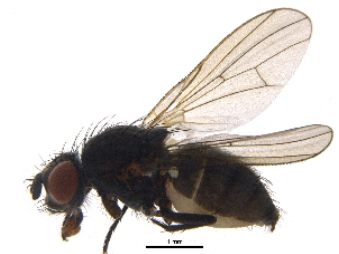

**BIOUG22325-A03 [Lateral]**  
Delia  
Family: Anthomyiidae  
BIN URI: BOLD:AAP2973

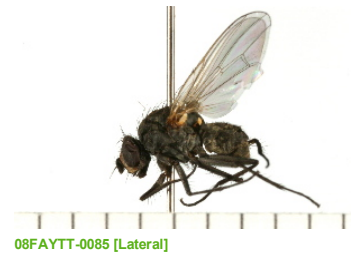

**08FAYTT-0085 [Lateral]**  
Delia florilega  
Family: Anthomyiidae  
BIN URI: BOLD:ACR4394

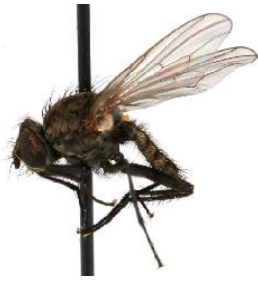

GUE06-FLY-069 [Lateral]  
Diptera

BIN URI: BOLD:AAA3453

IMAGE NOT AVAILABLE

BIOUG22843-D03  
*Delia antiqua*  
Family: Anthomyiidae

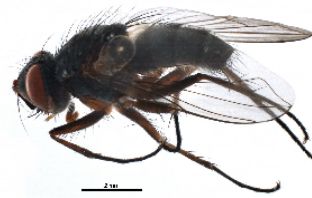

BIOUG21873-D07 [Lateral]  
*Cryptomeigenia*  
Family: Tachinidae  
BIN URI: BOLD:AAG2128

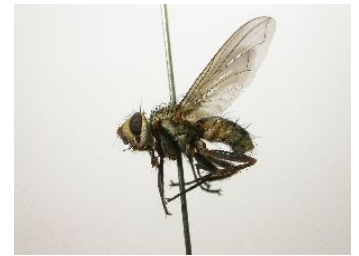

Haber 000797 [Lateral]  
*Cryptomeigenia*  
Family: Tachinidae  
BIN URI: BOLD:ABZ1975

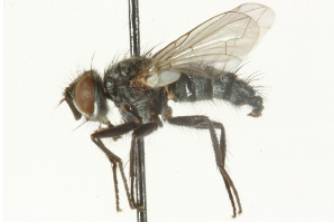

CNC DIPTERA 104565 [Lateral]  
*Oswaldia minor*  
Family: Tachinidae  
BIN URI: BOLD:ACF1129

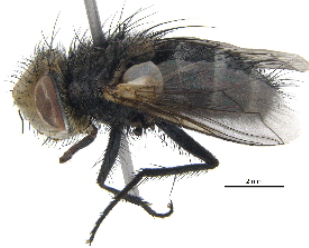

BIOUG21607-B12 [Lateral]  
*Gonia*  
Family: Tachinidae  
BIN URI: BOLD:ACF7092

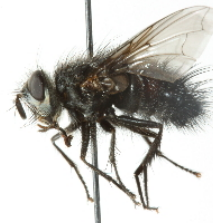

CNC DIPTERA 103928 [Lateral]  
*Leschenaultia exul*  
Family: Tachinidae  
BIN URI: BOLD:ACE2864

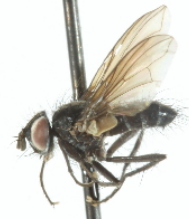

CNC DIPTERA 104287 [Lateral]  
*Medina barbata*  
Family: Tachinidae  
BIN URI: BOLD:AAG6902

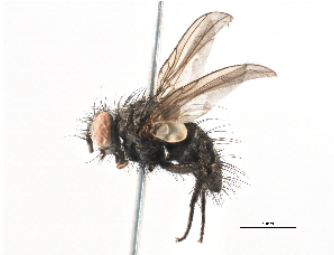

BIOUG08956-F01 [Lateral]  
*Eucelatoria*  
Family: Tachinidae  
BIN URI: BOLD:ACG6047

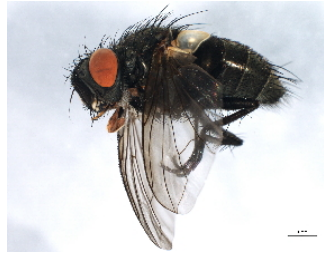

BIOUG01544-B02 [Lateral]  
Tachinidae  
Family: Tachinidae  
BIN URI: BOLD:AAG2348

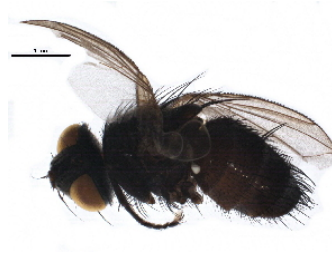

BIOUG24012-E10 [Lateral]  
*Lixophaga*  
Family: Tachinidae

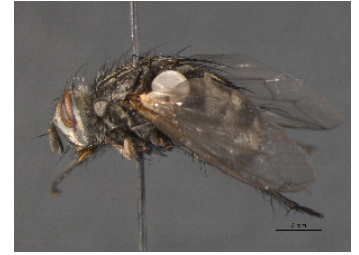

BIOUG05615-E11 [Lateral]  
*Phorocera*  
Family: Tachinidae  
BIN URI: BOLD:AAG2146

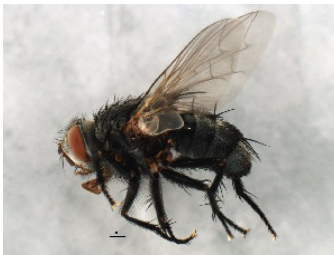

BIOUG01427-G04 [Lateral]  
Tachinidae  
Family: Tachinidae  
BIN URI: BOLD:AAP8654

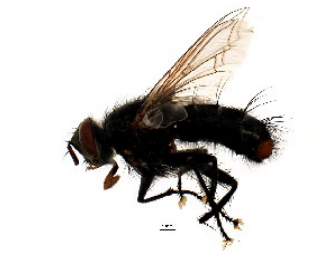

BIOUG00992-E09 [Lateral]  
*Phorocera obscura*  
Family: Tachinidae  
BIN URI: BOLD:ABY8575

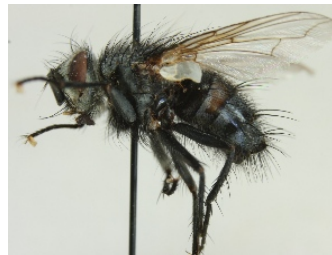

JP00114 [Lateral]  
*Parasetigena silvestris*  
Family: Tachinidae  
BIN URI: BOLD:ABV1657

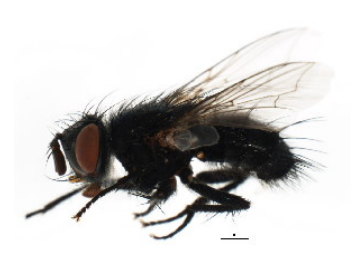

BIOUG01344-H01 [Lateral]  
*Phorocera obscura*  
Family: Tachinidae  
BIN URI: BOLD:AAP4830

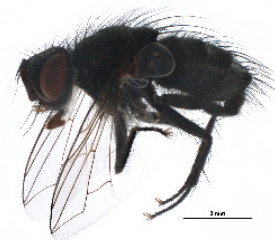

BIOUG21873-C06 [Lateral]  
Tachinidae  
Family: Tachinidae  
BIN URI: BOLD:ACV4527

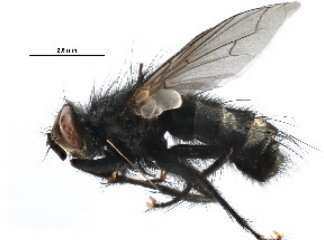

BIOUG22360-E02 [Lateral]  
*Exoristinae*  
Family: Tachinidae  
BIN URI: BOLD:ACQ2060

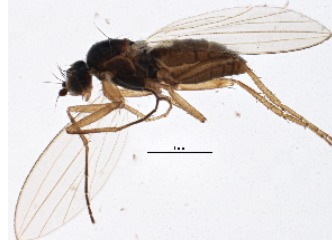

BIOUG05636-E02 [Lateral]  
*Lonchoptera bifurcata*  
Family: Lonchopteridae  
BIN URI: BOLD:AAG9974

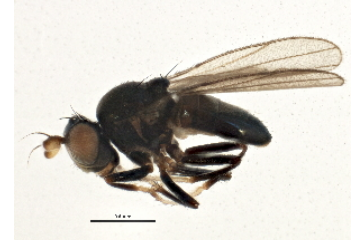

BIOUG05535-E10 [Lateral]  
*Ephydriidae*  
Family: Ephydriidae  
BIN URI: BOLD:ABX2181

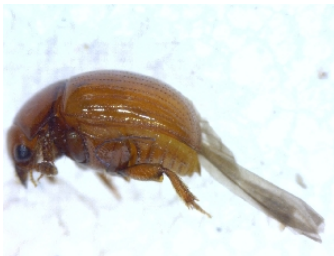

**BIOUG01043\_D05 [Lateral]**  
 Leiodidae  
 Family: Leiodidae  
 BIN URI: BOLD:ABA6310

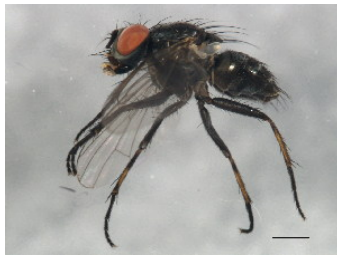

**10BBCDIP-1257 [Lateral]**  
 Lispe albitarsis  
 Family: Muscidae  
 BIN URI: BOLD:AAP1125

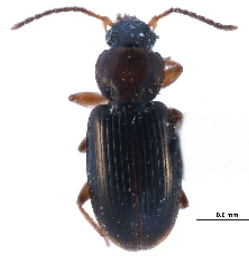

**CCDB-23051-F10 [Dorsal]**  
 Bradycellus neglectus  
 Family: Carabidae  
 BIN URI: BOLD:AAE3092

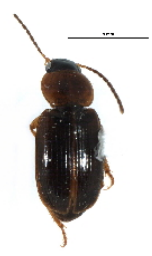

**CCDB-22962-B11 [Dorsal]**  
 Stenolophus conjunctus  
 Family: Carabidae  
 BIN URI: BOLD:AAE9008

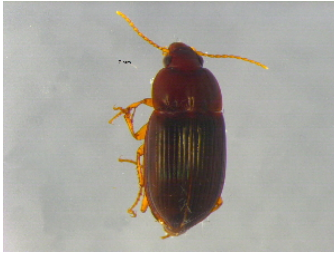

**BIOUG03138-C03 [Dorsal]**  
 Amara rubrica  
 Family: Carabidae  
 BIN URI: BOLD:AAM7658

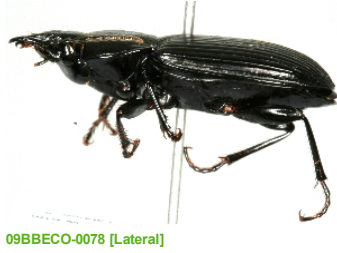

**09BBECO-0078 [Lateral]**  
 Pterostichus melanarius  
 Family: Carabidae  
 BIN URI: BOLD:AAC0661

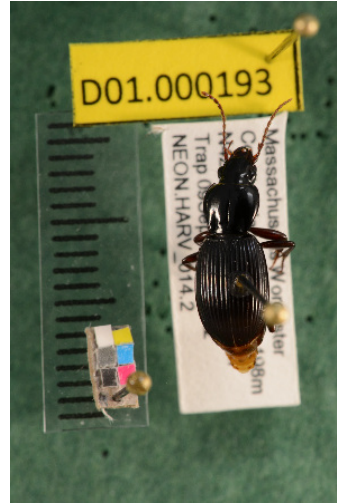

**D01.000193 [Dorsal]**  
 Carabidae D01morph\_B  
 Family: Carabidae  
 BIN URI: BOLD:AA6180

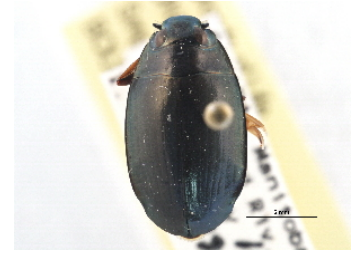

**CCDB-21430-F05 [Dorsal]**  
 Dineutus assimilis  
 Family: Gyridae  
 BIN URI: BOLD:ABX0920

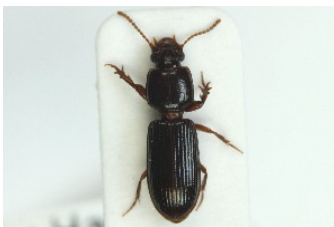

**ZMUO.000458 [Dorsal]**  
 Clivina fessor  
 Family: Carabidae  
 BIN URI: BOLD:AAH0274

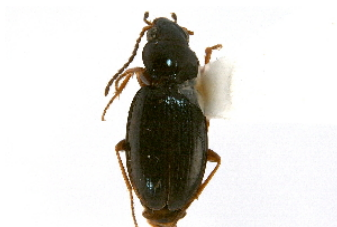

**CCDB-21405-D12 [Dorsal]**  
 Bembidion obtusum  
 Family: Carabidae  
 BIN URI: BOLD:AAP9490

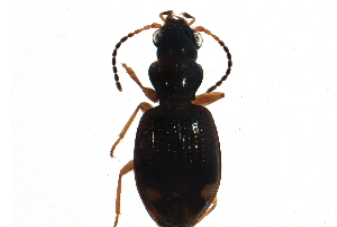

**BIOUG21883-E04 [Dorsal]**  
 Bembidion frontale  
 Family: Carabidae  
 BIN URI: BOLD:AAU7150

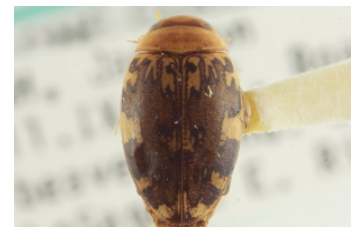

**CNC COLEO 00252387 [Dorsal]**  
 Laccophilus maculosus maculosus  
 Family: Dytiscidae  
 BIN URI: BOLD:AAH0221

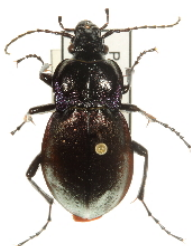

**CNC COLEO 00119446 [Dorsal]**

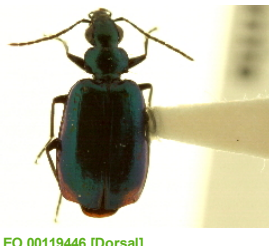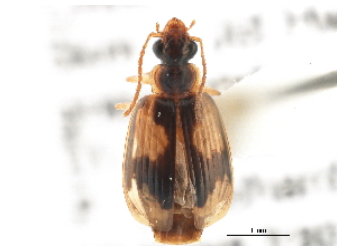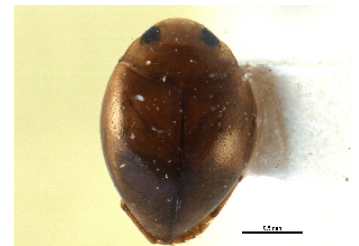

**BIOUG09887-A03 [Dorsal]**  
Carabus  
Family: Carabidae  
BIN URI: BOLD:AAH2826

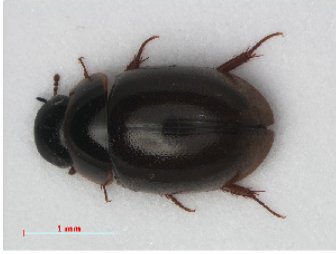

*Lebia viridis*  
Family: Carabidae  
BIN URI: BOLD:AAH0141

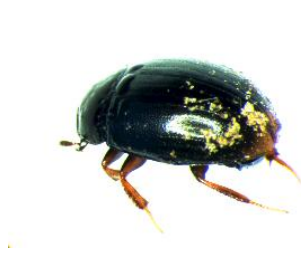

**CCDB-21430-B11 [Dorsal]**  
*Lebia fasciata*  
Family: Carabidae  
BIN URI: BOLD:AAH0212

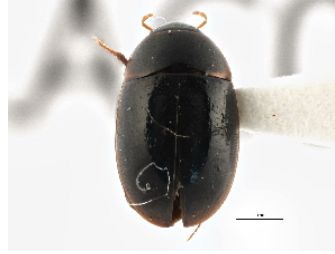

**CCDB-21428-G12 [Dorsal]**  
*Desmopachria convexa*  
Family: Dytiscidae  
BIN URI: BOLD:ACO4071

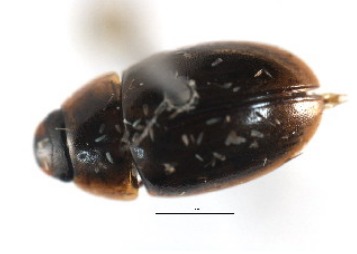

**RMNH.INS.536361 [Dorsal]**  
*Anacaena lutescens*  
Family: Hydrophilidae  
BIN URI: BOLD:AAF4596

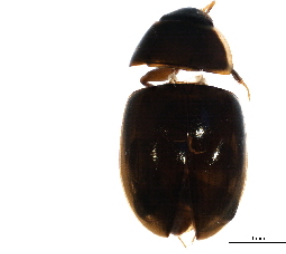

**GBOL\_Col\_FK\_8339 [Lateral]**  
*Cercyon haemorrhoidalis*  
Family: Hydrophilidae  
BIN URI: BOLD:ABV1545

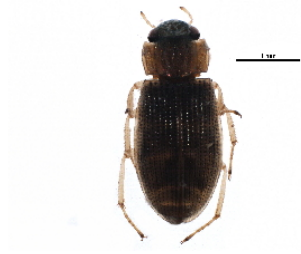

**BIOUG09883-A12 [Dorsal]**  
*Cymbiodyta vindicata*  
Family: Hydrophilidae  
BIN URI: BOLD:ACM5968

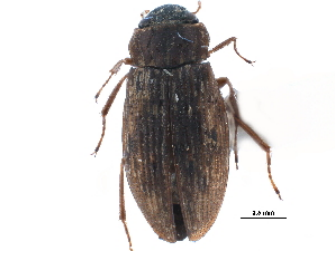

**08SOCOL-0247 [Dorsal]**  
*Enochrus ochraceus*  
Family: Hydrophilidae  
BIN URI: BOLD:AAH2910

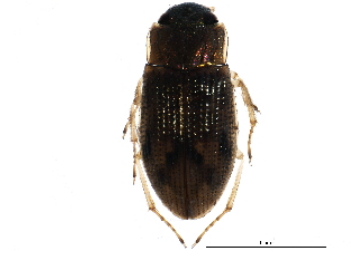

**BIOUG24040-H03 [Dorsal]**  
*Enochrus*  
Family: Hydrophilidae

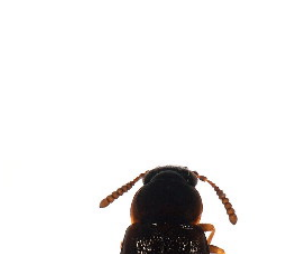

**BIOUG24027-A05 [Dorsal]**  
*Helophorinae*  
Family: Hydrophilidae

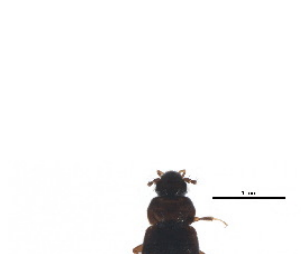

**CCDB-23054-F03 [Dorsal]**  
*Helophorus lacustris*  
Family: Hydrophilidae  
BIN URI: BOLD:ACR8815

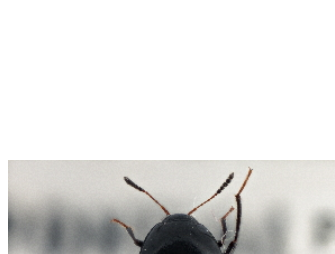

**BIOUG24040-H09 [Dorsal]**  
*Hydrophilidae*  
Family: Hydrophilidae

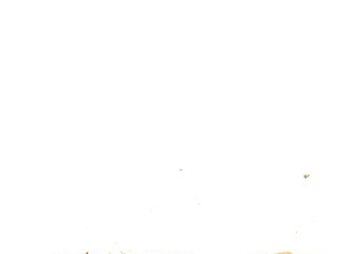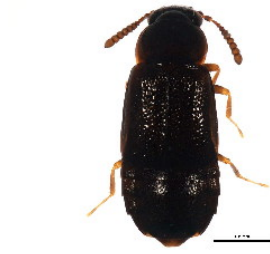

**BIOUG01144-B06 [Dorsal]**  
*Phyllodrepa*  
Family: Staphylinidae  
BIN URI: BOLD:ABW5502

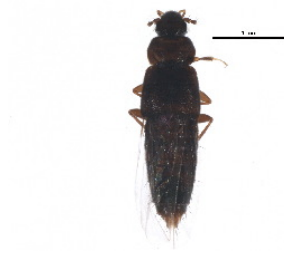

**BIOUG22867-A07 [Dorsal]**  
*Trichophya pilicomis*  
Family: Staphylinidae  
BIN URI: BOLD:ABW9580

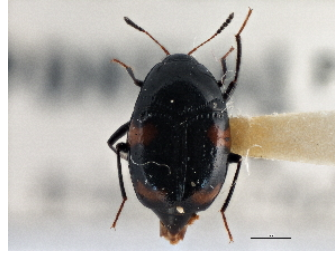

**CNC COLEO 00162916 [Dorsal]**  
*Scaphidium quadriguttatum*  
Family: Staphylinidae  
BIN URI: BOLD:ACP0011

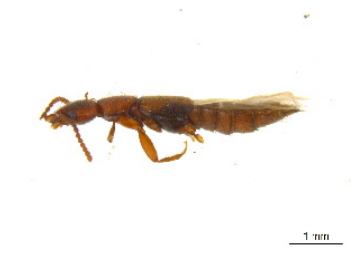

**BIOUG06758-E02 [Lateral]**  
*Staphylinidae*  
Family: Staphylinidae  
BIN URI: BOLD:AAY6538

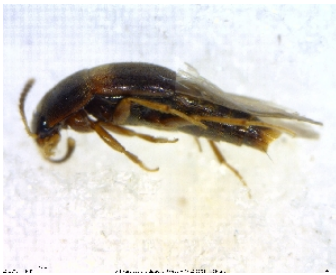

**BIOUG02612-B07 [Lateral]**  
*Staphylinidae*  
Family: Staphylinidae  
BIN URI: BOLD:ACC1294

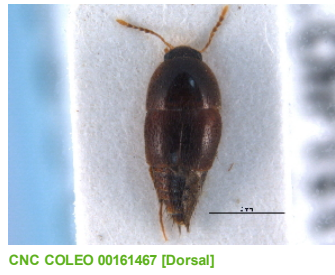

**CNC COLEO 00161467 [Dorsal]**  
*Sepedophilus versicolor*  
Family: Staphylinidae  
BIN URI: BOLD:AAP6950

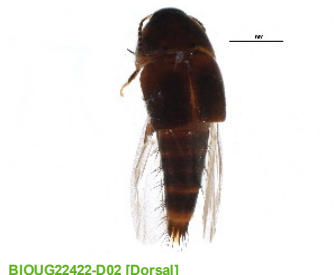

**BIOUG22422-D02 [Dorsal]**  
*Staphylinidae*  
Family: Staphylinidae  
BIN URI: BOLD:ACJ3516

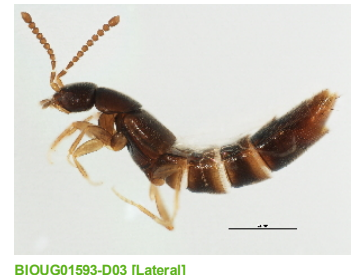

**BIOUG01593-D03 [Lateral]**  
*Amischa analis*  
Family: Staphylinidae  
BIN URI: BOLD:ABA5313

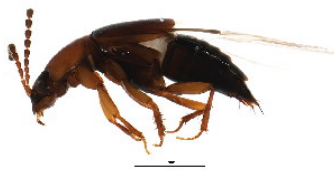

**BIOUG01144-E10 [Lateral]**  
*Tachinus corticinus*  
 Family: Staphylinidae  
 BIN URI: BOLD:AAH0107

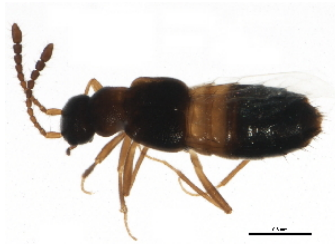

**BIOUG01502-C11 [Lateral]**  
*Meronera*  
 Family: Staphylinidae  
 BIN URI: BOLD:ABW2870

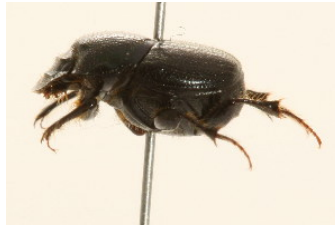

**09BBCOL-0754 [Lateral]**  
*Onthophagus orpheus orpheus*  
 Family: Scarabaeidae  
 BIN URI: BOLD:AAH6827

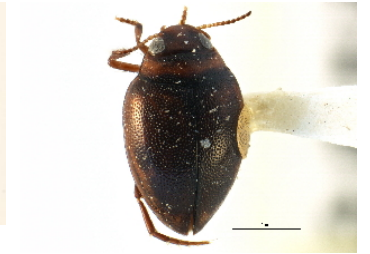

**CCDB-21428-H08 [Dorsal]**  
*Hygrotus intermedius*  
 Family: Dytiscidae  
 BIN URI: BOLD:AAH3354

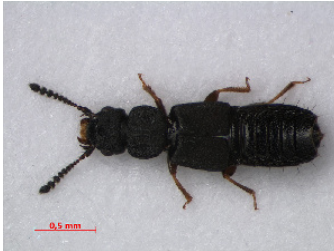

**RMNH.INS.535818 [Dorsal]**  
*Anotylus tetracarminatus*  
 Family: Staphylinidae  
 BIN URI: BOLD:AAH1738

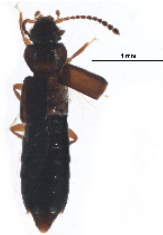

**BIOUG22867-B04 [Dorsal]**  
*Carpelimus fuliginosus*  
 Family: Staphylinidae  
 BIN URI: BOLD:AAO0558

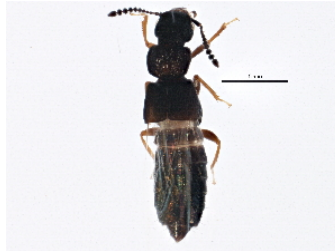

**BIOUG05586-D02 [Dorsal]**  
*Anotylus*  
 Family: Staphylinidae  
 BIN URI: BOLD:AAH0104

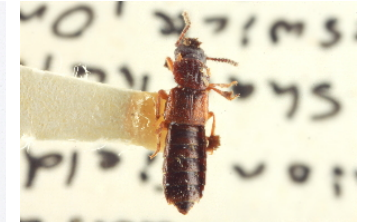

**CNC COLEO 00250918 [Dorsal]**  
*Anotylus insecatus*  
 Family: Staphylinidae  
 BIN URI: BOLD:AAR3352

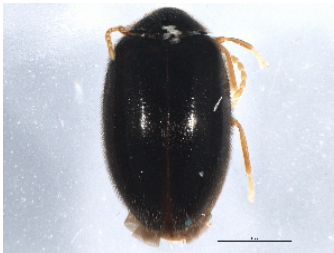

**BIOUG10131-A12 [Dorsal]**  
*Cyphon*  
 Family: Scirtidae  
 BIN URI: BOLD:AAM7653

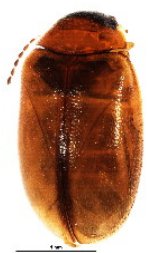

**BIOUG00993-G03 [Dorsal]**  
*Cyphon laevipennis*  
 Family: Scirtidae  
 BIN URI: BOLD:AAG3633

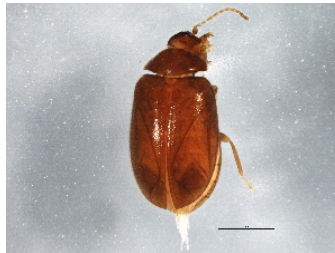

**BIOUG02856-D06 [Dorsal]**  
*Cyphon obscurus*  
 Family: Scirtidae  
 BIN URI: BOLD:AAG7259

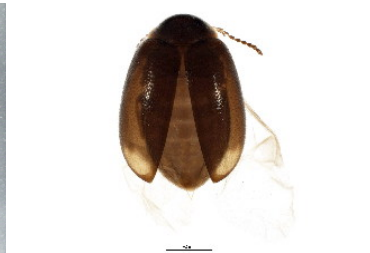

**BIOUG01502-B02 [Dorsal]**  
*Cyphon pusillus*  
 Family: Scirtidae  
 BIN URI: BOLD:AAP7021

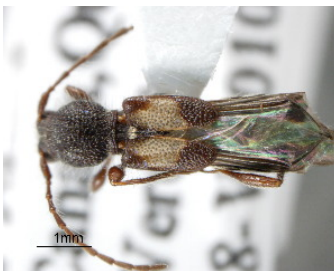

**CNCCOLVG00001507 [Dorsal]**  
*Molorchus bimaculatus*  
 Family: Cerambycidae  
 BIN URI: BOLD:AAH0019

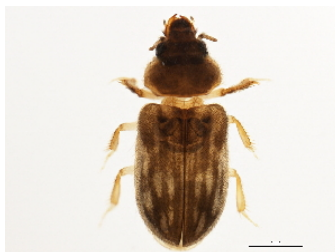

**BIOUG00670-B06 [Dorsal]**  
*Lapsus tristis*  
 Family: Heteroceridae  
 BIN URI: BOLD:AAP7099

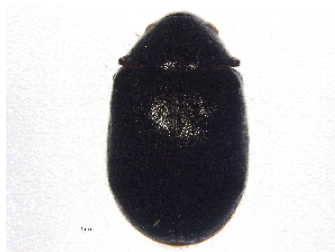

**BIOUG07429-H02 [Dorsal]**  
 Ptinidae  
 Family: Ptinidae  
 BIN URI: BOLD:ACC7074

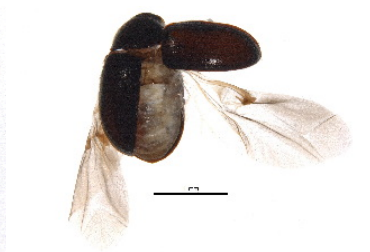

**BIOUG20950-A11 [Dorsal]**  
 Coleoptera  
 BIN URI: BOLD:ACV1604

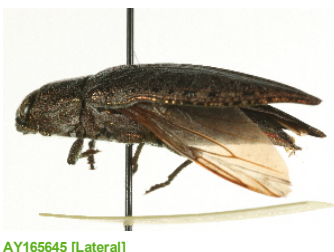

**AY165645 [Lateral]**  
*Dicerca divaricata*  
 Family: Buprestidae  
 BIN URI: BOLD:AAC3543

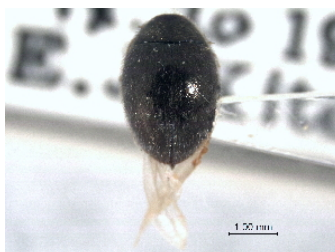

**CNC COLEO 00159480 [Dorsal]**  
*Simplicaria semistriata*  
 Family: Byrrhidae  
 BIN URI: BOLD:ABW1696

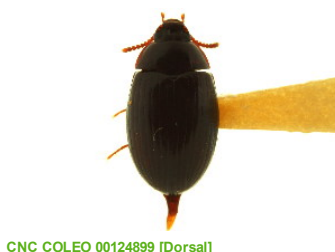

**CNC COLEO 00124899 [Dorsal]**  
*Platydemus oregonense*  
 Family: Tenebrionidae  
 BIN URI: BOLD:AAH9734

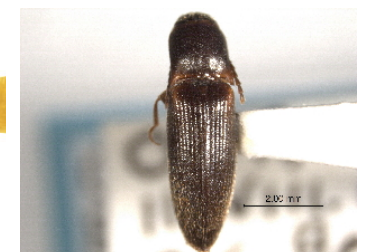

**CNC COLEO 00158240 [Dorsal]**  
*Dalopius vagus*  
 Family: Elateridae  
 BIN URI: BOLD:AAH2416

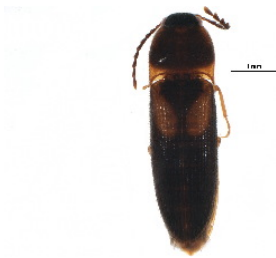

**BIOUG22422-E08 [Dorsal]**  
Ampedus areolatus  
Family: Elateridae  
BIN URI: BOLD:ACM2015

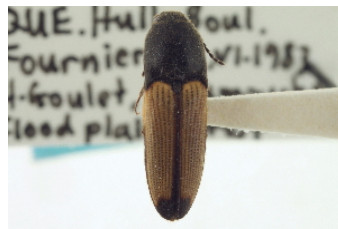

**CNC COLEO 00157941 [Dorsal]**  
Ampedus linteus  
Family: Elateridae  
BIN URI: BOLD:AAU7141

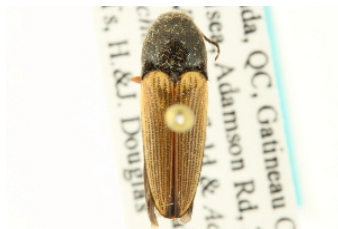

**CNC COLEO 00158596 [Dorsal]**  
Ampedus nigricollis  
Family: Elateridae  
BIN URI: BOLD:AAH2376

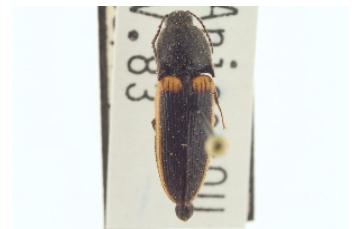

**CNC COLEO 00157969 [Dorsal]**  
Ampedus oblesus  
Family: Elateridae  
BIN URI: BOLD:ACA3849

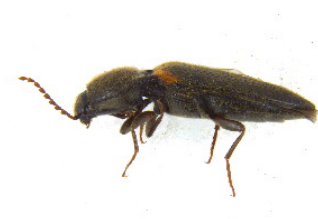

**BIOUG06758-D10 [Lateral]**  
Ampedus protervus  
Family: Elateridae  
BIN URI: BOLD:ACR3975

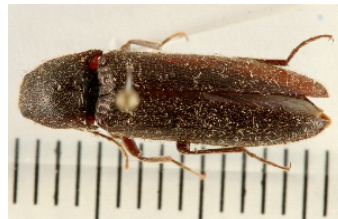

**08BBCOL-0026 [Dorsal]**  
Melanotus castanipes  
Family: Elateridae  
BIN URI: BOLD:AAH2378

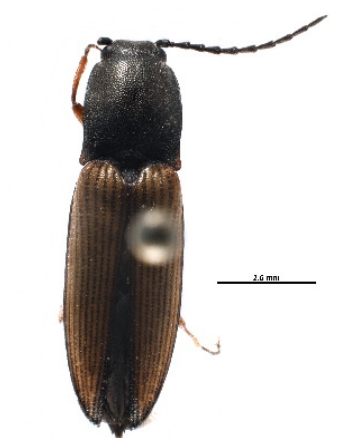

**BIOUG22326-C09 [Dorsal]**  
Corymbitodes tarsalis  
Family: Elateridae  
BIN URI: BOLD:ACV5201

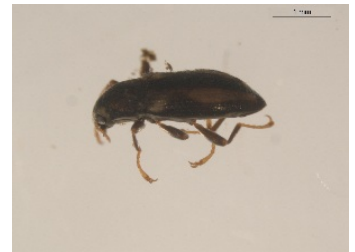

**BIOUG01315-C05 [Lateral]**  
Dubiraphia sp. BOLD:AAF6867  
Family: Elmidae  
BIN URI: BOLD:AAF6867

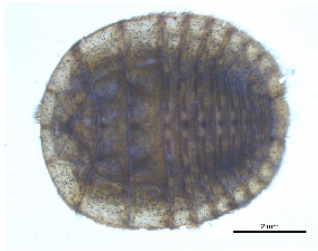

**BIOUG06975-C12 [Dorsal]**  
Psephenus herricki  
Family: Psephenidae  
BIN URI: BOLD:AA86713

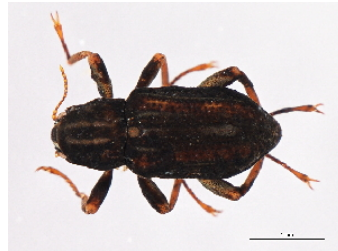

**09BBECO-0512 [Dorsal]**  
Stenelmis crenata  
Family: Elmidae  
BIN URI: BOLD:AAC4909

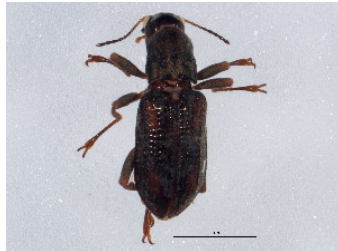

**BIOUG02273-C09 [Dorsal]**  
Stenelmis  
Family: Elmidae  
BIN URI: BOLD:ABZ5521

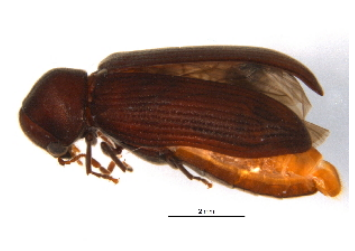

**BIOUG07026-E02 [Lateral]**  
Ptinidae  
Family: Ptinidae  
BIN URI: BOLD:ACH2408

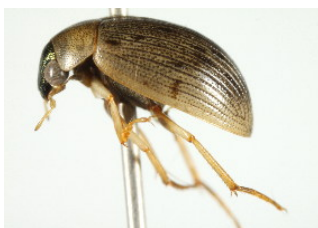

**PCPP10-0060 [Lateral]**  
Berosus  
Family: Hydrophilidae  
BIN URI: BOLD:AAH0308

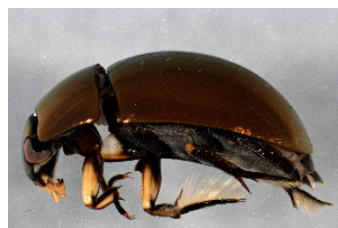

**BIOUG02274-C04 [Lateral]**  
Hydrophilidae  
Family: Hydrophilidae  
BIN URI: BOLD:ABY1765

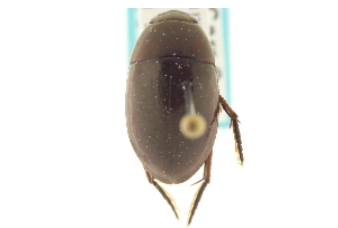

**CNC COLEO 00150769 [Dorsal]**  
Tropisternus natator  
Family: Hydrophilidae  
BIN URI: BOLD:ACA3026

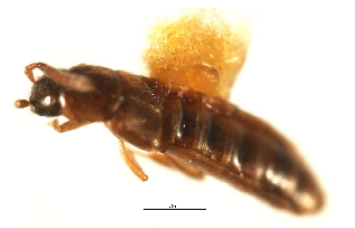

**05-CTATBI-0642 [Dorsal]**  
Aleocharinae  
Family: Staphylinidae  
BIN URI: BOLD:AAH0119

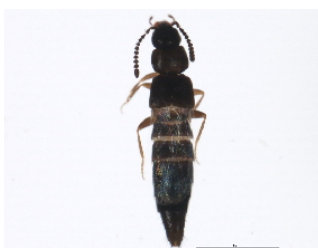

**BIOUG00873-E10 [Dorsal]**  
Staphylinidae

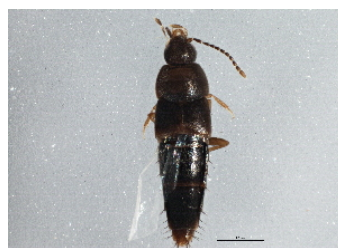

**BIOUG08688-A05 [Dorsal]**  
Staphylinidae

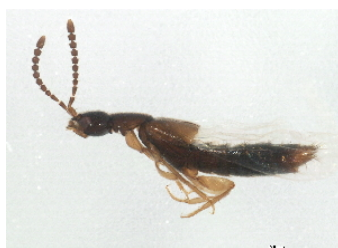

**BIOUG01593-E05 [Lateral]**  
Atheta

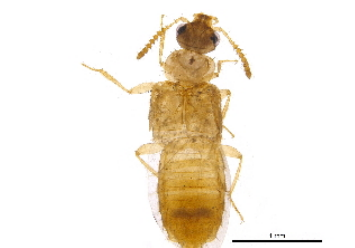

**BIOUG22838-G10 [Dorsal]**  
Staphylinidae



Family: Staphylinidae  
BIN URI: BOLD:AAU6968

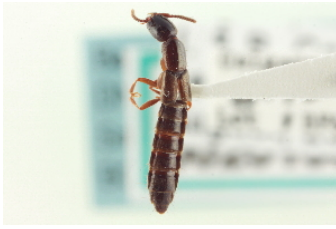

**CNC COLEO 00251951 [Dorsal]**  
*Xantholinus linearis*  
Family: Staphylinidae  
BIN URI: BOLD:AAG4333

Family: Staphylinidae  
BIN URI: BOLD:ACJ6804

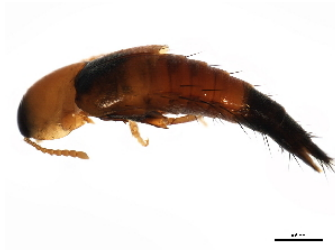

**10PHMAL-1775 [Lateral]**  
*Tachyporus elegans*  
Family: Staphylinidae  
BIN URI: BOLD:AAU6934

Family: Staphylinidae  
BIN URI: BOLD:ABW2820

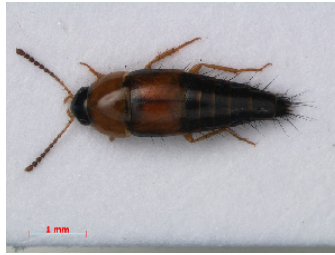

**RMNH.INS.535739 [Dorsal]**  
*Tachyporus dispar*  
Family: Staphylinidae  
BIN URI: BOLD:AAN9511

Family: Staphylinidae  
BIN URI: BOLD:ACV6600

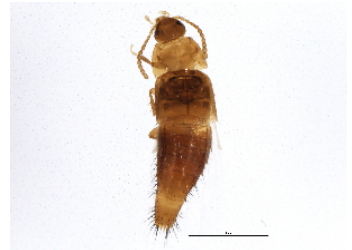

**BIOUG03260-A02 [Dorsal]**  
*Tachyporus nitidulus*  
Family: Staphylinidae  
BIN URI: BOLD:ABA9096

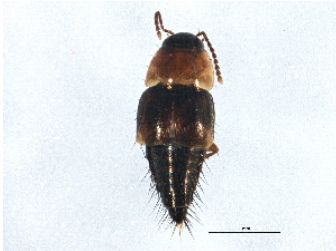

**BIOUG01309-G02 [Dorsal]**  
*Tachyporus atriceps*  
Family: Staphylinidae  
BIN URI: BOLD:ABX2484

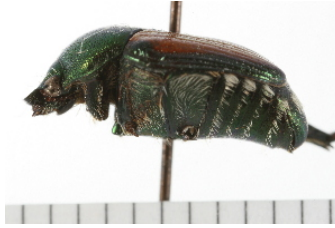

**COLP 0085.02 [Lateral]**  
*Popillia japonica*  
Family: Scarabaeidae  
BIN URI: BOLD:AAF0418

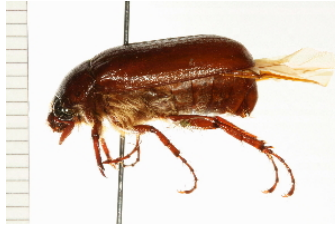

**08OEC-054 [Lateral]**  
*Phyllophaga futilis*  
Family: Scarabaeidae  
BIN URI: BOLD:AAD1098

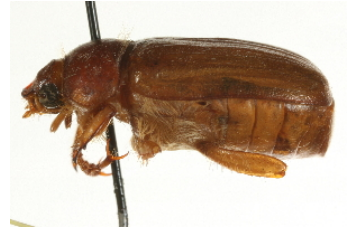

**AY165642 [Lateral]**  
*Phyllophaga rugosa*  
Family: Scarabaeidae  
BIN URI: BOLD:AAJ2312

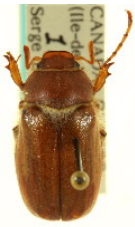

**CNC COLEO 00094284 [Dorsal]**  
*Amphimallon majale*  
Family: Scarabaeidae  
BIN URI: BOLD:AAR3859

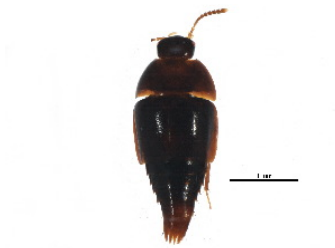

**BIOUG06798-F07 [Dorsal]**  
*Coproporus ventriculus*  
Family: Staphylinidae  
BIN URI: BOLD:ACV1788

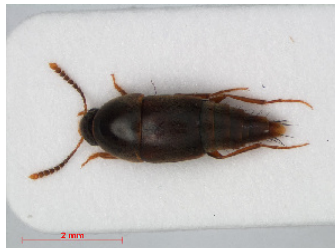

**RMNH.INS.536208 [Dorsal]**  
*Sepedophilus testaceus*  
Family: Staphylinidae  
BIN URI: BOLD:AAH0108

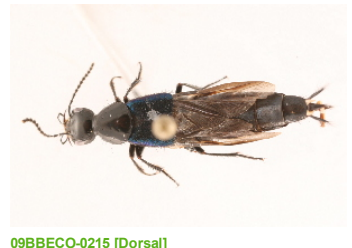

**09BBECO-0215 [Dorsal]**  
*Philonthus caeruleipennis*  
Family: Staphylinidae  
BIN URI: BOLD:AAF6824

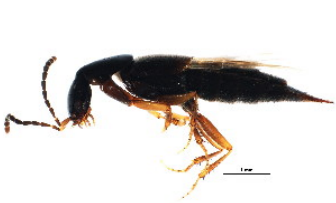

**BIOUG00993-H01 [Lateral]**  
*Philonthus flavibasis*  
Family: Staphylinidae  
BIN URI: BOLD:AAH0113

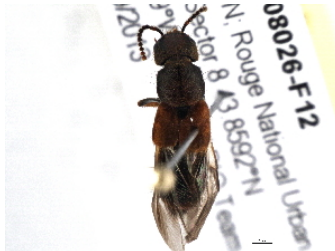

**BIOUG08026-F12 [Dorsal]**  
*Platydracus cinnamopterus*  
Family: Staphylinidae  
BIN URI: BOLD:ACJ0017

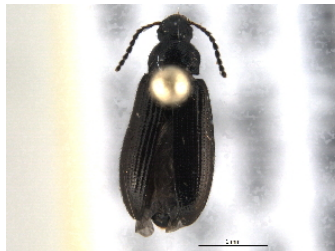

**BIOUG07704-G08 [Dorsal]**  
Alleculinae  
Family: Tenebrionidae  
BIN URI: BOLD:AAY6541

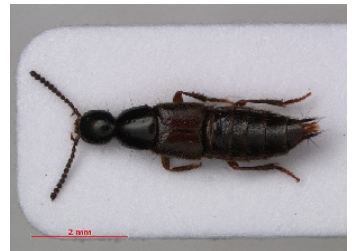

**RMNH.INS.535853 [Dorsal]**  
*Philonthus debilis*  
Family: Staphylinidae  
BIN URI: BOLD:ABV1529

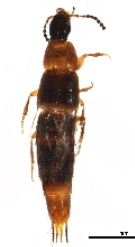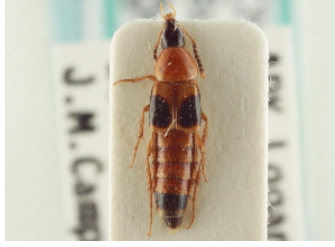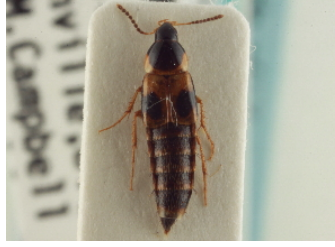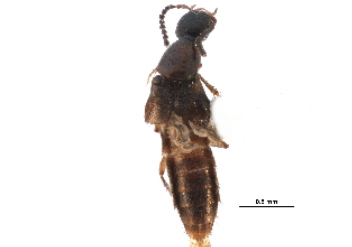

**BIOUG22362-G06 [Dorsal]**  
Staphylinidae  
Family: Staphylinidae  
BIN URI: BOLD:ACV3870

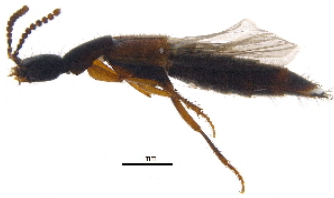

**CNC COLEO 00161500 [Dorsal]**  
Lordithon cinctus  
Family: Staphylinidae  
BIN URI: BOLD:ABA6370

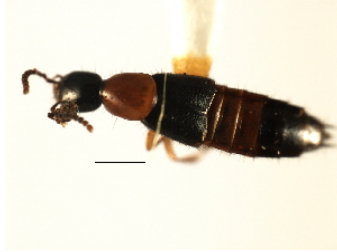

**CNC COLEO 00161517 [Dorsal]**  
Lordithon appalachianus  
Family: Staphylinidae  
BIN URI: BOLD:ABA6331

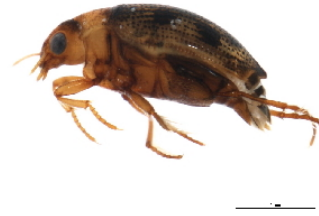

**CCDB-23048-D11 [Dorsal]**  
Gabrius microphthalmus  
Family: Staphylinidae  
BIN URI: BOLD:ABW2822

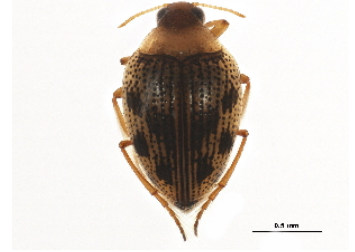

**BIOUG22876-D02 [Lateral]**  
Staphylinidae  
Family: Staphylinidae  
BIN URI: BOLD:ACW0850

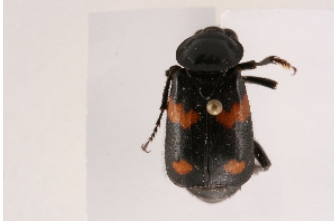

**05-CTATBI-0650 [Dorsal]**  
Bisnius blandus  
Family: Staphylinidae  
BIN URI: BOLD:AAH0121

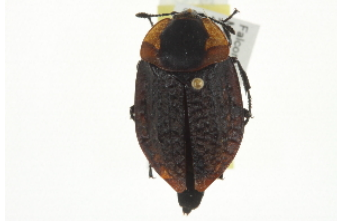

**10PCCOL-0191 [Lateral]**  
Halipus immaculicollis  
Family: Halipidae  
BIN URI: BOLD:AAI6895

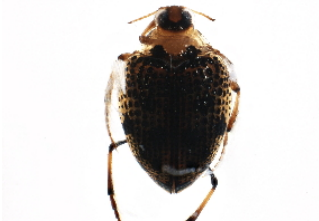

**BIOUG24029-G01 [Dorsal]**  
Halipus  
Family: Halipidae

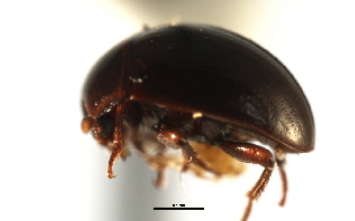

**09BBCOL-0075 [Dorsal]**  
Nicrophorus orbicollis  
Family: Silphidae  
BIN URI: BOLD:AAE1939

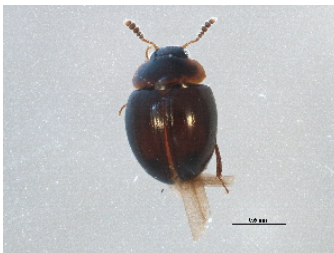

**JBWM0211465 [Dorsal]**  
Necrophila americana  
Family: Silphidae  
BIN URI: BOLD:AAG2066

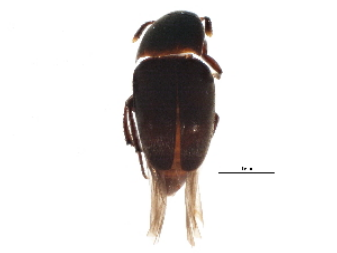

**BIOUG21000-H01 [Lateral]**  
Coleoptera  
BIN URI: BOLD:ACU8601

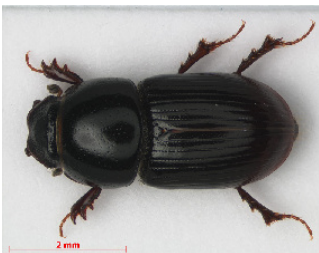

**05-CTATBI-0652 [Lateral]**  
Anisotoma obsoleta  
Family: Leiodidae  
BIN URI: BOLD:AAR3435

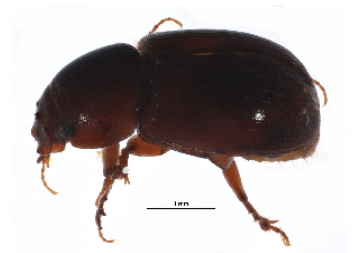

**BIOUG10440-G02 [Dorsal]**  
Leiodinae  
Family: Leiodidae  
BIN URI: BOLD:ACL8841

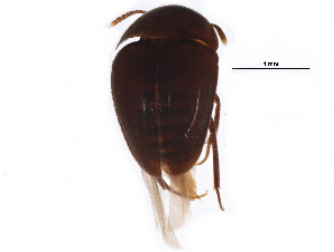

**BIOUG15940-F07 [Dorsal]**  
Coleoptera  
BIN URI: BOLD:ACQ7563

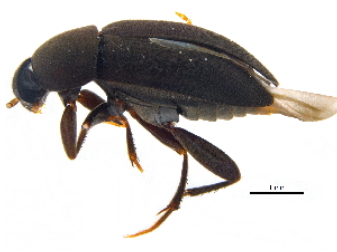

**RMNH.INS.535945 [Dorsal]**  
Aphodius granarius  
Family: Scarabaeidae  
BIN URI: BOLD:AAM7733

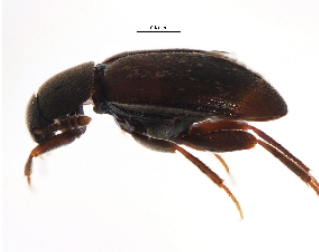

**BIOUG24028-E01 [Lateral]**  
Aphodius granarius  
Family: Scarabaeidae

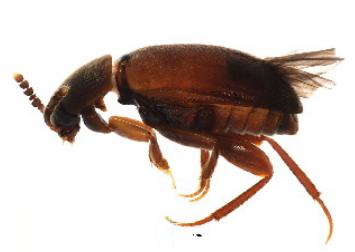

**BIOUG22288-H03 [Dorsal]**  
Leiodidae  
Family: Leiodidae  
BIN URI: BOLD:ACI6050

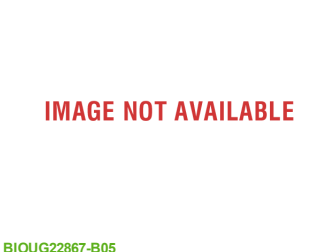

**BIOUG22325-C01 [Lateral]**  
Prionochaeta opaca  
Family: Leiodidae  
BIN URI: BOLD:AAP6949

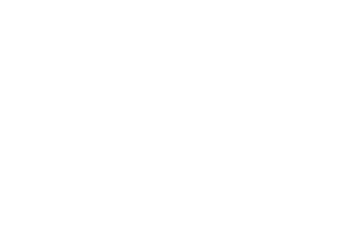

**BIOUG00781-D12 [Lateral]**  
Catops paramericus  
Family: Leiodidae  
BIN URI: BOLD:AAH3504

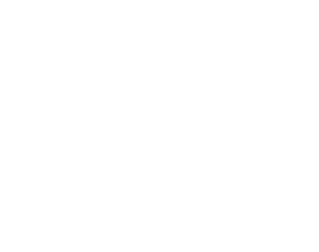

**BIOUG00971-E05 [Lateral]**  
Catops  
Family: Leiodidae  
BIN URI: BOLD:ABW6289

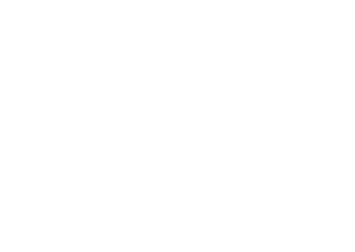

IMAGE NOT AVAILABLE

BIOUG22867-B05

Cholevinae  
Family: Leioididae

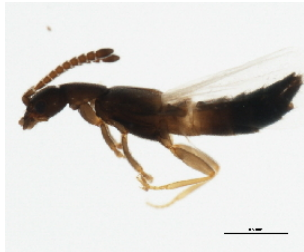

**BIOUG00828-C04 [Lateral]**  
Staphylinidae  
Family: Staphylinidae  
BIN URI: BOLD:AAY6554

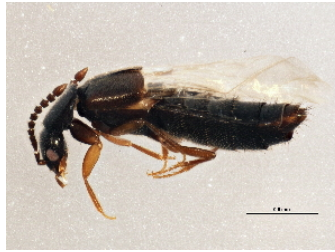

**BIOUG03521-E06 [Lateral]**  
*Atheta brunneipennis*  
Family: Staphylinidae  
BIN URI: BOLD:ABA9094

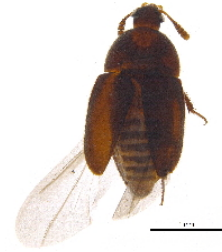

**BIOUG22838-F08 [Dorsal]**  
Leioididae  
Family: Leioididae  
BIN URI: BOLD:ACV8702

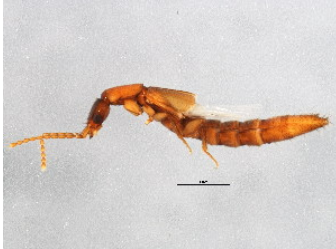

**BIOUG02279-F12 [Lateral]**  
Coleoptera  
BIN URI: BOLD:ABX3618

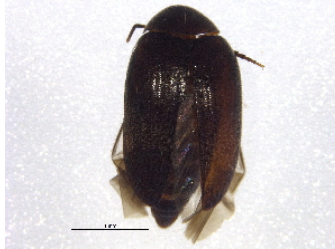

**BIOUG07429-H04 [Dorsal]**  
Eucinetidae  
Family: Eucinetidae  
BIN URI: BOLD:ABW2834

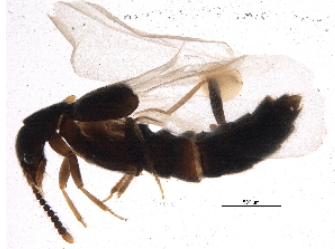

**BIOUG10519-D02 [Lateral]**  
Staphylinidae  
Family: Staphylinidae  
BIN URI: BOLD:ACC7094

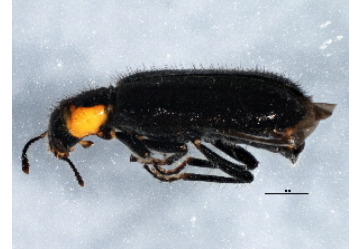

**BIOUG02862-A12 [Lateral]**  
*Placopterus thoracicus*  
Family: Cleridae  
BIN URI: BOLD:AAP8584

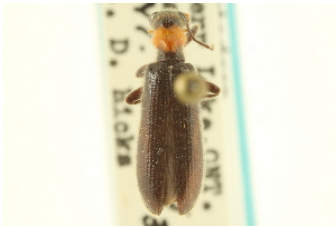

**CNC COLEO 00154865 [Dorsal]**  
*Cymatodera bicolor*  
Family: Cleridae  
BIN URI: BOLD:AAU6910

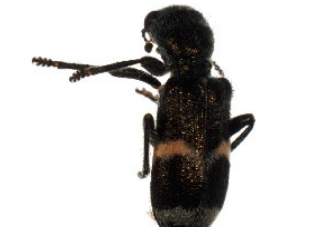

**BIOUG00874-D07 [Dorsal]**  
*Enoclerus nigripes rufiventris*  
Family: Cleridae  
BIN URI: BOLD:AAU6970

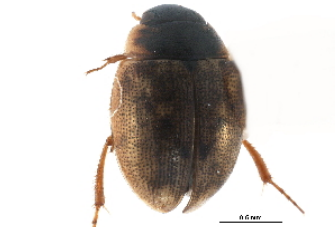

**CCDB-23054-G09 [Dorsal]**  
*Laccobius spangleri*  
Family: Hydrophilidae  
BIN URI: BOLD:ACA3199

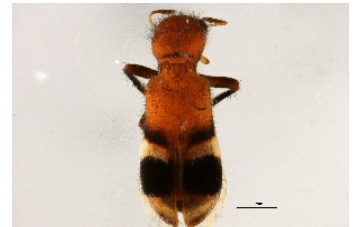

**BIOUG08803-C10 [Dorsal]**  
*Enoclerus*  
Family: Cleridae  
BIN URI: BOLD:ACI9790

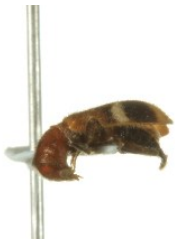

**52-4-032 [Lateral]**  
*Enoclerus nigripes dubius*  
Family: Cleridae  
BIN URI: BOLD:ACK1620

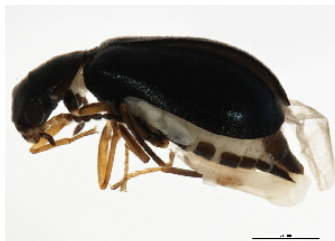

**BIOUG00828-C07 [Lateral]**  
*Hypebaeus apicalis*  
Family: Melyridae  
BIN URI: BOLD:AAN5932

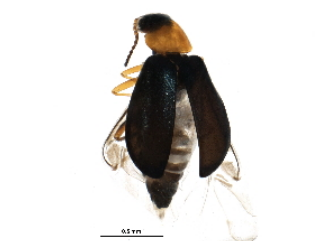

**BIOUG21892-B09 [Dorsal]**  
Melyridae  
Family: Melyridae  
BIN URI: BOLD:ACV5054

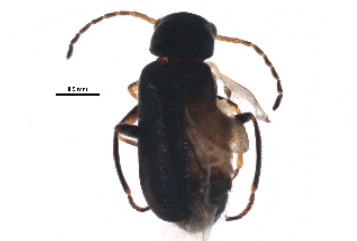

**BIOUG24003-C06 [Dorsal]**  
Melyridae  
Family: Melyridae

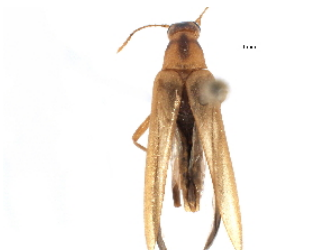

**CCDB-22970-D03 [Dorsal]**  
*Cephaloon lepturoides*  
Family: Stenotrachelidae  
BIN URI: BOLD:AAI3796

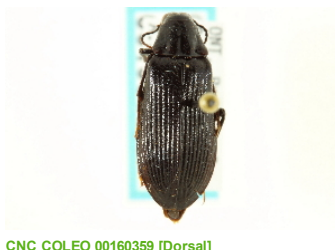

**CNC COLEO 00160359 [Dorsal]**  
*Melandrya striata*  
Family: Melandryidae  
BIN URI: BOLD:AAK7242

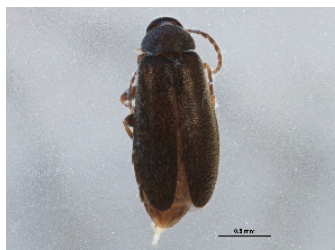

**BIOUG11724-D09 [Dorsal]**  
*Canifa*  
Family: Scaptidae  
BIN URI: BOLD:ACM5031

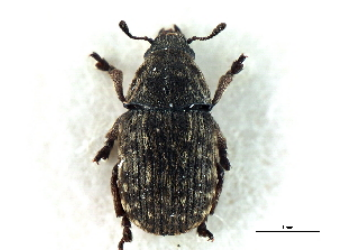

**CNC COLEO 00109593 [Dorsal]**  
*Anthrribus nebulosus*  
Family: Anthribidae  
BIN URI: BOLD:AAO1339

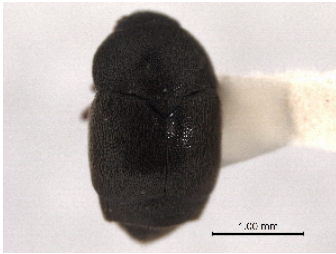

**CNC COLEO 00159686 [Dorsal]**  
*Brachyterolus pulicarius*  
 Family: Kateretidae  
 BIN URI: BOLD:ABA9077

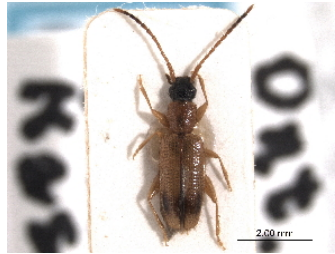

**CNC COLEO 00159854 [Dorsal]**  
*Telephanus velox*  
 Family: Silvanidae  
 BIN URI: BOLD:AAW6380

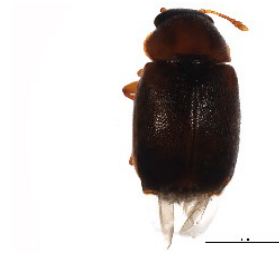

**BIOUG00971-B05 [Dorsal]**  
 Kateretidae  
 Family: Kateretidae  
 BIN URI: BOLD:ABA9071

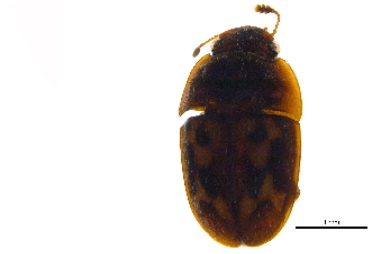

**BIOUG22867-B01 [Dorsal]**  
 Nitidulidae  
 Family: Nitidulidae  
 BIN URI: BOLD:ACV5474

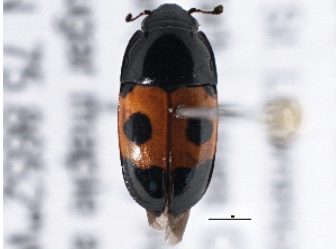

**BIOUG06614-E04 [Dorsal]**  
*Glischrochilus sanguinolentus sanguinolentus*  
 Family: Nitidulidae  
 BIN URI: BOLD:AAP8585

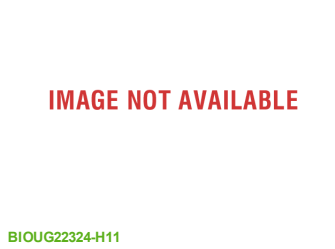

**BIOUG22324-H11**  
*Glischrochilus fasciatus*  
 Family: Nitidulidae

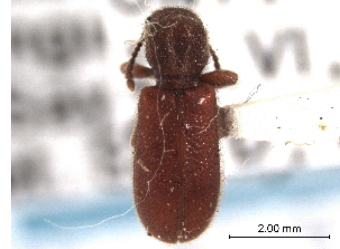

**CNC COLEO 00154897 [Dorsal]**  
*Zenodosus sanguineus*  
 Family: Cleridae  
 BIN URI: BOLD:ABA6311

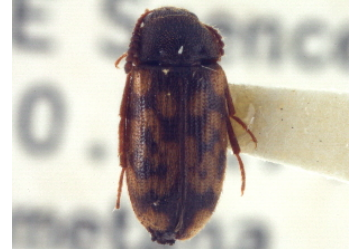

**CNC COLEO 00160184 [Dorsal]**  
*Mycetophagus pluripunctatus*  
 Family: Mycetophagidae  
 BIN URI: BOLD:ACB0681

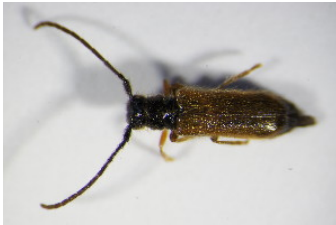

**BFB\_Col\_FK\_9283 [Dorsal]**  
*Tetrops starkii*  
 Family: Cerambycidae  
 BIN URI: BOLD:AAE9431

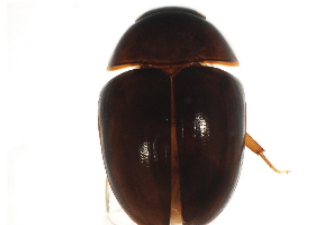

**BIOUG05559-F08 [Dorsal]**  
 Phalacridae  
 Family: Phalacridae  
 BIN URI: BOLD:ACF7672

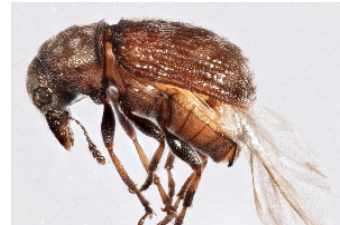

**BIOUG02789-C05 [Dorsal]**  
*Ormiscus walshii*  
 Family: Anthribidae  
 BIN URI: BOLD:AAU7341

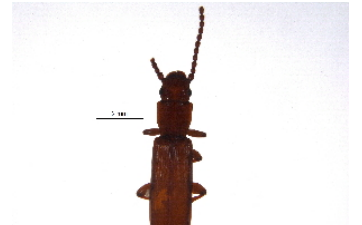

**BIOUG09831-G12 [Dorsal]**  
 Passandridae  
 Family: Passandridae  
 BIN URI: BOLD:ACL2308

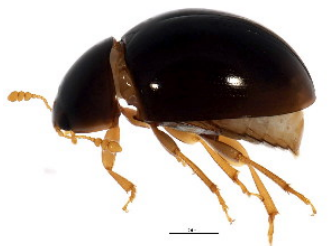

**BIOUG00971-H09 [Lateral]**  
 Phalacridae  
 Family: Phalacridae  
 BIN URI: BOLD:AAG4848

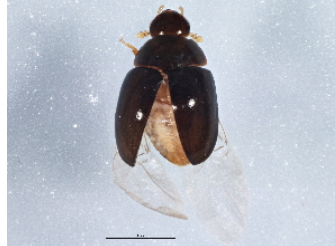

**BIOUG07916-G06 [Dorsal]**  
*Oilbrus semistriatus*  
 Family: Phalacridae  
 BIN URI: BOLD:AAK9463

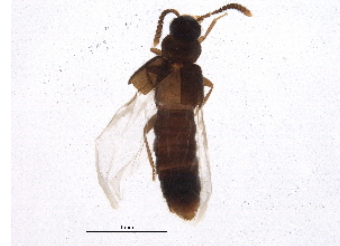

**BIOUG09870-C08 [Dorsal]**  
 Staphylinidae  
 Family: Staphylinidae  
 BIN URI: BOLD:ACD9884

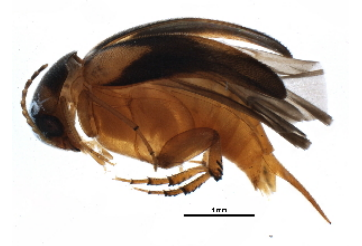

**BIOUG08611-B06 [Lateral]**  
 Mordellistena  
 Family: Mordellidae  
 BIN URI: BOLD:ACK1250

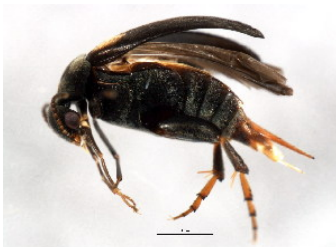

**BIOUG00818-E09 [Lateral]**  
 Mordellidae  
 Family: Mordellidae  
 BIN URI: BOLD:AAU6912

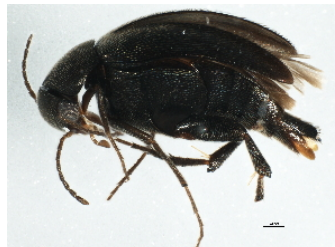

**BIOUG03515-G05 [Lateral]**  
 Mordellistena  
 Family: Mordellidae  
 BIN URI: BOLD:AAH0125

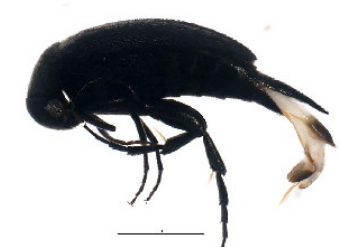

**BIOUG00971-E02 [Lateral]**  
 Mordellistena  
 Family: Mordellidae  
 BIN URI: BOLD:ABA9087

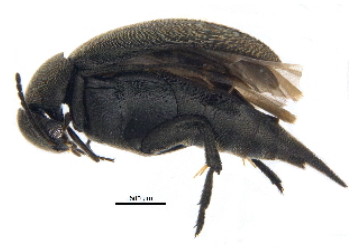

**BIOUG22927-D02 [Lateral]**  
 Mordellidae  
 Family: Mordellidae  
 BIN URI: BOLD:ABA5303

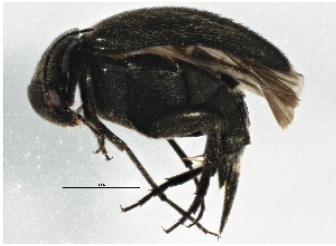

**BIOUG09009-A02 [Lateral]**  
Mordellidae  
Family: Mordellidae  
BIN URI: BOLD:ACK6134

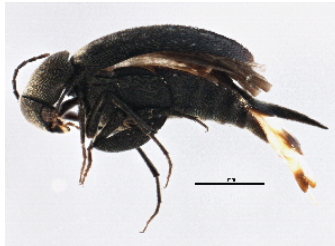

**BIOUG03065-H10 [Lateral]**  
Mordellistena  
Family: Mordellidae  
BIN URI: BOLD:AAU7291

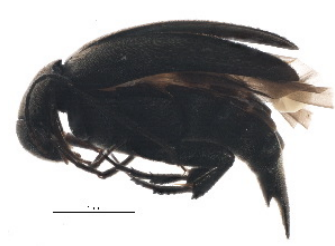

**BIOUG21328-C09 [Lateral]**  
Coleoptera  
Family: Mordellidae  
BIN URI: BOLD:ACU9444

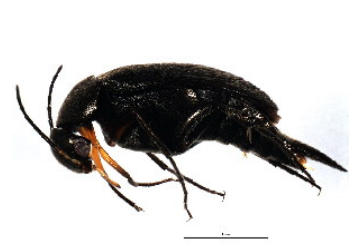

**BIOUG00971-F12 [Lateral]**  
Mordellistena  
Family: Mordellidae  
BIN URI: BOLD:ABA9078

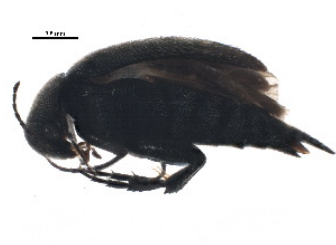

**BIOUG22729-A06 [Lateral]**  
Mordellidae  
Family: Mordellidae  
BIN URI: BOLD:ACV5549

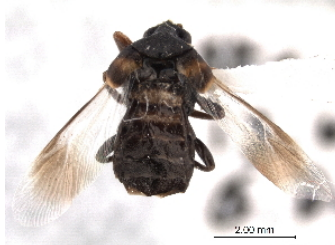

**CNC COLEO 00160522 [Dorsal]**  
Ripiphorus fasciatus  
Family: Ripiphoridae  
BIN URI: BOLD:ABA6346

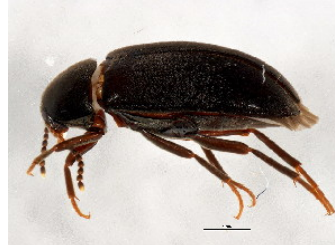

**BIOUG00818-H11 [Lateral]**  
Mallodrya subaenea  
Family: Synchroidae  
BIN URI: BOLD:AAK7440

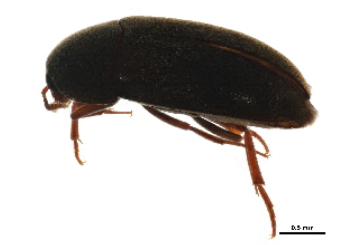

**BIOUG22289-B10 [Lateral]**  
Eustrophus tomentosus  
Family: Tetratomidae  
BIN URI: BOLD:ACI7017

IMAGE NOT AVAILABLE

**BIOUG22729-C02**  
Mycetophagidae  
Family: Mycetophagidae

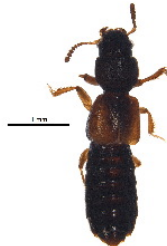

**BIOUG20566-C10 [Dorsal]**  
Staphylinidae  
Family: Staphylinidae  
BIN URI: BOLD:ACV4933

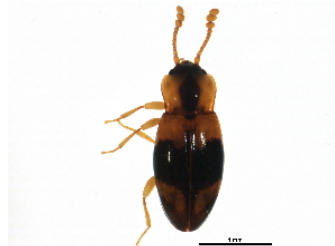

**BIOUG22361-F04 [Dorsal]**  
Phymaphora pulchella  
Family: Endomychidae  
BIN URI: BOLD:ACI7114

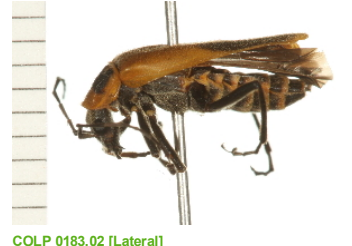

**COLP 0183.02 [Lateral]**  
Chauliognathus pensylvanicus  
Family: Cantharidae  
BIN URI: BOLD:AAH0916

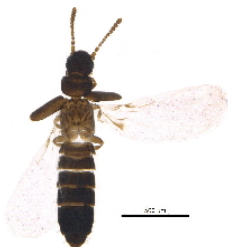

**BIOUG22867-A08 [Dorsal]**  
Staphylinidae  
Family: Staphylinidae  
BIN URI: BOLD:ACV4901

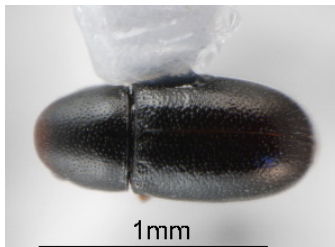

**CNCCOLVG00001304 [Dorsal]**  
Ceraeus thoracicornis  
Family: Ciidae  
BIN URI: BOLD:AAK0893

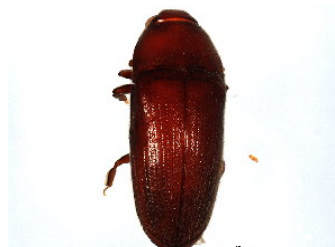

**BIOUG00971-C12 [Dorsal]**  
Aulonothroscus distans  
Family: Throscidae  
BIN URI: BOLD:ABA9083

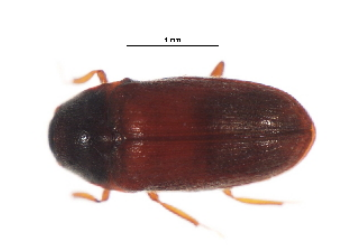

**BIOUG00781-E04 [Dorsal]**  
Coleoptera  
BIN URI: BOLD:AAU7339

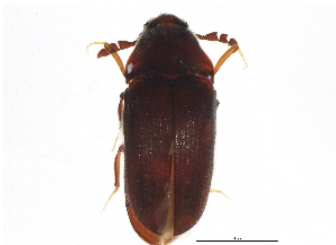

**BIOUG05507-E08 [Dorsal]**  
Trixagus carinicolis  
Family: Throscidae  
BIN URI: BOLD:AAAN6148

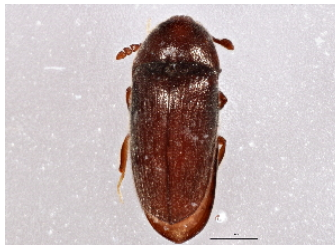

**BIOUG02832-H01 [Dorsal]**  
Trixagus  
Family: Throscidae  
BIN URI: BOLD:AAU6966

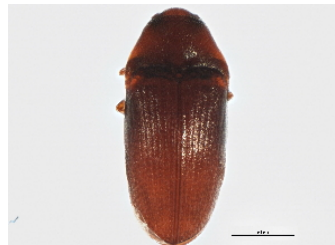

**BIOUG01649-A09 [Dorsal]**  
Trixagus  
Family: Throscidae  
BIN URI: BOLD:ABW2869

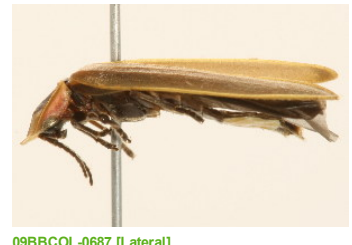

**09BBCOL-0687 [Lateral]**  
Pyraetomena  
Family: Lampyridae  
BIN URI: BOLD:AAH6661

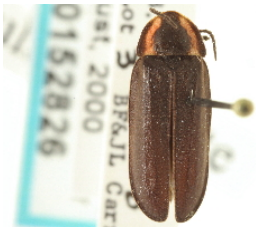

**CNC COLEO 00152826 [Lateral]**  
*Ellychnia facula*  
 Family: Lampyridae  
 BIN URI: BOLD:ACV4844

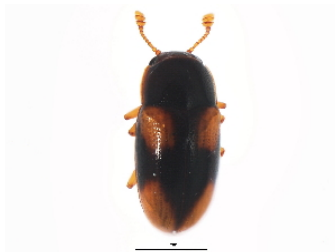

**BIOUG00781-H03 [Dorsal]**  
 Coleoptera  
 BIN URI: BOLD:AAU7330

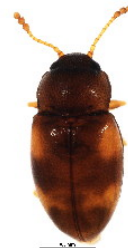

**BIOUG00993-F07 [Dorsal]**  
 Erytylidae  
 Family: Erytylidae  
 BIN URI: BOLD:ABA6320

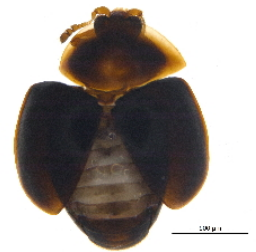

**BIOUG21887-G10 [Dorsal]**  
 Corylophidae  
 Family: Corylophidae  
 BIN URI: BOLD:ACJ0061

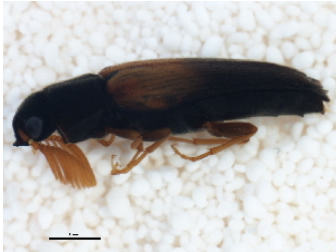

**BIOUG00824-B08 [Lateral]**  
 Eucnemidae  
 Family: Eucnemidae  
 BIN URI: BOLD:AAV6530

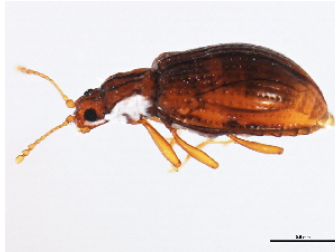

**10PCCOL-0092 [Lateral]**  
 Cartodere  
 Family: Latridiidae  
 BIN URI: BOLD:ABA9100

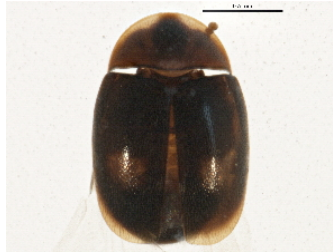

**BIOUG05539-D01 [Lateral]**  
 Clypastraea  
 Family: Corylophidae  
 BIN URI: BOLD:AAAN6155

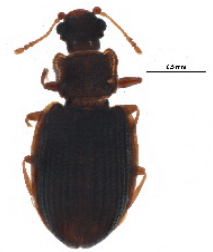

**BIOUG22729-B09 [Dorsal]**  
 Latridiidae  
 Family: Latridiidae  
 BIN URI: BOLD:ACV4877

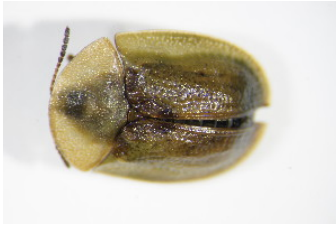

**GBOL\_CoI\_FK\_2792 [Dorsal]**  
*Cassida rubiginosa*  
 Family: Chrysomelidae  
 BIN URI: BOLD:AAO0522

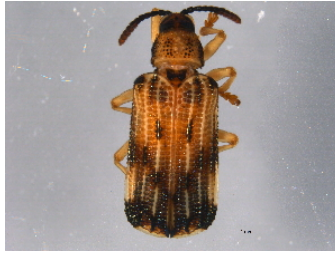

**BIOUG07914-G12 [Dorsal]**  
*Anisostena*  
 Family: Chrysomelidae  
 BIN URI: BOLD:AAV6537

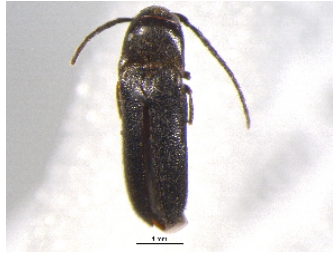

**BIOUG02947-A05 [Dorsal]**  
 Eucnemidae  
 Family: Eucnemidae  
 BIN URI: BOLD:ACA7831

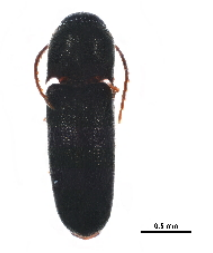

**BIOUG23320-B07 [Dorsal]**  
 Eucnemidae  
 Family: Eucnemidae  
 BIN URI: BOLD:ACW1152

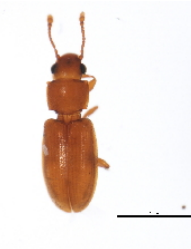

**BIOUG00873-F03 [Dorsal]**  
*Ahasverus advena*  
 Family: Silvanidae  
 BIN URI: BOLD:AAJ2005

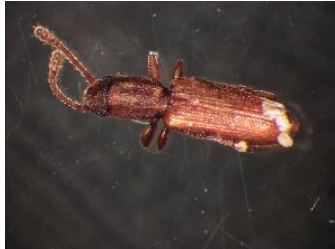

**GBOL\_CoI\_FK\_5621 [Dorsal]**  
*Silvanus bidentatus*  
 Family: Silvanidae  
 BIN URI: BOLD:AAO0157

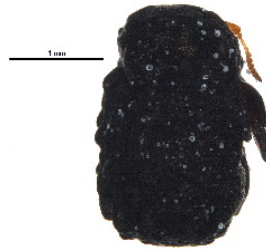

**BIOUG24020-B02 [Dorsal]**  
*Exema canadensis*  
 Family: Chrysomelidae

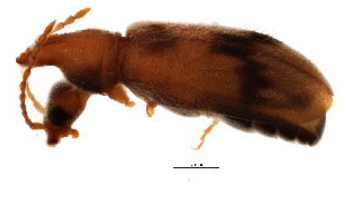

**BIOUG02281-G07 [Lateral]**  
 Anthicidae  
 Family: Anthicidae  
 BIN URI: BOLD:ABX0657

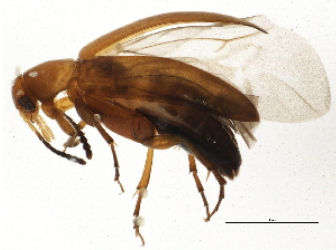

**BIOUG03260-A01 [Lateral]**  
*Anaspis rufa*  
 Family: Scrpitiidae  
 BIN URI: BOLD:AAH0469

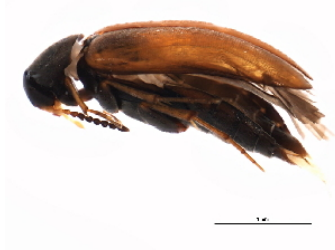

**10PCCOL-0427 [Lateral]**  
 Scrpitiidae  
 Family: Scrpitiidae  
 BIN URI: BOLD:AAP7841

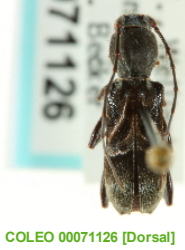

**CNC COLEO 00071126 [Dorsal]**  
*Cyrtophorus verrucosus*  
 Family: Cerambycidae  
 BIN URI: BOLD:AAD4513

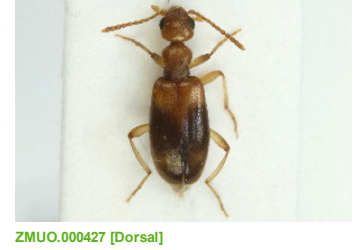

**ZMUO.000427 [Dorsal]**  
*Stricticollis tobias*  
 Family: Anthicidae  
 BIN URI: BOLD:AAQ1028

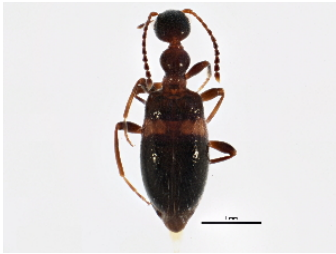

**BIOUG05529-G04 [Dorsal]**  
*Malporus formicarius*  
 Family: Anthicidae  
 BIN URI: BOLD:ACF8552

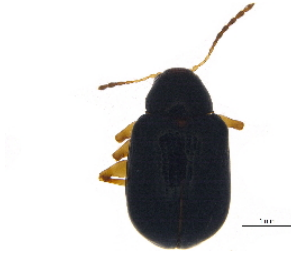

**BIOUG22325-B11 [Dorsal]**  
*Paria fragariae*  
 Family: Chrysomelidae  
 BIN URI: BOLD:ABA3960

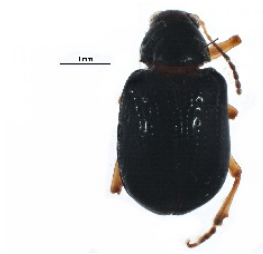

**BIOUG22422-F01 [Dorsal]**  
*Paria fragariae*  
 Family: Chrysomelidae  
 BIN URI: BOLD:ACF6671

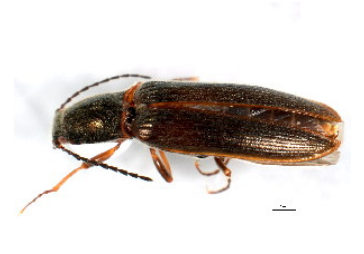

**BIOUG00818-F09 [Dorsal]**  
*Ctenicera cylindriciformis*  
 Family: Elateridae  
 BIN URI: BOLD:AAH2370

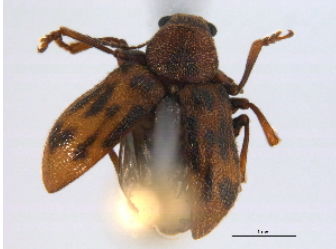

**BIOUG08060-G03 [Dorsal]**  
*Xanthonia decemnotata*  
 Family: Chrysomelidae  
 BIN URI: BOLD:ACJ0239

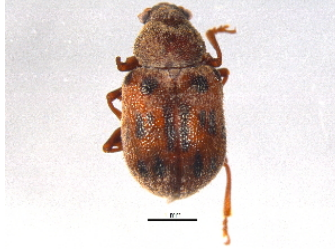

**BIOUG05721-C01 [Dorsal]**  
*Xanthonia decemnotata*  
 Family: Chrysomelidae  
 BIN URI: BOLD:ABA6335

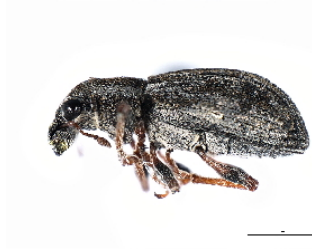

**08BBCOL-0798 [Lateral]**  
*Sitona lineellus*  
 Family: Curculionidae  
 BIN URI: BOLD:AAH0257

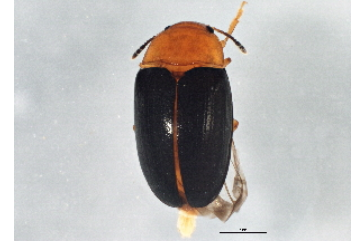

**BIOUG07122-D11 [Dorsal]**  
*Triplax thoracica*  
 Family: Erotylidae  
 BIN URI: BOLD:ACI9012

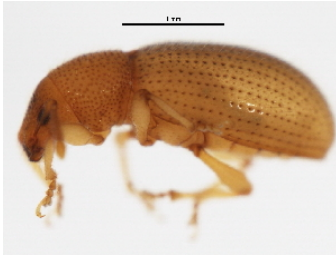

**BIOUG00781-E12 [Lateral]**  
*Barypeithes pellucidus*  
 Family: Curculionidae  
 BIN URI: BOLD:AAG5192

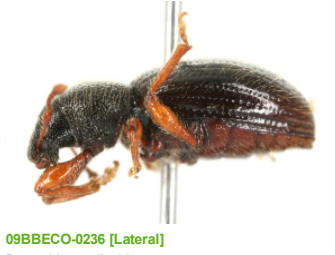

**09BBECO-0236 [Lateral]**  
*Barypeithes pellucidus*  
 Family: Curculionidae  
 BIN URI: BOLD:AAG5242

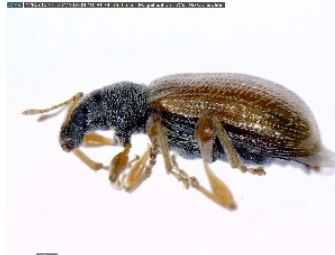

**BIOUG02612-B03 [Lateral]**  
*Phyllobius oblongus*  
 Family: Curculionidae  
 BIN URI: BOLD:AAF9187

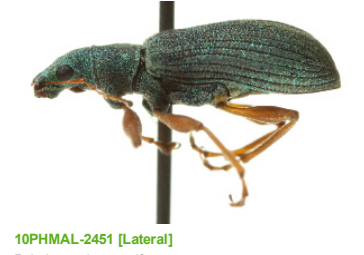

**10PHMAL-2451 [Lateral]**  
*Polydrusus impressifrons*  
 Family: Curculionidae  
 BIN URI: BOLD:AAO4332

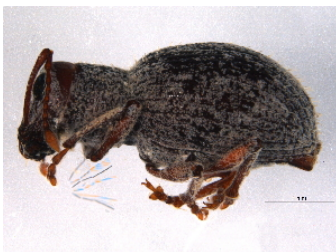

**BIOUG08040-E02 [Lateral]**  
 Curculionidae  
 Family: Curculionidae  
 BIN URI: BOLD:AAU7125

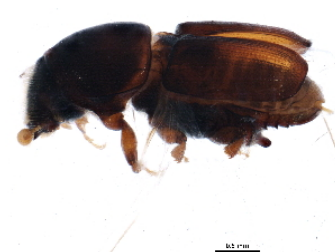

**BIOUG16047-B07 [Lateral]**  
 Scolytus  
 Family: Curculionidae  
 BIN URI: BOLD:AAD1195

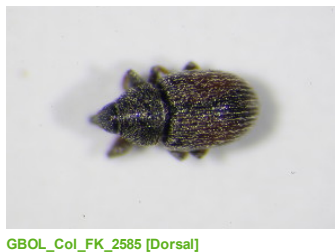

**GBOL\_Col\_FK\_2585 [Dorsal]**  
*Gymnetron pascurorum*  
 Family: Curculionidae  
 BIN URI: BOLD:AAO0328

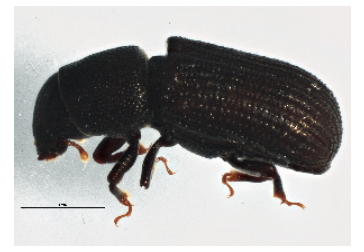

**BIOUG05829-D07 [Lateral]**  
 Curculionidae  
 Family: Curculionidae  
 BIN URI: BOLD:ACA5840

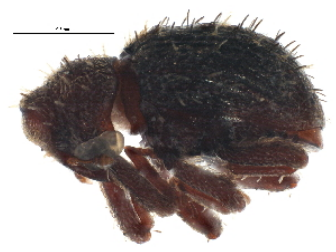

**BIOUG16340-D11 [Lateral]**  
 Coleoptera  
 BIN URI: BOLD:ACQ9042

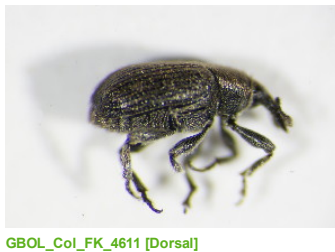

**GBOL\_Col\_FK\_4611 [Dorsal]**  
*Gymnetron antirrhini*  
 Family: Curculionidae  
 BIN URI: BOLD:ACE2245

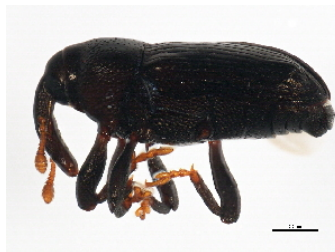

**10PHMAL-1755 [Lateral]**  
 Curculionidae  
 Family: Curculionidae  
 BIN URI: BOLD:AAU6928

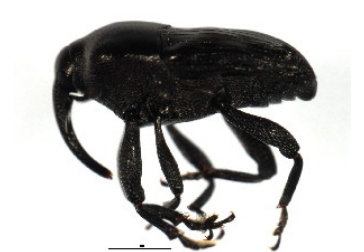

**BIOUG00874-E06 [Lateral]**  
*Madarellus undulatus*  
 Family: Curculionidae  
 BIN URI: BOLD:AAY6533

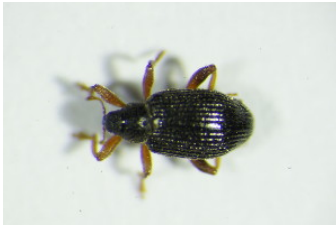

**GBOL03301 [Lateral]**  
*Isochnus*  
 Family: Curculionidae  
 BIN URI: BOLD:ACA3052

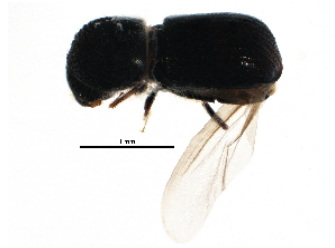

**BIOUG21769-C12 [Lateral]**  
*Xyleborus dispar*  
 Family: Curculionidae  
 BIN URI: BOLD:AAD0158

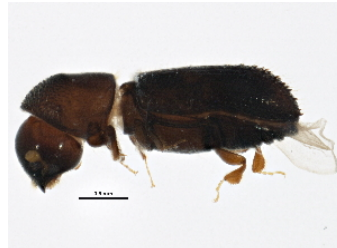

**BIOUG05510-A03 [Lateral]**  
*Xyleborinus alni*  
 Family: Curculionidae  
 BIN URI: BOLD:AAB2754

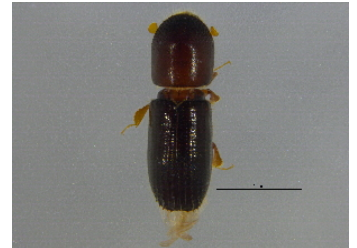

**BIOUG02856-E12 [Dorsal]**  
*Xyleborinus saxeseni*  
 Family: Curculionidae  
 BIN URI: BOLD:AAB9578

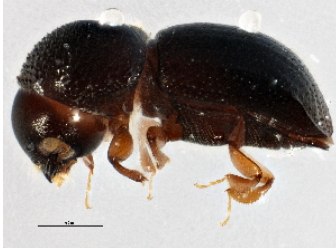

**BIOUG03065-F12 [Dorsal]**  
*Xylosandrus germanus*  
 Family: Curculionidae  
 BIN URI: BOLD:AAF7523

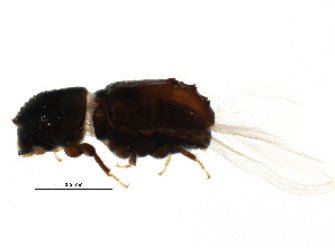

**BIOUG21769-A01 [Lateral]**  
*Pityogenes hopkinsi*  
 Family: Curculionidae  
 BIN URI: BOLD:ABW5076

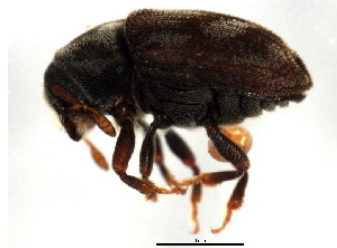

**BIOUG00874-D11 [Lateral]**  
*Hylesinus aculeatus*  
 Family: Curculionidae  
 BIN URI: BOLD:AAU7331

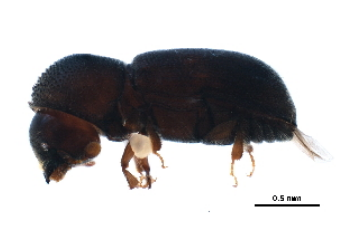

**BIOUG22354-D07 [Lateral]**  
 Curculionidae  
 Family: Curculionidae  
 BIN URI: BOLD:ACK1847

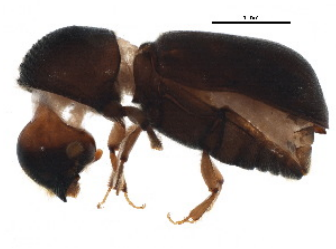

**BIOUG22422-C05 [Lateral]**  
 Curculionidae  
 Family: Curculionidae  
 BIN URI: BOLD:ACV3407

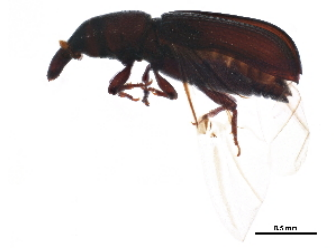

**BIOUG23320-C10 [Lateral]**  
 Curculionidae  
 Family: Curculionidae  
 BIN URI: BOLD:ACW1207

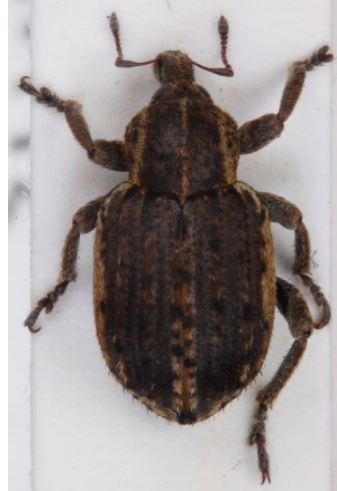

**ZMUO.010653 [Dorsal]**  
*Hypera zoilus*  
 Family: Curculionidae  
 BIN URI: BOLD:ABA6345

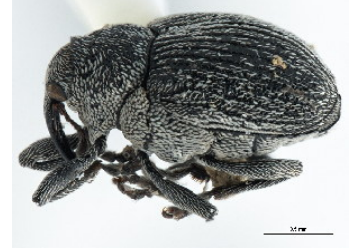

**CNC COLEO 00126878 [Lateral]**  
*Ceutorhynchus typhae*  
 Family: Curculionidae  
 BIN URI: BOLD:AAN9807

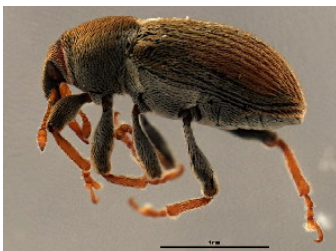

**BIOUG00669-E09 [Lateral]**  
*Tychius melloti*  
 Family: Curculionidae  
 BIN URI: BOLD:AAM7740

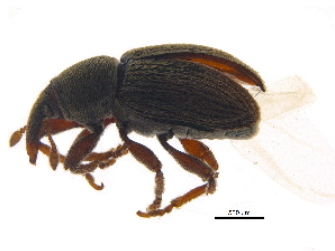

**BIOUG22578-B09 [Lateral]**  
 Curculionidae  
 Family: Curculionidae  
 BIN URI: BOLD:ACV3774

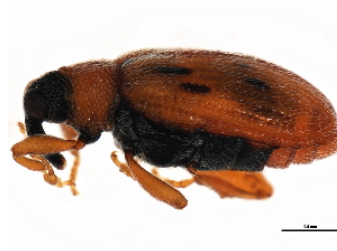

**10BBCOL-0013 [Lateral]**  
 Curculionidae  
 Family: Curculionidae  
 BIN URI: BOLD:AAM7726

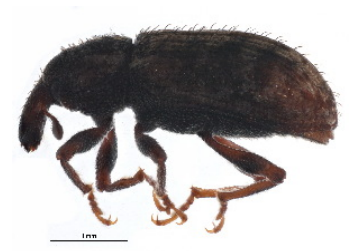

**BIOUG22580-F02 [Lateral]**  
 Curculionidae  
 Family: Curculionidae  
 BIN URI: BOLD:ABW8698



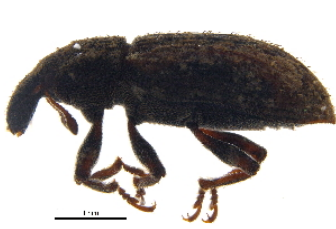

**BIOUG21883-E05 [Lateral]**  
Curculionidae  
Family: Curculionidae  
BIN URI: BOLD:ACJ0010

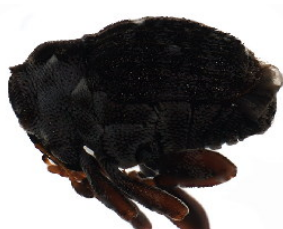

**BIOUG00874-F08 [Lateral]**  
Curculionidae  
Family: Curculionidae  
BIN URI: BOLD:ABA6338

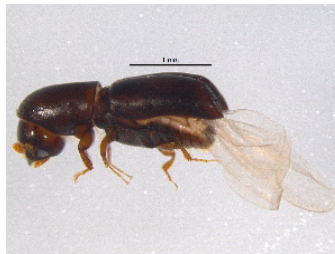

**BIOUG05699-H07 [Lateral]**  
Monarthrum mali  
Family: Curculionidae  
BIN URI: BOLD:ACD0202

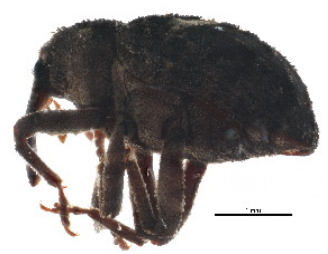

**BIOUG22354-C08 [Lateral]**  
Curculionidae  
Family: Curculionidae  
BIN URI: BOLD:ACV4031

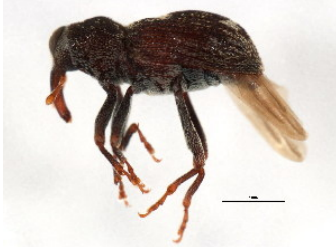

**BIOUG00818-B01 [Lateral]**  
Acoptus suturalis  
Family: Curculionidae  
BIN URI: BOLD:AAU6930

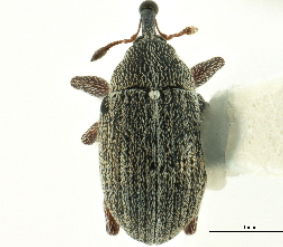

**CCDB-22983-A02 [Dorsal]**  
Anthonomus  
Family: Curculionidae  
BIN URI: BOLD:AAZ2616

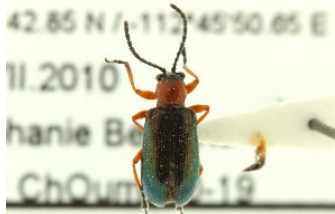

**CNC COLEO 00123332 [Dorsal]**  
Oulema duftschmidti  
Family: Chrysomelidae  
BIN URI: BOLD:AAK5928

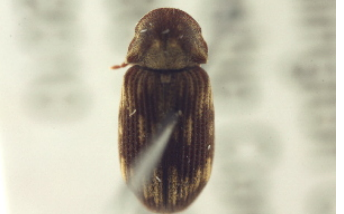

**10PHMAL-2424 [Dorsal]**  
Hadrobregmus notatus  
Family: Ptinidae  
BIN URI: BOLD:AAP8586

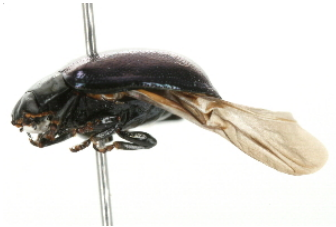

**09BBECO-0271 [Lateral]**  
Plagioderia versicolora  
Family: Chrysomelidae  
BIN URI: BOLD:AAG4477

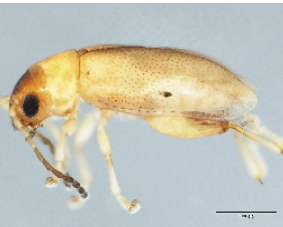

**09BBECO-0399 [Lateral]**  
Longitarsus testaceus  
Family: Chrysomelidae  
BIN URI: BOLD:AAP8332

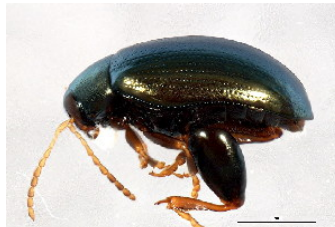

**BIOUG00818-E08 [Lateral]**  
Dibolia borealis  
Family: Chrysomelidae  
BIN URI: BOLD:AAL0908

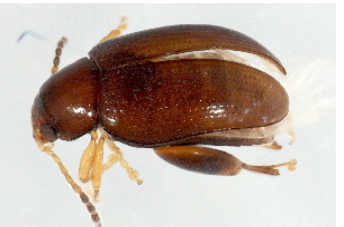

**BIOUG01593-A01 [Lateral]**  
Psyllodes picinus  
Family: Chrysomelidae  
BIN URI: BOLD:AAP8162

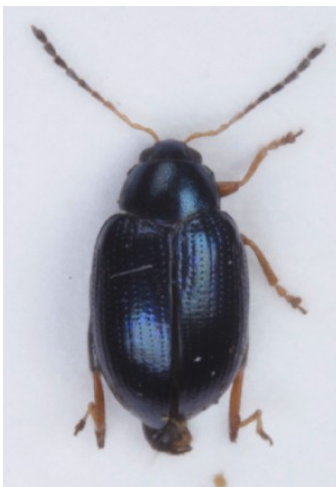

**ZMUO.007494 [Dorsal]**  
Psyllodes napi  
Family: Chrysomelidae  
BIN URI: BOLD:ABA4532

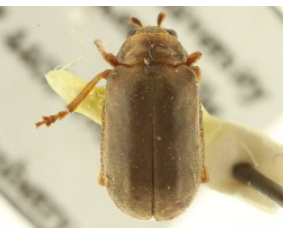

**CNC COLEO 00151503 [Dorsal]**  
Pyrrhalta viburni  
Family: Chrysomelidae  
BIN URI: BOLD:AAL1083

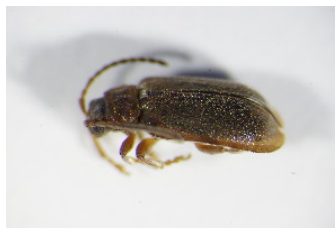

**BFB\_CoL\_FK\_9282 [Dorsal]**  
Neogalerucella pusilla  
Family: Chrysomelidae  
BIN URI: BOLD:AAL2945

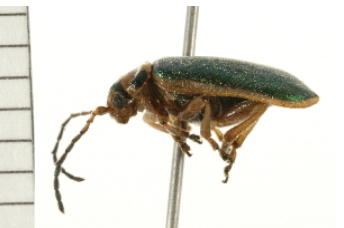

**08BBCOL-0455 [Lateral]**  
Tirihabda borealis  
Family: Chrysomelidae  
BIN URI: BOLD:AAG4458

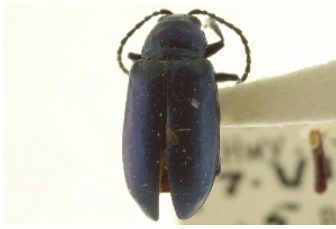

**CNC COLEO 00151711 [Dorsal]**

*Altica subplicata*  
Family: Chrysomelidae  
BIN URI: BOLD:AAG4462

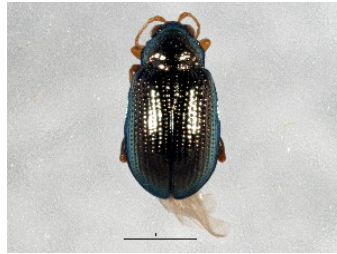

**BIOUG01641-A09 [Dorsal]**

*Crepidodera*  
Family: Chrysomelidae  
BIN URI: BOLD:ABA9095

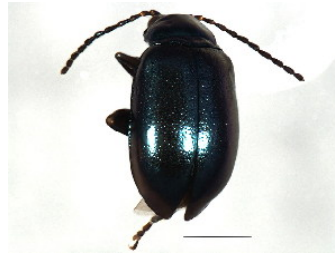

**BIOUG00874-B12 [Dorsal]**

*Altica chalybea*  
Family: Chrysomelidae  
BIN URI: BOLD:AAH0273

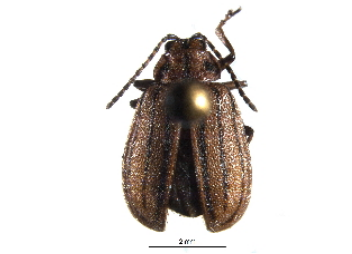

**BIOUG05513-F07 [Dorsal]**

*Ophraella conferta*  
Family: Chrysomelidae  
BIN URI: BOLD:ACF8270

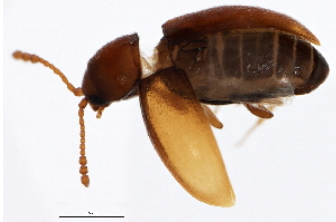

**PROBE-TW0487 [Dorsal]**

*Atomaria CHU2*  
Family: Cryptophagidae  
BIN URI: BOLD:AAG5060

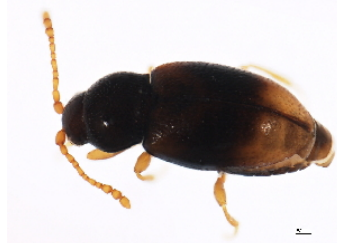

**10PCCOL-0069 [Dorsal]**

*Atomaria ephippiata*  
Family: Cryptophagidae  
BIN URI: BOLD:AAP7030

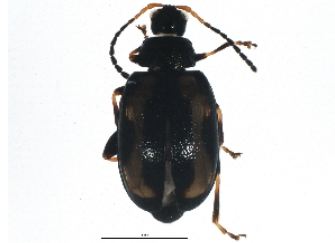

**BIOUG05520-C10 [Dorsal]**

*Phyllotreta striolata*  
Family: Chrysomelidae  
BIN URI: BOLD:AAL5267

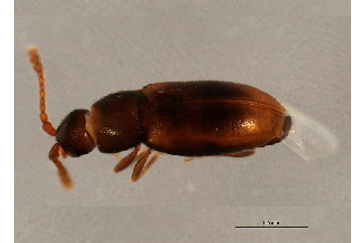

**BIOUG00669-B08 [Dorsal]**

*Atomaria*  
Family: Cryptophagidae  
BIN URI: BOLD:AAU7170

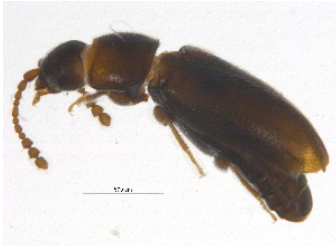

**BIOUG05032-A03 [Lateral]**

*Atomaria*  
Family: Cryptophagidae  
BIN URI: BOLD:ACG3394

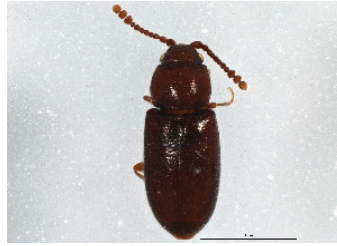

**BIOUG06180-H01 [Dorsal]**

*Atomaria*  
Family: Cryptophagidae  
BIN URI: BOLD:ACI5062

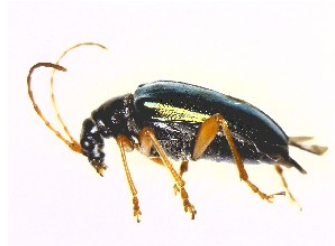

**BIOUG06758-H09 [Lateral]**

*Gaurotes cyanipennis*  
Family: Cerambycidae  
BIN URI: BOLD:AAI7042

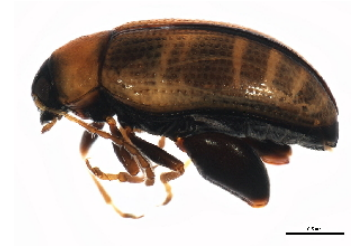

**10PHMAL-0281 [Lateral]**

*Psyllodes affinis*  
Family: Chrysomelidae  
BIN URI: BOLD:AAU6967

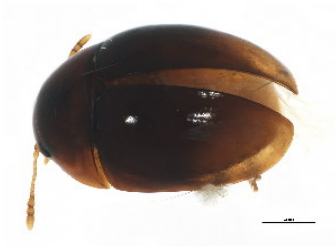

**BIOUG02321-H08 [Lateral]**

*Stilbus apicalis*  
Family: Phalacridae  
BIN URI: BOLD:AAH0134

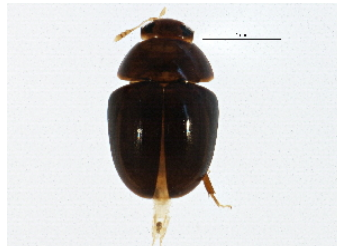

**BIOUG05600-F04 [Dorsal]**

*Acylomus pugetanus*  
Family: Phalacridae  
BIN URI: BOLD:AAH0135

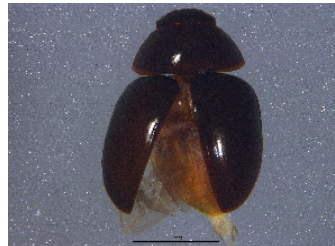

**BIOUG12062-F10 [Dorsal]**

Phalacridae  
Family: Phalacridae  
BIN URI: BOLD:ACM7465

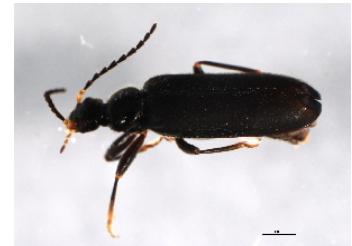

**AY165670 [Dorsal]**

*Pedilus* sp. SLB-2003  
Family: Pyrochroidae  
BIN URI: BOLD:AAH0127

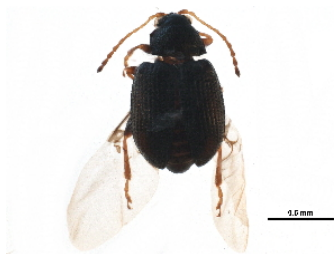

**BIOUG22575-B07 [Dorsal]**  
*Epitrix cucumeris*  
 Family: Chrysomelidae  
 BIN URI: BOLD:ABA9101

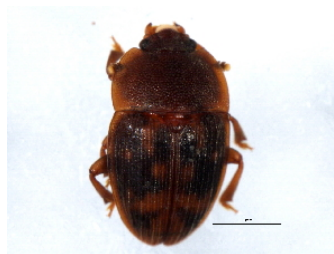

**TDWG-0664 [Dorsal]**  
 Nitidulidae  
 Family: Nitidulidae  
 BIN URI: BOLD:AAH0115

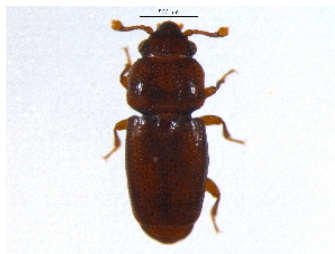

**BIOUG02943-B05 [Dorsal]**  
 Monotomidae  
 Family: Monotomidae  
 BIN URI: BOLD:ACA5543

IMAGE NOT AVAILABLE

**BIOUG22422-D11**  
 Monotomidae  
 Family: Monotomidae

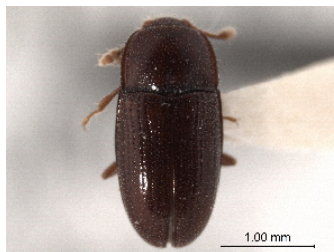

**CNC COLEO 00160046 [Dorsal]**  
*Philothermus glabriculus*  
 Family: Corylonidae  
 BIN URI: BOLD:ABX9329

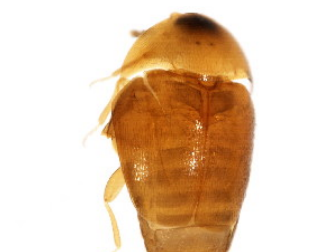

**BIOUG00993-F05 [Dorsal]**  
*Sericoderus lateralis*  
 Family: Corylophidae  
 BIN URI: BOLD:ABA2914

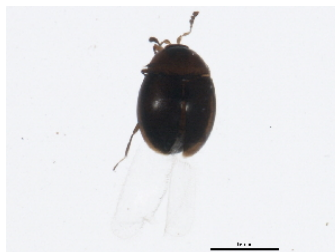

**BIOUG00873-D09 [Dorsal]**  
 Corylophidae  
 Family: Corylophidae  
 BIN URI: BOLD:AAU7040

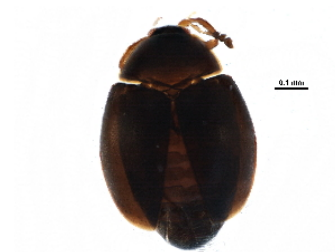

**BIOUG22354-D08 [Dorsal]**  
 Orthoperus  
 Family: Corylophidae  
 BIN URI: BOLD:ACC5439

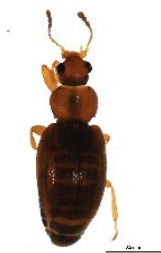

**BIOUG01144-C03 [Dorsal]**  
 Corticarina  
 Family: Latridiidae  
 BIN URI: BOLD:AAH0256

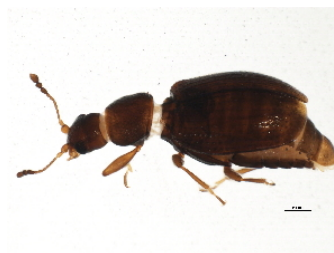

**BIOUG05559-F11 [Lateral]**  
 Latridiidae  
 Family: Latridiidae  
 BIN URI: BOLD:ACF8198

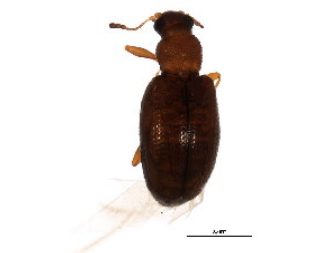

**BIOUG01144-A11 [Dorsal]**  
*Corticara gibbosa*  
 Family: Latridiidae  
 BIN URI: BOLD:AAI8935

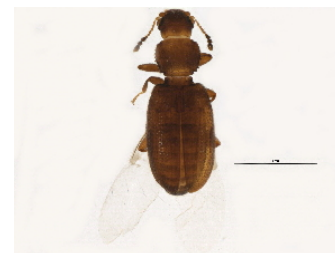

**BIOUG08721-B02 [Dorsal]**  
 Latridiidae  
 Family: Latridiidae  
 BIN URI: BOLD:ACK2360

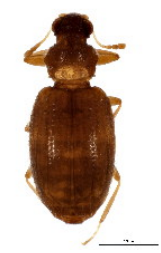

**BIOUG01502-A08 [Dorsal]**  
*Melanophthalma*  
 Family: Latridiidae  
 BIN URI: BOLD:AAM7680

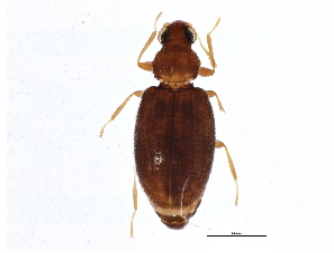

**BIOUG03260-D04 [Dorsal]**  
*Melanophthalma*  
 Family: Latridiidae  
 BIN URI: BOLD:ABX1677

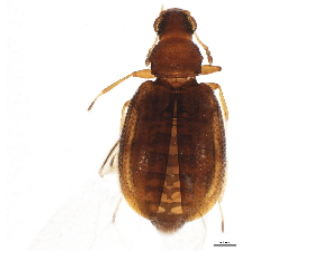

**BIOUG05509-H09 [Dorsal]**  
 Corticaria  
 Family: Latridiidae  
 BIN URI: BOLD:AAH6154

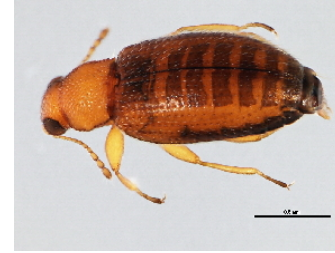

**10PCCOL-0062 [Dorsal]**  
*Melanophthalma*  
 Family: Latridiidae  
 BIN URI: BOLD:AAP7026

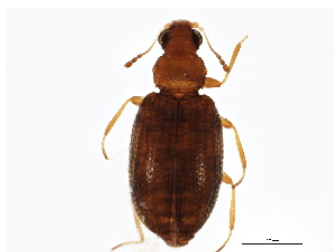

**BIOUG02418-G05 [Dorsal]**  
 Corticaria  
 Family: Latridiidae  
 BIN URI: BOLD:ABA9093

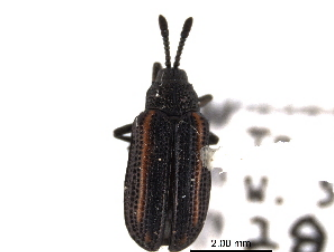

**CNC COLEO 00152017 [Dorsal]**  
*Microrhopala vittata*  
 Family: Chrysomelidae  
 BIN URI: BOLD:AAH0112

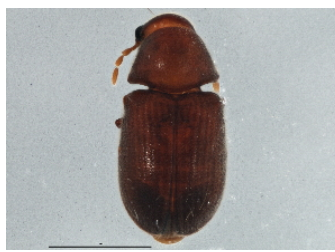

**BIOUG07026-G02 [Dorsal]**  
 Curculionidae  
 Family: Curculionidae  
 BIN URI: BOLD:ACC1644

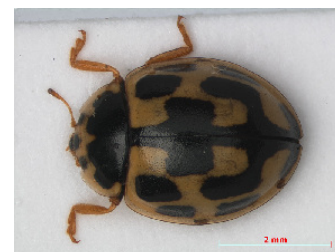

**RMNH.INS.535971 [Dorsal]**  
*Propylaea quatuordecimpunctata*  
 Family: Coccinellidae  
 BIN URI: BOLD:AAF6935

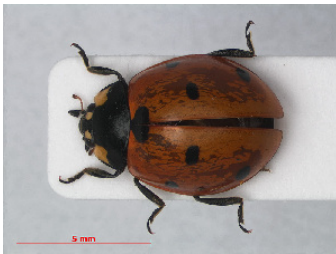

**RMNH.INS.535983 [Dorsal]**  
*Coccinella septempunctata*  
 Family: Coccinellidae  
 BIN URI: BOLD:AAA8933

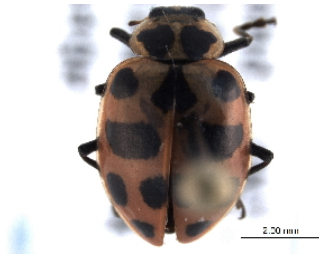

**CNC COLEO 00154256 [Dorsal]**  
*Coleomegilla maculata lengi*  
 Family: Coccinellidae  
 BIN URI: BOLD:AAD7604

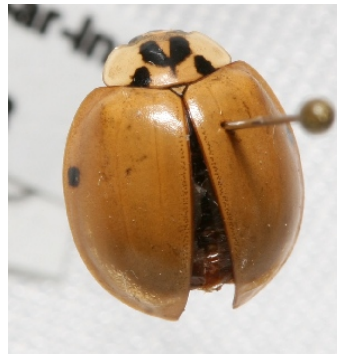

**CNC COLEO 00154299 [Dorsal]**  
*Hippodamia glacialis glacialis*  
 Family: Coccinellidae  
 BIN URI: BOLD:AAH3305

**MACN-Bar-Ins-ct 288 [Dorsal]**  
 Coccinellidae  
 Family: Coccinellidae  
 BIN URI: BOLD:AAB5640

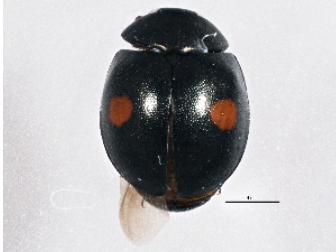

**BIOUG05673-A07 [Dorsal]**  
*Hyperaspis binotata*  
 Family: Coccinellidae  
 BIN URI: BOLD:AAAN6147

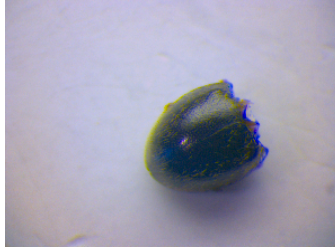

**BFB\_Co\_FK\_4209 [Dorsal]**  
*Stethorus punctillum*  
 Family: Coccinellidae  
 BIN URI: BOLD:AAAN6149

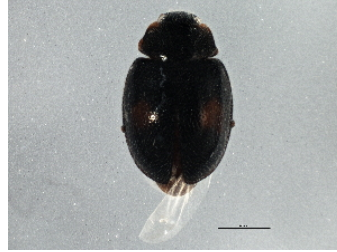

**BIOUG03648-D03 [Dorsal]**  
 Scymnus  
 Family: Coccinellidae  
 BIN URI: BOLD:ACC1509

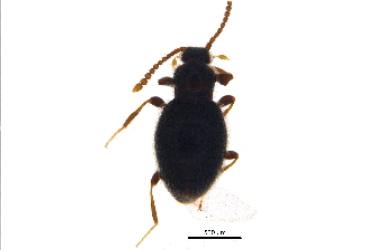

**BIOUG22296-G02 [Dorsal]**  
*Stenichnus scutellaris*  
 Family: Staphylinidae  
 BIN URI: BOLD:AAAN9916

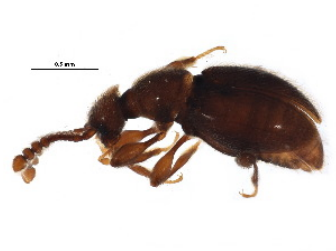

**BIOUG20572-F04 [Lateral]**  
 Staphylinidae  
 Family: Staphylinidae  
 BIN URI: BOLD:ACV4799

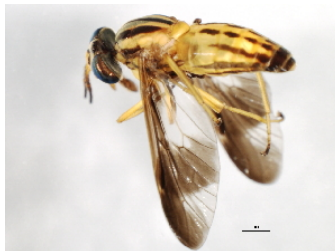

**09BBEDI-1210 [Lateral]**  
*Chrysops vittatus*  
 Family: Tabanidae  
 BIN URI: BOLD:AAB5367

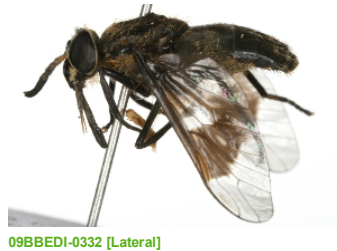

**09BBEDI-0332 [Lateral]**  
*Chrysops ater*  
 Family: Tabanidae  
 BIN URI: BOLD:ACE5640

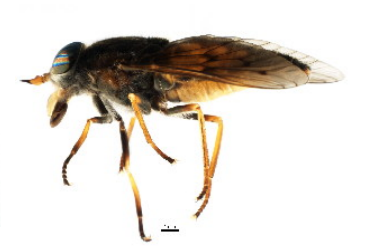

**BIOUG01427-C09 [Lateral]**  
 Tabanidae  
 Family: Tabanidae  
 BIN URI: BOLD:AAF0889

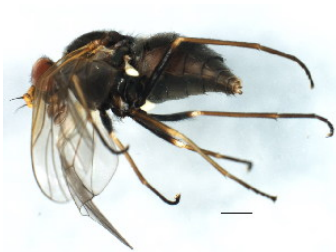

**BIOUG00825-B01 [Lateral]**  
 Symphoromyia  
 Family: Rhagionidae  
 BIN URI: BOLD:AAG5647

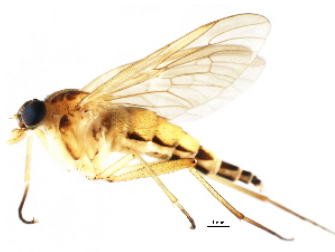

**BIOUG01475-A11 [Lateral]**  
 Rhagionidae  
 Family: Rhagionidae  
 BIN URI: BOLD:AAH2953

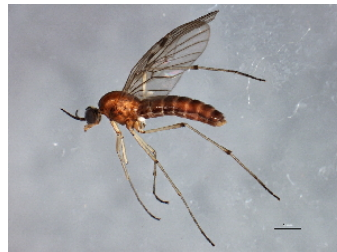

**08TTML-1134 [Lateral]**  
 Anisopodidae  
 Family: Anisopodidae  
 BIN URI: BOLD:AAG1998

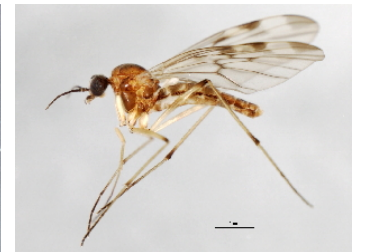

**DIPNO-0102 [Lateral]**  
 Anisopodidae  
 Family: Anisopodidae  
 BIN URI: BOLD:AAG1996

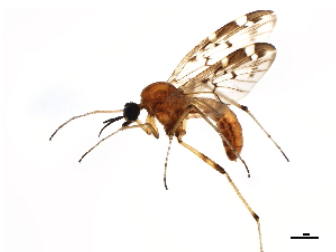

**BIOUG01544-C02 [Lateral]**  
 Anisopodidae  
 Family: Anisopodidae  
 BIN URI: BOLD:AAG2000

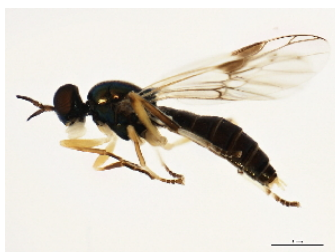

**10BBCDIP-3036 [Lateral]**  
 Beridinae  
 Family: Stratiomyidae  
 BIN URI: BOLD:AAAP7640

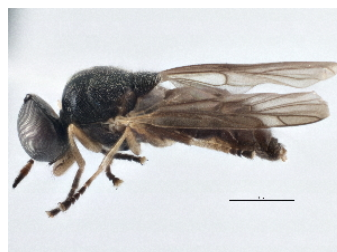

**CCDB-21411-G01 [Lateral]**  
 Allognosta fuscitarsis  
 Family: Stratiomyidae  
 BIN URI: BOLD:AAV1055

**IMAGE NOT AVAILABLE**

**BIOUG24002-H06**  
 Allognosta obscuriventris  
 Family: Stratiomyidae

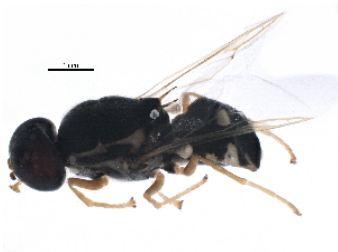

**BIOUG24020-D02 [Lateral]**  
Stratiomyidae  
Family: Stratiomyidae

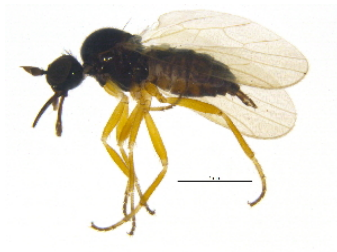

**BIOUG03246-H07 [Lateral]**  
Hybotidae  
Family: Hybotidae  
BIN URI: BOLD:AAF9826

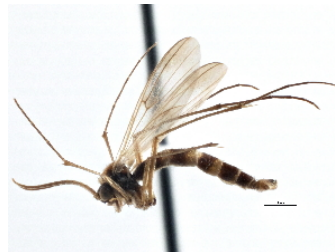

**CCDB-21402-G09 [Lateral]**  
Aglaomyia gatineau  
Family: Mycetophilidae  
BIN URI: BOLD:ABV3010

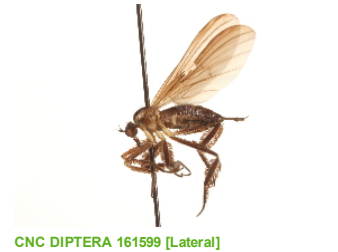

**CNC DIPTERA 161599 [Lateral]**  
Rhamphomyia longicauda  
Family: Empididae  
BIN URI: BOLD:AAF8462

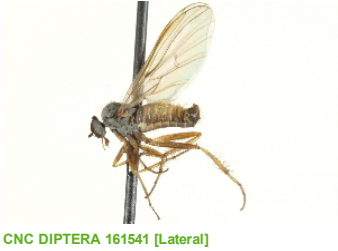

**CNC DIPTERA 161541 [Lateral]**  
Rhamphomyia sp. 9  
Family: Empididae  
BIN URI: BOLD:AAP2854

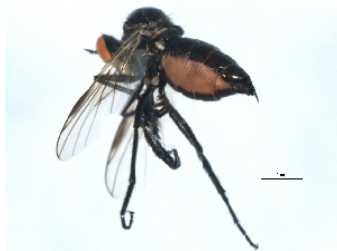

**10JSROW-0457 [Lateral]**  
Empididae  
Family: Empididae  
BIN URI: BOLD:AAP2857

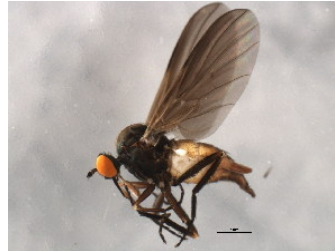

**10JSROW-1168 [Lateral]**  
Empididae  
Family: Empididae  
BIN URI: BOLD:AAQ0819

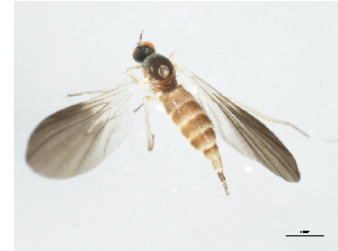

**10JSROW-1776 [Dorsal]**  
Rhamphomyia nr. depilis gr. sp. BJS8  
Family: Empididae  
BIN URI: BOLD:AAP2858

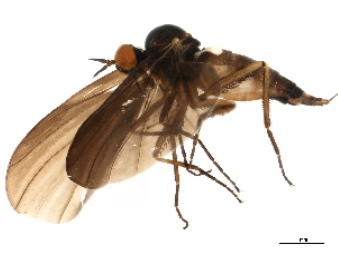

**BIOUG01428-G04 [Lateral]**  
Empididae  
Family: Empididae  
BIN URI: BOLD:ABW1189

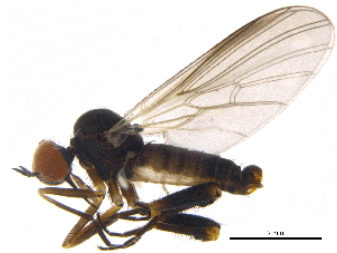

**BIOUG22325-G07 [Lateral]**  
Empididae  
Family: Empididae  
BIN URI: BOLD:AAF9756

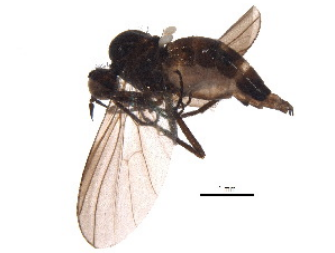

**BIOUG22356-H08 [Lateral]**  
Rhamphomyia  
Family: Empididae  
BIN URI: BOLD:ACV4054

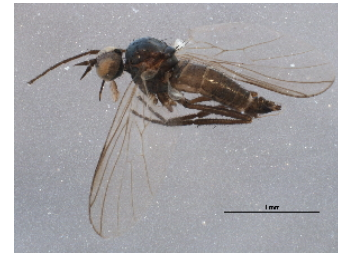

**BIOUG09586-G05 [Lateral]**  
Rhamphomyia  
Family: Empididae  
BIN URI: BOLD:ACL1493

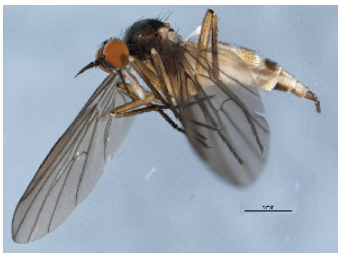

**10JSROW-0312 [Lateral]**  
Empididae  
Family: Empididae  
BIN URI: BOLD:AAP2855

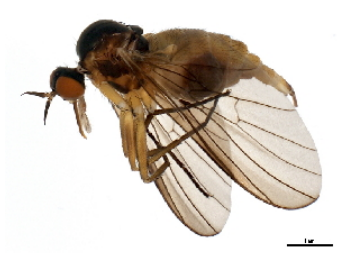

**10PHMAL-0871 [Lateral]**  
Rhamphomyia versicolor  
Family: Empididae  
BIN URI: BOLD:AAM7337

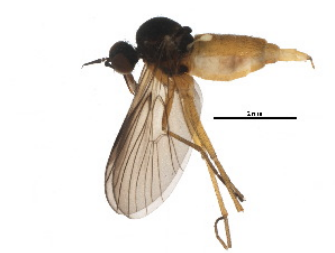

**BIOUG22324-B08 [Lateral]**  
Rhamphomyia  
Family: Empididae  
BIN URI: BOLD:ACV5478

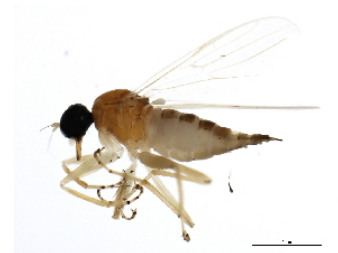

**PCPP10-0904 [Lateral]**  
Platypalpus melleus  
Family: Hybotidae  
BIN URI: BOLD:AAV3697

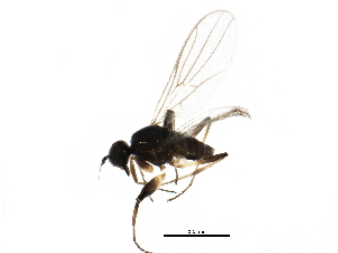

**BIOUG24027-D08 [Lateral]**  
Platypalpus niger  
Family: Hybotidae

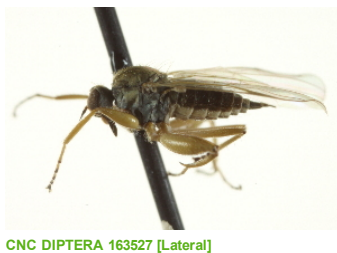

**CNC DIPTERA 163527 [Lateral]**  
Platypalpus sp. 17  
Family: Hybotidae  
BIN URI: BOLD:AAF9771

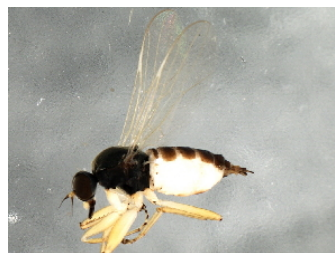

**08TTML-1569 [Lateral]**  
Platypalpus stabilis  
Family: Hybotidae  
BIN URI: BOLD:AAM6655

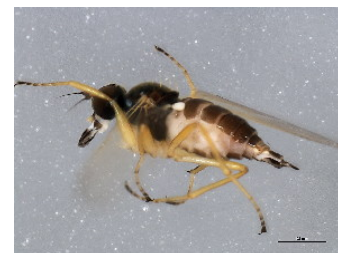

**10BBCDIP-0605 [Lateral]**  
Hybotidae  
Family: Hybotidae  
BIN URI: BOLD:AAF9789

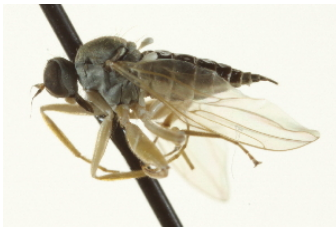

**CNC DIPTERA 163547 [Lateral]**  
 Platypalpus sp. 22  
 Family: Hybotidae  
 BIN URI: BOLD:AAF9768

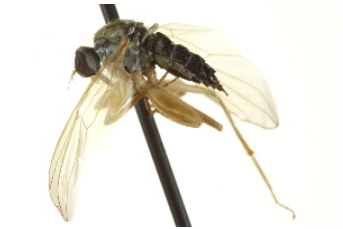

**CNC DIPTERA 163557 [Lateral]**  
 Platypalpus sp. 24  
 Family: Hybotidae  
 BIN URI: BOLD:AAF9772

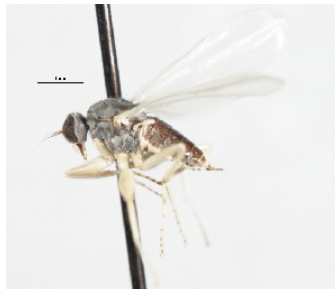

**CNC DIPTERA 105448 [Lateral]**  
 Platypalpus holosericus  
 Family: Hybotidae  
 BIN URI: BOLD:AAP6357

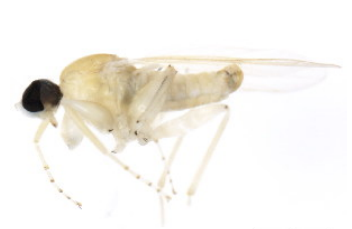

**BIOUG01347-B04 [Lateral]**  
 Hybotidae  
 Family: Hybotidae  
 BIN URI: BOLD:AAG6934

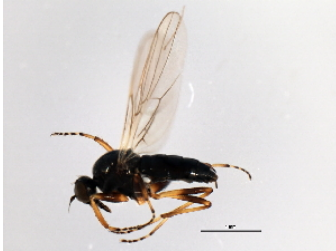

**08TTML-2020 [Lateral]**  
 Platypalpus  
 Family: Hybotidae  
 BIN URI: BOLD:AAN5505

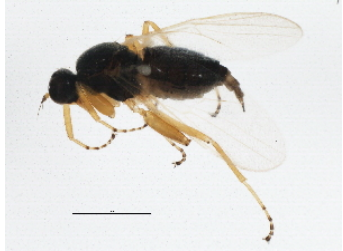

**BIOUG03341-B05 [Lateral]**  
 Hybotidae  
 Family: Hybotidae  
 BIN URI: BOLD:ACA7165

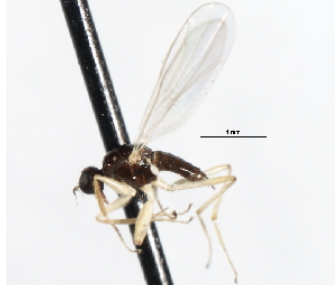

**CNC DIPTERA 105481 [Lateral]**  
 Platypalpus unguiculatus  
 Family: Hybotidae  
 BIN URI: BOLD:ABA0579

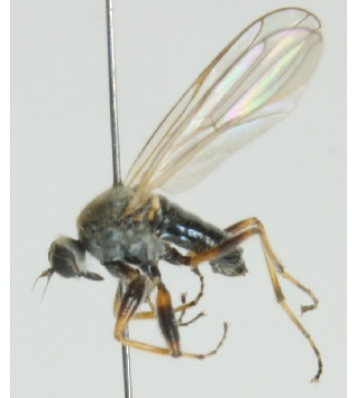

**jka10-00287 [Lateral]**  
 Platypalpus annulatus  
 Family: Hybotidae  
 BIN URI: BOLD:ACD3012

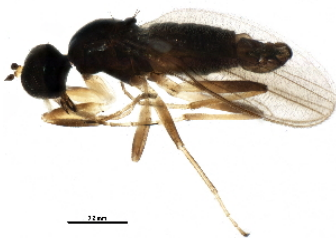

**BIOUG22366-A04 [Lateral]**  
 Hybotidae  
 Family: Hybotidae  
 BIN URI: BOLD:ACK3535

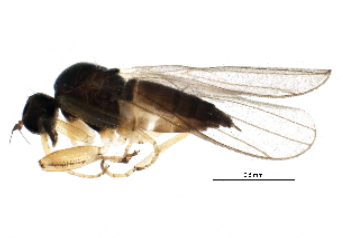

**BIOUG22084-E05 [Lateral]**  
 Platypalpus pulicarius  
 Family: Hybotidae  
 BIN URI: BOLD:AAQ0265

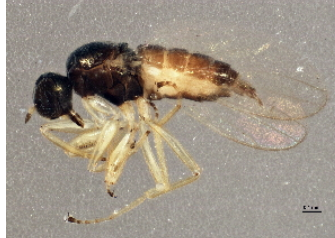

**BIOUG03451-D01 [Lateral]**  
 Hybotidae  
 Family: Hybotidae  
 BIN URI: BOLD:AAV3695

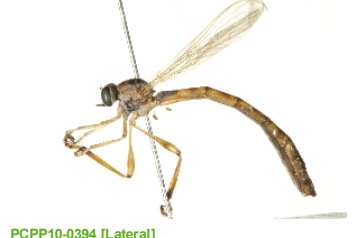

**PCPP10-0394 [Lateral]**  
 Asilidae  
 Family: Asilidae  
 BIN URI: BOLD:AAH2295

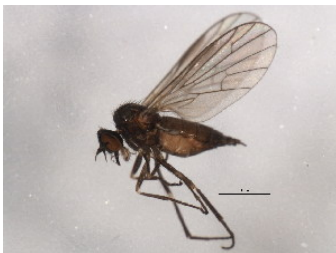

**10JSROW-1219 [Lateral]**  
 Empididae  
 Family: Empididae  
 BIN URI: BOLD:AAQ0818

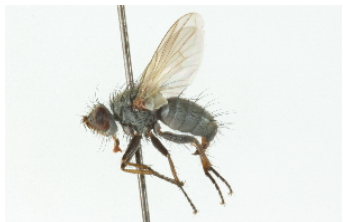

**CNC DIPTERA 104335 [Lateral]**  
 Campylocheeta teliosis  
 Family: Tachinidae  
 BIN URI: BOLD:AAZ4002

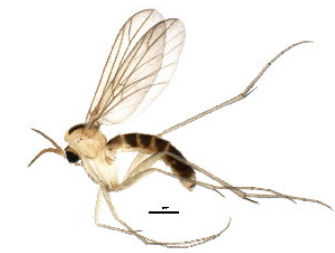

**BIOUG01356-B09 [Lateral]**  
 Ditomyiidae  
 Family: Ditomyiidae  
 BIN URI: BOLD:AAM8982

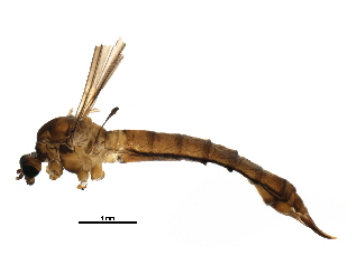

**BIOUG21895-C01 [Lateral]**  
 Limnophila  
 Family: Limoniidae  
 BIN URI: BOLD:ACV5288

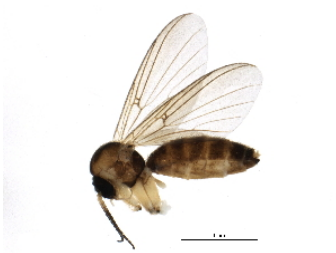

**BIOUG21589-D01 [Lateral]**  
 Mycetophilidae

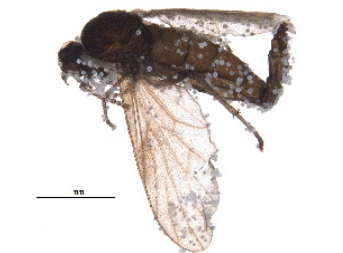

**BIOUG20569-G03 [Lateral]**  
 Bolbomyia nana

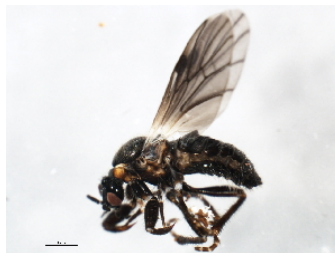

**09BBDIP-0719 [Lateral]**  
 Bibionidae

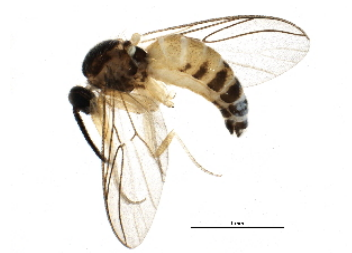

**BIOUG22362-D09 [Lateral]**  
 Mycetobia

Family: Mycetophilidae  
BIN URI: BOLD:ABV9017

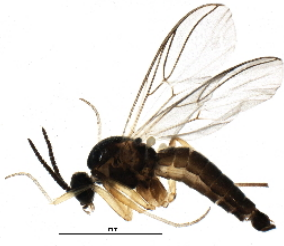

**BIOUG22362-E01 [Lateral]**  
Mycetobia  
Family: Anisopodidae  
BIN URI: BOLD:AAV4004

Family: Rhagionidae  
BIN URI: BOLD:ACV5660

IMAGE NOT AVAILABLE

**BIOUG22415-A12**  
Mycetobia  
Family: Anisopodidae

Family: Bibionidae  
BIN URI: BOLD:AAG6647

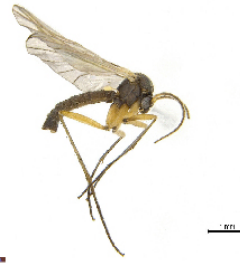

**TROM-TSZD-JKJ-100273 [Insect specimen]**  
Boletina palmata  
Family: Mycetophilidae  
BIN URI: BOLD:AAG4924

Family: Anisopodidae  
BIN URI: BOLD:AAV4005

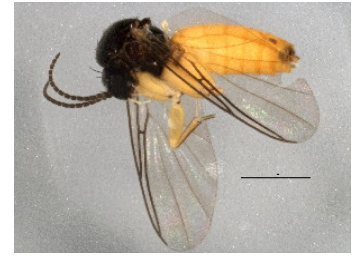

**BIOUG01645-H07 [Lateral]**  
Mycetophilidae  
Family: Mycetophilidae  
BIN URI: BOLD:AAG4923

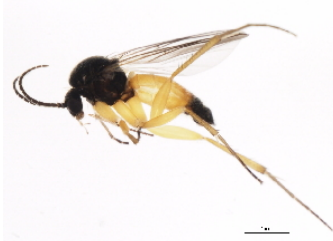

**09BBDIP-1684 [Lateral]**  
Mycetophilidae  
Family: Mycetophilidae  
BIN URI: BOLD:AAL9138

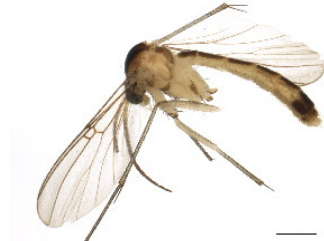

**BIOUG01983-C04 [Lateral]**  
Mycetophilidae  
Family: Mycetophilidae  
BIN URI: BOLD:AAG4890

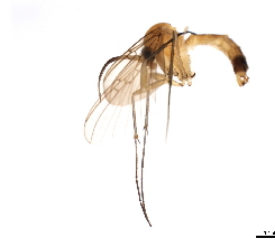

**09BBEDI-1515 [Lateral]**  
Mycetophilidae  
Family: Mycetophilidae  
BIN URI: BOLD:AAG4960

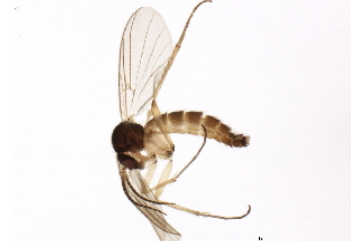

**BIOUG01659-E09 [Lateral]**  
Mycetophilidae  
Family: Mycetophilidae  
BIN URI: BOLD:AAG4871

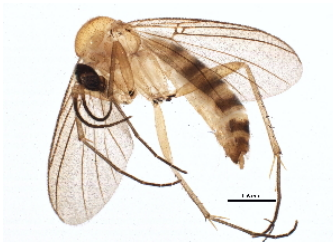

**BIOUG11150-G08 [Lateral]**  
Mycetophilidae  
Family: Mycetophilidae  
BIN URI: BOLD:ACM0350

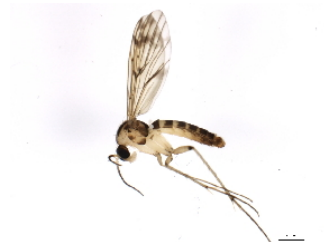

**BIOUG01373-D12 [Lateral]**  
Mycetophilidae  
Family: Mycetophilidae  
BIN URI: BOLD:AAG4898

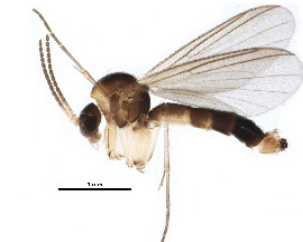

**BIOUG22291-E01 [Lateral]**  
Trichonta submaculata  
Family: Mycetophilidae  
BIN URI: BOLD:AAU4912

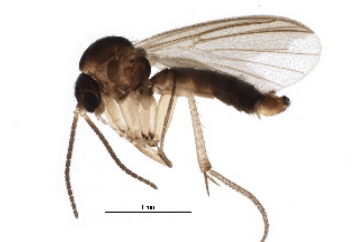

**BIOUG21770-E02 [Lateral]**  
Mycetophilidae  
Family: Mycetophilidae  
BIN URI: BOLD:ACD2208

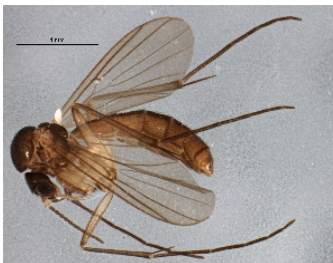

**BIOUG02965-F12 [Lateral]**  
Mycetophilidae  
Family: Mycetophilidae  
BIN URI: BOLD:ACA3795

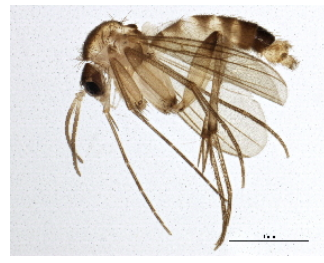

**BIOUG03069-C12 [Lateral]**  
Mycetophilidae  
Family: Mycetophilidae  
BIN URI: BOLD:ABV3021

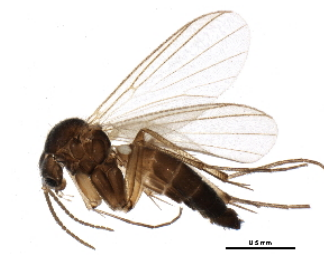

**BIOUG21590-F01 [Lateral]**  
Phronia  
Family: Mycetophilidae  
BIN URI: BOLD:AAL4861

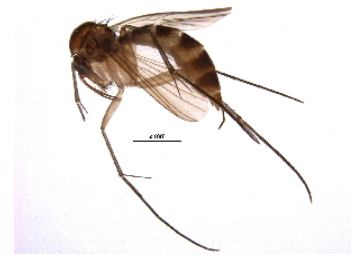

**BIOUG09307-F12 [Lateral]**  
Mycetophilidae  
Family: Mycetophilidae  
BIN URI: BOLD:ACL0109

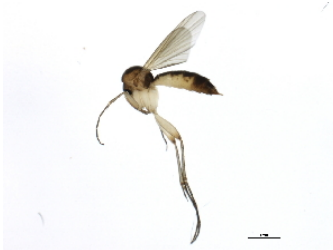

**BIOUG01772 [Lateral]**  
 Mycetophilidae  
 Family: Mycetophilidae  
 BIN URI: BOLD:AAP2527

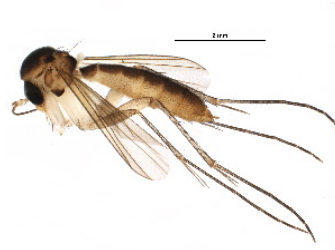

**BIOUG22324-G09 [Lateral]**  
 Mycetophilidae  
 Family: Mycetophilidae  
 BIN URI: BOLD:AAP4733

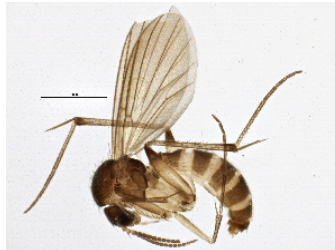

**BIOUG03030-H11 [Lateral]**  
 Mycetophilidae  
 Family: Mycetophilidae  
 BIN URI: BOLD:AAN8585

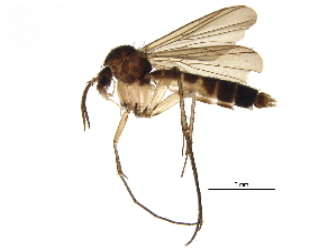

**BIOUG06129-F02 [Lateral]**  
 Mycetophilidae  
 Family: Mycetophilidae  
 BIN URI: BOLD:AAG4972

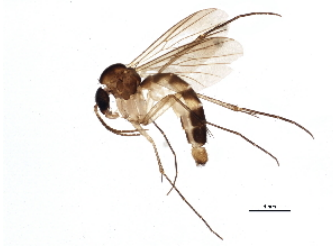

**BIOUG04070-B01 [Lateral]**  
 Mycetophilidae  
 Family: Mycetophilidae  
 BIN URI: BOLD:ACD0959

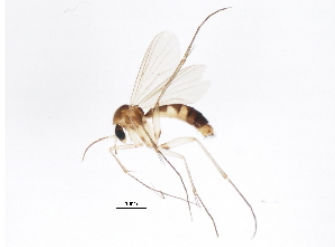

**BIOUG01626 [Lateral]**  
 Mycetophilidae  
 Family: Mycetophilidae  
 BIN URI: BOLD:AAM8991

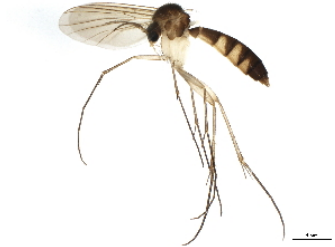

**BIOUG01392-H11 [Lateral]**  
 Mycetophilidae  
 Family: Mycetophilidae  
 BIN URI: BOLD:AAN8592

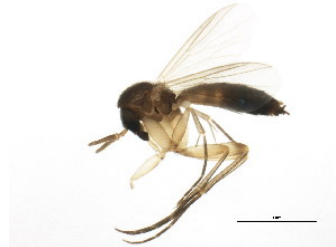

**BIOUG01343-B01 [Lateral]**  
 Mycetophilidae  
 Family: Mycetophilidae  
 BIN URI: BOLD:ABU5545

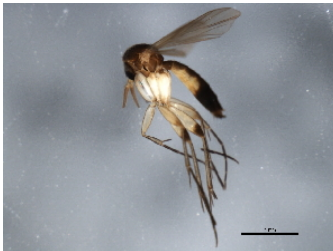

**09BBEDI-2498 [Lateral]**  
 Cordyla  
 Family: Mycetophilidae  
 BIN URI: BOLD:ABV9015

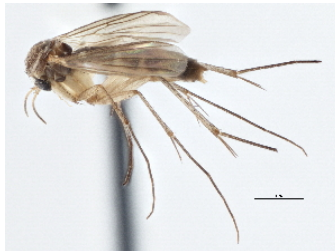

**CCDB-21411-A04 [Lateral]**  
 Exechia attrita  
 Family: Mycetophilidae  
 BIN URI: BOLD:ACM3454

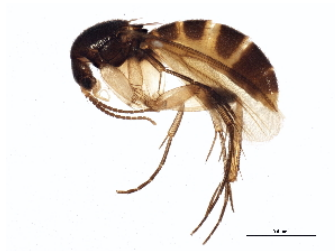

**BIOUG02965-E11 [Lateral]**  
 Sceptonia  
 Family: Mycetophilidae  
 BIN URI: BOLD:AAG4967

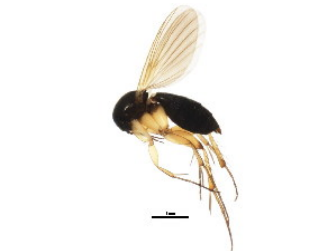

**BIOUG01931-F04 [Lateral]**  
 Mycetophila caudata  
 Family: Mycetophilidae  
 BIN URI: BOLD:AAJ0565

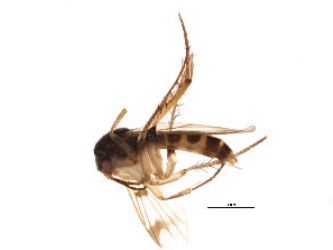

**BIOUG01670-A03 [Lateral]**  
 Mycetophilidae  
 Family: Mycetophilidae  
 BIN URI: BOLD:AAG4953

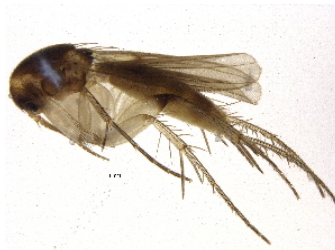

**BIOUG03638-H11 [Lateral]**  
 Mycetophilidae  
 Family: Mycetophilidae  
 BIN URI: BOLD:AAN8587

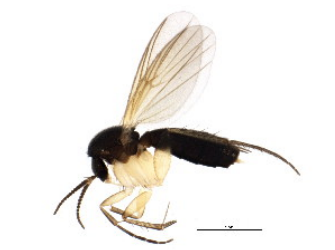

**BIOUG01689-C10 [Lateral]**  
 Mycetophilidae  
 Family: Mycetophilidae  
 BIN URI: BOLD:AAU4913

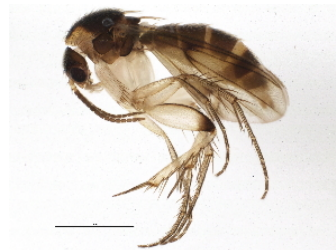

**BIOUG02936-C11 [Lateral]**  
 Mycetophila caudata  
 Family: Mycetophilidae  
 BIN URI: BOLD:AAI3260

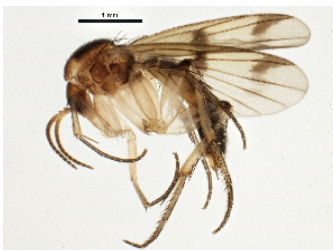

**BIOUG05581-H09 [Lateral]**  
 Mycetophila  
 Family: Mycetophilidae  
 BIN URI: BOLD:AAP8158

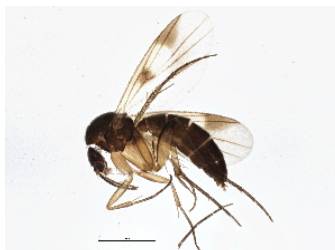

**BIOUG06361-F02 [Lateral]**  
 Zygomyia zaitzevi  
 Family: Mycetophilidae  
 BIN URI: BOLD:ABW9135

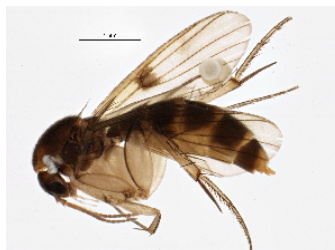

**BIOUG03066-G09 [Lateral]**  
 Epicypta  
 Family: Mycetophilidae  
 BIN URI: BOLD:ACA3426

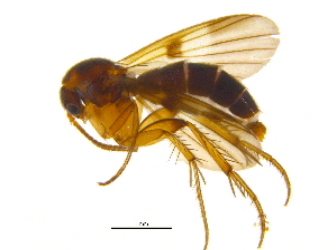

**BIOUG04655-H05 [Lateral]**  
 Epicypta  
 Family: Mycetophilidae  
 BIN URI: BOLD:ACC5656



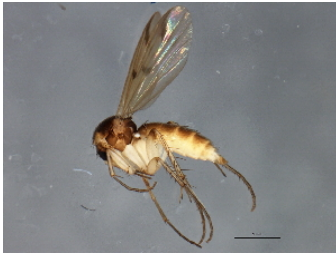

**08TTML-1057 [Lateral]**  
 Mycetophilidae  
 Family: Mycetophilidae  
 BIN URI: BOLD:AAG4922

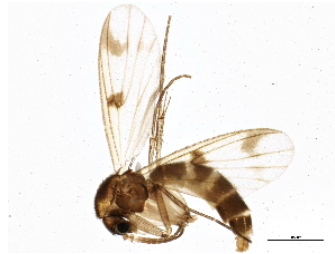

**BIOUG03669-E10 [Lateral]**  
 Mycetophilidae  
 Family: Mycetophilidae  
 BIN URI: BOLD:ACC2284

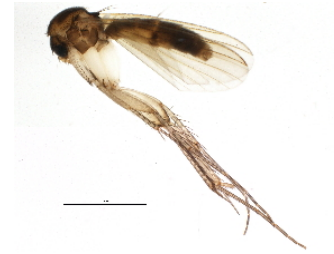

**BIOUG02975-E01 [Lateral]**  
 Mycetophilidae  
 Family: Mycetophilidae  
 BIN URI: BOLD:AAM8964

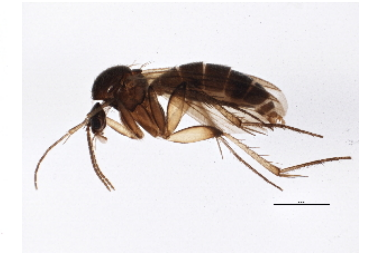

**BIOUG05033-H06 [Lateral]**  
 Mycetophila  
 Family: Mycetophilidae  
 BIN URI: BOLD:ABA6478

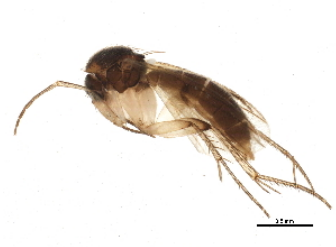

**BIOUG10842-H10 [Lateral]**  
 Mycetophila  
 Family: Mycetophilidae  
 BIN URI: BOLD:ACK1664

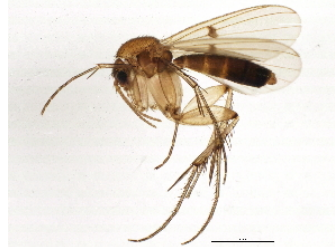

**BIOUG03039-A10 [Lateral]**  
 Mycetophilidae  
 Family: Mycetophilidae  
 BIN URI: BOLD:AAM8980

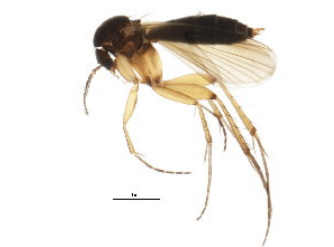

**BIOUG01931-E12 [Lateral]**  
 Mycetophilidae  
 Family: Mycetophilidae  
 BIN URI: BOLD:AAG4893

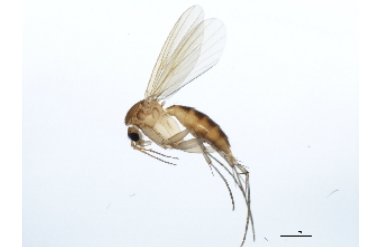

**10BBDIP-2271 [Lateral]**  
 Mycetophilidae  
 Family: Mycetophilidae  
 BIN URI: BOLD:AAG4908

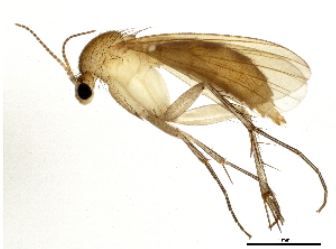

**BIOUG02739-G07 [Lateral]**  
 Mycetophila fungorum  
 Family: Mycetophilidae  
 BIN URI: BOLD:ACF2821

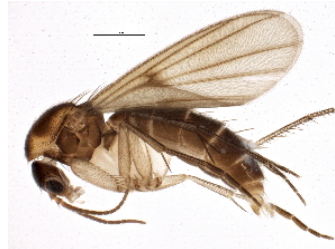

**BIOUG02987-A04 [Lateral]**  
 Mycetophilidae  
 Family: Mycetophilidae  
 BIN URI: BOLD:ACA4089

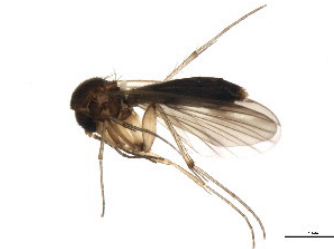

**BIOUG01347-G09 [Lateral]**  
 Mycetophilidae  
 Family: Mycetophilidae  
 BIN URI: BOLD:AAP4734

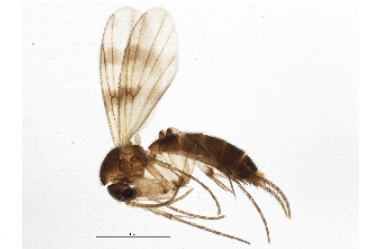

**BIOUG02936-E07 [Lateral]**  
 Mycetophila  
 Family: Mycetophilidae  
 BIN URI: BOLD:AAG4907

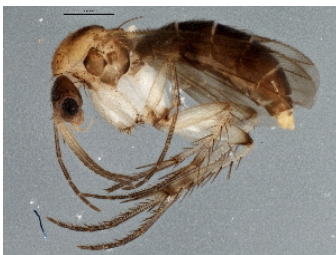

**BIOUG02987-B05 [Lateral]**  
 Mycetophila  
 Family: Mycetophilidae  
 BIN URI: BOLD:ABV9019

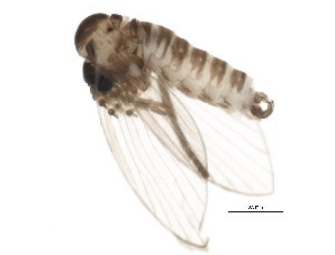

**BIOUG01307-E03 [Lateral]**  
 Psychodidae  
 Family: Psychodidae  
 BIN URI: BOLD:AAN8769

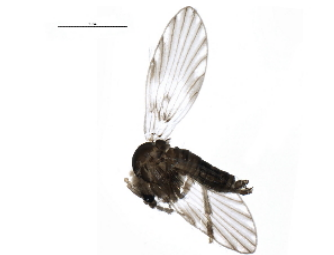

**10JSROW-1107 [Lateral]**  
 Psychodidae  
 Family: Psychodidae  
 BIN URI: BOLD:ACQ6228

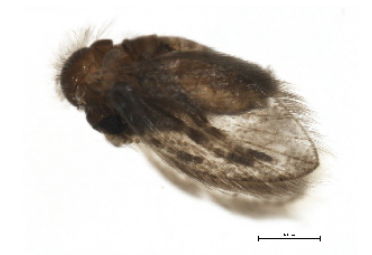

**09BBDIP-1459 [Lateral]**  
 Psychodidae  
 Family: Psychodidae  
 BIN URI: BOLD:AAF9310

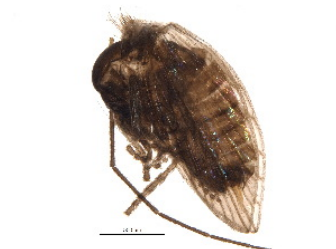

**BIOUG20764-A01 [Lateral]**  
 Diptera  
 BIN URI: BOLD:ACU3012

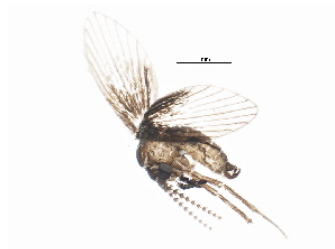

**10JSROW-1769 [Lateral]**  
 Psychodidae  
 Family: Psychodidae  
 BIN URI: BOLD:AAN8771

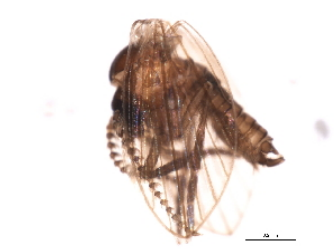

**09BBEDI-2826 [Lateral]**  
 Psychodidae  
 Family: Psychodidae  
 BIN URI: BOLD:AAF9319

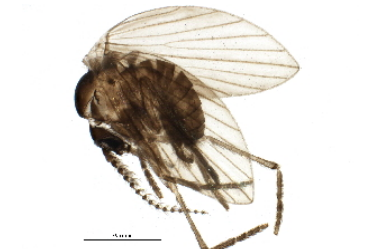

**BIOUG22366-C06 [Lateral]**  
 Psychodidae  
 Family: Psychodidae  
 BIN URI: BOLD:AAU6540

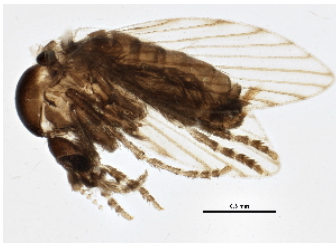

**BIOUG03369-F09 [Lateral]**  
Psychodidae  
Family: Psychodidae  
BIN URI: BOLD:ABW1323

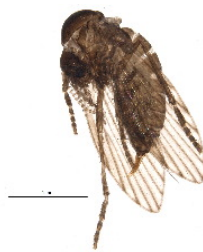

**BIOUG20846-A07 [Lateral]**  
Diptera  
BIN URI: BOLD:ACU7066

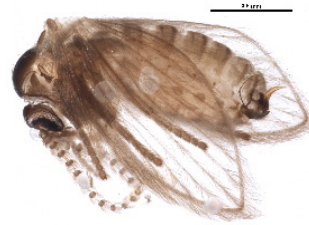

**BIOUG08005-H09 [Lateral]**  
Psychoda sp.  
Family: Psychodidae  
BIN URI: BOLD:AAF9314

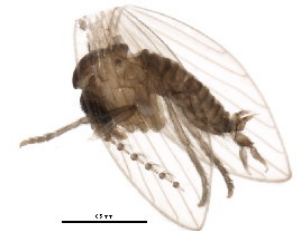

**BIOUG01345-G01 [Lateral]**  
Psychodidae  
Family: Psychodidae  
BIN URI: BOLD:ABV1314

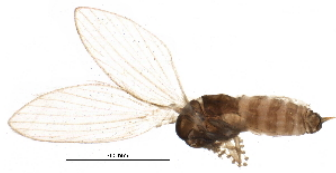

**BIOUG22299-E06 [Lateral]**  
Psychoda  
Family: Psychodidae  
BIN URI: BOLD:AAF9316

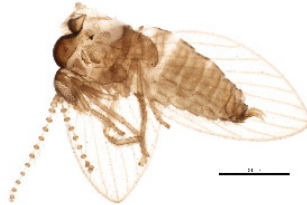

**BIOUG01666-C01 [Lateral]**  
Psychodidae  
Family: Psychodidae  
BIN URI: BOLD:AAF9311

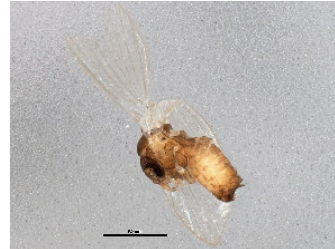

**BIOUG01929-D07 [Lateral]**  
Psychodidae  
Family: Psychodidae  
BIN URI: BOLD:AAL7815

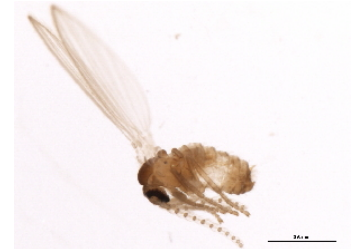

**08TTML-2230 [Lateral]**  
Psychodidae  
Family: Psychodidae  
BIN URI: BOLD:AAN8770

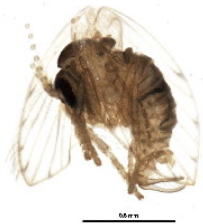

**BIOUG01307-F03 [Lateral]**  
Psychodidae  
Family: Psychodidae  
BIN URI: BOLD:AAP4581

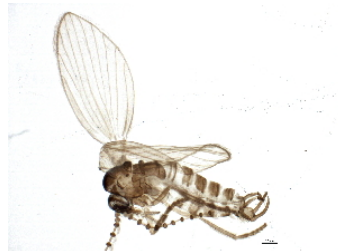

**BIOUG04254-B06 [Lateral]**  
Psychoda  
Family: Psychodidae  
BIN URI: BOLD:AAF9317

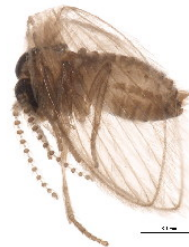

**BIOUG01400-E12 [Lateral]**  
Psychodidae  
Family: Psychodidae  
BIN URI: BOLD:ABU5546

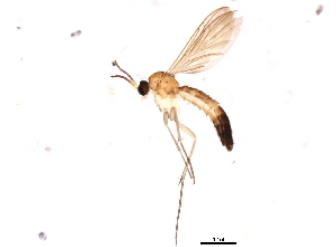

**09BBEDI-2897 [Lateral]**  
Keroplastidae  
Family: Psychodidae  
BIN URI: BOLD:AAG4979

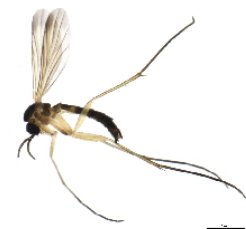

**10JSROW-1778 [Lateral]**  
Keroplastidae  
Family: Keroplastidae  
BIN URI: BOLD:AAP2528

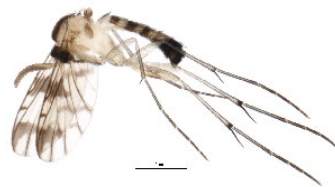

**BIOUG01356-C06 [Lateral]**  
Keroplastidae  
Family: Keroplastidae  
BIN URI: BOLD:AAG4951

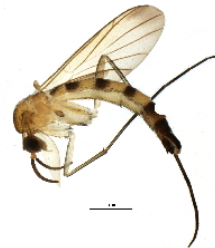

**BIOUG10369-C10 [Lateral]**  
Keroplastidae  
Family: Keroplastidae  
BIN URI: BOLD:ACL5302

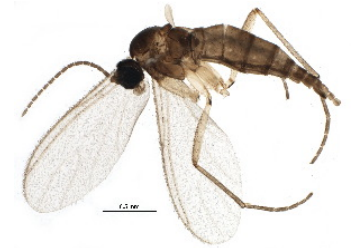

**BIOUG22467-A09 [Lateral]**  
Sciaridae  
Family: Sciaridae  
BIN URI: BOLD:ACC2619

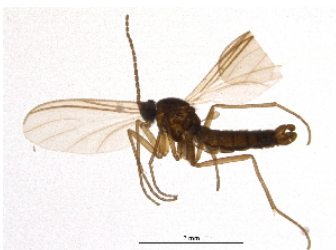

**BIOUG04563-C10 [Lateral]**  
Sciaridae  
Family: Sciaridae  
BIN URI: BOLD:ACD8833

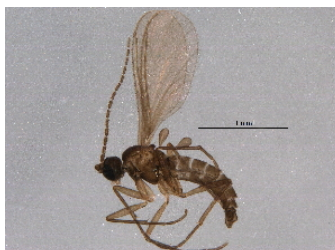

**BIOUG10575-C09 [Lateral]**  
Sciaridae  
Family: Sciaridae  
BIN URI: BOLD:ACL7902

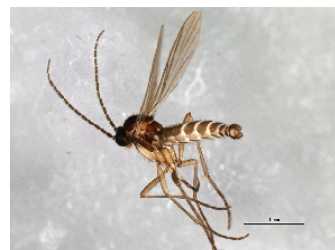

**08TTML-1508 [Lateral]**  
Sciaridae  
Family: Sciaridae  
BIN URI: BOLD:AAN6439

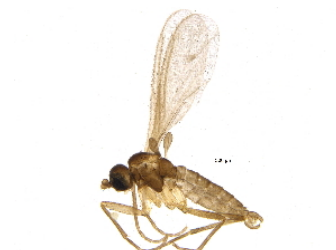

**BIOUG03647-D10 [Lateral]**  
Sciaridae  
Family: Sciaridae  
BIN URI: BOLD:AAU6616

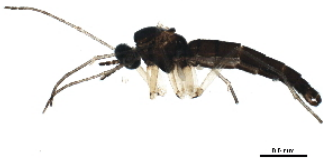

**BIOUG21893-G10 [Lateral]**  
Sciaridae  
Family: Sciaridae  
BIN URI: BOLD:ACC9223

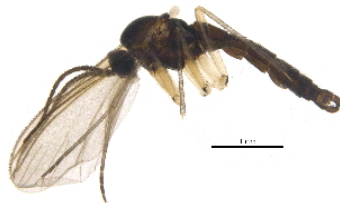

**BIOUG22573-E07 [Lateral]**  
Sciaridae  
Family: Sciaridae  
BIN URI: BOLD:AAP6466

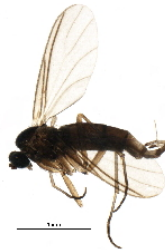

**BIOUG22362-F01 [Lateral]**  
Sciaridae  
Family: Sciaridae  
BIN URI: BOLD:ACV4825

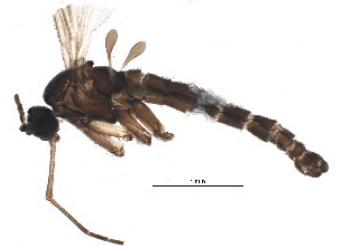

**BIOUG22418-F09 [Lateral]**  
Sciaridae  
Family: Sciaridae  
BIN URI: BOLD:ACJ7008

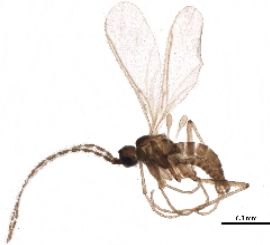

**BIOUG08481-F11 [Lateral]**  
Sciaridae  
Family: Sciaridae  
BIN URI: BOLD:ACV8240

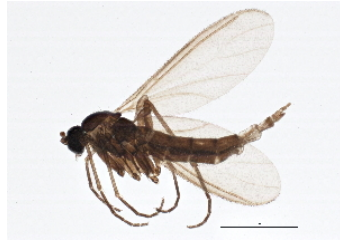

**BIOUG03062-D12 [Lateral]**  
Sciaridae  
Family: Sciaridae  
BIN URI: BOLD:ACC8493

**IMAGE NOT AVAILABLE**

**BIOUG22729-G08**  
Sciaridae  
Family: Sciaridae

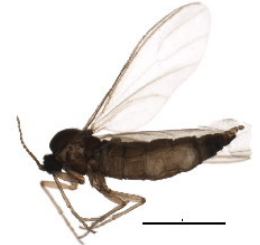

**BIOUG01337-G08 [Lateral]**  
Sciaridae  
Family: Sciaridae  
BIN URI: BOLD:AAN6770

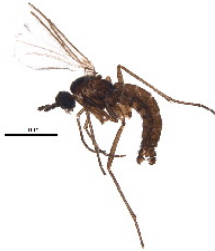

**BIOUG20569-D12 [Lateral]**  
Sciaridae  
Family: Sciaridae  
BIN URI: BOLD:ACG7300

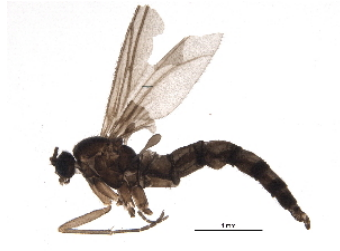

**BIOUG10693-C08 [Lateral]**  
Sciaridae  
Family: Sciaridae  
BIN URI: BOLD:ACL3186

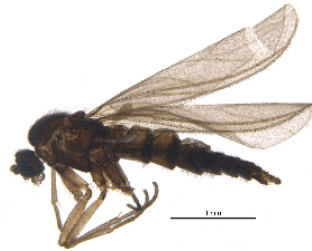

**BIOUG22330-B05 [Lateral]**  
Sciaridae  
Family: Sciaridae  
BIN URI: BOLD:ACB3271

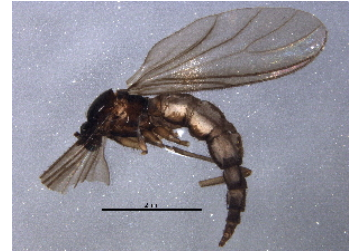

**BIOUG08515-E03 [Lateral]**  
Sciaridae  
Family: Sciaridae  
BIN URI: BOLD:ACK1571

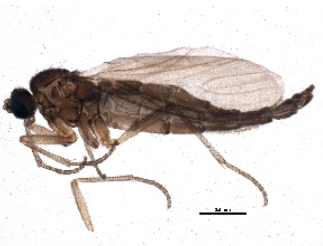

**BIOUG08530-D02 [Lateral]**  
Sciaridae  
Family: Sciaridae  
BIN URI: BOLD:ACK1679

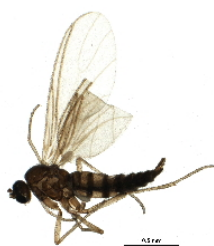

**BIOUG22462-B09 [Lateral]**  
Sciaridae  
Family: Sciaridae  
BIN URI: BOLD:ACA9051

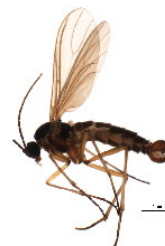

**BIOUG01408-G03 [Lateral]**  
Sciaridae  
Family: Sciaridae  
BIN URI: BOLD:AAH3914

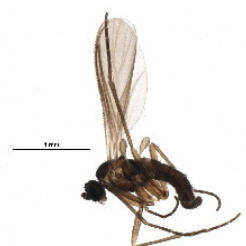

**BIOUG22466-A09 [Lateral]**  
*Cratyna ambigua*  
Family: Sciaridae  
BIN URI: BOLD:AAH3968

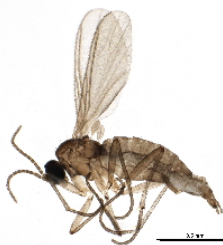

**BIOUG22084-F10 [Lateral]**  
Sciaridae  
Family: Sciaridae  
BIN URI: BOLD:ACA7685

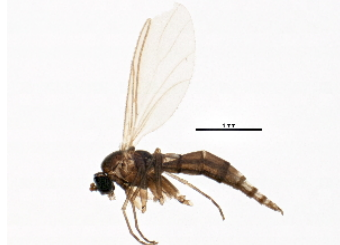

**BIOUG02754-G12 [Lateral]**  
Sciaridae  
Family: Sciaridae  
BIN URI: BOLD:ACB1266

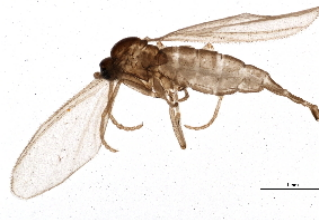

**BIOUG03109-H06 [Lateral]**  
Sciaridae  
Family: Sciaridae  
BIN URI: BOLD:ACC1769

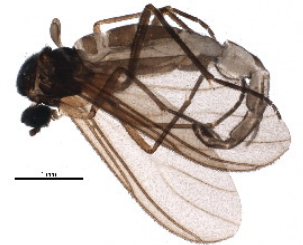

**BIOUG22419-C05 [Lateral]**  
Sciaridae  
Family: Sciaridae  
BIN URI: BOLD:ACK1586

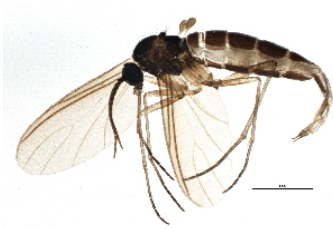

**BIOUG04307-H09 [Lateral]**  
Sciaridae  
Family: Sciaridae  
BIN URI: BOLD:ACC8275

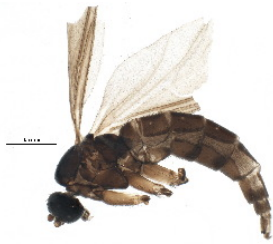

**BIOUG20695-C11 [Lateral]**  
Sciaridae  
Family: Sciaridae  
BIN URI: BOLD:ACU2906

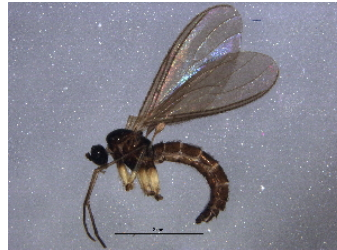

**BIOUG08523-H02 [Lateral]**  
Sciaridae  
Family: Sciaridae  
BIN URI: BOLD:ACL3853

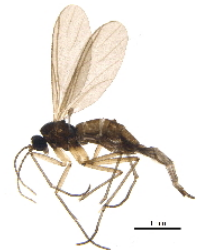

**BIOUG22865-E04 [Lateral]**  
Sciaridae  
Family: Sciaridae  
BIN URI: BOLD:ACL8389

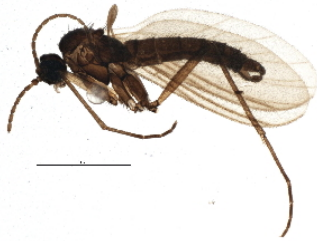

**BIOUG04290-G02 [Lateral]**  
Sciaridae  
Family: Sciaridae  
BIN URI: BOLD:ACD0718

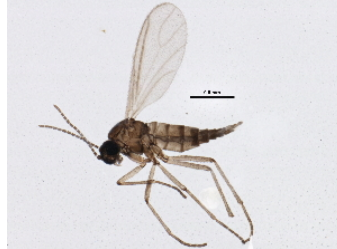

**BIOUG05665-C05 [Lateral]**  
Sciaridae  
Family: Sciaridae  
BIN URI: BOLD:AAU6614

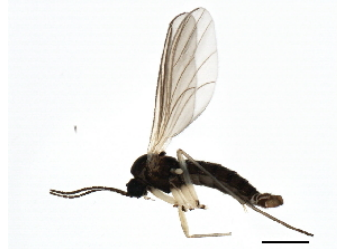

**10PHMAL-1271 [Lateral]**  
Sciaridae  
Family: Sciaridae  
BIN URI: BOLD:AAU6626

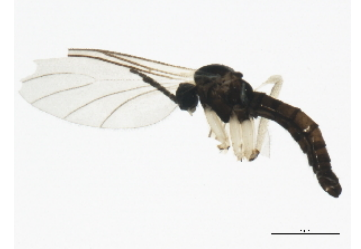

**BIOUG01485-H01 [Lateral]**  
Sciaridae  
Family: Sciaridae  
BIN URI: BOLD:ACG4218

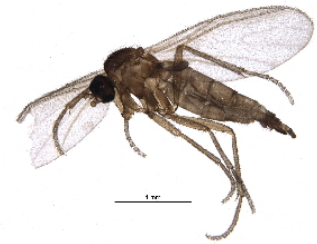

**BIOUG12068-F12 [Lateral]**  
Sciaridae  
Family: Sciaridae  
BIN URI: BOLD:ACM4794

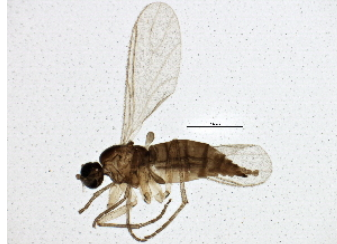

**BIOUG02981-F02 [Lateral]**  
Sciaridae  
Family: Sciaridae  
BIN URI: BOLD:AAP6465

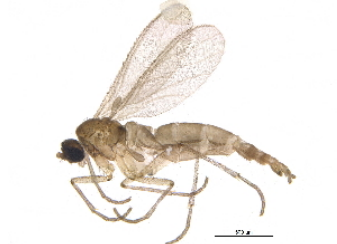

**BIOUG20508-H06 [Lateral]**  
Diptera  
BIN URI: BOLD:ACU3040

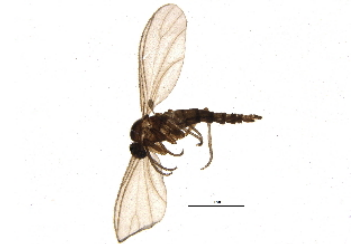

**BIOUG05873-F12 [Lateral]**  
Sciaridae  
Family: Sciaridae  
BIN URI: BOLD:ACG6762

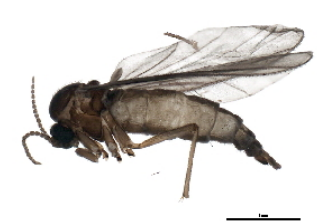

**10PHMAL-1000 [Lateral]**  
Sciaridae  
Family: Sciaridae  
BIN URI: BOLD:AAU6627

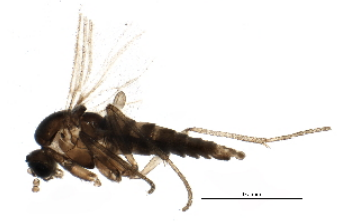

**BIOUG22084-H08 [Lateral]**  
Sciaridae  
Family: Sciaridae  
BIN URI: BOLD:AAQ0299

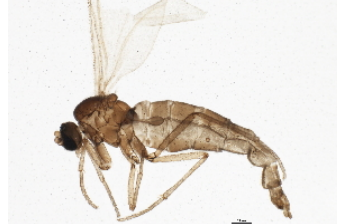

**BIOUG02660-G08 [Lateral]**  
Sciaridae  
Family: Sciaridae  
BIN URI: BOLD:AAZ0294

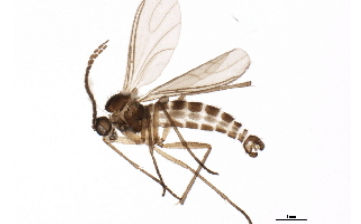

**BIOUG01659-D12 [Lateral]**  
Sciaridae  
Family: Sciaridae  
BIN URI: BOLD:ABA6407

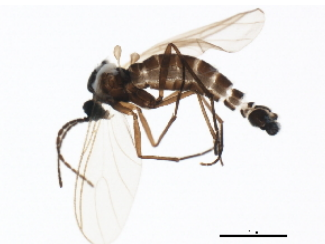

**BIOUG01662-B01 [Lateral]**  
Sciaridae  
Family: Sciaridae  
BIN URI: BOLD:ABA6474

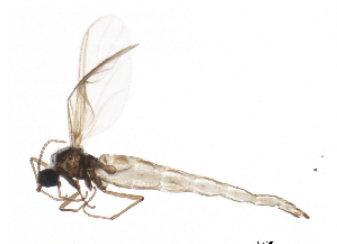

**BIOUG01302-G05 [Lateral]**  
Sciaridae  
Family: Sciaridae  
BIN URI: BOLD:AAZ5612

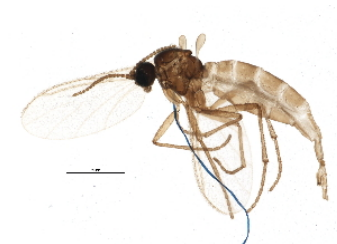

**BIOUG03507-H06 [Lateral]**  
Sciaridae  
Family: Sciaridae  
BIN URI: BOLD:ACC1855

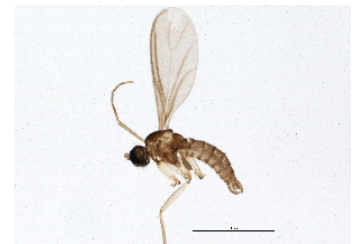

**BIOUG02859-A06 [Lateral]**  
Sciaridae  
Family: Sciaridae  
BIN URI: BOLD:ACA5184

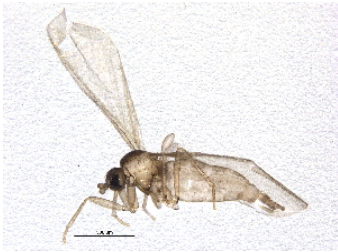

**BIOUG07524-A09 [Lateral]**  
 Sciaridae  
 Family: Sciaridae  
 BIN URI: BOLD:ACI7288

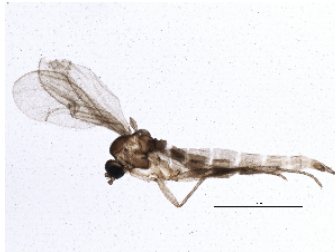

**BIOUG10816-A04 [Lateral]**  
 Sciaridae  
 Family: Sciaridae  
 BIN URI: BOLD:ACM0501

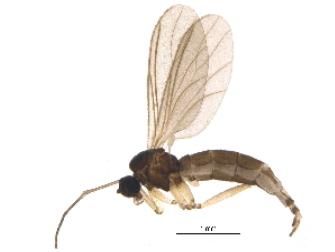

**BIOUG22329-H08 [Lateral]**  
 Sciaridae  
 Family: Sciaridae  
 BIN URI: BOLD:ACV3335

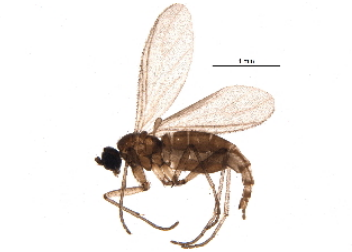

**BIOUG10647-B05 [Lateral]**  
 Sciaridae  
 Family: Sciaridae  
 BIN URI: BOLD:ACC1288

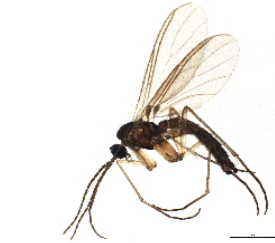

**BIOUG04307-G10 [Lateral]**  
 Leptosciarella scutellata  
 Family: Sciaridae  
 BIN URI: BOLD:ACD1218

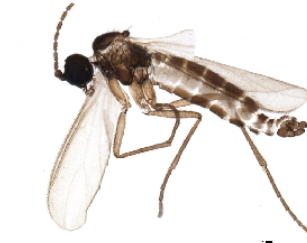

**10PHMAL-1172 [Lateral]**  
 Sciaridae  
 Family: Sciaridae  
 BIN URI: BOLD:AAU6629

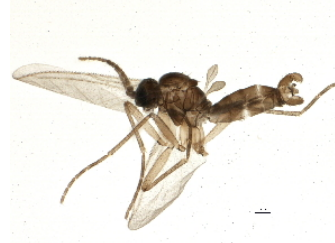

**BIOUG11247-G04 [Lateral]**  
 Sciaridae  
 Family: Sciaridae  
 BIN URI: BOLD:ACK7034

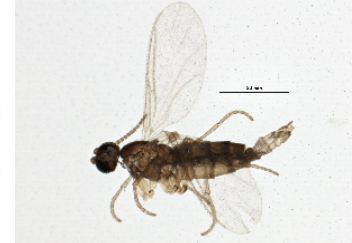

**BIOUG03371-G02 [Lateral]**  
 Sciaridae  
 Family: Sciaridae  
 BIN URI: BOLD:ABY0363

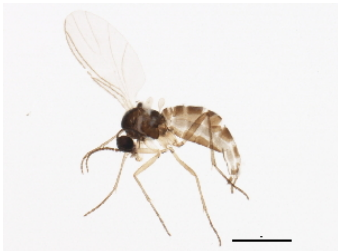

**BIOUG01656-F03 [Lateral]**  
 Sciaridae  
 Family: Sciaridae  
 BIN URI: BOLD:AA6438

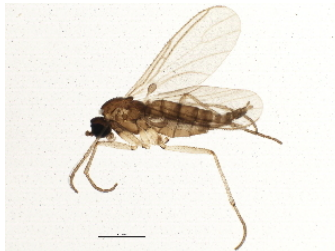

**BIOUG02958-E01 [Lateral]**  
 Sciaridae  
 Family: Sciaridae  
 BIN URI: BOLD:AAM9228

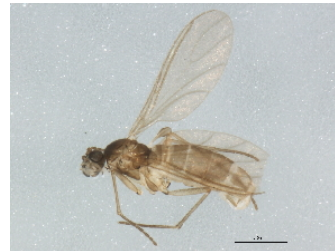

**BIOUG01478-E03 [Lateral]**  
 Sciaridae  
 Family: Sciaridae  
 BIN URI: BOLD:AA6442

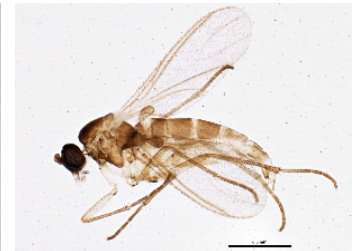

**BIOUG01609-A08 [Lateral]**  
 Sciaridae  
 Family: Sciaridae  
 BIN URI: BOLD:AA6452

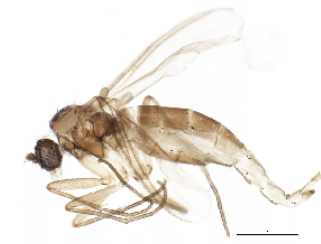

**BIOUG01117-D12 [Lateral]**  
 Sciaridae  
 Family: Sciaridae  
 BIN URI: BOLD:AAU6513

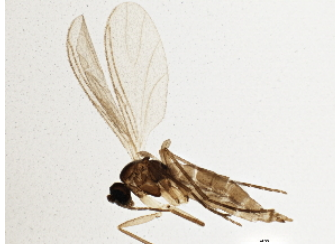

**BIOUG03156-D09 [Lateral]**  
 Sciaridae  
 Family: Sciaridae  
 BIN URI: BOLD:AAP8784

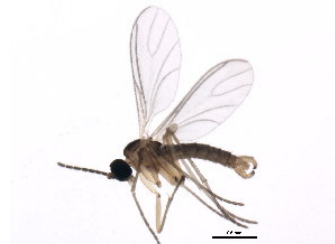

**BIOUG00860-D10 [Lateral]**  
 Sciaridae  
 Family: Sciaridae  
 BIN URI: BOLD:AAV1302

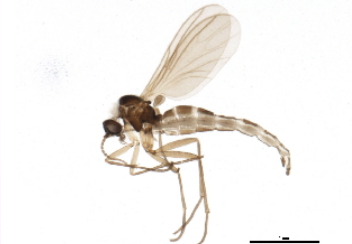

**BIOUG01664-H03 [Lateral]**  
 Sciaridae  
 Family: Sciaridae  
 BIN URI: BOLD:AA6445

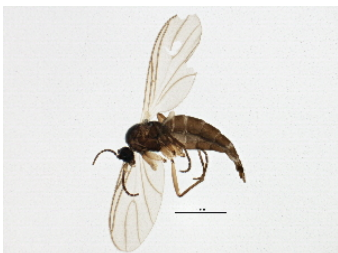

**BIOUG02987-C06 [Lateral]**  
 Lycoriella castanescens  
 Family: Sciaridae  
 BIN URI: BOLD:ABA1215

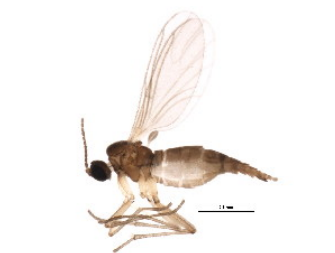

**BIOUG01423-D01 [Lateral]**  
 Sciaridae  
 Family: Sciaridae  
 BIN URI: BOLD:AA6447

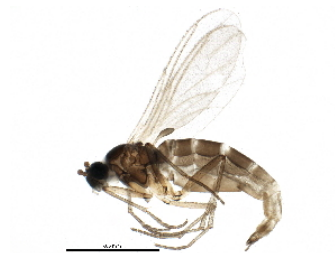

**BIOUG22459-A03 [Lateral]**  
 Sciaridae  
 Family: Sciaridae  
 BIN URI: BOLD:AAU6595

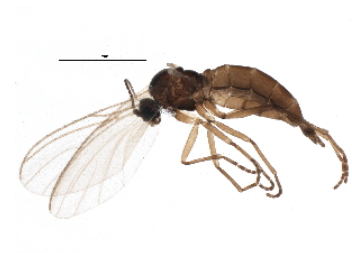

**BIOUG07887-E12 [Lateral]**  
 Scatopsiara atomaria  
 Family: Sciaridae  
 BIN URI: BOLD:AAH3920

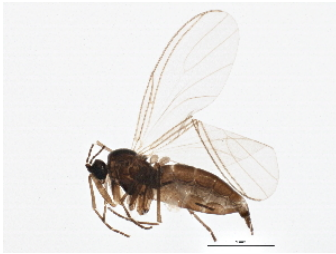

**BIOUG02823-D08 [Lateral]**  
Scatopsiara  
Family: Sciaridae  
BIN URI: BOLD: AAN6431

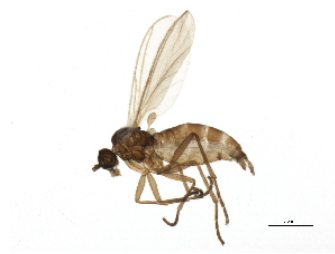

**BIOUG00898-H06 [Lateral]**  
Sciaridae  
Family: Sciaridae  
BIN URI: BOLD: AAH3951

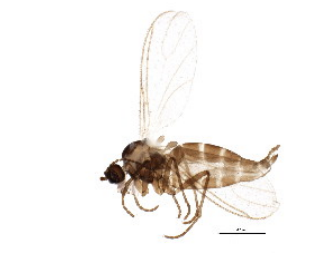

**BIOUG01662-G03 [Lateral]**  
Sciaridae  
Family: Sciaridae  
BIN URI: BOLD: AAQ2559

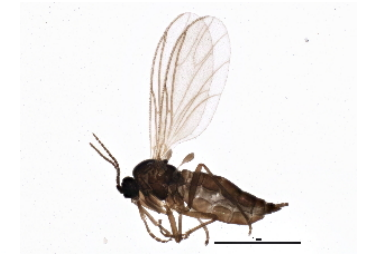

**BIOUG05516-H07 [Lateral]**  
Sciaridae  
Family: Sciaridae  
BIN URI: BOLD: ABV1265

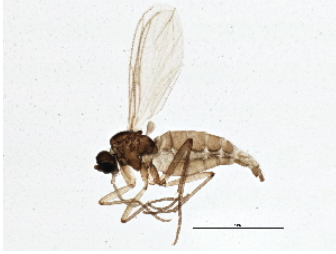

**BIOUG04309-C09 [Lateral]**  
Sciaridae  
Family: Sciaridae  
BIN URI: BOLD: ACD0200

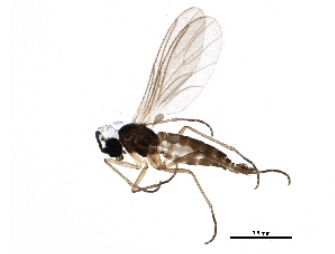

**BIOUG22366-G05 [Lateral]**  
Sciaridae  
Family: Sciaridae  
BIN URI: BOLD: ACG8695

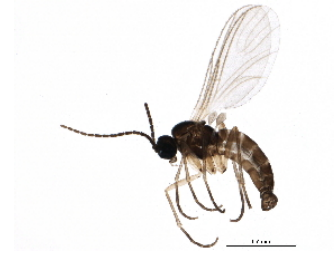

**BIOUG22366-F09 [Lateral]**  
Lycoriella  
Family: Sciaridae  
BIN URI: BOLD: ACG9235

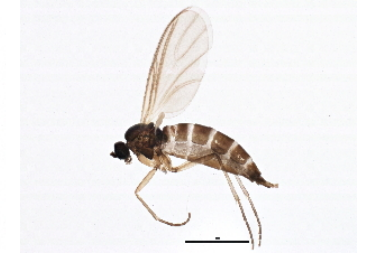

**BIOUG05514-D03 [Lateral]**  
Sciaridae  
Family: Sciaridae  
BIN URI: BOLD: ABA6415

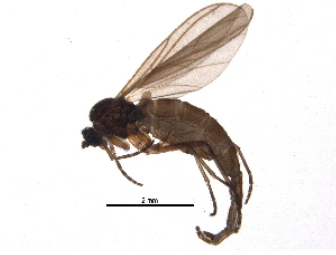

**BIOUG10606-E06 [Lateral]**  
Sciaridae  
Family: Sciaridae  
BIN URI: BOLD: ACL6671

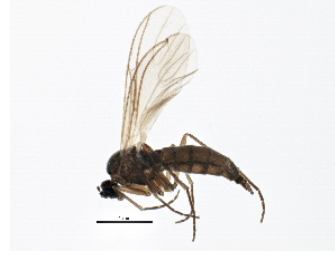

**BIOUG05508-B05 [Lateral]**  
Sciaridae  
Family: Sciaridae  
BIN URI: BOLD: ACR7948

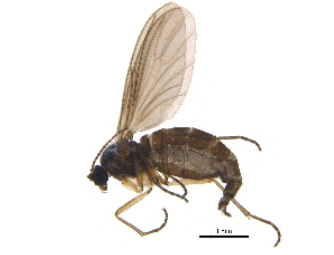

**BIOUG22323-G03 [Lateral]**  
Sciaridae  
Family: Sciaridae  
BIN URI: BOLD: ACV4024

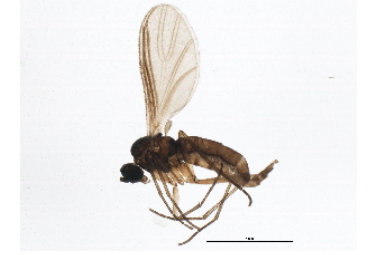

**BIOUG02750-H07 [Lateral]**  
Sciaridae  
Family: Sciaridae  
BIN URI: BOLD: ACA5246

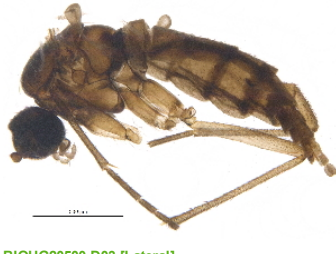

**BIOUG20500-D03 [Lateral]**  
Diptera  
BIN URI: BOLD: ACU3044

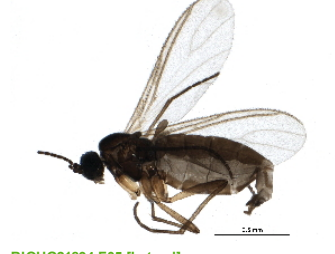

**BIOUG21894-F05 [Lateral]**  
Sciaridae  
Family: Sciaridae  
BIN URI: BOLD: ACV5075

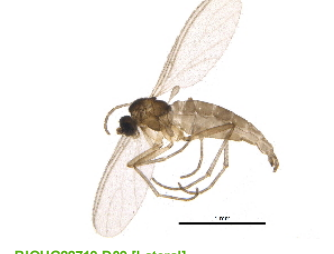

**BIOUG22719-D09 [Lateral]**  
Sciaridae  
Family: Sciaridae  
BIN URI: BOLD: ACV4812

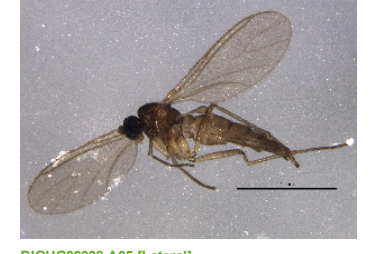

**BIOUG09938-A05 [Lateral]**  
Sciaridae  
Family: Sciaridae  
BIN URI: BOLD: ACL3441

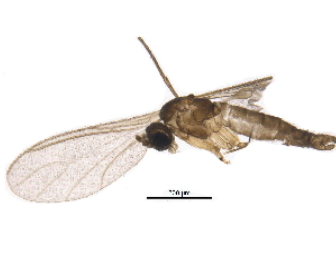

**BIOUG21333-E03 [Lateral]**  
Diptera  
BIN URI: BOLD: AAN6440

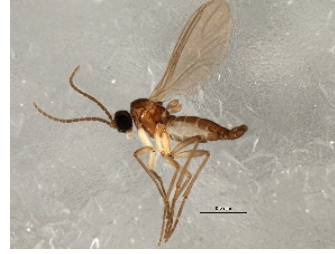

**08TTML-1623 [Lateral]**  
Sciaridae  
Family: Sciaridae  
BIN URI: BOLD: AAN6433

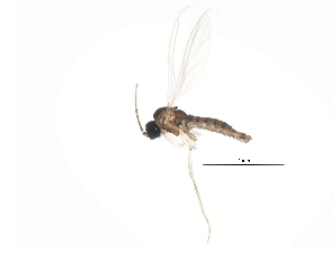

**10JSROW-1092 [Lateral]**  
Sciaridae  
Family: Sciaridae  
BIN URI: BOLD: AAP1834

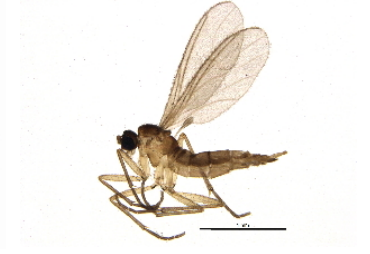

**BIOUG05873-F11 [Lateral]**  
Sciaridae  
Family: Sciaridae  
BIN URI: BOLD: ACE0982

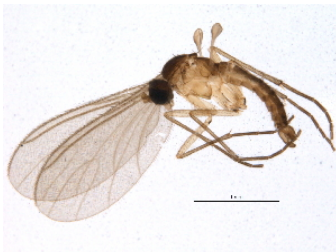

**BIOUG04666-F06 [Lateral]**  
Sciaridae  
Family: Sciaridae  
BIN URI: BOLD:ACE1034

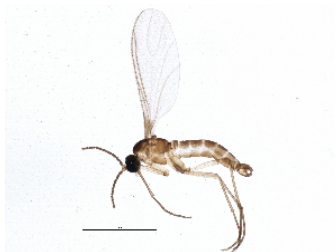

**BIOUG06518-C06 [Lateral]**  
Sciaridae  
Family: Sciaridae  
BIN URI: BOLD:ABY2036

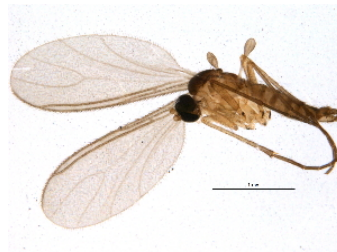

**BIOUG04666-F03 [Lateral]**  
Sciaridae  
Family: Sciaridae  
BIN URI: BOLD:ACE0960

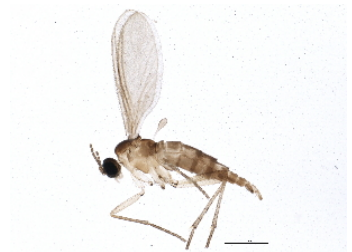

**BIOUG10815-F10 [Lateral]**  
Sciaridae  
Family: Sciaridae  
BIN URI: BOLD:ACE0959

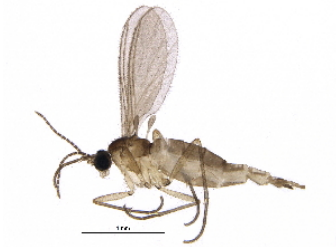

**BIOUG09937-G12 [Lateral]**  
Sciaridae  
Family: Sciaridae  
BIN URI: BOLD:ACL3134

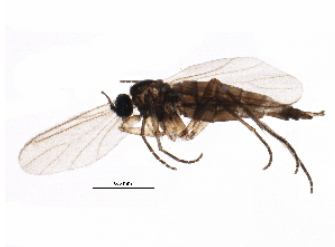

**BIOUG22861-D10 [Lateral]**  
Sciaridae  
Family: Sciaridae  
BIN URI: BOLD:ACV5524

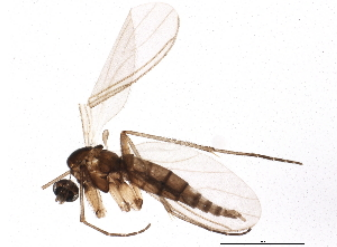

**BIOUG04090-E04 [Lateral]**  
Sciaridae  
Family: Sciaridae  
BIN URI: BOLD:ACA4924

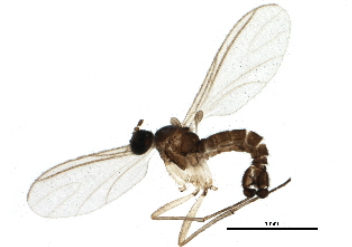

**BIOUG08738-E08 [Lateral]**  
Sciaridae  
Family: Sciaridae  
BIN URI: BOLD:ACK2160

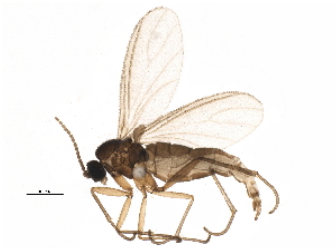

**BIOUG08875-D03 [Lateral]**  
Sciaridae  
Family: Sciaridae  
BIN URI: BOLD:ACK7315

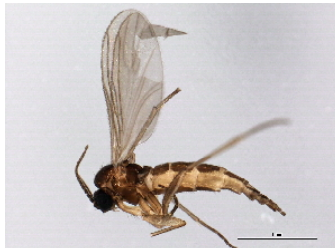

**08TTML-2263 [Lateral]**  
Sciaridae  
Family: Sciaridae  
BIN URI: BOLD:AAN6446

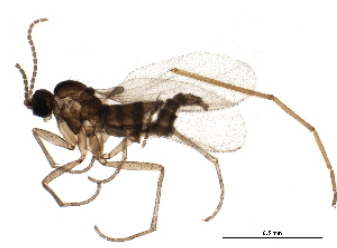

**BIOUG22299-E03 [Lateral]**  
Sciaridae  
Family: Sciaridae  
BIN URI: BOLD:ACA3384

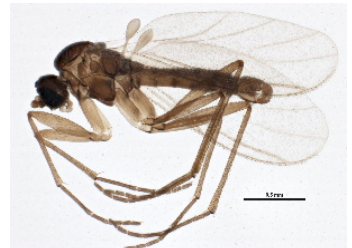

**BIOUG02753-A10 [Lateral]**  
Sciaridae  
Family: Sciaridae  
BIN URI: BOLD:ACA4900

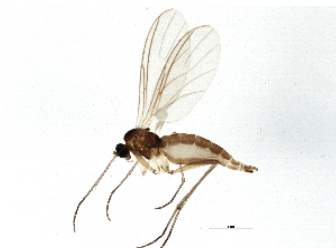

**BIOUG04309-G08 [Lateral]**  
Sciaridae  
Family: Sciaridae  
BIN URI: BOLD:AAP1210

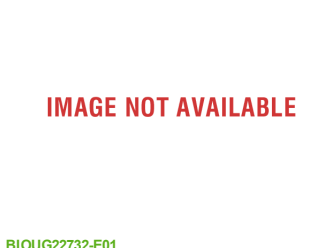

**BIOUG22732-E01**  
Sciaridae  
Family: Sciaridae

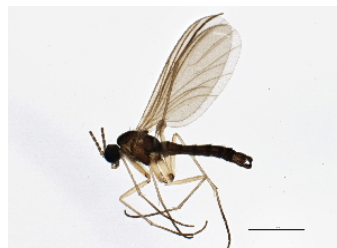

**BIOUG05826-H08 [Lateral]**  
Sciaridae  
Family: Sciaridae  
BIN URI: BOLD:ACB8873

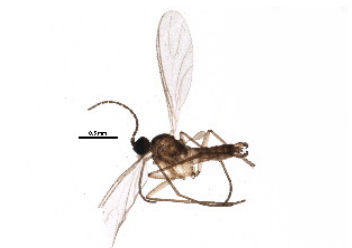

**BIOUG21207-G04 [Lateral]**  
Diptera  
BIN URI: BOLD:ACU7230

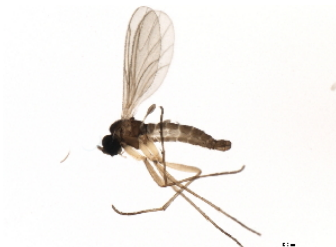

**10JSROW-1722 [Lateral]**  
Sciaridae  
Family: Sciaridae  
BIN URI: BOLD:AAM9242

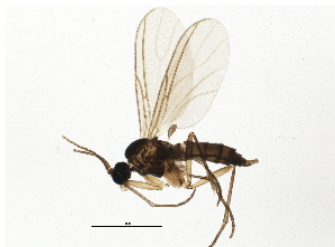

**BIOUG02936-E01 [Lateral]**  
Bradyzia difformis  
Family: Sciaridae  
BIN URI: BOLD:AAV1295

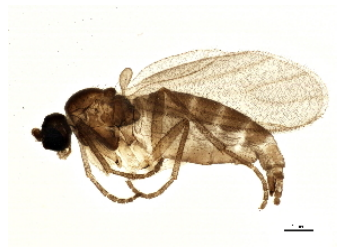

**BIOUG03248-H04 [Lateral]**  
Sciaridae  
Family: Sciaridae  
BIN URI: BOLD:ABV1277

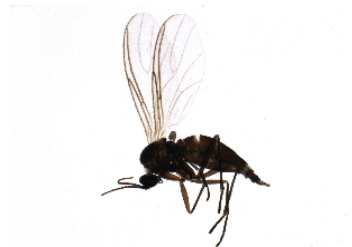

**BIOUG22084-C04 [Lateral]**  
Bradyzia vagans  
Family: Sciaridae  
BIN URI: BOLD:AAM9252

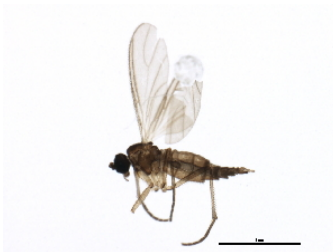

**10PHMAL-3054 [Lateral]**  
Sciaridae  
Family: Sciaridae  
BIN URI: BOLD:AAN6435

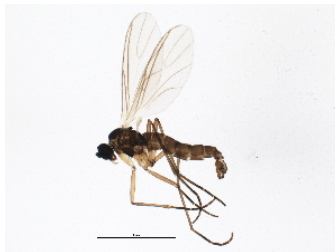

**BIOUG05505-H10 [Lateral]**  
Sciaridae  
Family: Sciaridae  
BIN URI: BOLD:ABA1231

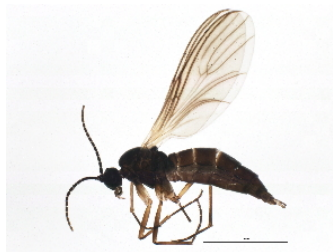

**BIOUG05591-F05 [Lateral]**  
Sciaridae  
Family: Sciaridae  
BIN URI: BOLD:ABW1417

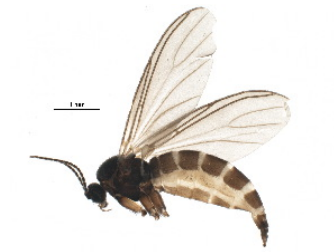

**BIOUG22359-H06 [Lateral]**  
Bradyzia pallipes  
Family: Sciaridae  
BIN URI: BOLD:AAM9254

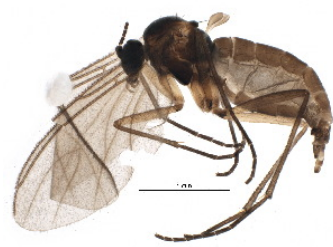

**BIOUG22419-A01 [Lateral]**  
Sciaridae  
Family: Sciaridae  
BIN URI: BOLD:AAH4013

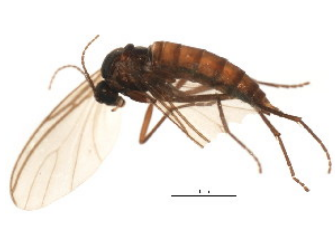

**BIOUG01914-H10 [Lateral]**  
Sciaridae  
Family: Sciaridae  
BIN URI: BOLD:AAH3910

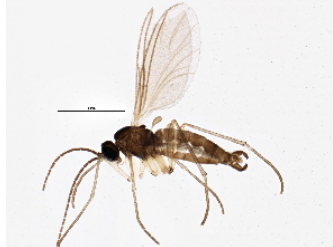

**BIOUG02631-E03 [Lateral]**  
Sciaridae  
Family: Sciaridae  
BIN URI: BOLD:AAN6429

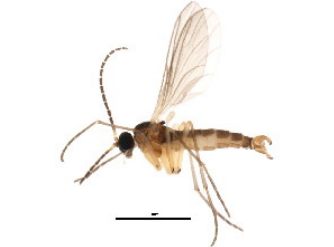

**BIOUG01553-A02 [Lateral]**  
Sciaridae  
Family: Sciaridae  
BIN URI: BOLD:ABA0929

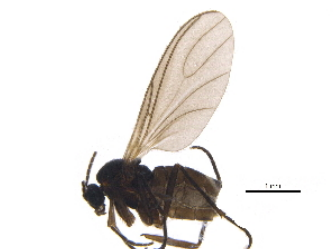

**BIOUG22323-C01 [Lateral]**  
Sciaridae  
Family: Sciaridae  
BIN URI: BOLD:ACV2795

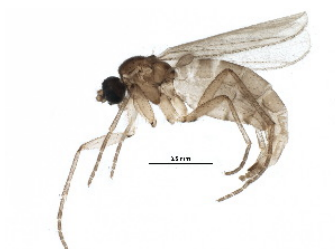

**BIOUG22291-H08 [Lateral]**  
Lycoriella stylata  
Family: Sciaridae  
BIN URI: BOLD:AAN6430

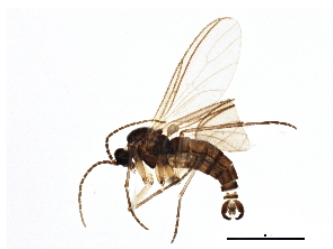

**BIOUG03288-C09 [Lateral]**  
Sciaridae  
Family: Sciaridae  
BIN URI: BOLD:ACA9720

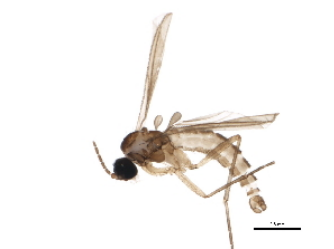

**BIOUG01299-A05 [Lateral]**  
Sciaridae  
Family: Sciaridae  
BIN URI: BOLD:AAU6537

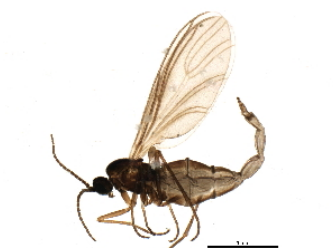

**BIOUG08689-C07 [Lateral]**  
Sciaridae  
Family: Sciaridae  
BIN URI: BOLD:ACM2497

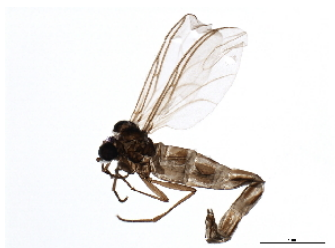

**10PHMAL-1457 [Lateral]**  
Sciaridae  
Family: Sciaridae  
BIN URI: BOLD:AAU6615

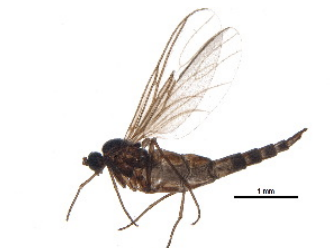

**BIOUG22330-H06 [Lateral]**  
Sciaridae  
Family: Sciaridae  
BIN URI: BOLD:AAU6615

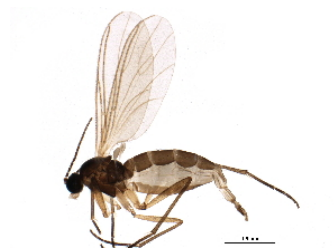

**BIOUG13237-B05 [Lateral]**  
Sciaridae  
Family: Sciaridae  
BIN URI: BOLD:AAH3983

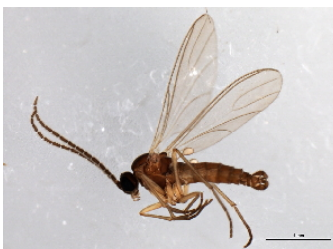

**08TTML-2214 [Lateral]**  
Sciaridae  
Family: Sciaridae  
BIN URI: BOLD:ACR4350

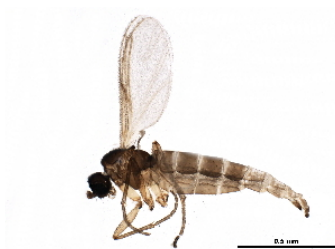

**BIOUG22364-F12 [Lateral]**  
Sciaridae  
Family: Sciaridae  
BIN URI: BOLD:ACV4127

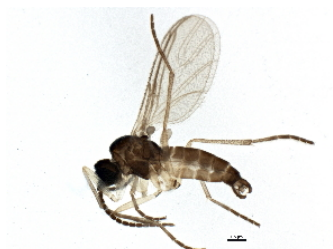

**BIOUG04460-A12 [Lateral]**  
Sciaridae  
Family: Sciaridae  
BIN URI: BOLD:ACD3278

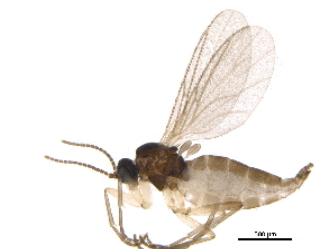

**BIOUG22329-C12 [Lateral]**  
Sciaridae  
Family: Sciaridae  
BIN URI: BOLD:ABV1443



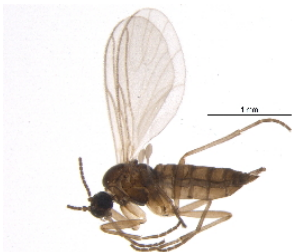

**BIOUG05640-C03 [Lateral]**  
 Sciaridae  
 Family: Sciaridae  
 BIN URI: BOLD:ABV1201

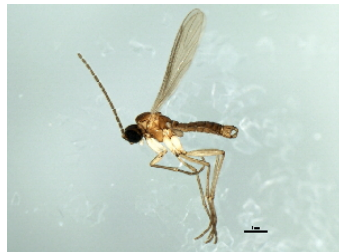

**08TTML-1238 [Lateral]**  
 Sciaridae  
 Family: Sciaridae  
 BIN URI: BOLD:AAN6437

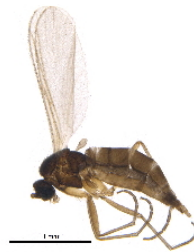

**BIOUG22328-C12 [Lateral]**  
 Sciaridae  
 Family: Sciaridae  
 BIN URI: BOLD:AAV6412

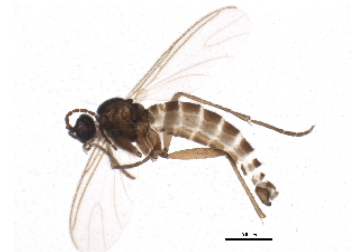

**BIOUG01444-D03 [Lateral]**  
 Sciaridae  
 Family: Sciaridae  
 BIN URI: BOLD:AAZ5626

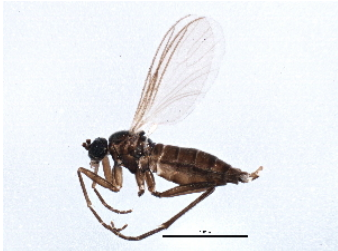

**BIOUG05546-B10 [Lateral]**  
 Sciaridae  
 Family: Sciaridae  
 BIN URI: BOLD:AAV1261

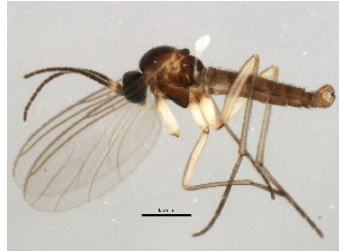

**BIOUG01543-H04 [Lateral]**  
 Sciaridae  
 Family: Sciaridae  
 BIN URI: BOLD:AAN6444

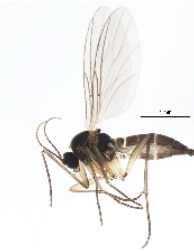

**10JSROW-1558 [Lateral]**  
 Sciaridae  
 Family: Sciaridae  
 BIN URI: BOLD:AAV1366

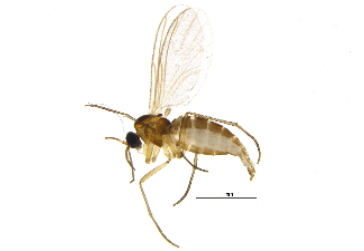

**BIOUG02308-B08 [Lateral]**  
 Sciaridae  
 Family: Sciaridae  
 BIN URI: BOLD:AAH3947

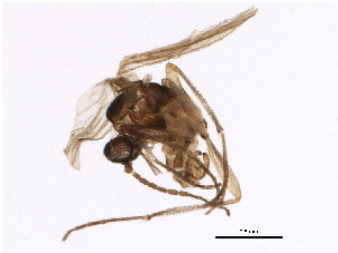

**BIOUG01752-G07 [Lateral]**  
 Sciaridae  
 Family: Sciaridae  
 BIN URI: BOLD:ACE7580

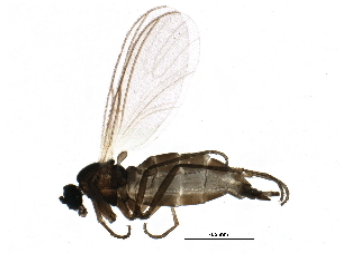

**BIOUG22365-F03 [Lateral]**  
 Bradysia  
 Family: Sciaridae  
 BIN URI: BOLD:AAM9243

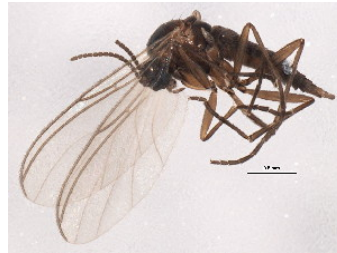

**BIOUG01460-A04 [Lateral]**  
 Sciaridae  
 Family: Sciaridae  
 BIN URI: BOLD:ABA6471

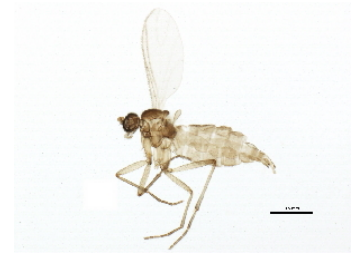

**BIOUG01449-G10 [Lateral]**  
 Sciaridae  
 Family: Sciaridae  
 BIN URI: BOLD:AAU6542

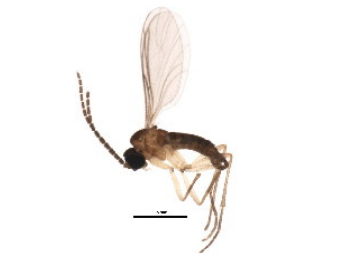

**BIOUG01423-C11 [Lateral]**  
 Sciaridae  
 Family: Sciaridae  
 BIN URI: BOLD:ABU5521

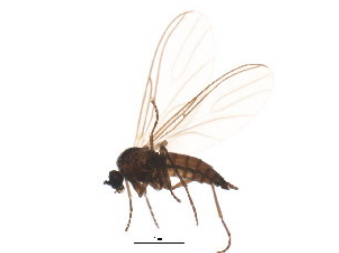

**08WOLVES-01300 [Lateral]**  
 Sciaridae  
 Family: Sciaridae  
 BIN URI: BOLD:AAU6764

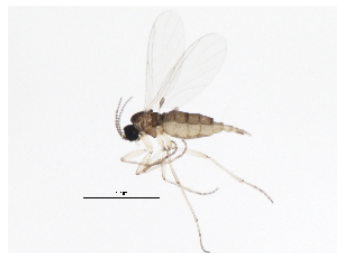

**10JSROW-1590 [Lateral]**  
 Sciaridae  
 Family: Sciaridae  
 BIN URI: BOLD:AAU6622

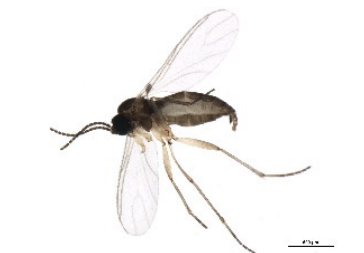

**BIOUG01348-E06 [Lateral]**  
 Sciaridae  
 Family: Sciaridae  
 BIN URI: BOLD:ACE3123

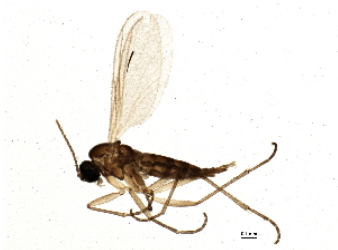

**BIOUG02965-F06 [Lateral]**  
 Sciaridae  
 Family: Sciaridae  
 BIN URI: BOLD:ABU5520

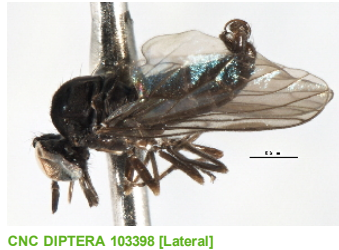

**CNC DIPTERA 103398 [Lateral]**  
 Iteaphila nitidula  
 Family: Empididae  
 BIN URI: BOLD:AAF9884

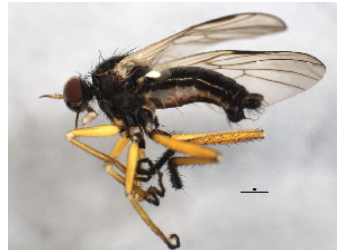

**10JSROW-1205 [Lateral]**  
 Rhizophomyia  
 Family: Empididae  
 BIN URI: BOLD:AAP6354

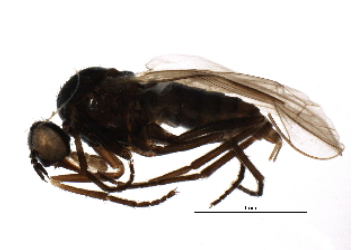

**BIOUG10645-D05 [Lateral]**  
 Rhizophomyia  
 Family: Empididae  
 BIN URI: BOLD:ACV2134

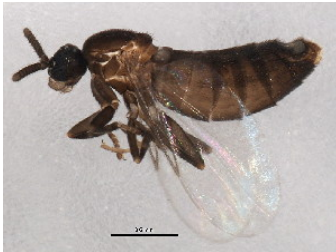

**BIOUG01423-E05 [Lateral]**  
 Scatopsidae  
 Family: Scatopsidae  
 BIN URI: BOLD: AAN8523

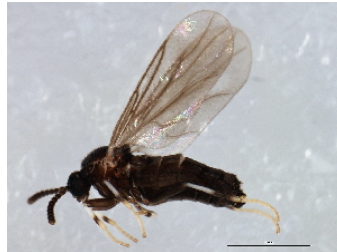

**08TTML-1162 [Lateral]**  
 Scatopsidae  
 Family: Scatopsidae  
 BIN URI: BOLD: AAH4123

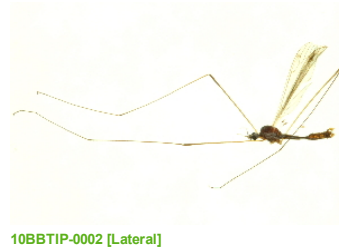

**10BBTIP-0002 [Lateral]**  
 Limoniidae  
 Family: Limoniidae  
 BIN URI: BOLD: AAO3939

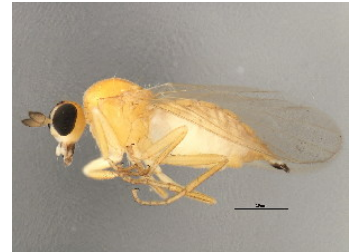

**10JSROW-0857 [Lateral]**  
 Allanthalia sp.  
 Family: Hybotidae  
 BIN URI: BOLD: AAL8961

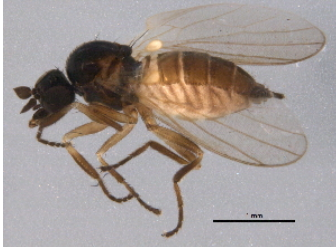

**BIOUG07522-G06 [Lateral]**  
 Anthalia sp. 5  
 Family: Hybotidae  
 BIN URI: BOLD: ACA7284

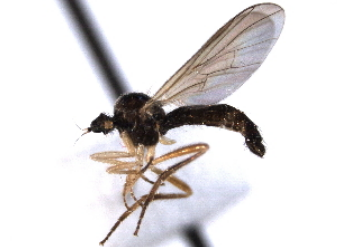

**JSS21187 [Lateral]**  
 Leptopeza compta  
 Family: Hybotidae  
 BIN URI: BOLD: AAF9779

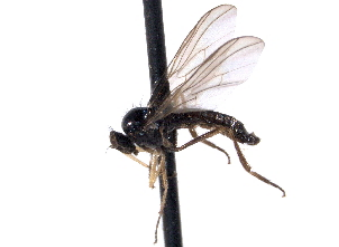

**CNC DIPTERA 161673 [Lateral]**  
 Leptopeza disparilla  
 Family: Hybotidae  
 BIN URI: BOLD: AAF9791

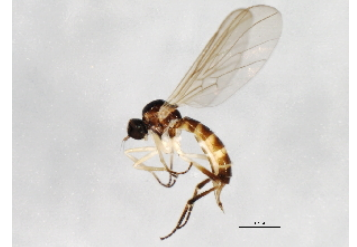

**09BBEDI-0872 [Lateral]**  
 Leptopeza flavipes  
 Family: Hybotidae  
 BIN URI: BOLD: ACE5974

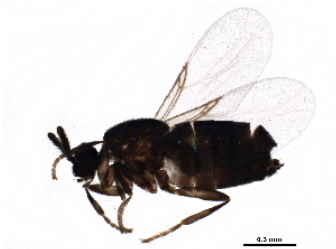

**BIOUG22364-G04 [Lateral]**  
 Scatopsidae  
 Family: Scatopsidae  
 BIN URI: BOLD: ACV4134

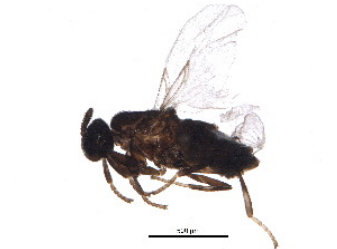

**BIOUG22351-E11 [Lateral]**  
 Scatopsidae  
 Family: Scatopsidae  
 BIN URI: BOLD: AAV1136

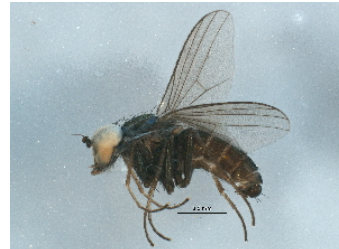

**BIOUG12201-F06 [Lateral]**  
 Dolichopodidae  
 Family: Dolichopodidae  
 BIN URI: BOLD: ACN2360

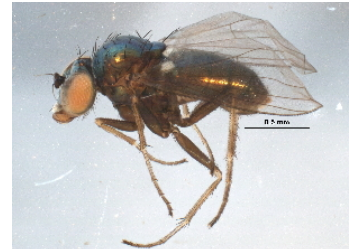

**BIOUG12201-G08 [Lateral]**  
 Dolichopodidae  
 Family: Dolichopodidae  
 BIN URI: BOLD: ACR8420

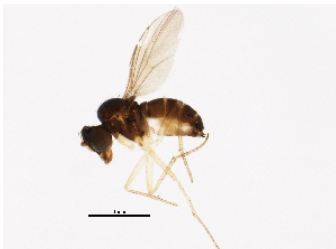

**BIOUG03024-A01 [Lateral]**  
 Dolichopodidae  
 Family: Dolichopodidae  
 BIN URI: BOLD: ACA6204

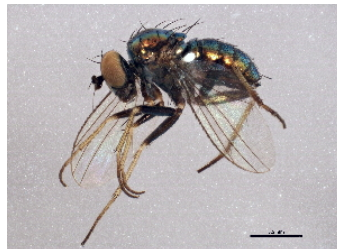

**BIOUG02965-H09 [Lateral]**  
 Chrysotus  
 Family: Dolichopodidae  
 BIN URI: BOLD: AAG9668

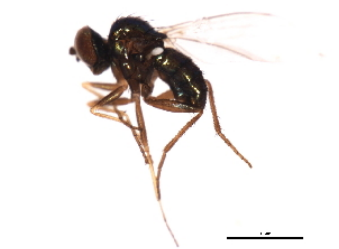

**09BBEDI-2784 [Lateral]**  
 Dolichopodidae  
 Family: Dolichopodidae  
 BIN URI: BOLD: AAN5531

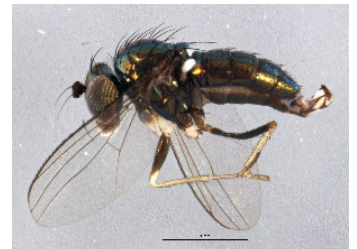

**BIOUG01687-C07 [Lateral]**  
 Chrysotus  
 Family: Dolichopodidae  
 BIN URI: BOLD: AAV3883

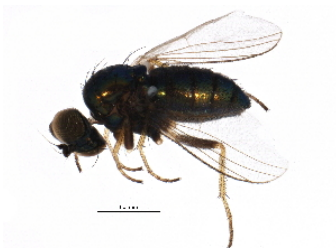

**BIOUG22732-G09 [Lateral]**  
 Chrysotus  
 Family: Dolichopodidae  
 BIN URI: BOLD: ACV5249

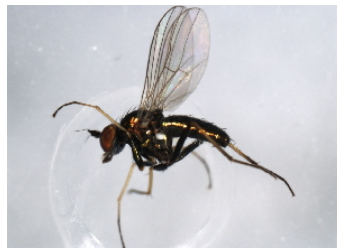

**10BBDIP-1674 [Lateral]**  
 Dolichopodidae  
 Family: Dolichopodidae  
 BIN URI: BOLD: AAG9699

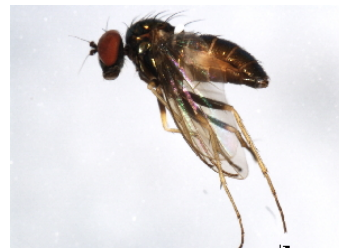

**10BBDIP-2082 [Lateral]**  
 Dolichopodidae  
 Family: Dolichopodidae  
 BIN URI: BOLD: AAP5019

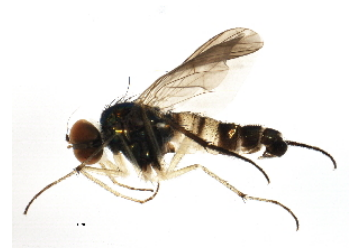

**BIOUG21007-A12 [Lateral]**  
 Diptera  
 BIN URI: BOLD: ACU9078

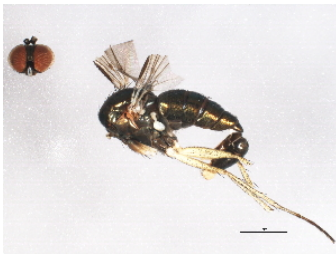

**BIOUG04259-F09 [Lateral]**  
 Gymnopterus celer  
 Family: Dolichopodidae  
 BIN URI: BOLD:ACB3156

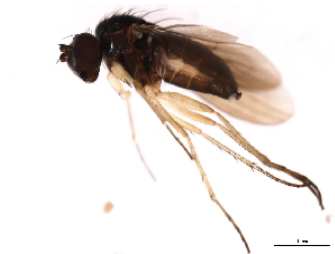

**08TTML-0945 [Lateral]**  
 Dolichopodidae  
 Family: Dolichopodidae  
 BIN URI: BOLD:AAM6783

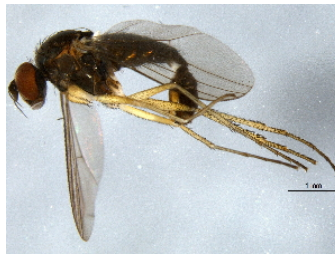

**BIOUG03010-D02 [Lateral]**  
 Dolichopodidae  
 Family: Dolichopodidae  
 BIN URI: BOLD:ACB1149

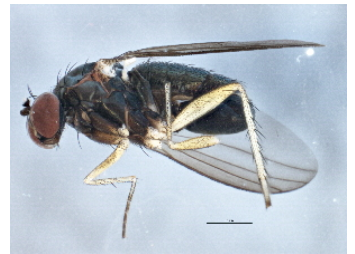

**BIOUG04288-F11 [Lateral]**  
 Dolichopodidae  
 Family: Dolichopodidae  
 BIN URI: BOLD:ACD8765

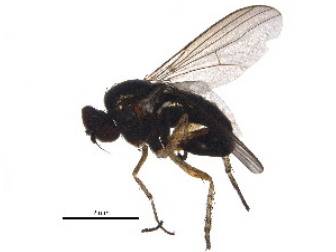

**BIOUG22844-E04 [Lateral]**  
 Gymnopterus  
 Family: Dolichopodidae  
 BIN URI: BOLD:ACW0834

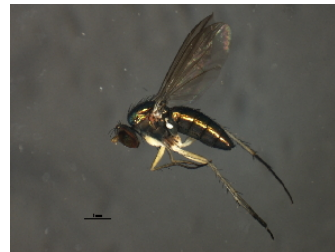

**08BBDIP-2448 [Lateral]**  
 Dolichopus  
 Family: Dolichopodidae  
 BIN URI: BOLD:AAG9652

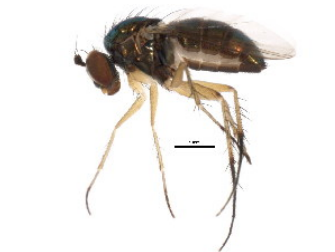

**BIOUG01411-D11 [Lateral]**  
 Dolichopodidae  
 Family: Dolichopodidae  
 BIN URI: BOLD:AAV3887

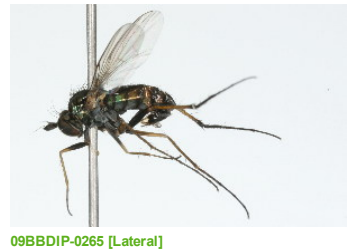

**09BBDIP-0265 [Lateral]**  
 Dolichopodidae  
 Family: Dolichopodidae  
 BIN URI: BOLD:AAG9691

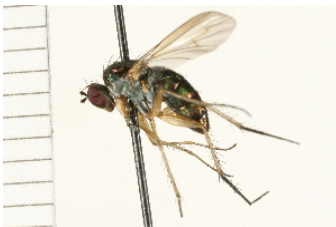

**08MZPP-106 [Lateral]**  
 Dolichopodidae  
 Family: Dolichopodidae  
 BIN URI: BOLD:AAG9641

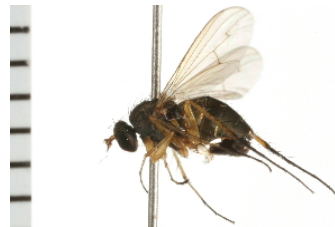

**08BBDIP-0006 [Lateral]**  
 Dolichopodidae  
 Family: Dolichopodidae  
 BIN URI: BOLD:AAG9626

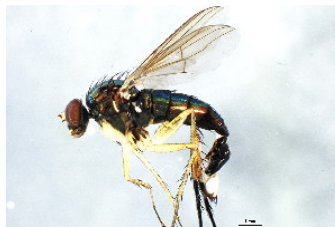

**08TTML-2538 [Lateral]**  
 Dolichopodidae  
 Family: Dolichopodidae  
 BIN URI: BOLD:AAG9629

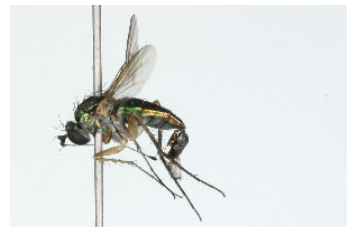

**09BBDIP-0264 [Lateral]**  
 Dolichopus  
 Family: Dolichopodidae  
 BIN URI: BOLD:AAG9690

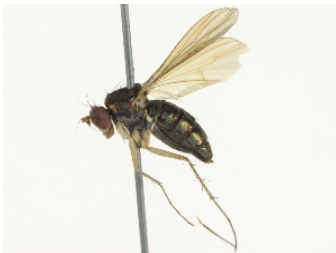

**BIOUG03681-E05 [Lateral]**  
 Dolichopodidae  
 Family: Dolichopodidae  
 BIN URI: BOLD:ABA4798

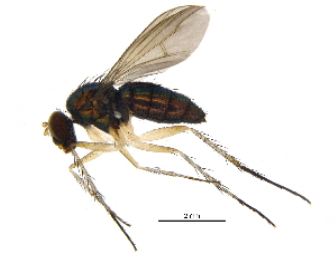

**BIOUG21529-B08 [Lateral]**  
 Diptera  
 BIN URI: BOLD:ACU7943

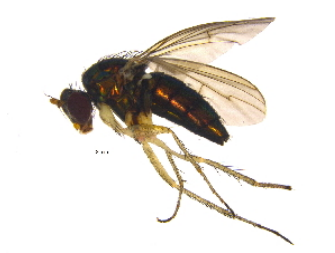

**BIOUG01604-E04 [Lateral]**  
 Dolichopodidae  
 Family: Dolichopodidae  
 BIN URI: BOLD:AAG9657

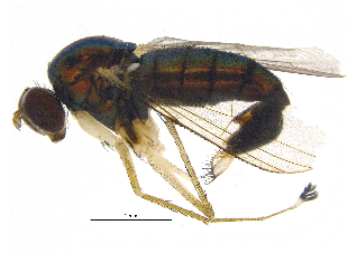

**BIOUG16076-G10 [Lateral]**  
 Dolichopodidae  
 Family: Dolichopodidae  
 BIN URI: BOLD:ACU5946

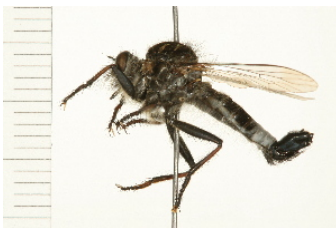

**DIPT 0041.02 [Lateral]**  
 Asilidae  
 Family: Asilidae  
 BIN URI: BOLD:AAH2306

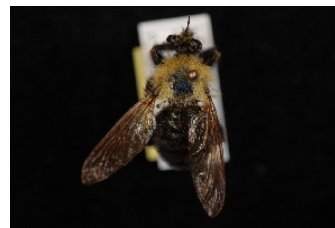

**10-SKAS-088 [Dorsal]**  
 Laphria thoracica  
 Family: Asilidae  
 BIN URI: BOLD:AAW9901

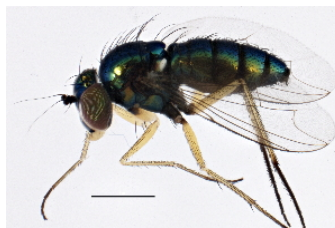

**BIOUG03138-F07 [Lateral]**  
 Dolichopodidae  
 Family: Dolichopodidae  
 BIN URI: BOLD:AAD2041

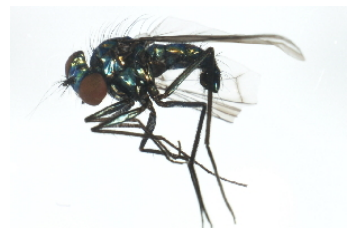

**08BBDIP-0787 [Lateral]**  
 Dolichopodidae  
 Family: Dolichopodidae  
 BIN URI: BOLD:AAG9640

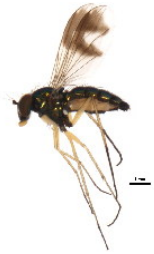

**BIOUG01408-A08 [Lateral]**  
 Dolichopodidae  
 Family: Dolichopodidae  
 BIN URI: BOLD:AAG9693

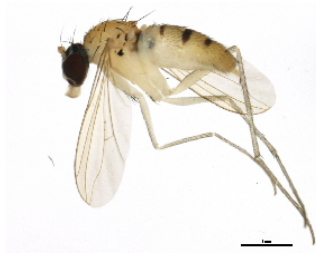

**BIOUG01121-E02 [Lateral]**  
 Dolichopodidae  
 Family: Dolichopodidae  
 BIN URI: BOLD:AAQ0271

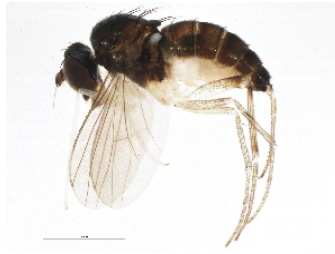

**BIOUG03829-D02 [Lateral]**  
 Dolichopodidae  
 Family: Dolichopodidae  
 BIN URI: BOLD:ACC8120

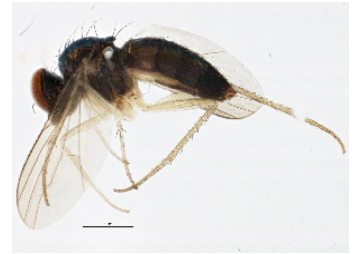

**BIOUG03261-H04 [Lateral]**  
 Dolichopodidae  
 Family: Dolichopodidae  
 BIN URI: BOLD:AAG9744

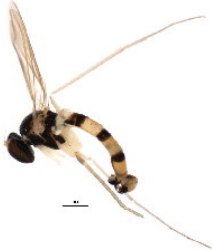

**BIOUG01459-D10 [Lateral]**  
 Dolichopodidae  
 Family: Dolichopodidae  
 BIN URI: BOLD:ABW1193

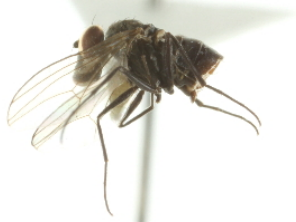

**CNC DIPTERA 105362 [Lateral]**  
 Medetera signaticornis  
 Family: Dolichopodidae  
 BIN URI: BOLD:AAZ3931

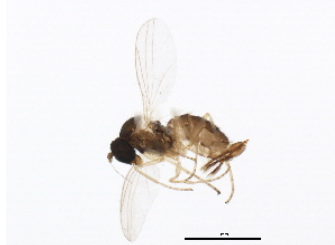

**BIOUG01445-B09 [Lateral]**  
 Dolichopodidae  
 Family: Dolichopodidae  
 BIN URI: BOLD:AAN5528

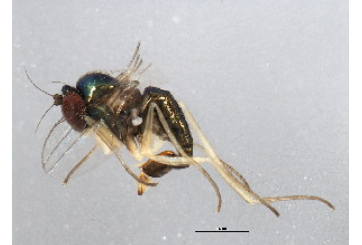

**10JSROW-0841 [Lateral]**  
 Dolichopodidae  
 Family: Dolichopodidae  
 BIN URI: BOLD:AAU6620

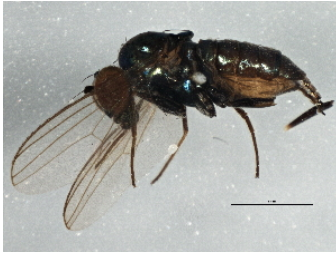

**BIOUG03154-D02 [Lateral]**  
 Dolichopodidae  
 Family: Dolichopodidae  
 BIN URI: BOLD:AAZ6708

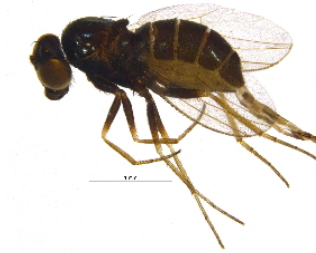

**BIOUG02843-G02 [Lateral]**  
 Dolichopodidae  
 Family: Dolichopodidae  
 BIN URI: BOLD:ACG9324

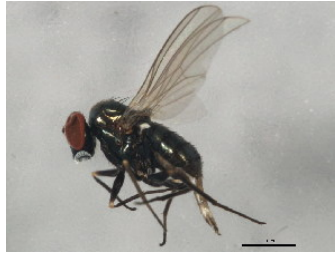

**10JSROW-1038 [Lateral]**  
 Dolichopodidae  
 Family: Dolichopodidae  
 BIN URI: BOLD:AAP6322

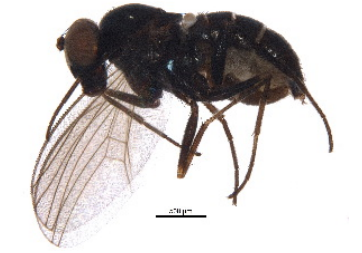

**BIOUG22356-C09 [Lateral]**  
 Dolichopodidae  
 Family: Dolichopodidae  
 BIN URI: BOLD:AAQ0833

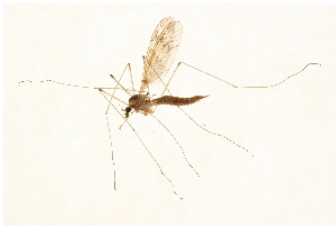

**09BBTEC-058 [Lateral]**  
 Tipula (Beringotipula) coloradensis  
 Family: Tipulidae  
 BIN URI: BOLD:AAF9052

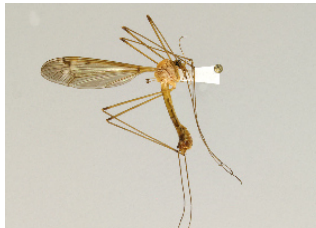

**CMNH475159 [Lateral]**  
 Tipula mallochi  
 Family: Tipulidae  
 BIN URI: BOLD:AAE0035

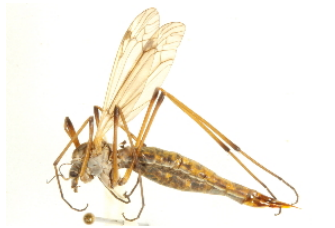

**CNC DIPTERA 192300 [Lateral]**  
 Tipula dorsimacula  
 Family: Tipulidae  
 BIN URI: BOLD:AAF8990

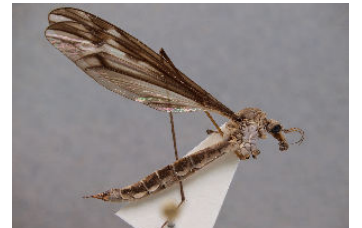

**JES-20120069 [Lateral]**  
 Tipula furca  
 Family: Tipulidae  
 BIN URI: BOLD:ABX5321

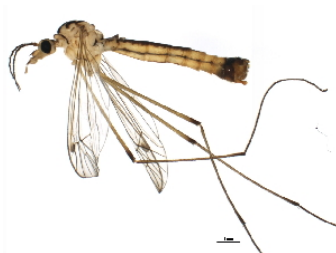

**BIOUG01121-C01 [Lateral]**  
 Nephrotoma cornicina  
 Family: Tipulidae  
 BIN URI: BOLD:AAZ0266

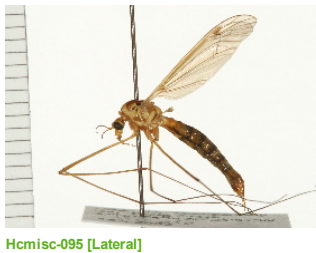

**Hcmisc-095 [Lateral]**  
 Tipulidae  
 Family: Tipulidae  
 BIN URI: BOLD:ABX6186

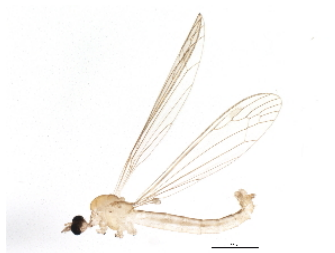

**BIOUG02976-A01 [Lateral]**  
 Dicranomyia  
 Family: Limoniidae  
 BIN URI: BOLD:ABW4424

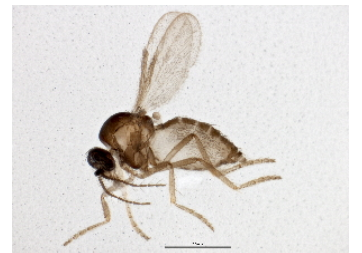

**BIOUG03636-F12 [Lateral]**  
 Forcipomyia  
 Family: Ceratopogonidae  
 BIN URI: BOLD:AAN5147

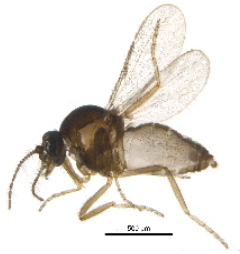

**BIOUG22719-E03 [Lateral]**  
 Forcipomyia  
 Family: Ceratopogonidae  
 BIN URI: BOLD:ACC7974

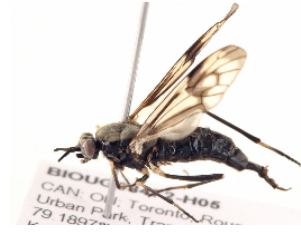

**BIOUG08472-H05 [Lateral]**  
 Xylophagus  
 Family: Xylophagidae  
 BIN URI: BOLD:AAJ9649

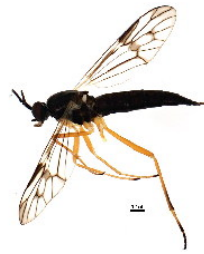

**BIOUG00992-F04 [Lateral]**  
 Xylophagus  
 Family: Xylophagidae  
 BIN URI: BOLD:AAM7333

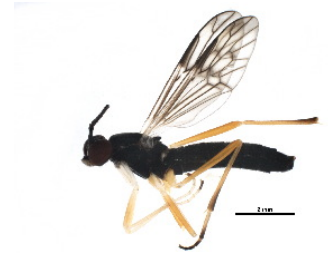

**BIOUG21873-D01 [Lateral]**  
 Xylophagus reflectens  
 Family: Xylophagidae  
 BIN URI: BOLD:AAP7637

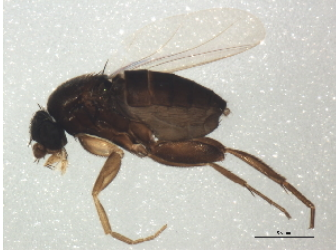

**BIOUG01434-C12 [Lateral]**  
 Phoridae  
 Family: Phoridae  
 BIN URI: BOLD:AAU6541

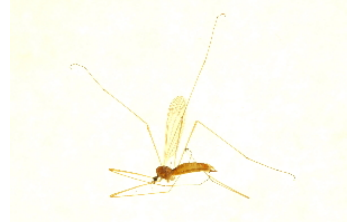

**10BBTIP-0224 [Lateral]**  
 Limoniidae  
 Family: Limoniidae  
 BIN URI: BOLD:AAV1796

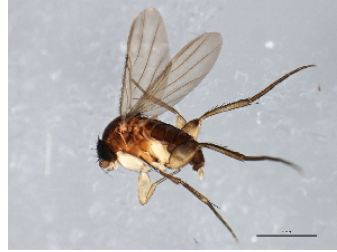

**08TTML-1200 [Lateral]**  
 Phoridae  
 Family: Phoridae  
 BIN URI: BOLD:AAM7379

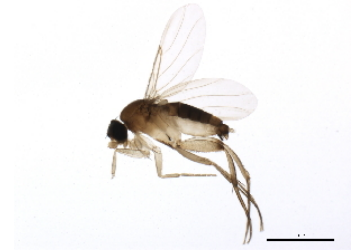

**BIOUG01448-E06 [Lateral]**  
 Phoridae  
 Family: Phoridae  
 BIN URI: BOLD:AAP6420

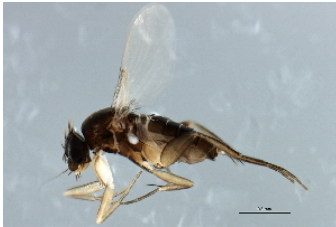

**09BBDIP-1742 [Lateral]**  
 Phoridae  
 Family: Phoridae  
 BIN URI: BOLD:AAG3286

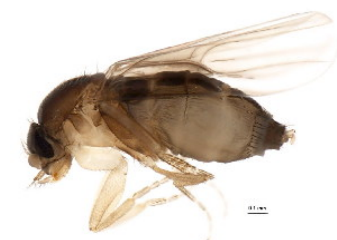

**BIOUG01426-H09 [Lateral]**  
 Phoridae  
 Family: Phoridae  
 BIN URI: BOLD:AAN8682

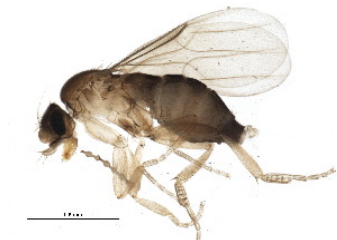

**BIOUG21410-D01 [Lateral]**  
 Diptera  
 BIN URI: BOLD:ACU8783

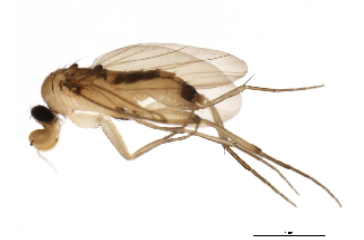

**09BBEDI-1844 [Lateral]**  
 Phoridae  
 Family: Phoridae  
 BIN URI: BOLD:AAG3338

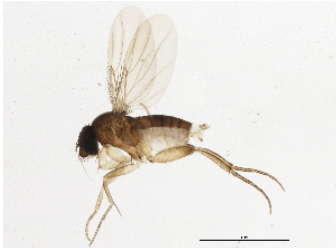

**BIOUG02936-G12 [Lateral]**  
 Phoridae  
 Family: Phoridae  
 BIN URI: BOLD:AAG3273

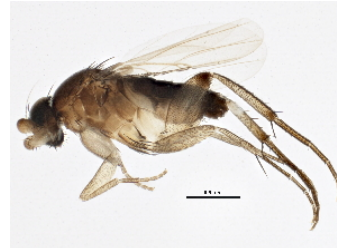

**BIOUG03437-C04 [Lateral]**  
 Phoridae  
 Family: Phoridae  
 BIN URI: BOLD:AAU5598

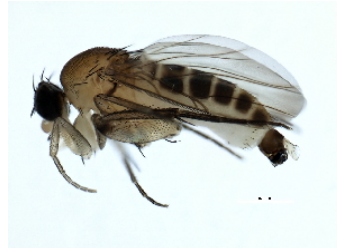

**09BBEDI-2391 [Lateral]**  
 Phoridae  
 Family: Phoridae  
 BIN URI: BOLD:AAG3320

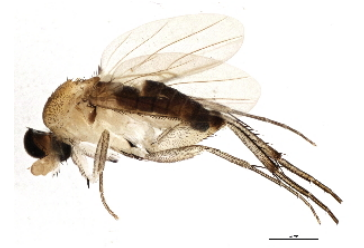

**BIOUG02892-A02 [Lateral]**  
 Phoridae  
 Family: Phoridae  
 BIN URI: BOLD:AAU6526

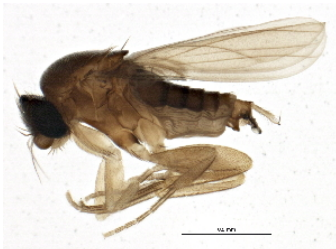

**BIOUG02056-C06 [Lateral]**  
 Phoridae  
 Family: Phoridae  
 BIN URI: BOLD:ABW5540

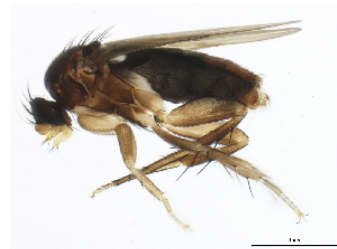

**BIOUG01403-D12 [Lateral]**  
 Phoridae  
 Family: Phoridae  
 BIN URI: BOLD:ABV3316

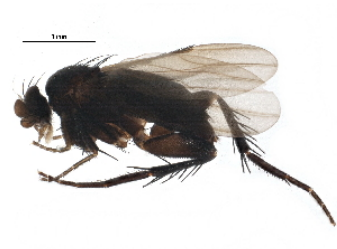

**BIOUG21613-F04 [Lateral]**  
 Phoridae  
 Family: Phoridae  
 BIN URI: BOLD:ACV2632

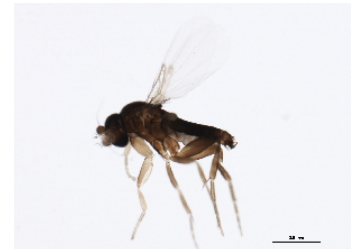

**09PROBE-JW0701 [Lateral]**  
 Phoridae  
 Family: Phoridae  
 BIN URI: BOLD:AAG3314

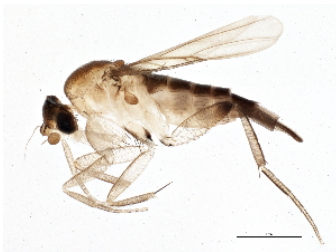

**BIOUG02928-G09 [Lateral]**  
 Phoridae  
 Family: Phoridae  
 BIN URI: BOLD:ACA4351

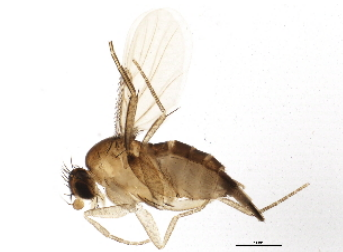

**BIOUG02958-C11 [Lateral]**  
 Phoridae  
 Family: Phoridae  
 BIN URI: BOLD:AAP4676

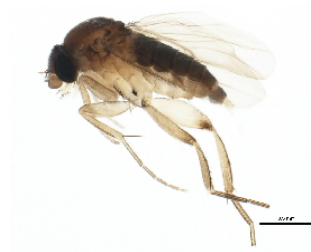

**BIOUG01306-A03 [Lateral]**  
 Phoridae  
 Family: Phoridae  
 BIN URI: BOLD:AAU6511

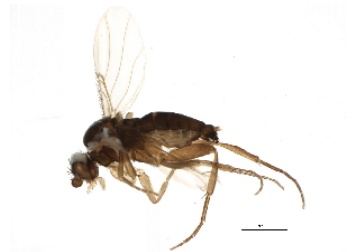

**BIOUG01299-G04 [Lateral]**  
 Phoridae  
 Family: Phoridae  
 BIN URI: BOLD:AAM9355

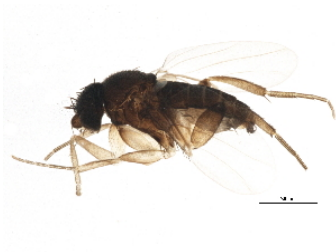

**BIOUG01493-D10 [Lateral]**  
 Phoridae  
 Family: Phoridae  
 BIN URI: BOLD:ABW8037

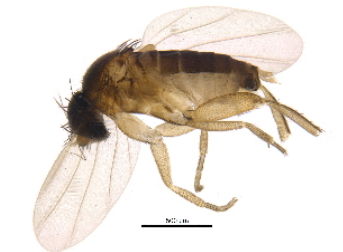

**BIOUG22329-B08 [Lateral]**  
 Phoridae  
 Family: Phoridae  
 BIN URI: BOLD:AAG3241

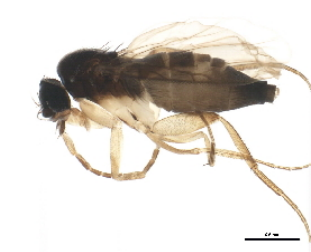

**BIOUG01130-C08 [Lateral]**  
 Phoridae  
 Family: Phoridae  
 BIN URI: BOLD:AAM9364

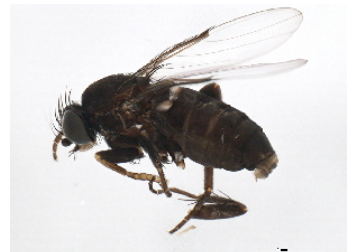

**10PHMAL-1216 [Lateral]**  
 Phoridae  
 Family: Phoridae  
 BIN URI: BOLD:AAM9376

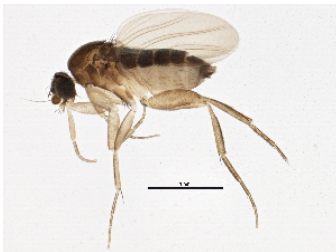

**BIOUG03934-C09 [Lateral]**  
 Phoridae  
 Family: Phoridae  
 BIN URI: BOLD:ACA6461

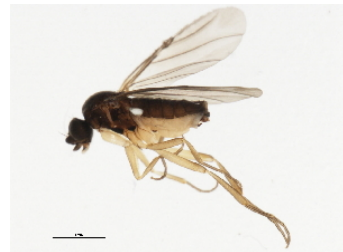

**09BBDIP-1288 [Lateral]**  
 Phoridae  
 Family: Phoridae  
 BIN URI: BOLD:AAG3292

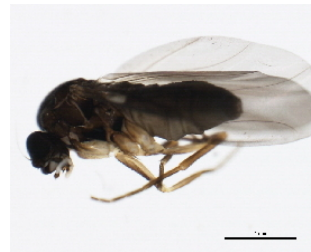

**10BBDIP-0933 [Lateral]**  
 Phoridae  
 Family: Phoridae  
 BIN URI: BOLD:AAP8118

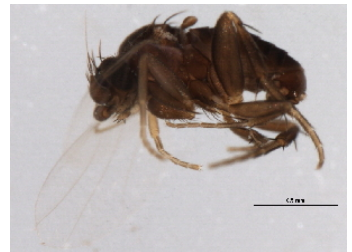

**08TTML-2200 [Lateral]**  
 Phoridae  
 Family: Phoridae  
 BIN URI: BOLD:AAG3331

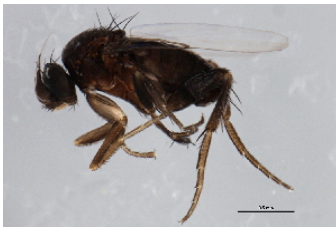

**08TTML-0782 [Lateral]**  
 Phoridae  
 Family: Phoridae  
 BIN URI: BOLD:AAN8685

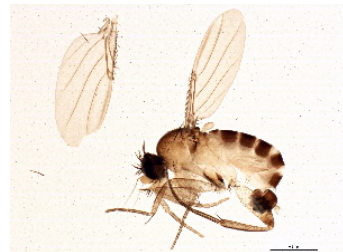

**BIOUG02624-F04 [Lateral]**  
 Phoridae  
 Family: Phoridae  
 BIN URI: BOLD:AAN8687

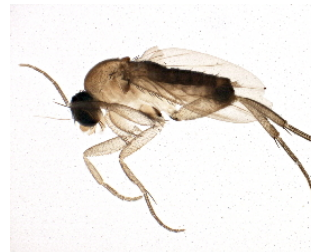

**BIOUG02511-E08 [Lateral]**  
 Phoridae  
 Family: Phoridae  
 BIN URI: BOLD:ACT8182

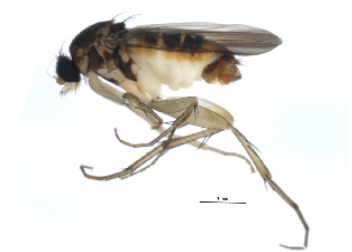

**10JSROW-0499 [Lateral]**  
 Phoridae  
 Family: Phoridae  
 BIN URI: BOLD:AAP2487

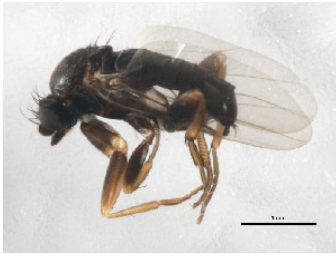

**10JSROW-0141 [Lateral]**  
 Phoridae  
 Family: Phoridae  
 BIN URI: BOLD:AAP4697

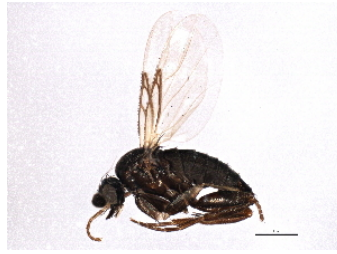

**BIOUG05643-D09 [Lateral]**  
 Phoridae  
 Family: Phoridae  
 BIN URI: BOLD:AAP6409

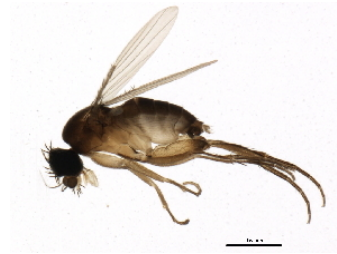

**BIOUG01122-E06 [Lateral]**  
 Phoridae  
 Family: Phoridae  
 BIN URI: BOLD:AAM7996

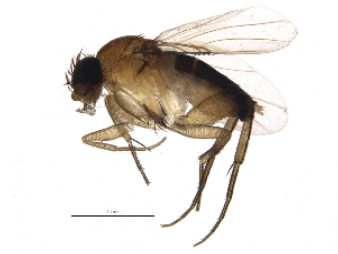

**BIOUG11609-F03 [Lateral]**  
 Phoridae  
 Family: Phoridae  
 BIN URI: BOLD:AAU8534

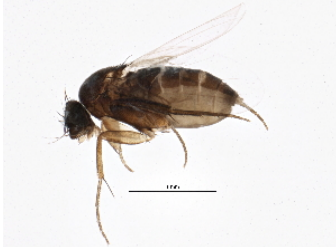

**BIOUG02828-D12 [Lateral]**  
 Phoridae  
 Family: Phoridae  
 BIN URI: BOLD:ABX8608

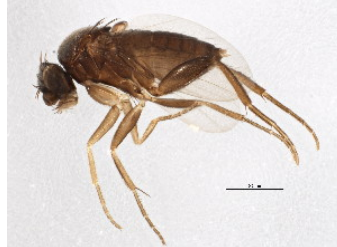

**BIOUG01511-G03 [Lateral]**  
 Phoridae  
 Family: Phoridae  
 BIN URI: BOLD:ABW8053

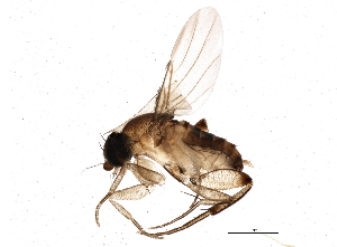

**BIOUG03027-E10 [Lateral]**  
 Phoridae  
 Family: Phoridae  
 BIN URI: BOLD:ACA6021

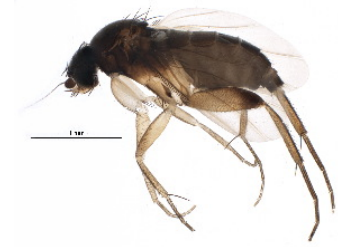

**BIOUG22295-E03 [Lateral]**  
 Megaselia  
 Family: Phoridae  
 BIN URI: BOLD:AAH8693

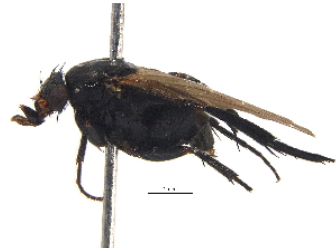

**BIOUG13609-H11 [Lateral]**  
 Hypocera  
 Family: Phoridae  
 BIN URI: BOLD:ACO8914

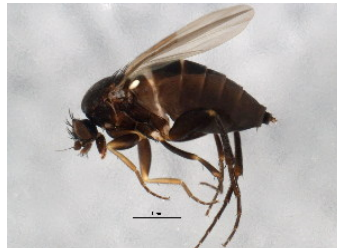

**BIOUG01408-B08 [Lateral]**  
 Phoridae  
 Family: Phoridae  
 BIN URI: BOLD:AAG3236

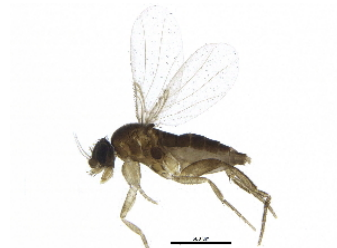

**BIOUG08193-E02 [Lateral]**  
 Megaselia  
 Family: Phoridae  
 BIN URI: BOLD:ACJ5224

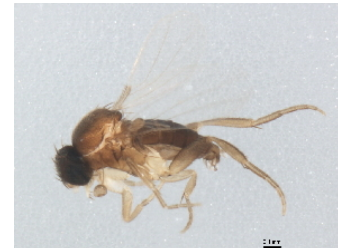

**BIOUG01132-F02 [Lateral]**  
 Phoridae  
 Family: Phoridae  
 BIN URI: BOLD:AAZ0308

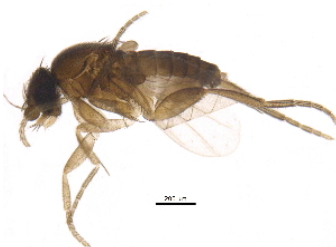

**BIOUG23078-D08 [Lateral]**  
 Phoridae  
 Family: Phoridae  
 BIN URI: BOLD:ACV5239

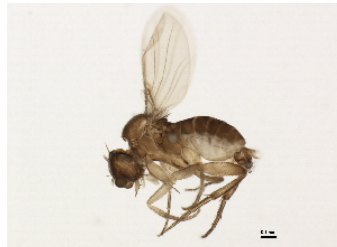

**BIOUG01126-F06 [Lateral]**  
 Phoridae  
 Family: Phoridae  
 BIN URI: BOLD:AAU6600

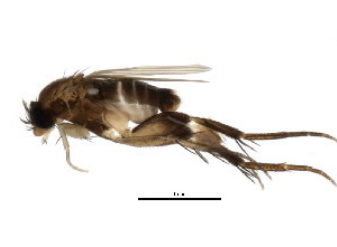

**BIOUG00978-E02 [Lateral]**  
 Phoridae  
 Family: Phoridae  
 BIN URI: BOLD:AAH8699

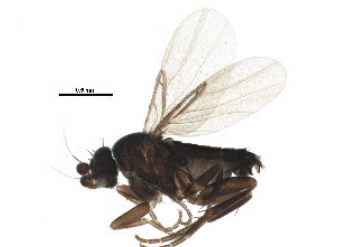

**BIOUG22293-G12 [Lateral]**  
 Phoridae  
 Family: Phoridae  
 BIN URI: BOLD:ACV3950

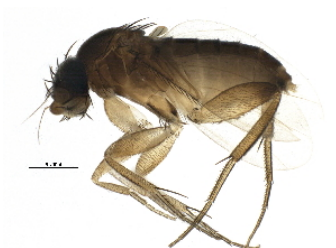

**BIOUG08937-F07 [Lateral]**  
 Megaselia  
 Family: Phoridae  
 BIN URI: BOLD:ACL5005

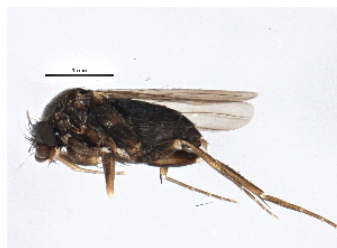

**BIOUG02590-B01 [Lateral]**  
 Phoridae  
 Family: Phoridae  
 BIN URI: BOLD:ABA1214

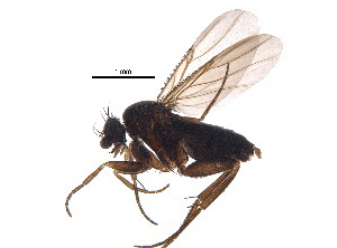

**BIOUG22357-A01 [Lateral]**  
 Phoridae  
 Family: Phoridae  
 BIN URI: BOLD:ABA1225

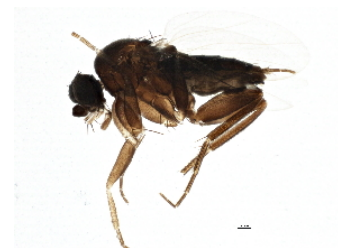

**BIOUG05913-H11 [Lateral]**  
 Phoridae  
 Family: Phoridae  
 BIN URI: BOLD:AAG3316

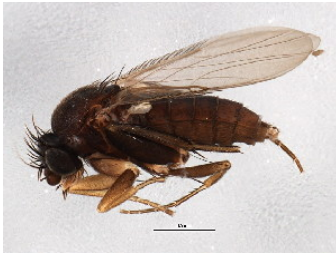

**BIOUG01923-G05 [Lateral]**  
 Phoridae  
 Family: Phoridae  
 BIN URI: BOLD:AAG3235

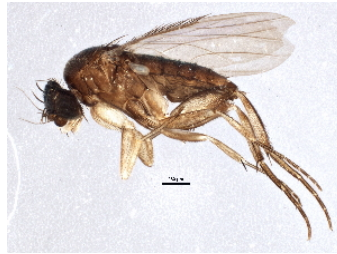

**BIOUG06382-B07 [Lateral]**  
 Phoridae  
 Family: Phoridae  
 BIN URI: BOLD:AAG3237

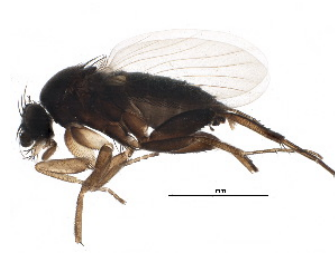

**BIOUG22416-B09 [Lateral]**  
 Megaselia  
 Family: Phoridae  
 BIN URI: BOLD:AAP8724

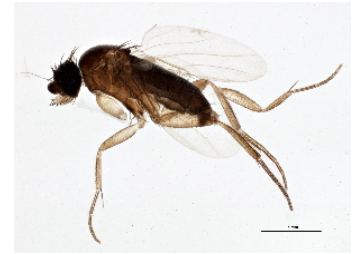

**BIOUG02873-C12 [Lateral]**  
 Phoridae  
 Family: Phoridae  
 BIN URI: BOLD:ABY1910

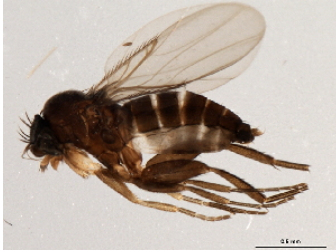

**08TTML-1876 [Lateral]**  
 Phoridae  
 Family: Phoridae  
 BIN URI: BOLD:AAN8700

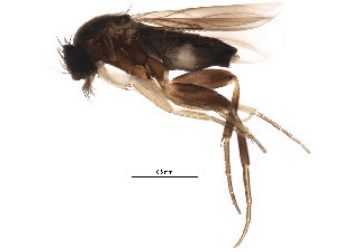

**BIOUG01389-E03 [Lateral]**  
 Phoridae  
 Family: Phoridae  
 BIN URI: BOLD:ABU5533

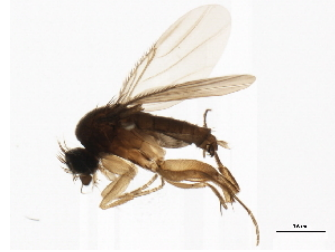

**BIOUG01122-B08 [Lateral]**  
 Phoridae  
 Family: Phoridae  
 BIN URI: BOLD:AAM9346

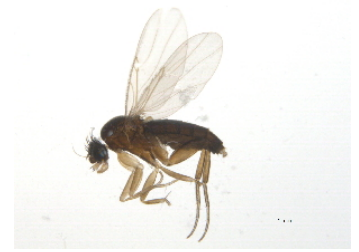

**BIOUG03695-H01 [Lateral]**  
 Phoridae  
 Family: Phoridae  
 BIN URI: BOLD:ACB9689

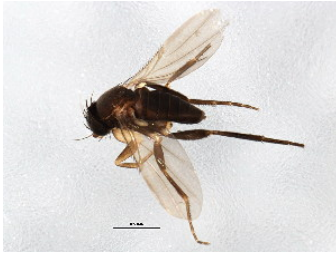

**BIOUG01953-A05 [Lateral]**  
 Phoridae  
 Family: Phoridae  
 BIN URI: BOLD:AAL9079

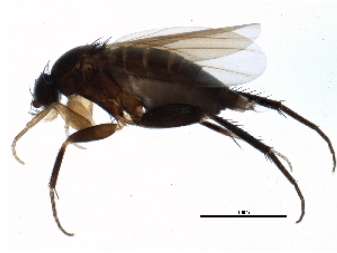

**BIOUG11828-C05 [Lateral]**  
 Phoridae  
 Family: Phoridae  
 BIN URI: BOLD:ACM9794

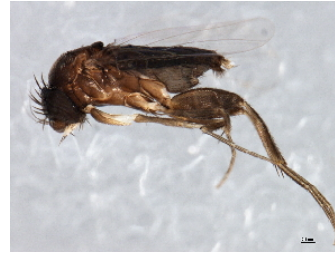

**08TTML-1181 [Lateral]**  
 Phoridae  
 Family: Phoridae  
 BIN URI: BOLD:AAN8692

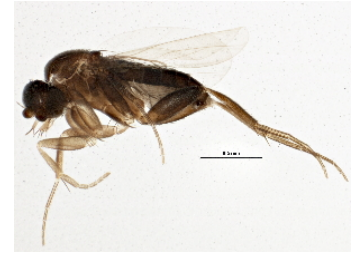

**BIOUG02850-G12 [Lateral]**  
 Phoridae  
 Family: Phoridae  
 BIN URI: BOLD:ABY9755

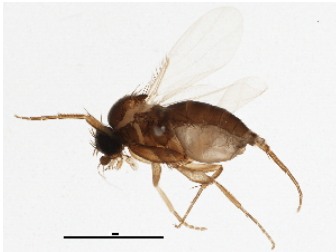

**BIOUG01618-F05 [Lateral]**  
 Phoridae  
 Family: Phoridae  
 BIN URI: BOLD:ACW3172

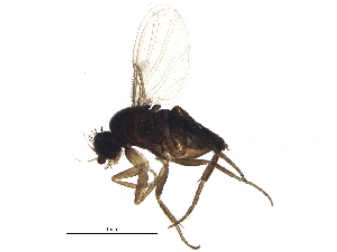

**BIOUG09634-F08 [Lateral]**  
 Phoridae  
 Family: Phoridae  
 BIN URI: BOLD:ACL7279

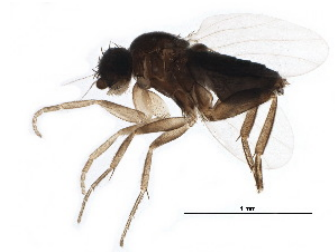

**BIOUG22416-D09 [Lateral]**  
 Phoridae  
 Family: Phoridae  
 BIN URI: BOLD:ACV3899

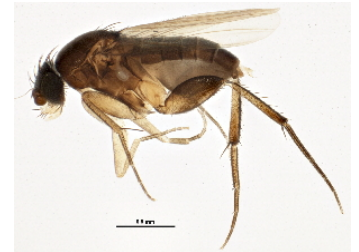

**BIOUG05535-E08 [Lateral]**  
 Phoridae  
 Family: Phoridae  
 BIN URI: BOLD:AAG3323

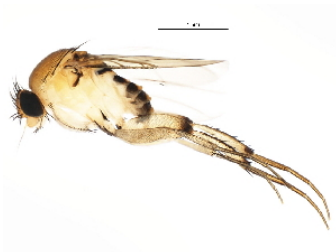

**10JSROW-1069 [Lateral]**  
 Phoridae  
 Family: Phoridae  
 BIN URI: BOLD:AAG3343

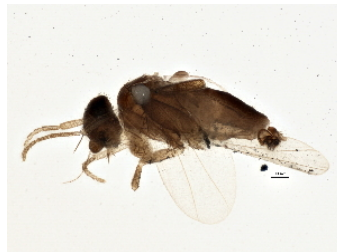

**BIOUG02670-G11 [Lateral]**  
 Phoridae  
 Family: Phoridae  
 BIN URI: BOLD:AAU6510

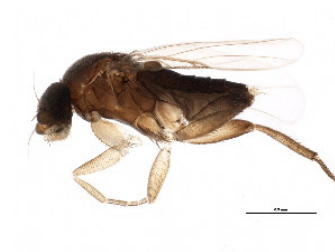

**BIOUG01512-G04 [Lateral]**  
 Phoridae  
 Family: Phoridae  
 BIN URI: BOLD:AAY6426

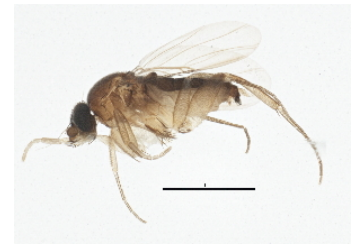

**BIOUG01505-H01 [Lateral]**  
 Phoridae  
 Family: Phoridae  
 BIN URI: BOLD:ABW7895



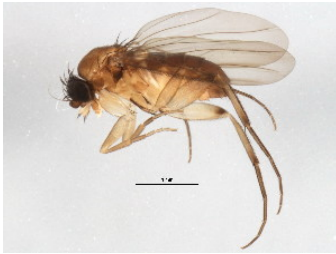

**BIOUG01914-D12 [Lateral]**  
Phoridae  
Family: Phoridae  
BIN URI: BOLD:AAG3304

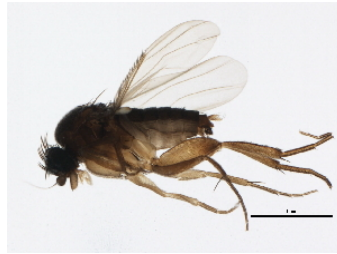

**BIOUG01123-D12 [Lateral]**  
Phoridae  
Family: Phoridae  
BIN URI: BOLD:AAV6384

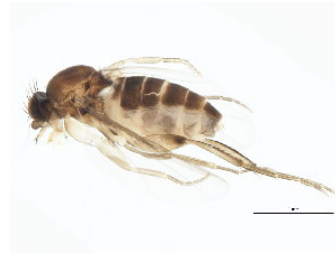

**10BBDIP-0620 [Lateral]**  
Phoridae  
Family: Phoridae  
BIN URI: BOLD:AAN8711

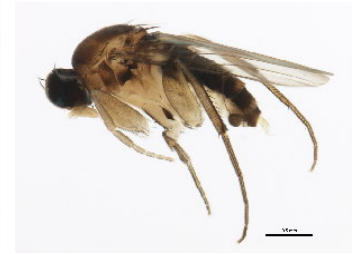

**10PHMAL-2791 [Lateral]**  
Phoridae  
Family: Phoridae  
BIN URI: BOLD:AAU6538

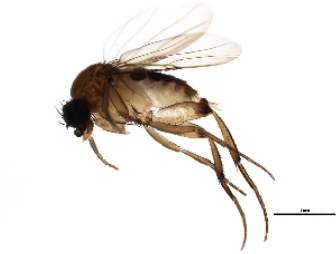

**10PHMAL-1325 [Lateral]**  
Phoridae  
Family: Phoridae  
BIN URI: BOLD:AAM9378

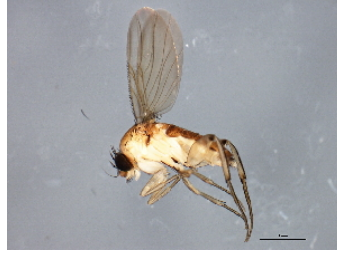

**08TTML-1129 [Lateral]**  
Phoridae  
Family: Phoridae  
BIN URI: BOLD:AAM9375

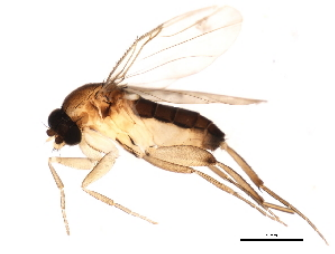

**09BBEDI-2707 [Lateral]**  
Phoridae  
Family: Phoridae  
BIN URI: BOLD:AAG3261

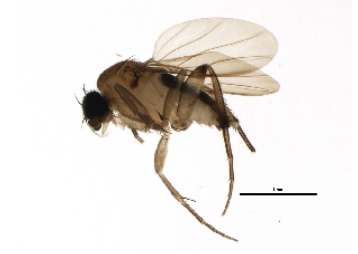

**BIOUG01122-B07 [Lateral]**  
Phoridae  
Family: Phoridae  
BIN URI: BOLD:AAN8705

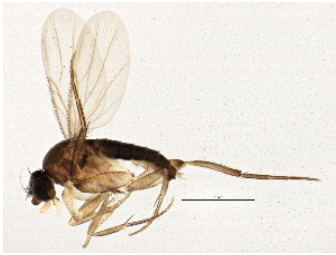

**BIOUG03277-E08 [Lateral]**  
Phoridae  
Family: Phoridae  
BIN URI: BOLD:ACA8351

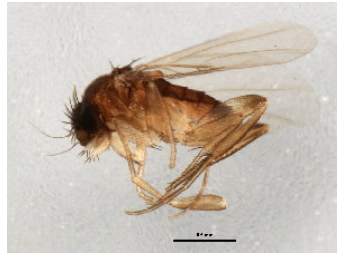

**BIOUG01929-C05 [Lateral]**  
Phoridae  
Family: Phoridae  
BIN URI: BOLD:AAU5599

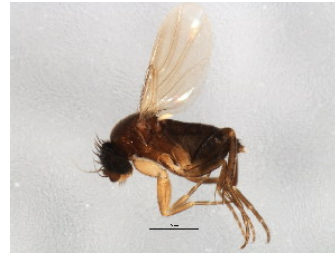

**BIOUG01920-B11 [Lateral]**  
Phoridae  
Family: Phoridae  
BIN URI: BOLD:AAL9075

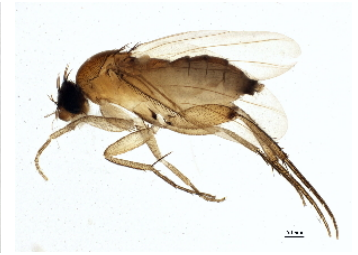

**BIOUG02965-E03 [Lateral]**  
Phoridae  
Family: Phoridae  
BIN URI: BOLD:ABU5535

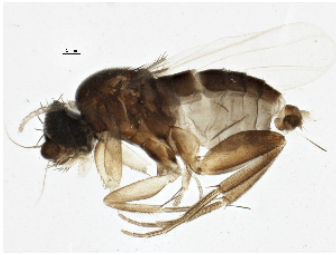

**BIOUG03343-F12 [Lateral]**  
Phoridae  
Family: Phoridae  
BIN URI: BOLD:ACA5842

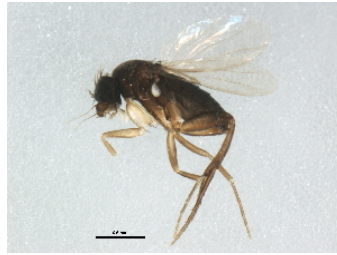

**BIOUG01479-E05 [Lateral]**  
Phoridae  
Family: Phoridae  
BIN URI: BOLD:AAU6533

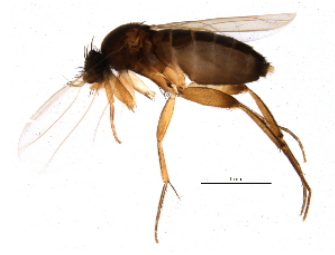

**BIOUG04791-F12 [Lateral]**  
Phoridae  
Family: Phoridae  
BIN URI: BOLD:ACE1572

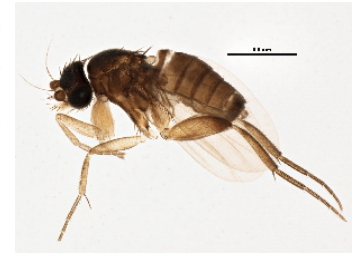

**BIOUG05742-C08 [Lateral]**  
Phoridae  
Family: Phoridae  
BIN URI: BOLD:AAO8579

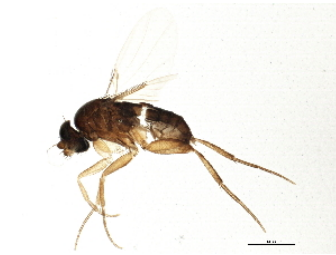

**BIOUG05870-B09 [Lateral]**  
Phoridae  
Family: Phoridae  
BIN URI: BOLD:ACG7292

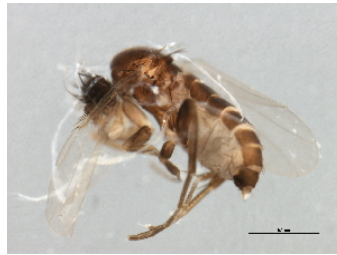

**09BBEDI-0970 [Lateral]**  
Megaselia  
Family: Phoridae  
BIN URI: BOLD:AAG3318

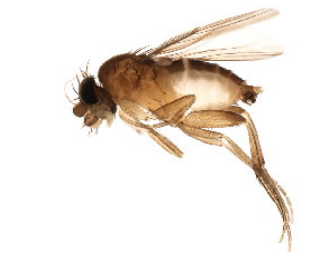

**BIOUG01426-F09 [Lateral]**  
Phoridae  
Family: Phoridae  
BIN URI: BOLD:ABU5538

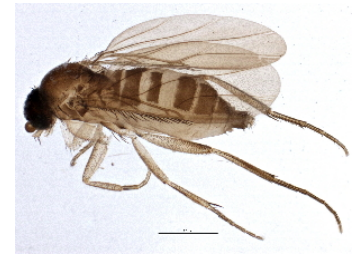

**BIOUG05986-H09 [Lateral]**  
Phoridae  
Family: Phoridae  
BIN URI: BOLD:AAM9365

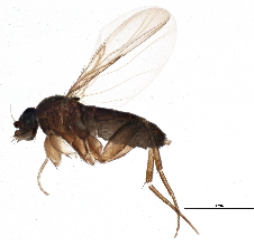

**BIOUG02647-H09 [Lateral]**  
 Megaselia  
 Family: Phoridae  
 BIN URI: BOLD:AAG3266

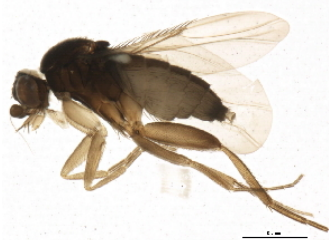

**BIOUG01302-C02 [Lateral]**  
 Phoridae  
 Family: Phoridae  
 BIN URI: BOLD:AAG3340

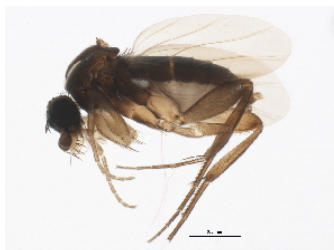

**BIOUG01445-G07 [Lateral]**  
 Phoridae  
 Family: Phoridae  
 BIN URI: BOLD:AAU6524

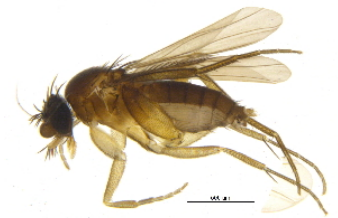

**BIOUG03249-H08 [Lateral]**  
 Megaselia  
 Family: Phoridae  
 BIN URI: BOLD:ABU5528

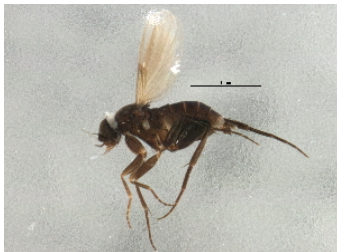

**BIOUG03736-A05 [Lateral]**  
 Phoridae  
 Family: Phoridae  
 BIN URI: BOLD:AAG3302

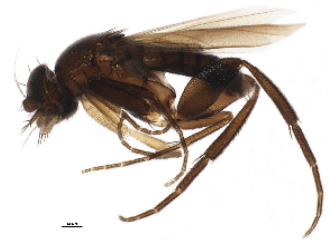

**BIOUG03824-H03 [Lateral]**  
 Megaselia  
 Family: Phoridae  
 BIN URI: BOLD:AAG3275

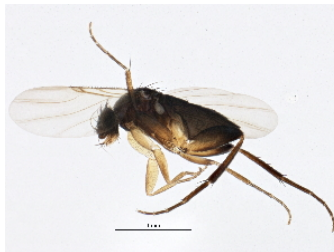

**BIOUG03736-G09 [Lateral]**  
 Megaselia  
 Family: Phoridae  
 BIN URI: BOLD:AAP6410

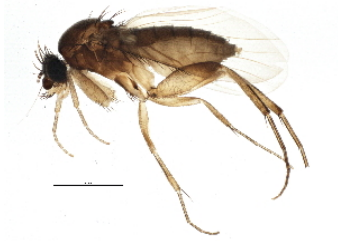

**BIOUG04290-A04 [Lateral]**  
 Phoridae  
 Family: Phoridae  
 BIN URI: BOLD:AAG3274

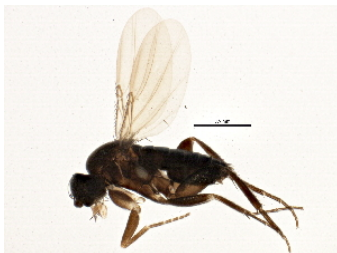

**BIOUG05521-A04 [Lateral]**  
 Phoridae  
 Family: Phoridae  
 BIN URI: BOLD:ABU5529

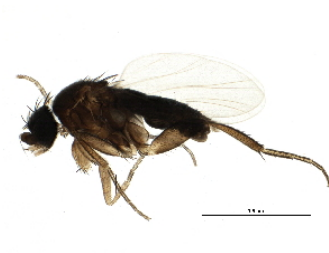

**BIOUG22366-D02 [Lateral]**  
 Phoridae  
 Family: Phoridae  
 BIN URI: BOLD:ACD8848

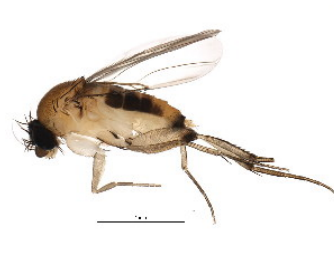

**BIOUG01352-C08 [Lateral]**  
 Phoridae  
 Family: Phoridae  
 BIN URI: BOLD:AAG3259

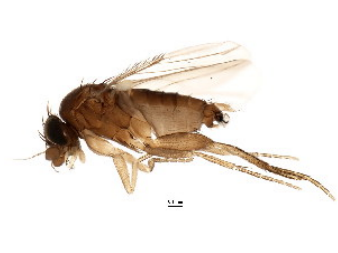

**BIOUG01915-G08 [Lateral]**  
 Phoridae  
 Family: Phoridae  
 BIN URI: BOLD:AAG3260

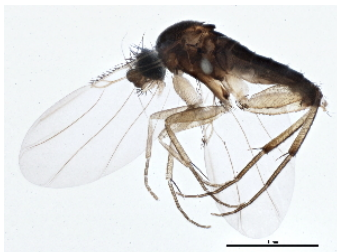

**BIOUG05544-F03 [Lateral]**  
 Phoridae  
 Family: Phoridae  
 BIN URI: BOLD:AAL9076

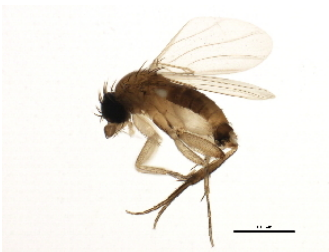

**BIOUG01302-G01 [Lateral]**  
 Phoridae  
 Family: Phoridae  
 BIN URI: BOLD:AAG3248

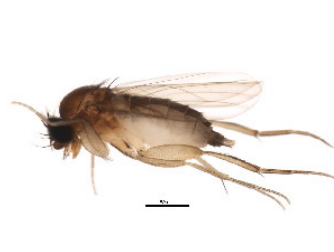

**BIOUG01400-F05 [Lateral]**  
 Phoridae  
 Family: Phoridae  
 BIN URI: BOLD:AAM9347

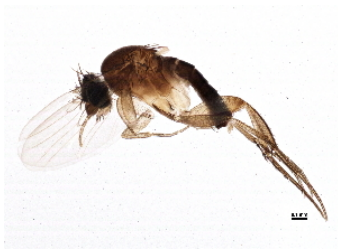

**BIOUG02979-G05 [Lateral]**  
 Phoridae  
 Family: Phoridae  
 BIN URI: BOLD:AAN8679

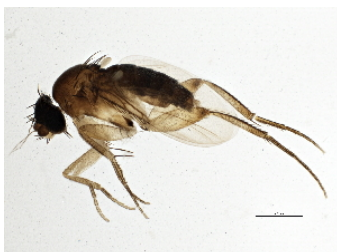

**BIOUG03908-E03 [Lateral]**  
 Phoridae  
 Family: Phoridae  
 BIN URI: BOLD:AAZ6701

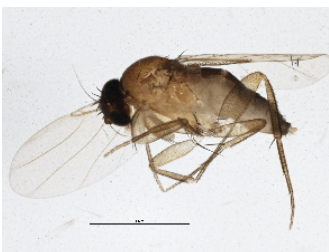

**BIOUG05720-B11 [Lateral]**  
 Phoridae  
 Family: Phoridae  
 BIN URI: BOLD:AAP4687

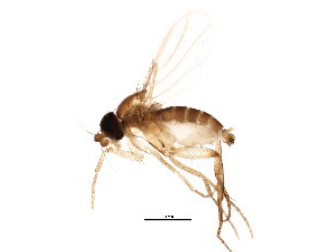

**BIOUG01664-E08 [Lateral]**  
 Phoridae  
 Family: Phoridae  
 BIN URI: BOLD:AAU5682

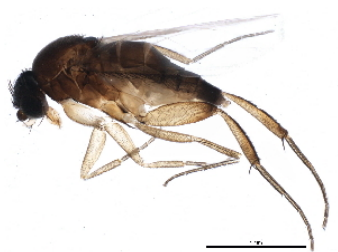

**BIOUG05545-H07 [Lateral]**  
 Phoridae  
 Family: Phoridae  
 BIN URI: BOLD:AAU6624

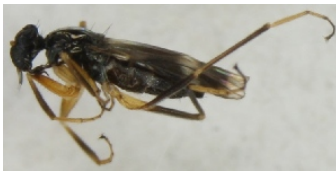

**jka11-00966 [Lateral]**  
*Tachydromia aemula*  
 Family: Hybotidae  
 BIN URI: BOLD:AAN5500

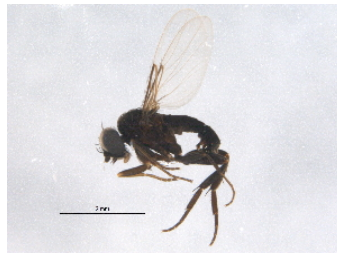

**BIOUG03479-E05 [Lateral]**  
 Phoridae  
 Family: Phoridae  
 BIN URI: BOLD:ACB0980

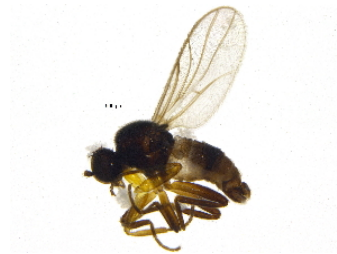

**BIOUG03345-A07 [Lateral]**  
 Platypalpus  
 Family: Hybotidae  
 BIN URI: BOLD:AAN5503

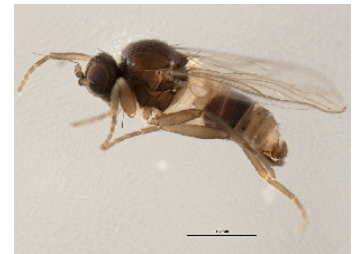

**10BBCCDIP-3328 [Lateral]**  
 Hybotidae  
 Family: Hybotidae  
 BIN URI: BOLD:AAV3698

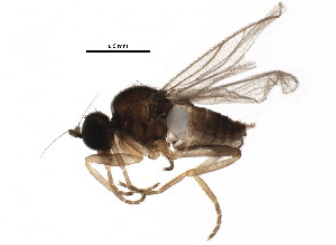

**BIOUG23073-C04 [Lateral]**  
 Hybotidae  
 Family: Hybotidae  
 BIN URI: BOLD:ACV5183

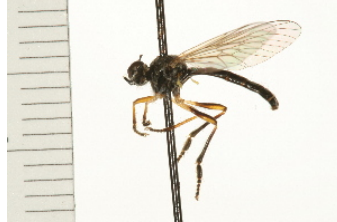

**DIPT 0006.02 [Lateral]**  
 Asilidae  
 Family: Asilidae  
 BIN URI: BOLD:AAH2293

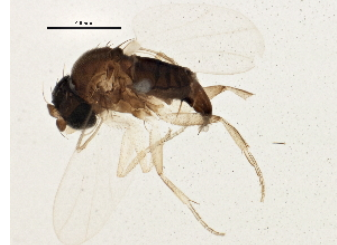

**BIOUG03910-B02 [Lateral]**  
 Phoridae  
 Family: Phoridae  
 BIN URI: BOLD:ABA8289

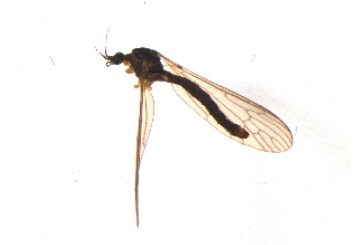

**10PROBE-10299 [Lateral]**  
*Pseudolimnophila inornata*  
 Family: Limoniidae  
 BIN URI: BOLD:AAI1351

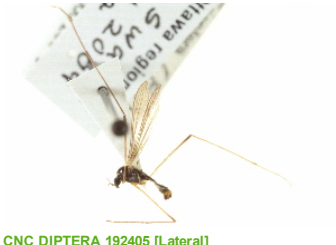

**CNC DIPTERA 192405 [Lateral]**  
*Erioptera ebenina*  
 Family: Limoniidae  
 BIN URI: BOLD:ACB0353

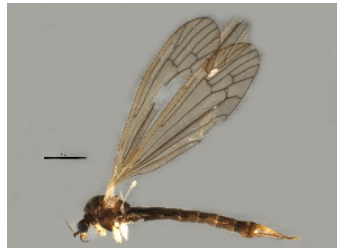

**BIOUG09060-A01 [Lateral]**  
 Limoniidae  
 Family: Limoniidae  
 BIN URI: BOLD:ACL7587

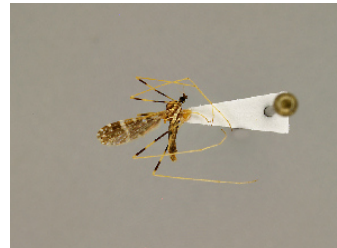

**CMNH576021 [Lateral]**  
*Erioptera caliptera*  
 Family: Limoniidae  
 BIN URI: BOLD:AAN5882

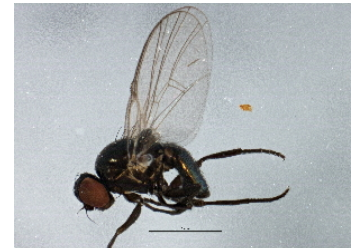

**BIOUG03057-D08 [Lateral]**  
 Agromyzidae  
 Family: Agromyzidae  
 BIN URI: BOLD:AAQ0692

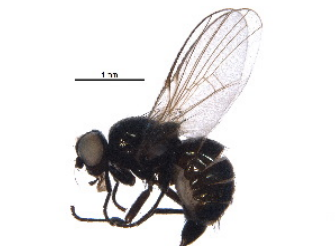

**BIOUG22454-D11 [Lateral]**  
 Agromyzidae  
 Family: Agromyzidae  
 BIN URI: BOLD:ACK1565

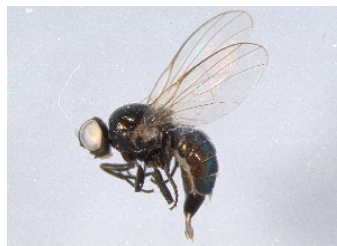

**BIOUG05666-C03 [Lateral]**  
 Agromyzidae  
 Family: Agromyzidae  
 BIN URI: BOLD:ACK1603

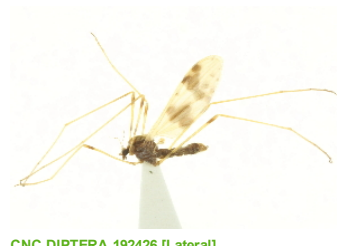

**CNC DIPTERA 192426 [Lateral]**  
*Ilisia venusta*  
 Family: Limoniidae  
 BIN URI: BOLD:ACA9724

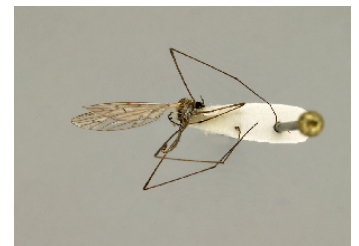

**CMNH576084 [Lateral]**  
 Symplecta  
 Family: Limoniidae  
 BIN URI: BOLD:AAF9014

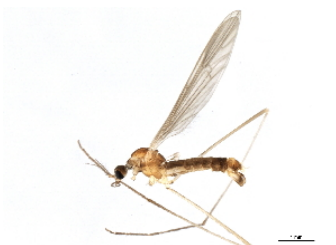

**BIOUG01392-A08 [Lateral]**  
*Ormosia affinis*  
 Family: Limoniidae  
 BIN URI: BOLD:AAU6544

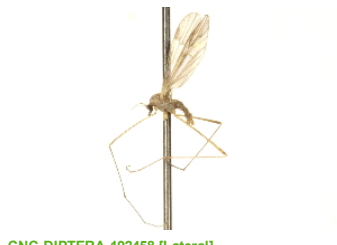

**CNC DIPTERA 192458 [Lateral]**  
*Ormosia meigenii*  
 Family: Limoniidae  
 BIN URI: BOLD:ACA9818

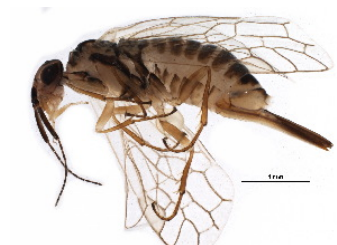

**BIOUG22420-G09 [Lateral]**  
 Xyelidae  
 Family: Xyelidae  
 BIN URI: BOLD:ACS9433

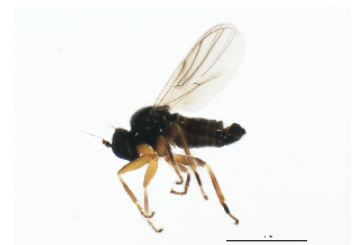

**BIOUG01403-H07 [Lateral]**  
 Hybotidae  
 Family: Hybotidae  
 BIN URI: BOLD:AAN5501

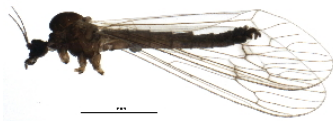

**BIOUG21589-C09 [Lateral]**  
Trichocera  
Family: Trichoceridae  
BIN URI: BOLD:ACF7745

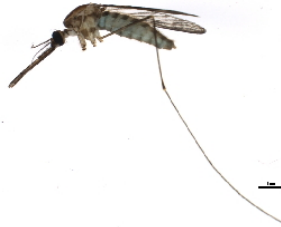

**BIOUG00904-D11 [Lateral]**  
Anopheles quadrimaculatus  
Family: Culicidae  
BIN URI: BOLD:AAC2281

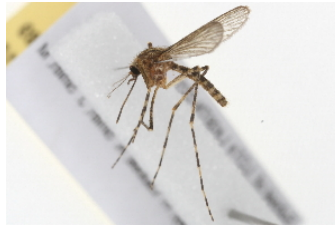

**09BBEDI-1089 [Lateral]**  
Coquillettia perturbans  
Family: Culicidae  
BIN URI: BOLD:AAB2539

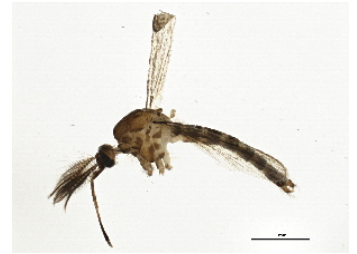

**BIOUG03219-B11 [Lateral]**  
Coquillettia perturbans  
Family: Culicidae  
BIN URI: BOLD:AAI1618

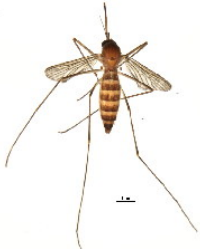

**BIOUG00938-E09 [Dorsal]**  
Culex restuans  
Family: Culicidae  
BIN URI: BOLD:AAA7661

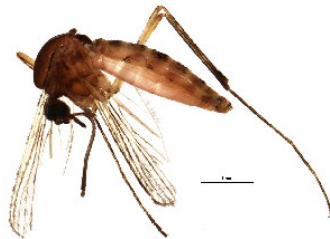

**BIOUG01349-H05 [Lateral]**  
Culicidae  
Family: Culicidae  
BIN URI: BOLD:AAB6943

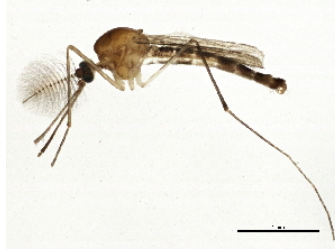

**BIOUG03219-F12 [Lateral]**  
Culex territans  
Family: Culicidae  
BIN URI: BOLD:ABY7666

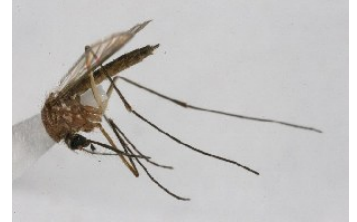

**JE010 [Lateral]**  
Aedes cinereus  
Family: Culicidae  
BIN URI: BOLD:AAC1222

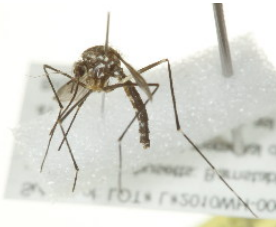

**TDWG-0239 [Lateral]**  
Aedes japonicus  
Family: Culicidae  
BIN URI: BOLD:AAC5210

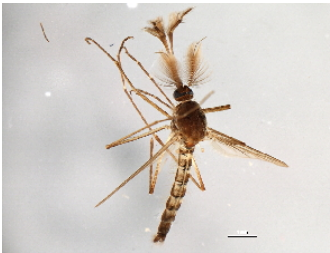

**08TTML-2120 [Dorsal]**  
Culicidae  
Family: Culicidae  
BIN URI: BOLD:AAA7067

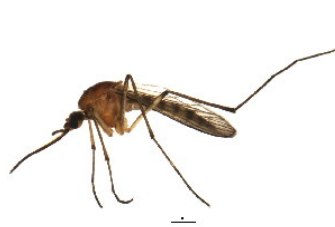

**BIOUG01344-D02 [Lateral]**  
Culicidae  
Family: Culicidae  
BIN URI: BOLD:AAD4355

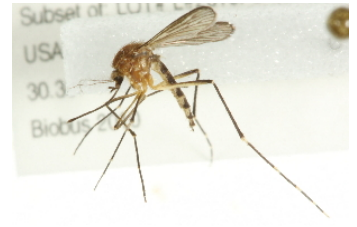

**10BBDIP-0254 [Lateral]**  
Culicidae  
Family: Culicidae  
BIN URI: BOLD:AAB5696

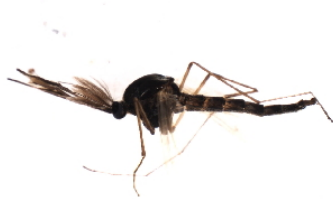

**09PROBE-JW0432 [Lateral]**  
Aedes punctor subgroup  
Family: Culicidae  
BIN URI: BOLD:AAA3748

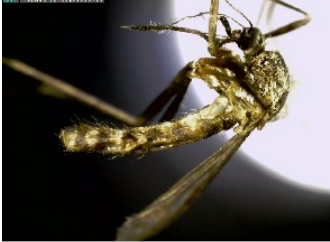

**AIOM-055 [Specimen]**  
Aedes triseriatus  
Family: Culicidae  
BIN URI: BOLD:AAC9476

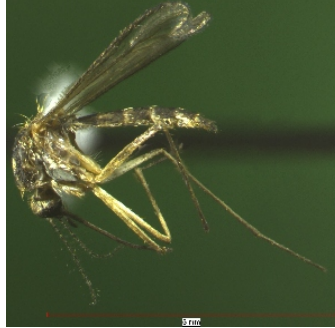

**NEONTculicid853 [Lateral]**  
Aedes trivittatus  
Family: Culicidae  
BIN URI: BOLD:AAC9486

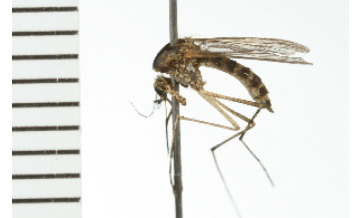

**08BBDIP-0938 [Lateral]**  
Ochlerotatus fitchii  
Family: Culicidae  
BIN URI: BOLD:AAC9062

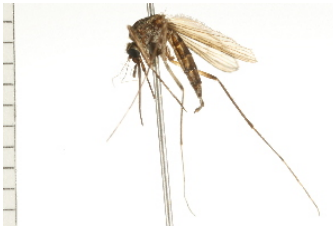

**08BBDIP-1669 [Lateral]**  
Aedes fitchii  
Family: Culicidae  
BIN URI: BOLD:AAD8027

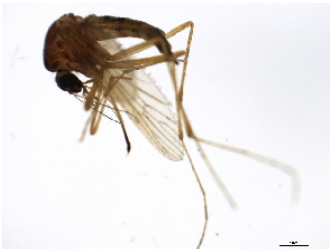

**10BBBDIP-0952 [Lateral]**  
Aedes euedes  
Family: Culicidae  
BIN URI: BOLD:AAD4406

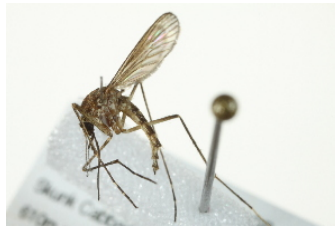

**10BBBDIP-2303 [Lateral]**  
Ochlerotatus excrucians  
Family: Culicidae  
BIN URI: BOLD:AAB1098

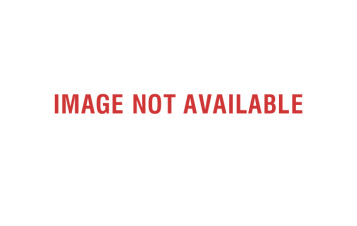

**IMAGE NOT AVAILABLE**

**BIOUG22843-G04**  
Aedes stimulans  
Family: Culicidae

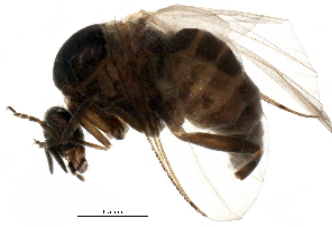

**BIOUG22359-B10 [Lateral]**  
Stegopterna  
Family: Simuliidae  
BIN URI: BOLD: AAB7514

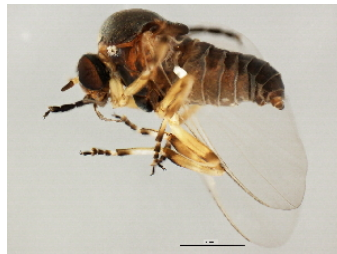

**10BBCDIP-3050 [Lateral]**  
Simulium decorum  
Family: Simuliidae  
BIN URI: BOLD: AAB7749

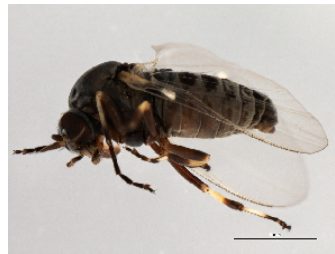

**08TTML-2051 [Lateral]**  
Simuliidae  
Family: Simuliidae  
BIN URI: BOLD: AAA4121

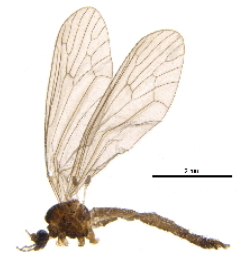

**BIOUG21482-B07 [Lateral]**  
Trichocera  
Family: Trichoceridae  
BIN URI: BOLD: ABW7619

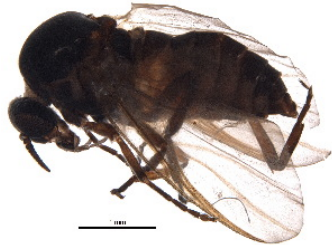

**BIOUG22356-H05 [Lateral]**  
Prosimulium arvum  
Family: Simuliidae  
BIN URI: BOLD: AAD4764

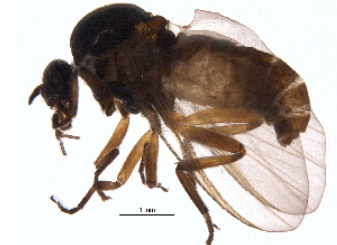

**BIOUG11175-B12 [Lateral]**  
Prosimulium mixtum  
Family: Simuliidae  
BIN URI: BOLD: AAG7032

**IMAGE NOT AVAILABLE**

**BIOUG22237-C07**  
Prosimulium mixtum  
Family: Simuliidae

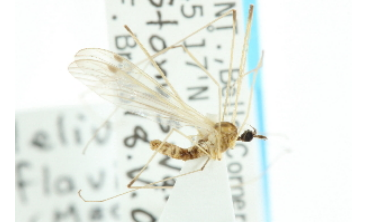

**CNC DIPTERA 106614 [Lateral]**  
Helius flavipes  
Family: Limoniidae  
BIN URI: BOLD: AAF9008

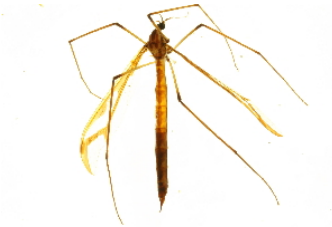

**08TTML-2418 [Dorsal]**  
Pedicia  
Family: Pediciidae  
BIN URI: BOLD: AAF9045

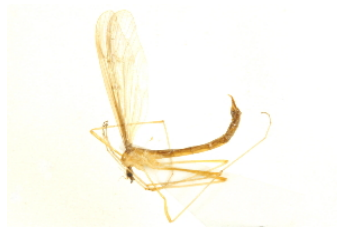

**CNC DIPTERA 192485 [Lateral]**  
Tricyphona inconstans  
Family: Pediciidae  
BIN URI: BOLD: ACV1010

**IMAGE NOT AVAILABLE**

**BIOUG24024-C03**  
Tricyphona  
Family: Pediciidae

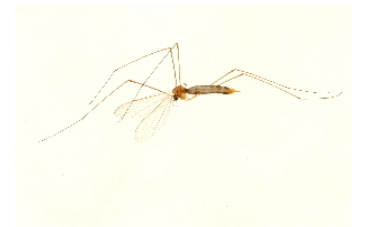

**09ELEPT-045 [Lateral]**  
Limoniidae  
Family: Limoniidae  
BIN URI: BOLD: AAF9040

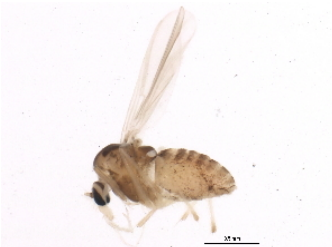

**BIOUG01403-C01 [Lateral]**  
Tanypodinae  
Family: Chironomidae  
BIN URI: BOLD: ABV0256

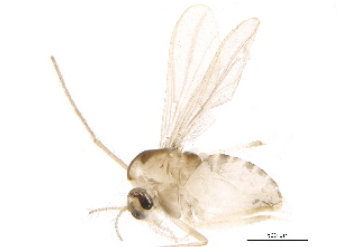

**BIOUG22719-H02 [Lateral]**  
Chironomidae  
Family: Chironomidae  
BIN URI: BOLD: AAO7630

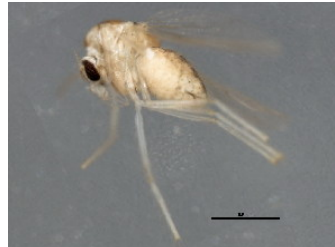

**10BBCDIP-1014 [Lateral]**  
Chironomidae  
Family: Chironomidae  
BIN URI: BOLD: ACM1999

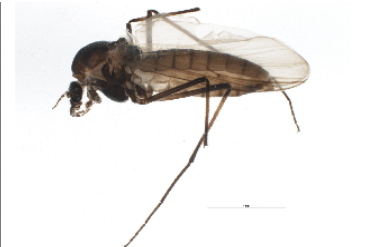

**BIOUG05519-H04 [Lateral]**  
Pagastia orthogonia  
Family: Chironomidae  
BIN URI: BOLD: AAI2601

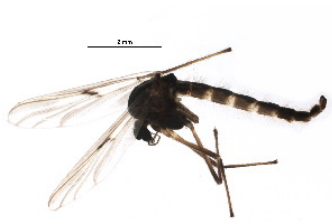

**BIOUG22289-F05 [Lateral]**  
Chironomidae  
Family: Chironomidae  
BIN URI: BOLD: ACV5706

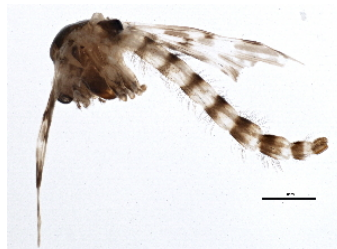

**BIOUG05644-A07 [Lateral]**  
Psectrotanypus sp. ES01  
Family: Chironomidae  
BIN URI: BOLD: AAG0314

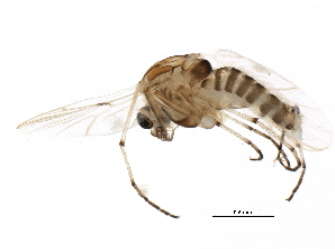

**BIOUG22084-H03 [Lateral]**  
Procladius  
Family: Chironomidae  
BIN URI: BOLD: AAL7370

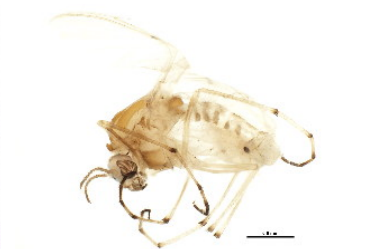

**BIOUG01700-E06 [Lateral]**  
Chironomidae  
Family: Chironomidae  
BIN URI: BOLD: ABV9319

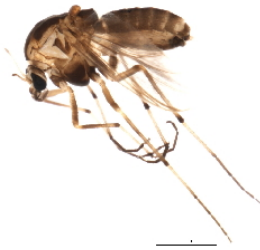

**10BBDIP-1373 [Frontal]**  
 Chironomidae  
 Family: Chironomidae  
 BIN URI: BOLD:AAG3918

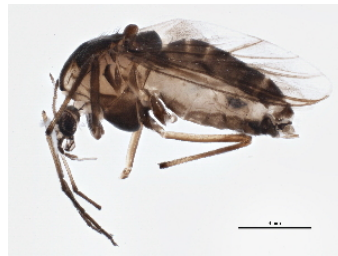

**BIOUG05522-E05 [Lateral]**  
 Procladius  
 Family: Chironomidae  
 BIN URI: BOLD:AAM6227

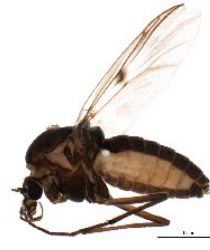

**BIOUG01459-B05 [Lateral]**  
 Chironomidae  
 Family: Chironomidae  
 BIN URI: BOLD:AAP3007

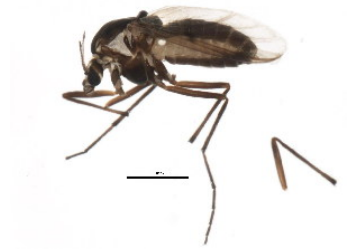

**BIOUG01344-E09 [Lateral]**  
 Procladius  
 Family: Chironomidae  
 BIN URI: BOLD:AAQ0606

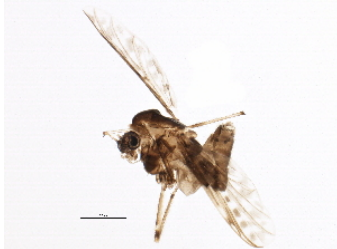

**BIOUG20653-B02 [Lateral]**  
 Diptera  
 BIN URI: BOLD:ACU4727

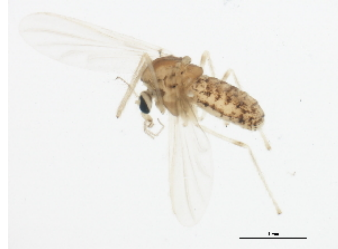

**BIOUG01403-G08 [Lateral]**  
 Chironomidae  
 Family: Chironomidae  
 BIN URI: BOLD:ACJ6513

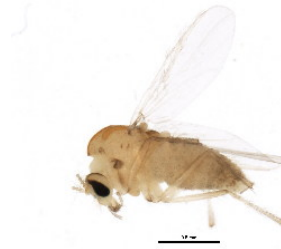

**BIOUG01337-A06 [Lateral]**  
 Monopelopia tenuicalcar  
 Family: Chironomidae  
 BIN URI: BOLD:AAM6277

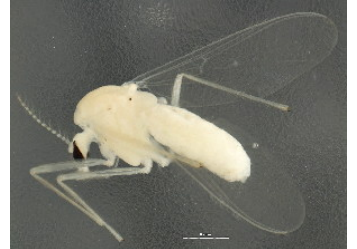

**10JSROW-0880 [Lateral]**  
 Krenopelopia  
 Family: Chironomidae  
 BIN URI: BOLD:AAC9199

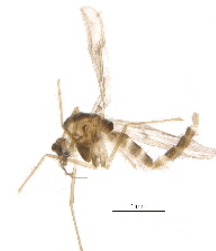

**BIOUG21767-C06 [Lateral]**  
 Chironomidae  
 Family: Chironomidae  
 BIN URI: BOLD:AAN5326

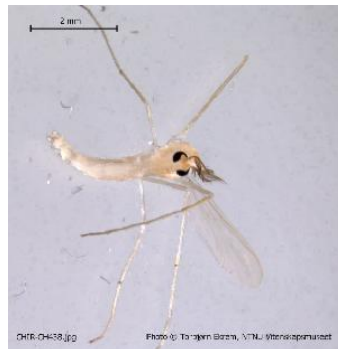

**CHIR\_CH438 [Ventral]**  
 Conchapelopia telema  
 Family: Chironomidae  
 BIN URI: BOLD:AAC4802

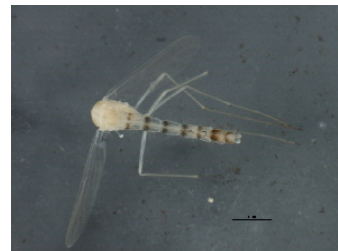

**10JSROW-0447 [Dorsal]**  
 Conchapelopia telema  
 Family: Chironomidae  
 BIN URI: BOLD:AAN5351

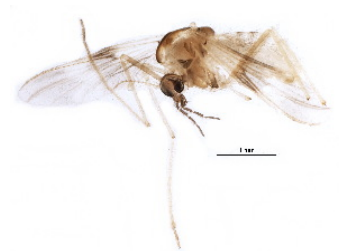

**BIOUG21773-C02 [Lateral]**  
 Chironomidae  
 Family: Chironomidae  
 BIN URI: BOLD:AAM6281

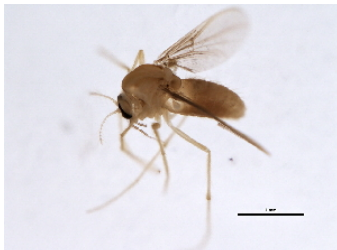

**08TTML-1497 [Lateral]**  
 Chironomidae  
 Family: Chironomidae  
 BIN URI: BOLD:AAN5335

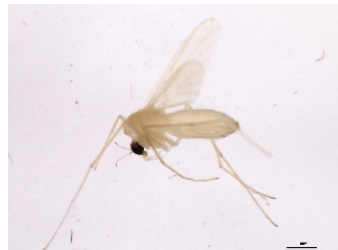

**09BBDIP-1839 [Lateral]**  
 Chironomidae  
 Family: Chironomidae  
 BIN URI: BOLD:AAG5468

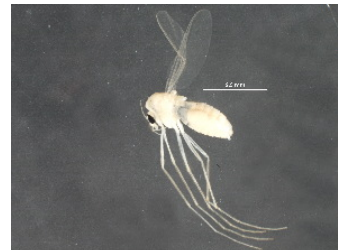

**BIOUG22875-D09 [Lateral]**  
 Chironomidae  
 Family: Chironomidae  
 BIN URI: BOLD:ACV4670

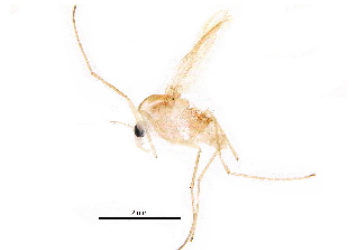

**BIOUG22930-C09 [Lateral]**  
 Tanypodinae  
 Family: Chironomidae  
 BIN URI: BOLD:AAP6883

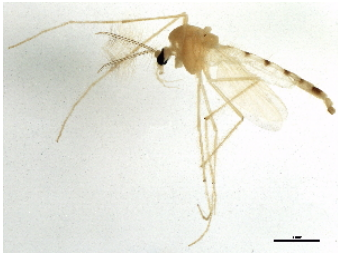

**BIOUG01544-D11 [Lateral]**  
Tanypodinae  
Family: Chironomidae  
BIN URI: BOLD:ABW4240

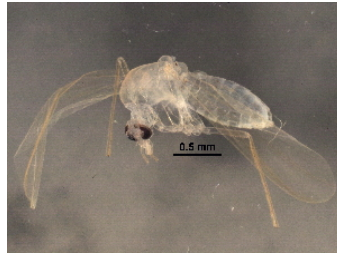

**BIOUG16069-G08 [Lateral]**  
Tanypodinae  
Family: Chironomidae  
BIN URI: BOLD:ACP8795

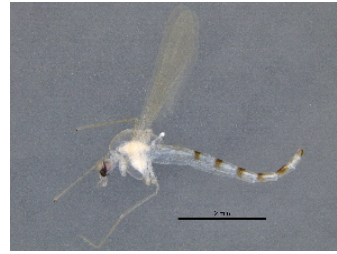

**BIOUG22468-C11 [Lateral]**  
Chironomidae  
Family: Chironomidae  
BIN URI: BOLD:ACV5536

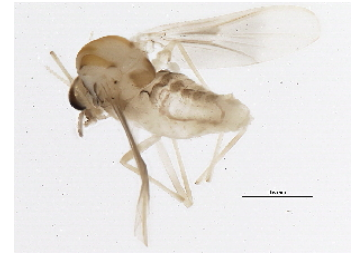

**10BBDIP-0579 [Lateral]**  
Chironomidae  
Family: Chironomidae  
BIN URI: BOLD:AAG5531

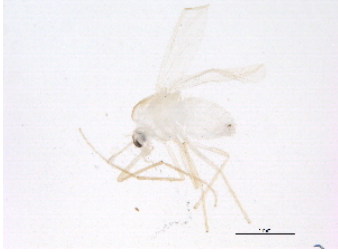

**BIOUG03752-G10 [Lateral]**  
Chironomidae  
Family: Chironomidae  
BIN URI: BOLD:ACC7559

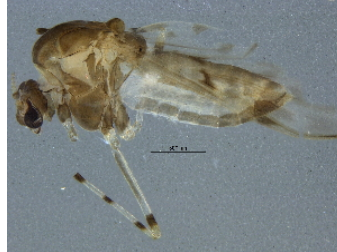

**BIOUG08639-B03 [Lateral]**  
Ablabesmyia  
Family: Chironomidae  
BIN URI: BOLD:ACH2330

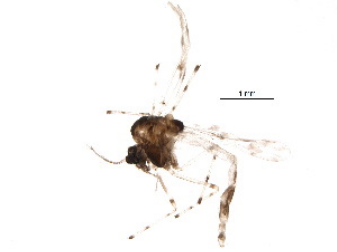

**BIOUG21180-F10 [Lateral]**  
Diptera  
BIN URI: BOLD:ACW0823

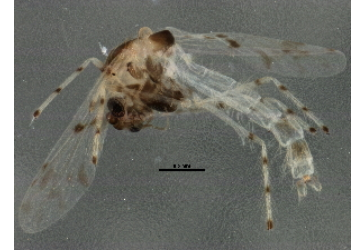

**BIOUG03910-A04 [Lateral]**  
Chironomidae  
Family: Chironomidae  
BIN URI: BOLD:AAW7576

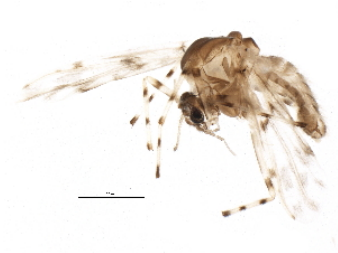

**BIOUG20653-H08 [Lateral]**  
Diptera  
BIN URI: BOLD:AAC8567

**IMAGE NOT AVAILABLE**

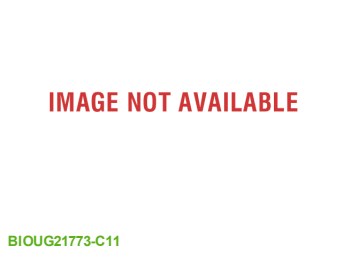

**BIOUG21773-C11**  
Ablabesmyia  
Family: Chironomidae

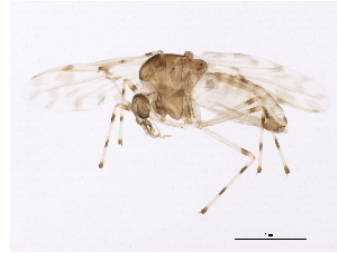

**BIOUG01675-H04 [Lateral]**  
Chironomidae  
Family: Chironomidae  
BIN URI: BOLD:AAP3003

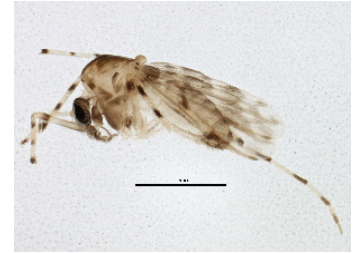

**BIOUG03907-D07 [Lateral]**  
Chironomidae  
Family: Chironomidae  
BIN URI: BOLD:ACC7822

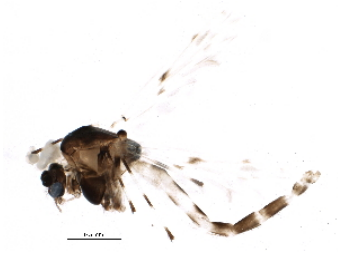

**BIOUG22084-B12 [Lateral]**  
Chironomidae  
Family: Chironomidae  
BIN URI: BOLD:AAP5113

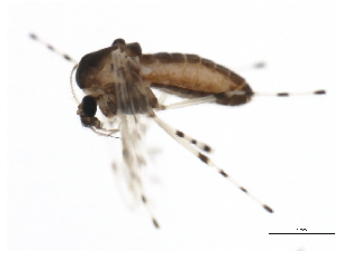

**10BBCDIP-1078 [Lateral]**  
Tanypodinae  
Family: Chironomidae  
BIN URI: BOLD:AAP8999

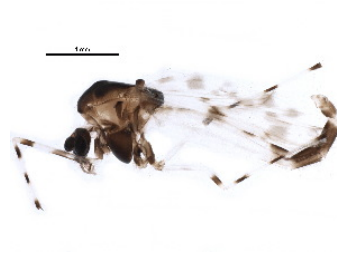

**BIOUG22467-A01 [Lateral]**  
Ablabesmyia  
Family: Chironomidae  
BIN URI: BOLD:ABV1232

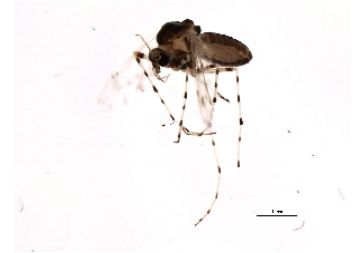

**09BBDIP-1868 [Lateral]**  
Chironomidae  
Family: Chironomidae  
BIN URI: BOLD:AAM6234

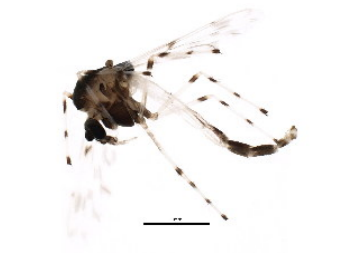

**BIOUG01352-C09 [Lateral]**  
Chironomidae  
Family: Chironomidae  
BIN URI: BOLD:ABW7322

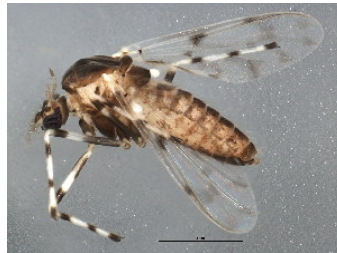

**10JSROW-0876 [Lateral]**  
Chironomidae  
Family: Chironomidae  
BIN URI: BOLD:AAM6293

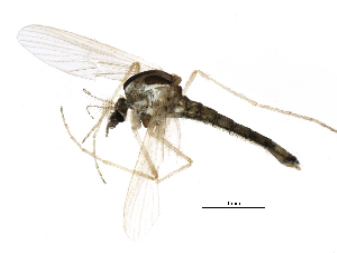

**BIOUG21589-B12 [Lateral]**  
Chaoboridae  
Family: Chaoboridae  
BIN URI: BOLD:AAG5471

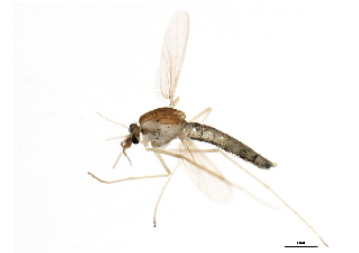

**08TTML-1111 [Lateral]**  
Chaoboridae  
Family: Chaoboridae  
BIN URI: BOLD:AAM6295

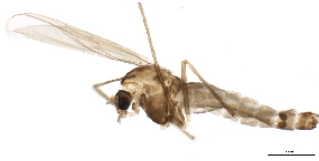

**BIOUG01490-C08 [Lateral]**  
Chironomidae  
Family: Chironomidae  
BIN URI: BOLD:ABA0774

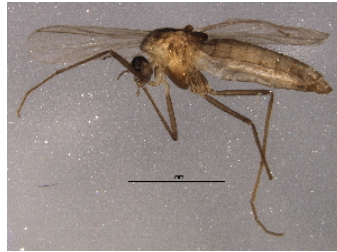

**BIOUG10176-F06 [Lateral]**  
Chironomidae  
Family: Chironomidae  
BIN URI: BOLD:ACK4095

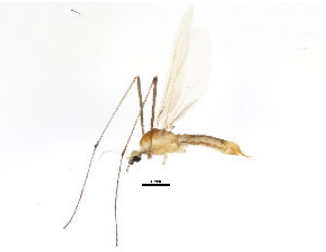

**BIOUG00855-C07 [Lateral]**  
Limoniidae  
Family: Limoniidae  
BIN URI: BOLD:AAZ5967

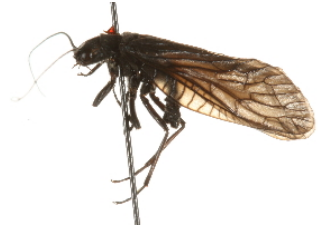

**09BCAD-139 [Lateral]**  
Sialis BIO6  
Family: Sialidae  
BIN URI: BOLD:AAG9766

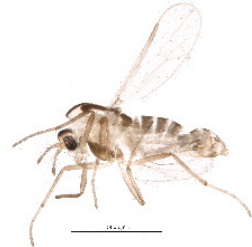

**BIOUG20609-H07 [Lateral]**  
Diptera  
BIN URI: BOLD:ACU1761

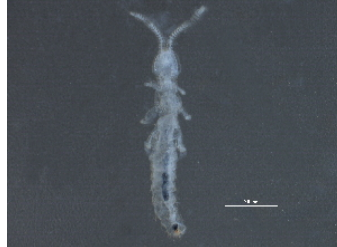

**BIOUG14144-C11 [Dorsal]**  
Campodeidae  
Family: Campodeidae  
BIN URI: BOLD:ACP3162

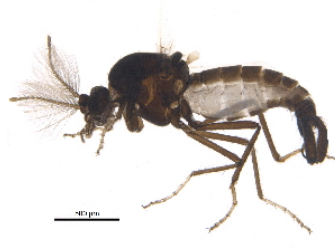

**BIOUG22842-E07 [Lateral]**  
Ceratopogon  
Family: Ceratopogonidae  
BIN URI: BOLD:ACV9101

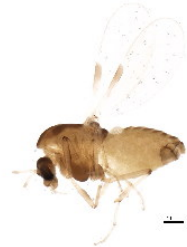

**BIOUG01924-E10 [Lateral]**  
Chironomidae  
Family: Chironomidae  
BIN URI: BOLD:ABY2015

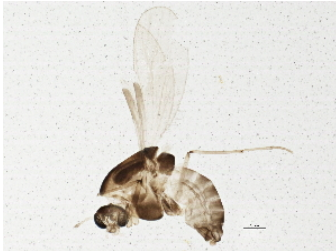

**BIOUG05597-F04 [Lateral]**  
Corynoneura  
Family: Chironomidae  
BIN URI: BOLD:AAG0994

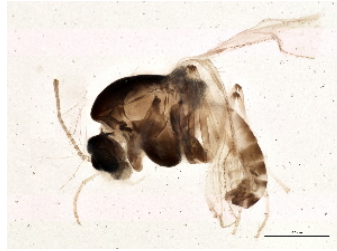

**BIOUG05714-G07 [Lateral]**  
Corynoneura  
Family: Chironomidae  
BIN URI: BOLD:ACF9451

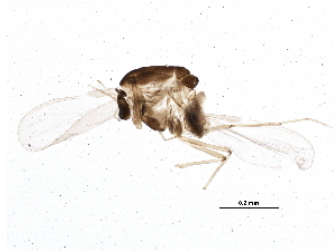

**BIOUG09240-G02 [Lateral]**  
Orthocladiinae  
Family: Chironomidae  
BIN URI: BOLD:ACK8001

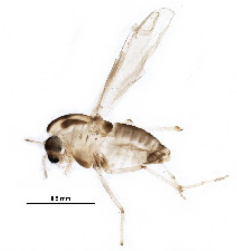

**BIOUG22417-C05 [Lateral]**  
Corynoneura scutellata  
Family: Chironomidae  
BIN URI: BOLD:AAN5330

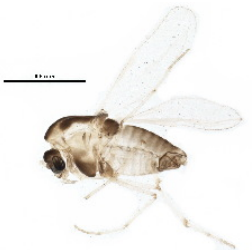

**BIOUG22466-E02 [Lateral]**  
Corynoneura  
Family: Chironomidae  
BIN URI: BOLD:ABY3407

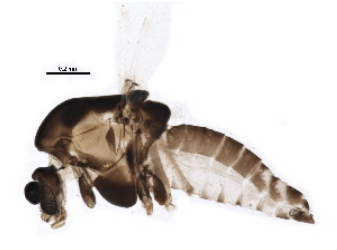

**BIOUG21778-E01 [Lateral]**  
Chironomidae  
Family: Chironomidae  
BIN URI: BOLD:ACV2298

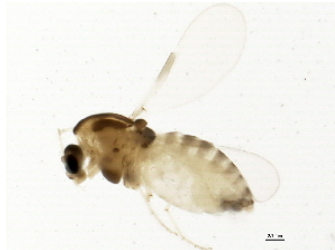

**10BBDIP-2156 [Lateral]**  
Chironomidae  
Family: Chironomidae  
BIN URI: BOLD:AAO7623

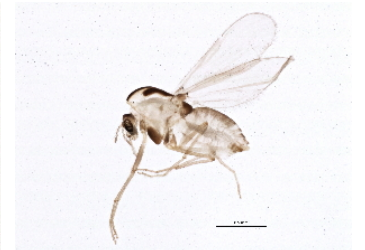

**BIOUG05517-D05 [Lateral]**  
Thienemanniella xena  
Family: Chironomidae  
BIN URI: BOLD:AAD5254

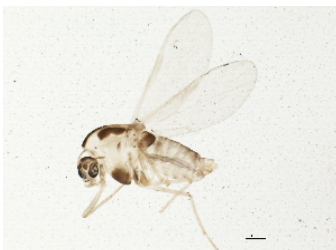

**BIOUG05573-F10 [Lateral]**  
Chironomidae  
Family: Chironomidae  
BIN URI: BOLD:ACF7512

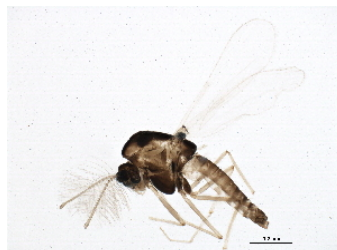

**BIOUG10507-B03 [Lateral]**  
Thienemanniella  
Family: Chironomidae  
BIN URI: BOLD:AAD5253

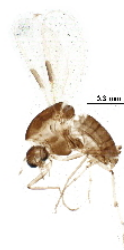

**BIOUG12683-B04 [Lateral]**  
Chironomidae  
Family: Chironomidae  
BIN URI: BOLD:ACN5657

**IMAGE NOT AVAILABLE**

**BIOUG22716-C12**  
Corynoneura  
Family: Chironomidae



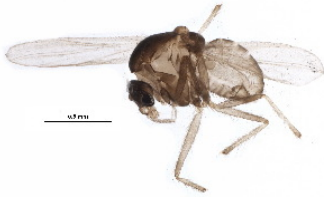

**BIOUG22577-E09 [Lateral]**  
Nilotanypus fimbriatus  
Family: Chironomidae  
BIN URI: BOLD:AAE5762

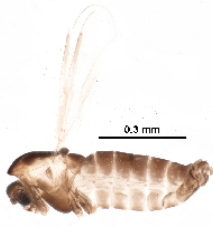

**BIOUG02927-E05 [Lateral]**  
Chironomidae  
Family: Chironomidae  
BIN URI: BOLD:ACP2501

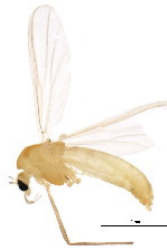

**BIOUG01345-D03 [Lateral]**  
Bryophaenocladus ictericus  
Family: Chironomidae  
BIN URI: BOLD:AAM6273

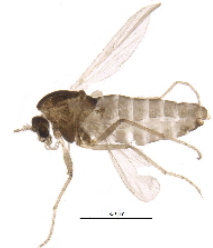

**BIOUG22329-H03 [Lateral]**  
Chironomidae  
Family: Chironomidae  
BIN URI: BOLD:AAQ0599

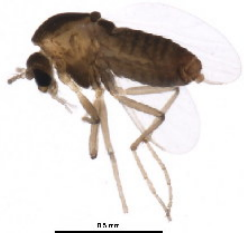

**BIOUG01360-A10 [Lateral]**  
Chironomidae  
Family: Chironomidae  
BIN URI: BOLD:ABW5473

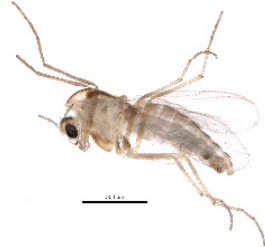

**BIOUG22351-H07 [Lateral]**  
Limnophyes natalensis  
Family: Chironomidae  
BIN URI: BOLD:AAB7361

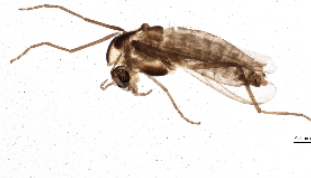

**BIOUG02979-C04 [Lateral]**  
Limnophyes  
Family: Chironomidae  
BIN URI: BOLD:ABU5525

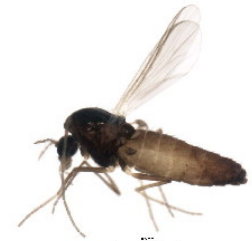

**BIOUG00942-G04 [Lateral]**  
Limnophyes  
Family: Chironomidae  
BIN URI: BOLD:AAW5339

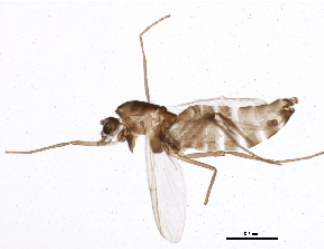

**BIOUG01440-B08 [Lateral]**  
Chironomidae  
Family: Chironomidae  
BIN URI: BOLD:ABV0255

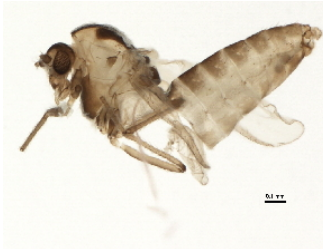

**BIOUG01302-A08 [Lateral]**  
Chironomidae  
Family: Chironomidae  
BIN URI: BOLD:AAU6603

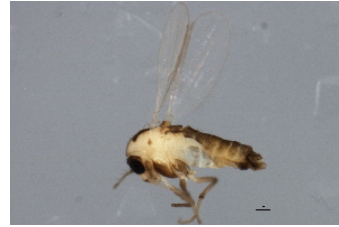

**08TTML-1034 [Lateral]**  
Chironomidae  
Family: Chironomidae  
BIN URI: BOLD:AAW5336

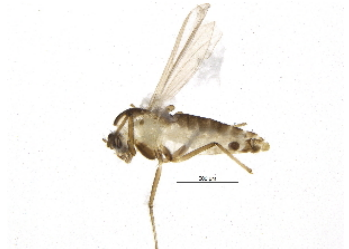

**BIOUG02917-D08 [Lateral]**  
Chironomidae  
Family: Chironomidae  
BIN URI: BOLD:AAO7619

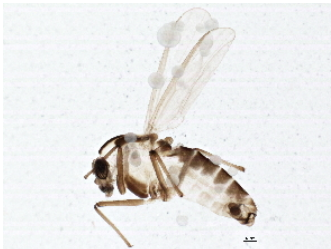

**BIOUG02927-D01 [Lateral]**  
Chironomidae  
Family: Chironomidae  
BIN URI: BOLD:ACA4980

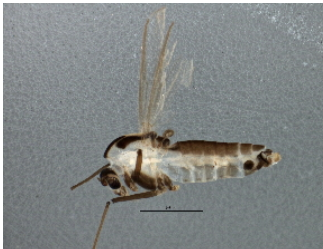

**BIOUG04540-C01 [Lateral]**  
Chironomidae  
Family: Chironomidae  
BIN URI: BOLD:ACA5153

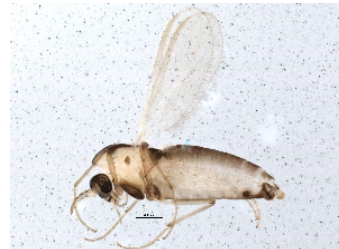

**BIOUG09969-B02 [Lateral]**  
Orthocladinae  
Family: Chironomidae  
BIN URI: BOLD:ACG2963

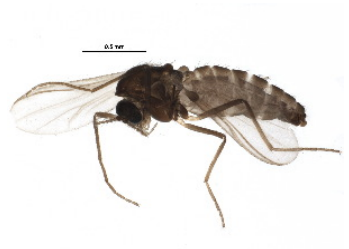

**BIOUG22293-A11 [Lateral]**  
Limnophyes  
Family: Chironomidae  
BIN URI: BOLD:AAG5542

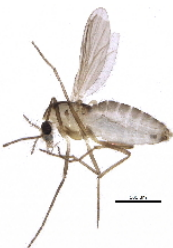

**BIOUG10233-B01 [Lateral]**  
Limnophyes  
Family: Chironomidae  
BIN URI: BOLD:ACL7003

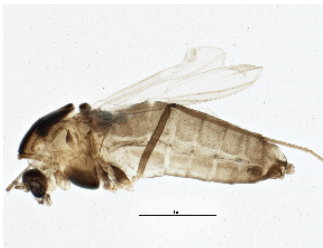

**BIOUG05631-G04 [Lateral]**  
Chironomidae  
Family: Chironomidae  
BIN URI: BOLD:ACE0699

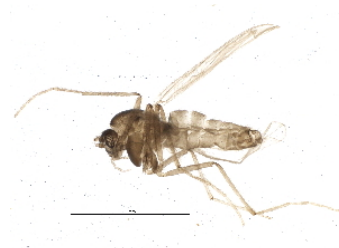

**BIOUG09472-D08 [Lateral]**  
Chironomidae  
Family: Chironomidae  
BIN URI: BOLD:ACK8285

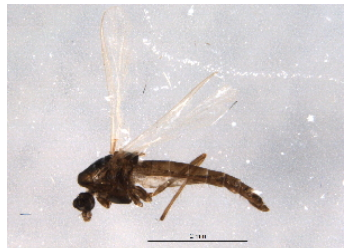

**BIOUG07129-B09 [Lateral]**  
Metrocnemus  
Family: Chironomidae  
BIN URI: BOLD:ACM6798

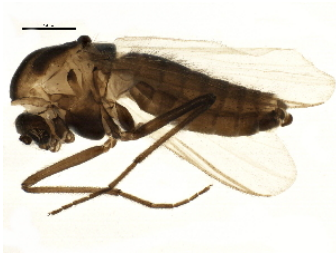

**BIOUG13104-B01 [Lateral]**  
 Metriocnemus  
 Family: Chironomidae  
 BIN URI: BOLD:ABA6408

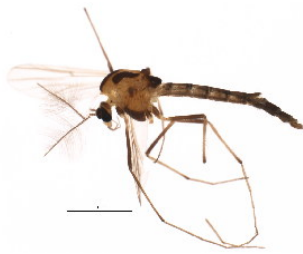

**BIOUG01426-G06 [Lateral]**  
 Orthoclaadiinae  
 Family: Chironomidae  
 BIN URI: BOLD:ABV0257

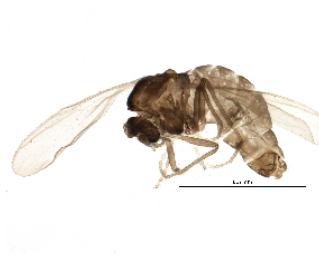

**BIOUG21590-H09 [Lateral]**  
 Orthoclaadiinae  
 Family: Chironomidae  
 BIN URI: BOLD:ABA1222

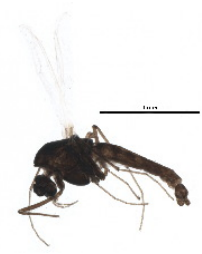

**BIOUG22292-G10 [Lateral]**  
 Chironomidae  
 Family: Chironomidae  
 BIN URI: BOLD:AAP3767

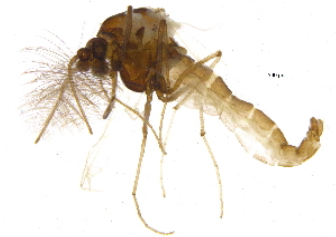

**BIOUG01801-F04 [Lateral]**  
 Chironomidae  
 Family: Chironomidae  
 BIN URI: BOLD:ACP6694

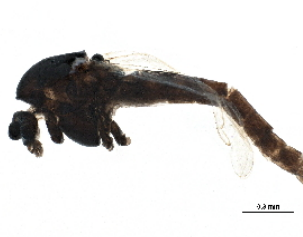

**BIOUG21946-F01 [Lateral]**  
 Orthoclaadiinae  
 Family: Chironomidae  
 BIN URI: BOLD:ACU4327

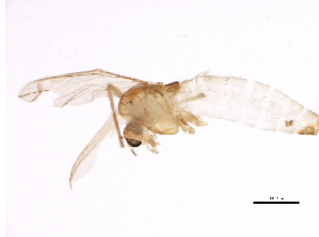

**BIOUG01444-G10 [Lateral]**  
 Chironomidae  
 Family: Chironomidae  
 BIN URI: BOLD:ABV0261

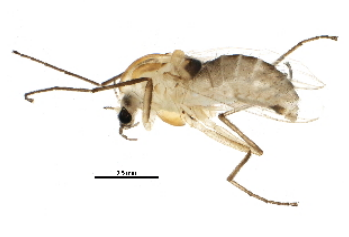

**BIOUG22716-A11 [Lateral]**  
 Psectrocladius obvius  
 Family: Chironomidae  
 BIN URI: BOLD:AAF6432

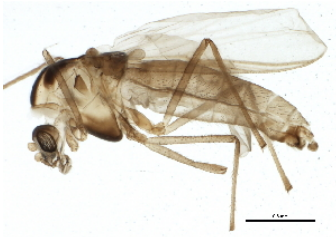

**BIOUG01437-H08 [Lateral]**  
 Chironomidae  
 Family: Chironomidae  
 BIN URI: BOLD:AAU6612

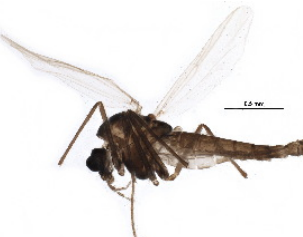

**BIOUG21778-F01 [Lateral]**  
 Orthoclaadiinae  
 Family: Chironomidae  
 BIN URI: BOLD:ACF7017

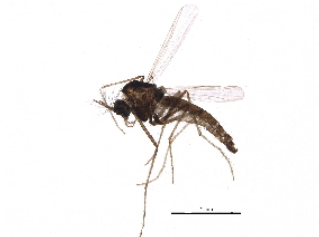

**BIOUG07960-F03 [Lateral]**  
 Orthoclaadiinae  
 Family: Chironomidae  
 BIN URI: BOLD:AC19992

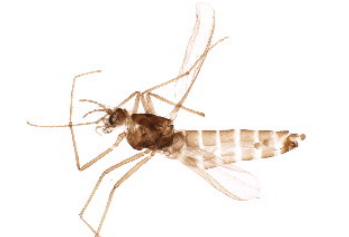

**BIOUG01774-F03 [Lateral]**  
 Chironomidae  
 Family: Chironomidae  
 BIN URI: BOLD:ABA6501

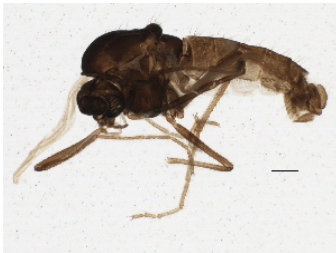

**BIOUG02750-C02 [Lateral]**  
 Orthoclaadiinae  
 Family: Chironomidae  
 BIN URI: BOLD:AAV5942

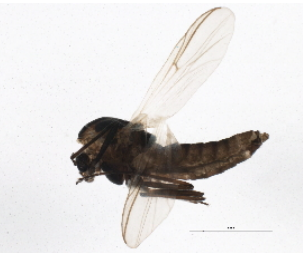

**BIOUG05563-D12 [Lateral]**  
 Chironomidae  
 Family: Chironomidae  
 BIN URI: BOLD:ABV1186

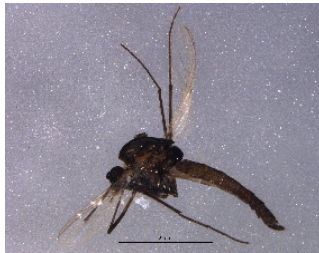

**BIOUG11202-D07 [Lateral]**  
 Rheocricotopus  
 Family: Chironomidae  
 BIN URI: BOLD:ACM1766

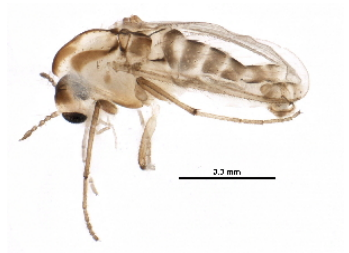

**BIOUG22460-C10 [Lateral]**  
 Chironomidae  
 Family: Chironomidae  
 BIN URI: BOLD:ACV2911

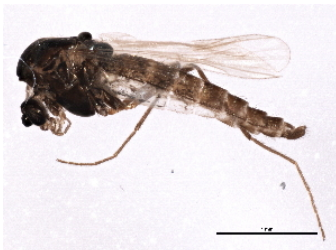

**BIOUG05514-B03 [Lateral]**  
 Cricotopus tremulus  
 Family: Chironomidae  
 BIN URI: BOLD:AAE4299

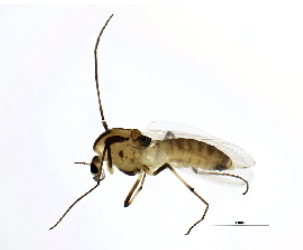

**08BBDIP-2663 [Lateral]**  
 Cricotopus  
 Family: Chironomidae  
 BIN URI: BOLD:ACH0948

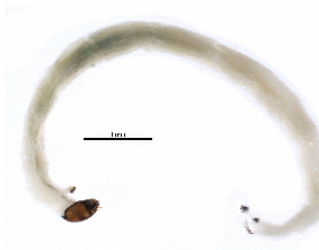

**BIOUG24006-F08 [Larva]**  
 Chironomidae  
 Family: Chironomidae

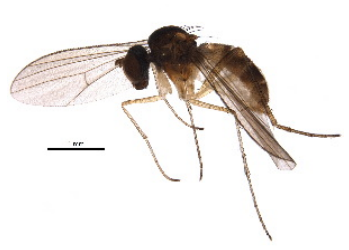

**BIOUG22357-H07 [Lateral]**  
 Chironomidae  
 Family: Chironomidae  
 BIN URI: BOLD:AAM6289

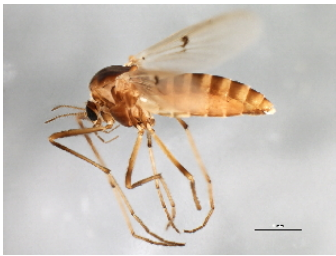

**08TTML-1577 [Lateral]**  
Chironomidae  
Family: Chironomidae  
BIN URI: BOLD:AAP2998

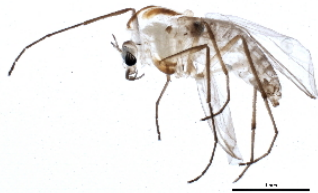

**BIOUG05546-A02 [Lateral]**  
Psectrocladius  
Family: Chironomidae  
BIN URI: BOLD:AAL7382

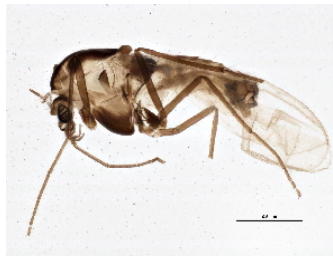

**BIOUG05517-B10 [Lateral]**  
Chironomidae  
Family: Chironomidae  
BIN URI: BOLD:ABA6503

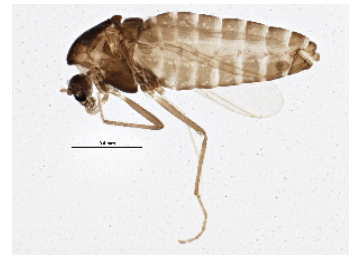

**BIOUG02822-B05 [Lateral]**  
Chironomidae  
Family: Chironomidae  
BIN URI: BOLD:ABA1226

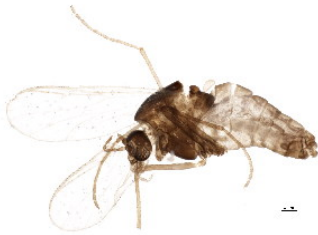

**BIOUG00897-D09 [Lateral]**  
Chironomidae  
Family: Chironomidae  
BIN URI: BOLD:ABX0273

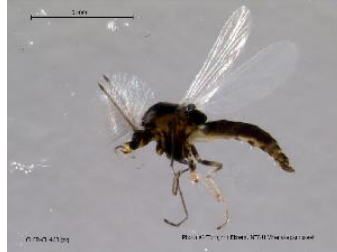

**CHIR\_CH463 [Lateral]**  
Nanocladius anderseni  
Family: Chironomidae  
BIN URI: BOLD:ACW4831

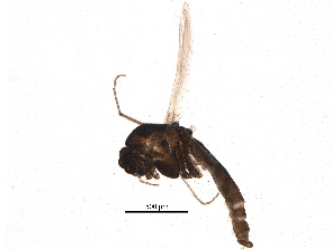

**BIOUG16044-D10 [Lateral]**  
Metriocnemus  
Family: Chironomidae  
BIN URI: BOLD:ACP7395

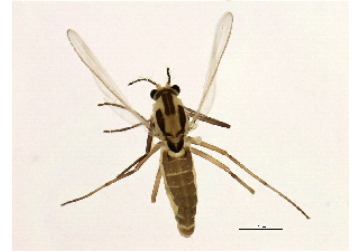

**HLC-26992 [Dorsal]**  
Paraphaenocladus impensus  
Family: Chironomidae  
BIN URI: BOLD:AAC4197

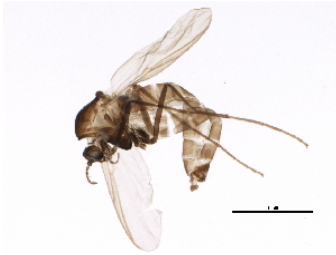

**BIOUG01440-H05 [Lateral]**  
Bryophaenocladus sp. 8ES  
Family: Chironomidae  
BIN URI: BOLD:AAG1021

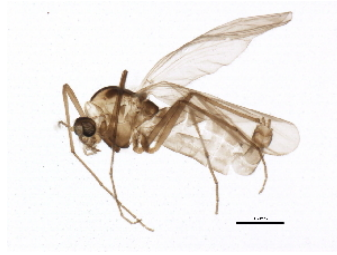

**BIOUG01660-G08 [Lateral]**  
Chironomidae  
Family: Chironomidae  
BIN URI: BOLD:ABA6465

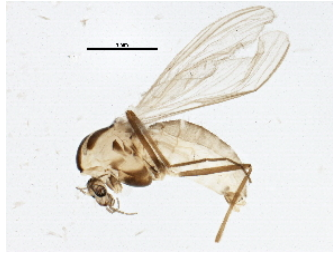

**BIOUG05618-D07 [Lateral]**  
Heterotrissocladius  
Family: Chironomidae  
BIN URI: BOLD:AAN5369

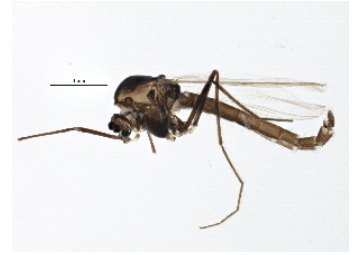

**BIOUG05506-C04 [Lateral]**  
Chironomidae  
Family: Chironomidae  
BIN URI: BOLD:ACA2954

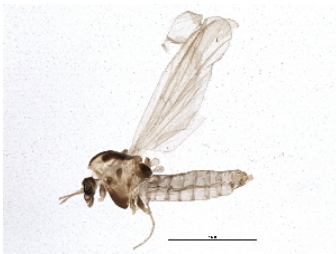

**BIOUG05572-G07 [Lateral]**  
Chironomidae  
Family: Chironomidae  
BIN URI: BOLD:ACF6271

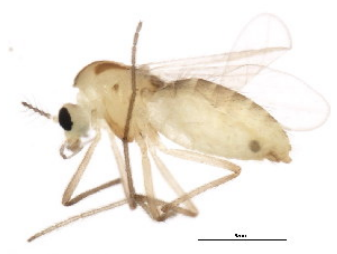

**BIOUG00942-C01 [Lateral]**  
Chironomidae  
Family: Chironomidae  
BIN URI: BOLD:AAG5518

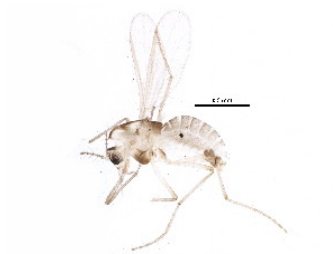

**BIOUG21892-E10 [Lateral]**  
Chironomidae  
Family: Chironomidae  
BIN URI: BOLD:AAM6276

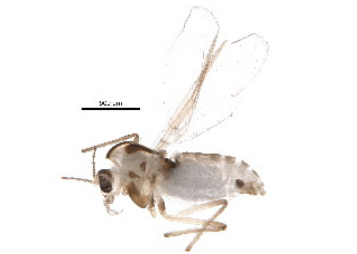

**BIOUG20857-C02 [Lateral]**  
Diptera  
BIN URI: BOLD:ACU5088

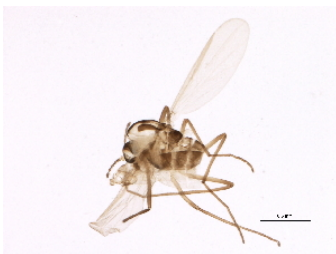

**BIOUG01670-F09 [Lateral]**  
Chironomidae  
Family: Chironomidae  
BIN URI: BOLD:ACU7906

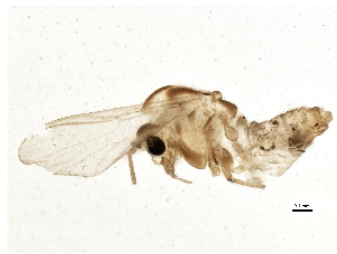

**BIOUG07577-C12 [Lateral]**  
Chironomidae  
Family: Chironomidae  
BIN URI: BOLD:ACI7237

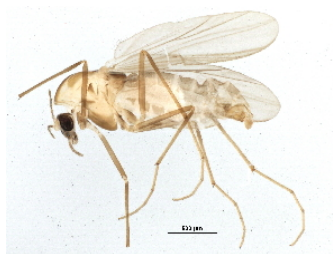

**BIOUG05830-G09 [Lateral]**  
Orthocladinae  
Family: Chironomidae  
BIN URI: BOLD:ACN1964

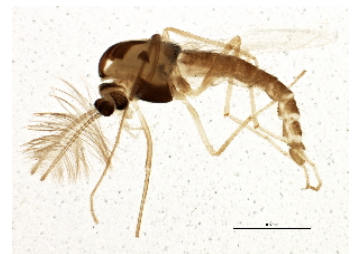

**BIOUG01648-H11 [Lateral]**  
Chironomidae  
Family: Chironomidae  
BIN URI: BOLD:ABV1206

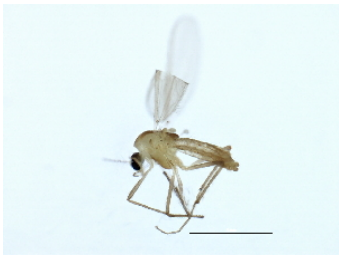

**09BBEDI-2560 [Lateral]**  
Chironomidae  
Family: Chironomidae  
BIN URI: BOLD:AAM6270

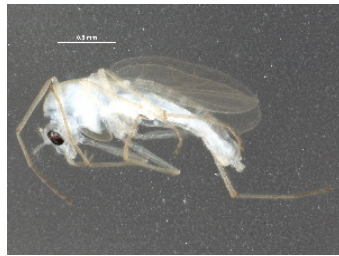

**BIOUG22288-A04 [Lateral]**  
Chironomidae  
Family: Chironomidae  
BIN URI: BOLD:ACV4067

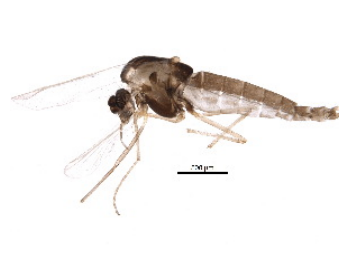

**BIOUG22352-D06 [Lateral]**  
Paraphaenocladus  
Family: Chironomidae  
BIN URI: BOLD:AAV5888

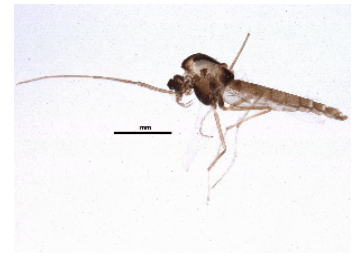

**BIOUG09359-B08 [Lateral]**  
Paraphaenocladus  
Family: Chironomidae  
BIN URI: BOLD:ACL0119

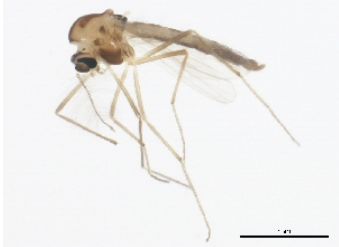

**BIOUG01403-D08 [Lateral]**  
Chironomidae  
Family: Chironomidae  
BIN URI: BOLD:AAI2688

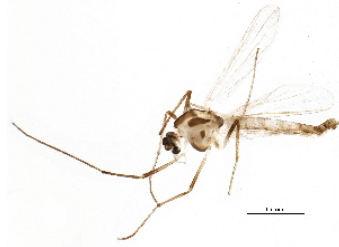

**BIOUG13341-E05 [Lateral]**  
Parametricnemus  
Family: Chironomidae  
BIN URI: BOLD:AAI2689

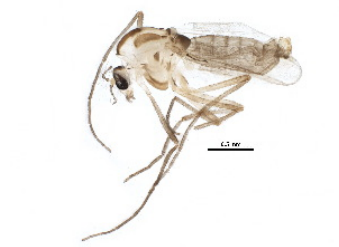

**BIOUG22291-C11 [Lateral]**  
Parametricnemus  
Family: Chironomidae  
BIN URI: BOLD:AAN5348

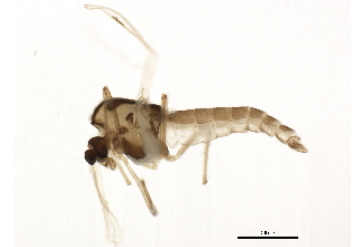

**BIOUG01302-G07 [Lateral]**  
Chironomidae  
Family: Chironomidae  
BIN URI: BOLD:AAZ5599

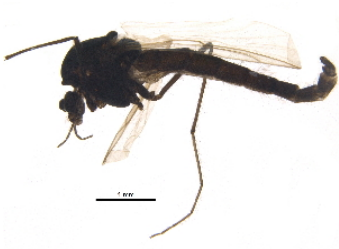

**BIOUG21483-B02 [Lateral]**  
Chironomidae  
Family: Chironomidae  
BIN URI: BOLD:ACA4749

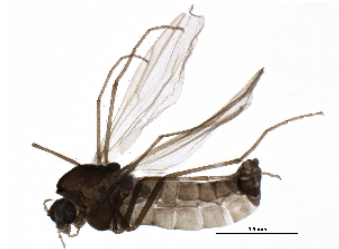

**BIOUG22162-A05 [Lateral]**  
Chironomidae  
Family: Chironomidae  
BIN URI: BOLD:ACV2557

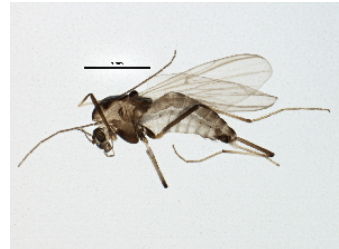

**BIOUG05506-B08 [Lateral]**  
Cricotopus  
Family: Chironomidae  
BIN URI: BOLD:AAP5921

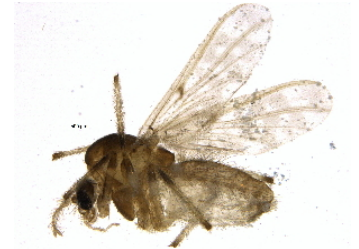

**BIOUG03802-C02 [Lateral]**  
Chironomidae  
Family: Chironomidae  
BIN URI: BOLD:AAN5352

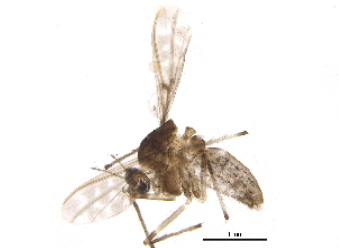

**BIOUG23314-D03 [Lateral]**  
Chironomidae  
Family: Chironomidae  
BIN URI: BOLD:ACW1301

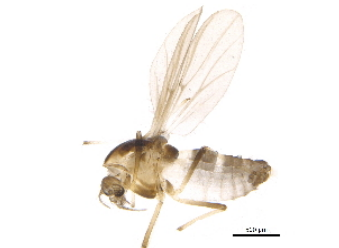

**BIOUG22234-C11 [Lateral]**  
Cricotopus vierriensis  
Family: Chironomidae  
BIN URI: BOLD:ACV5403

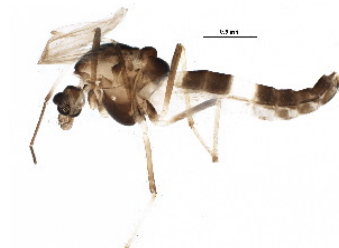

**BIOUG21778-B07 [Lateral]**  
Cricotopus vierriensis  
Family: Chironomidae  
BIN URI: BOLD:ACV5404

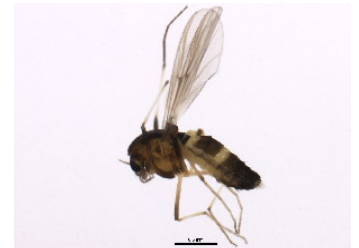

**BIOUG00860-C06 [Lateral]**  
Cricotopus vierriensis  
Family: Chironomidae  
BIN URI: BOLD:AAG1005

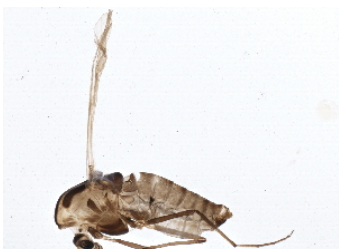

**BIOUG13107-E10 [Lateral]**  
Eukiefferiella  
Family: Chironomidae  
BIN URI: BOLD:ABV1192

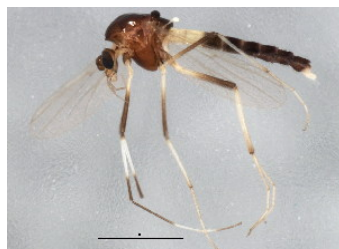

**BIOUG01406-H11 [Lateral]**  
Chironomidae  
Family: Chironomidae  
BIN URI: BOLD:AAG1002

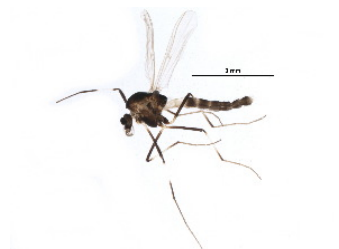

**BIOUG21773-C06 [Lateral]**  
Cricotopus  
Family: Chironomidae  
BIN URI: BOLD:ABY9141

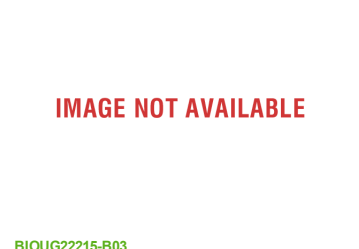

**IMAGE NOT AVAILABLE**

**BIOUG22215-B03**  
Cricotopus annulator cplx  
Family: Chironomidae

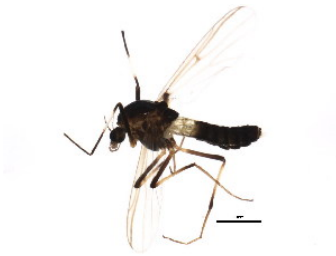

**BIOUG00965-F08 [Lateral]**  
Cricotopus  
Family: Chironomidae  
BIN URI: BOLD:ABA4431

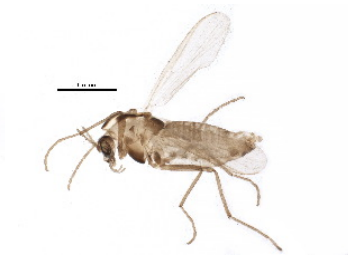

**BIOUG21770-C03 [Lateral]**  
Gymnometrioctenemus  
Family: Chironomidae  
BIN URI: BOLD:AAI1981

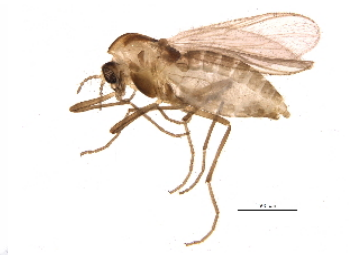

**BIOUG09869-B11 [Lateral]**  
Gymnometrioctenemus brumalis  
Family: Chironomidae  
BIN URI: BOLD:AAP6873

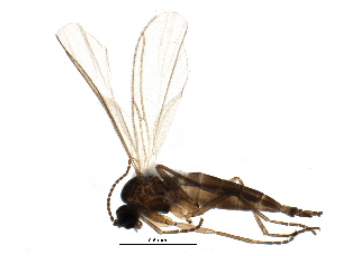

**BIOUG22327-D03 [Lateral]**  
Sciaridae  
Family: Sciaridae

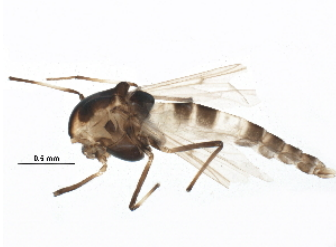

**BIOUG12202-G03 [Lateral]**  
Cricotopus trifascia  
Family: Chironomidae  
BIN URI: BOLD:ACS9429

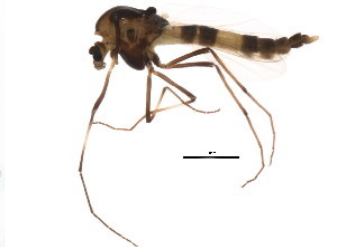

**BIOUG01402-B03 [Lateral]**  
Chironomidae  
Family: Chironomidae  
BIN URI: BOLD:ACT0257

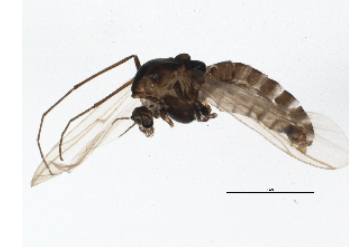

**BIOUG05512-E08 [Lateral]**  
Cricotopus tremulus  
Family: Chironomidae  
BIN URI: BOLD:AAE4298

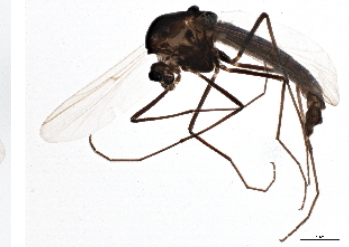

**BIOUG05655-A07 [Lateral]**  
Cricotopus  
Family: Chironomidae  
BIN URI: BOLD:ACF9756

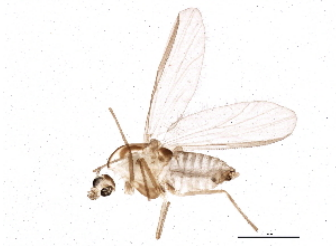

**BIOUG05638-C11 [Lateral]**  
Parakiefferiella  
Family: Chironomidae  
BIN URI: BOLD:ACF7232

IMAGE NOT AVAILABLE

**BIOUG22169-B09**  
Parakiefferiella  
Family: Chironomidae

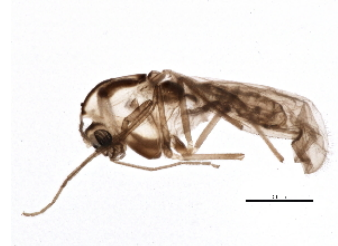

**BIOUG05514-B04 [Lateral]**  
Parakiefferiella  
Family: Chironomidae  
BIN URI: BOLD:AAI2683

IMAGE NOT AVAILABLE

**BIOUG22218-A10**  
Parakiefferiella  
Family: Chironomidae

IMAGE NOT AVAILABLE

IMAGE NOT AVAILABLE

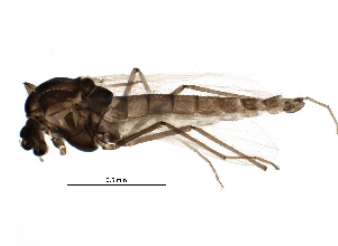

**BIOUG22273-G09 [Lateral]**  
Parakiefferiella  
Family: Chironomidae  
BIN URI: BOLD:AAI2681

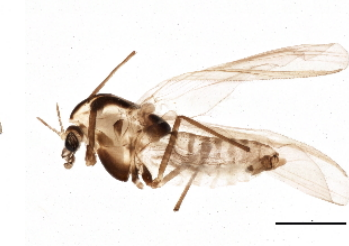

**BIOUG05688-H09 [Lateral]**  
Chironomidae  
Family: Chironomidae  
BIN URI: BOLD:AAQ0604

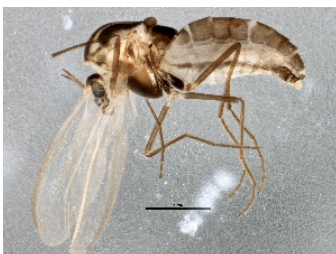

**BIOUG22215-C07**  
Parakiefferiella  
Family: Chironomidae

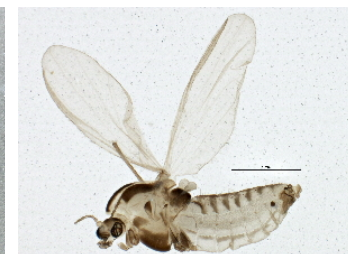

**BIOUG22322-C08**  
Parakiefferiella  
Family: Chironomidae

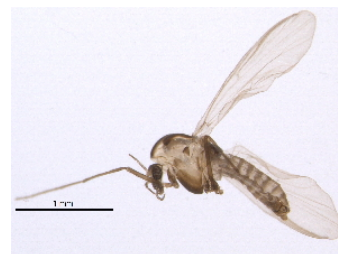

**BIOUG22273-G09 [Lateral]**  
Parakiefferiella  
Family: Chironomidae  
BIN URI: BOLD:AAI2681

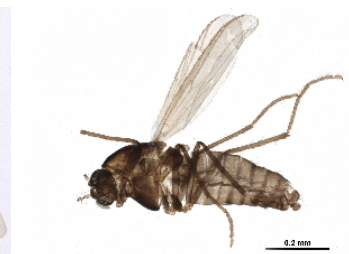

**BIOUG05688-H09 [Lateral]**  
Chironomidae  
Family: Chironomidae  
BIN URI: BOLD:AAQ0604

**BIOUG05686-E03 [Lateral]**

Chironomidae  
Family: Chironomidae  
BIN URI: BOLD:ACF6272

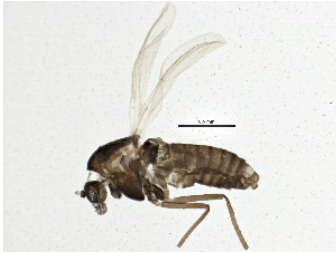

**BIOUG05508-C09 [Lateral]**

Chironomidae  
Family: Chironomidae  
BIN URI: BOLD:ABU5526

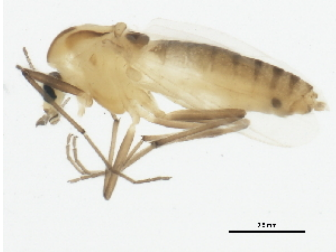

**BIOUG01403-H10 [Lateral]**

Orthocladiinae  
Family: Chironomidae  
BIN URI: BOLD:AA5342

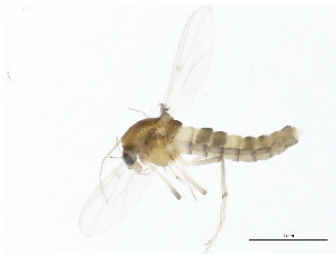

**10BBDIP-0939 [Lateral]**

Chironomidae  
Family: Chironomidae  
BIN URI: BOLD:ABY6869

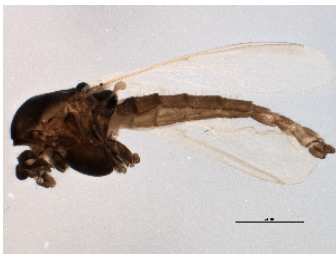

**BIOUG13137-B12 [Lateral]**

Eukiefferiella  
Family: Chironomidae  
BIN URI: BOLD:ABX5317

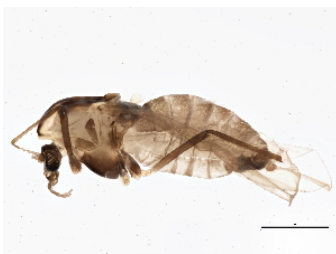

**BIOUG05590-C12 [Lateral]**

Eukiefferiella  
Family: Chironomidae  
BIN URI: BOLD:ACV1438

**BIOUG05589-H02 [Lateral]**

Chironomidae  
Family: Chironomidae  
BIN URI: BOLD:ACF9570

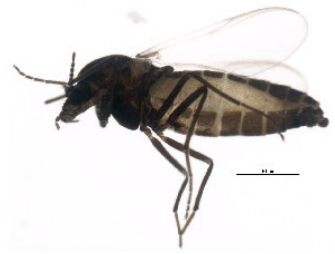

**BIOUG00942-H01 [Lateral]**

Chironomidae  
Family: Chironomidae  
BIN URI: BOLD:AA5341

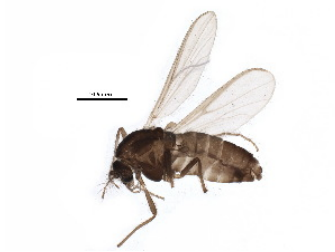

**BIOUG22726-E06 [Lateral]**

Chironomidae  
Family: Chironomidae  
BIN URI: BOLD:ACV5807

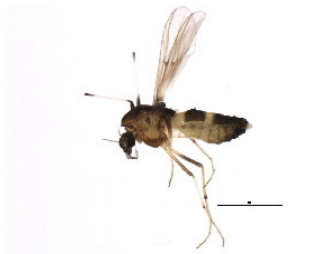

**BIOUG00942-C10 [Lateral]**

Cricotopus sp. 18ES  
Family: Chironomidae  
BIN URI: BOLD:AAG0996

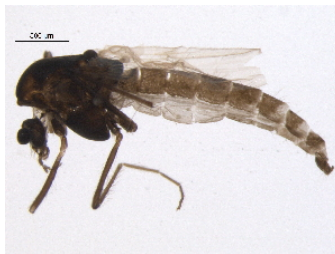

**BIOUG05546-A08 [Lateral]**

Eukiefferiella  
Family: Chironomidae  
BIN URI: BOLD:ACV1437

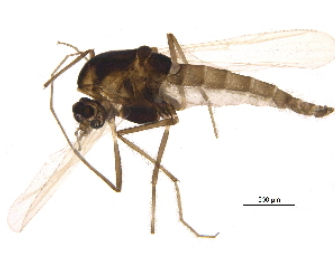

**BIOUG22175-A05 [Lateral]**

Eukiefferiella  
Family: Chironomidae  
BIN URI: BOLD:ACV2786

**BIOUG05514-E03 [Lateral]**

Orthocladiinae  
Family: Chironomidae  
BIN URI: BOLD:ACF8420

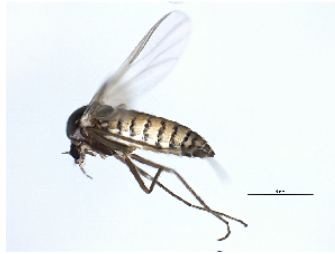

**10JSROW-0382 [Lateral]**

Metricnemos sp. 4ES  
Family: Chironomidae  
BIN URI: BOLD:ABX5809

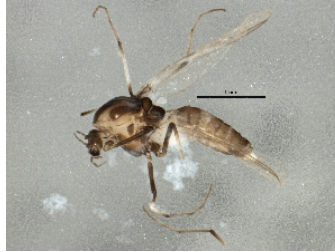

**BIOUG05616-F07 [Lateral]**

Cricotopus sp. 19ES  
Family: Chironomidae  
BIN URI: BOLD:AAP5141

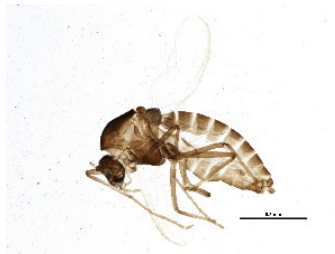

**BIOUG01623-D05 [Lateral]**

Smittia sp. 8ES  
Family: Chironomidae  
BIN URI: BOLD:ACP4736

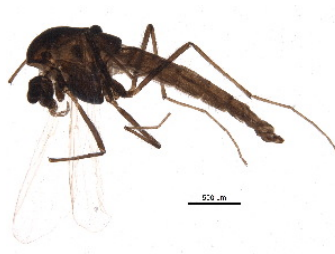

**BIOUG22321-D12 [Lateral]**

Eukiefferiella  
Family: Chironomidae  
BIN URI: BOLD:AAI5126

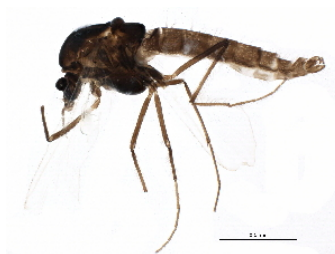

**BIOUG21969-G10 [Lateral]**

Eukiefferiella  
Family: Chironomidae  
BIN URI: BOLD:ABA1245

**BIOUG22364-G01 [Lateral]**

Chironomidae  
Family: Chironomidae  
BIN URI: BOLD:AAQ0601

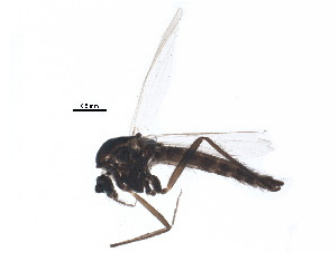

**BIOUG22015-E11 [Lateral]**

Chironomidae  
Family: Chironomidae  
BIN URI: BOLD:ACU6896

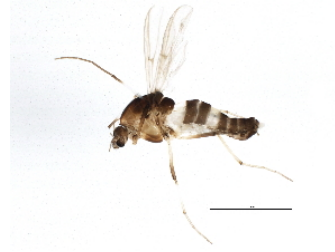

**BIOUG03345-D12 [Lateral]**

Cricotopus bicornis  
Family: Chironomidae  
BIN URI: BOLD:ACC7282

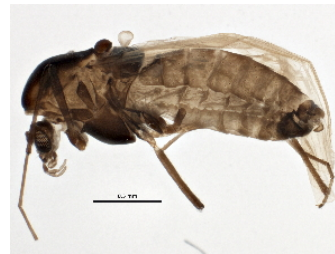

**BIOUG05521-F01 [Lateral]**

Chironomidae  
Family: Chironomidae  
BIN URI: BOLD:ACF9311

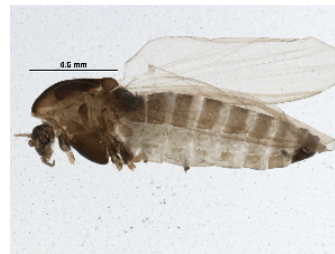

**BIOUG13117-G12 [Lateral]**

Eukiefferiella  
Family: Chironomidae  
BIN URI: BOLD:ACM6904

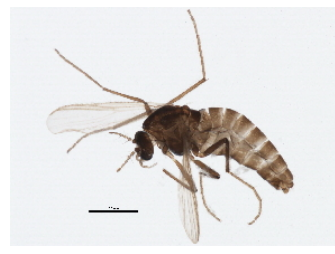

**BIOUG02616-E05 [Lateral]**

Chironomidae  
Family: Chironomidae  
BIN URI: BOLD:ABA1235

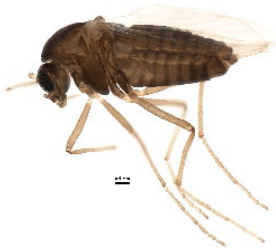

**BIOUG01426-H01 [Lateral]**  
 Orthocladiinae  
 Family: Chironomidae  
 BIN URI: BOLD:ABA1217

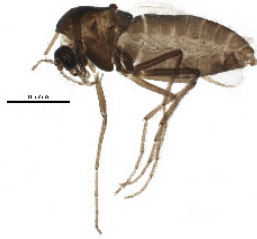

**BIOUG22293-F08 [Lateral]**  
 Chironomidae  
 Family: Chironomidae  
 BIN URI: BOLD:ACJ8377

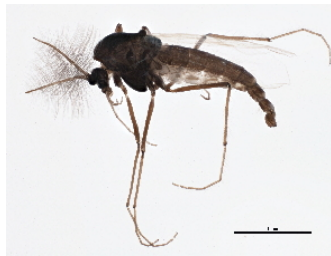

**BIOUG05503-A02 [Lateral]**  
 Smittia sp. 23ES  
 Family: Chironomidae  
 BIN URI: BOLD:AAH9641

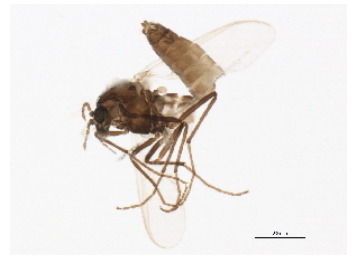

**BIOUG01656-G07 [Lateral]**  
 Smittia  
 Family: Chironomidae  
 BIN URI: BOLD:AAN5355

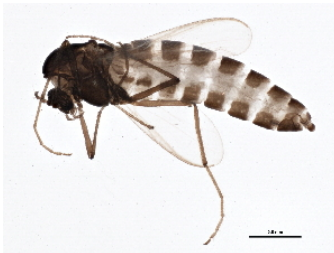

**BIOUG05503-E10 [Lateral]**  
 Smittia sp. 22ES  
 Family: Chironomidae  
 BIN URI: BOLD:AAN5358

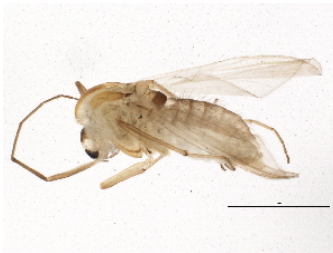

**BIOUG05555-G07 [Lateral]**  
 Chironomidae  
 Family: Chironomidae  
 BIN URI: BOLD:ACA2964

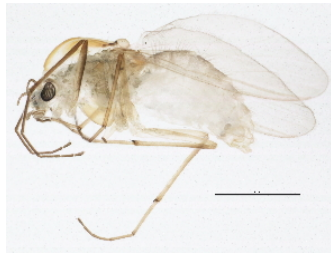

**BIOUG05538-C05 [Lateral]**  
 Orthocladiinae  
 Family: Chironomidae  
 BIN URI: BOLD:ACF8472

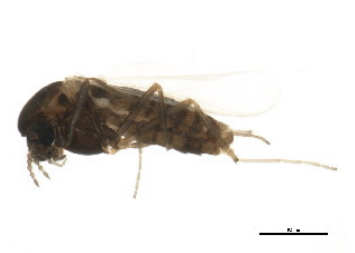

**BIOUG01343-A05 [Lateral]**  
 Smittia  
 Family: Chironomidae  
 BIN URI: BOLD:ABW7321

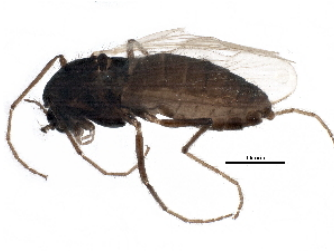

**BIOUG21770-A06 [Lateral]**  
 Smittia sp. 14ES  
 Family: Chironomidae  
 BIN URI: BOLD:AAM7064

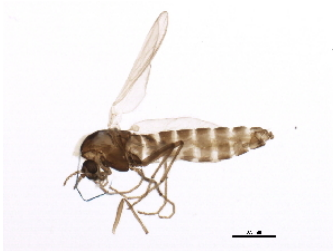

**BIOUG01439-E01 [Lateral]**  
 Chironomidae  
 Family: Chironomidae  
 BIN URI: BOLD:AAN5356

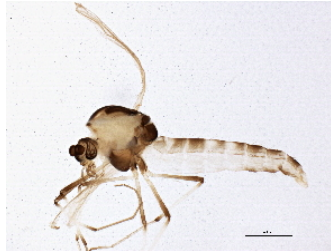

**BIOUG01682-C02 [Lateral]**  
 Cricotopus triannulatus  
 Family: Chironomidae  
 BIN URI: BOLD:AAP5920

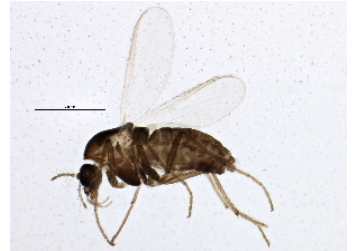

**BIOUG03763-D07 [Lateral]**  
 Smittia edwardsi  
 Family: Chironomidae  
 BIN URI: BOLD:AAF4817

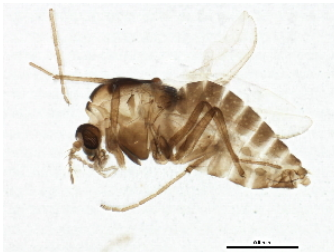

**BIOUG01435-B03 [Lateral]**  
 Chironomidae  
 Family: Chironomidae  
 BIN URI: BOLD:AAZ5601

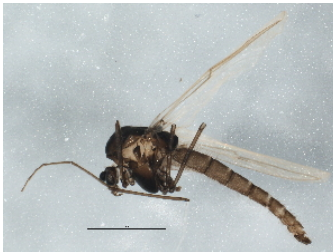

**BIOUG05505-F06 [Lateral]**  
 Orthocladus rivulorum  
 Family: Chironomidae  
 BIN URI: BOLD:AAB3988

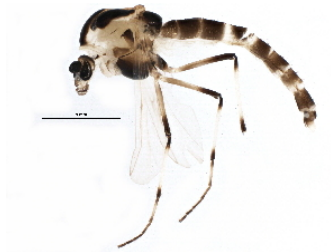

**BIOUG18255-F12 [Lateral]**  
 Cricotopus  
 Family: Chironomidae  
 BIN URI: BOLD:AAA5299

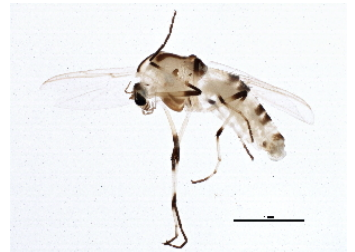

**BIOUG02762-F06 [Lateral]**  
 Chironomidae  
 Family: Chironomidae  
 BIN URI: BOLD:ACA1840

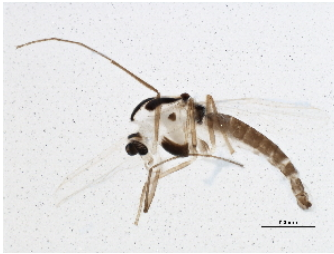

**BIOUG09121-C04 [Lateral]**  
Chironomidae  
Family: Chironomidae  
BIN URI: BOLD:ACK7313

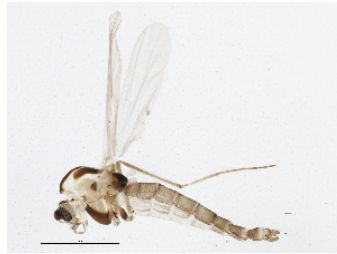

**BIOUG05538-E07 [Lateral]**  
Orthocladius carlatus  
Family: Chironomidae  
BIN URI: BOLD:AAG1000

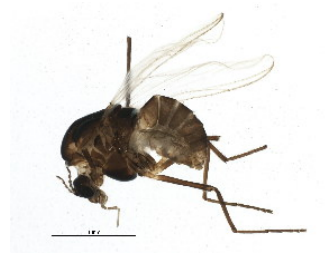

**BIOUG02190-H01 [Lateral]**  
Chironomidae  
Family: Chironomidae  
BIN URI: BOLD:AAM6249

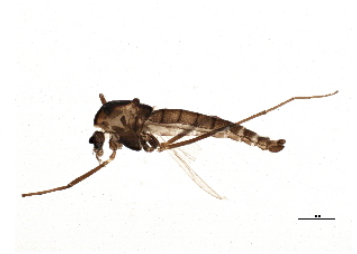

**BIOUG05591-H07 [Lateral]**  
Orthocladius oliveri  
Family: Chironomidae  
BIN URI: BOLD:AAB7872

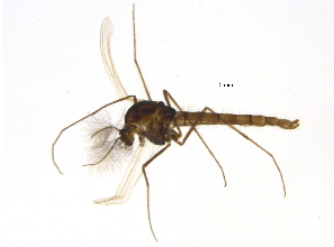

**BIOUG03069-A02 [Lateral]**  
Orthocladius mallochii  
Family: Chironomidae  
BIN URI: BOLD:AAB2644

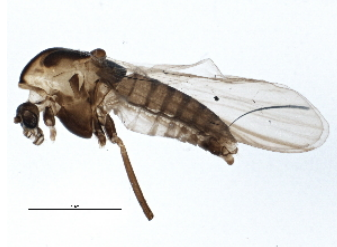

**BIOUG05699-E04 [Lateral]**  
Orthocladius  
Family: Chironomidae  
BIN URI: BOLD:ACV3368

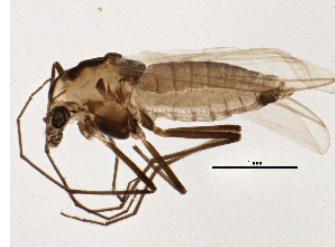

**BIOUG05635-B07 [Lateral]**  
Orthocladius dorenius  
Family: Chironomidae  
BIN URI: BOLD:AAB2641

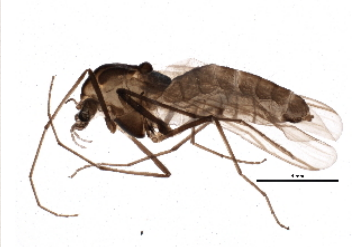

**BIOUG05503-A06 [Lateral]**  
Orthocladius  
Family: Chironomidae  
BIN URI: BOLD:AAG0991

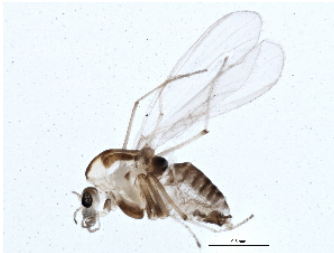

**BIOUG05544-D02 [Lateral]**  
Chironomidae  
Family: Chironomidae  
BIN URI: BOLD:ACF6510

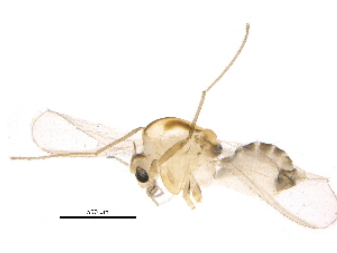

**BIOUG22717-G08 [Lateral]**  
Chironomidae  
Family: Chironomidae  
BIN URI: BOLD:ACL4089

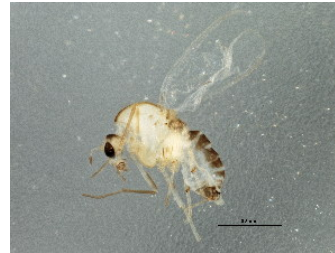

**BIOUG01623-F04 [Lateral]**  
Chironomidae  
Family: Chironomidae  
BIN URI: BOLD:ABV1203

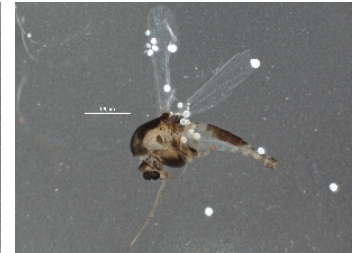

**BIOUG13416-A05 [Lateral]**  
Chironomidae  
Family: Chironomidae  
BIN URI: BOLD:ACU1897

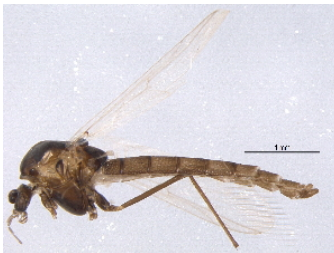

**BIOUG05638-E04 [Lateral]**  
Orthocladius dorenius  
Family: Chironomidae  
BIN URI: BOLD:AAB2645

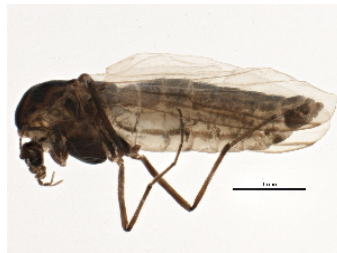

**BIOUG05510-G12 [Lateral]**  
Chironomidae  
Family: Chironomidae  
BIN URI: BOLD:ACF9627

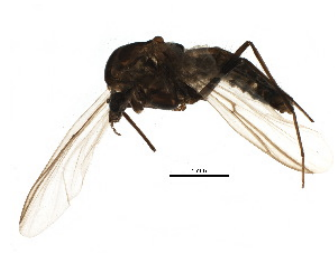

**BIOUG21613-C09 [Lateral]**  
Orthocladius  
Family: Chironomidae  
BIN URI: BOLD:ACF8117

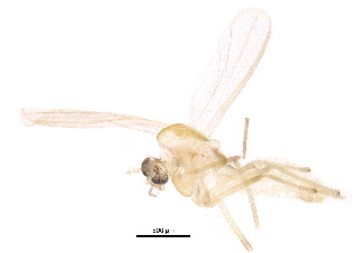

**BIOUG22323-E10 [Lateral]**  
Chironomidae  
Family: Chironomidae  
BIN URI: BOLD:ABV1455

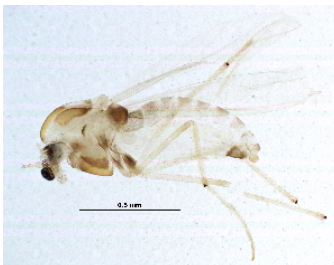

**BIOUG08123-B11 [Lateral]**  
Chironomidae  
Family: Chironomidae  
BIN URI: BOLD:ACJ5130

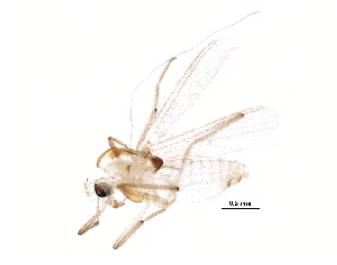

**BIOUG06795-G10 [Lateral]**  
Chironomidae  
Family: Chironomidae  
BIN URI: BOLD:ACR6131

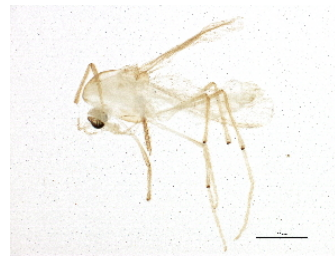

**BIOUG01644-G04 [Lateral]**  
Chironomidae  
Family: Chironomidae  
BIN URI: BOLD:ACR6132

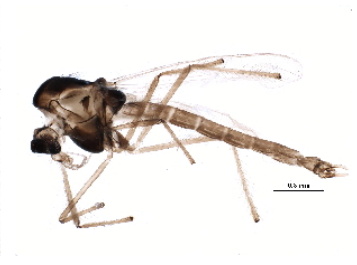

**BIOUG10220-G10 [Lateral]**  
Chironomidae  
Family: Chironomidae  
BIN URI: BOLD:ACR6101



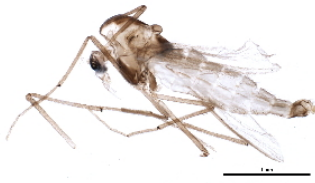

**BIOUG05546-D03 [Lateral]**  
 Paratanytarsus  
 Family: Chironomidae  
 BIN URI: BOLD:AAP2907

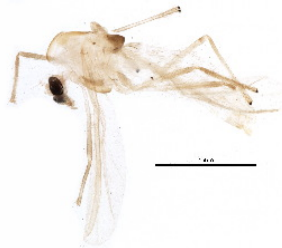

**BIOUG22466-D04 [Lateral]**  
 Paratanytarsus sp. TE03  
 Family: Chironomidae  
 BIN URI: BOLD:AAE3675

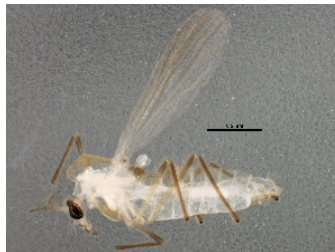

**BIOUG03750-E07 [Lateral]**  
 Paratanytarsus  
 Family: Chironomidae  
 BIN URI: BOLD:ACE7452

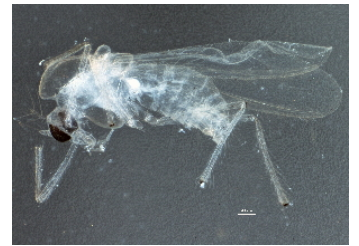

**BIOUG05794-G06 [Lateral]**  
 Chironomidae  
 Family: Chironomidae  
 BIN URI: BOLD:ACG2927

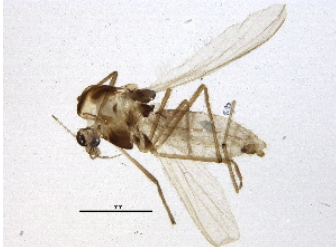

**BIOUG05880-E07 [Lateral]**  
 Paratanytarsus  
 Family: Chironomidae  
 BIN URI: BOLD:ACF7858

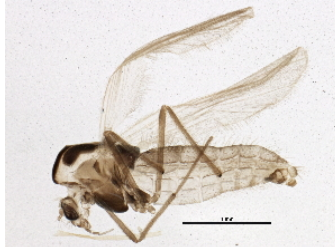

**BIOUG05516-G08 [Lateral]**  
 Chironomidae  
 Family: Chironomidae  
 BIN URI: BOLD:ACF7859

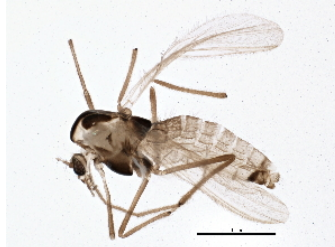

**BIOUG05514-C06 [Lateral]**  
 Chironomidae  
 Family: Chironomidae  
 BIN URI: BOLD:ABV9028

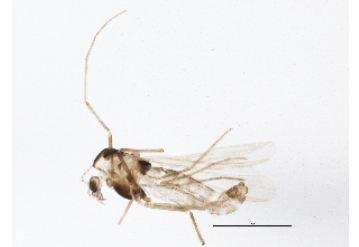

**BIOUG05547-A09 [Lateral]**  
 Chironomidae  
 Family: Chironomidae  
 BIN URI: BOLD:ACV1253

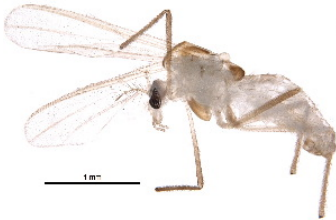

**BIOUG22352-D11 [Lateral]**  
 Paratanytarsus dissimilis  
 Family: Chironomidae  
 BIN URI: BOLD:AAE3698

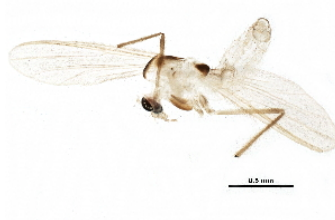

**BIOUG21909-A06 [Lateral]**  
 Paratanytarsus  
 Family: Chironomidae  
 BIN URI: BOLD:AAI2606

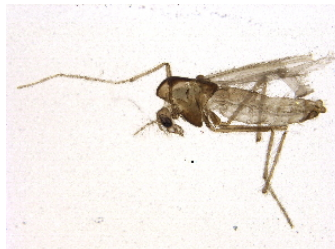

**BIOUG03983-A09 [Lateral]**  
 Paratanytarsus  
 Family: Chironomidae  
 BIN URI: BOLD:ACC1156

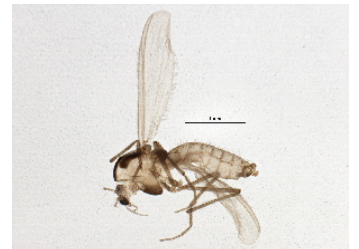

**BIOUG05510-F06 [Lateral]**  
 Paratanytarsus grimmii  
 Family: Chironomidae  
 BIN URI: BOLD:AD1485

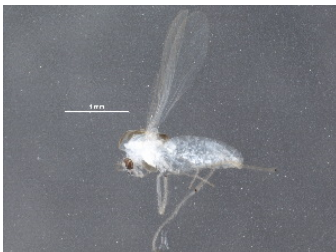

**BIOUG22295-E09 [Lateral]**  
 Paratanytarsus laccophilus  
 Family: Chironomidae  
 BIN URI: BOLD:ACF2457

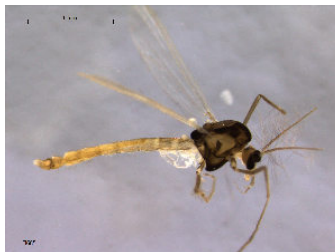

**Finnmark685 [Lateral]**  
 Paratanytarsus laccophilus  
 Family: Chironomidae  
 BIN URI: BOLD:AAC8842

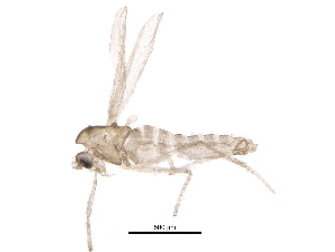

**BIOUG23312-F12 [Lateral]**  
 Chironomidae  
 Family: Chironomidae  
 BIN URI: BOLD:ACW1260

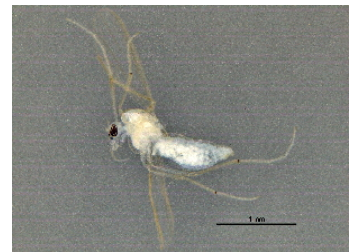

**BIOUG22717-E03 [Lateral]**  
 Tanytarsus guerlus  
 Family: Chironomidae  
 BIN URI: BOLD:AAC4523

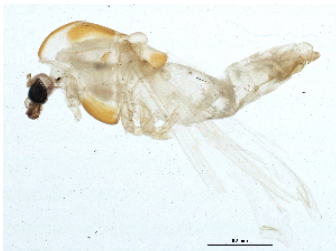

**BIOUG06542-B10 [Lateral]**  
 Chironomidae  
 Family: Chironomidae  
 BIN URI: BOLD:AAG5465

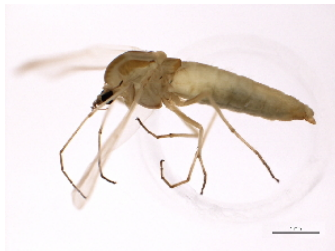

**09BBDIP-1691 [Lateral]**  
 Chironomidae  
 Family: Chironomidae  
 BIN URI: BOLD:AAM6209

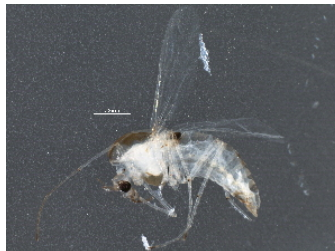

**BIOUG12303-D11 [Lateral]**  
 Chironomidae  
 Family: Chironomidae  
 BIN URI: BOLD:ACM9846

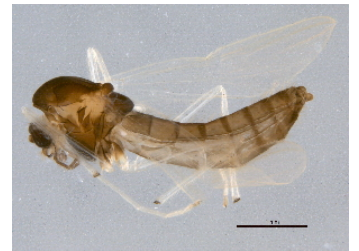

**BIOUG04684-A10 [Lateral]**  
 Chironomidae  
 Family: Chironomidae  
 BIN URI: BOLD:ACD9755

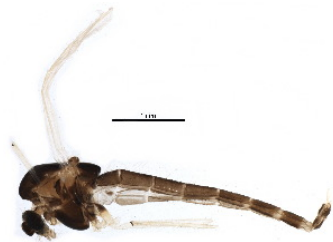

**BIOUG22467-G05 [Lateral]**  
Phaenopsectra  
Family: Chironomidae  
BIN URI: BOLD:AAM6287

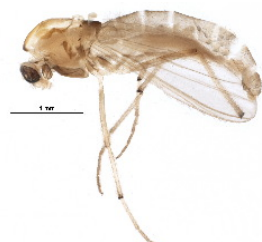

**BIOUG22415-H06 [Lateral]**  
Chironomidae  
Family: Chironomidae  
BIN URI: BOLD:ACI3882

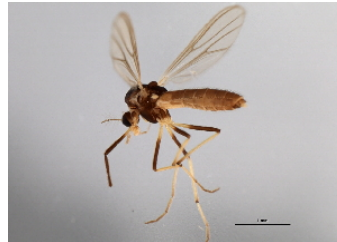

**08TTML-2077 [Lateral]**  
Paratendipes  
Family: Chironomidae  
BIN URI: BOLD:AAG5473

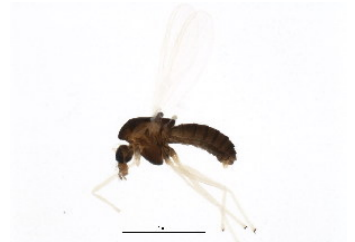

**BIOUG00978-G04 [Lateral]**  
Lauterborniella agrayloides  
Family: Chironomidae  
BIN URI: BOLD:AAN5343

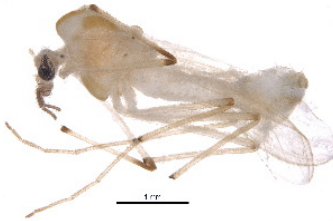

**BIOUG22356-C06 [Lateral]**  
Microtendipes pedellus  
Family: Chironomidae  
BIN URI: BOLD:AAE0707

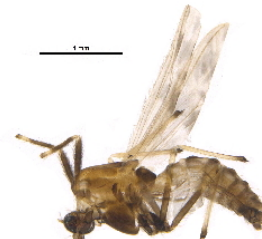

**BIOUG23078-H08 [Lateral]**  
Chironominae  
Family: Chironomidae  
BIN URI: BOLD:ABV1452

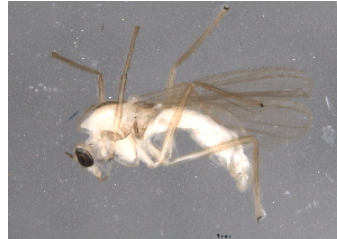

**BIOUG08642-C02 [Lateral]**  
Polypedilum  
Family: Chironomidae  
BIN URI: BOLD:ACJ7070

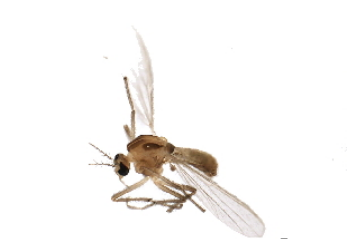

**10JSROW-1726 [Lateral]**  
Chironomidae  
Family: Chironomidae  
BIN URI: BOLD:AAP8069

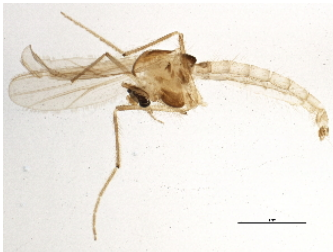

**BIOUG05172-G01 [Lateral]**  
Chironomidae  
Family: Chironomidae  
BIN URI: BOLD:ACG4079

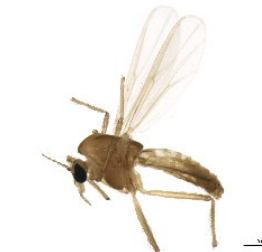

**BIOUG01835-D10 [Lateral]**  
Chironomidae  
Family: Chironomidae  
BIN URI: BOLD:ACM1304

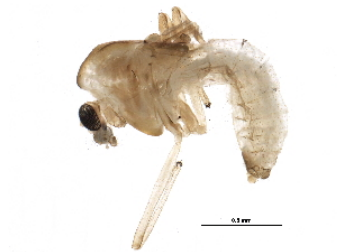

**BIOUG21891-H08 [Lateral]**  
Chironomidae  
Family: Chironomidae  
BIN URI: BOLD:ACV5080

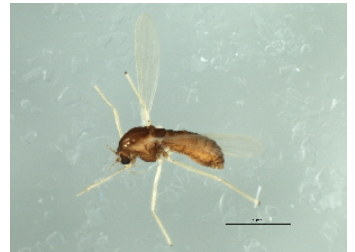

**08TTML-1257 [Lateral]**  
Chironomidae  
Family: Chironomidae  
BIN URI: BOLD:AAN5332

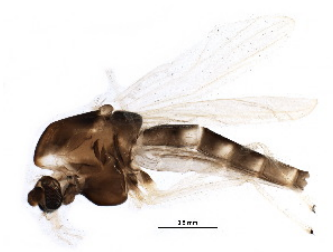

**BIOUG22416-G05 [Lateral]**  
Polypedilum  
Family: Chironomidae  
BIN URI: BOLD:AAG5541

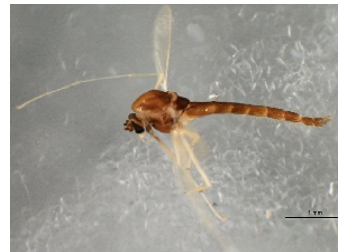

**08TTML-1484 [Lateral]**  
Chironomidae  
Family: Chironomidae  
BIN URI: BOLD:AAN5334

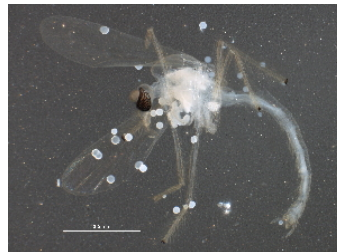

**BIOUG22730-H11 [Lateral]**  
Polypedilum  
Family: Chironomidae  
BIN URI: BOLD:ABA6440

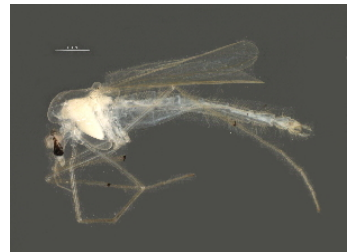

**BIOUG08875-C10 [Lateral]**  
Chironominae  
Family: Chironomidae  
BIN URI: BOLD:ACK7314

**IMAGE NOT AVAILABLE**

**BIOUG22330-D06**  
Polypedilum convictum  
Family: Chironomidae

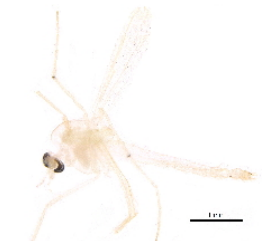

**BIOUG22323-G01 [Lateral]**  
Polypedilum  
Family: Chironomidae  
BIN URI: BOLD:AAD1395

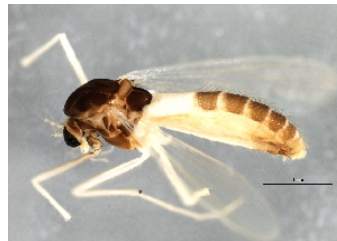

**08TTML-1800 [Lateral]**  
Chironomidae  
Family: Chironomidae  
BIN URI: BOLD:AAG5516

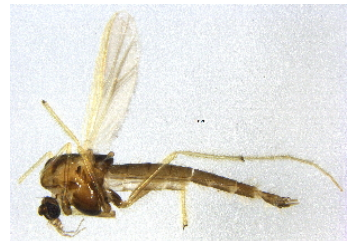

**BIOUG03899-C02 [Lateral]**  
Chironominae  
Family: Chironomidae  
BIN URI: BOLD:ACB9392

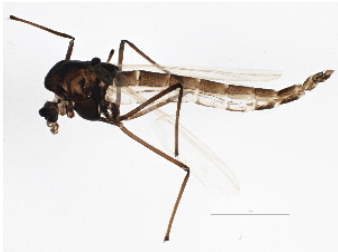

**BIOUG05715-G06 [Lateral]**  
 Chironomidae  
 Family: Chironomidae  
 BIN URI: BOLD:ACF8174

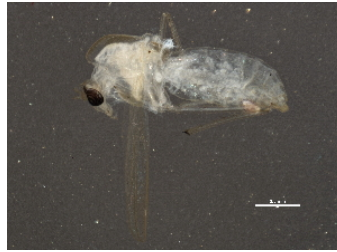

**BIOUG07641-D06 [Lateral]**  
 Chironominae  
 Family: Chironomidae  
 BIN URI: BOLD:AAN5344

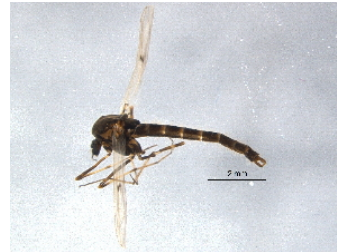

**BIOUG05700-H03 [Lateral]**  
 Chironomidae  
 Family: Chironomidae  
 BIN URI: BOLD:AAP3005

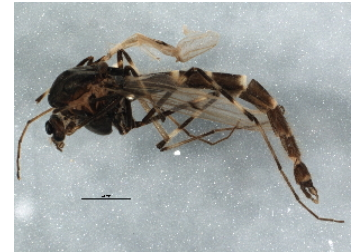

**BIOUG05679-G02 [Lateral]**  
 Chironomidae  
 Family: Chironomidae  
 BIN URI: BOLD:AAQ3439

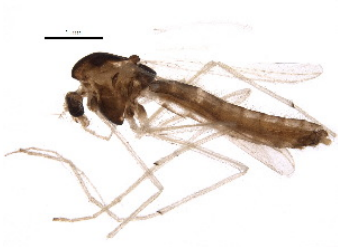

**BIOUG09961-E12 [Lateral]**  
 Chironomidae  
 Family: Chironomidae  
 BIN URI: BOLD:AAZ5511

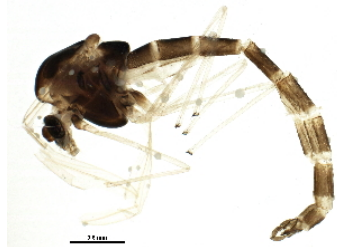

**BIOUG21891-B07 [Lateral]**  
 Chironomidae  
 Family: Chironomidae  
 BIN URI: BOLD:ACV5306

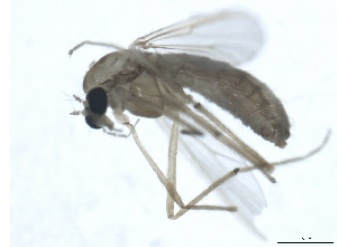

**10BBDIP-1535 [Lateral]**  
 Chironomidae  
 Family: Chironomidae  
 BIN URI: BOLD:AAD1397

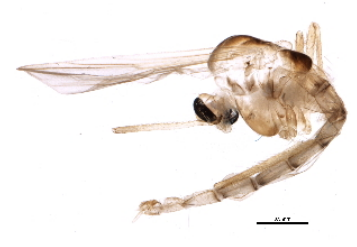

**BIOUG16168-F03 [Lateral]**  
 Polypedium  
 Family: Chironomidae  
 BIN URI: BOLD:ACA3244

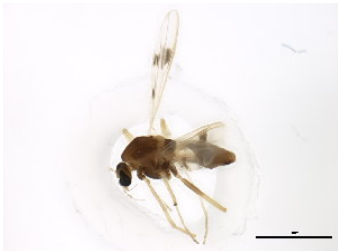

**BIOUG01410-E06 [Lateral]**  
 Polypedium  
 Family: Chironomidae  
 BIN URI: BOLD:ABA0772

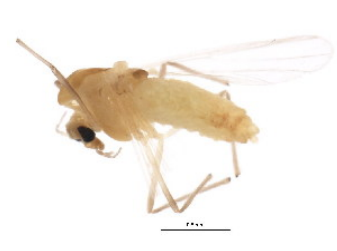

**BIOUG01400-A04 [Lateral]**  
 Chironomidae  
 Family: Chironomidae  
 BIN URI: BOLD:AAH0042

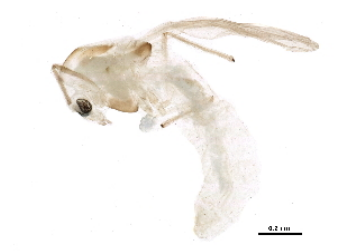

**BIOUG22235-D05 [Lateral]**  
 Cladotanytarsus  
 Family: Chironomidae  
 BIN URI: BOLD:AAI4121

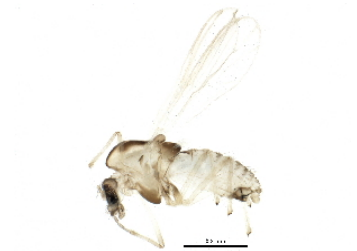

**BIOUG22716-C11 [Lateral]**  
 Chironomidae  
 Family: Chironomidae  
 BIN URI: BOLD:ACC8280

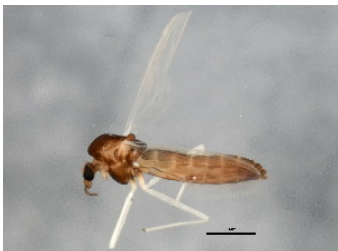

**BIOUG01422-B11 [Lateral]**  
 Chironomidae  
 Family: Chironomidae  
 BIN URI: BOLD:AAG0920

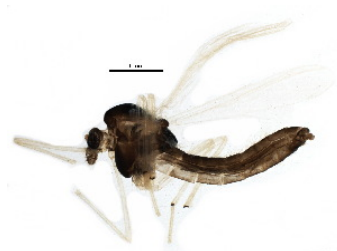

**BIOUG22239-F10 [Lateral]**  
 Tribelos  
 Family: Chironomidae  
 BIN URI: BOLD:ACN2444

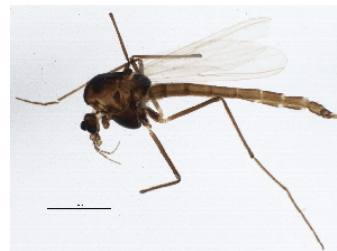

**BIOUG03279-E12 [Lateral]**  
 Chironomidae  
 Family: Chironomidae  
 BIN URI: BOLD:ACA7493

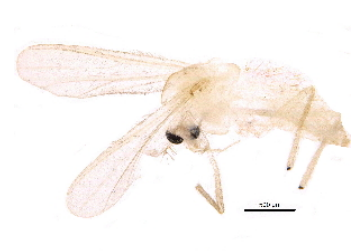

**BIOUG22329-B05 [Lateral]**  
 Tanytarsus wirthi  
 Family: Chironomidae  
 BIN URI: BOLD:AAD2144

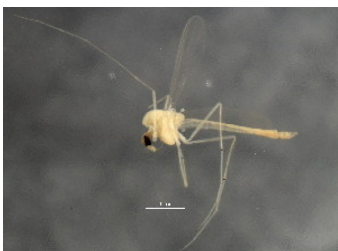

**BIOUG01389-E07 [Lateral]**  
 Chironomidae  
 Family: Chironomidae  
 BIN URI: BOLD:ACJ3722

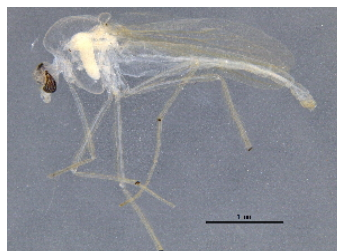

**BIOUG22237-E12 [Lateral]**  
 Tanytarsus mendax  
 Family: Chironomidae  
 BIN URI: BOLD:ACV3832

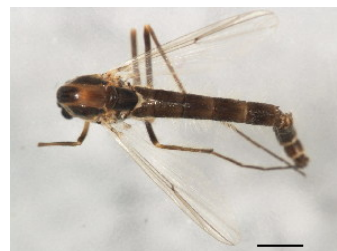

**10JSROW-1043 [Dorsal]**  
 Chironomidae  
 Family: Chironomidae  
 BIN URI: BOLD:AAP6878

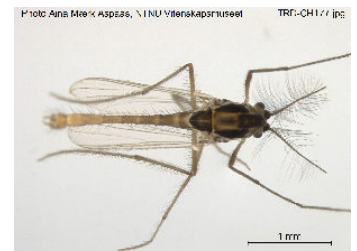

**TRD-CH177 [Dorsal]**  
 Cladotanytarsus atridorsum  
 Family: Chironomidae  
 BIN URI: BOLD:AAJ3263

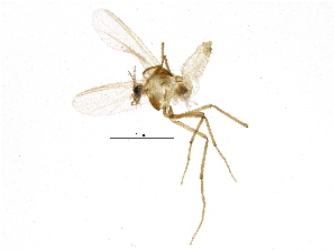

**BIOUG03122-A10 [Lateral]**  
 Cladotanytarsus  
 Family: Chironomidae  
 BIN URI: BOLD:ACA3036

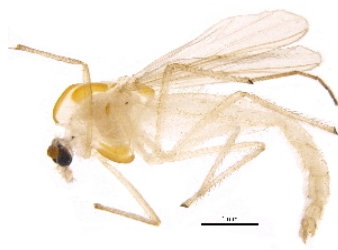

**BIOUG22323-E04 [Lateral]**  
 Chironomidae  
 Family: Chironomidae  
 BIN URI: BOLD:AAM6286

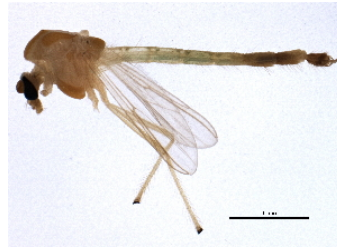

**BIOUG01686-F07 [Lateral]**  
 Dicotendipes  
 Family: Chironomidae  
 BIN URI: BOLD:ABV9293

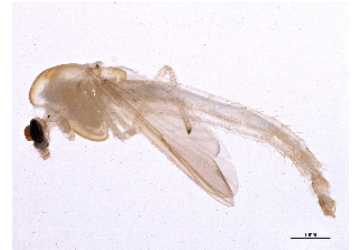

**BIOUG03125-F03 [Lateral]**  
 Chironominae  
 Family: Chironomidae  
 BIN URI: BOLD:ACA7555

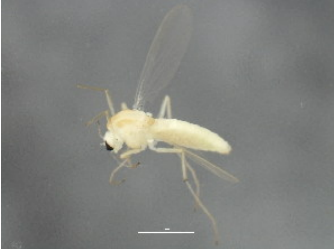

**10JSROW-0838 [Lateral]**  
 Chironomidae  
 Family: Chironomidae  
 BIN URI: BOLD:AAV5938

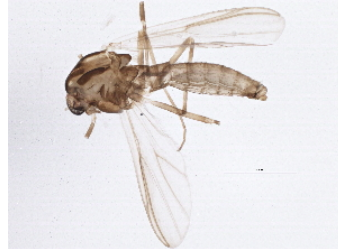

**BIOUG08643-C02 [Lateral]**  
 Dicotendipes  
 Family: Chironomidae  
 BIN URI: BOLD:AAG5423

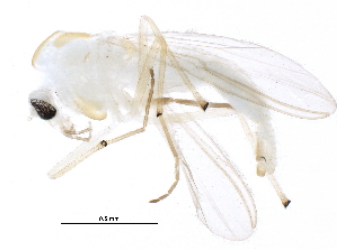

**BIOUG22084-D08 [Lateral]**  
 Dicotendipes tritonus  
 Family: Chironomidae  
 BIN URI: BOLD:AAC0706

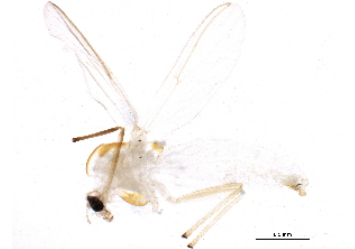

**BIOUG22084-E01 [Lateral]**  
 Chironomidae  
 Family: Chironomidae  
 BIN URI: BOLD:AAG5464

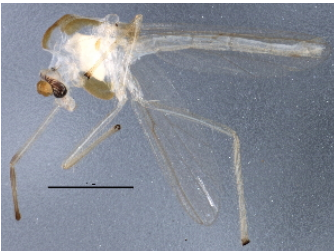

**BIOUG03554-G02 [Lateral]**  
 Dicotendipes  
 Family: Chironomidae  
 BIN URI: BOLD:AAN5383

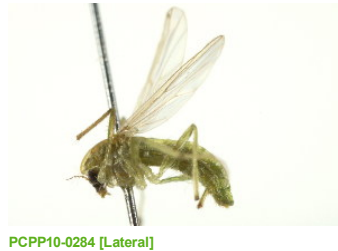

**PCPP10-0284 [Lateral]**  
 Dicotendipes  
 Family: Chironomidae  
 BIN URI: BOLD:AAP6882

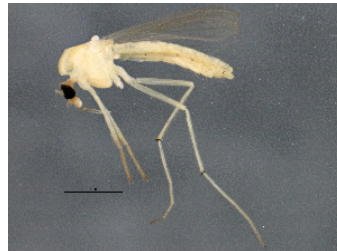

**BIOUG03138-D03 [Lateral]**  
 Chironomidae  
 Family: Chironomidae  
 BIN URI: BOLD:AAL7329

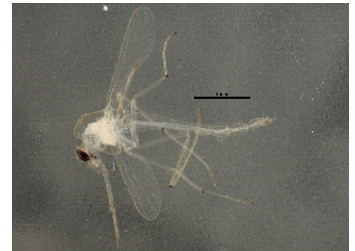

**BIOUG03909-H11 [Lateral]**  
 Chironomidae  
 Family: Chironomidae  
 BIN URI: BOLD:AAN5354

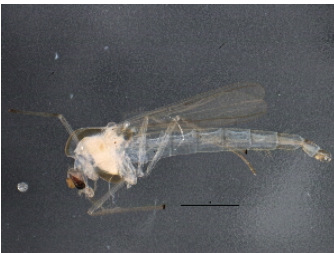

**BIOUG03346-D03 [Lateral]**  
 Chironomidae  
 Family: Chironomidae  
 BIN URI: BOLD:AAQ0607

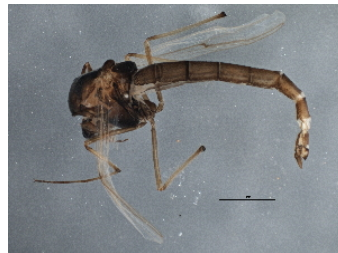

**BIOUG08376-E02 [Lateral]**  
 Dicotendipes  
 Family: Chironomidae  
 BIN URI: BOLD:AAI6244

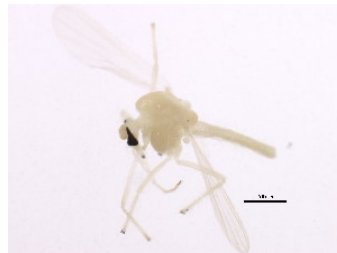

**BIOUG00860-D01 [Lateral]**  
 Chironomidae  
 Family: Chironomidae  
 BIN URI: BOLD:ABA0771

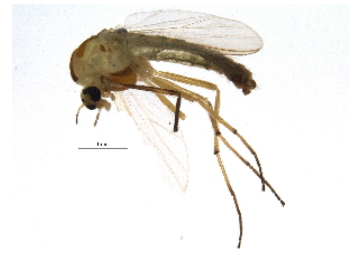

**BIOUG02758-C08 [Dorsal]**  
 Chironominae  
 Family: Chironomidae  
 BIN URI: BOLD:AAG5506

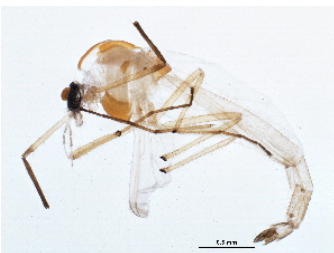

**BIOUG12412-H11 [Lateral]**  
 Chironominae  
 Family: Chironomidae  
 BIN URI: BOLD:ACN5893

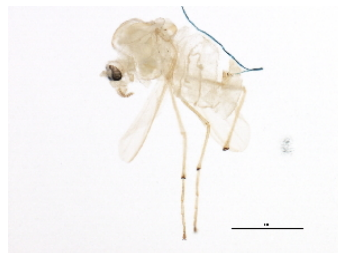

**BIOUG01774-D08 [Lateral]**  
 Parachironomus  
 Family: Chironomidae  
 BIN URI: BOLD:ACE5981

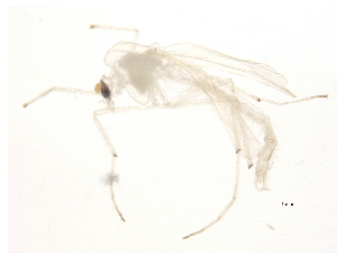

**BIOUG03695-A05 [Lateral]**  
 Parachironomus  
 Family: Chironomidae  
 BIN URI: BOLD:ACB9399

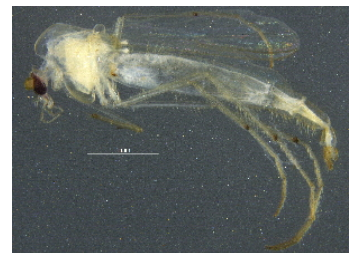

**BIOUG03103-C04 [Lateral]**  
 Parachironomus  
 Family: Chironomidae  
 BIN URI: BOLD:ABX7479

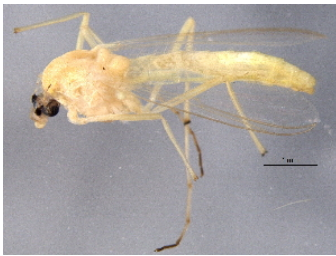

**BIOUG02757-B06 [Lateral]**  
Chironominae  
Family: Chironomidae  
BIN URI: BOLD:ACA8801

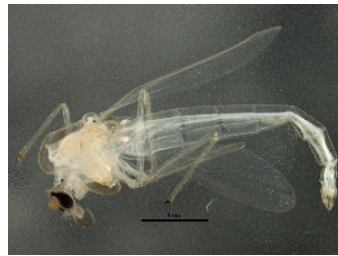

**BIOUG02864-F06 [Lateral]**  
Chironomidae  
Family: Chironomidae  
BIN URI: BOLD:ACA9312

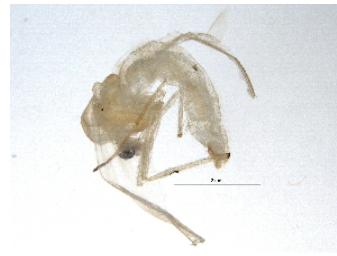

**BIOUG03167-F04 [Lateral]**  
Einfeldia  
Family: Chironomidae  
BIN URI: BOLD:AAG5475

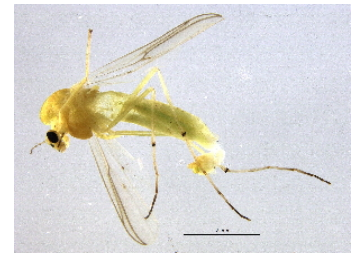

**BIOUG04935-F10 [Lateral]**  
Einfeldia  
Family: Chironomidae  
BIN URI: BOLD:ACP6588

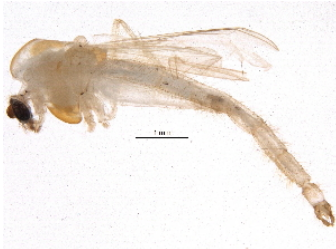

**BIOUG09961-F06 [Lateral]**  
Einfeldia  
Family: Chironomidae  
BIN URI: BOLD:ACV5157

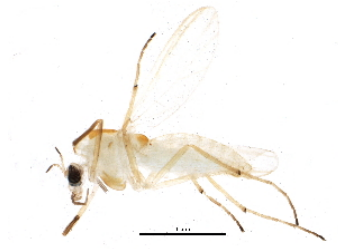

**BIOUG08608-C12 [Lateral]**  
Chironomidae  
Family: Chironomidae  
BIN URI: BOLD:ACK1520

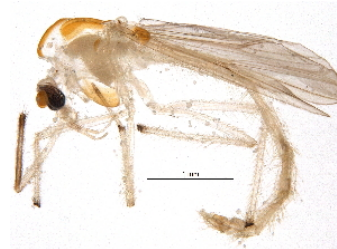

**BIOUG06890-H09 [Lateral]**  
Chironominae  
Family: Chironomidae  
BIN URI: BOLD:ACL5434

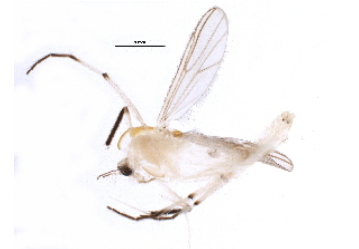

**BIOUG09955-G10 [Lateral]**  
Chironomidae  
Family: Chironomidae  
BIN URI: BOLD:ACI4243

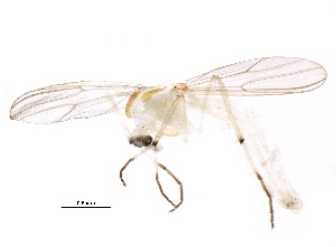

**BIOUG22462-D03 [Lateral]**  
Chironomidae  
Family: Chironomidae  
BIN URI: BOLD:ACV2188

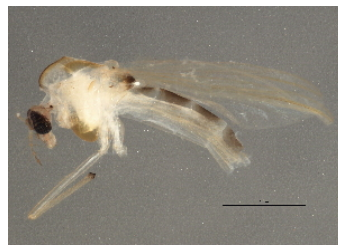

**BIOUG02622-F07 [Lateral]**  
Chironomidae  
Family: Chironomidae  
BIN URI: BOLD:AAM6230

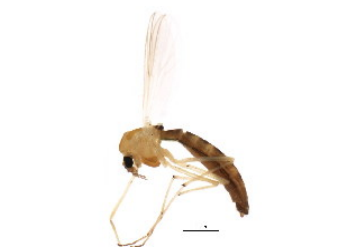

**BIOUG01411-H05 [Lateral]**  
Chironomidae  
Family: Chironomidae  
BIN URI: BOLD:AAZ0144

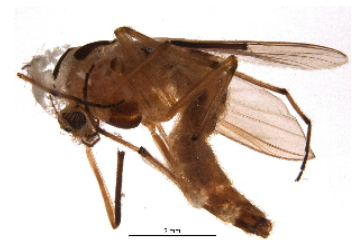

**BIOUG10470-A06 [Lateral]**  
Chironomus  
Family: Chironomidae  
BIN URI: BOLD:ACL4512

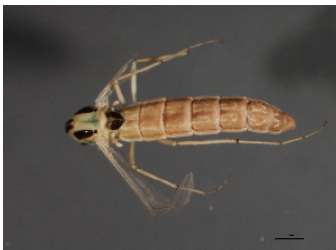

**08BBDIP-1925 [Dorsal]**  
Chironomus  
Family: Chironomidae  
BIN URI: BOLD:AAG5478

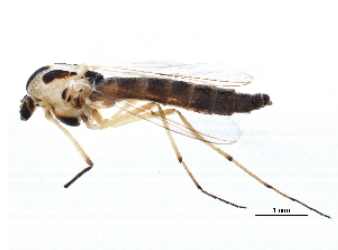

**BIOUG21931-C06 [Lateral]**  
Chironomus nr. atroviridis 2i IP2013  
Family: Chironomidae  
BIN URI: BOLD:ACQ6990

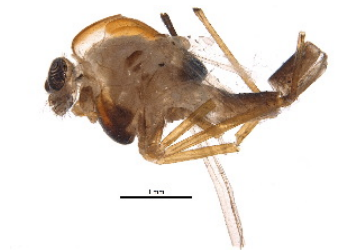

**BIOUG20569-F11 [Lateral]**  
Chironomus ochreatus  
Family: Chironomidae  
BIN URI: BOLD:ACV5571

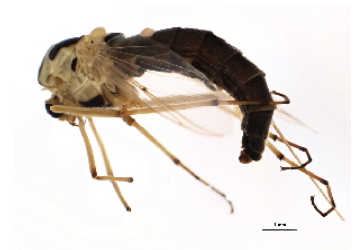

**08BBDIP-2632 [Lateral]**  
Chironomus dilutus  
Family: Chironomidae  
BIN URI: BOLD:AAB4658

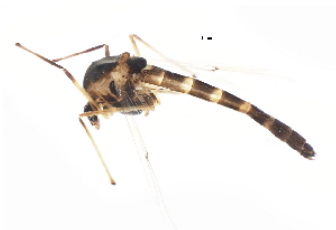

**10JSROW-1494 [Lateral]**  
Chironomus melanesiens  
Family: Chironomidae  
BIN URI: BOLD:AAI4303

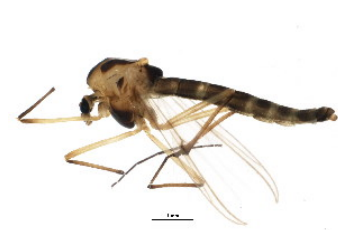

**BIOUG01338-F02 [Lateral]**  
Chironomus acidophilus  
Family: Chironomidae  
BIN URI: BOLD:AAJ4295

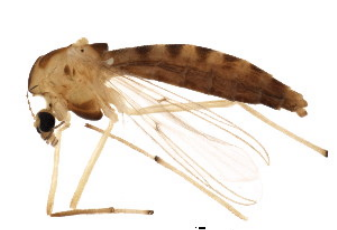

**BIOUG01645-A11 [Lateral]**  
Chironomus  
Family: Chironomidae  
BIN URI: BOLD:ABV1236

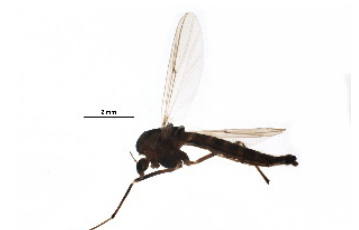

**BIOUG22289-E12 [Lateral]**  
Chironomidae  
Family: Chironomidae  
BIN URI: BOLD:ACV5328

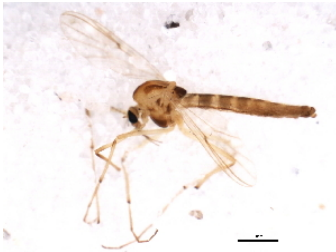

**08TTML-0864 [Lateral]**  
 Chironomus maturus  
 Family: Chironomidae  
 BIN URI: BOLD:AAB4657

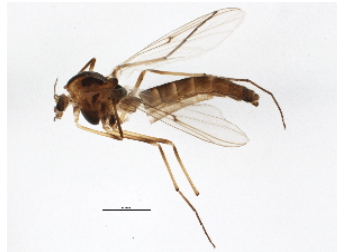

**BIOUG05668-B11 [Lateral]**  
 Chironomidae  
 Family: Chironomidae  
 BIN URI: BOLD:AAG5455

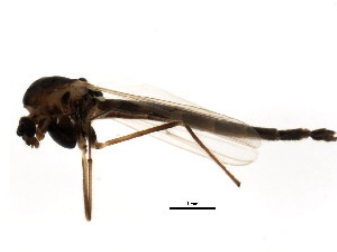

**BIOUG01344-B07 [Lateral]**  
 Chironomidae  
 Family: Chironomidae  
 BIN URI: BOLD:AAM6288

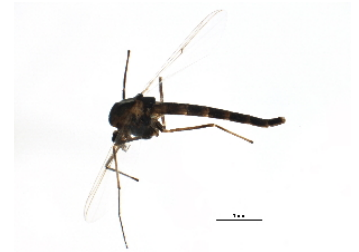

**BIOUG21589-D10 [Lateral]**  
 Chironomus  
 Family: Chironomidae  
 BIN URI: BOLD:ACA9275

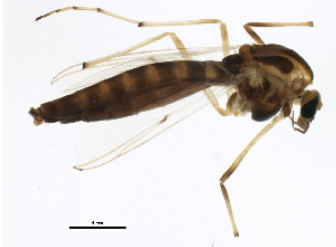

**BIOUG00893-H06 [Lateral]**  
 Chironomus  
 Family: Chironomidae  
 BIN URI: BOLD:ABV1458

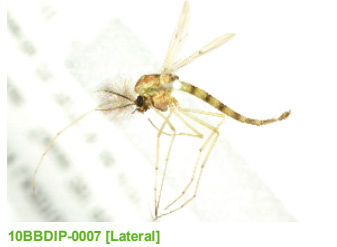

**10BBDIP-0007 [Lateral]**  
 Chironomidae  
 Family: Chironomidae  
 BIN URI: BOLD:AAB7030

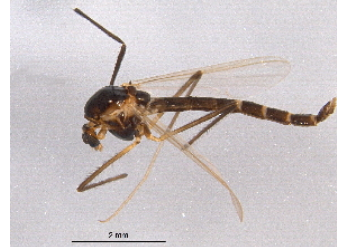

**BIOUG02752-B02 [Lateral]**  
 Chironomidae  
 Family: Chironomidae  
 BIN URI: BOLD:AAN5311

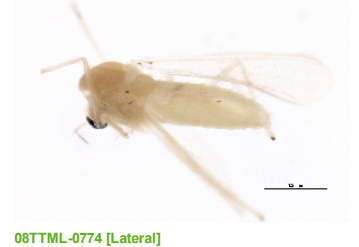

**08TTML-0774 [Lateral]**  
 Chironomidae  
 Family: Chironomidae  
 BIN URI: BOLD:AAN5329

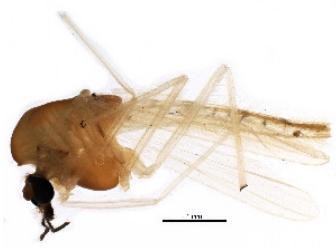

**BIOUG22324-G07 [Lateral]**  
 Chironomidae  
 Family: Chironomidae  
 BIN URI: BOLD:AAG5457

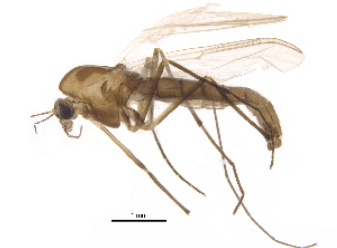

**BIOUG22330-D04 [Lateral]**  
 Chironomidae  
 Family: Chironomidae  
 BIN URI: BOLD:ACV3991

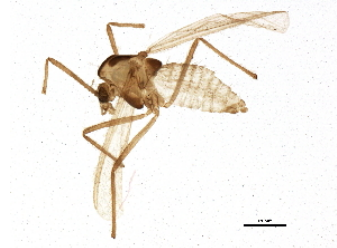

**BIOUG01648-B04 [Lateral]**  
 Tanytarsus  
 Family: Chironomidae  
 BIN URI: BOLD:ABZ6565

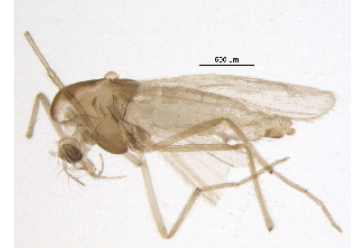

**BIOUG05623-D01 [Lateral]**  
 Chironomidae  
 Family: Chironomidae  
 BIN URI: BOLD:ACF8829

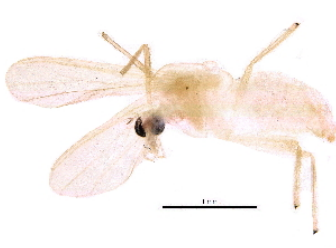

**BIOUG22329-A07 [Lateral]**  
 Tanytarsus  
 Family: Chironomidae  
 BIN URI: BOLD:AAG5523

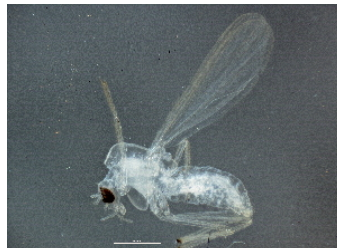

**BIOUG05796-F07 [Lateral]**  
 Chironomidae  
 Family: Chironomidae  
 BIN URI: BOLD:ACA4863

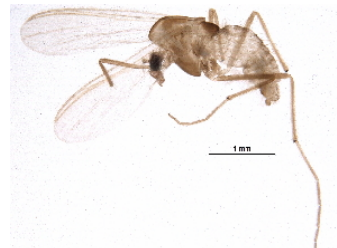

**BIOUG09675-A06 [Lateral]**  
 Chironominae  
 Family: Chironomidae  
 BIN URI: BOLD:ACL8053

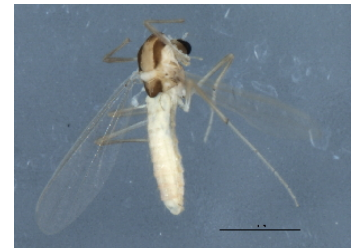

**10JSROW-0174 [Dorsal]**  
 Chironomidae  
 Family: Chironomidae  
 BIN URI: BOLD:AAP6875

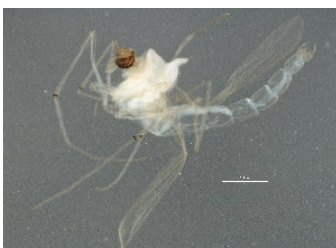

**BIOUG01622-H09 [Lateral]**  
 Chironomidae  
 Family: Chironomidae  
 BIN URI: BOLD:ABV1284

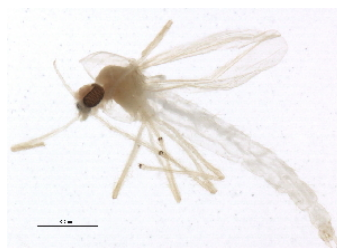

**BIOUG00898-C02 [Lateral]**  
 Chironominae  
 Family: Chironomidae  
 BIN URI: BOLD:ABV1396

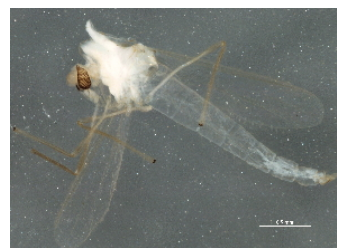

**BIOUG01676-H03 [Lateral]**  
 Chironomidae  
 Family: Chironomidae  
 BIN URI: BOLD:ABV1221

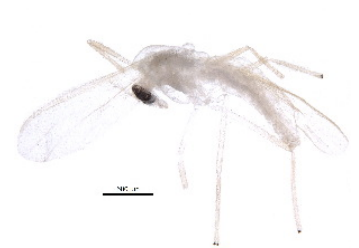

**BIOUG22356-D12 [Lateral]**  
 Rheotanytarsus  
 Family: Chironomidae  
 BIN URI: BOLD:ABA6514

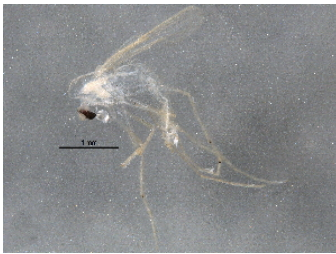

**BIOUG08481-B05 [Lateral]**  
Rheotanytarsus  
Family: Chironomidae  
BIN URI: BOLD:ACJ8793

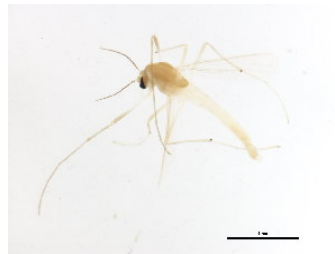

**BIOUG01410-A08 [Lateral]**  
Chironomidae  
Family: Chironomidae  
BIN URI: BOLD:AAV6213

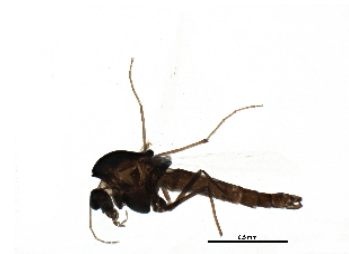

**BIOUG22327-H09 [Lateral]**  
Rheotanytarsus pellucidus  
Family: Chironomidae  
BIN URI: BOLD:AAI0332

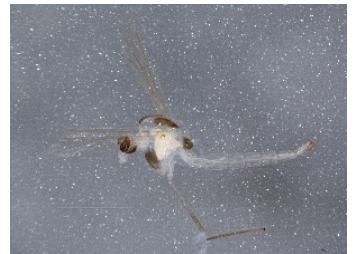

**BIOUG08495-D05 [Lateral]**  
Chironomidae  
Family: Chironomidae  
BIN URI: BOLD:ACJ6550

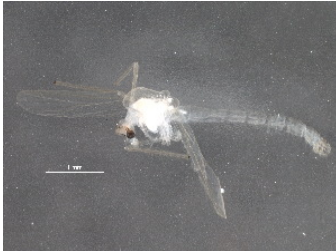

**BIOUG22418-H07 [Lateral]**  
Tanytarsus  
Family: Chironomidae  
BIN URI: BOLD:ACR8658

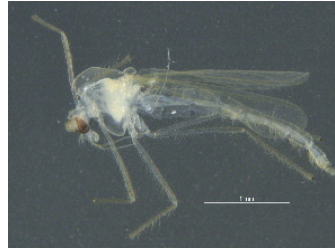

**BIOUG03244-G01 [Lateral]**  
Tanytarsus guerlus  
Family: Chironomidae  
BIN URI: BOLD:AAC4525

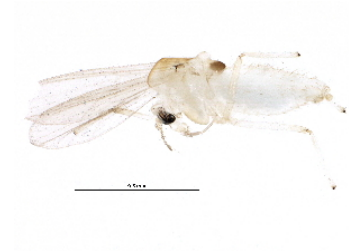

**BIOUG22366-E10 [Lateral]**  
Stempellinella fimbriata  
Family: Chironomidae  
BIN URI: BOLD:AAD0300

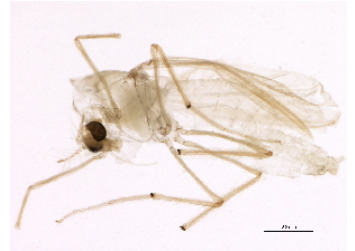

**BIOUG01656-G11 [Lateral]**  
Chironomidae  
Family: Chironomidae  
BIN URI: BOLD:AAN5391

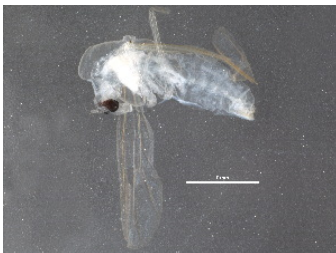

**BIOUG20384-D12 [Lateral]**  
Diptera  
BIN URI: BOLD:ABA7852

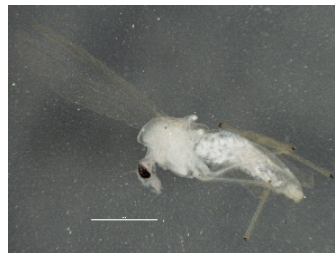

**BIOUG03167-E10 [Lateral]**  
Tanytarsus  
Family: Chironomidae  
BIN URI: BOLD:ACC1283

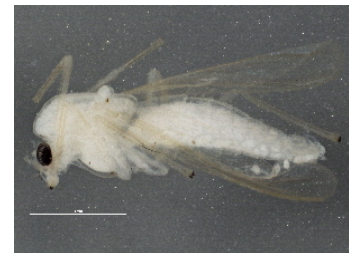

**BIOUG03110-A06 [Lateral]**  
Chironomidae  
Family: Chironomidae  
BIN URI: BOLD:ACC1609

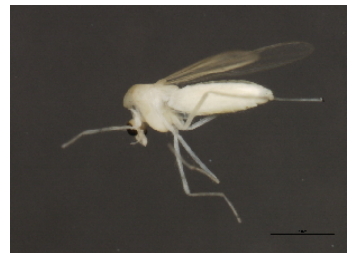

**08BBDIP-1863 [Lateral]**  
Chironomidae  
Family: Chironomidae  
BIN URI: BOLD:AAG5463

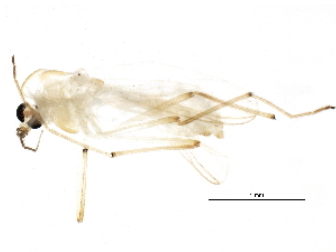

**BIOUG22362-B05 [Lateral]**  
Tanytarsus  
Family: Chironomidae  
BIN URI: BOLD:ACG9026

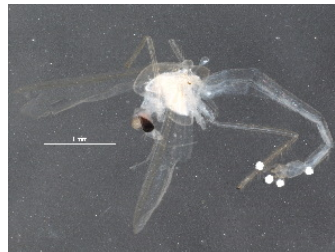

**BIOUG22417-F07 [Lateral]**  
Tanytarsus  
Family: Chironomidae  
BIN URI: BOLD:ACI3514

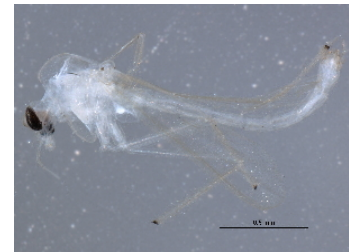

**BIOUG22084-E04 [Lateral]**  
Tanytarsus  
Family: Chironomidae  
BIN URI: BOLD:ACV4276

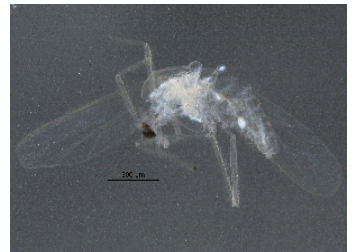

**BIOUG11280-D03 [Lateral]**  
Tanytarsus  
Family: Chironomidae  
BIN URI: BOLD:ACM0828

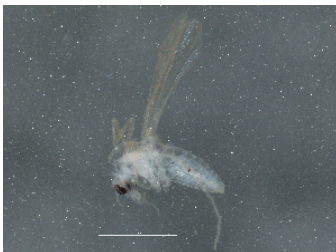

**BIOUG03341-G02 [Lateral]**  
Chironomidae  
Family: Chironomidae  
BIN URI: BOLD:AAP7035

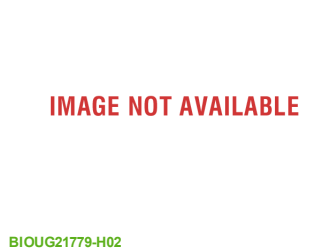

**IMAGE NOT AVAILABLE**

**BIOUG21779-H02**  
Tanytarsus  
Family: Chironomidae

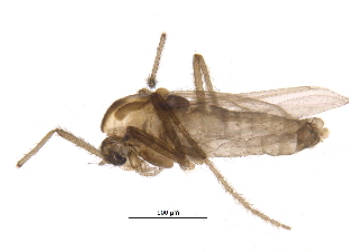

**BIOUG22329-E09 [Lateral]**  
Stempellinella  
Family: Chironomidae  
BIN URI: BOLD:AAN5345

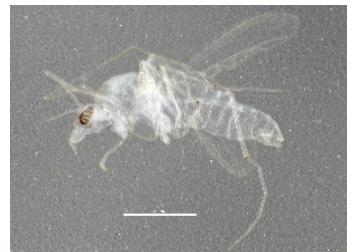

**BIOUG01612-A03 [Lateral]**  
Chironomidae  
Family: Chironomidae  
BIN URI: BOLD:ABA6490

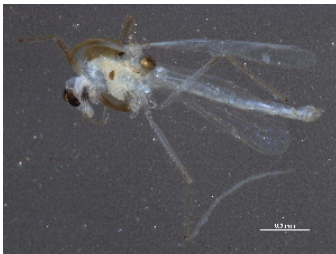

**BIOUG10916-F06 [Lateral]**  
Cladotanytarsus  
Family: Chironomidae  
BIN URI: BOLD:ACM0192

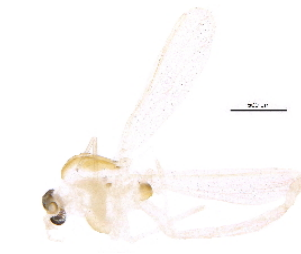

**BIOUG22323-C03 [Lateral]**  
Tanytarsus  
Family: Chironomidae  
BIN URI: BOLD:ACA4847

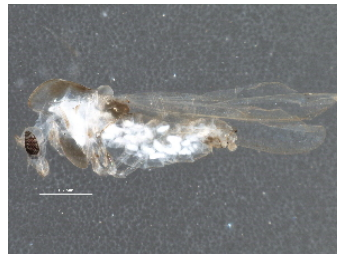

**BIOUG11186-H05 [Lateral]**  
Tanytarsus recurvatus  
Family: Chironomidae  
BIN URI: BOLD:AAC3354

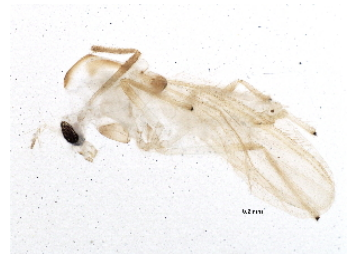

**BIOUG09541-G08 [Lateral]**  
Tanytarsus  
Family: Chironomidae  
BIN URI: BOLD:AAD8854

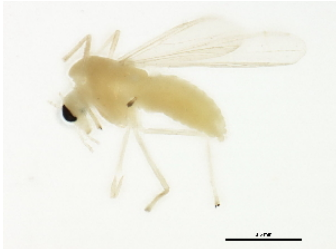

**BIOUG01410-E01 [Lateral]**  
Chironomidae  
Family: Chironomidae  
BIN URI: BOLD:ACM2385

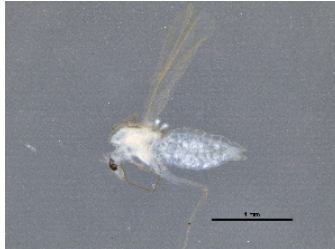

**BIOUG22330-G12 [Lateral]**  
Chironomidae  
Family: Chironomidae  
BIN URI: BOLD:AAL7356

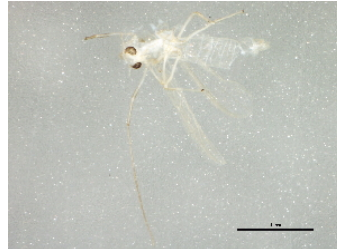

**BIOUG01571-E07 [Lateral]**  
Chironomidae  
Family: Chironomidae  
BIN URI: BOLD:ACU2945

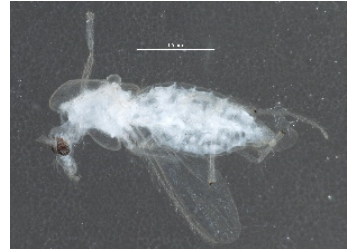

**BIOUG05795-F02 [Lateral]**  
Chironomidae  
Family: Chironomidae  
BIN URI: BOLD:ACU2946

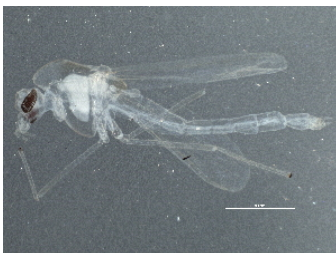

**BIOUG08375-B05 [Lateral]**  
Tanytarsus  
Family: Chironomidae  
BIN URI: BOLD:AAP5870

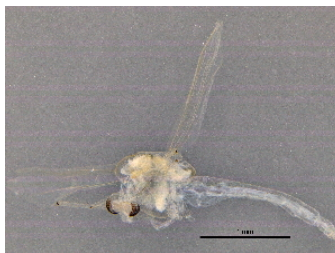

**BIOUG22235-B04 [Lateral]**  
Tanytarsus  
Family: Chironomidae  
BIN URI: BOLD:ACV4333

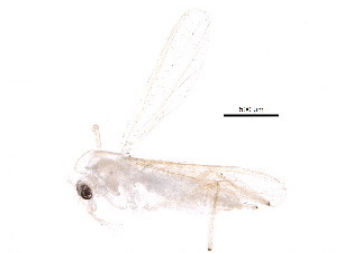

**BIOUG22922-D08 [Lateral]**  
Tanytarsus  
Family: Chironomidae  
BIN URI: BOLD:ACV4943

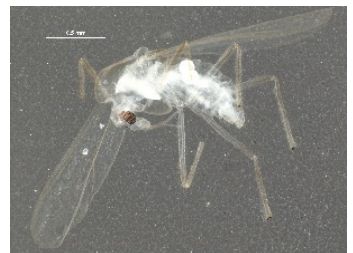

**BIOUG22235-B08 [Lateral]**  
Tanytarsus glabrescens  
Family: Chironomidae  
BIN URI: BOLD:AAD8855

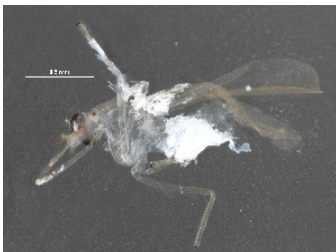

**BIOUG22730-C05 [Lateral]**  
Tanytarsus glabrescens  
Family: Chironomidae  
BIN URI: BOLD:AAD8855

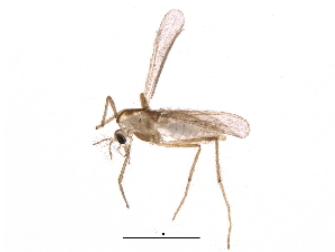

**BIOUG10178-A01 [Lateral]**  
Chironominae  
Family: Chironomidae  
BIN URI: BOLD:ACL4257

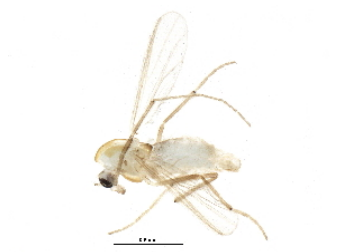

**BIOUG22366-D05 [Lateral]**  
Micropsectra  
Family: Chironomidae  
BIN URI: BOLD:ACV4826

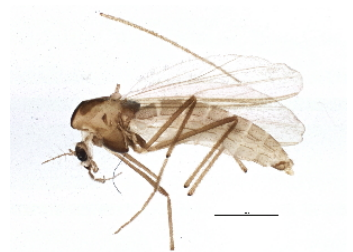

**BIOUG05830-E12 [Lateral]**  
Micropsectra subletteorum  
Family: Chironomidae  
BIN URI: BOLD:AAF7088

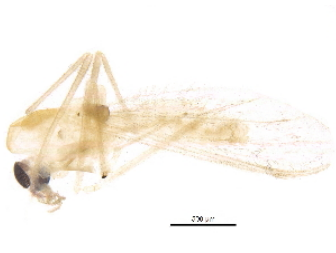

**BIOUG21483-C05 [Lateral]**  
Chironomidae  
Family: Chironomidae  
BIN URI: BOLD:ACA2939

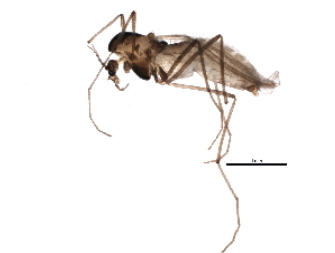

**BIOUG05616-E12 [Lateral]**  
Micropsectra  
Family: Chironomidae  
BIN URI: BOLD:AAN5328

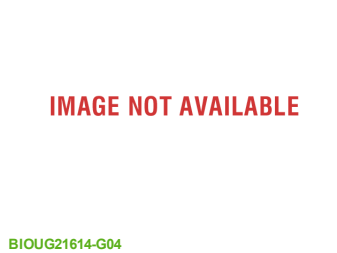

**BIOUG21614-G04**  
Micropsectra nigripila  
Family: Chironomidae

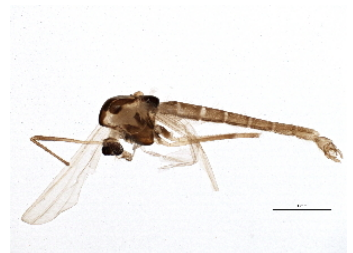

**BIOUG02819-C08 [Lateral]**  
Chironomidae  
Family: Chironomidae  
BIN URI: BOLD:AAQ602



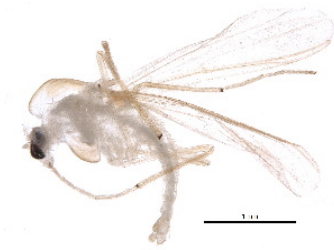

**BIOUG22356-A07 [Lateral]**  
 Tanytarsus  
 Family: Chironomidae  
 BIN URI: BOLD:AAG5467

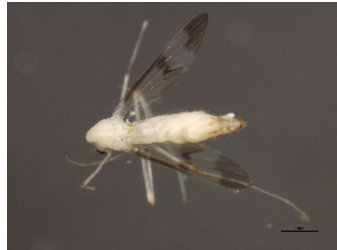

**08BBDIP-1869 [Lateral]**  
 Chironomidae  
 Family: Chironomidae  
 BIN URI: BOLD:AAG5466

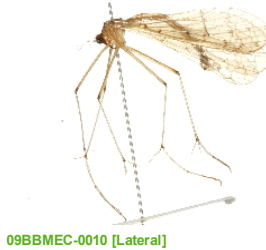

**09BBMEC-0010 [Lateral]**  
 Bittacus strigosus  
 Family: Bittacidae  
 BIN URI: BOLD:AAH3560

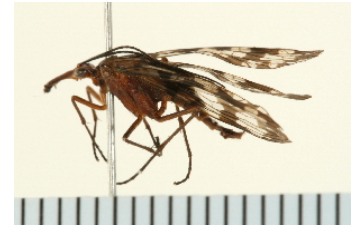

**08BBMEC-005 [Lateral]**  
 Panorpa subfurcata  
 Family: Panorpidae  
 BIN URI: BOLD:ABY6178

**IMAGE NOT AVAILABLE**

**BIOUG24029-C11**  
 Panorpidae  
 Family: Panorpidae

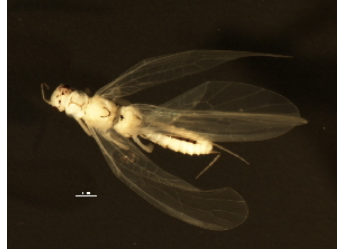

**08BKEPT-194 [Dorsal]**  
 Sweltsa onkos  
 Family: Chloroperlidae  
 BIN URI: BOLD:AAB4130

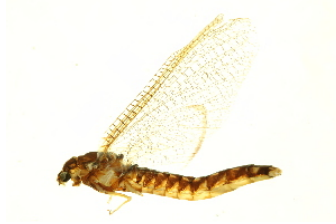

**10BBEPT-0265 [Lateral]**  
 Hexagenia limbata  
 Family: Ephemeridae  
 BIN URI: BOLD:AAA5477

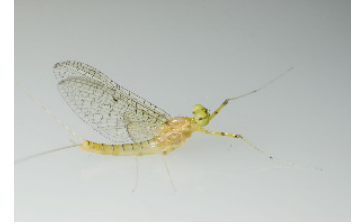

**SWRC-SI\_WRI9\_01 [Lateral]**  
 Stenacron interpunctatum  
 Family: Heptageniidae  
 BIN URI: BOLD:AAA8213

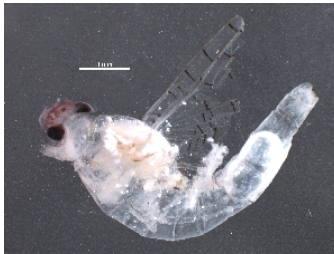

**BIOUG24021-G02 [Lateral]**  
 Maccaffertium  
 Family: Heptageniidae

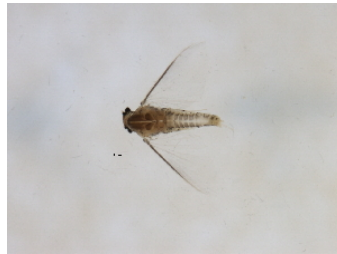

**07ELEPT-388 [Dorsal]**  
 Caenis latipennis  
 Family: Caenidae  
 BIN URI: BOLD:AAI3819

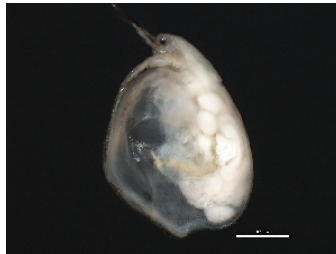

**NJGS-19 [Lateral]**  
 Simocephalus cf. punctatus sp. 1 NA  
 Family: Daphniidae  
 BIN URI: BOLD:AAH3195

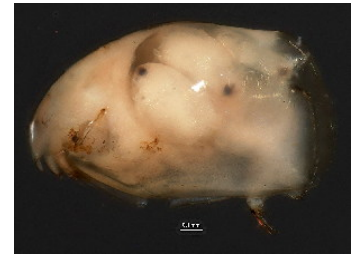

**11AlgonqNJ0117 [Lateral]**  
 Eurycerus longirostris  
 Family: Euryceridae  
 BIN URI: BOLD:AAC8115

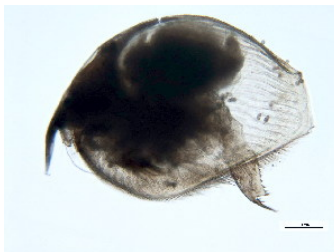

**10BBPLANK-0155 [Lateral]**  
 Chydoridae  
 Family: Chydoridae  
 BIN URI: BOLD:AAC9302

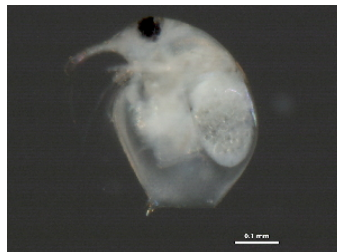

**BIOUG02838-F03 [Lateral]**  
 Branchiopoda  
 BIN URI: BOLD:ACA6834

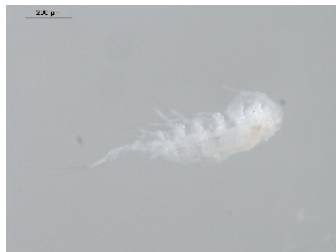

**BIOUG01746-G07 [Lateral]**  
 Maxillopoda  
 BIN URI: BOLD:ACN5861

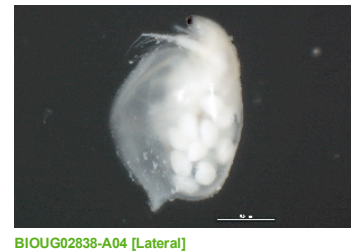

**BIOUG02838-A04 [Lateral]**  
 Branchiopoda  
 BIN URI: BOLD:ACF0852

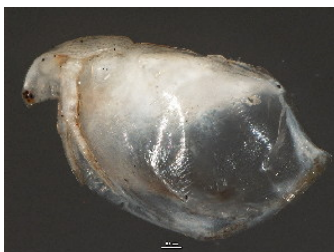

**NJAK-0083 [Lateral]**  
 Simocephalus cf. serrulatus sp. 1NA  
 Family: Daphniidae  
 BIN URI: BOLD:ACF0854

**IMAGE NOT AVAILABLE**

**BIOUG24026-A05**  
 Daphnia  
 Family: Daphniidae

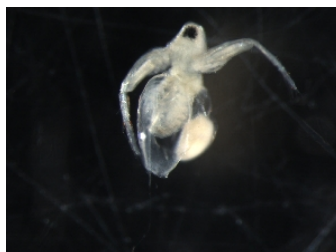

**SJA-0245 [Lateral]**  
 Diaphanosoma sp. 2  
 Family: Sididae  
 BIN URI: BOLD:AAI6310

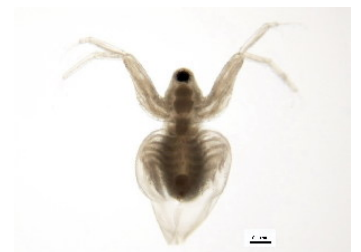

**10BBCRU-0091 [Ventral]**  
 Diaphanosoma  
 Family: Sididae  
 BIN URI: BOLD:AAI6310

IMAGE NOT AVAILABLE

BIOUG24026-B12  
Diaphanosoma  
Family: Sidae

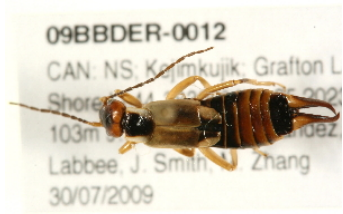

09BBDER-0012 [Dorsal]  
Forficula auricularia-A  
Family: Forficulidae  
BIN URI: BOLD:AAG9897

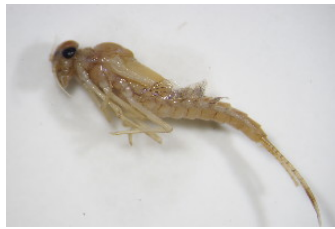

BCZSM\_EPH\_0133 [Lateral]  
Cloeon dipterum  
Family: Baetidae  
BIN URI: BOLD:AAM7076

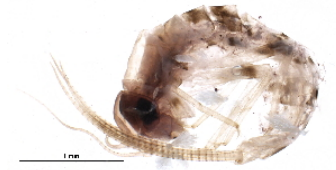

BIOUG21000-F06 [Lateral]  
Ephemeroptera  
BIN URI: BOLD:AAC7439

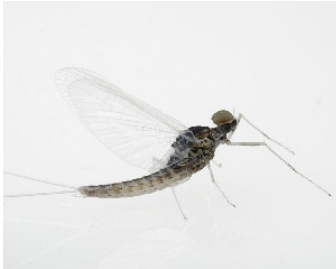

SWRC-Cf\_M1\_02 [Lateral]  
Callibaetis fluctuans  
Family: Baetidae  
BIN URI: BOLD:AAD5425

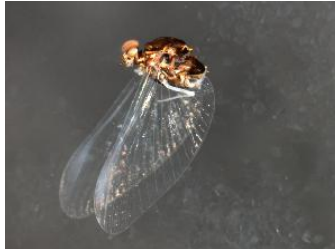

07PROBE-2257 [Lateral]  
Acerpenna sp.JMW1  
Family: Baetidae  
BIN URI: BOLD:AAC3979

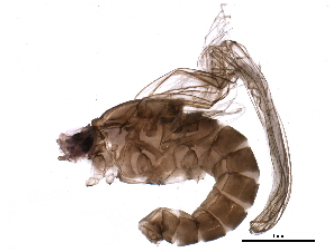

BIOUG16068-C08 [Lateral]  
Baetis intercalaris  
Family: Baetidae  
BIN URI: BOLD:AAM2026

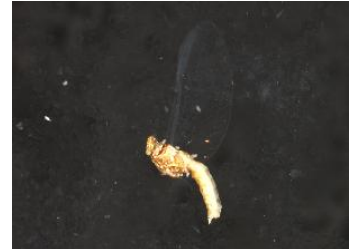

07PROBE-07104 [Lateral]  
Iswaen anoka  
Family: Baetidae  
BIN URI: BOLD:AAA9021

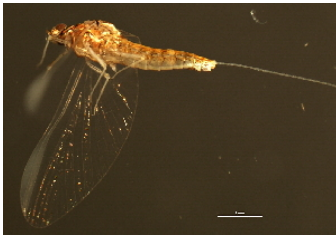

09ELEPT-019 [Lateral]  
Iswaen anoka  
Family: Baetidae  
BIN URI: BOLD:ACE7903

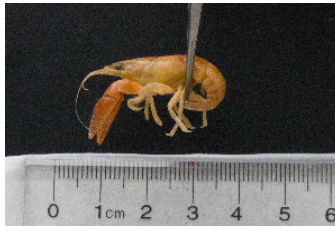

kmMR1 [Lateral full body]  
Orconectes propinquus  
Family: Cambaridae  
BIN URI: BOLD:AAE4928

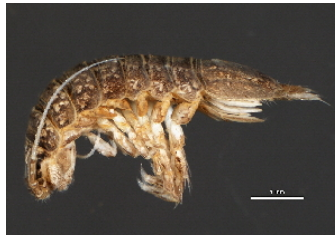

NJGS-8 [Lateral]  
Caecidotea sp.  
Family: Aseellidae  
BIN URI: BOLD:AAC7342

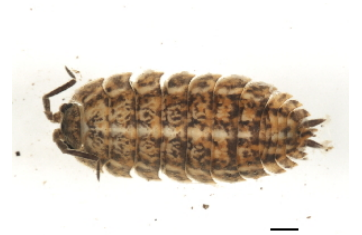

09ISOP-0001 [Dorsal]  
Isopoda  
BIN URI: BOLD:AAH4100

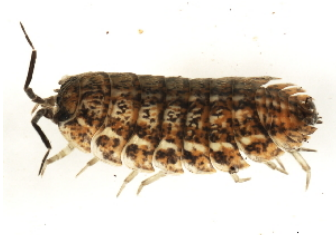

09BBIUS-0006 [Dorsal]  
Isopoda  
BIN URI: BOLD:AAH4102

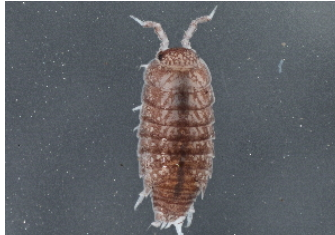

BIOUG08059-B08 [Dorsal]  
Trichoniscus pusillus  
Family: Trichoniscidae  
BIN URI: BOLD:AAN7523

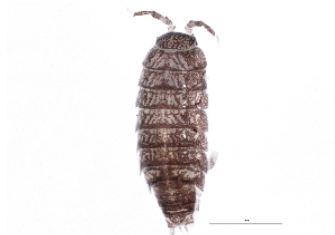

BIOUG08049-D12 [Dorsal]  
Hyloniscus riparius  
Family: Trichoniscidae  
BIN URI: BOLD:AAV6495

IMAGE NOT AVAILABLE

BIOUG24026-G05  
Maxillopoda

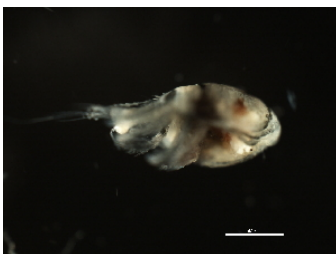

08BBCRU-053 [Lateral]  
Cyclopoida  
BIN URI: BOLD:AAG9779

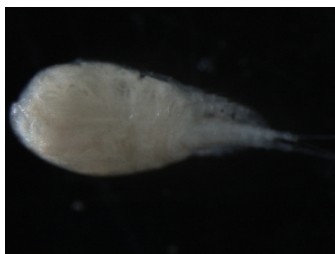

SJA-0049 [Lateral]  
Cyclopoida  
BIN URI: BOLD:AAG9780

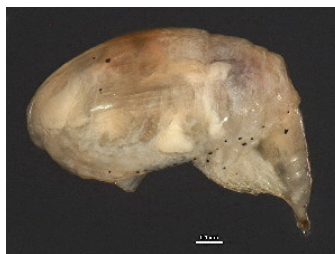

NJAK-0025 [Lateral]  
Cyclopoida  
BIN URI: BOLD:AAG9778

IMAGE NOT AVAILABLE

BIOUG24026-G12  
Maxillopoda

IMAGE NOT AVAILABLE

BIOUG24026-D03  
Cyclopidae  
Family: Cyclopidae

IMAGE NOT AVAILABLE

BIOUG24026-E09  
Maxillopoda

IMAGE NOT AVAILABLE

BIOUG24026-F07  
Maxillopoda

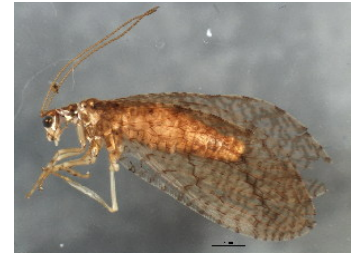

BIOUG00864-E07 [Lateral]  
Micromus posticus  
Family: Hemerobiidae  
BIN URI: BOLD:AAG0906

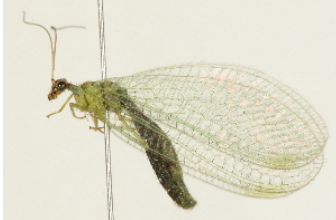

09BBNEU-0093 [Lateral]  
Chrysopa oculata  
Family: Chrysopidae  
BIN URI: BOLD:AAG2017

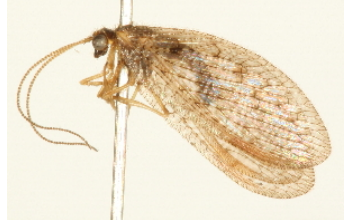

HLC-17470 [Lateral]  
Hemerobius stigma  
Family: Hemerobiidae  
BIN URI: BOLD:AAG0891

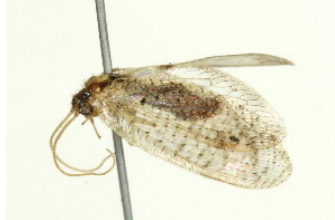

TDWG-0213 [Lateral]  
Hemerobius humulinus  
Family: Hemerobiidae  
BIN URI: BOLD:AAG0892

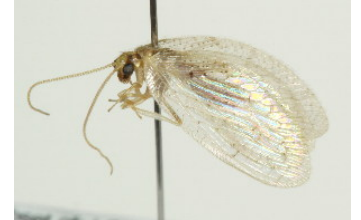

TDWG-0217 [Lateral]  
Hemerobius humulinus  
Family: Hemerobiidae  
BIN URI: BOLD:AA7492

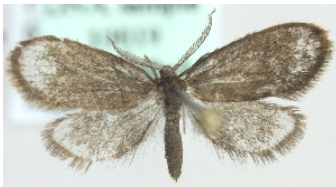

MM10019 [Dorsal]  
Psyche casta  
Family: Psychidae  
BIN URI: BOLD:ACL8669

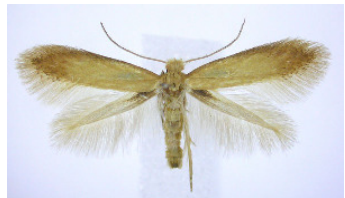

jflandry0213 [Dorsal]  
Coptotriche citrinipennella  
Family: Tischeriidae  
BIN URI: BOLD:AAC7129

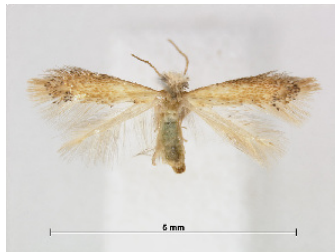

RMNH.INS.24711 [Dorsal]  
Coptotriche badiella  
Family: Tischeriidae  
BIN URI: BOLD:ACU4456

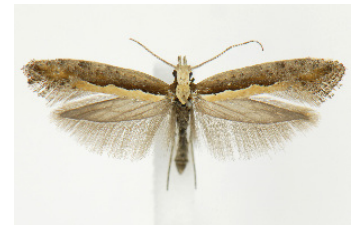

CNCLEP00040356 [Dorsal]  
Plutella xylostella  
Family: Plutellidae  
BIN URI: BOLD:AAA1513

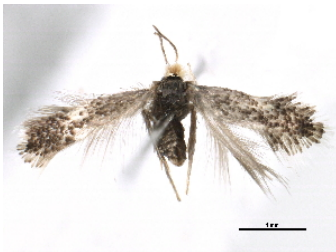

BIOUG16764-G09 [Dorsal]  
Ectoedemia argyropeza  
Family: Nepticulidae  
BIN URI: BOLD:AAC1036

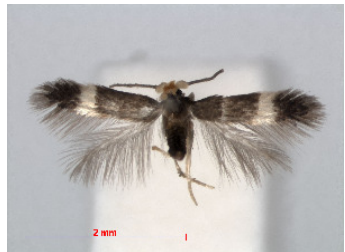

RMNH.INS.24430 [Dorsal]  
Stigmella microtheriella  
Family: Nepticulidae  
BIN URI: BOLD:AAI0007

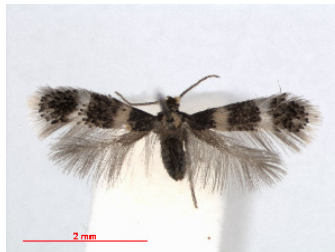

RMNH.INS.24410 [Dorsal]  
Stigmella rhamnocola  
Family: Nepticulidae  
BIN URI: BOLD:AAU7678

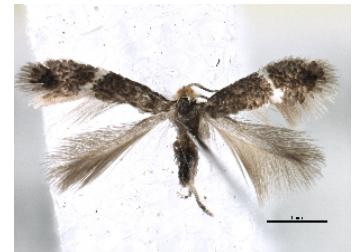

BIOUG16764-B12 [Dorsal]  
Stigmella  
Family: Nepticulidae  
BIN URI: BOLD:AAI6169

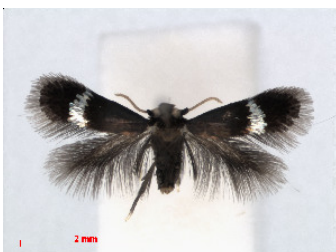

RMNH.INS.24407 [Dorsal]  
Stigmella betula\_usa  
Family: Nepticulidae  
BIN URI: BOLD:ACG9017

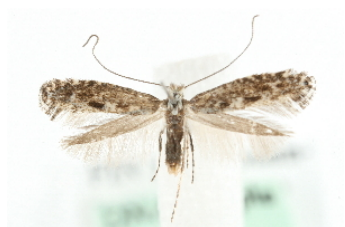

MM06299 [Dorsal]  
Paromix betulae  
Family: Gracillariidae  
BIN URI: BOLD:AAE3418

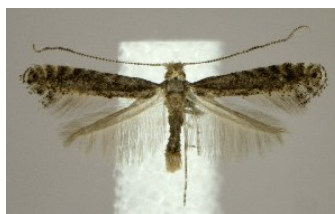

DNA-ATBI-3415 [Dorsal]  
Paromix sp.  
Family: Gracillariidae  
BIN URI: BOLD:AAF8198

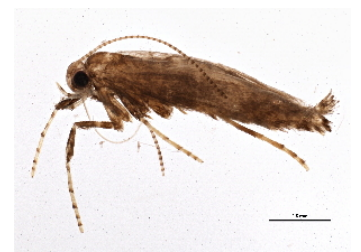

BIOUG02618-E11 [Lateral]  
Paromix  
Family: Gracillariidae  
BIN URI: BOLD:AAG1144

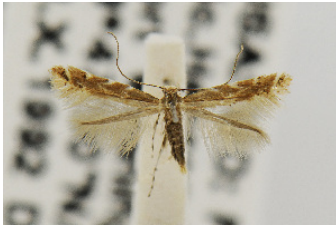

**USNMENT00656251 [Dorsal]**  
*Cremastobomycia solidaginis*  
 Family: Gracillariidae  
 BIN URI: BOLD: AAC4262

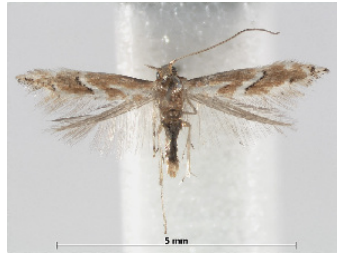

**RMNH.INS.552275 [Dorsal]**  
*Cameraria saccharella*  
 Family: Gracillariidae  
 BIN URI: BOLD: AAH4493

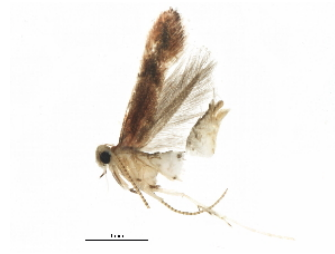

**BIOUG01903-C12 [Lateral]**  
*Cameraria*  
 Family: Gracillariidae  
 BIN URI: BOLD: ABX0017

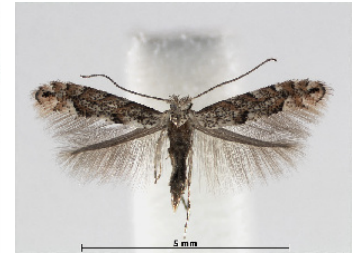

**RMNH.INS.552266 [Dorsal]**  
*Phyllonorycter salicifoliella*  
 Family: Gracillariidae  
 BIN URI: BOLD: AAD4915

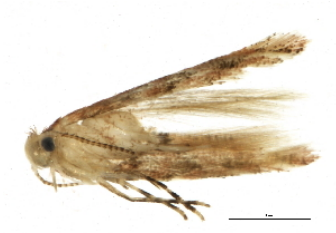

**BIOUG01573-D04 [Lateral]**  
*Phyllonorycter*  
 Family: Gracillariidae  
 BIN URI: BOLD: AAI5995

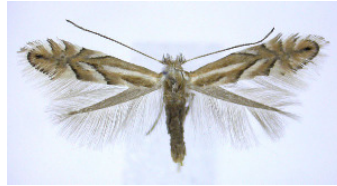

**jflandry0188 [Dorsal]**  
*Phyllonorycter ostryaefoliella*  
 Family: Gracillariidae  
 BIN URI: BOLD: AAD7999

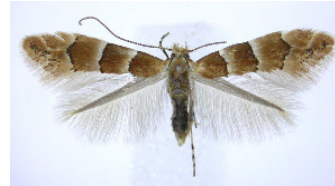

**jflandry0201 [Dorsal]**  
*Phyllonorycter tritaenianella*  
 Family: Gracillariidae  
 BIN URI: BOLD: AAF6577

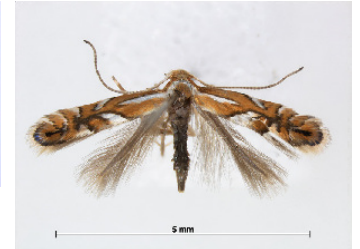

**RMNH.INS.544278 [Dorsal]**  
*Phyllonorycter propinquella*  
 Family: Gracillariidae  
 BIN URI: BOLD: AAH4497

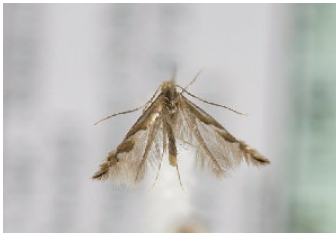

**TLMF Lep 15507 [Dorsal]**  
*Phyllonorycter maestingella*  
 Family: Gracillariidae  
 BIN URI: BOLD: AAL6962

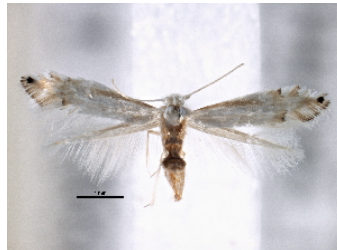

**CNCLEP00101453 [Dorsal]**  
*Phyllonorycter trinotella*  
 Family: Gracillariidae  
 BIN URI: BOLD: AAG1128

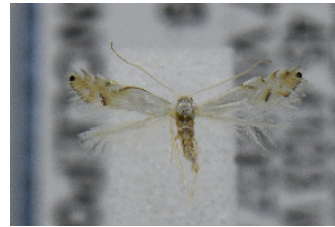

**CNCLEP00038402 [Dorsal]**  
*Phyllonorycter clemensella*  
 Family: Gracillariidae  
 BIN URI: BOLD: AAN8981

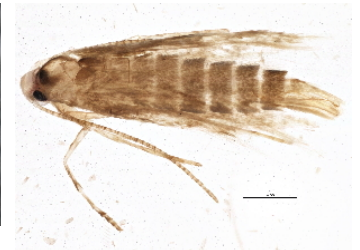

**BIOUG06046-F06 [Lateral]**  
*Phyllonorycter*  
 Family: Gracillariidae  
 BIN URI: BOLD: ACB9323

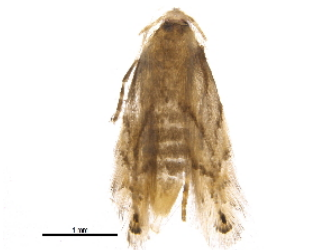

**BIOUG22296-A03 [Dorsal]**  
*Phyllonorycter*  
 Family: Gracillariidae  
 BIN URI: BOLD: ACV4141

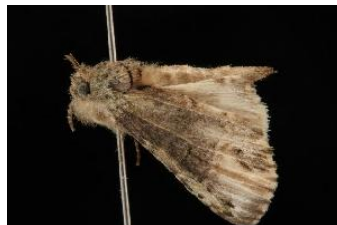

**04HBL002088 [Lateral]**  
*Schizura unicomis*  
 Family: Notodontidae  
 BIN URI: BOLD: AAA3873

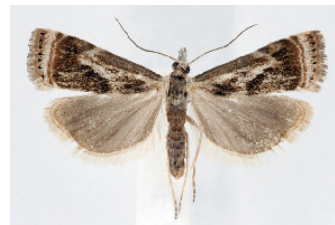

**jflandry1182 [Dorsal]**  
*Microcrambus elegans*  
 Family: Crambidae  
 BIN URI: BOLD: AAA4893

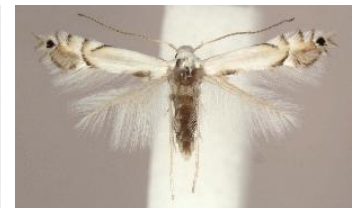

**CNCLEP00027712 [Dorsal]**  
*Phyllocnistis vitigenella*  
 Family: Gracillariidae  
 BIN URI: BOLD: AAI3014

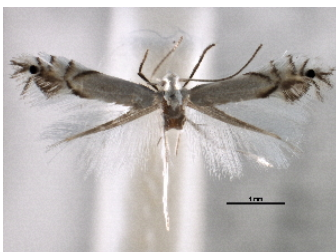

**CNCLEP00101458 [Dorsal]**  
*Phyllocnistis ampelopsiella*  
 Family: Gracillariidae  
 BIN URI: BOLD: AAI3015

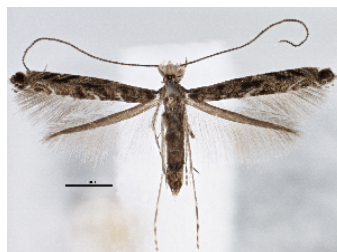

**CNCLEP00006758 [Dorsal]**  
*Neurobathra strigifinitella*  
 Family: Gracillariidae  
 BIN URI: BOLD: AAR7014

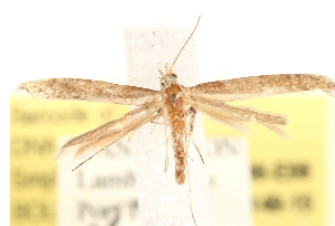

**BIOUG20646-E06 [Dorsal]**  
 Gracillariidae  
 Family: Gracillariidae  
 BIN URI: BOLD: AAE7347

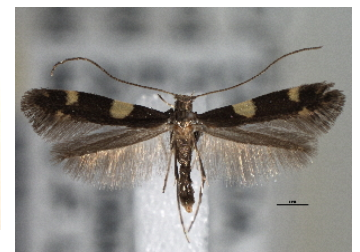

**CNCLEP00101422 [Dorsal]**  
*Caloptilia canadensisella*  
 Family: Gracillariidae  
 BIN URI: BOLD: AAE7388

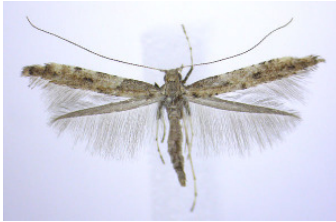

**jflandry0207 [Dorsal]**  
*Caloptilia ostryaeella*  
 Family: Gracillariidae  
 BIN URI: BOLD: AAC7941

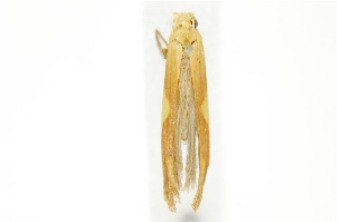

**CNCLEP00035818 [Dorsal]**  
*Caloptilia packardella*  
 Family: Gracillariidae  
 BIN URI: BOLD: AAD2590

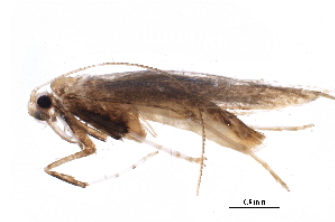

**BIOUG22575-A03 [Lateral]**  
*Caloptilia*  
 Family: Gracillariidae  
 BIN URI: BOLD: ABW2631

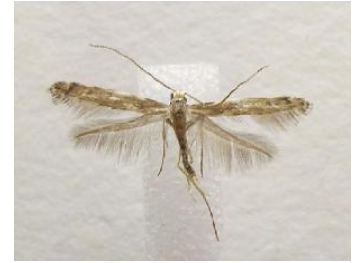

**AC005127 [Dorsal]**  
*Acrocercops astericola*  
 Family: Gracillariidae  
 BIN URI: BOLD: AAD3996

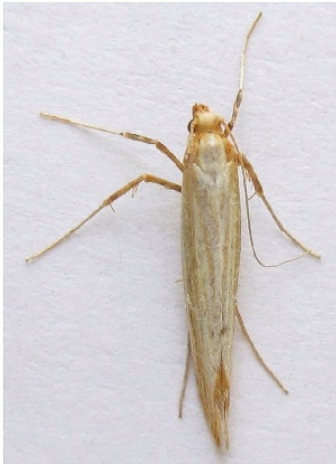

**BIOUG06714-C01 [Dorsal]**  
*Caloptilia murtfeldtella*  
 Family: Gracillariidae  
 BIN URI: BOLD: AAE7367

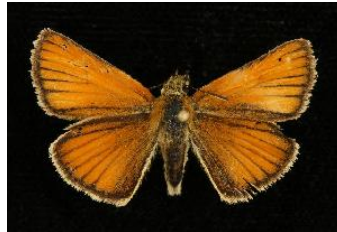

**2006-ONT-1468 [Dorsal]**  
*Thymelicus lineola*  
 Family: Hesperidae  
 BIN URI: BOLD: AAA6759

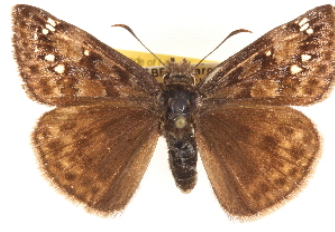

**BIOUG10890-A12 [Dorsal]**  
*Erynnis juvenalis*  
 Family: Hesperidae  
 BIN URI: BOLD: AAC6872

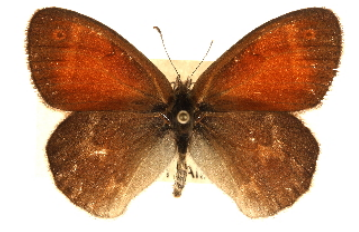

**BIOUG10887-H10 [Dorsal]**  
*Coenonympha tullia*  
 Family: Nymphalidae  
 BIN URI: BOLD: AAA3561

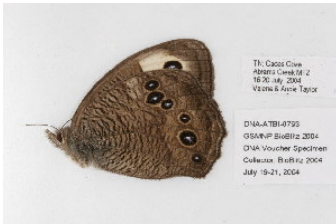

**DNA-ATBI-0793 [Lateral]**  
*Cercyonis pegala*  
 Family: Nymphalidae  
 BIN URI: BOLD: AAA7277

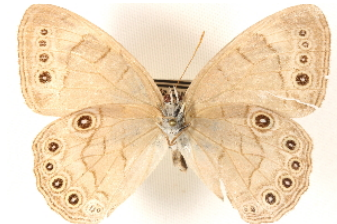

**BIOUG15631-E10 [Ventral]**  
*Lethe appalachia*  
 Family: Nymphalidae  
 BIN URI: BOLD: AAB4176

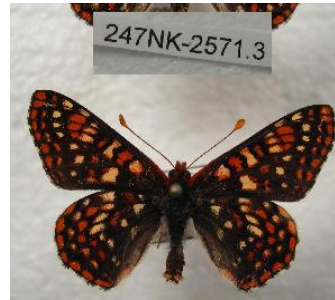

**247NK-2571.3 [Dorsal]**  
*Euphydryas anicia*  
 Family: Nymphalidae  
 BIN URI: BOLD: AAA3686

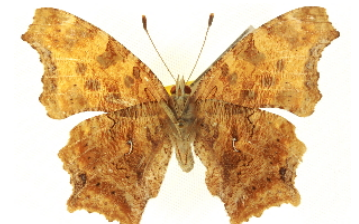

**CCDB-24273-H02 [Ventral]**  
*Polygonia comma*  
 Family: Nymphalidae  
 BIN URI: BOLD: ABX6422

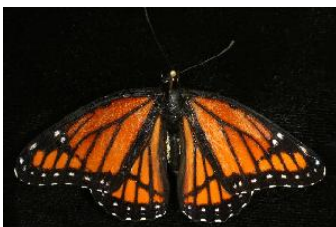

**2006-ONT-1119 [Dorsal]**  
*Limenitis archippus*  
 Family: Nymphalidae  
 BIN URI: BOLD: ABZ6035

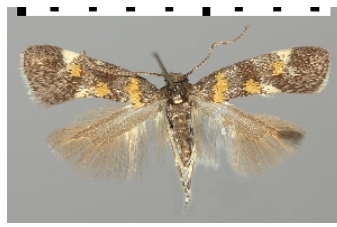

**TLMF Lep 07030 [Dorsal]**  
*Chrysoesthia sexguttella*  
 Family: Gelechiidae  
 BIN URI: BOLD: AAD8505

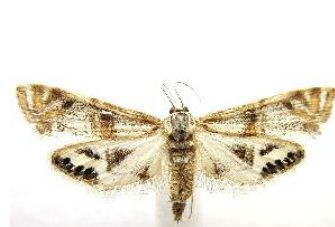

**MDH002546 [Dorsal]**  
*Petrophila bifascialis*  
 Family: Crambidae  
 BIN URI: BOLD: AAC6453

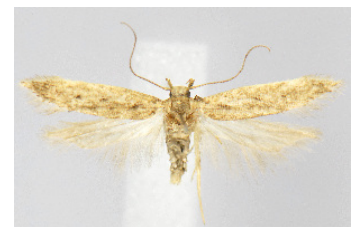

**CNCLEP00040449 [Dorsal]**  
*Bryotropha*  
 Family: Gelechiidae  
 BIN URI: BOLD: AAH4276

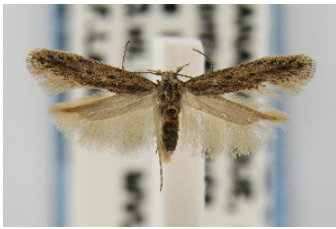

**CNCLEP00067530 [Dorsal]**  
*Scrobipalpa sacculicola*  
 Family: Gelechiidae  
 BIN URI: BOLD:ABY8834

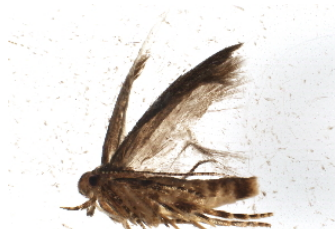

**BIOUG03514-C03 [Lateral]**  
*Scrobipalpa physaliella*  
 Family: Gelechiidae  
 BIN URI: BOLD:ACB8750

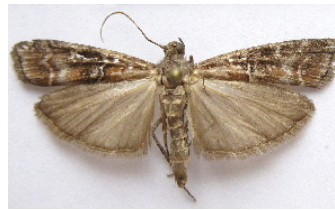

**BIOUG00848-E08 [Dorsal]**  
*Dioryctria banksiella*  
 Family: Pyralidae  
 BIN URI: BOLD:AAB4478

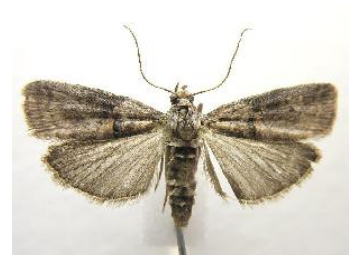

**MDH000333 [Dorsal]**  
*Acrobasis indigenella*  
 Family: Pyralidae  
 BIN URI: BOLD:AAB5713

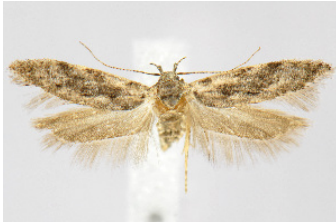

**CNCLEP00040953 [Dorsal]**  
*Xenolechia ontariensis*  
 Family: Gelechiidae  
 BIN URI: BOLD:AAC6357

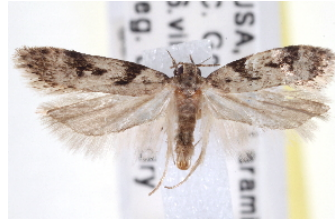

**USNM ENT 00018022 [Dorsal]**  
*Chionodes fondella*  
 Family: Gelechiidae  
 BIN URI: BOLD:ABA4737

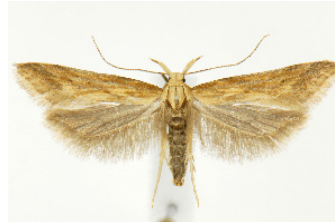

**CNCLEP00040963 [Dorsal]**  
*Metzneria lappella*  
 Family: Gelechiidae  
 BIN URI: BOLD:AAB4321

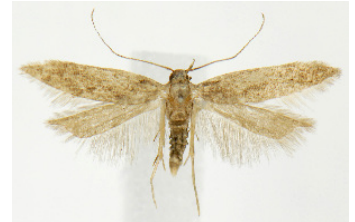

**CNCLEP00040282 [Dorsal]**  
*Monochroa*  
 Family: Gelechiidae  
 BIN URI: BOLD:AAG0014

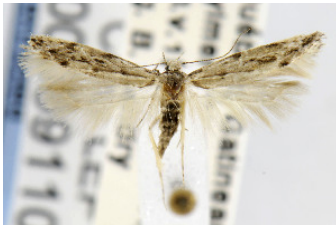

**CNCLEP00099110 [Dorsal]**  
*Sinoe chambersi*  
 Family: Gelechiidae  
 BIN URI: BOLD:ACF2217

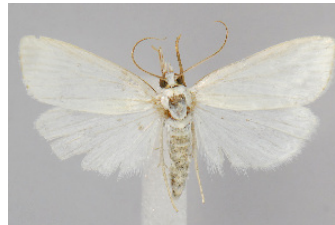

**CNCLEP00040373 [Dorsal]**  
*Urola nivalis*  
 Family: Crambidae  
 BIN URI: BOLD:AAA8678

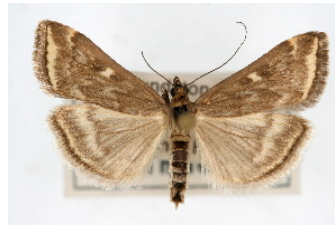

**CNCLEP00074393 [Dorsal]**  
*Loxostege sticticalis*  
 Family: Crambidae  
 BIN URI: BOLD:AAB4167

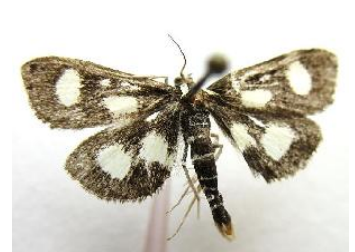

**MDH002886 [Dorsal]**  
*Anania funebris*  
 Family: Crambidae  
 BIN URI: BOLD:AAB4181

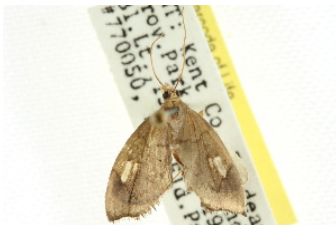

**ROMPYR00001 [Dorsal]**  
*Perispasta caeculalis*  
 Family: Crambidae  
 BIN URI: BOLD:AAC0745

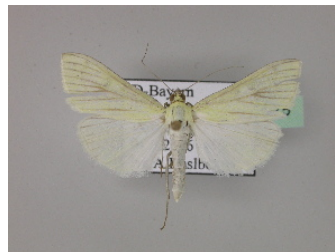

**BC ZSM Lep 22975 [Dorsal]**  
*Sitochroa palealis*  
 Family: Crambidae  
 BIN URI: BOLD:AAD7889

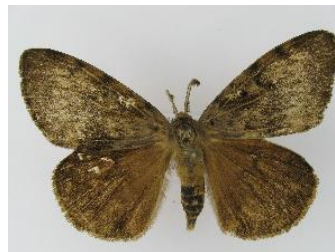

**BC ZSM Lep 13352 [Dorsal]**  
*Lymantria*  
 Family: Erebidae  
 BIN URI: BOLD:AAA2052

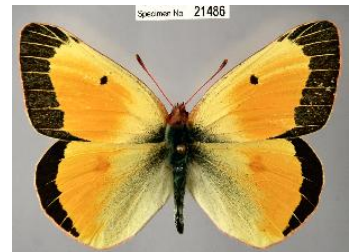

**CSG21486 NE BC [Whole Specimen]**  
*Colias christina*  
 Family: Pieridae  
 BIN URI: BOLD:AAA3447

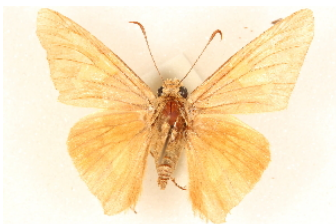

**CCDB-24279-B09 [Dorsal]**  
*Epargyreus clarus*  
 Family: Hesperidae  
 BIN URI: BOLD:ABY4698

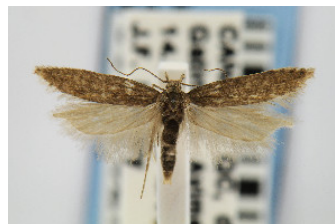

**CNCLEP00067527 [Dorsal]**  
*Scrobipalpa acuminatella*  
 Family: Gelechiidae  
 BIN URI: BOLD:AAC1644

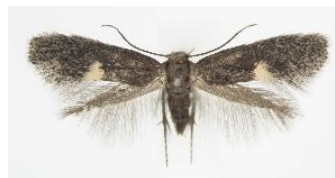

**CNCLEP00027823 [Dorsal]**  
*Perittia herrichiella*  
 Family: Elachistidae  
 BIN URI: BOLD:AAC8613

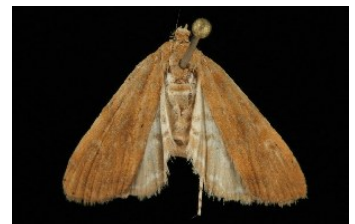

**2005-ONT-1724 [Dorsal]**  
*Elophila gyralis*  
 Family: Crambidae  
 BIN URI: BOLD:AAA9838

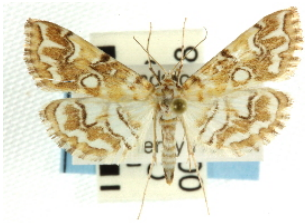

**CNCLEP00087658 [Dorsal]**  
*Etophila icciusalis*  
 Family: Crambidae  
 BIN URI: BOLD: AAB0713

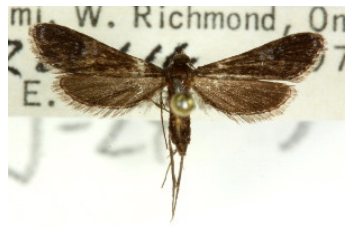

**CNCLEP00087681 [Dorsal]**  
*Etophila tinealis*  
 Family: Crambidae  
 BIN URI: BOLD: AAD0306

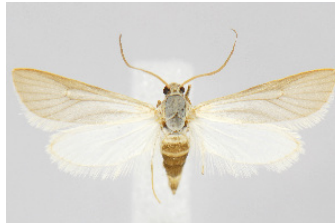

**CNCLEP00040982 [Dorsal]**  
*Acentria ephemera*  
 Family: Crambidae  
 BIN URI: BOLD: AAA8932

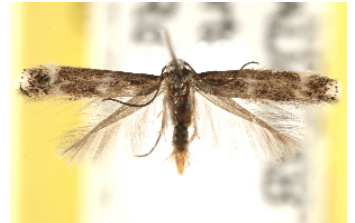

**CCDB-23267-A01 [Dorsal]**  
 Lepidoptera  
 BIN URI: BOLD: AAD9052

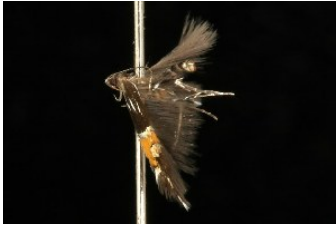

**2005-ONT-2099 [Lateral]**  
*Cosmopterix montisella*  
 Family: Cosmopterigidae  
 BIN URI: BOLD: AAH4285

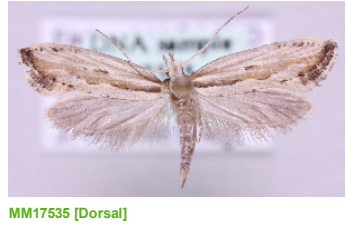

**MM17535 [Dorsal]**  
*Plutella porrectella*  
 Family: Plutellidae  
 BIN URI: BOLD: ACG9804

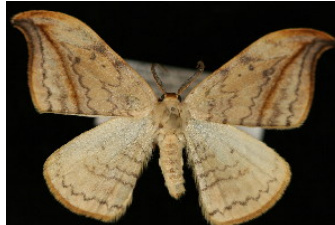

**UBC-2006-0117 [Dorsal]**  
*Drepana arcuata*  
 Family: Drepanidae  
 BIN URI: BOLD: AAA3083

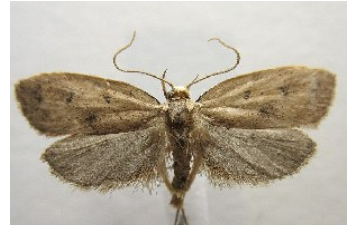

**MDH000245 [Dorsal]**  
*Machimia tentoriferella*  
 Family: Depressariidae  
 BIN URI: BOLD: ABZ1624

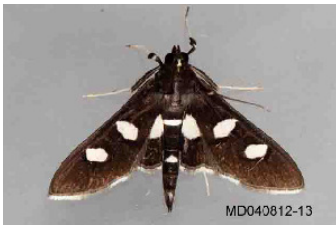

**BIOUG02922-F02 [Dorsal]**  
*Desmia maculalis*  
 Family: Crambidae  
 BIN URI: BOLD: ACE8375

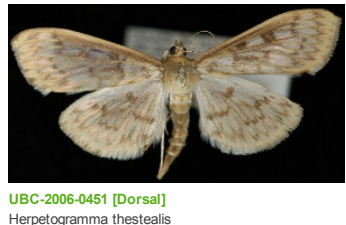

**UBC-2006-0451 [Dorsal]**  
*Herpetogramma thestealis*  
 Family: Crambidae  
 BIN URI: BOLD: AAA2323

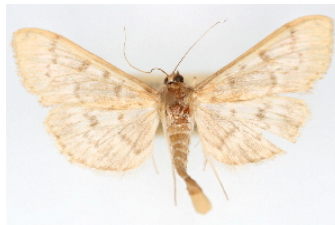

**CNCLEP00075072 [Dorsal]**  
*Herpetogramma aeglealis*  
 Family: Crambidae  
 BIN URI: BOLD: AAA2324

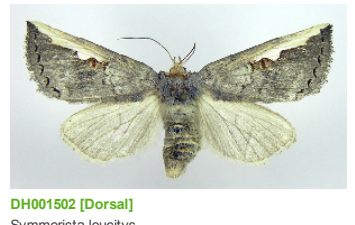

**DH001502 [Dorsal]**  
*Symmerista leucitys*  
 Family: Notodontidae  
 BIN URI: BOLD: AAA7013

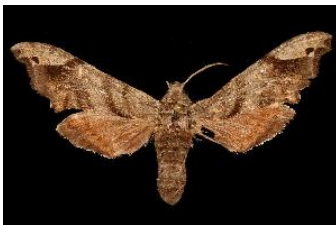

**05-NCCC-794 [Dorsal]**  
*Deidamia inscriptum*  
 Family: Sphingidae  
 BIN URI: BOLD: AAB0001

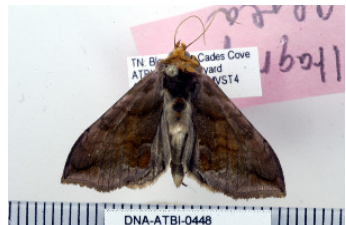

**DNA-ATBI-0448 [Dorsal]**  
*Allagrapha aerea*  
 Family: Noctuidae  
 BIN URI: BOLD: AAB0752

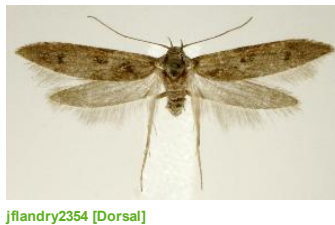

**jflandry2354 [Dorsal]**  
*Asaphocrita busckiella*  
 Family: Blastobasidae  
 BIN URI: BOLD: AAA8938

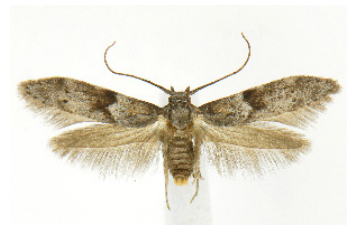

**CNCLEP00040597 [Dorsal]**  
*Blastobasis glandulella*  
 Family: Blastobasidae  
 BIN URI: BOLD: AAB1096

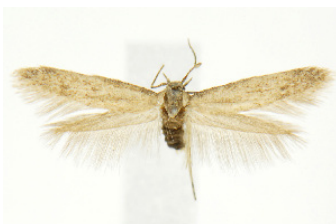

**CNCLEP00040972 [Dorsal]**  
*Teladoma helianthi*  
 Family: Cosmopterigidae  
 BIN URI: BOLD: AAE1519

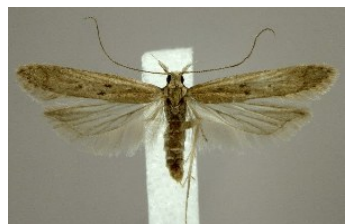

**DNA-ATBI-3376 [Dorsal]**  
*Dichomeris ligulella*  
 Family: Gelechiidae  
 BIN URI: BOLD: AAA8109

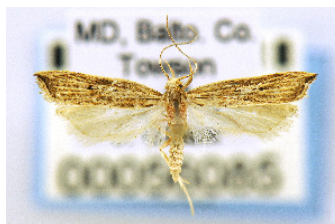

**CNCLEP00056085 [Dorsal]**  
*Helcystogramma hystericella*  
 Family: Gelechiidae  
 BIN URI: BOLD: AAE7016

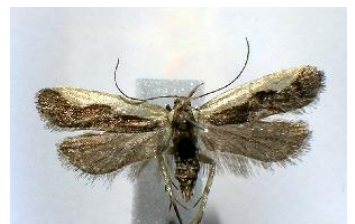

**MDH003197 [Dorsal]**  
*Dichomeris inserrata*  
 Family: Gelechiidae  
 BIN URI: BOLD: AAH4488

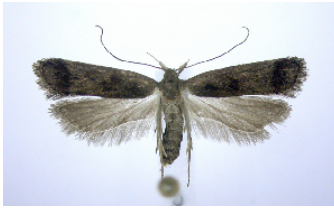

**jflandry0861 [Dorsal]**  
*Dichomeris leuconotella*  
 Family: Gelechiidae  
 BIN URI: BOLD: AAB0651

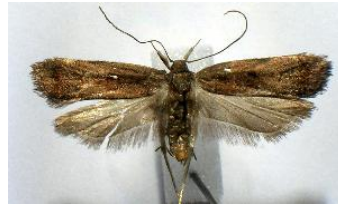

**MDH001252 [Dorsal]**  
*Dichomeris*  
 Family: Gelechiidae  
 BIN URI: BOLD: AAI6258

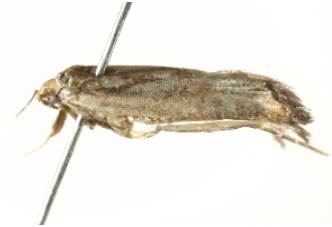

**BIOUG01292-C12 [Lateral]**  
*Dichomeris furia*  
 Family: Gelechiidae  
 BIN URI: BOLD: AAI9560

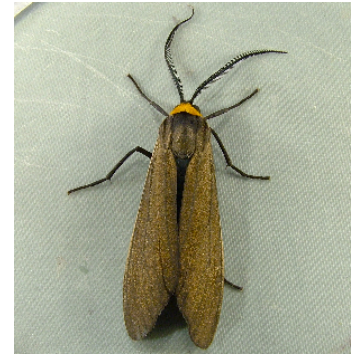

**RWWA-2506 [Dorsal]**  
*Cisseps fulvicollis*  
 Family: Erebiidae  
 BIN URI: BOLD: AAA4200

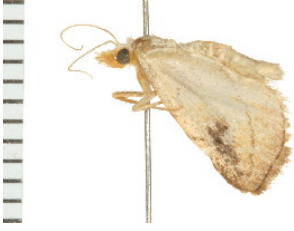

**PPBP-1031 [Lateral]**  
*Rivula propinqualis*  
 Family: Erebiidae  
 BIN URI: BOLD: AAA4282

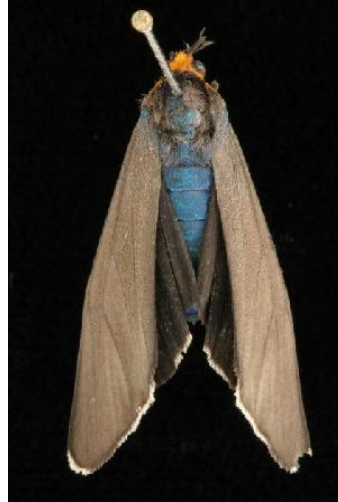

**04HBL005554 [Dorsal]**  
*Ctenucha virginica*  
 Family: Erebiidae  
 BIN URI: BOLD: AAA6017

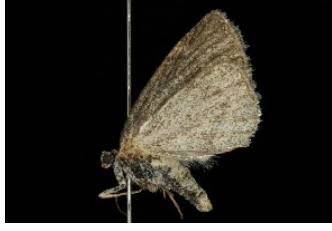

**HLC-20003 [Lateral]**  
*Protodeltote albidula*  
 Family: Noctuidae  
 BIN URI: BOLD: AAA2331

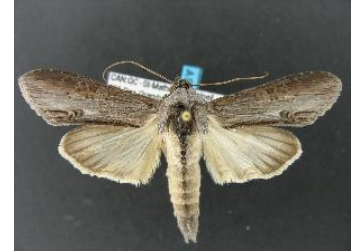

**DH008842 [Dorsal]**  
*Cucullia asteroides*  
 Family: Noctuidae  
 BIN URI: BOLD: AAB9406

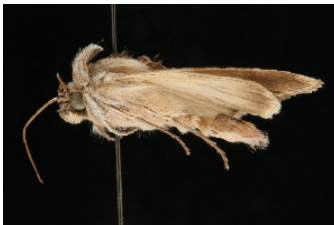

**DNA-ATBI-0643 [Lateral]**  
*Cucullia convexipennis*  
 Family: Noctuidae  
 BIN URI: BOLD: AAD2762

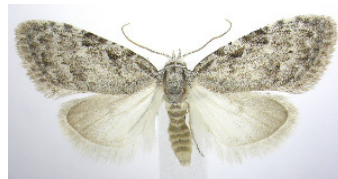

**jflandry0308 [Dorsal]**  
*Nola ovilla*  
 Family: Nolidae  
 BIN URI: BOLD: AAD1810

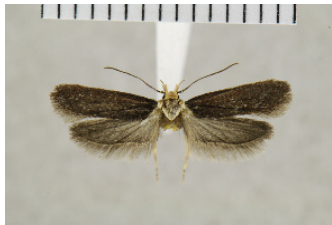

**CNCLEP00097815 [Dorsal]**  
*Depressaria depressana*  
 Family: Depressariidae  
 BIN URI: BOLD: AAE7397

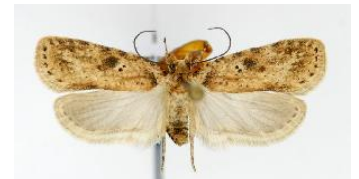

**CNCLEP00020426 [Dorsal]**  
*Agonopterix arenella*  
 Family: Depressariidae  
 BIN URI: BOLD: AAC6982

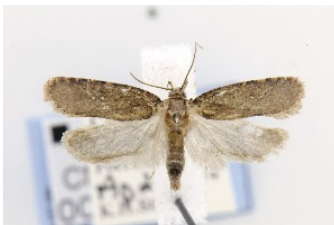

**CNCLEP00121690 [Dorsal]**  
*Agonopterix dimorphella*  
 Family: Depressariidae  
 BIN URI: BOLD: AAC0205

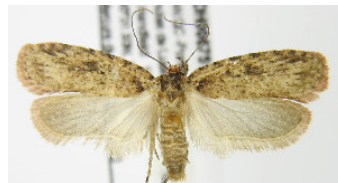

**MDH006751 [Dorsal]**  
*Agonopterix pulvipennella*  
 Family: Depressariidae  
 BIN URI: BOLD: AAA7550

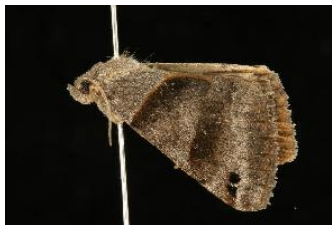

**2006-ONT-1419 [Lateral]**  
*Caenurgina crassiuscula*  
 Family: Noctuidae  
 BIN URI: BOLD: AAA4171

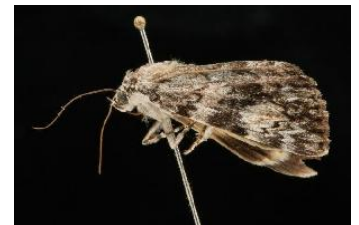

**04HBL002239 [Lateral]**  
*Catocala lineella*  
 Family: Noctuidae  
 BIN URI: BOLD: AAA5644



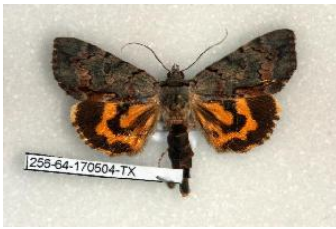

256-64-170504-TX [Dorsal]  
*Catocala grynea*  
 Family: Noctuidae  
 BIN URI: BOLD:AAA9713

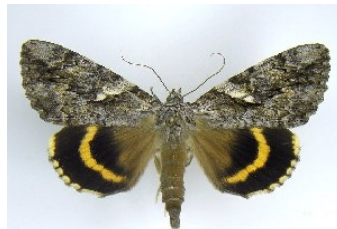

DH010565 [Dorsal]  
*Catocala cerogama*  
 Family: Noctuidae  
 BIN URI: BOLD:AAB3383

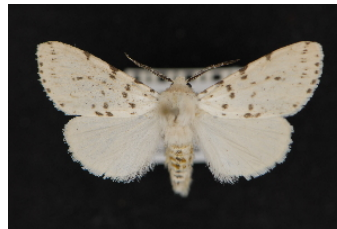

CNCLEP 73783 [Dorsal]  
*Hyphantria cunea*  
 Family: Erebidae  
 BIN URI: BOLD:AAA2435

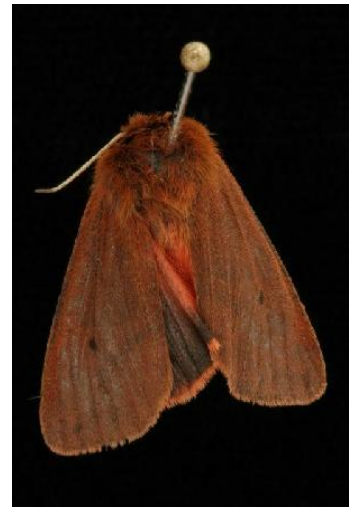

04HBL005035 [Dorsal]  
*Phragmatobia fuliginosa*  
 Family: Erebidae  
 BIN URI: BOLD:AAA6177

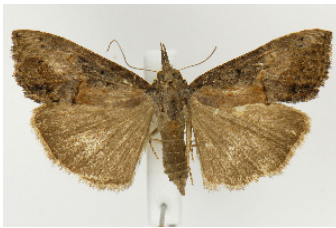

CNCLEP00040357 [Dorsal]  
*Hypena scabra*  
 Family: Erebidae  
 BIN URI: BOLD:AAA4222

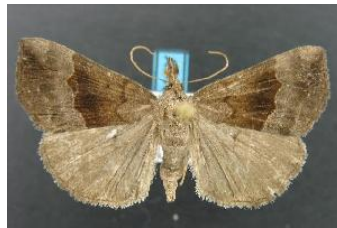

DH012080 [Dorsal]  
*Hypena madefactalis*  
 Family: Erebidae  
 BIN URI: BOLD:ACE2873

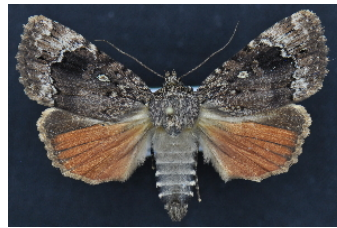

CNCLEP 94242 [Dorsal]  
*Amphipyra pyramidoides*  
 Family: Noctuidae  
 BIN URI: BOLD:AAA8525

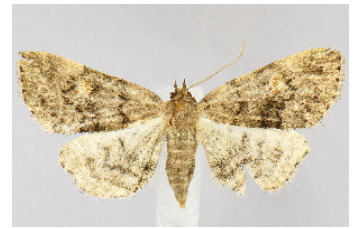

CNCLEP00041073 [Dorsal]  
*Idia concisa*  
 Family: Noctuidae  
 BIN URI: BOLD:AAA2229

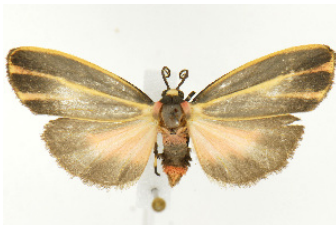

CNCLEP00040847 [Dorsal]  
*Hypoprepia fucosa*  
 Family: Erebidae  
 BIN URI: BOLD:AAA4714

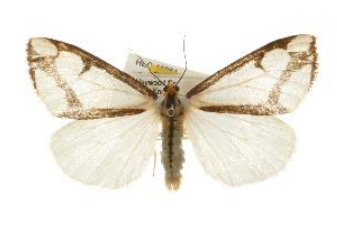

HLC-16961 [Dorsal]  
*Haploa lecontei*  
 Family: Erebidae  
 BIN URI: BOLD:AAA8684

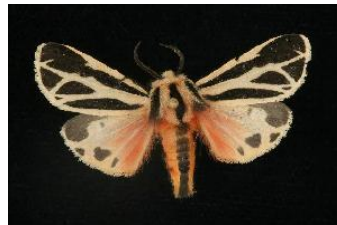

05-NCCC-737 [Dorsal]  
*Apantesis phalerata*  
 Family: Erebidae  
 BIN URI: BOLD:ABY9321

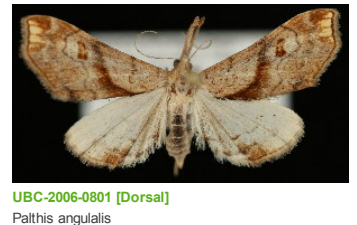

UBC-2006-0801 [Dorsal]  
*Palthis angualis*  
 Family: Noctuidae  
 BIN URI: BOLD:AAA3933

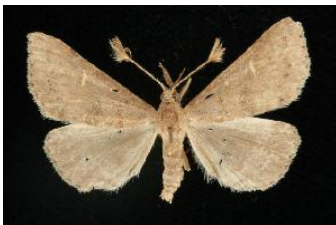

06-NCCC-595 [Dorsal]  
*Renia adspergillus*  
 Family: Noctuidae  
 BIN URI: BOLD:AAA6692

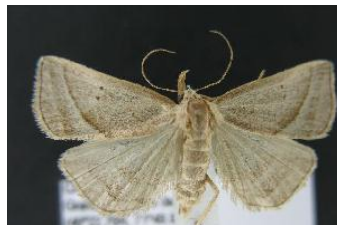

DH013195 [Dorsal]  
*Macrochilo absortptalis*  
 Family: Noctuidae  
 BIN URI: BOLD:AAB3885

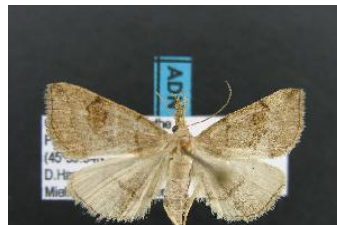

DH012266 [Dorsal]  
*Phalaenostola metonalis*  
 Family: Noctuidae  
 BIN URI: BOLD:ACF3696

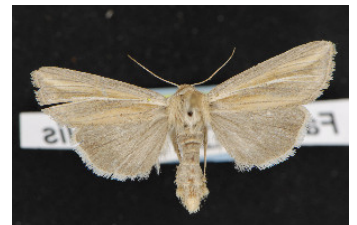

NOC14648 [Dorsal]  
*Dargida terrapictalis*  
 Family: Noctuidae  
 BIN URI: BOLD:AAB3769

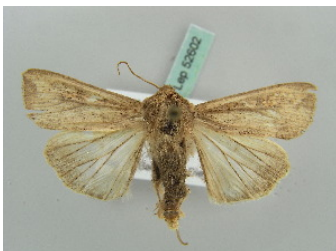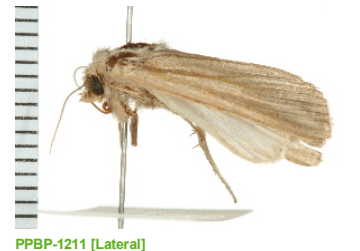

PPBP-1211 [Lateral]

BC ZSM Lep 52602 [Adult]  
Mythimna sequax  
Family: Noctuidae  
BIN URI: BOLD:AAA2482

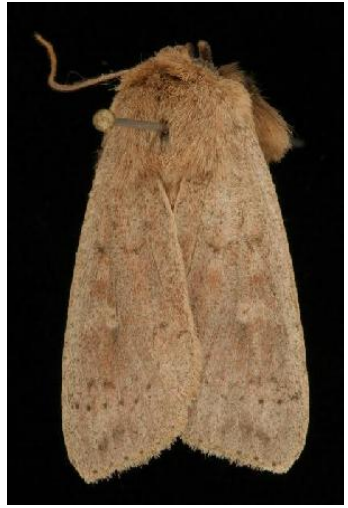

DNA-ATBI-0722 [Dorsal]  
Leucania pseudargyria  
Family: Noctuidae  
BIN URI: BOLD:AAB6246

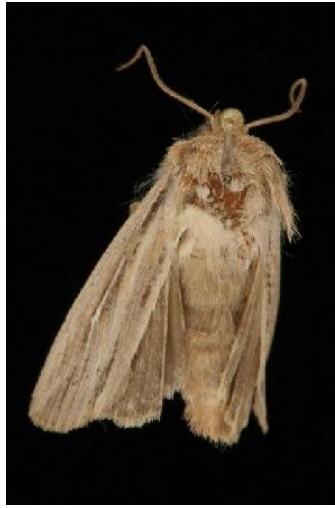

04HBL005175 [Dorsal]  
Leucania commoides  
Family: Noctuidae  
BIN URI: BOLD:AAA8386

Leucania phragmitidicola  
Family: Noctuidae  
BIN URI: BOLD:ABX6101

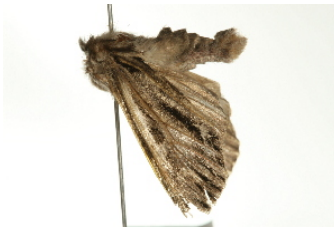

BL239 [Lateral]  
Hyppa xylinoides  
Family: Noctuidae  
BIN URI: BOLD:ABY9574

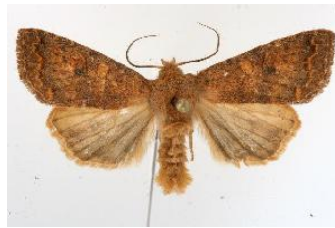

05-NCCC-454 [Dorsal]  
Sunira bicolorago  
Family: Noctuidae  
BIN URI: BOLD:AAA4426

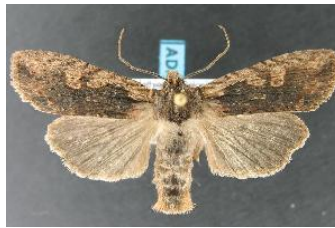

DH013268 [Dorsal]  
Lithophane hemina  
Family: Noctuidae  
BIN URI: BOLD:AAB1070

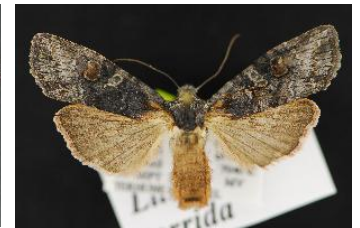

CNCNoctuoidea13876 [Dorsal]  
Lithophane torrida  
Family: Noctuidae  
BIN URI: BOLD:AAB5821

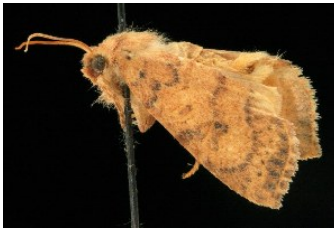

06-JKA-0125 [Lateral]  
Anathix ralla  
Family: Noctuidae  
BIN URI: BOLD:AAC9569

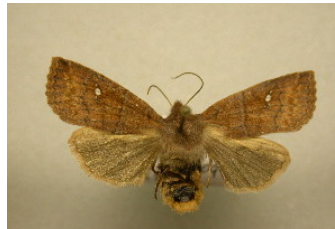

11-NCCC-0013 [Dorsal]  
Eupsilia vinulenta  
Family: Noctuidae  
BIN URI: BOLD:AAB4640

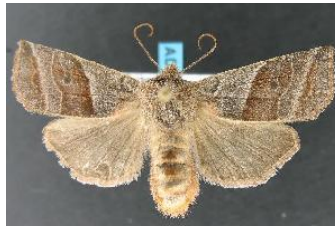

DH013349 [Dorsal]  
Eupsilia devia  
Family: Noctuidae  
BIN URI: BOLD:AAD9847

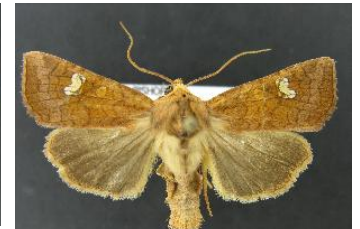

DH006295 [Dorsal]  
Amphipoea americana  
Family: Noctuidae  
BIN URI: BOLD:AAC0644

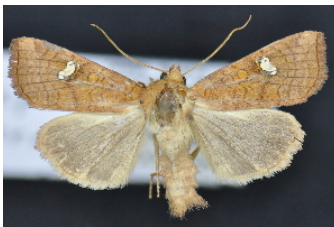

CNCLP 92351 [Dorsal]  
Amphipoea interoceanica  
Family: Noctuidae  
BIN URI: BOLD:ABZ0147

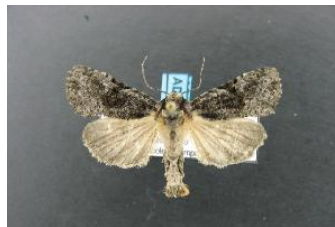

DH011988 [Dorsal]  
Oligia modica  
Family: Noctuidae  
BIN URI: BOLD:ABZ2233

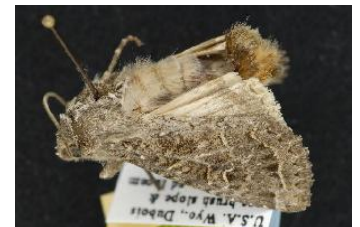

CNCNoctuoidea12311 [Lateral]  
Apamea devastator  
Family: Noctuidae  
BIN URI: BOLD:ABY5257

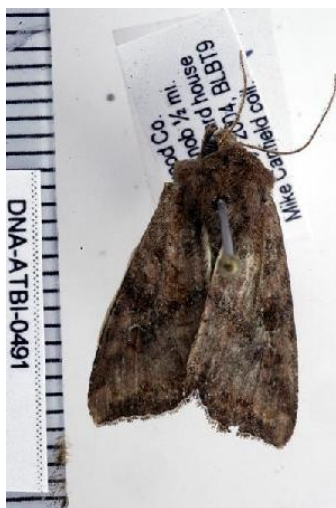

**DNA-ATBI-0491 [Dorsal]**  
*Loscopia velata*  
Family: Noctuidae  
BIN URI: BOLD:AAB5969

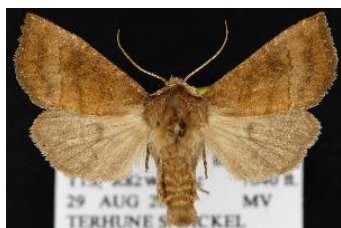

**CNCNoctuioidea12932 [Dorsal]**  
*Papaipema nelita*  
Family: Noctuidae  
BIN URI: BOLD:AAB8711

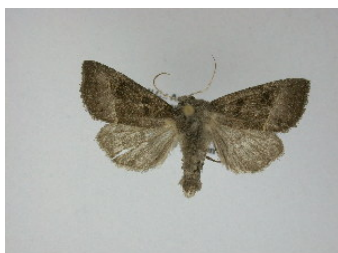

**14-NCCC-660 [Dorsal]**  
*Papaipema nebris*  
Family: Noctuidae  
BIN URI: BOLD:ACF1624

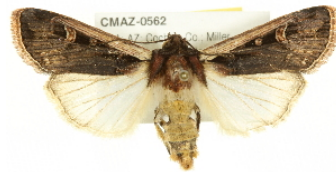

**CMAZ-0562 [Dorsal]**  
*Striacosta albicosta*  
Family: Noctuidae  
BIN URI: BOLD:AAF3338

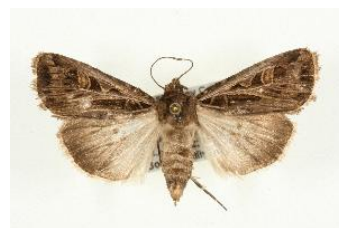

**07-NCNW-0193 [Dorsal]**  
*Feltia jaculifera*  
Family: Noctuidae  
BIN URI: BOLD:AAA3351

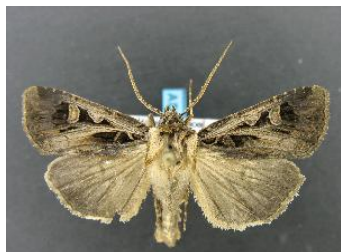

**DH012203 [Dorsal]**  
*Feltia tricosia*  
Family: Noctuidae  
BIN URI: BOLD:ACE9865

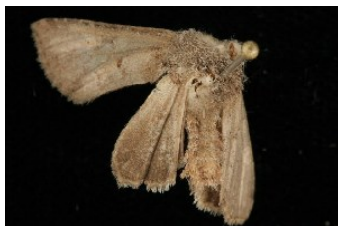

**2005-ONT-1562 [Dorsal]**  
*Lacinipolia meditata*  
Family: Noctuidae  
BIN URI: BOLD:AAA8562

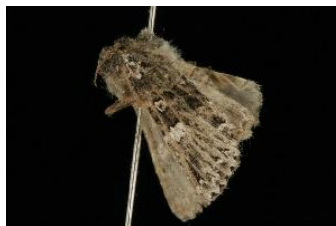

**2005-ONT-197 [Lateral]**  
*Melanchnra adjuncta*  
Family: Noctuidae  
BIN URI: BOLD:ACF4823

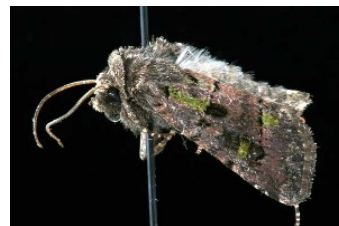

**DNA-ATBI-2444 [Lateral]**  
*Lacinipolia renigera*  
Family: Noctuidae  
BIN URI: BOLD:ABZ4680

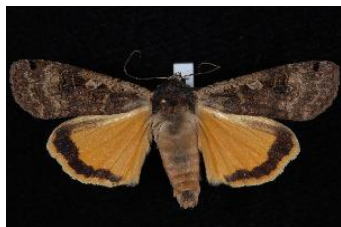

**UBC-2007-0001 [Dorsal]**  
*Noctua pronuba*  
Family: Noctuidae  
BIN URI: BOLD:AAA2632

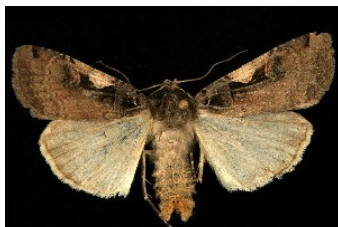

**CGWC-0798 [Dorsal]**  
*Xestia c-nigrum*  
Family: Noctuidae  
BIN URI: BOLD:AAA2144

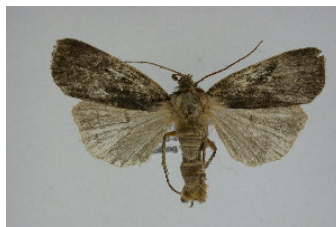

**14-NCCC-696 [Dorsal]**  
*Pseudohermonassa bicarnea*  
Family: Noctuidae  
BIN URI: BOLD:AAB1024

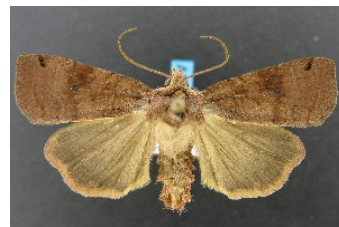

**DH008022 [Dorsal]**  
*Xestia smithii*  
Family: Noctuidae  
BIN URI: BOLD:AAA2590

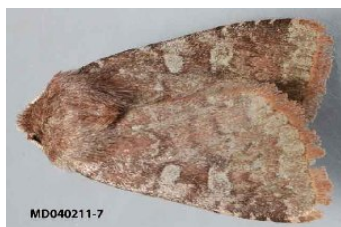

MD040211-7

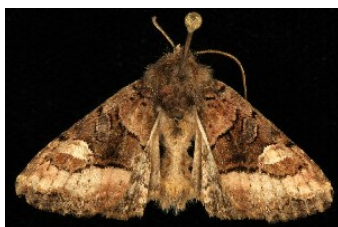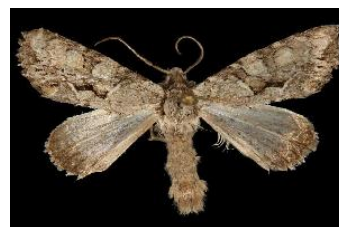

**MDOK-4361 [Dorsal]**  
*Cerastis tenebrifera*  
Family: Noctuidae  
BIN URI: BOLD: AAC1487

**HLC-22923 [Dorsal]**  
*Euplexia benesimilis*  
Family: Noctuidae  
BIN URI: BOLD: AAA4097

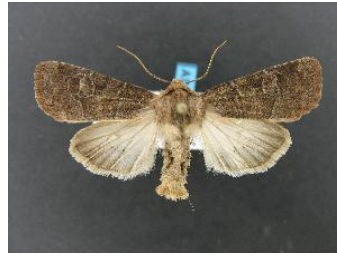

**05-NCCC-795 [Dorsal]**  
*Achatia distincta*  
Family: Noctuidae  
BIN URI: BOLD: AAB7392

**DH009278 [Dorsal]**  
*Crocigrapha normani*  
Family: Noctuidae  
BIN URI: BOLD: AAA6924

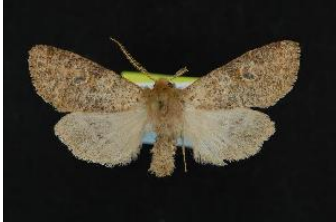

**CNCNoctuoidea12098 [Dorsal]**  
*Orthosia rubescens*  
Family: Noctuidae  
BIN URI: BOLD: AAC0946

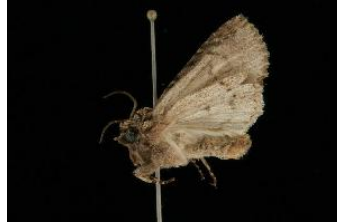

**DNA-ATBI-2480 [Lateral]**  
*Morrisonia confusa*  
Family: Noctuidae  
BIN URI: BOLD: AAA6652

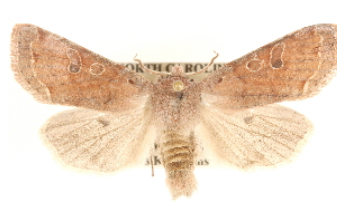

**CCDB-23287-B02 [Dorsal]**  
*Orthosia hibisci*  
Family: Noctuidae  
BIN URI: BOLD: AAA4128

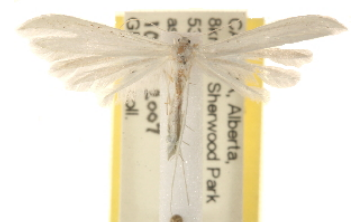

**CCDB-22977-F11 [Dorsal]**  
*Hellinsia homodactylus*  
Family: Pterophoridae  
BIN URI: BOLD: AAB2714

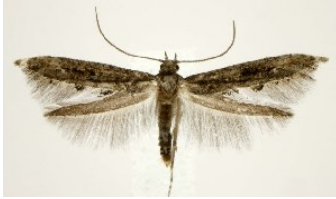

**DNA-ATBI-3410 [Dorsal]**  
*Epermenia*  
Family: Epermeniidae  
BIN URI: BOLD: AAF0142

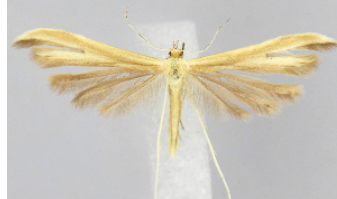

**CNCLEP00040785 [Dorsal]**  
*Hellinsia pectodactylus*  
Family: Pterophoridae  
BIN URI: BOLD: ACF3437

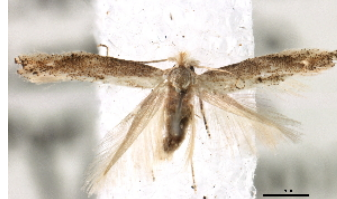

**BIOUG16764-H06 [Dorsal]**  
*Bucculatrix*  
Family: Bucculatricidae  
BIN URI: BOLD: AAB4931

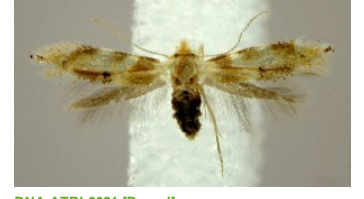

**DNA-ATBI-3021 [Dorsal]**  
*Bucculatrix*  
Family: Bucculatricidae  
BIN URI: BOLD: AAH5592

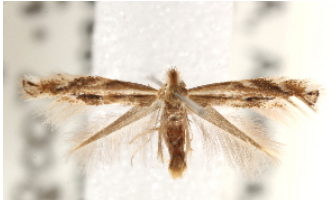

**CCDB-22978-A08 [Dorsal]**  
*Bucculatrix pomifoliella*  
Family: Bucculatricidae  
BIN URI: BOLD: AAD2085

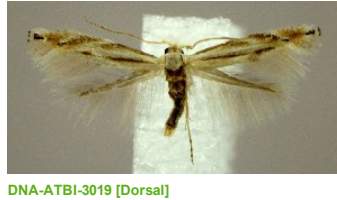

**DNA-ATBI-3019 [Dorsal]**  
*Bucculatrix*  
Family: Bucculatricidae  
BIN URI: BOLD: AAH5599

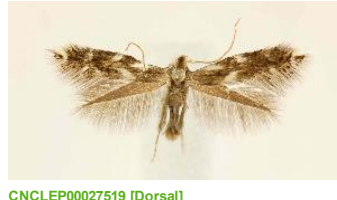

**CNCLEP00027519 [Dorsal]**  
*Bucculatrix*  
Family: Bucculatricidae  
BIN URI: BOLD: AAI3849

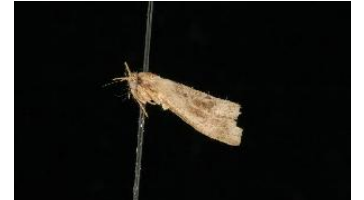

**04HBL007216 [Lateral]**  
*Eucosma similana*  
Family: Tortricidae  
BIN URI: BOLD: AAB4297

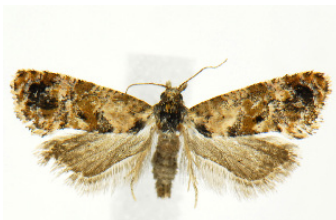

**CNCLEP00040915 [Dorsal]**  
*Cochylis hoffmanana*  
Family: Tortricidae  
BIN URI: BOLD: AAB3571

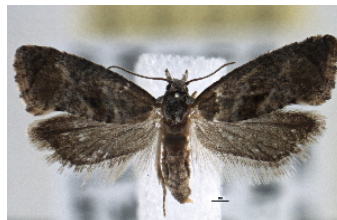

**CNCLEP00101832 [Dorsal]**  
*Phtheochroa temerana*  
Family: Tortricidae  
BIN URI: BOLD: AAB7534

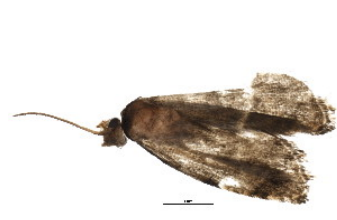

**BIOUG01630-B11 [Lateral]**  
*Phalonia nr. maiana*  
Family: Tortricidae  
BIN URI: BOLD: AAM0777

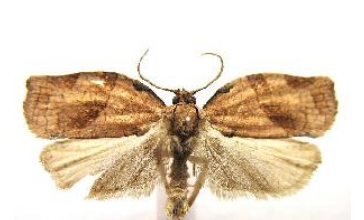

**MDH001278 [Dorsal]**  
*Choristoneura rosaceana*  
Family: Tortricidae  
BIN URI: BOLD: AAA1517

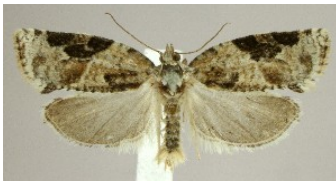

**jflandry2199 [Dorsal]**  
*Argyrotaenia mariana*  
 Family: Tortricidae  
 BIN URI: BOLD:AAA4119

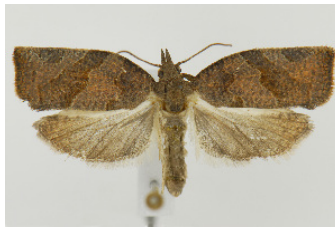

**CNCLEP00038641 [Dorsal]**  
*Pandemis limitata*  
 Family: Tortricidae  
 BIN URI: BOLD:AAA3659

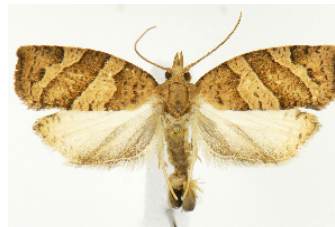

**CNCLEP00041070 [Dorsal]**  
*Pandemis lamprosana*  
 Family: Tortricidae  
 BIN URI: BOLD:AAA8840

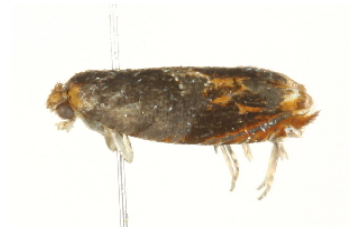

**SNS101L-01097 [Lateral]**  
*Ancylis muricana*  
 Family: Tortricidae  
 BIN URI: BOLD:AAU7760

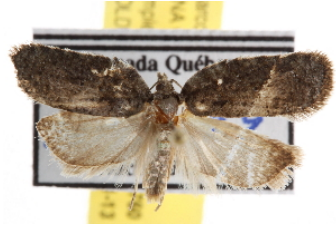

**CNCLEP000101760 [Dorsal]**  
*Acleris hudsoniana*  
 Family: Tortricidae  
 BIN URI: BOLD:AAA7667

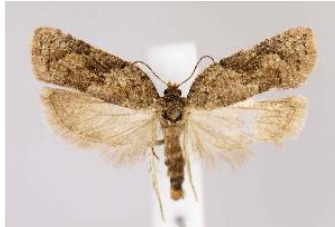

**CNCLEP00029418 [Dorsal]**  
*Acleris cornana*  
 Family: Tortricidae  
 BIN URI: BOLD:ABZ7431

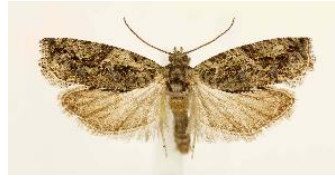

**CNCLEP00025103 [Dorsal]**  
*Proteoteras aesculana*  
 Family: Tortricidae  
 BIN URI: BOLD:AAA6740

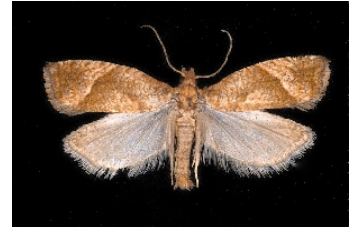

**C096001A16Aug2006 [Dorsal]**  
*Eucosma derelicta*  
 Family: Tortricidae  
 BIN URI: BOLD:AAA9420

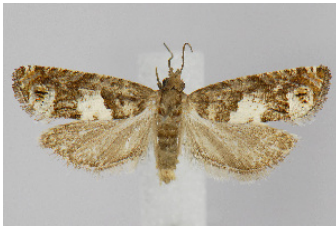

**CNCLEP00040720 [Dorsal]**  
*Phaneta pamtana*  
 Family: Tortricidae  
 BIN URI: BOLD:AAA5487

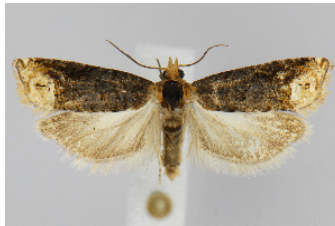

**CNCLEP00040726 [Dorsal]**  
*Phaneta ochroterminana*  
 Family: Tortricidae  
 BIN URI: BOLD:AAA5486

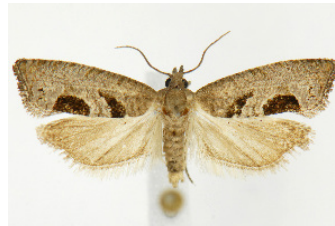

**CNCLEP00040734 [Dorsal]**  
*Phaneta tomonana*  
 Family: Tortricidae  
 BIN URI: BOLD:AAB2093

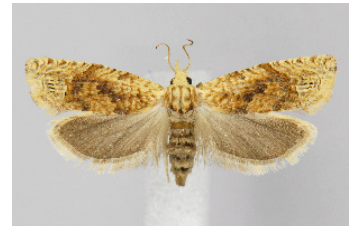

**CNCLEP00040312 [Dorsal]**  
*Phaneta ochrocephala*  
 Family: Tortricidae  
 BIN URI: BOLD:AAB4433

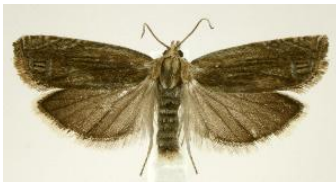

**jflandry2488 [Dorsal]**  
*Phaneta umbrastriana*  
 Family: Tortricidae  
 BIN URI: BOLD:AAA8046

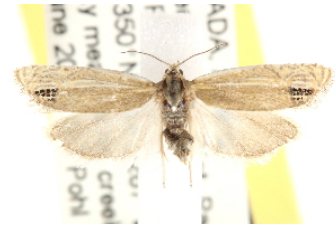

**CCDB-22976-D04 [Dorsal]**  
*Phaneta verna*  
 Family: Tortricidae  
 BIN URI: BOLD:ABA8759

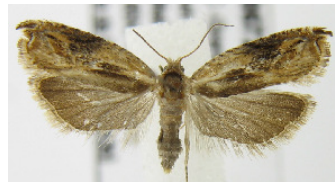

**MDH006725 [Dorsal]**  
*Ancylis spiraeifolia*  
 Family: Tortricidae  
 BIN URI: BOLD:AAC5326

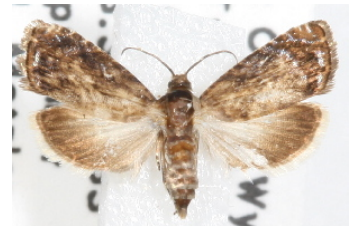

**09-JBTOR-1305 [Dorsal]**  
*Grapholita prunivora*  
 Family: Tortricidae  
 BIN URI: BOLD:AAG0330

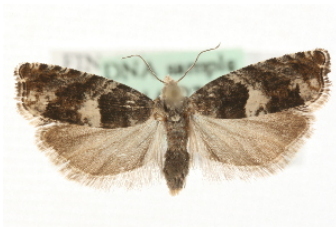

**MM14227 [Dorsal]**  
*Epinotia demamiana*  
 Family: Tortricidae  
 BIN URI: BOLD:AAB0710

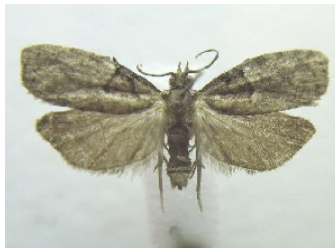

**MDH000531 [Dorsal]**  
*Epinotia medioviridana*  
 Family: Tortricidae  
 BIN URI: BOLD:AAC2645

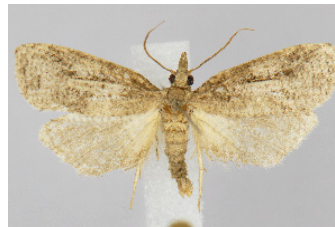

**CNCLEP00040313 [Dorsal]**  
*Platynota idaeusalis*  
 Family: Tortricidae  
 BIN URI: BOLD:ABY7901

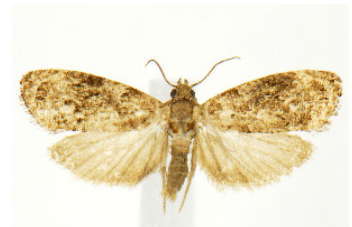

**CNCLEP00040914 [Dorsal]**  
*Endothenia hebesana*  
 Family: Tortricidae  
 BIN URI: BOLD:AAA3308

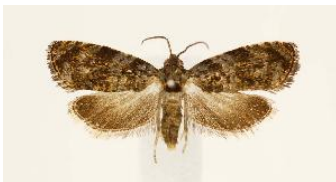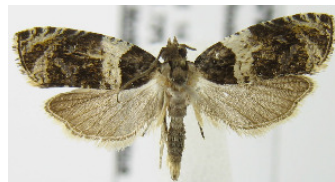

**CNCLEP00026935 [Dorsal]**

*Pristergnatha fuligana*  
Family: Tortricidae  
BIN URI: BOLD: AAC7661

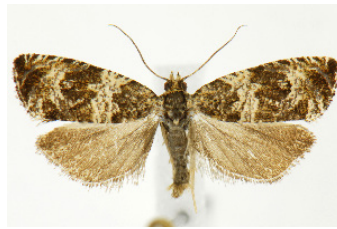

**MDH006793 [Dorsal]**

*Olethreutes fasciatana*  
Family: Tortricidae  
BIN URI: BOLD: AAC2533

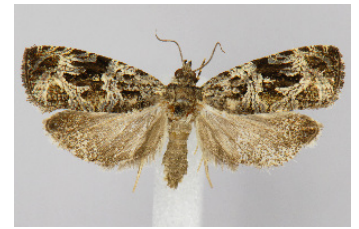

**CNCLEP00041057 [Dorsal]**

*Olethreutes baccatanum*  
Family: Tortricidae  
BIN URI: BOLD: AAA7669

**CNCLEP00040315 [Dorsal]**

*Olethreutes atrodentana*  
Family: Tortricidae  
BIN URI: BOLD: ACF606

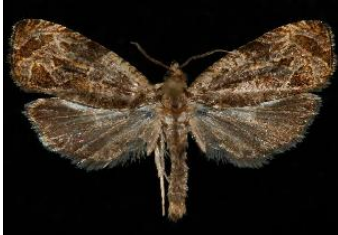

**DNA-ATBI-6352 [Dorsal]**

*Olethreutes permundana*  
Family: Tortricidae  
BIN URI: BOLD: ACF0608

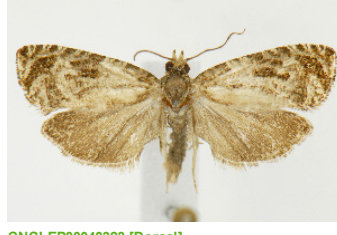

**CNCLEP00040323 [Dorsal]**

*Olethreutes valdanum*  
Family: Tortricidae  
BIN URI: BOLD: ACF0609

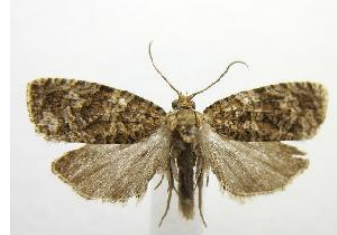

**MDH002273 [Dorsal]**

*Olethreutes electrofuscum*  
Family: Tortricidae  
BIN URI: BOLD: ACF4045

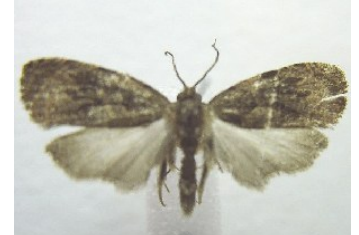

**MDH001777 [Dorsal]**

*Olethreutes permundana*  
Family: Tortricidae  
BIN URI: BOLD: ACE6591

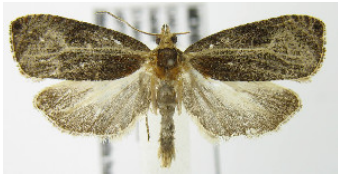

**MDH006338 [Dorsal]**

*Olethreutes quadrifidus*  
Family: Tortricidae  
BIN URI: BOLD: ACF4260

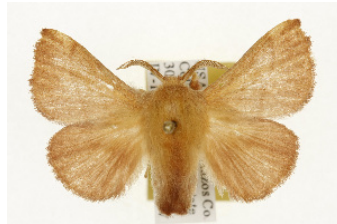

**TAMUICEGR-0828 [Dorsal]**

*Malacosoma distria*  
Family: Lasiocampidae  
BIN URI: BOLD: AAA4130

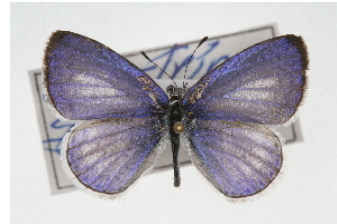

**CSU-CPG-LEP001236 [Dorsal]**

*Celastrina gozora*  
Family: Lycaenidae  
BIN URI: BOLD: ACF0806

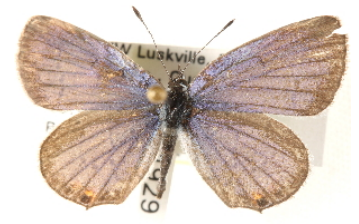

**CCDB-24271-B07 [Dorsal]**

*Cupido comyntas*  
Family: Lycaenidae  
BIN URI: BOLD: ACF5210

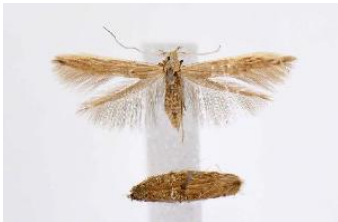

**CNCLEP00010324 [Dorsal]**

*Coleophora intermediella*  
Family: Coleophoridae  
BIN URI: BOLD: AAA3993

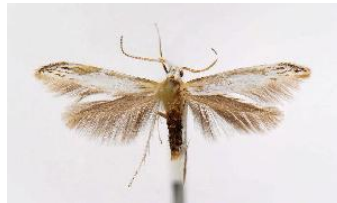

**CNCLEP00027943 [Dorsal]**

*Coleophora thiaefoliella*  
Family: Coleophoridae  
BIN URI: BOLD: AAA7936

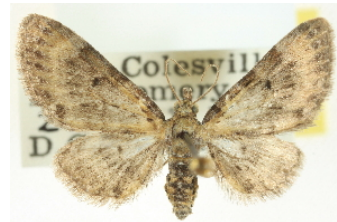

**CCDB-20270-B10 [Dorsal]**

*Eupithecia chlorofasciata*  
Family: Geometridae  
BIN URI: BOLD: AAA4178

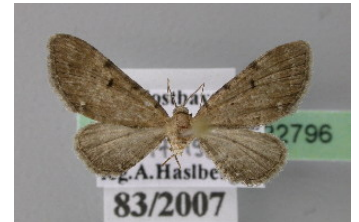

**BC ZSM Lep 22796 [Dorsal]**

*Eupithecia goossensata*  
Family: Geometridae  
BIN URI: BOLD: AAA4217

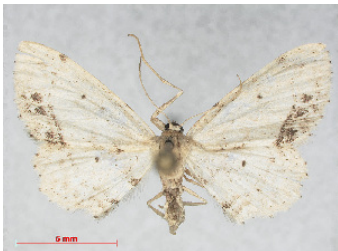

**RMNH.INS.544467 [Dorsal]**

*Idaea dimidiata*  
Family: Geometridae  
BIN URI: BOLD: AAA4213

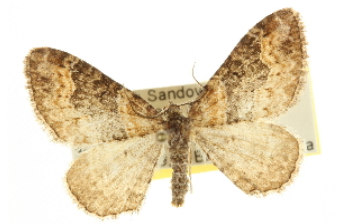

**CCDB-20824-E01 [Dorsal]**

*Xanthorhoe ferrugata*  
Family: Geometridae  
BIN URI: BOLD: AAA3817

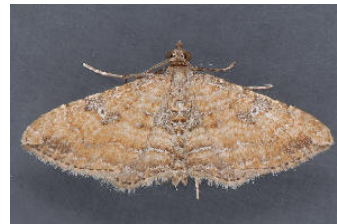

**MDOK-3232 [Dorsal]**

*Orthonama obstipata*  
Family: Geometridae  
BIN URI: BOLD: AAA3430

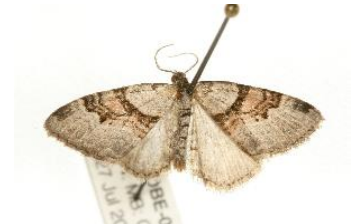

**07PROBE-03851 [Dorsal]**

*Xanthorhoe labradorensis*  
Family: Geometridae  
BIN URI: BOLD: AAA7001

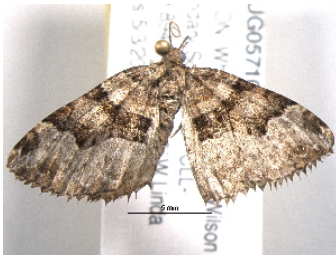

**BIUG05710-F02 [Dorsal]**  
*Xanthorhoe lacustrata*  
 Family: Geometridae  
 BIN URI: BOLD:AAA8660

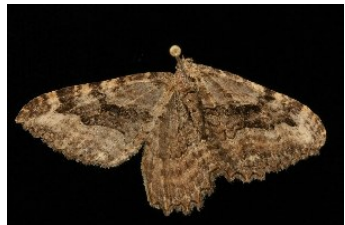

**04HBL00854 [Dorsal]**  
*Coryphista meadii*  
 Family: Geometridae  
 BIN URI: BOLD:AAB1307

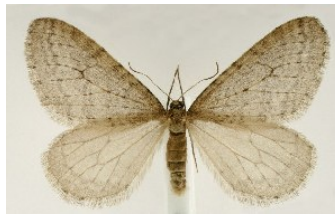

**jflandry1146 [Dorsal]**  
*Operophtera bruceata*  
 Family: Geometridae  
 BIN URI: BOLD:AAA2999

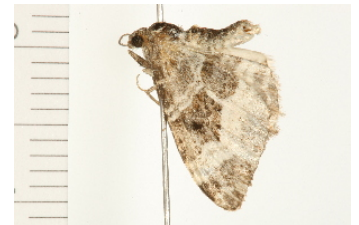

**PPBP-2051 [Lateral]**  
*Epirrhoe alternata*  
 Family: Geometridae  
 BIN URI: BOLD:AAA3371

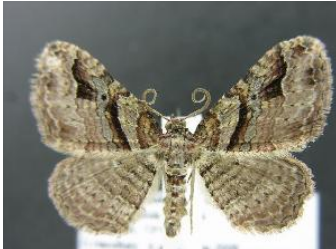

**DH012776 [Dorsal]**  
*Costaconvexa centrotrigaria*  
 Family: Geometridae  
 BIN URI: BOLD:AAA4271

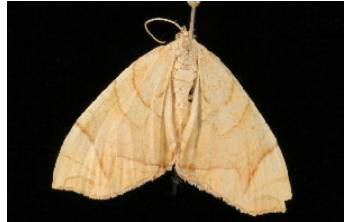

**04HBL005685 [Dorsal]**  
*Eulithis gracilineata*  
 Family: Geometridae  
 BIN URI: BOLD:AAB2705

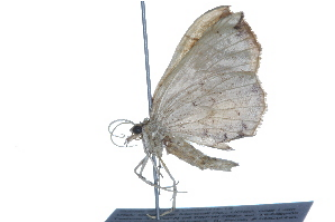

**09BBLEP-01372 [Lateral]**  
*Eulithis gracilineata*  
 Family: Geometridae  
 BIN URI: BOLD:AAB2706

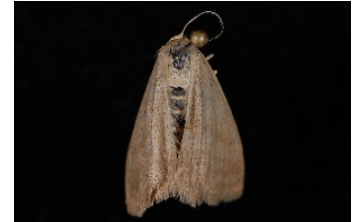

**10-JDWBC-5907 []**  
*Scopula inductata*  
 Family: Geometridae  
 BIN URI: BOLD:AAA5383

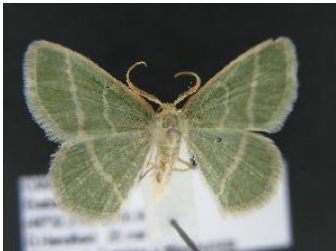

**DH013036 [Dorsal]**  
*Chlorochlamys chloroleucaria*  
 Family: Geometridae  
 BIN URI: BOLD:AAA7313

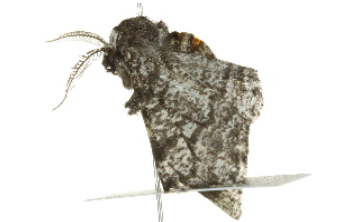

**10BBCLP-1302 [Lateral]**  
*Biston betularia*  
 Family: Geometridae  
 BIN URI: BOLD:AAA1588

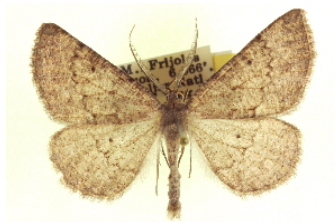

**CCDB-20818-G09 [Dorsal]**  
*Somatophia incana*  
 Family: Geometridae  
 BIN URI: BOLD:AAA9811

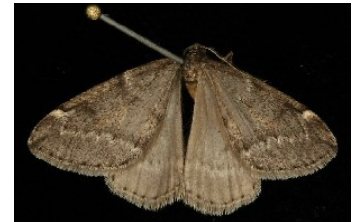

**2005-ONT-2361 [Dorsal]**  
*Alsophila pometaria*  
 Family: Geometridae  
 BIN URI: BOLD:AAB0196

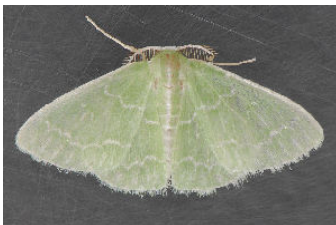

**MDOK-3073 [Dorsal]**  
*Synchlora frondaria*  
 Family: Geometridae  
 BIN URI: BOLD:AAA5690

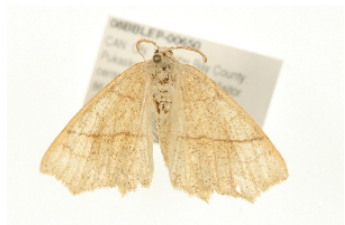

**08BBLEP-00650 [Dorsal]**  
*Besma quercivoraria*  
 Family: Geometridae  
 BIN URI: BOLD:AAA7768

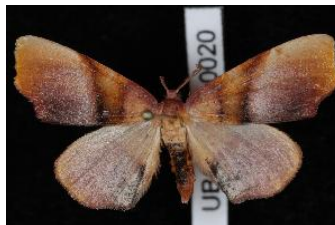

**UBC-2007-0020 [Dorsal]**  
*Plagodis phlogosaria*  
 Family: Geometridae  
 BIN URI: BOLD:AAA3984

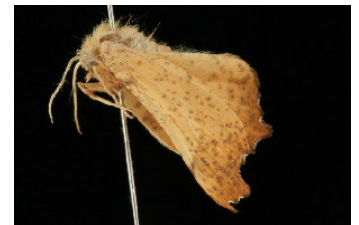

**04HBL006792 [Lateral]**  
*Ennomos magnaria*  
 Family: Geometridae  
 BIN URI: BOLD:AAA5557

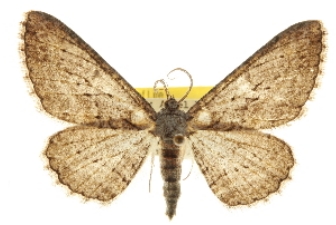

**CCDB-20807-C08 [Dorsal]**  
*Anavitrinella addendaria*  
 Family: Geometridae  
 BIN URI: BOLD:AAA2278

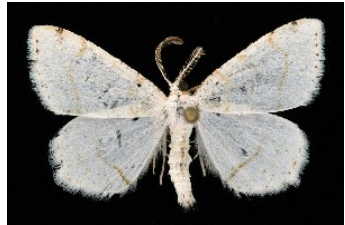

**05-NCCC-168 [Dorsal]**  
*Speranza pustularia*  
 Family: Geometridae  
 BIN URI: BOLD:AAA4456

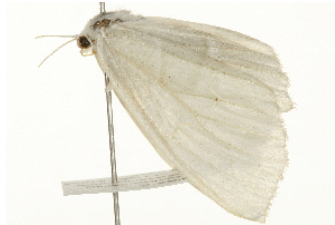

**09BBLE-2043 [Lateral]**  
*Campaea perlata*  
 Family: Geometridae  
 BIN URI: BOLD:AAA2078

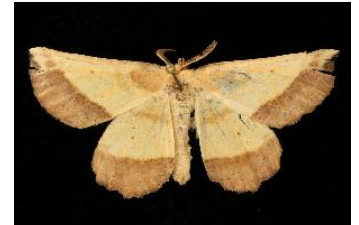

**moth977.01 [Dorsal]**  
*Euchlaena serrata*  
 Family: Geometridae  
 BIN URI: BOLD:ABZ2601

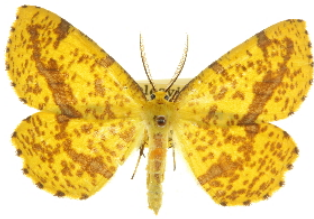

**CCDB-20809-G07 [Dorsal]**  
*Xanthotype barnesi*  
 Family: Geometridae  
 BIN URI: BOLD:AAA6610

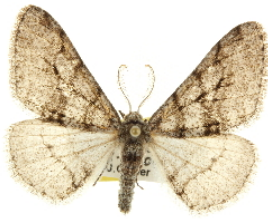

**CCDB-20808-D11 [Dorsal]**  
*Phigalia titea*  
 Family: Geometridae  
 BIN URI: BOLD:AAA5234

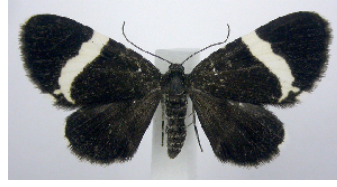

**jflandry0580 [Dorsal]**  
*Trichodezia albovittata*  
 Family: Geometridae  
 BIN URI: BOLD:AAA6926

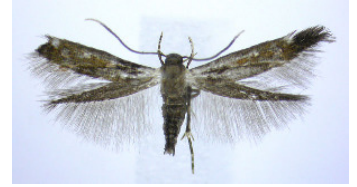

**jflandry0042 [Dorsal]**  
*Mompha terminella*  
 Family: Momphidae  
 BIN URI: BOLD:AA4784

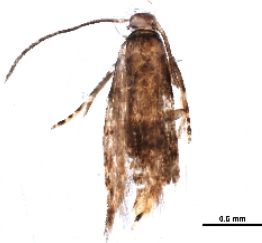

**BIOUG22240-E08 [Dorsal]**  
*Mompha*  
 Family: Momphidae  
 BIN URI: BOLD:ACV2157

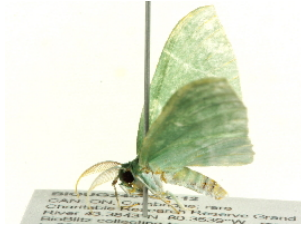

**BIOUG24040-C12 [Lateral]**  
*Dyspteris*  
 Family: Geometridae

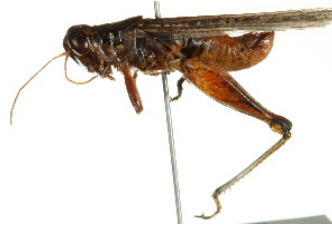

**BIOUG02004-G03 [Lateral]**  
*Melanoplus cinereus*  
 Family: Acrididae  
 BIN URI: BOLD:AAA4555

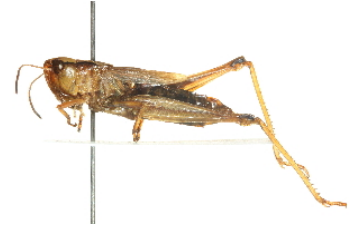

**BIOUG00739-F08 [Lateral]**  
*Chorthippus curtipennis*  
 Family: Acrididae  
 BIN URI: BOLD:AAA6822

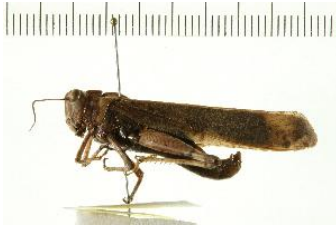

**ORTH 0060.02 [Lateral]**  
*Dissosteira carolina*  
 Family: Acrididae  
 BIN URI: BOLD:AAD3251

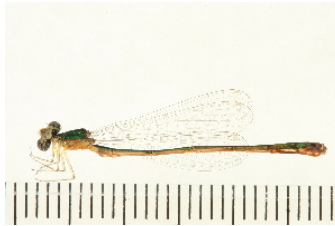

**08OMSOD-0168 [Lateral]**  
*Nehalennia irene*  
 Family: Coenagrionidae  
 BIN URI: BOLD:AAA5874

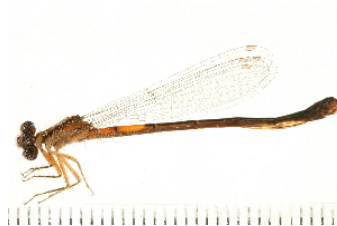

**08OMSOD-0040 [Lateral]**  
*Ischnura verticalis*  
 Family: Coenagrionidae  
 BIN URI: BOLD:AAA2219

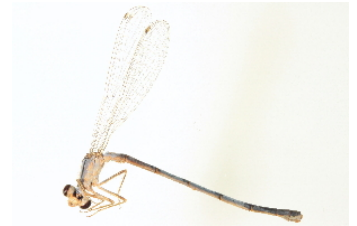

**BIOUG02482-H06 [Lateral]**  
*Ischnura*  
 Family: Coenagrionidae  
 BIN URI: BOLD:AAI2160

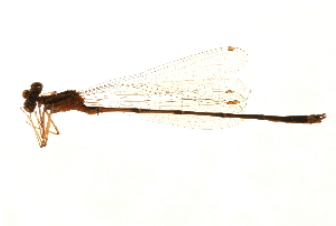

**09BBEOD-0121 [Lateral]**  
*Enallagma signatum*  
 Family: Coenagrionidae  
 BIN URI: BOLD:AAD5238

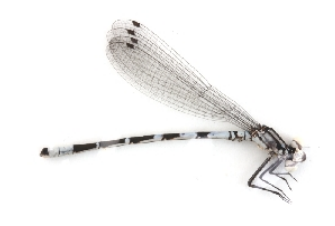

**UAM:Ento:120418 [Lateral]**  
*Enallagma annexum*  
 Family: Coenagrionidae  
 BIN URI: BOLD:AAA2218

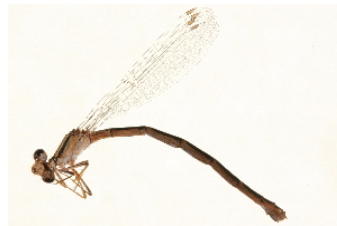

**09BBEOD-0156 [Lateral]**  
*Enallagma civile*  
 Family: Coenagrionidae  
 BIN URI: BOLD:AAB3741

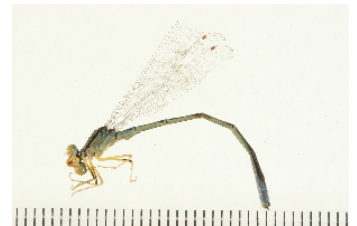

**08OMSOD-0268 [Lateral]**  
*Enallagma antennatum*  
 Family: Coenagrionidae  
 BIN URI: BOLD:AAC0004

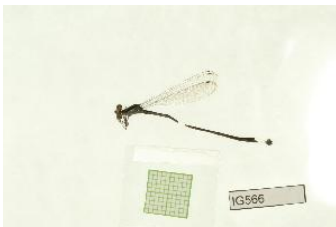

**1G566 []**  
*Enallagma exsulans*  
 Family: Coenagrionidae  
 BIN URI: BOLD:AAI9242

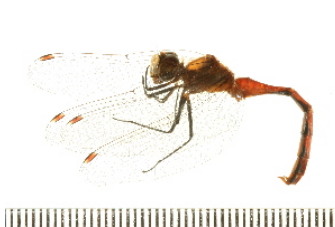

**08BBODO-258 [Lateral]**  
*Sympetrum obtusum*  
 Family: Libellulidae  
 BIN URI: BOLD:AAA5224

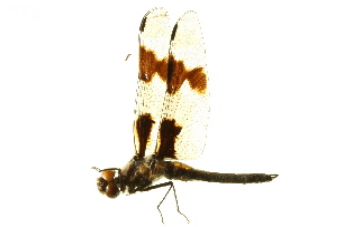

**BIOUG02813-B04 [Lateral]**  
*Libellula forensis*  
 Family: Libellulidae  
 BIN URI: BOLD:AAD6885

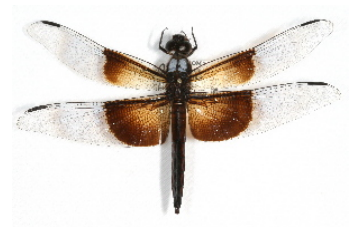

**ENT-OUBS-222 [Dorsal]**  
 Libellulidae  
 Family: Libellulidae  
 BIN URI: BOLD:ABX5734



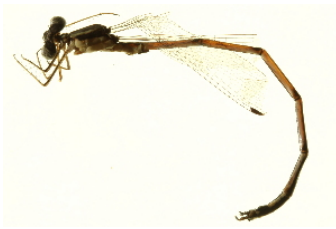

**BIOUG02813-H07 [Lateral]**  
*Lestes rectangularis*  
Family: Lestidae  
BIN URI: BOLD:ACF4056

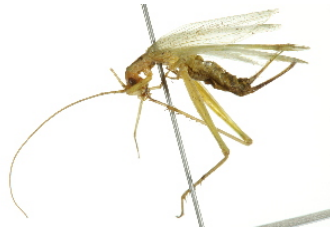

**BIOUG02001-E08 [Lateral]**  
*Oecanthus*  
Family: Gryllidae  
BIN URI: BOLD:AAF9891

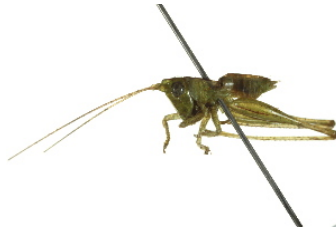

**BIOUG02001-E02 [Lateral]**  
*Conocephalus brevipennis*  
Family: Tettigoniidae  
BIN URI: BOLD:AAK5385

IMAGE NOT AVAILABLE

**BIOUG24020-G11**  
*Conocephalus brevipennis*  
Family: Tettigoniidae

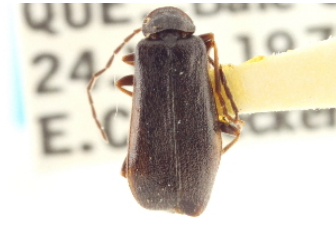

**CNC COLEO 00153333 [Dorsal]**  
*Rhagonycha mandibularis*  
Family: Cantharidae  
BIN URI: BOLD:AAH0920

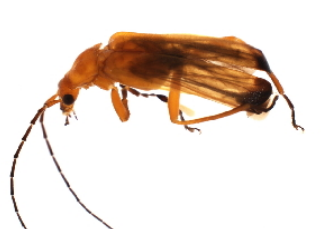

**AY165676 [Lateral]**  
*Rhagonycha fulva*  
Family: Cantharidae  
BIN URI: BOLD:AAL1297

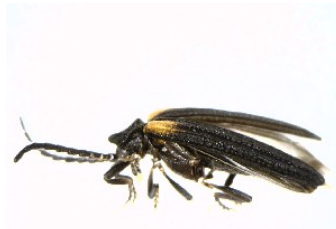

**BIOUG03207-D10 [Lateral]**  
Lycidae  
Family: Lycidae  
BIN URI: BOLD:ACI6664

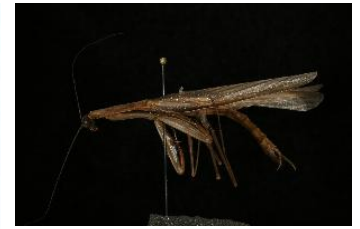

**Uleth-DJ-136 [Lateral]**  
Mantodea  
BIN URI: BOLD:AAF4833

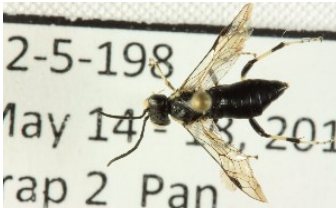

**22-5-198 [Dorsal]**  
*Macrophya flavolineata*  
Family: Tenthredinidae  
BIN URI: BOLD:ABU8852

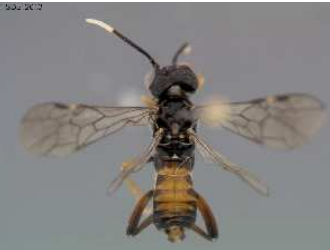

**DEIGISHym15311 [Dorsal]**  
*Taxonus terminalis*  
Family: Tenthredinidae  
BIN URI: BOLD:AAU8702

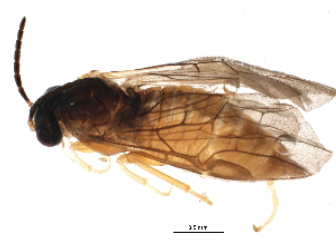

**BIOUG08824-A01 [Lateral]**  
*Caulocampus acericaulis*  
Family: Tenthredinidae  
BIN URI: BOLD:ACJ9109

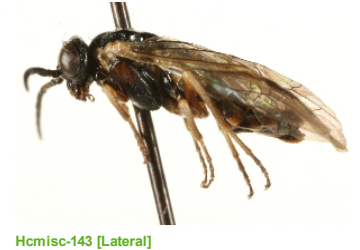

**Hcmisc-143 [Lateral]**  
Periclista  
Family: Tenthredinidae  
BIN URI: BOLD:AAG3550

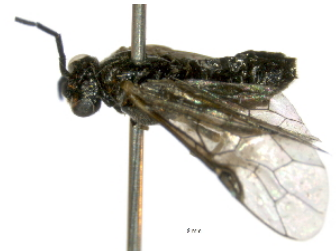

**BIOUG07533-D03 [Lateral]**  
*Priophorus compressicornis*  
Family: Tenthredinidae  
BIN URI: BOLD:ACI7354

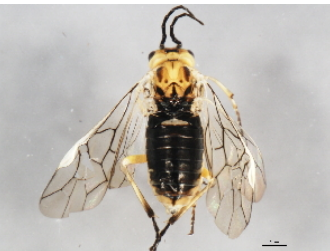

**BIOUG01022-H10 [Dorsal]**  
*Pachynematus albipennis*  
Family: Tenthredinidae  
BIN URI: BOLD:AAAN8130

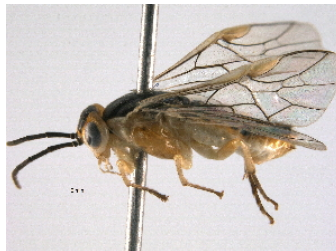

**BIOUG08485-D05 [Lateral]**  
*Pristiphora chlorea*  
Family: Tenthredinidae  
BIN URI: BOLD:ACG2990

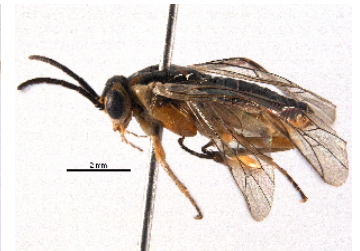

**BIOUG11210-D12 [Lateral]**  
*Pristiphora*  
Family: Tenthredinidae  
BIN URI: BOLD:ACM9731

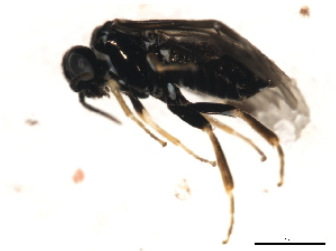

**10BBHYM-0029 [Lateral]**  
Tenthredinidae  
Family: Tenthredinidae  
BIN URI: BOLD:AAAN7643

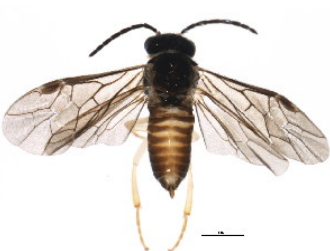

**BIOUG00991-A10 [Dorsal]**  
*Metallus lanceolatus*  
Family: Tenthredinidae  
BIN URI: BOLD:AAP1085

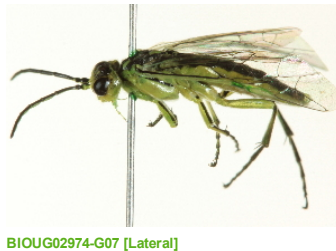

**BIOUG02974-G07 [Lateral]**  
*Rhogogaster*  
Family: Tenthredinidae  
BIN URI: BOLD:ABZ3400

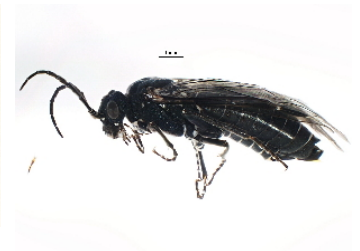

**ASGLE-0442 [Lateral]**  
Hymenoptera  
BIN URI: BOLD:AAG7773

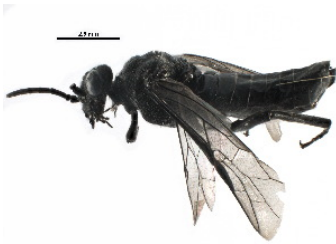

**BIOUG22326-B10 [Lateral]**  
*Dolerus nitens*  
Family: Tenthredinidae  
BIN URI: BOLD:ACV5952

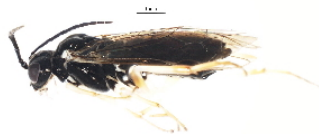

**ASGLE-0396 [Lateral]**  
*Ametastegia pallipes*  
Family: Tenthredinidae  
BIN URI: BOLD:AAE5602

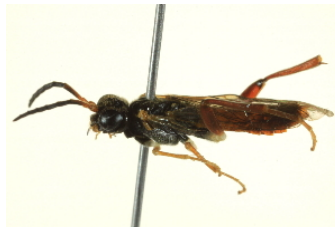

**BIOUG03033-A12 [Lateral]**  
Tenthredinidae  
Family: Tenthredinidae  
BIN URI: BOLD:ACC7921

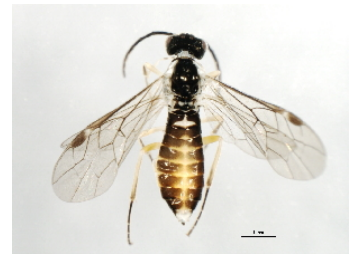

**09BBEHY-1041 [Dorsal]**  
*Ametastegia*  
Family: Tenthredinidae  
BIN URI: BOLD:AAI4543

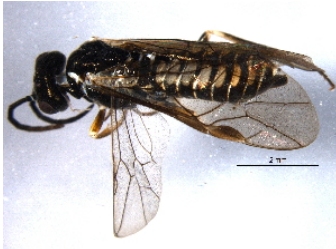

**BIOUG03019-C03 [Dorsal]**  
*Empria maculata*  
Family: Tenthredinidae  
BIN URI: BOLD:ACC8799

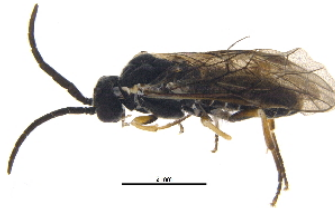

**BIOUG22241-D01 [Lateral]**  
*Empria nordica*  
Family: Tenthredinidae  
BIN URI: BOLD:ACI4328

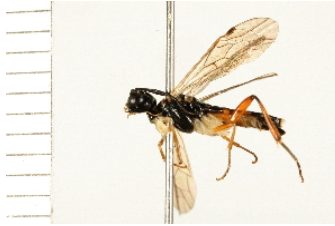

**HYMN 0141.02 [Lateral]**  
Taxonus  
Family: Tenthredinidae  
BIN URI: BOLD:AAG7788

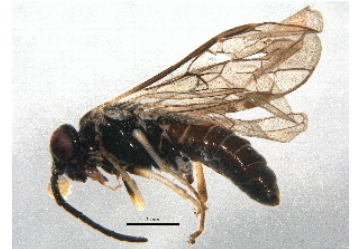

**BIOUG10280-F01 [Lateral]**  
*Monopadnus*  
Family: Tenthredinidae  
BIN URI: BOLD:ACK2140

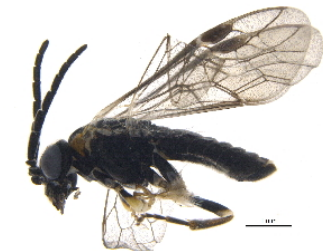

**BIOUG22567-F11 [Lateral]**  
*Tomostethus multicinctus*  
Family: Tenthredinidae  
BIN URI: BOLD:ACV5036

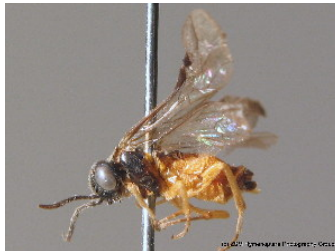

**BC ZSM HYM 11702 [Lateral]**  
*Halidamia affinis*  
Family: Tenthredinidae  
BIN URI: BOLD:AAN7641

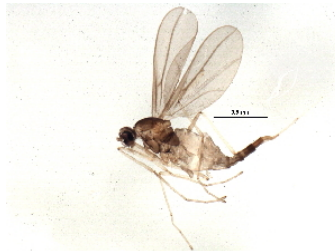

**BIOUG08602-B03 [Lateral]**  
Cecidomyiidae  
Family: Cecidomyiidae  
BIN URI: BOLD:ACK1730

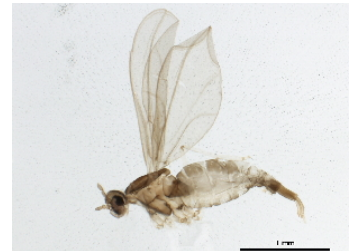

**BIOUG02760-F06 [Lateral]**  
Cecidomyiidae  
Family: Cecidomyiidae  
BIN URI: BOLD:ACA7641

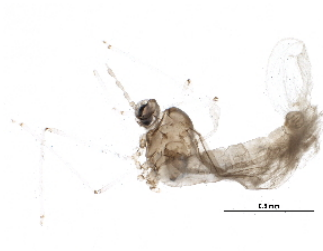

**BIOUG22084-C07 [Lateral]**  
Cecidomyiidae  
Family: Cecidomyiidae  
BIN URI: BOLD:ACV4508

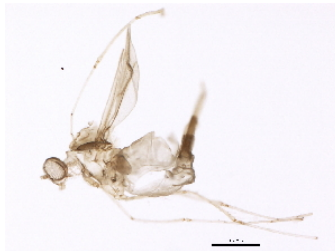

**BIOUG01120-E10 [Lateral]**  
Cecidomyiidae  
Family: Cecidomyiidae  
BIN URI: BOLD:AAV6466

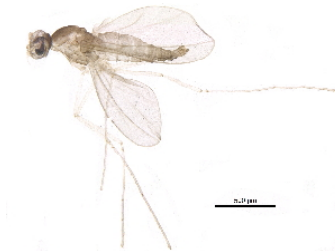

**BIOUG23081-F04 [Lateral]**  
Cecidomyiidae  
Family: Cecidomyiidae  
BIN URI: BOLD:ACW0774

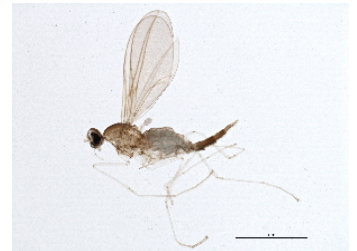

**BIOUG02627-C08 [Lateral]**  
Cecidomyiidae  
Family: Cecidomyiidae  
BIN URI: BOLD:ABX9505

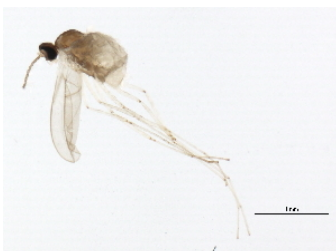

**BIOUG01122-A05 [Lateral]**  
Cecidomyiidae  
Family: Cecidomyiidae  
BIN URI: BOLD:AAN5246

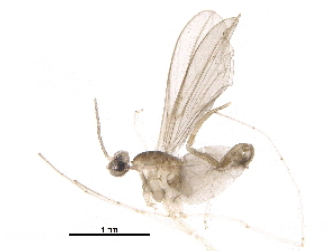

**BIOUG23086-B04 [Lateral]**  
Cecidomyiidae  
Family: Cecidomyiidae  
BIN URI: BOLD:ACW1132

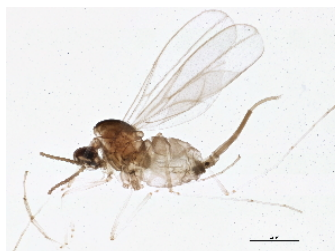

**BIOUG06310-C07 [Lateral]**  
Cecidomyiidae  
Family: Cecidomyiidae  
BIN URI: BOLD:ACC8322

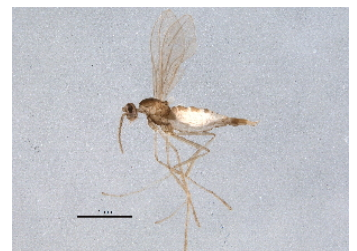

**BIOUG05754-G08 [Lateral]**  
Cecidomyiidae  
Family: Cecidomyiidae  
BIN URI: BOLD:ACG3753

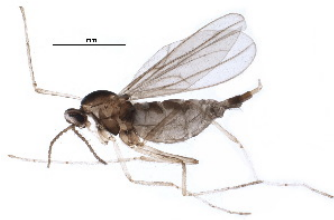

**BIOUG22295-G04 [Lateral]**  
Cecidomyiidae  
Family: Cecidomyiidae  
BIN URI: BOLD:ACV3992

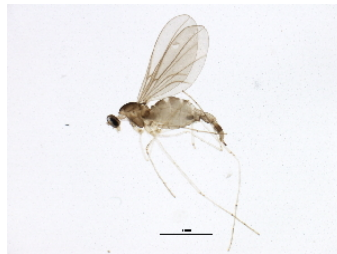

**10PHMAL-3408 [Lateral]**  
Cecidomyiidae  
Family: Cecidomyiidae  
BIN URI: BOLD:AAU6478

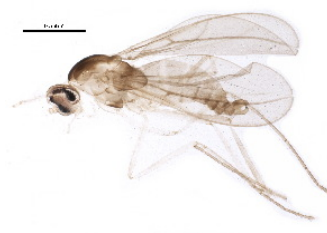

**BIOUG22733-H09 [Lateral]**  
Cecidomyiidae  
Family: Cecidomyiidae  
BIN URI: BOLD:ACA7518

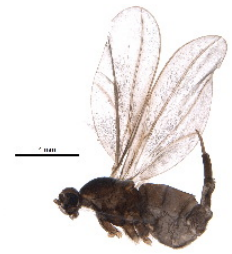

**BIOUG22357-A09 [Lateral]**  
Cecidomyiidae  
Family: Cecidomyiidae  
BIN URI: BOLD:ACA8239

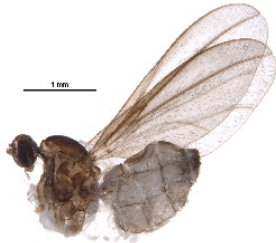

**BIOUG22357-B03 [Lateral]**  
Cecidomyiidae  
Family: Cecidomyiidae  
BIN URI: BOLD:ACV4680

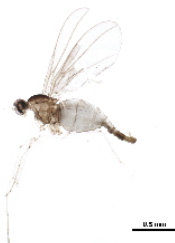

**BIOUG23316-D08 [Lateral]**  
Cecidomyiidae  
Family: Cecidomyiidae  
BIN URI: BOLD:ACW0822

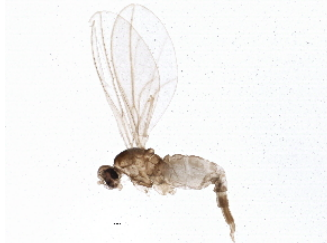

**BIOUG05769-C04 [Lateral]**  
Cecidomyiidae  
Family: Cecidomyiidae  
BIN URI: BOLD:ABW6100

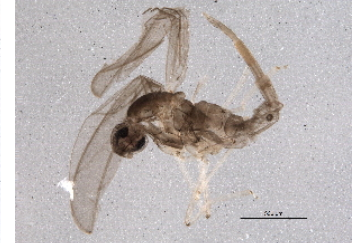

**BIOUG09995-C07 [Lateral]**  
Cecidomyiidae  
Family: Cecidomyiidae  
BIN URI: BOLD:ACL3877

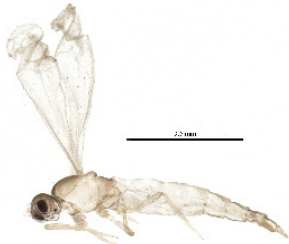

**BIOUG19531-D03 [Lateral]**  
Cecidomyiidae  
Family: Cecidomyiidae  
BIN URI: BOLD:ABW1321

**IMAGE NOT AVAILABLE**

**BIOUG23084-H11**  
Cecidomyiidae  
Family: Cecidomyiidae  
BIN URI: BOLD:ACL0151

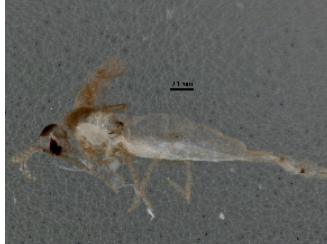

**BIOUG03687-F06 [Lateral]**  
Cecidomyiidae  
Family: Cecidomyiidae  
BIN URI: BOLD:ACA6240

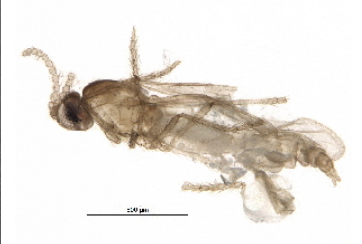

**BIOUG09829-E02 [Lateral]**  
Cecidomyiidae  
Family: Cecidomyiidae  
BIN URI: BOLD:ACL6616

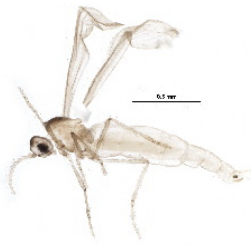

**BIOUG22467-B05 [Lateral]**  
Cecidomyiidae  
Family: Cecidomyiidae  
BIN URI: BOLD:ACC7243

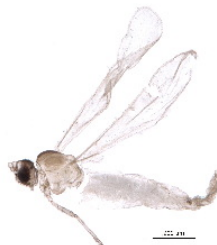

**BIOUG22353-F05 [Lateral]**  
Cecidomyiidae  
Family: Cecidomyiidae  
BIN URI: BOLD:ACM1165

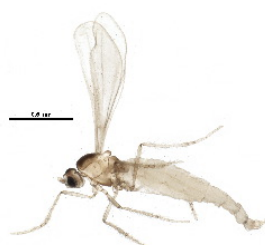

**BIOUG22295-H07 [Lateral]**  
Cecidomyiidae  
Family: Cecidomyiidae  
BIN URI: BOLD:ACM1549

**IMAGE NOT AVAILABLE**

**BIOUG22456-H04**  
Cecidomyiidae  
Family: Cecidomyiidae

**IMAGE NOT AVAILABLE**

**BIOUG22351-G05**  
Cecidomyiidae  
Family: Cecidomyiidae

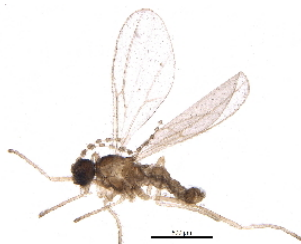

**BIOUG07902-A02 [Lateral]**  
Cecidomyiidae  
Family: Cecidomyiidae  
BIN URI: BOLD:ACJ0206

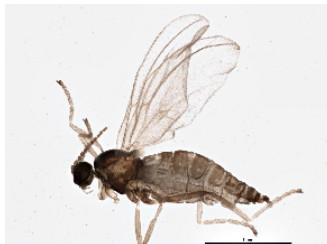

**BIOUG05503-B09 [Lateral]**  
Cecidomyiidae  
Family: Cecidomyiidae  
BIN URI: BOLD:AAN5268

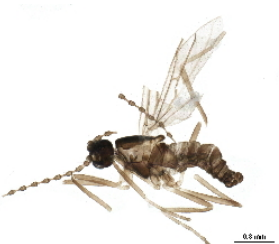

**BIOUG22235-H11 [Lateral]**  
Cecidomyiidae  
Family: Cecidomyiidae  
BIN URI: BOLD:ACF7379

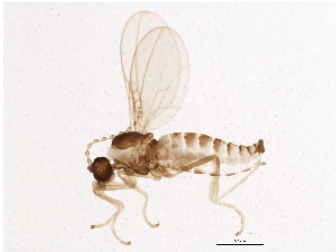

**BIOUG01620-C06 [Lateral]**  
Cecidomyiidae  
Family: Cecidomyiidae  
BIN URI: BOLD:ABV1222

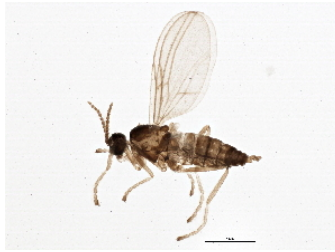

**BIOUG05570-C12 [Lateral]**  
Cecidomyiidae  
Family: Cecidomyiidae  
BIN URI: BOLD:ACF7633

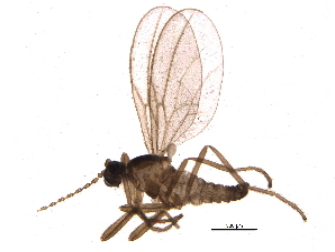

**BIOUG10178-F02 [Lateral]**  
Cecidomyiidae  
Family: Cecidomyiidae  
BIN URI: BOLD:AAH3630

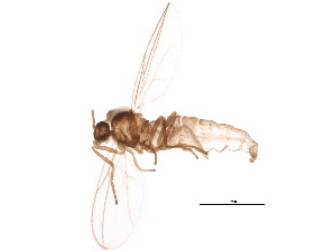

**BIOUG01658-B09 [Lateral]**  
Cecidomyiidae  
Family: Cecidomyiidae  
BIN URI: BOLD:ABA1220

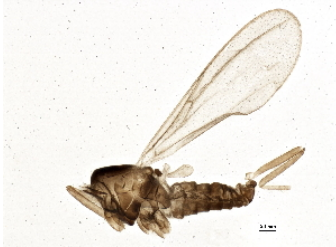

**BIOUG07577-D11 [Lateral]**  
Cecidomyiidae  
Family: Cecidomyiidae  
BIN URI: BOLD:ABA0844

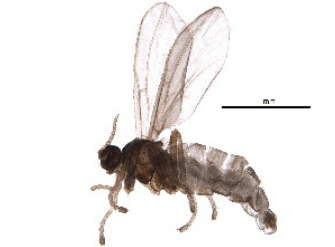

**BIOUG22351-C05 [Lateral]**  
Cecidomyiidae  
Family: Cecidomyiidae  
BIN URI: BOLD:ACV3674

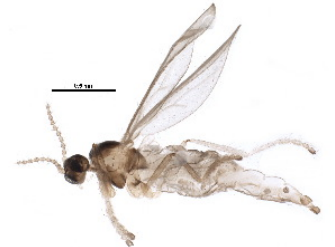

**BIOUG22295-G06 [Lateral]**  
Cecidomyiidae  
Family: Cecidomyiidae  
BIN URI: BOLD:AAP5342

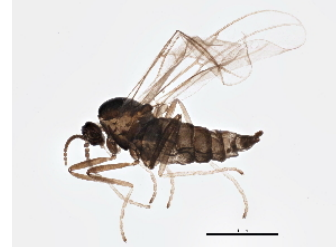

**BIOUG05503-B03 [Lateral]**  
Cecidomyiidae  
Family: Cecidomyiidae  
BIN URI: BOLD:ABA1223

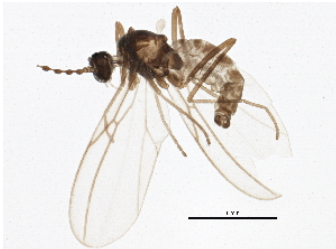

**BIOUG02726-A01 [Lateral]**  
Cecidomyiidae  
Family: Cecidomyiidae  
BIN URI: BOLD:ABX8104

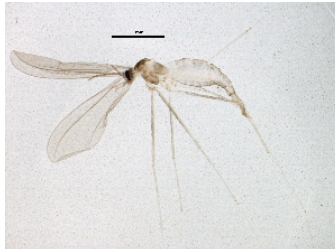

**BIOUG03444-C09 [Lateral]**  
Cecidomyiidae  
Family: Cecidomyiidae  
BIN URI: BOLD:ABA0852

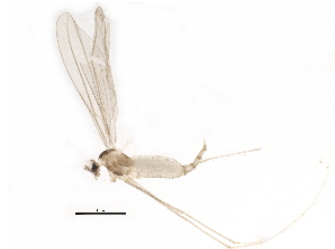

**BIOUG08723-D02 [Lateral]**  
Cecidomyiidae  
Family: Cecidomyiidae  
BIN URI: BOLD:ACK3141

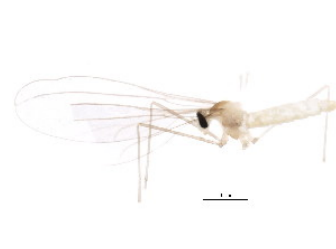

**BIOUG01360-E08 [Lateral]**  
Cecidomyiidae  
Family: Cecidomyiidae  
BIN URI: BOLD:AAM6097

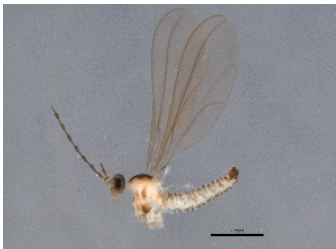

**BIOUG03658-C05 [Lateral]**  
Cecidomyiidae  
Family: Cecidomyiidae  
BIN URI: BOLD:AAV5688

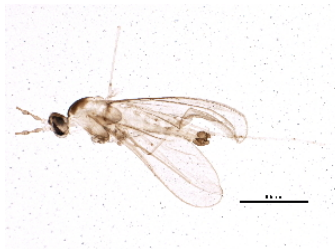

**BIOUG02510-C02 [Lateral]**  
Cecidomyiidae  
Family: Cecidomyiidae  
BIN URI: BOLD:ABX9970

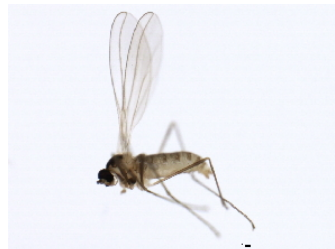

**10BBCDIP-1328 [Lateral]**  
Cecidomyiidae  
Family: Cecidomyiidae  
BIN URI: BOLD:AAV5630

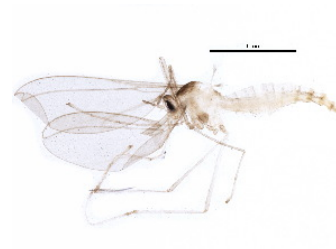

**BIOUG22415-E10 [Lateral]**  
Cecidomyiidae  
Family: Cecidomyiidae  
BIN URI: BOLD:ACV2603

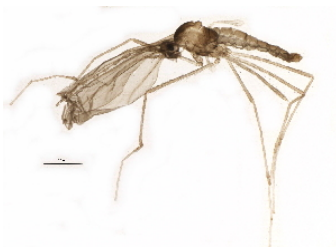

**BIOUG06796-A10 [Lateral]**  
Cecidomyiidae  
Family: Cecidomyiidae  
BIN URI: BOLD:ACI6861

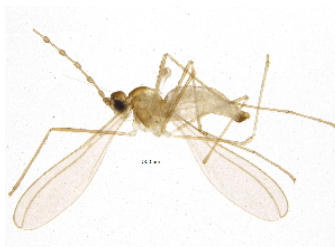

**BIOUG02627-B08 [Lateral]**  
Cecidomyiidae  
Family: Cecidomyiidae  
BIN URI: BOLD:AAV6407

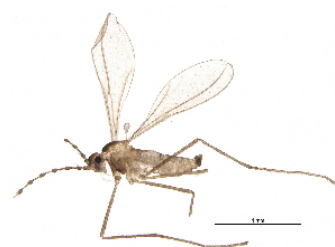

**BIOUG08554-H09 [Lateral]**  
Cecidomyiidae  
Family: Cecidomyiidae  
BIN URI: BOLD:ACK1358

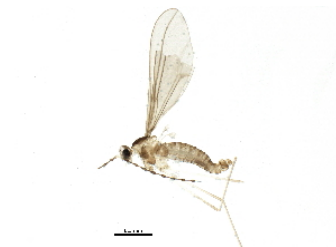

**BIOUG22865-D09 [Lateral]**  
Cecidomyiidae  
Family: Cecidomyiidae  
BIN URI: BOLD:ACV5166

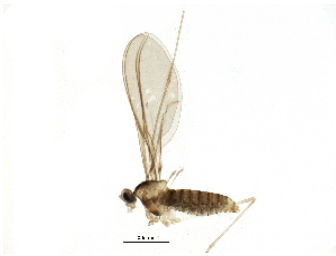

**BIOUG22865-A08 [Lateral]**  
Cecidomyiidae  
Family: Cecidomyiidae  
BIN URI: BOLD:ACV5434

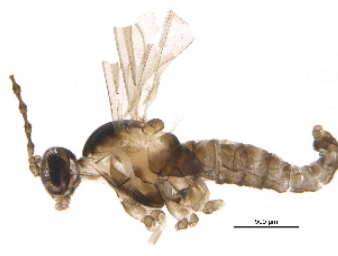

**BIOUG22239-H08 [Lateral]**  
Cecidomyiidae  
Family: Cecidomyiidae  
BIN URI: BOLD:ACV2679

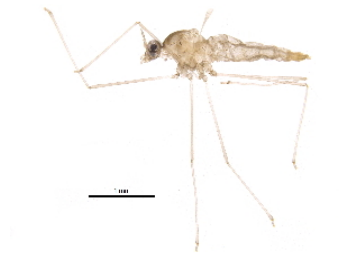

**BIOUG22838-C07 [Lateral]**  
Cecidomyiidae  
Family: Cecidomyiidae  
BIN URI: BOLD:ACV9326

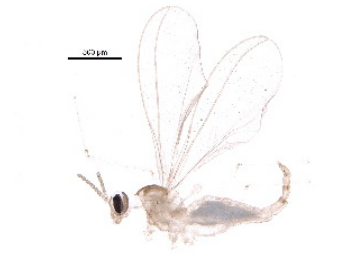

**BIOUG22454-F09 [Lateral]**  
Cecidomyiidae  
Family: Cecidomyiidae  
BIN URI: BOLD:ABV1487

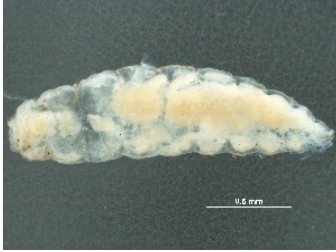

**BIOUG21887-F05 [Larva]**  
Cecidomyiidae  
Family: Cecidomyiidae  
BIN URI: BOLD:ACV4255

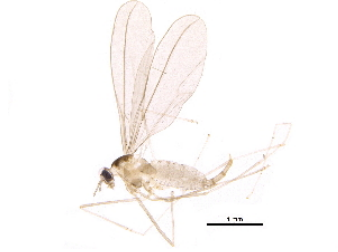

**BIOUG22329-B06 [Lateral]**  
Cecidomyiidae  
Family: Cecidomyiidae  
BIN URI: BOLD:ABW0442

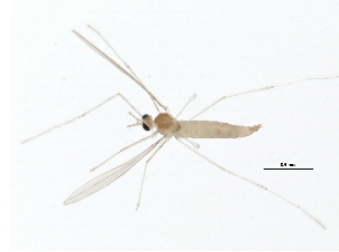

**08TTML-2477 [Dorsal]**  
Cecidomyiidae  
Family: Cecidomyiidae  
BIN URI: BOLD:AAN5249

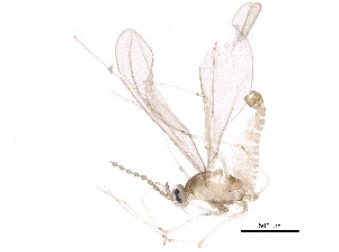

**BIOUG23314-G12 [Lateral]**  
Cecidomyiidae  
Family: Cecidomyiidae  
BIN URI: BOLD:ACW0974

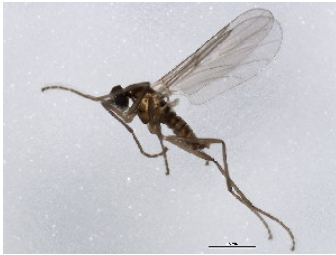

**10BBCDIP-0429 [Lateral]**  
Cecidomyiidae  
Family: Cecidomyiidae  
BIN URI: BOLD:AAP6849

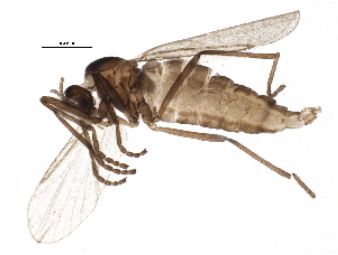

**BIOUG17416-B10 [Lateral]**  
Cecidomyiidae  
Family: Cecidomyiidae  
BIN URI: BOLD:AAU6594

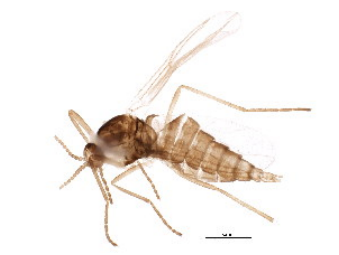

**BIOUG01610-E02 [Lateral]**  
Cecidomyiidae  
Family: Cecidomyiidae  
BIN URI: BOLD:ABV1329

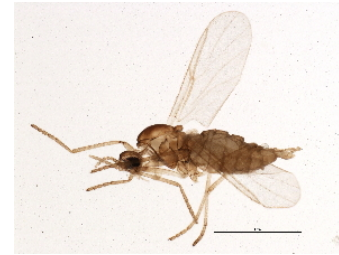

**BIOUG02583-G03 [Lateral]**  
Cecidomyiidae  
Family: Cecidomyiidae  
BIN URI: BOLD:ACA1234

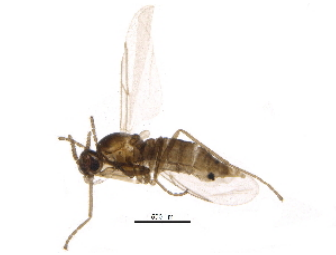

**BIOUG23079-C12 [Lateral]**  
Cecidomyiidae  
Family: Cecidomyiidae  
BIN URI: BOLD:AAG6460

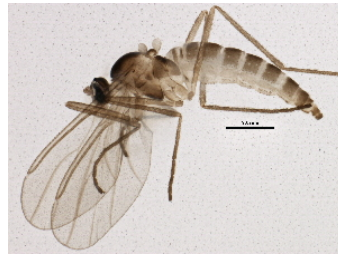

**BIOUG05625-G04 [Lateral]**  
Cecidomyiidae  
Family: Cecidomyiidae  
BIN URI: BOLD:AAP9021

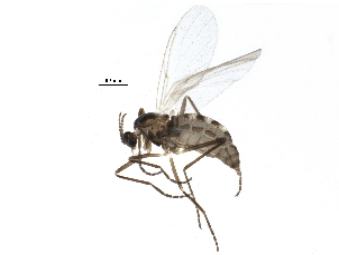

**BIOUG08741-E12 [Lateral]**  
Cecidomyiidae  
Family: Cecidomyiidae  
BIN URI: BOLD:ACK3431

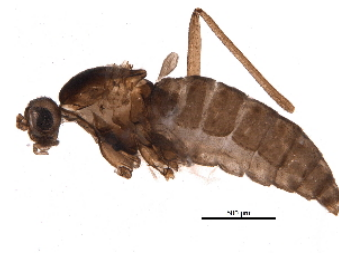

**BIOUG14694-G09 [Lateral]**  
Cecidomyiidae  
Family: Cecidomyiidae  
BIN URI: BOLD:ACP5423

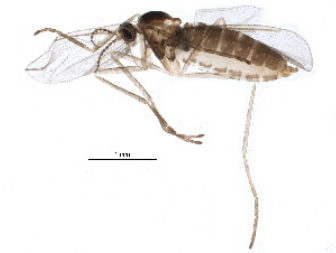

**BIOUG22463-G05 [Lateral]**  
Cecidomyiidae  
Family: Cecidomyiidae  
BIN URI: BOLD:ACV2861

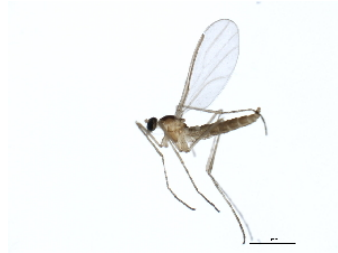

**09BBDIP-1765 [Lateral]**  
Cecidomyiidae  
Family: Cecidomyiidae  
BIN URI: BOLD:AAH3671

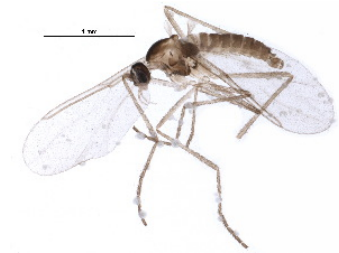

**BIOUG22295-G02 [Lateral]**  
Cecidomyiidae  
Family: Cecidomyiidae  
BIN URI: BOLD:ABV0480

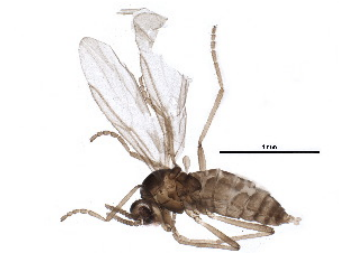

**BIOUG22295-G05 [Lateral]**  
Cecidomyiidae  
Family: Cecidomyiidae  
BIN URI: BOLD:ACV3989

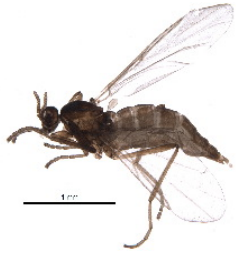

**BIOUG22168-B05 [Lateral]**  
Cecidomyiidae  
Family: Cecidomyiidae  
BIN URI: BOLD:ABV1474

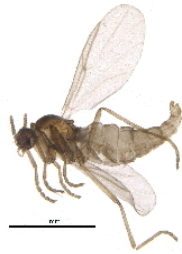

**BIOUG22330-F12 [Lateral]**  
Cecidomyiidae  
Family: Cecidomyiidae  
BIN URI: BOLD:ACV4250

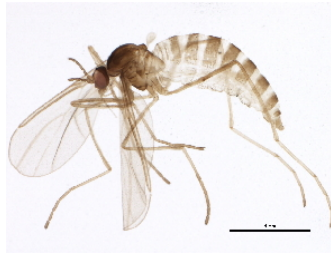

**BIOUG01662-H02 [Lateral]**  
Cecidomyiidae  
Family: Cecidomyiidae  
BIN URI: BOLD:ABA6448

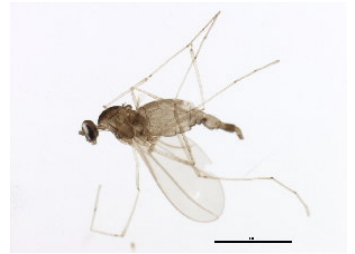

**10PHMAL-3426 [Lateral]**  
Cecidomyiidae  
Family: Cecidomyiidae  
BIN URI: BOLD:AAU6483

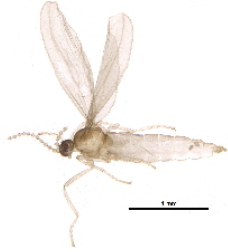

**BIOUG22328-G06 [Lateral]**  
Cecidomyiidae  
Family: Cecidomyiidae  
BIN URI: BOLD:ACV2942

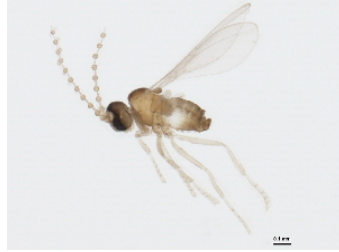

**BIOUG01409-D03 [Lateral]**  
Cecidomyiidae  
Family: Cecidomyiidae  
BIN URI: BOLD:AAN5215

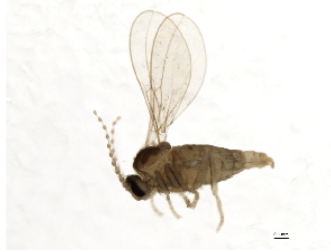

**09BBDIP-1932 [Lateral]**  
Cecidomyiidae  
Family: Cecidomyiidae  
BIN URI: BOLD:AAM6043

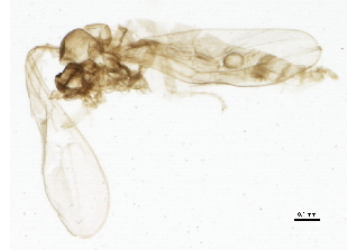

**BIOUG01449-F06 [Lateral]**  
Cecidomyiidae  
Family: Cecidomyiidae  
BIN URI: BOLD:ABV0479

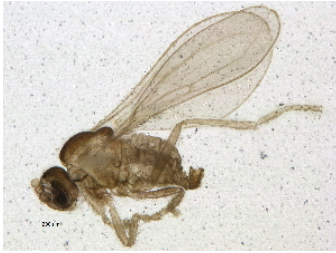

**BIOUG04356-D01 [Lateral]**  
Cecidomyiidae  
Family: Cecidomyiidae  
BIN URI: BOLD:ABW6101

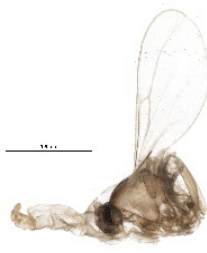

**BIOUG20932-G05 [Lateral]**  
Diptera  
BIN URI: BOLD:ACU7441

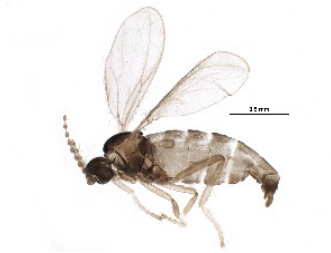

**BIOUG22417-E04 [Lateral]**  
Cecidomyiidae  
Family: Cecidomyiidae  
BIN URI: BOLD:ACV4544

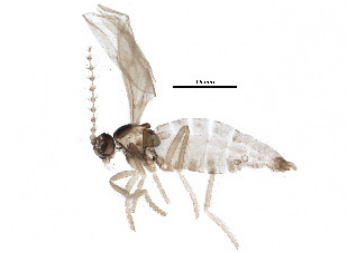

**BIOUG22291-D05 [Lateral]**  
Cecidomyiidae  
Family: Cecidomyiidae  
BIN URI: BOLD:AAQ0640

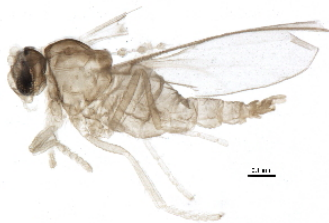

**BIOUG15597-E12 [Lateral]**  
Cecidomyiidae  
Family: Cecidomyiidae  
BIN URI: BOLD:ACF7688

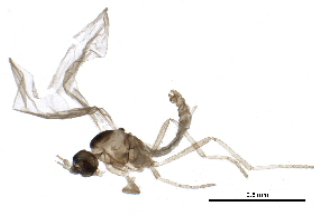

**BIOUG21892-D08 [Lateral]**  
Cecidomyiidae  
Family: Cecidomyiidae  
BIN URI: BOLD:ACV4891

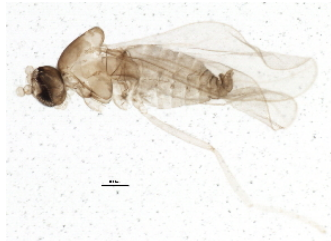

**BIOUG02667-B06 [Lateral]**  
Cecidomyiidae  
Family: Cecidomyiidae  
BIN URI: BOLD:AAV5559

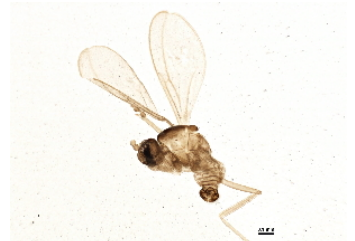

**BIOUG03978-F05 [Lateral]**  
Cecidomyiidae  
Family: Cecidomyiidae  
BIN URI: BOLD:ACB9780

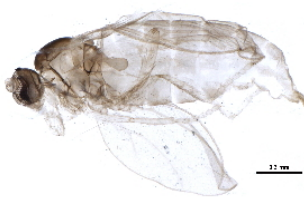

**BIOUG11816-C10 [Lateral]**  
Cecidomyiidae  
Family: Cecidomyiidae  
BIN URI: BOLD:ACM6249

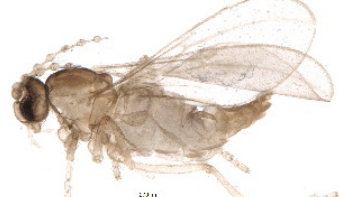

**BIOUG20772-H10 [Lateral]**  
Diptera  
BIN URI: BOLD:ACQ9861

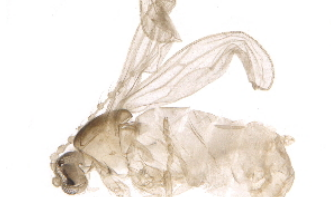

**BIOUG23076-F12 [Lateral]**  
Cecidomyiidae  
Family: Cecidomyiidae  
BIN URI: BOLD:AAY6441

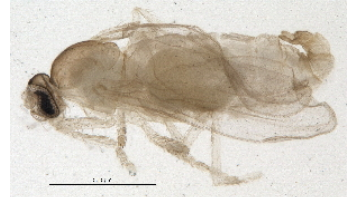

**BIOUG03591-E03 [Lateral]**  
Cecidomyiidae  
Family: Cecidomyiidae  
BIN URI: BOLD:ABV9284

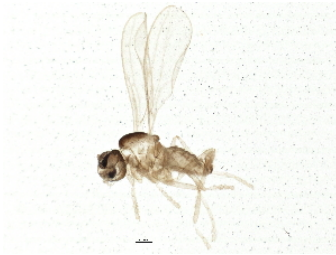

**BIOUG03732-E05 [Lateral]**  
Cecidomyiidae  
Family: Cecidomyiidae  
BIN URI: BOLD:AAV5762

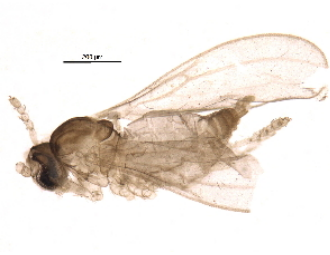

**BIOUG11144-E08 [Lateral]**  
Cecidomyiidae  
Family: Cecidomyiidae  
BIN URI: BOLD:ACA4778

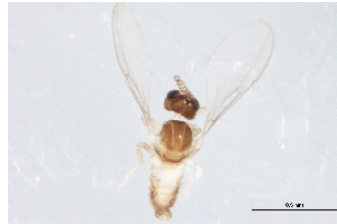

**08TTML-1165 [Dorsal]**  
Cecidomyiidae  
Family: Cecidomyiidae  
BIN URI: BOLD:AAN5228

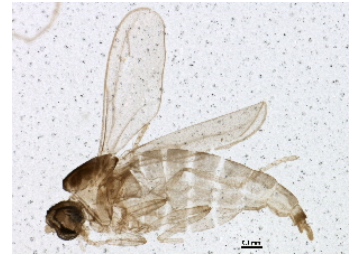

**BIOUG02871-C09 [Lateral]**  
Cecidomyiidae  
Family: Cecidomyiidae  
BIN URI: BOLD:AAN5250

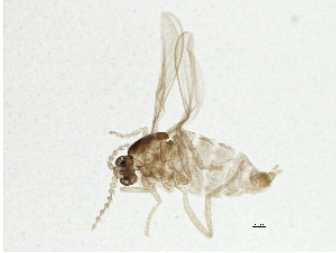

**BIOUG03327-E04 [Lateral]**  
Cecidomyiidae  
Family: Cecidomyiidae  
BIN URI: BOLD:ABX8601

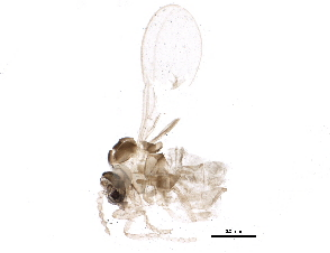

**BIOUG12128-C05 [Lateral]**  
Cecidomyiidae  
Family: Cecidomyiidae  
BIN URI: BOLD:ACL6620

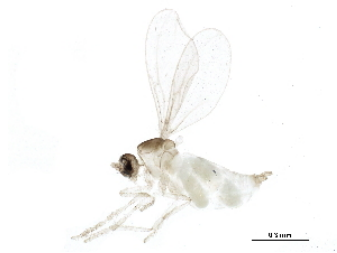

**BIOUG20736-H03 [Lateral]**  
Diptera  
BIN URI: BOLD:ACU3942

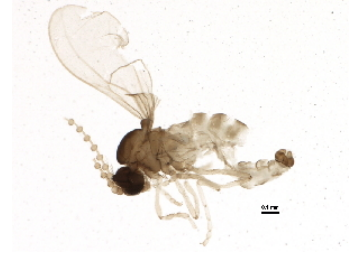

**BIOUG01131-B11 [Lateral]**  
Cecidomyiidae  
Family: Cecidomyiidae  
BIN URI: BOLD:AAV6443

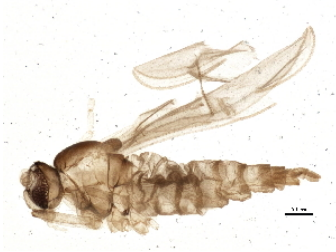

**BIOUG02662-H01 [Lateral]**  
Cecidomyiidae  
Family: Cecidomyiidae  
BIN URI: BOLD:AAZ0300

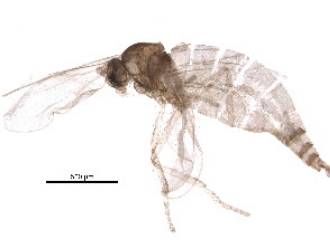

**BIOUG23075-E06 [Lateral]**  
Cecidomyiidae  
Family: Cecidomyiidae  
BIN URI: BOLD:ACV5763

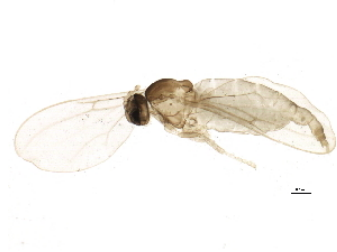

**BIOUG01489-B04 [Lateral]**  
Cecidomyiidae  
Family: Cecidomyiidae  
BIN URI: BOLD:AAU6607

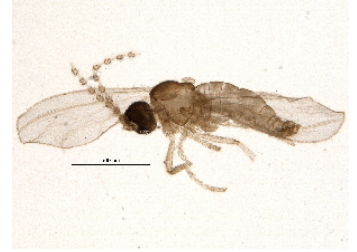

**BIOUG03591-B10 [Lateral]**  
Cecidomyiidae  
Family: Cecidomyiidae  
BIN URI: BOLD:ACC7540

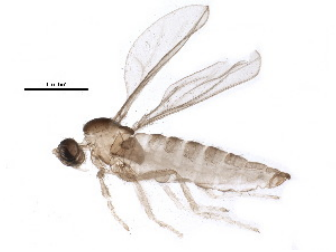

**BIOUG22452-F10 [Lateral]**  
Cecidomyiidae  
Family: Cecidomyiidae  
BIN URI: BOLD:ABX9178

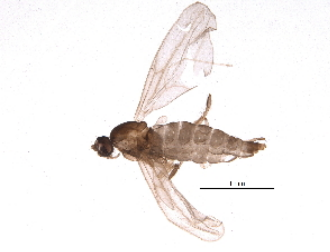

**BIOUG11738-D02 [Lateral]**  
Cecidomyiidae  
Family: Cecidomyiidae  
BIN URI: BOLD:ACM6155

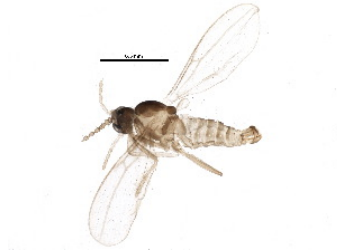

**BIOUG19538-A08 [Lateral]**  
Cecidomyiidae  
Family: Cecidomyiidae  
BIN URI: BOLD:ACT3394

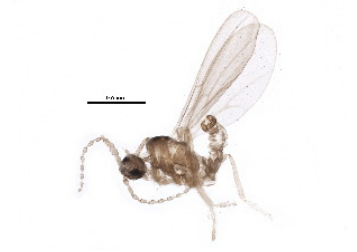

**BIOUG22452-G04 [Lateral]**  
Cecidomyiidae  
Family: Cecidomyiidae  
BIN URI: BOLD:ACV5392

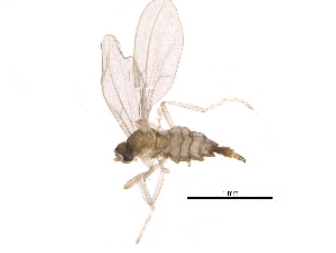

**BIOUG22328-A11 [Lateral]**  
Cecidomyiidae  
Family: Cecidomyiidae  
BIN URI: BOLD:ACA8939

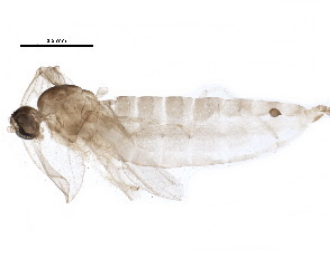

**BIOUG22467-H09 [Lateral]**  
Cecidomyiidae  
Family: Cecidomyiidae  
BIN URI: BOLD:ACV3777

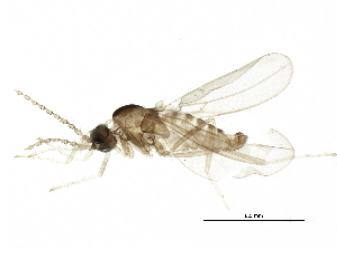

**BIOUG22459-E07 [Lateral]**  
Cecidomyiidae  
Family: Cecidomyiidae  
BIN URI: BOLD:AAN5229

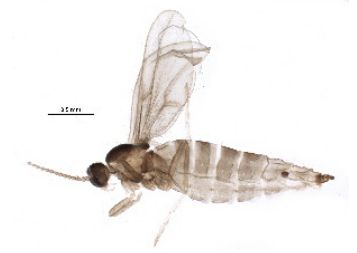

**BIOUG22716-C01 [Lateral]**  
Cecidomyiidae  
Family: Cecidomyiidae  
BIN URI: BOLD:ACV5162

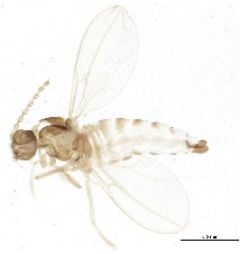

**BIOUG01696-C02 [Lateral]**  
Cecidomyiidae  
Family: Cecidomyiidae  
BIN URI: BOLD:ABV1292

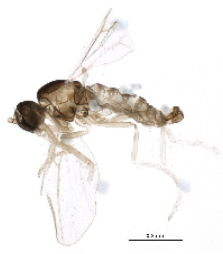

**BIOUG22084-H01 [Lateral]**  
Cecidomyiidae  
Family: Cecidomyiidae  
BIN URI: BOLD:ABX8236

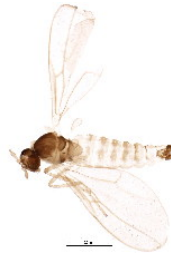

**BIOUG01450-H07 [Lateral]**  
Cecidomyiidae  
Family: Cecidomyiidae  
BIN URI: BOLD:ACF0765

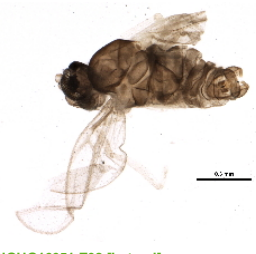

**BIOUG16051-E08 [Lateral]**  
Cecidomyiidae  
Family: Cecidomyiidae  
BIN URI: BOLD:ACK1651

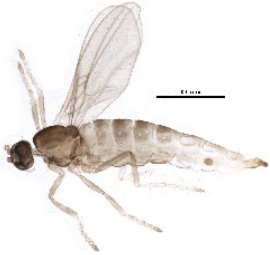

**BIOUG22721-B11 [Lateral]**  
Cecidomyiidae  
Family: Cecidomyiidae  
BIN URI: BOLD:ACV5841

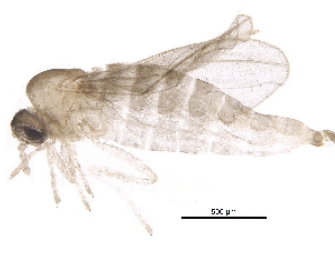

**BIOUG23086-G08 [Lateral]**  
Cecidomyiidae  
Family: Cecidomyiidae  
BIN URI: BOLD:ACW1120

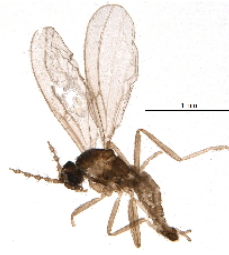

**BIOUG08481-C04 [Lateral]**  
Cecidomyiidae  
Family: Cecidomyiidae  
BIN URI: BOLD:ACJ9045

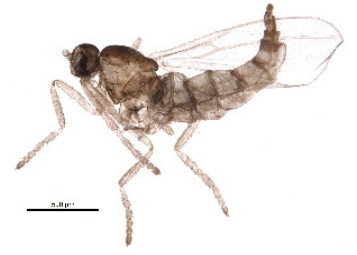

**BIOUG22352-C05 [Lateral]**  
Cecidomyiidae  
Family: Cecidomyiidae  
BIN URI: BOLD:ACV3604

IMAGE NOT AVAILABLE

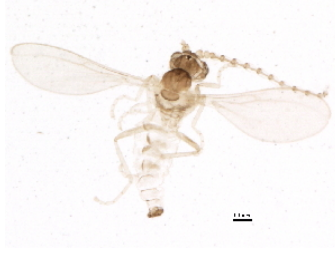

**BIOUG01667-A02 [Dorsal]**  
Cecidomyiidae  
Family: Cecidomyiidae  
BIN URI: BOLD:ABA6489

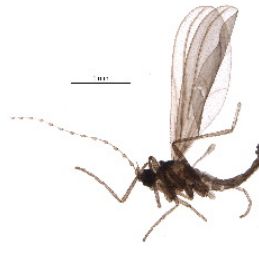

**BIOUG22353-G01 [Lateral]**  
Cecidomyiidae  
Family: Cecidomyiidae  
BIN URI: BOLD:AAP5343

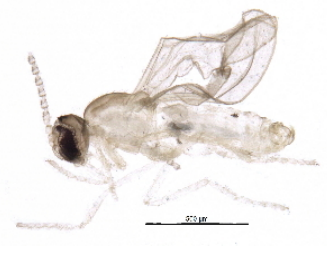

**BIOUG09483-D12 [Lateral]**  
Cecidomyiidae  
Family: Cecidomyiidae  
BIN URI: BOLD:ACK2532

**BIOUG23316-B10**  
Cecidomyiidae  
Family: Cecidomyiidae

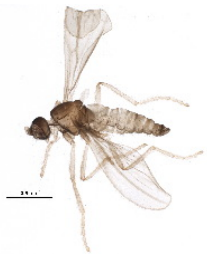

**BIOUG19792-F09 [Lateral]**  
Cecidomyiidae  
Family: Cecidomyiidae  
BIN URI: BOLD:ACS9522

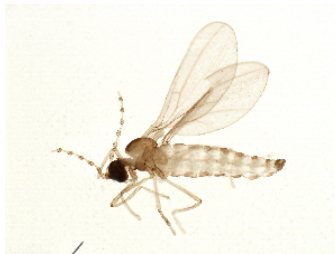

**BIOUG01589-G09 [Lateral]**  
Cecidomyiidae  
Family: Cecidomyiidae  
BIN URI: BOLD:AAN5204

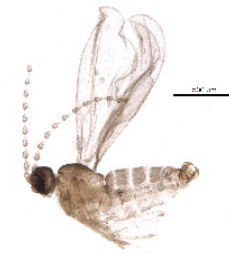

**BIOUG23075-F12 [Lateral]**  
Cecidomyiidae  
Family: Cecidomyiidae  
BIN URI: BOLD:ACV5281

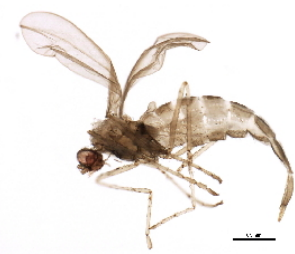

**BIOUG01123-D03 [Lateral]**  
Cecidomyiidae  
Family: Cecidomyiidae  
BIN URI: BOLD:AAY6383

IMAGE NOT AVAILABLE

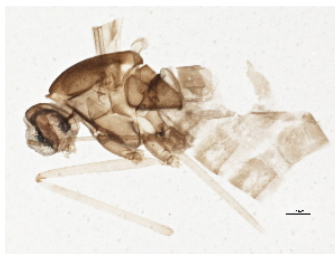

**BIOUG02853-A02 [Lateral]**  
Cecidomyiidae  
Family: Cecidomyiidae  
BIN URI: BOLD:ACB1654

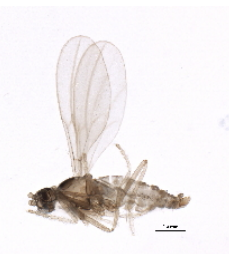

**BIOUG16095-H05 [Lateral]**  
Cecidomyiidae  
Family: Cecidomyiidae  
BIN URI: BOLD:ACK3803

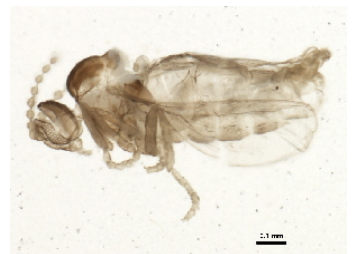

**BIOUG01128-D04 [Lateral]**  
Cecidomyiidae  
Family: Cecidomyiidae  
BIN URI: BOLD:AAV5796

**BIOUG23188-G07**  
Cecidomyiidae  
Family: Cecidomyiidae



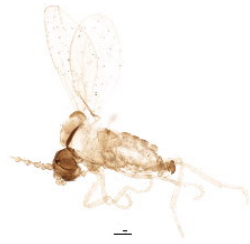

**BIOUG01613-E04 [Lateral]**  
Cecidomyiidae  
Family: Cecidomyiidae  
BIN URI: BOLD:ABV1310

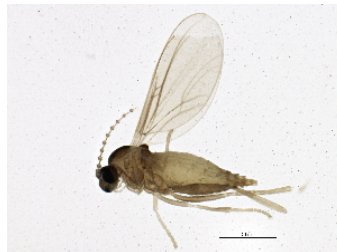

**BIOUG02006-B04 [Lateral]**  
Cecidomyiidae  
Family: Cecidomyiidae  
BIN URI: BOLD:ACB3033

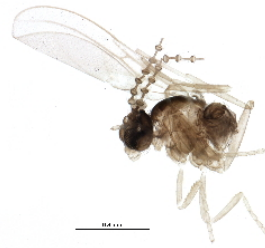

**BIOUG22366-F03 [Lateral]**  
Cecidomyiidae  
Family: Cecidomyiidae  
BIN URI: BOLD:ACV3619

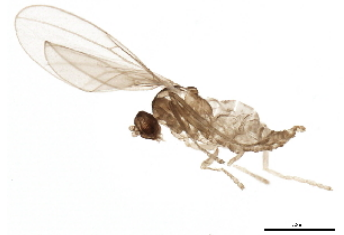

**10PHMAL-1611 [Lateral]**  
Cecidomyiidae  
Family: Cecidomyiidae  
BIN URI: BOLD:AA5283

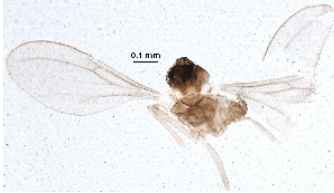

**BIOUG06993-C10 [Lateral]**  
Cecidomyiidae  
Family: Cecidomyiidae  
BIN URI: BOLD:ACI6072

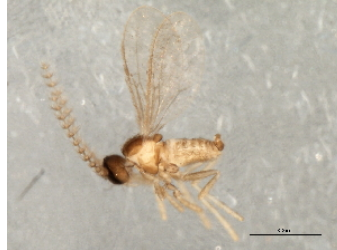

**08TTML-1674 [Lateral]**  
Cecidomyiidae  
Family: Cecidomyiidae  
BIN URI: BOLD:AA5259

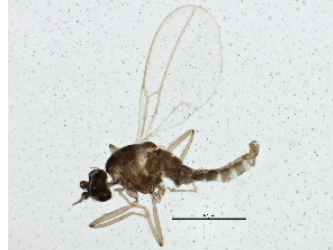

**BIOUG03440-B08 [Lateral]**  
Cecidomyiidae  
Family: Cecidomyiidae  
BIN URI: BOLD:ABV1330

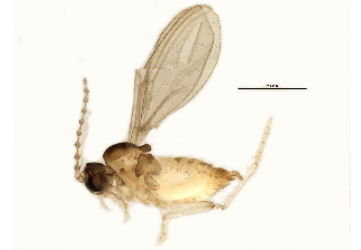

**BIOUG06926-H09 [Lateral]**  
Cecidomyiidae  
Family: Cecidomyiidae  
BIN URI: BOLD:ACI5626

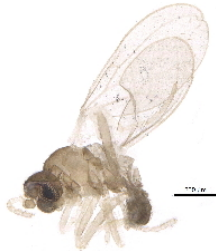

**BIOUG23308-D03 [Lateral]**  
Cecidomyiidae  
Family: Cecidomyiidae  
BIN URI: BOLD:ACW1306

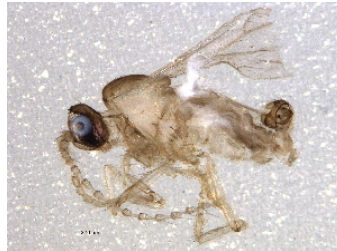

**BIOUG04313-G06 [Lateral]**  
Cecidomyiidae  
Family: Cecidomyiidae  
BIN URI: BOLD:ACC8700

**IMAGE NOT AVAILABLE**

**BIOUG22299-D11**  
Cecidomyiidae  
Family: Cecidomyiidae

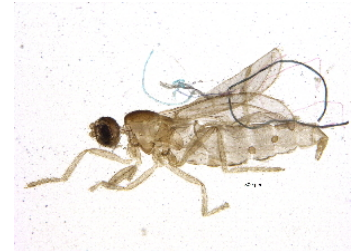

**BIOUG03733-G11 [Lateral]**  
Cecidomyiidae  
Family: Cecidomyiidae  
BIN URI: BOLD:ACC9182

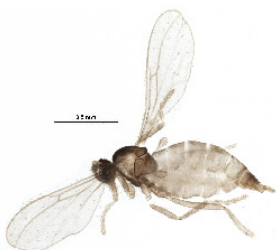

**BIOUG22291-E10 [Lateral]**  
Cecidomyiidae  
Family: Cecidomyiidae  
BIN URI: BOLD:AA5267

**IMAGE NOT AVAILABLE**

**BIOUG22463-E04**  
Cecidomyiidae  
Family: Cecidomyiidae

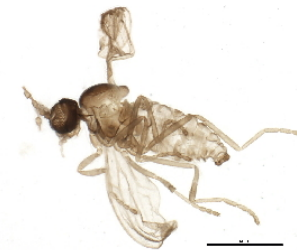

**BIOUG01117-H04 [Lateral]**  
Cecidomyiidae  
Family: Cecidomyiidae  
BIN URI: BOLD:AAU6597

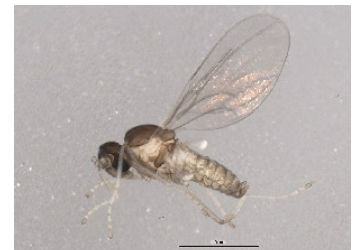

**10JSROW-0688 [Lateral]**  
Cecidomyiidae  
Family: Cecidomyiidae  
BIN URI: BOLD:AAV5355

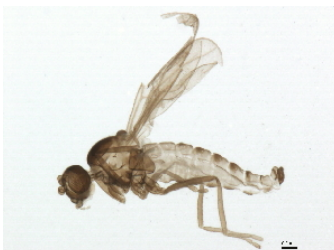

**BIOUG01448-F08 [Lateral]**  
Cecidomyiidae  
Family: Cecidomyiidae  
BIN URI: BOLD:ABA7887

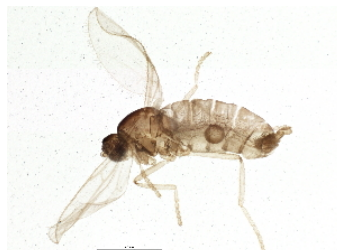

**BIOUG04290-H04 [Lateral]**  
Cecidomyiidae  
Family: Cecidomyiidae  
BIN URI: BOLD:ACD0690

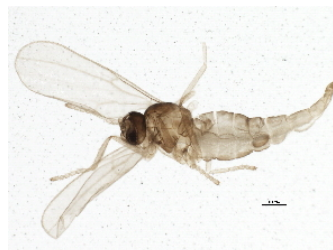

**BIOUG02668-D12 [Lateral]**  
Cecidomyiidae  
Family: Cecidomyiidae  
BIN URI: BOLD:ABV9278

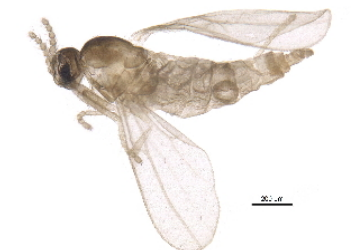

**BIOUG23080-E09 [Lateral]**  
Cecidomyiidae  
Family: Cecidomyiidae  
BIN URI: BOLD:ACW0708

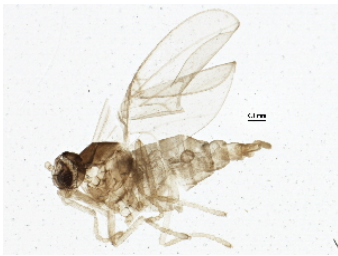

**BIOUG03371-H07 [Lateral]**  
Cecidomyiidae  
Family: Cecidomyiidae  
BIN URI: BOLD:ACC8238

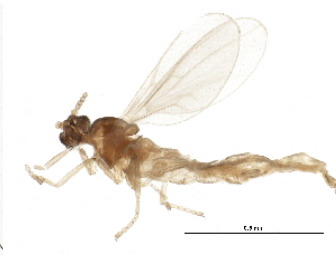

**BIOUG23188-H01 [Lateral]**  
Cecidomyiidae  
Family: Cecidomyiidae  
BIN URI: BOLD:ACB3240

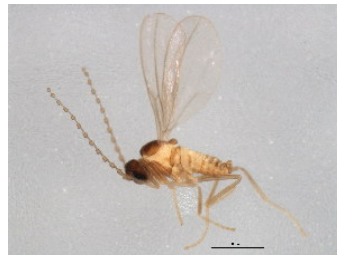

**BIOUG00826-A11 [Lateral]**  
Cecidomyiidae  
Family: Cecidomyiidae  
BIN URI: BOLD:AAN5269

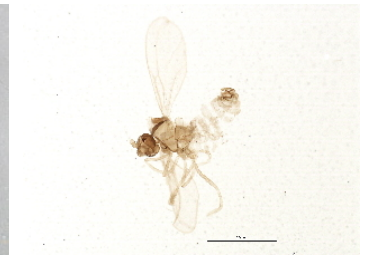

**BIOUG01592-D08 [Lateral]**  
Cecidomyiidae  
Family: Cecidomyiidae  
BIN URI: BOLD:AAH2876

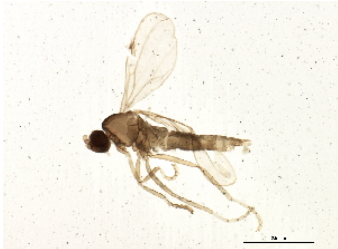

**BIOUG01142-A07 [Lateral]**  
Cecidomyiidae  
Family: Cecidomyiidae  
BIN URI: BOLD:AAU6598

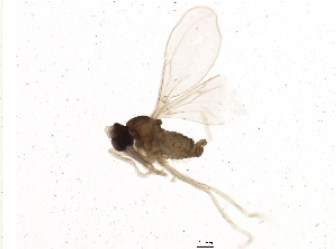

**BIOUG01125-A05 [Lateral]**  
Cecidomyiidae  
Family: Cecidomyiidae  
BIN URI: BOLD:AAV5788

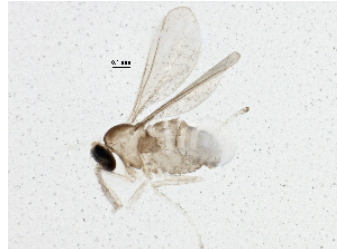

**BIOUG03440-A05 [Lateral]**  
Cecidomyiidae  
Family: Cecidomyiidae  
BIN URI: BOLD:ACC8554

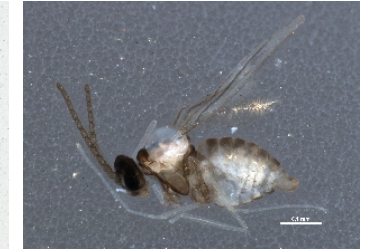

**BIOUG11220-F03 [Lateral]**  
Cecidomyiidae  
Family: Cecidomyiidae  
BIN URI: BOLD:ACD1623

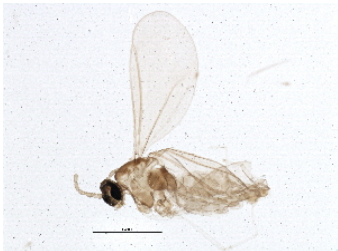

**BIOUG06265-E09 [Lateral]**  
Cecidomyiidae  
Family: Cecidomyiidae  
BIN URI: BOLD:ACA8582

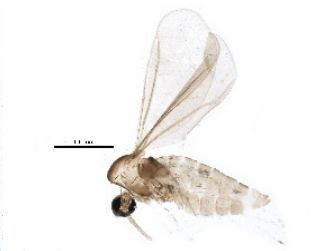

**BIOUG22470-E10 [Lateral]**  
Cecidomyiidae  
Family: Cecidomyiidae  
BIN URI: BOLD:ACG3539

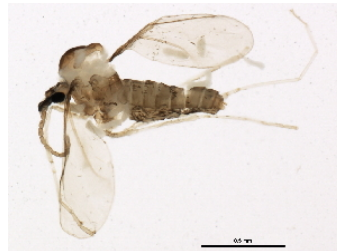

**BIOUG01130-H07 [Lateral]**  
Cecidomyiidae  
Family: Cecidomyiidae  
BIN URI: BOLD:ABY9434

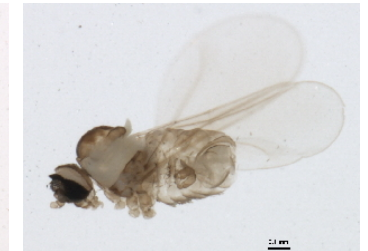

**BIOUG01305-C01 [Lateral]**  
Cecidomyiidae  
Family: Cecidomyiidae  
BIN URI: BOLD:AAV6430

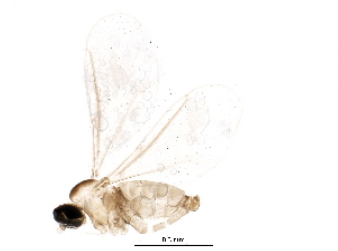

**BIOUG22861-A04 [Lateral]**  
Cecidomyiidae  
Family: Cecidomyiidae  
BIN URI: BOLD:ACN2134

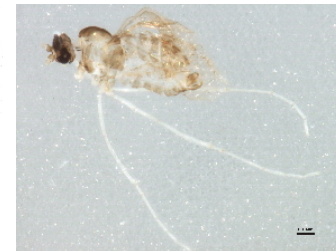

**BIOUG01482-G08 [Lateral]**  
Cecidomyiidae  
Family: Cecidomyiidae  
BIN URI: BOLD:ABV1470

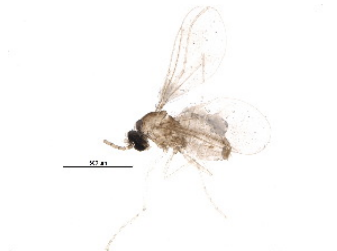

**BIOUG20846-E08 [Lateral]**  
Diptera  
BIN URI: BOLD:ACU5703

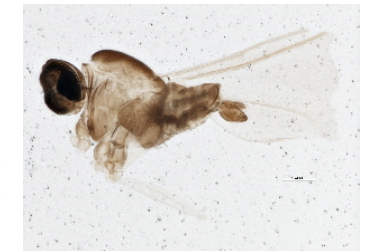

**BIOUG02939-F04 [Lateral]**  
Cecidomyiidae  
Family: Cecidomyiidae  
BIN URI: BOLD:ACA5795

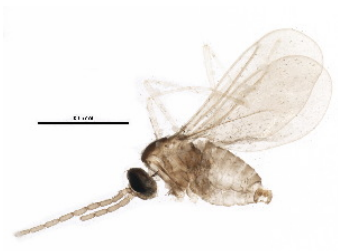

**BIOUG23073-E03 [Lateral]**  
Cecidomyiidae  
Family: Cecidomyiidae  
BIN URI: BOLD:ACV0232

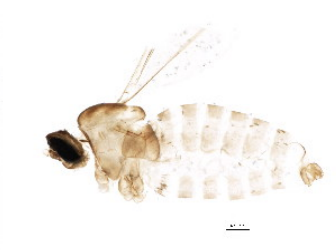

**BIOUG01510-A04 [Lateral]**  
Cecidomyiidae  
Family: Cecidomyiidae  
BIN URI: BOLD:ABW8020

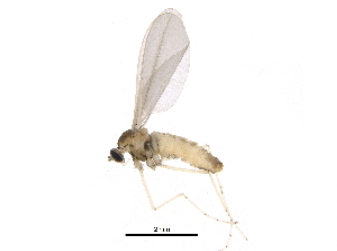

**BIOUG22876-E03 [Lateral]**  
Cecidomyiidae  
Family: Cecidomyiidae  
BIN URI: BOLD:ACW0970

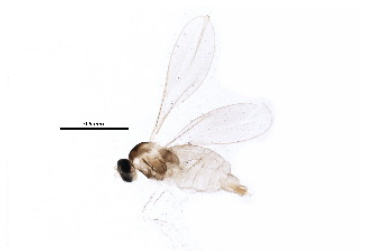

**BIOUG22466-F05 [Lateral]**  
Cecidomyiidae  
Family: Cecidomyiidae  
BIN URI: BOLD:AAM6039

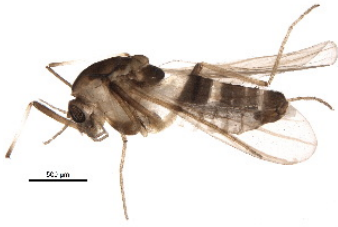

**BIOUG22237-A07 [Lateral]**  
Cecidomyiidae  
Family: Cecidomyiidae  
BIN URI: BOLD:ACW0899

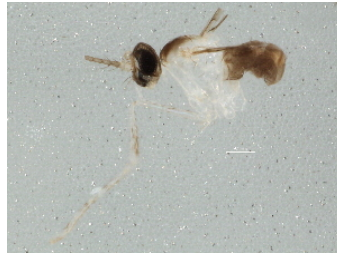

**BIOUG03825-D02 [Lateral]**  
Cecidomyiidae  
Family: Cecidomyiidae  
BIN URI: BOLD:ACB3003

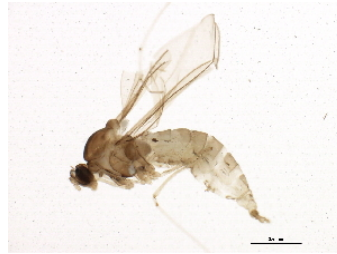

**BIOUG01128-A08 [Lateral]**  
Cecidomyiidae  
Family: Cecidomyiidae  
BIN URI: BOLD:AAZ0283

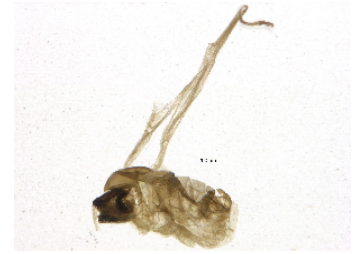

**BIOUG02917-G01 [Lateral]**  
Cecidomyiidae  
Family: Cecidomyiidae  
BIN URI: BOLD:ACA5223

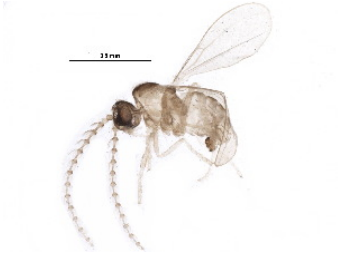

**BIOUG23077-H11 [Lateral]**  
Cecidomyiidae  
Family: Cecidomyiidae  
BIN URI: BOLD:ACD0161

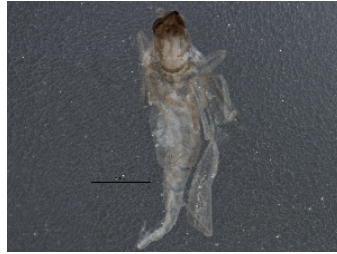

**BIOUG02918-G02 [Dorsal]**  
Cecidomyiidae  
Family: Cecidomyiidae  
BIN URI: BOLD:ACA4968

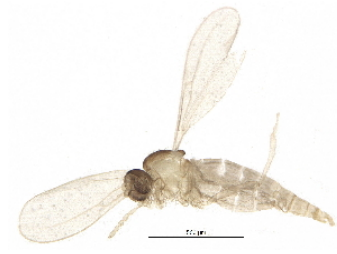

**BIOUG08234-A12 [Lateral]**  
Cecidomyiidae  
Family: Cecidomyiidae  
BIN URI: BOLD:ACR6587

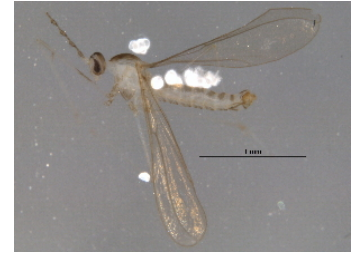

**BIOUG03272-B02 [Lateral]**  
Cecidomyiidae  
Family: Cecidomyiidae  
BIN URI: BOLD:AAV5570

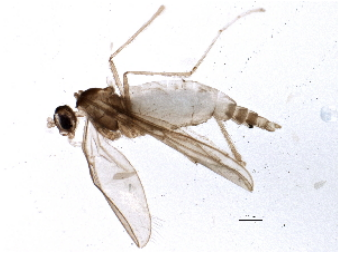

**BIOUG04314-F11 [Lateral]**  
Cecidomyiidae  
Family: Cecidomyiidae  
BIN URI: BOLD:ACD1979

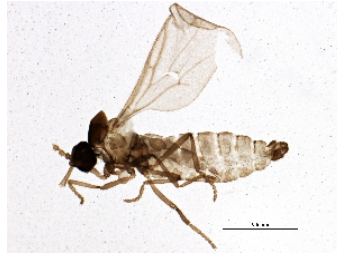

**BIOUG01886-H04 [Lateral]**  
Cecidomyiidae  
Family: Cecidomyiidae  
BIN URI: BOLD:ABW2703

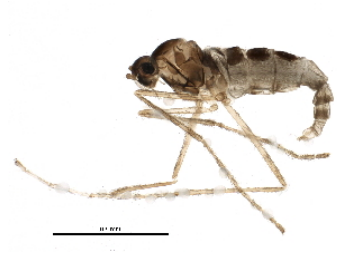

**BIOUG23073-C02 [Lateral]**  
Cecidomyiidae  
Family: Cecidomyiidae  
BIN URI: BOLD:ACV5271

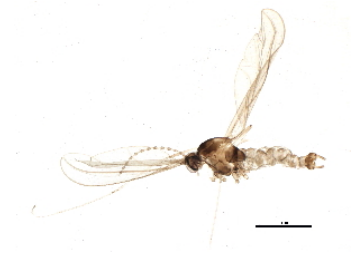

**BIOUG10320-B01 [Lateral]**  
Cecidomyiidae  
Family: Cecidomyiidae  
BIN URI: BOLD:ACL4997

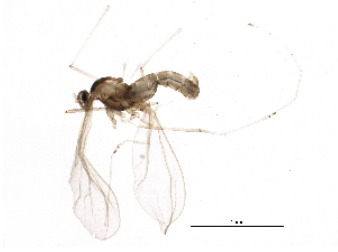

**BIOUG22359-B06 [Lateral]**  
Cecidomyiidae  
Family: Cecidomyiidae  
BIN URI: BOLD:ACV3779

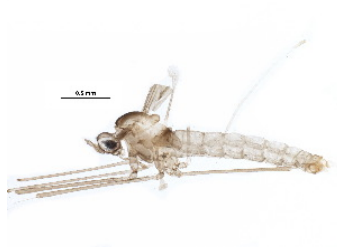

**BIOUG22466-E12 [Lateral]**  
Cecidomyiidae  
Family: Cecidomyiidae  
BIN URI: BOLD:ACV4682

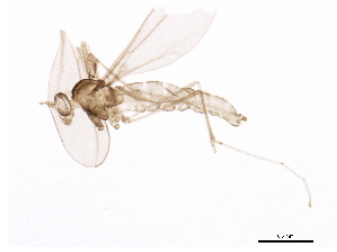

**BIOUG01444-D05 [Lateral]**  
Cecidomyiidae  
Family: Cecidomyiidae  
BIN URI: BOLD:ABV0470

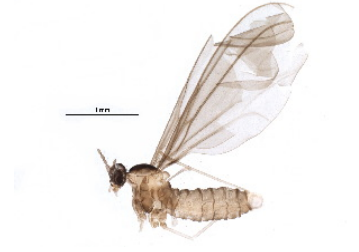

**BIOUG22730-B09 [Lateral]**  
Cecidomyiidae  
Family: Cecidomyiidae  
BIN URI: BOLD:ACV6013

**IMAGE NOT AVAILABLE**

**IMAGE NOT AVAILABLE**

**BIOUG23083-G11**  
Cecidomyiidae  
Family: Cecidomyiidae

**BIOUG23315-C08**  
Cecidomyiidae  
Family: Cecidomyiidae

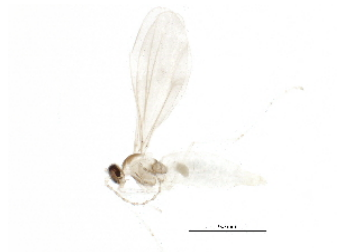

**BIOUG22729-F07 [Lateral]**  
Cecidomyiidae  
Family: Cecidomyiidae  
BIN URI: BOLD:ABV0498

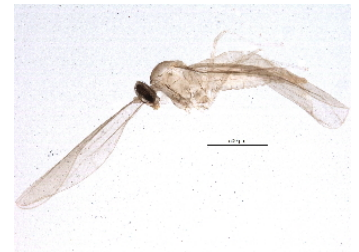

**BIOUG06486-B04 [Lateral]**  
Cecidomyiidae  
Family: Cecidomyiidae  
BIN URI: BOLD:AC15405

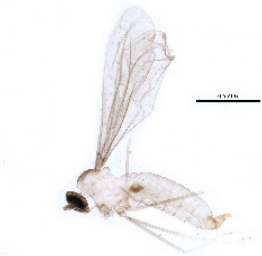

**BIOUG23077-D02 [Lateral]**  
Cecidomyiidae  
Family: Cecidomyiidae  
BIN URI: BOLD:ACV5829

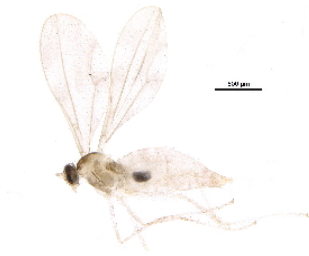

**BIOUG23080-H05 [Lateral]**  
Cecidomyiidae  
Family: Cecidomyiidae  
BIN URI: BOLD:ABV1389

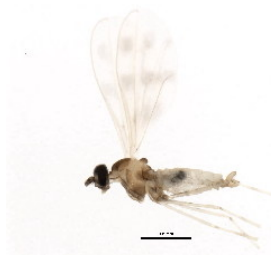

**BIOUG01345-E04 [Lateral]**  
Cecidomyiidae  
Family: Cecidomyiidae  
BIN URI: BOLD:AAN5235

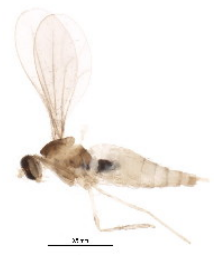

**BIOUG01389-E06 [Lateral]**  
Cecidomyiidae  
Family: Cecidomyiidae  
BIN URI: BOLD:ABX3660

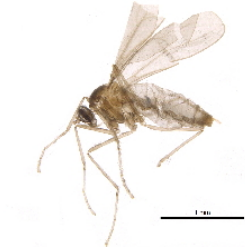

**BIOUG22328-D05 [Lateral]**  
Cecidomyiidae  
Family: Cecidomyiidae  
BIN URI: BOLD:ACV2090

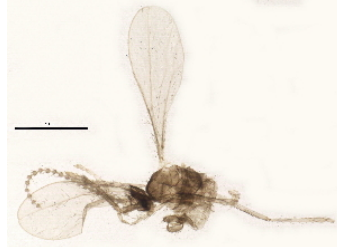

**BIOUG08624-B01 [Lateral]**  
Cecidomyiidae  
Family: Cecidomyiidae  
BIN URI: BOLD:ABW8049

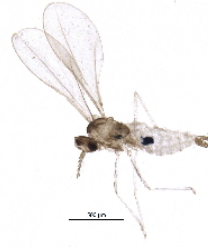

**BIOUG08607-C05 [Lateral]**  
Cecidomyiidae  
Family: Cecidomyiidae  
BIN URI: BOLD:ACK2390

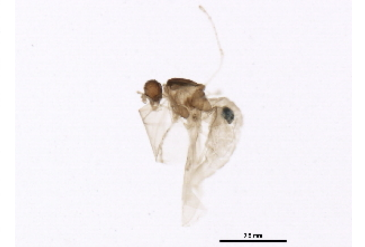

**BIOUG01120-H01 [Lateral]**  
Cecidomyiidae  
Family: Cecidomyiidae  
BIN URI: BOLD:AAV6471

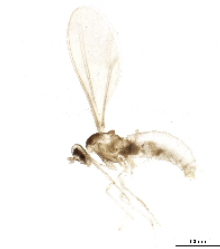

**BIOUG22365-A03 [Lateral]**  
Cecidomyiidae  
Family: Cecidomyiidae  
BIN URI: BOLD:ACI8549

**IMAGE NOT AVAILABLE**

**BIOUG23081-H10**  
Cecidomyiidae  
Family: Cecidomyiidae

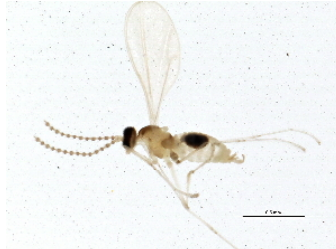

**08TTML-2485 [Lateral]**  
Cecidomyiidae  
Family: Cecidomyiidae  
BIN URI: BOLD:AAN5282

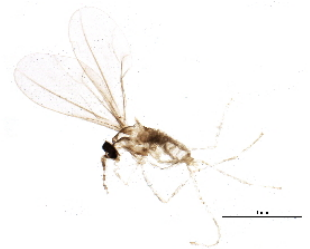

**BIOUG08712-C04 [Lateral]**  
Cecidomyiidae  
Family: Cecidomyiidae  
BIN URI: BOLD:ACK2599

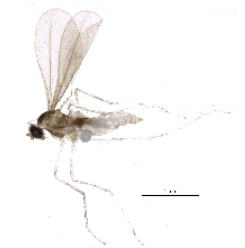

**BIOUG11883-C07 [Lateral]**  
Cecidomyiidae  
Family: Cecidomyiidae  
BIN URI: BOLD:ACM9802

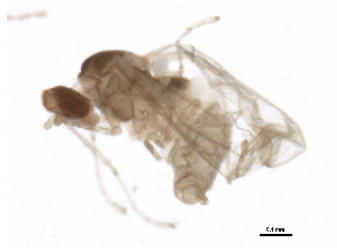

**BIOUG01142-B08 [Lateral]**  
Cecidomyiidae  
Family: Cecidomyiidae  
BIN URI: BOLD:AAH3740

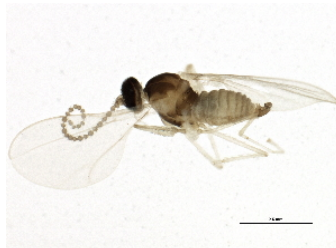

**BIOUG01982-D08 [Lateral]**  
Cecidomyiidae  
Family: Cecidomyiidae  
BIN URI: BOLD:AAM6107

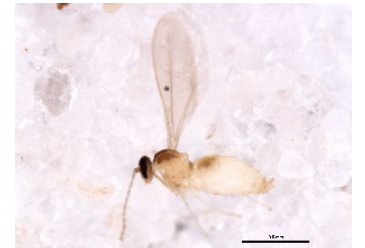

**09BBEDI-2807 [Lateral]**  
Cecidomyiidae  
Family: Cecidomyiidae  
BIN URI: BOLD:AAN5186

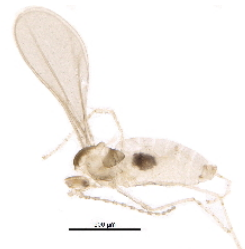

**BIOUG22719-B08 [Lateral]**  
Cecidomyiidae  
Family: Cecidomyiidae  
BIN URI: BOLD:AAV5575

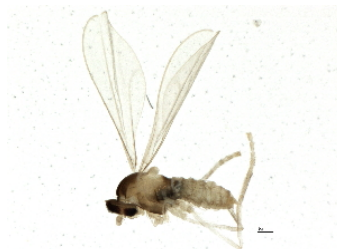

**BIOUG02056-A08 [Lateral]**  
Cecidomyiidae  
Family: Cecidomyiidae  
BIN URI: BOLD:AAN5193

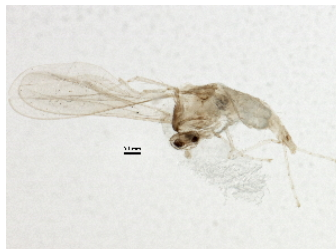

**BIOUG03437-C01 [Lateral]**  
Cecidomyiidae  
Family: Cecidomyiidae  
BIN URI: BOLD:ABV0448

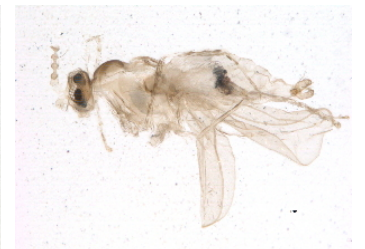

**BIOUG03758-F09 [Lateral]**  
Cecidomyiidae  
Family: Cecidomyiidae  
BIN URI: BOLD:ABV1261

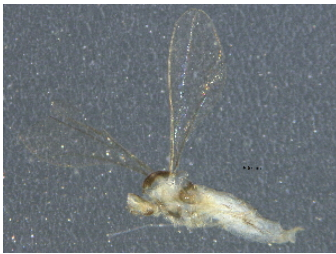

**BIOUG04661-D08 [Lateral]**  
Cecidomyiidae  
Family: Cecidomyiidae  
BIN URI: BOLD:ACC8599

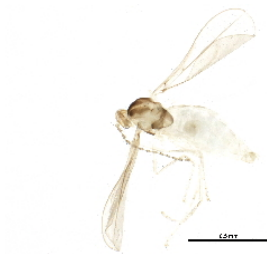

**BIOUG22716-H01 [Lateral]**  
Cecidomyiidae  
Family: Cecidomyiidae  
BIN URI: BOLD:AAH3717

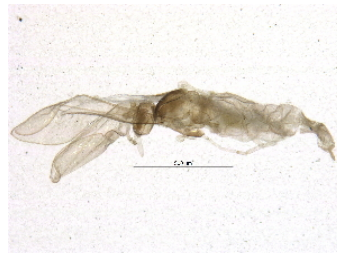

**BIOUG03900-D06 [Lateral]**  
Cecidomyiidae  
Family: Cecidomyiidae  
BIN URI: BOLD:AAH3751

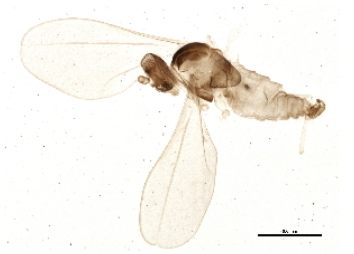

**BIOUG02903-H07 [Lateral]**  
Cecidomyiidae  
Family: Cecidomyiidae  
BIN URI: BOLD:ABW8040

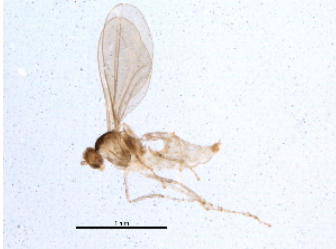

**BIOUG04480-G04 [Lateral]**  
Cecidomyiidae  
Family: Cecidomyiidae  
BIN URI: BOLD:ACD1757

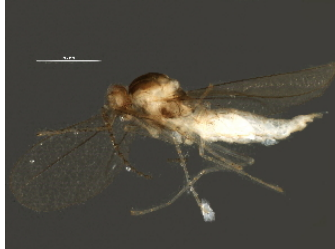

**BIOUG08603-G03 [Lateral]**  
Cecidomyiidae  
Family: Cecidomyiidae  
BIN URI: BOLD:ACK1765

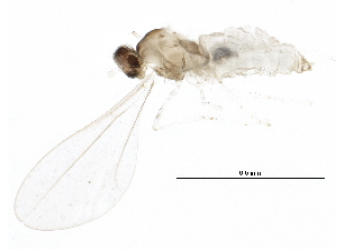

**BIOUG22084-H06 [Lateral]**  
Cecidomyiidae  
Family: Cecidomyiidae  
BIN URI: BOLD:ABY0682

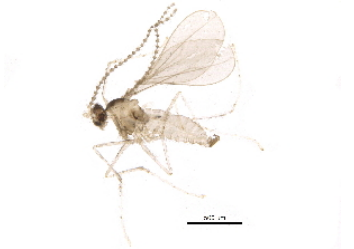

**BIOUG22719-C08 [Lateral]**  
Cecidomyiidae  
Family: Cecidomyiidae  
BIN URI: BOLD:ACV3513

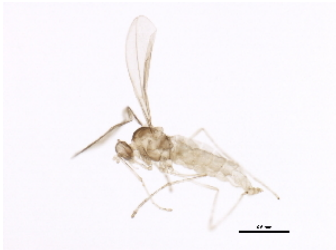

**BIOUG01120-H10 [Lateral]**  
Cecidomyiidae  
Family: Cecidomyiidae  
BIN URI: BOLD:AA6468

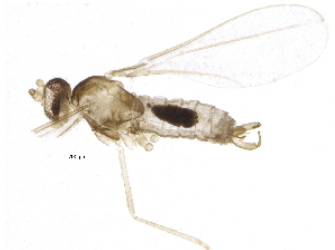

**BIOUG03238-E11 [Lateral]**  
Cecidomyiidae  
Family: Cecidomyiidae  
BIN URI: BOLD:ACB0715

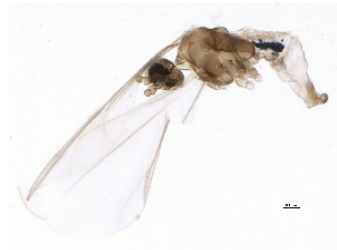

**BIOUG01491-H07 [Lateral]**  
Cecidomyiidae  
Family: Cecidomyiidae  
BIN URI: BOLD:AA6438

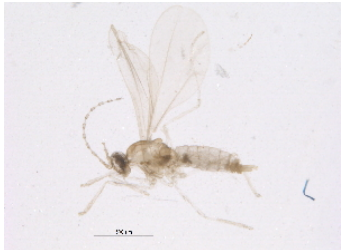

**BIOUG04835-H06 [Lateral]**  
Cecidomyiidae  
Family: Cecidomyiidae  
BIN URI: BOLD:ACD6132

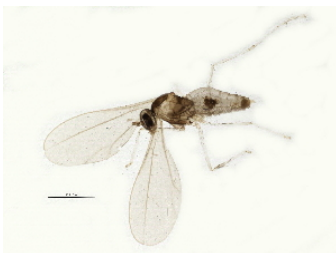

**BIOUG14095-G04 [Lateral]**  
Cecidomyiidae  
Family: Cecidomyiidae  
BIN URI: BOLD:ACD3287

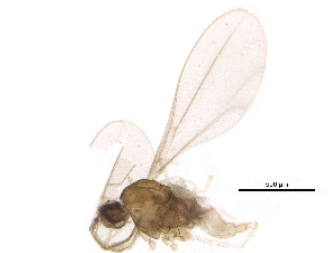

**BIOUG22719-A01 [Lateral]**  
Cecidomyiidae  
Family: Cecidomyiidae  
BIN URI: BOLD:ACI4196

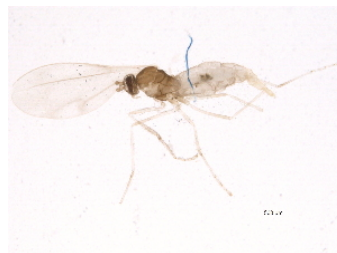

**BIOUG03954-B12 [Lateral]**  
Cecidomyiidae  
Family: Cecidomyiidae  
BIN URI: BOLD:ACD0329

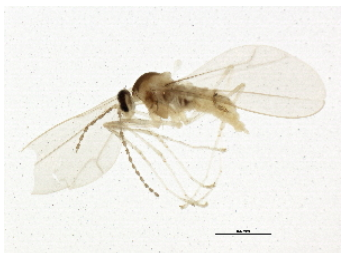

**BIOUG01982-D07 [Lateral]**  
Cecidomyiidae  
Family: Cecidomyiidae  
BIN URI: BOLD:AAH3720

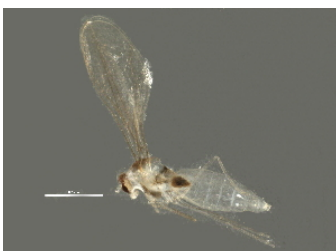

**BIOUG08603-C08 [Lateral]**  
Cecidomyiidae  
Family: Cecidomyiidae  
BIN URI: BOLD:AA6450

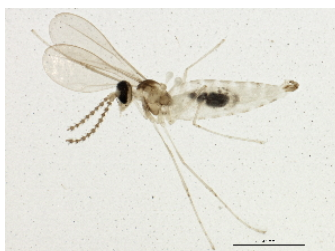

**BIOUG02006-A06 [Lateral]**  
Cecidomyiidae  
Family: Cecidomyiidae  
BIN URI: BOLD:AAH3742

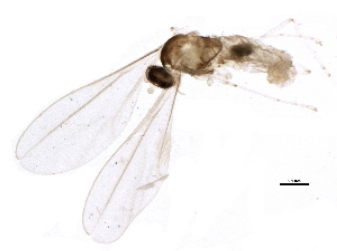

**BIOUG04314-F02 [Lateral]**  
Cecidomyiidae  
Family: Cecidomyiidae  
BIN URI: BOLD:AA6456

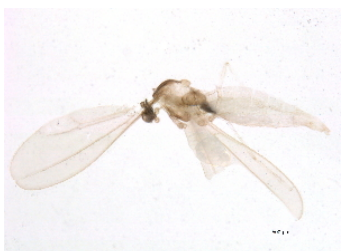

**BIOUG03758-A11 [Lateral]**  
Cecidomyiidae  
Family: Cecidomyiidae  
BIN URI: BOLD:ACC8702

IMAGE NOT AVAILABLE

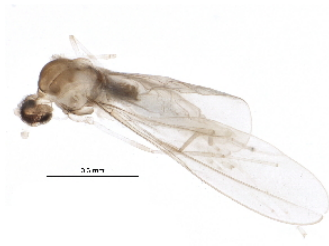

**BIOUG22730-G04**  
Cecidomyiidae  
Family: Cecidomyiidae  
BIN URI: BOLD:ACV5340

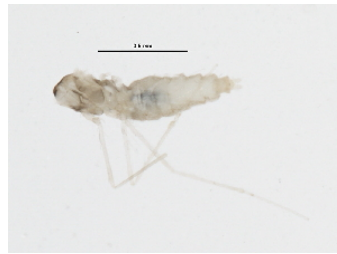

**BIOUG22733-C08 [Lateral]**  
Cecidomyiidae  
Family: Cecidomyiidae  
BIN URI: BOLD:ACV5422

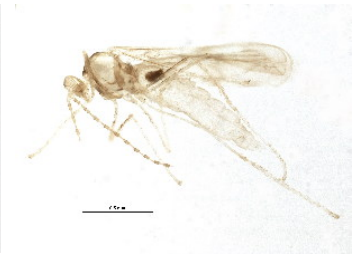

**10JSROW-1752 [Lateral]**  
Cecidomyiidae  
Family: Cecidomyiidae  
BIN URI: BOLD:AAV5356

**BIOUG01621-E05 [Lateral]**  
Cecidomyiidae  
Family: Cecidomyiidae  
BIN URI: BOLD:ABV1291

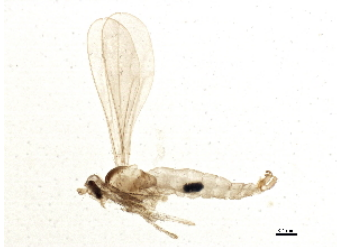

**BIOUG03066-B08 [Lateral]**  
Cecidomyiidae  
Family: Cecidomyiidae  
BIN URI: BOLD:ABV1337

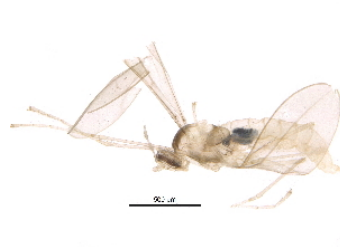

**BIOUG22328-A09 [Lateral]**  
Cecidomyiidae  
Family: Cecidomyiidae  
BIN URI: BOLD:ABV1379

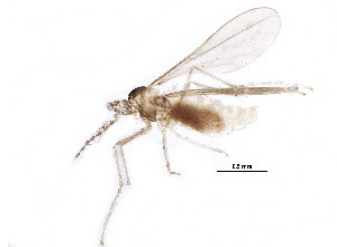

**BIOUG22417-F01 [Lateral]**  
Cecidomyiidae  
Family: Cecidomyiidae  
BIN URI: BOLD:ACV4577

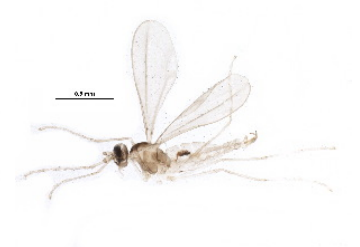

**BIOUG22721-H01 [Lateral]**  
Cecidomyiidae  
Family: Cecidomyiidae  
BIN URI: BOLD:ACV5221

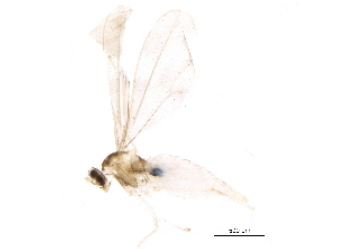

**BIOUG22323-D06 [Lateral]**  
Cecidomyiidae  
Family: Cecidomyiidae  
BIN URI: BOLD:AAV5793

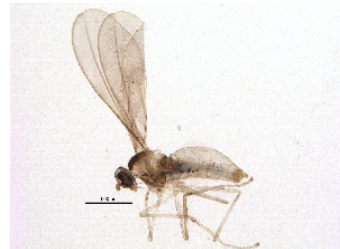

**BIOUG10277-B03 [Lateral]**  
Cecidomyiidae  
Family: Cecidomyiidae  
BIN URI: BOLD:ABX7420

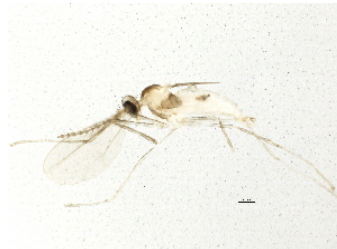

**BIOUG10401-D09 [Lateral]**  
Cecidomyiidae  
Family: Cecidomyiidae  
BIN URI: BOLD:ACC6635

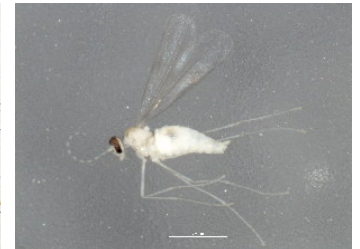

**BIOUG00819-F01 [Lateral]**  
Cecidomyiidae  
Family: Cecidomyiidae  
BIN URI: BOLD:AAQ0294

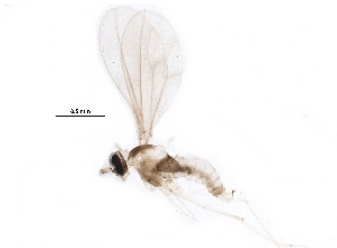

**BIOUG23077-E06 [Lateral]**  
Cecidomyiidae  
Family: Cecidomyiidae  
BIN URI: BOLD:ACF3884

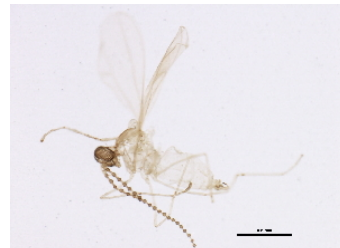

**BIOUG01118-F05 [Lateral]**  
Cecidomyiidae  
Family: Cecidomyiidae  
BIN URI: BOLD:AAV6442

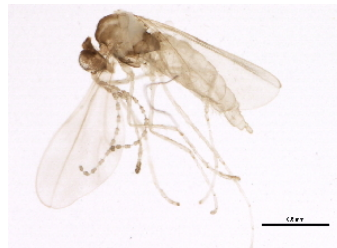

**BIOUG01128-C07 [Lateral]**  
Cecidomyiidae  
Family: Cecidomyiidae  
BIN URI: BOLD:AAZ0267

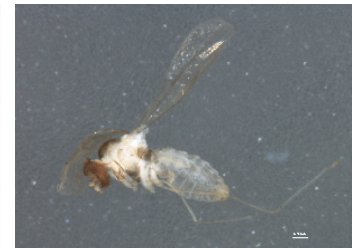

**BIOUG01132-G04 [Lateral]**  
Cecidomyiidae  
Family: Cecidomyiidae  
BIN URI: BOLD:AAZ0284

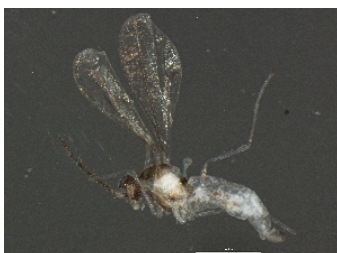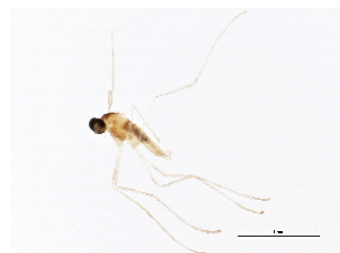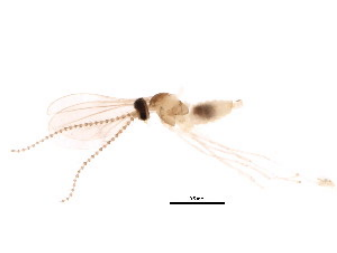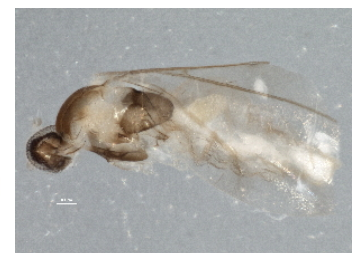

**BIOUG05170-G03 [Lateral]**  
Cecidomyiidae  
Family: Cecidomyiidae  
BIN URI: BOLD:ABV1390

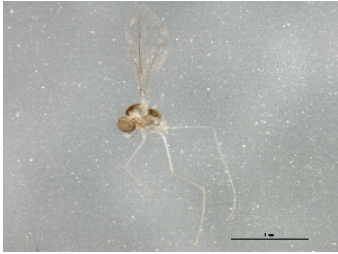

**08TTML-2490 [Lateral]**  
Cecidomyiidae  
Family: Cecidomyiidae  
BIN URI: BOLD:AAN5285

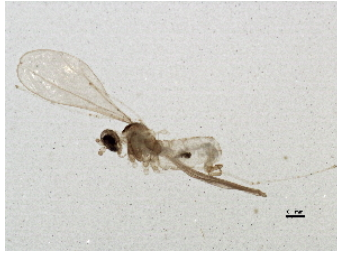

**BIOUG01400-G12 [Lateral]**  
Cecidomyiidae  
Family: Cecidomyiidae  
BIN URI: BOLD:ABX9467

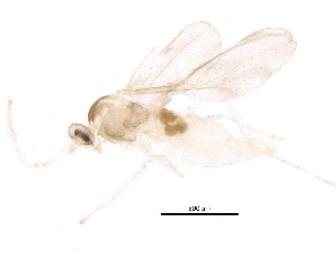

**BIOUG08687-F06 [Lateral]**  
Cecidomyiidae  
Family: Cecidomyiidae  
BIN URI: BOLD:ACJ6855

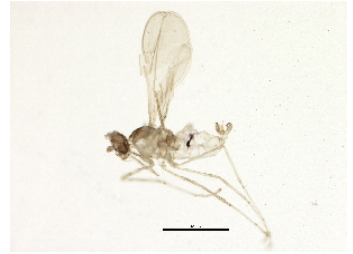

**BIOUG01479-H04 [Lateral]**  
Cecidomyiidae  
Family: Cecidomyiidae  
BIN URI: BOLD:ABV9362

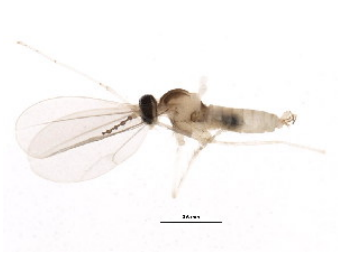

**BIOUG02998-G05 [Lateral]**  
Cecidomyiidae  
Family: Cecidomyiidae  
BIN URI: BOLD:ABA0863

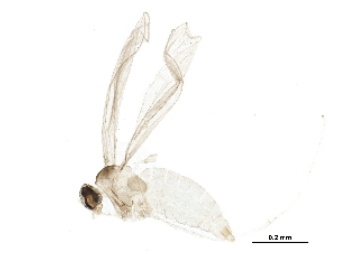

**BIOUG23079-H04 [Lateral]**  
Cecidomyiidae  
Family: Cecidomyiidae  
BIN URI: BOLD:ACS9320

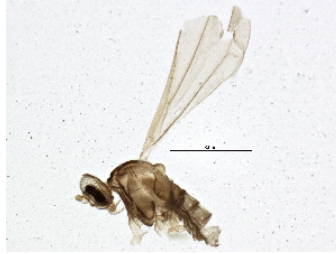

**BIOUG01116-F08 [Lateral]**  
Cecidomyiidae  
Family: Cecidomyiidae  
BIN URI: BOLD:ABZ3625

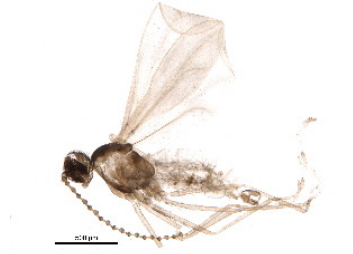

**BIOUG01352-C02 [Lateral]**  
Cecidomyiidae  
Family: Cecidomyiidae  
BIN URI: BOLD:AAH3755

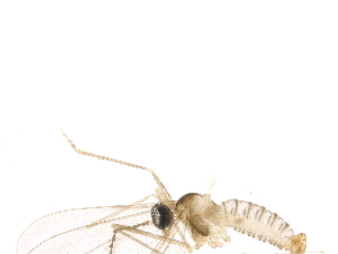

**BIOUG20831-B08 [Lateral]**  
Diptera  
BIN URI: BOLD:ACU7030

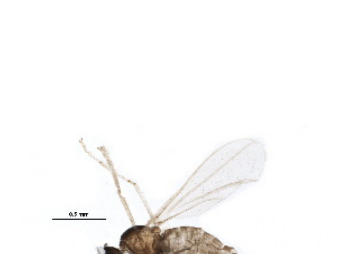

**BIOUG02513-D11 [Lateral]**  
Cecidomyiidae  
Family: Cecidomyiidae  
BIN URI: BOLD:ABW7897

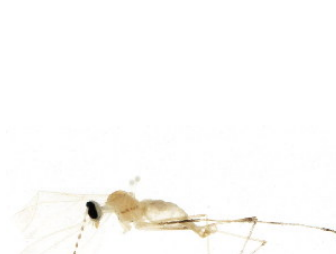

**BIOUG23083-C10 [Lateral]**  
Cecidomyiidae  
Family: Cecidomyiidae  
BIN URI: BOLD:ACW0955

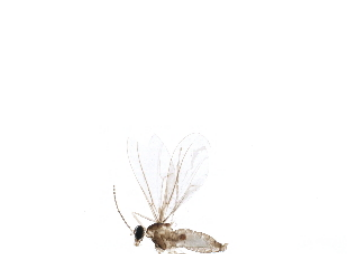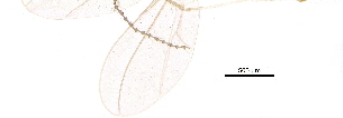

**BIOUG23081-A02 [Lateral]**  
Cecidomyiidae  
Family: Cecidomyiidae  
BIN URI: BOLD:ACW1081

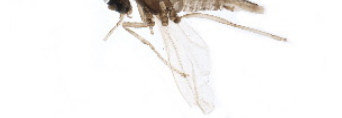

**BIOUG22470-F05 [Lateral]**  
Cecidomyiidae  
Family: Cecidomyiidae  
BIN URI: BOLD:ACV3873

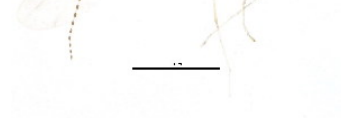

**BIOUG01337-B08 [Lateral]**  
Cecidomyiidae  
Family: Cecidomyiidae  
BIN URI: BOLD:ACM1807

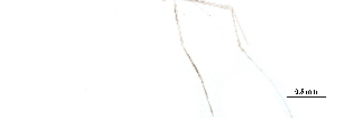

**BIOUG23323-E12 [Lateral]**  
Cecidomyiidae  
Family: Cecidomyiidae  
BIN URI: BOLD:ACW1131

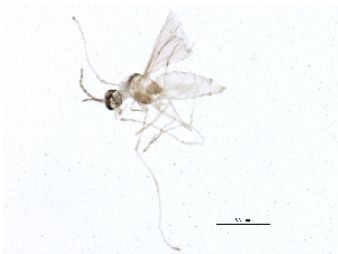

**BIOUG01117-G01 [Lateral]**  
Cecidomyiidae  
Family: Cecidomyiidae  
BIN URI: BOLD:AAU6476

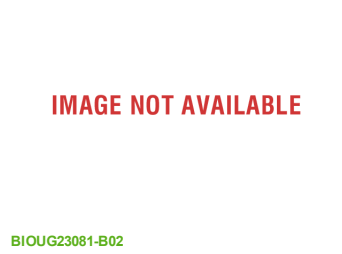

**BIOUG23081-B02**  
Cecidomyiidae  
Family: Cecidomyiidae

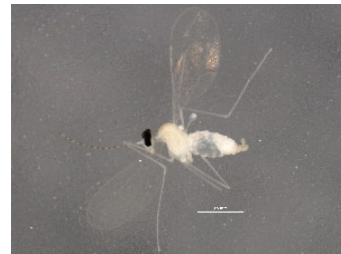

**BIOUG01423-F01 [Lateral]**  
Cecidomyiidae  
Family: Cecidomyiidae  
BIN URI: BOLD:AAH3741

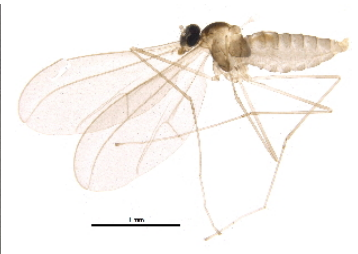

**BIOUG22328-A07 [Lateral]**  
Cecidomyiidae  
Family: Cecidomyiidae  
BIN URI: BOLD:AAQ0634

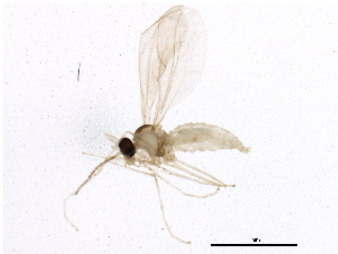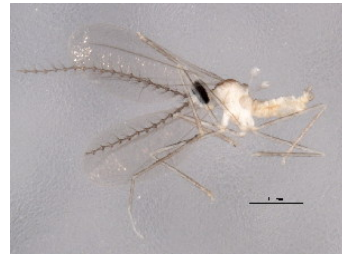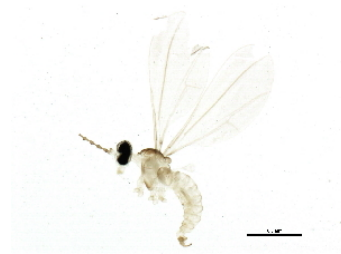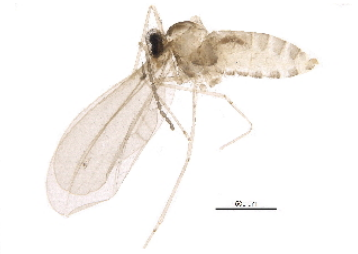

**BIOUG01131-G02 [Lateral]**  
Cecidomyiidae  
Family: Cecidomyiidae  
BIN URI: BOLD:AAy6445

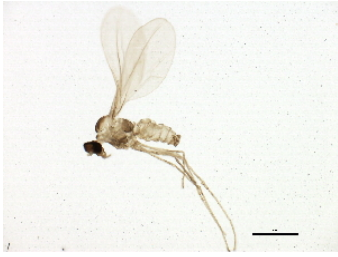

**BIOUG01116-G12 [Lateral]**  
Cecidomyiidae  
Family: Cecidomyiidae  
BIN URI: BOLD:AAN5212

**IMAGE NOT AVAILABLE**

**BIOUG23082-G12**  
Cecidomyiidae  
Family: Cecidomyiidae

**BIOUG00973-D07 [Lateral]**  
Cecidomyiidae  
Family: Cecidomyiidae  
BIN URI: BOLD:AAG8269

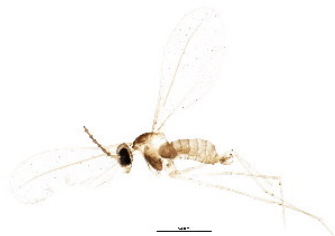

**BIOUG01510-E09 [Lateral]**  
Cecidomyiidae  
Family: Cecidomyiidae  
BIN URI: BOLD:ACK1667

**IMAGE NOT AVAILABLE**

**BIOUG23310-A01**  
Cecidomyiidae  
Family: Cecidomyiidae

**BIOUG01492-A09 [Lateral]**  
Cecidomyiidae  
Family: Cecidomyiidae  
BIN URI: BOLD:ABW6103

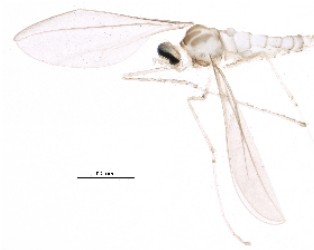

**BIOUG23072-D03 [Lateral]**  
Cecidomyiidae  
Family: Cecidomyiidae  
BIN URI: BOLD:ACV5229

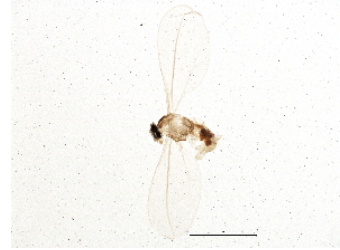

**BIOUG02906-F08 [Lateral]**  
Cecidomyiidae  
Family: Cecidomyiidae  
BIN URI: BOLD:ACB3134

**BIOUG23315-D04 [Lateral]**  
Cecidomyiidae  
Family: Cecidomyiidae  
BIN URI: BOLD:ACW0802

**IMAGE NOT AVAILABLE**

**BIOUG23084-E03**  
Cecidomyiidae  
Family: Cecidomyiidae

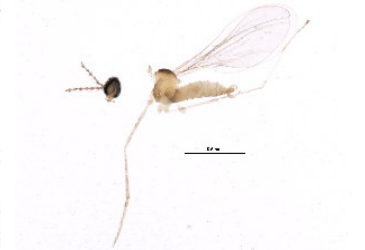

**BIOUG00978-D03 [Lateral]**  
Cecidomyiidae  
Family: Cecidomyiidae  
BIN URI: BOLD:AAy6112

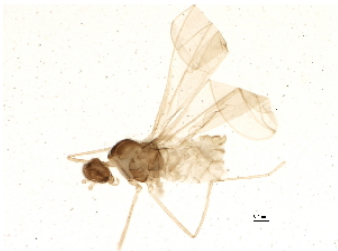

**BIOUG01132-A02 [Lateral]**  
Cecidomyiidae  
Family: Cecidomyiidae  
BIN URI: BOLD:AAM6116

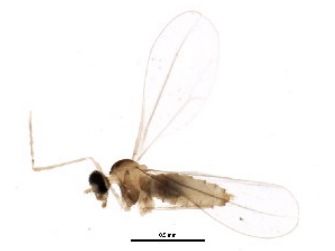

**BIOUG00978-E10 [Lateral]**  
Cecidomyiidae  
Family: Cecidomyiidae  
BIN URI: BOLD:AAN5181

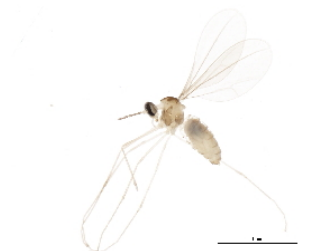

**08TTML-2488 [Lateral]**  
Cecidomyiidae  
Family: Cecidomyiidae  
BIN URI: BOLD:ACE3371

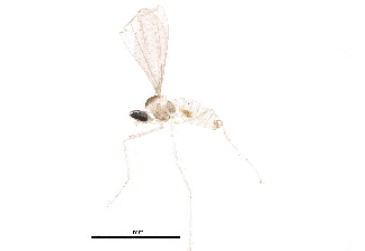

**BIOUG23314-C12 [Lateral]**  
Asteromyia  
Family: Cecidomyiidae  
BIN URI: BOLD:ACW1255

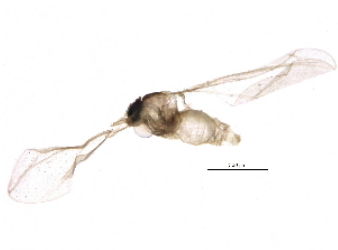

**BIOUG09715-C06 [Lateral]**  
Asteromyia  
Family: Cecidomyiidae  
BIN URI: BOLD:ACL5259

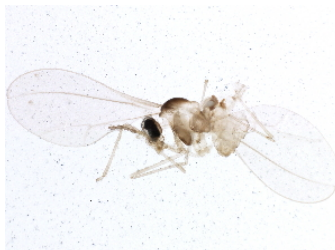

**BIOUG10453-F06 [Lateral]**  
Asteromyia  
Family: Cecidomyiidae  
BIN URI: BOLD:ACL6776

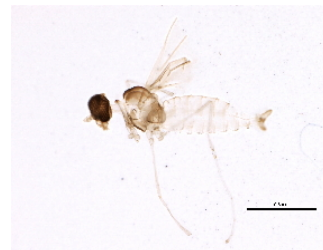

**BIOUG01446-A01 [Lateral]**  
Cecidomyiidae  
Family: Cecidomyiidae  
BIN URI: BOLD:AAN5223

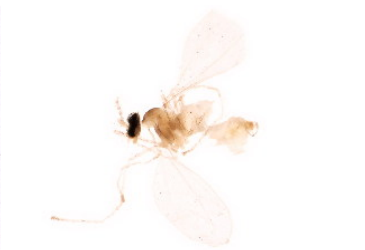

**BIOUG01460-A05 [Lateral]**  
Cecidomyiidae  
Family: Cecidomyiidae  
BIN URI: BOLD:ACC5677

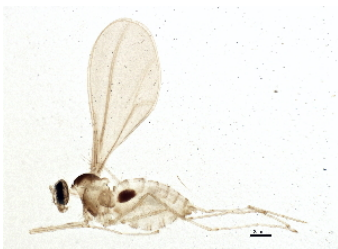

**BIOUG23078-A06**

**IMAGE NOT AVAILABLE**

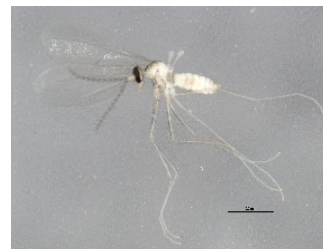

**BIOUG23308-E09**

**IMAGE NOT AVAILABLE**



BIOUG03278-B07 [Lateral]  
Asteromyia  
Family: Cecidomyiidae  
BIN URI: BOLD:AAV5552

IMAGE NOT AVAILABLE

BIOUG22452-B07  
Cecidomyiidae  
Family: Cecidomyiidae

Cecidomyiidae  
Family: Cecidomyiidae

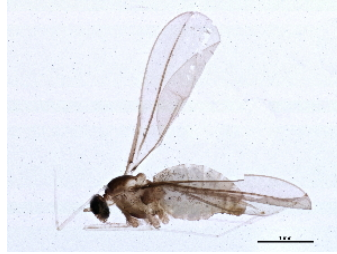

BIOUG03094-G12 [Lateral]  
Cecidomyiidae  
Family: Cecidomyiidae  
BIN URI: BOLD:ACC1334

BIOUG00819-D05 [Lateral]  
Cecidomyiidae  
Family: Cecidomyiidae  
BIN URI: BOLD:AAM6037

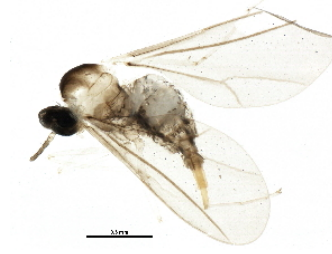

BIOUG22365-F09 [Lateral]  
Cecidomyiidae  
Family: Cecidomyiidae  
BIN URI: BOLD:ACV4726

Cecidomyiidae  
Family: Cecidomyiidae

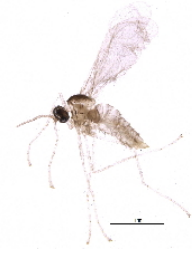

BIOUG11363-H02 [Lateral]  
Cecidomyiidae  
Family: Cecidomyiidae  
BIN URI: BOLD:ACM2941

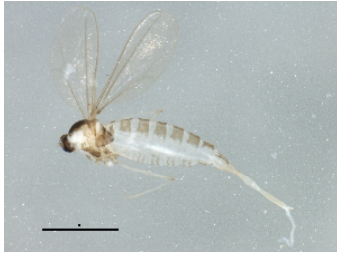

BIOUG01478-F08 [Lateral]  
Cecidomyiidae  
Family: Cecidomyiidae  
BIN URI: BOLD:AAV6418

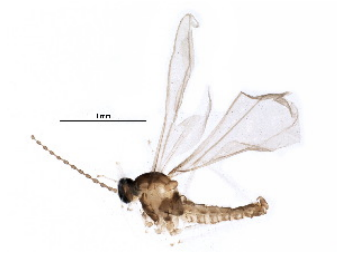

BIOUG22419-G12 [Lateral]  
Dasineura  
Family: Cecidomyiidae  
BIN URI: BOLD:ACV3706

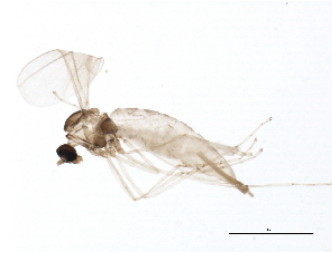

10PHMAL-1466 [Lateral]  
Cecidomyiidae  
Family: Cecidomyiidae  
BIN URI: BOLD:AAU6618

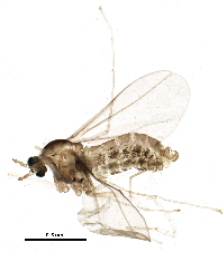

BIOUG21893-G06 [Lateral]  
Cecidomyiidae  
Family: Cecidomyiidae  
BIN URI: BOLD:ACV5220

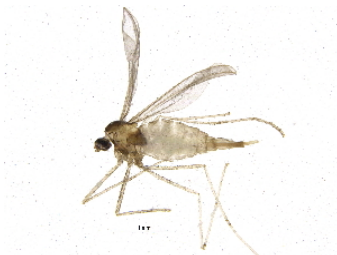

BIOUG08599-C07 [Lateral]  
Cecidomyiidae  
Family: Cecidomyiidae  
BIN URI: BOLD:ACJ6637

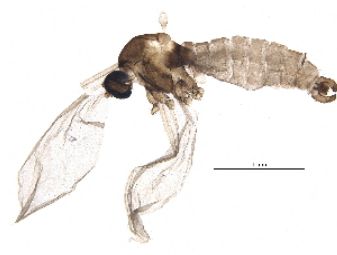

BIOUG16057-D07 [Lateral]  
Cecidomyiidae  
Family: Cecidomyiidae  
BIN URI: BOLD:ACP9024

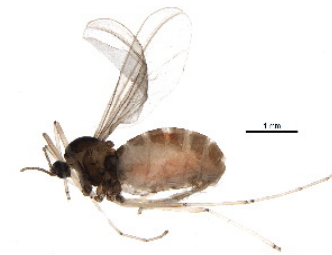

BIOUG24024-G07 [Lateral]  
Cecidomyiidae  
Family: Cecidomyiidae

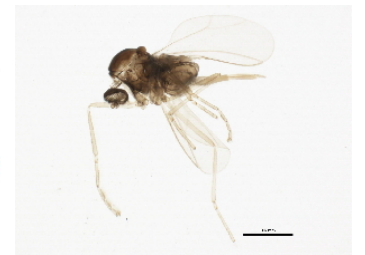

10PHMAL-3432 [Lateral]  
Cecidomyiidae  
Family: Cecidomyiidae  
BIN URI: BOLD:AAV5178

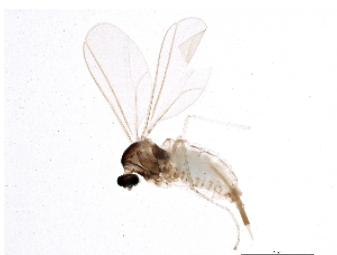

BIOUG02638-H07 [Lateral]  
Cecidomyiidae  
Family: Cecidomyiidae  
BIN URI: BOLD:ABV0473

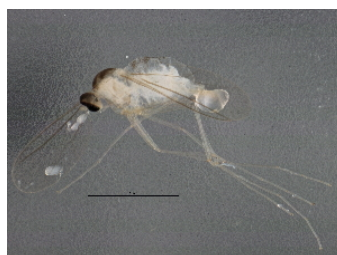

BIOUG03562-B12 [Lateral]  
Cecidomyiidae  
Family: Cecidomyiidae  
BIN URI: BOLD:ACA9569

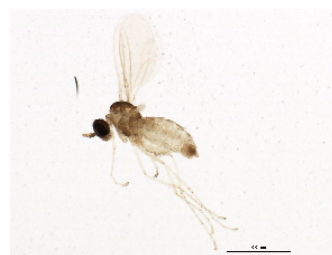

BIOUG01125-D03 [Lateral]  
Cecidomyiidae  
Family: Cecidomyiidae  
BIN URI: BOLD:AAQ2523

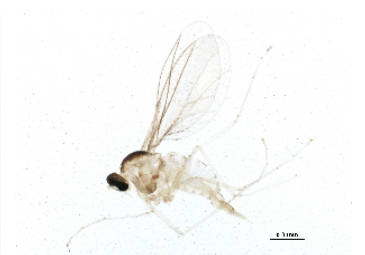

BIOUG06297-B06 [Lateral]  
Cecidomyiidae  
Family: Cecidomyiidae  
BIN URI: BOLD:AAU6610

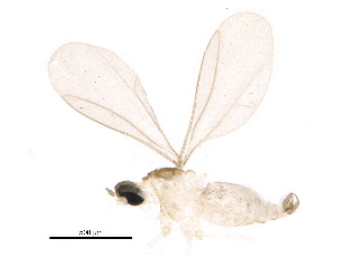

BIOUG22576-C05 [Lateral]

IMAGE NOT AVAILABLE

BIOUG23086-E11  
Cecidomyiidae  
Family: Cecidomyiidae

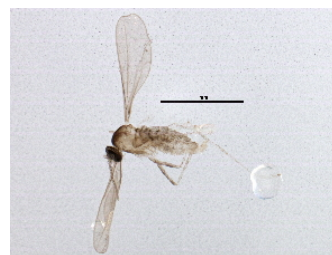

BIOUG03518-H10 [Lateral]

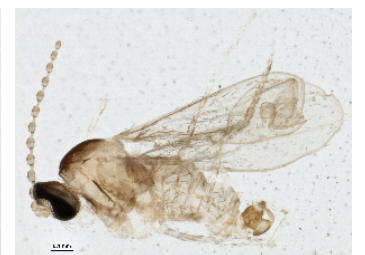

BIOUG03679-E12 [Lateral]

Cecidomyiidae  
Family: Cecidomyiidae  
BIN URI: BOLD:ACA4717

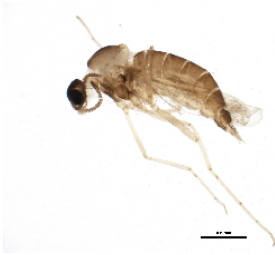

**BIOUG01444-A08 [Lateral]**  
Cecidomyiidae  
Family: Cecidomyiidae  
BIN URI: BOLD:ACF4376

Cecidomyiidae  
Family: Cecidomyiidae  
BIN URI: BOLD:ACC8185

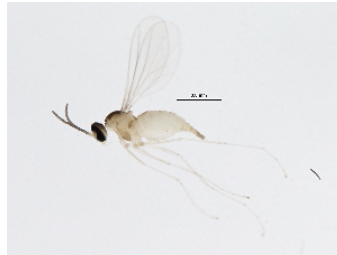

**10JSROW-1425 [Lateral]**  
Cecidomyiidae  
Family: Cecidomyiidae  
BIN URI: BOLD:AAV5323

Cecidomyiidae  
Family: Cecidomyiidae  
BIN URI: BOLD:ACC8560

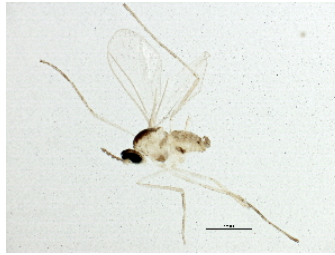

**BIOUG03069-D11 [Lateral]**  
Cecidomyiidae  
Family: Cecidomyiidae  
BIN URI: BOLD:AAV5790

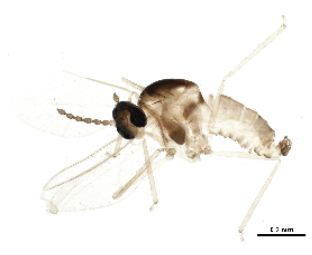

**BIOUG21893-B02 [Lateral]**  
Cecidomyiidae  
Family: Cecidomyiidae  
BIN URI: BOLD:ACK5585

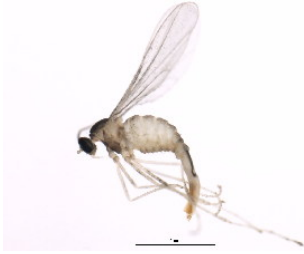

**BIOUG00860-D07 [Lateral]**  
Cecidomyiidae  
Family: Cecidomyiidae  
BIN URI: BOLD:AAQ0262

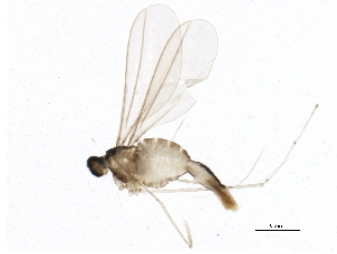

**10PHMAL-2762 [Lateral]**  
Cecidomyiidae  
Family: Cecidomyiidae  
BIN URI: BOLD:ACE6955

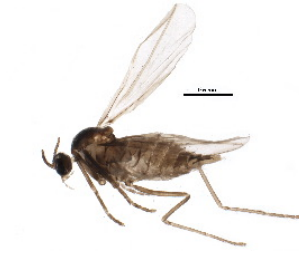

**BIOUG21770-A05 [Lateral]**  
Cecidomyiidae  
Family: Cecidomyiidae  
BIN URI: BOLD:ACV2925

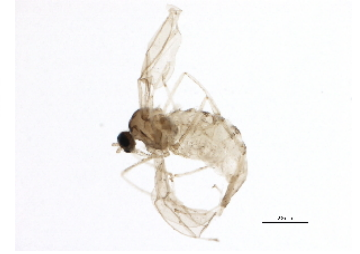

**BIOUG01119-E02 [Lateral]**  
Cecidomyiidae  
Family: Cecidomyiidae  
BIN URI: BOLD:AAY6452

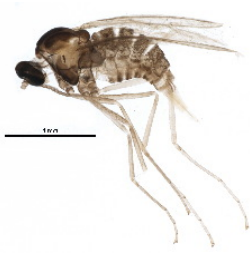

**BIOUG22292-E10 [Lateral]**  
Cecidomyiidae  
Family: Cecidomyiidae  
BIN URI: BOLD:ACV2288

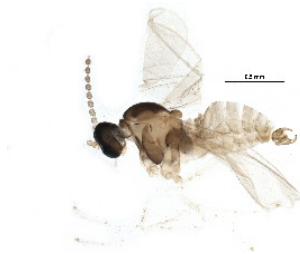

**BIOUG22291-D11 [Lateral]**  
Cecidomyiidae  
Family: Cecidomyiidae  
BIN URI: BOLD:ACV3141

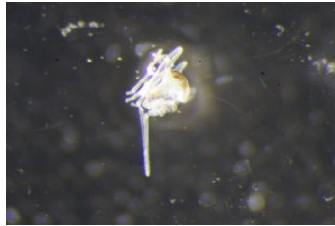

**BIOUG08135-G12 [Lateral]**  
Cecidomyiidae  
Family: Cecidomyiidae  
BIN URI: BOLD:AAY6448

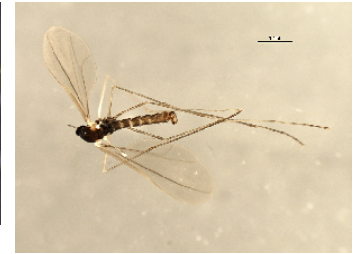

**10JSROW-0813 [Dorsal]**  
Cecidomyiidae  
Family: Cecidomyiidae  
BIN URI: BOLD:AAP9022

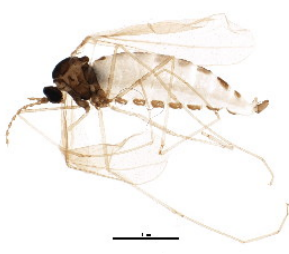

**BIOUG01684-A04 [Lateral]**  
Mayetiola  
Family: Cecidomyiidae  
BIN URI: BOLD:ABV9277

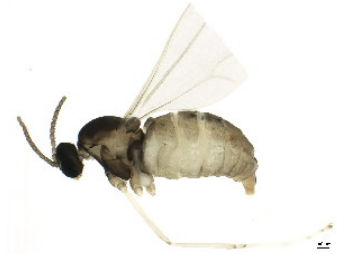

**BIOUG01348-B08 [Lateral]**  
Cecidomyiidae  
Family: Cecidomyiidae  
BIN URI: BOLD:AAQ0642

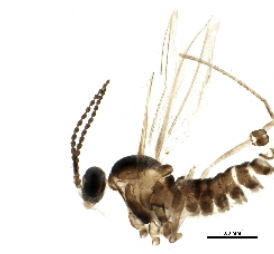

**BIOUG22365-C04 [Lateral]**  
Cecidomyiidae  
Family: Cecidomyiidae  
BIN URI: BOLD:ACV4450

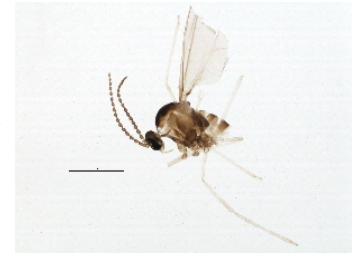

**BIOUG02601-H05 [Lateral]**  
Cecidomyiidae  
Family: Cecidomyiidae  
BIN URI: BOLD:ABX7522

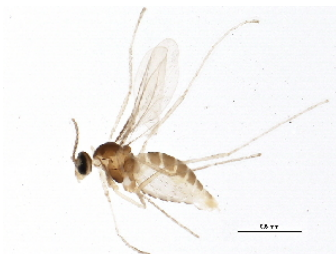

**08TTML-2494 [Lateral]**  
Cecidomyiidae  
Family: Cecidomyiidae  
BIN URI: BOLD:AAN5200

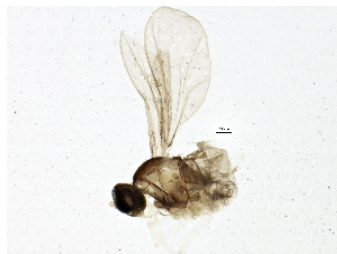

**BIOUG03066-C06 [Lateral]**  
Cecidomyiidae  
Family: Cecidomyiidae  
BIN URI: BOLD:ACC7924

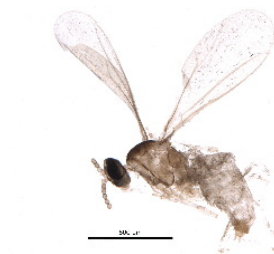

**BIOUG22454-E03 [Lateral]**  
Cecidomyiidae  
Family: Cecidomyiidae  
BIN URI: BOLD:ACV4210

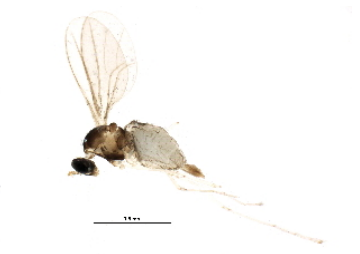

**BIOUG23073-B10 [Lateral]**  
Cecidomyiidae  
Family: Cecidomyiidae  
BIN URI: BOLD:ACV5688

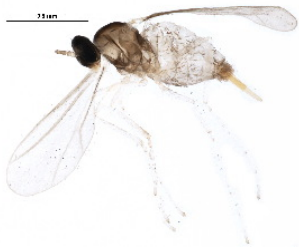

**BIOUG23078-C07 [Lateral]**  
Cecidomyiidae  
Family: Cecidomyiidae  
BIN URI: BOLD:ACV5834

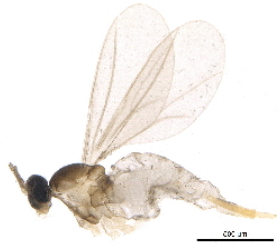

**BIOUG23308-H10 [Lateral]**  
Cecidomyiidae  
Family: Cecidomyiidae  
BIN URI: BOLD:ACW1203

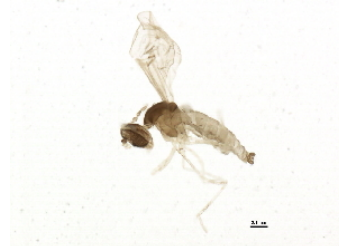

**BIOUG01132-C04 [Lateral]**  
Cecidomyiidae  
Family: Cecidomyiidae  
BIN URI: BOLD:AAV6376

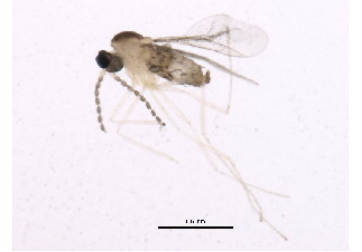

**BIOUG00860-F09 [Lateral]**  
Cecidomyiidae  
Family: Cecidomyiidae  
BIN URI: BOLD:ABA0830

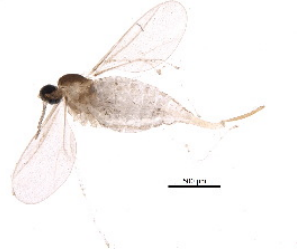

**BIOUG23075-G09 [Lateral]**  
Cecidomyiidae  
Family: Cecidomyiidae  
BIN URI: BOLD:ACV5280

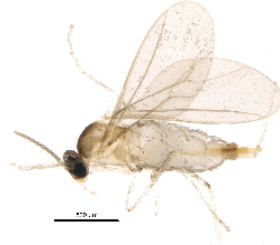

**BIOUG23076-A01 [Lateral]**  
Cecidomyiidae  
Family: Cecidomyiidae  
BIN URI: BOLD:ACJ0207

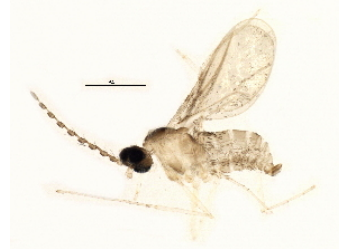

**BIOUG08625-C04 [Lateral]**  
Cecidomyiidae  
Family: Cecidomyiidae  
BIN URI: BOLD:ACK2812

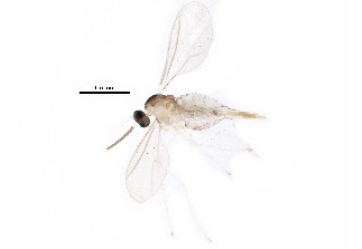

**BIOUG22721-G01 [Lateral]**  
Cecidomyiidae  
Family: Cecidomyiidae  
BIN URI: BOLD:ACV5343

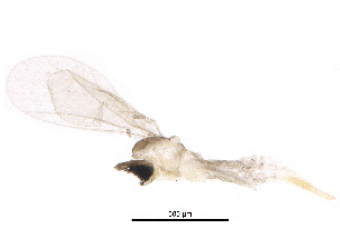

**BIOUG23080-F05 [Lateral]**  
Cecidomyiidae  
Family: Cecidomyiidae  
BIN URI: BOLD:ACV5733

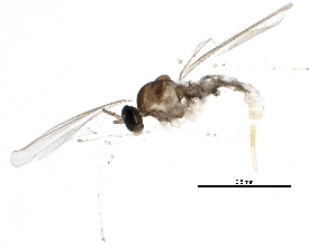

**BIOUG22084-E11 [Lateral]**  
Cecidomyiidae  
Family: Cecidomyiidae  
BIN URI: BOLD:ABW7767

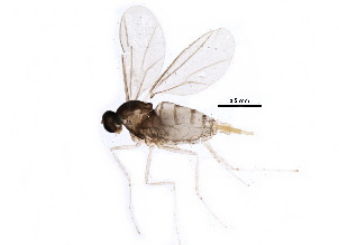

**BIOUG22418-C01 [Lateral]**  
Cecidomyiidae  
Family: Cecidomyiidae  
BIN URI: BOLD:ACV4035

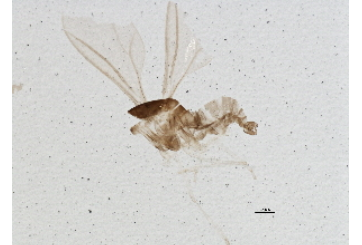

**BIOUG02628-D04 [Lateral]**  
Cecidomyiidae  
Family: Cecidomyiidae  
BIN URI: BOLD:ABX7810

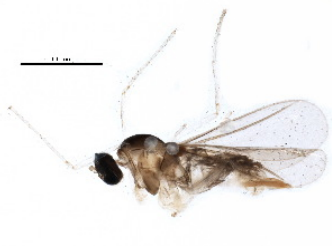

**BIOUG23078-C12 [Lateral]**  
Cecidomyiidae  
Family: Cecidomyiidae  
BIN URI: BOLD:ACV4868

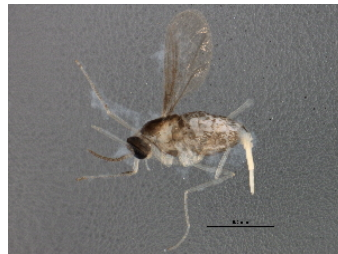

**BIOUG03750-D05 [Lateral]**  
Cecidomyiidae  
Family: Cecidomyiidae  
BIN URI: BOLD:AAM6038

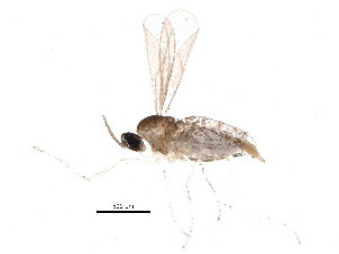

**BIOUG23084-G06 [Lateral]**  
Cecidomyiidae  
Family: Cecidomyiidae  
BIN URI: BOLD:ACW0773

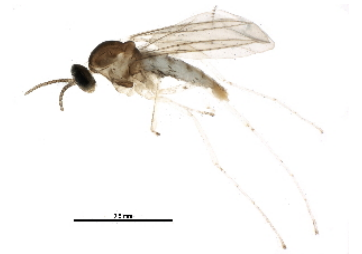

**BIOUG23072-E08 [Lateral]**  
Cecidomyiidae  
Family: Cecidomyiidae  
BIN URI: BOLD:ACV5840

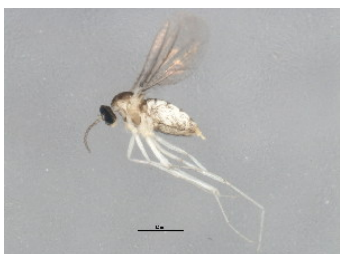

**BIOUG00819-D09 [Lateral]**  
Cecidomyiidae  
Family: Cecidomyiidae  
BIN URI: BOLD:AAH3701

**IMAGE NOT AVAILABLE**

**BIOUG22722-D02**  
Cecidomyiidae  
Family: Cecidomyiidae

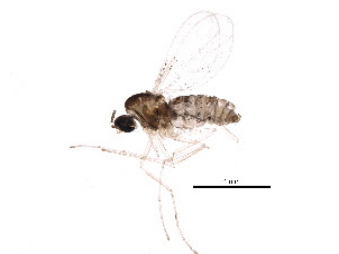

**BIOUG22351-C04 [Lateral]**  
Cecidomyiidae  
Family: Cecidomyiidae  
BIN URI: BOLD:AAH5195

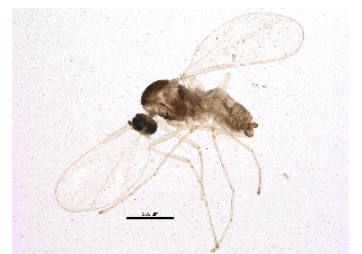

**BIOUG10359-E01 [Lateral]**  
Cecidomyiidae  
Family: Cecidomyiidae  
BIN URI: BOLD:ACL4289

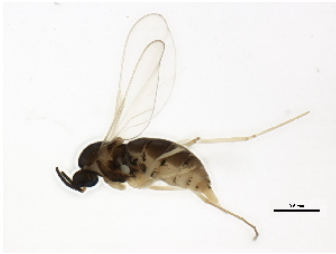

**BIOUG01410-E03 [Lateral]**  
Cecidomyiidae  
Family: Cecidomyiidae  
BIN URI: BOLD:AAN5221

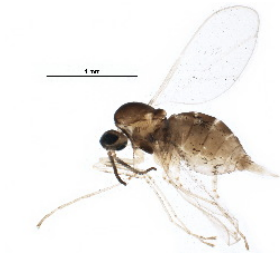

**BIOUG22463-D04 [Lateral]**  
Cecidomyiidae  
Family: Cecidomyiidae  
BIN URI: BOLD:ACM2973

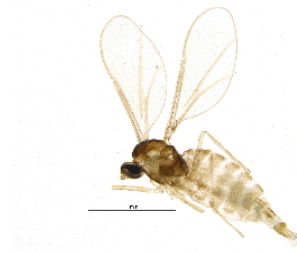

**BIOUG02894-H09 [Lateral]**  
*Asteromyia modesta*  
Family: Cecidomyiidae  
BIN URI: BOLD:ACG8775

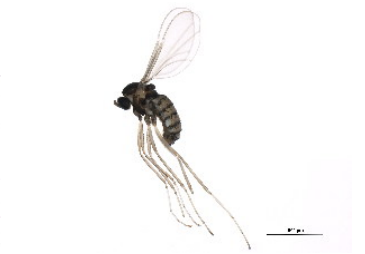

**BIOUG01348-G03 [Lateral]**  
Cecidomyiidae  
Family: Cecidomyiidae  
BIN URI: BOLD:AAA2254

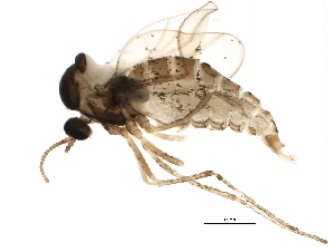

**BIOUG01125-E06 [Lateral]**  
*Asteromyia carbonifera*  
Family: Cecidomyiidae  
BIN URI: BOLD:ABX5689

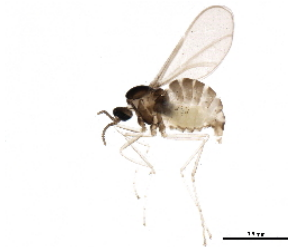

**BIOUG22366-G11 [Lateral]**  
*Asteromyia modesta*  
Family: Cecidomyiidae  
BIN URI: BOLD:AAM1948

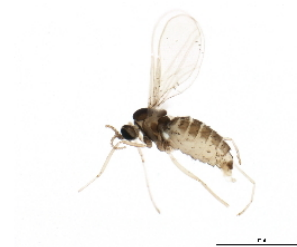

**BIOUG01123-F03 [Lateral]**  
*Asteromyia modesta*  
Family: Cecidomyiidae  
BIN URI: BOLD:AAM1954

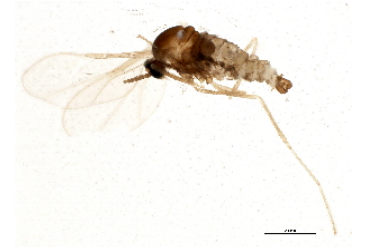

**BIOUG01589-G11 [Lateral]**  
*Asteromyia laeviana*  
Family: Cecidomyiidae  
BIN URI: BOLD:ABV1420

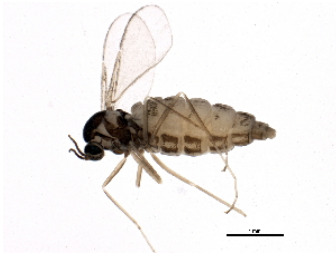

**BIOUG02383-D02 [Lateral]**  
*Asteromyia tumifica*  
Family: Cecidomyiidae  
BIN URI: BOLD:ACL0470

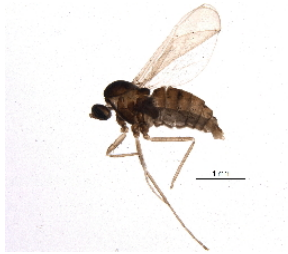

**BIOUG10608-E07 [Lateral]**  
*Asteromyia*  
Family: Cecidomyiidae  
BIN URI: BOLD:ACL8441

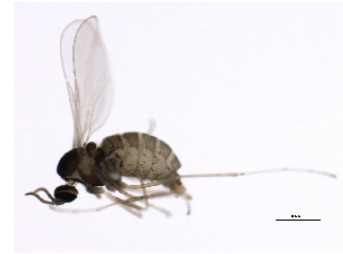

**10JSROW-0358 [Lateral]**  
*Asteromyia modesta*  
Family: Cecidomyiidae  
BIN URI: BOLD:AAM1947

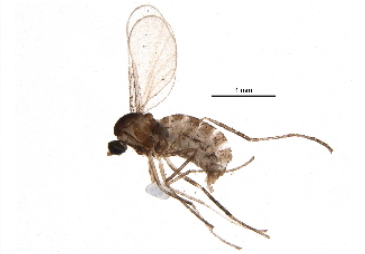

**BIOUG09355-G04 [Lateral]**  
*Asteromyia*  
Family: Cecidomyiidae  
BIN URI: BOLD:ACN2213

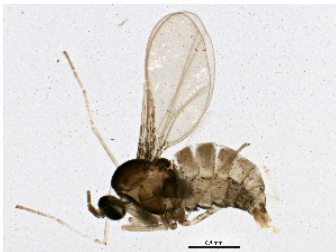

**BIOUG02875-B07 [Lateral]**  
*Asteromyia*  
Family: Cecidomyiidae  
BIN URI: BOLD:ACB3163

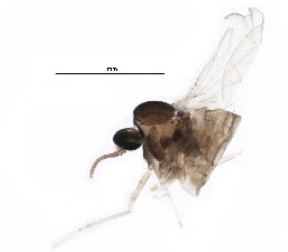

**BIOUG22415-G04 [Lateral]**  
*Asteromyia*  
Family: Cecidomyiidae  
BIN URI: BOLD:ACV3990

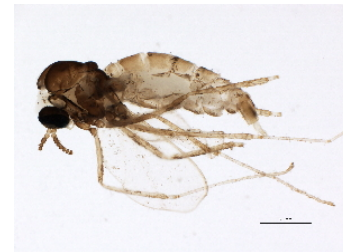

**BIOUG01609-F10 [Lateral]**  
Cecidomyiidae  
Family: Cecidomyiidae  
BIN URI: BOLD:AAV5562

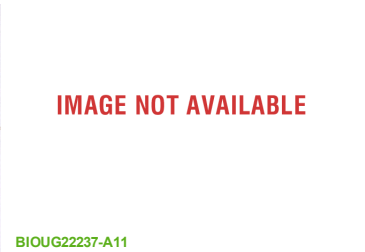

**BIOUG22237-A11**  
Chironomidae  
Family: Chironomidae

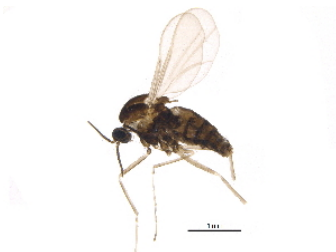

**BIOUG22323-B05 [Lateral]**  
Cecidomyiidae  
Family: Cecidomyiidae  
BIN URI: BOLD:ACV3571

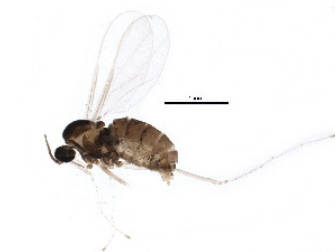

**BIOUG22416-F09 [Lateral]**  
Cecidomyiidae  
Family: Cecidomyiidae  
BIN URI: BOLD:ACV4280

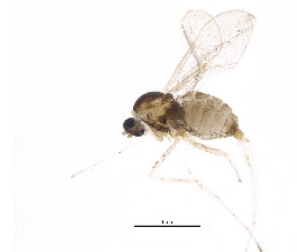

**BIOUG20955-G11 [Lateral]**  
Diptera  
BIN URI: BOLD:ACU6359

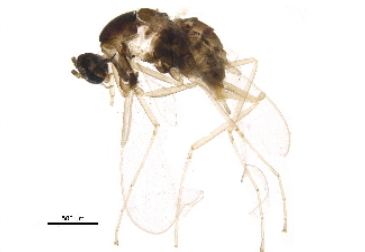

**BIOUG22468-D09 [Lateral]**  
*Asteromyia*  
Family: Cecidomyiidae  
BIN URI: BOLD:ACV5159

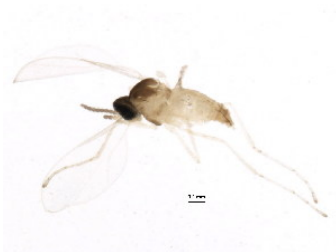

**BIOUG01345-H06 [Lateral]**  
Cecidomyiidae  
Family: Cecidomyiidae  
BIN URI: BOLD:AAN5233

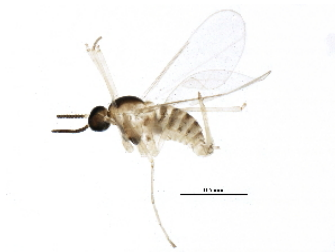

**BIOUG22084-H05 [Lateral]**  
Cecidomyiidae  
Family: Cecidomyiidae  
BIN URI: BOLD:ACV4277

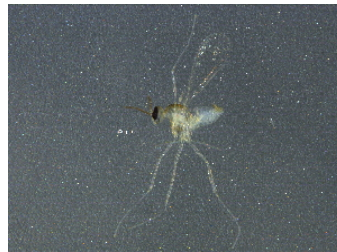

**BIOUG02623-H10 [Lateral]**  
Cecidomyiidae  
Family: Cecidomyiidae  
BIN URI: BOLD:ABA0859

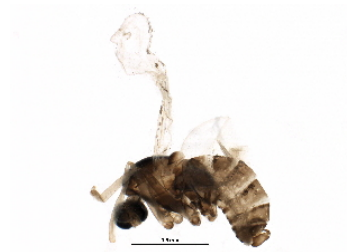

**BIOUG22459-H01 [Lateral]**  
Cecidomyiidae  
Family: Cecidomyiidae  
BIN URI: BOLD:ACV4447

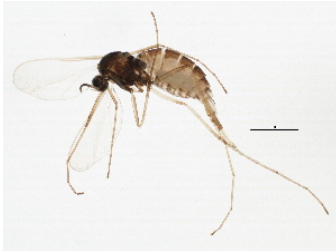

**BIOUG02601-G11 [Lateral]**  
Cecidomyiidae  
Family: Cecidomyiidae  
BIN URI: BOLD:ABW7797

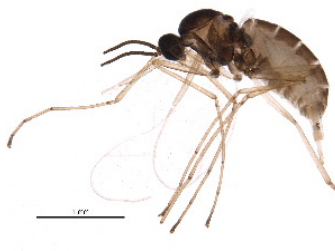

**BIOUG22454-E01 [Lateral]**  
Cecidomyiidae  
Family: Cecidomyiidae  
BIN URI: BOLD:ACV4374

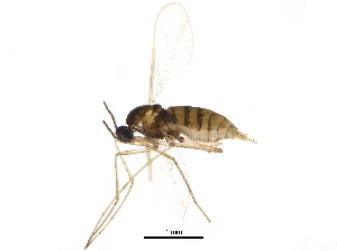

**BIOUG22468-C05 [Lateral]**  
Cecidomyiidae  
Family: Cecidomyiidae  
BIN URI: BOLD:ACV6040

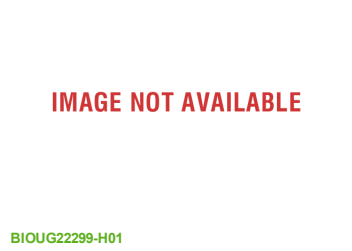

**IMAGE NOT AVAILABLE**

**BIOUG22299-H01**  
Cecidomyiidae  
Family: Cecidomyiidae

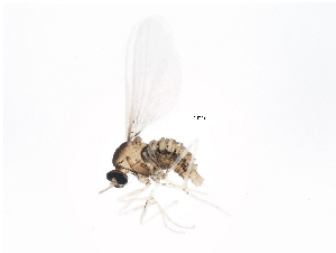

**10JSROW-1593 [Lateral]**  
Cecidomyiidae  
Family: Cecidomyiidae  
BIN URI: BOLD:AAV5792

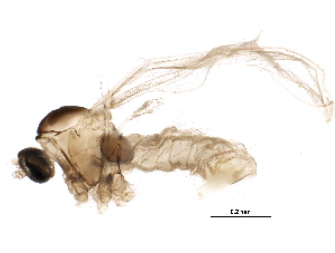

**BIOUG10829-E05 [Lateral]**  
Cecidomyiidae  
Family: Cecidomyiidae  
BIN URI: BOLD:AAU6609

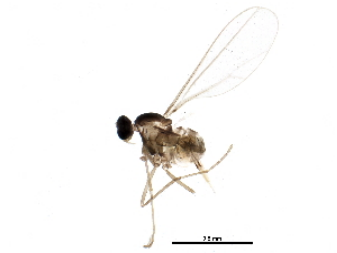

**BIOUG22084-F02 [Lateral]**  
Cecidomyiidae  
Family: Cecidomyiidae  
BIN URI: BOLD:AAV5329

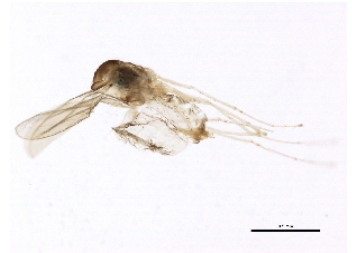

**BIOUG01119-H08 [Lateral]**  
Cecidomyiidae  
Family: Cecidomyiidae  
BIN URI: BOLD:AAV6457

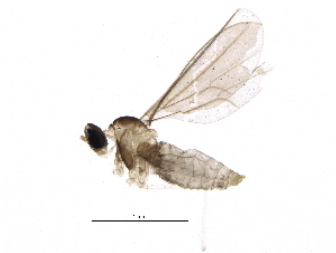

**BIOUG06867-G12 [Lateral]**  
Cecidomyiinae  
Family: Cecidomyiidae  
BIN URI: BOLD:ACI5257

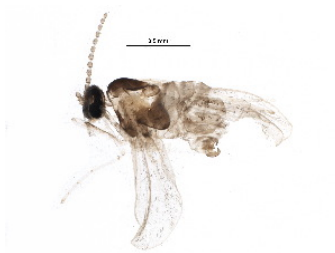

**BIOUG22731-B08 [Lateral]**  
Cecidomyiidae  
Family: Cecidomyiidae  
BIN URI: BOLD:ACV5556

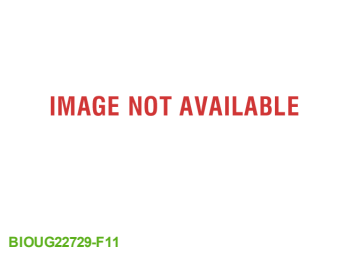

**IMAGE NOT AVAILABLE**

**BIOUG22729-F11**  
Cecidomyiidae  
Family: Cecidomyiidae

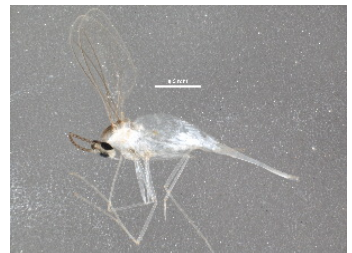

**BIOUG22722-C07 [Lateral]**  
Cecidomyiidae  
Family: Cecidomyiidae  
BIN URI: BOLD:ACV5705

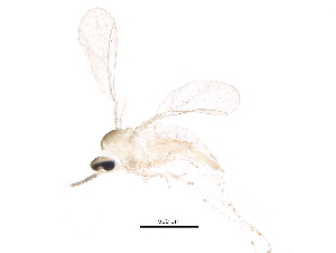

**BIOUG23082-A11 [Lateral]**  
Cecidomyiidae  
Family: Cecidomyiidae  
BIN URI: BOLD:ACW1240

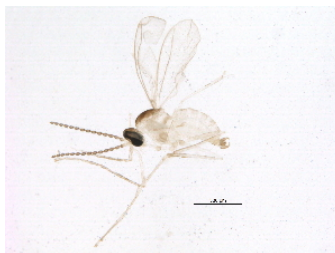

**BIOUG03752-F12 [Lateral]**  
Cecidomyiidae  
Family: Cecidomyiidae  
BIN URI: BOLD:ACC8788

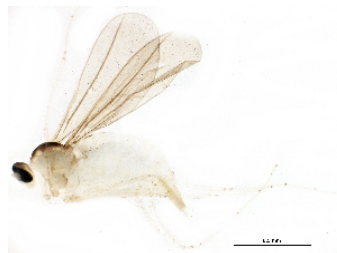

**BIOUG22459-H03 [Lateral]**  
Dasineura  
Family: Cecidomyiidae  
BIN URI: BOLD:ABV0493

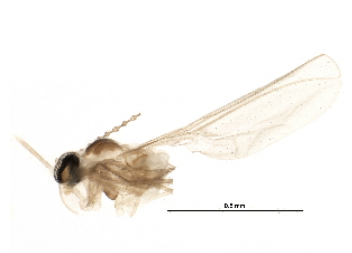

**BIOUG22459-H02 [Lateral]**  
Cecidomyiidae  
Family: Cecidomyiidae  
BIN URI: BOLD:ACV3783

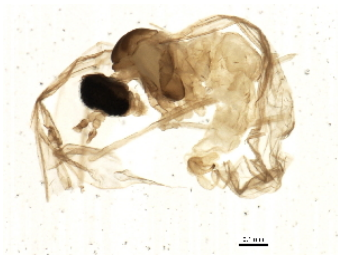

**BIOUG01142-C08 [Lateral]**  
Cecidomyiidae  
Family: Cecidomyiidae  
BIN URI: BOLD:AAZ5620

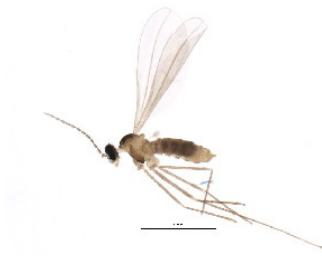

**BIOUG00942-A06 [Lateral]**  
Cecidomyiidae  
Family: Cecidomyiidae  
BIN URI: BOLD:AAG3625

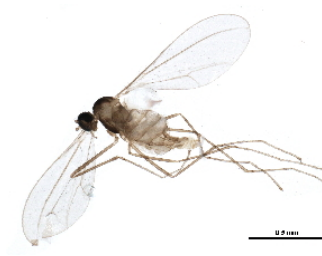

**BIOUG23075-B10 [Lateral]**  
Cecidomyiidae  
Family: Cecidomyiidae  
BIN URI: BOLD:AAV5689

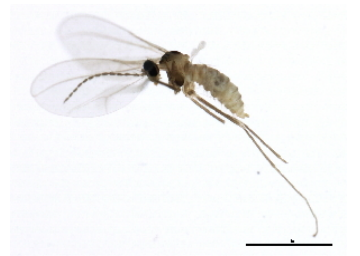

**PCPP10-0820 [Lateral]**  
Cecidomyiidae  
Family: Cecidomyiidae  
BIN URI: BOLD:AAV5594

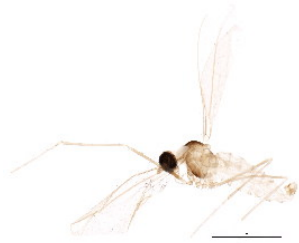

**BIOUG01450-C10 [Lateral]**  
Cecidomyiidae  
Family: Cecidomyiidae  
BIN URI: BOLD:ABV9290

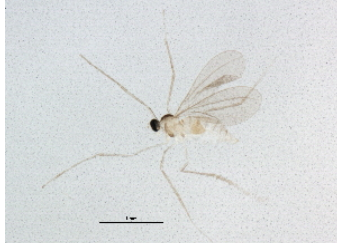

**BIOUG03444-B01 [Lateral]**  
Cecidomyiidae  
Family: Cecidomyiidae  
BIN URI: BOLD:ACA6970

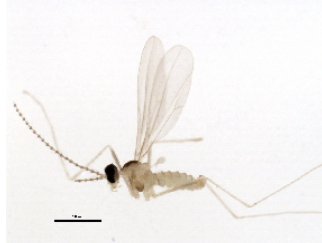

**09BBDIP-0631 [Lateral]**  
Cecidomyiidae  
Family: Cecidomyiidae  
BIN URI: BOLD:AAH3655

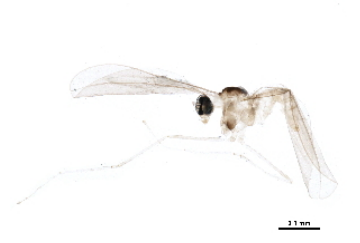

**BIOUG23318-C11 [Lateral]**  
Cecidomyiidae  
Family: Cecidomyiidae  
BIN URI: BOLD:ACW1049

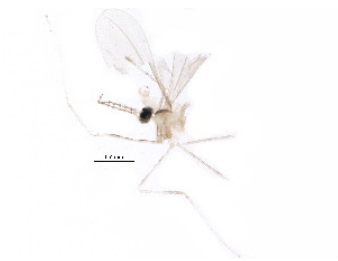

**BIOUG21208-H01 [Lateral]**  
Diptera  
BIN URI: BOLD:ABV1384

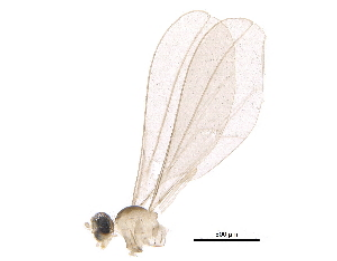

**BIOUG23308-F03 [Lateral]**  
Cecidomyiidae  
Family: Cecidomyiidae  
BIN URI: BOLD:ACW1246

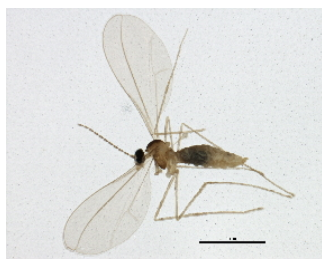

**BIOUG01982-D03 [Lateral]**  
Cecidomyiidae  
Family: Cecidomyiidae  
BIN URI: BOLD:AAH3617

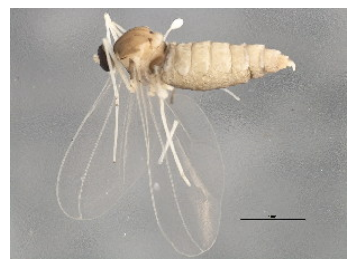

**10JSROW-0681 [Lateral]**  
Cecidomyiidae  
Family: Cecidomyiidae  
BIN URI: BOLD:AAV5352

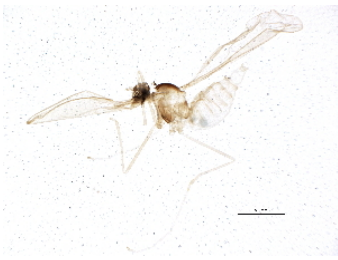

**BIOUG01609-B09 [Lateral]**  
Cecidomyiidae  
Family: Cecidomyiidae  
BIN URI: BOLD:AAH3662

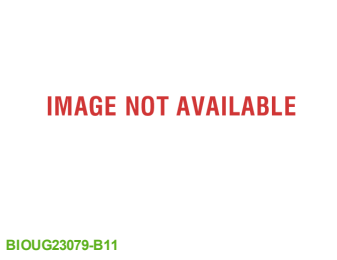

**BIOUG23079-B11**  
Cecidomyiidae  
Family: Cecidomyiidae

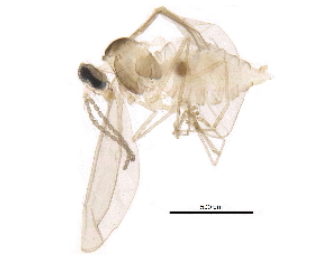

**BIOUG22719-A07 [Lateral]**  
Cecidomyiidae  
Family: Cecidomyiidae  
BIN URI: BOLD:ACV4546

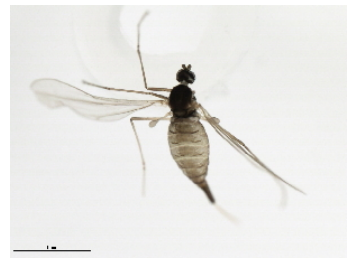

**10JSROW-1395 [Dorsal]**  
Cecidomyiidae  
Family: Cecidomyiidae  
BIN URI: BOLD:AAV5319

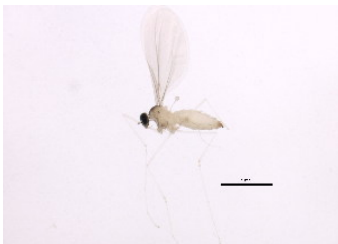

**BIOUG00860-H06 [Lateral]**  
Cecidomyiidae  
Family: Cecidomyiidae  
BIN URI: BOLD:AAM7667

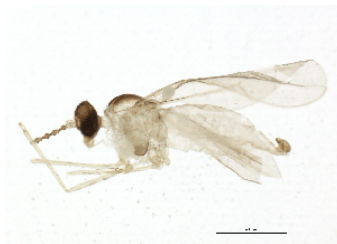

**BIOUG01116-E06 [Lateral]**  
Cecidomyiidae  
Family: Cecidomyiidae  
BIN URI: BOLD:AAN5261

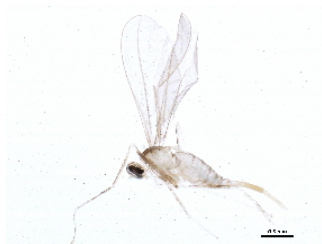

**BIOUG10279-E04 [Lateral]**  
Cecidomyiidae  
Family: Cecidomyiidae  
BIN URI: BOLD:ABX8646

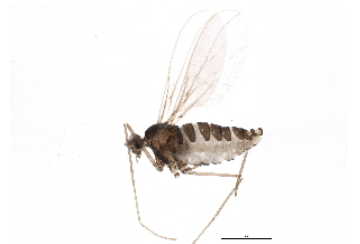

**BIOUG13080-B03 [Lateral]**  
Cecidomyiidae  
Family: Cecidomyiidae  
BIN URI: BOLD:ACL0188

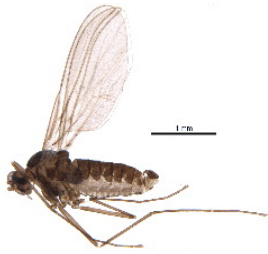

IMAGE NOT AVAILABLE

**BIOUG22356-B10 [Lateral]**  
Cecidomyiidae  
Family: Cecidomyiidae  
BIN URI: BOLD:ACV4008

**BIOUG22634-H07**  
Cecidomyiidae  
Family: Cecidomyiidae

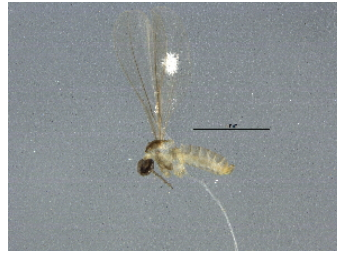

**BIOUG04015-G10 [Lateral]**  
Cecidomyiidae  
Family: Cecidomyiidae  
BIN URI: BOLD:ABV0502

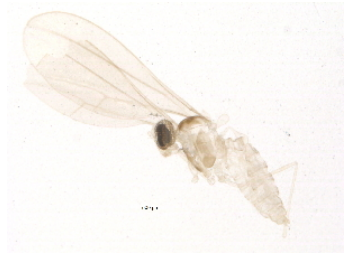

**BIOUG04965-B08 [Lateral]**  
Cecidomyiidae  
Family: Cecidomyiidae  
BIN URI: BOLD:ACF6207

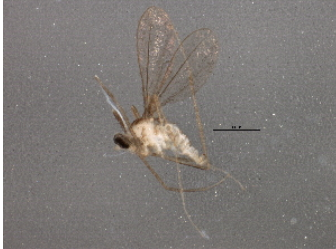

**BIOUG03562-E01 [Lateral]**  
Cecidomyiidae  
Family: Cecidomyiidae  
BIN URI: BOLD:ACA9953

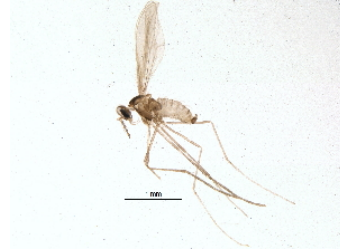

**BIOUG10504-A09 [Lateral]**  
Cecidomyiidae  
Family: Cecidomyiidae  
BIN URI: BOLD:ACM2272

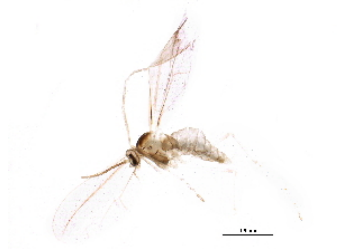

**BIOUG10604-H01 [Lateral]**  
Cecidomyiidae  
Family: Cecidomyiidae  
BIN URI: BOLD:ACV4516

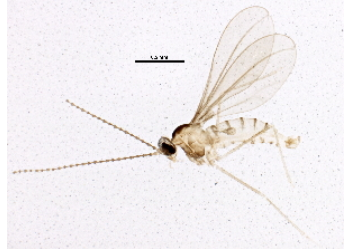

**BIOUG03763-D03 [Lateral]**  
Cecidomyiidae  
Family: Cecidomyiidae  
BIN URI: BOLD:ACB2053

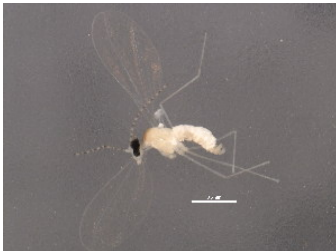

**BIOUG01460-A09 [Lateral]**  
Cecidomyiidae  
Family: Cecidomyiidae  
BIN URI: BOLD:ACC5547

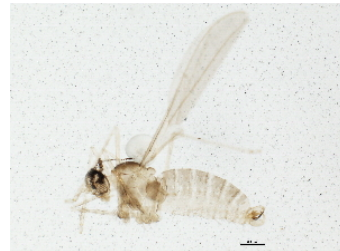

**BIOUG03636-E04 [Lateral]**  
Cecidomyiidae  
Family: Cecidomyiidae  
BIN URI: BOLD:ACC7889

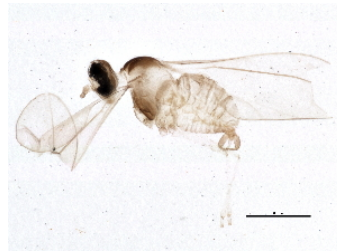

**BIOUG02928-D11 [Lateral]**  
Cecidomyiidae  
Family: Cecidomyiidae  
BIN URI: BOLD:AAV6396

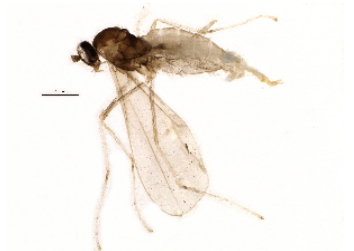

**BIOUG10707-A01 [Lateral]**  
Cecidomyiidae  
Family: Cecidomyiidae  
BIN URI: BOLD:ACL8670

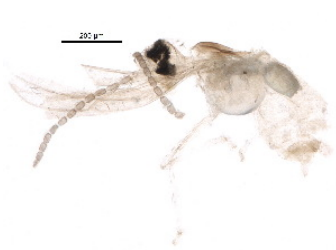

**BIOUG21140-D04 [Lateral]**  
Diptera  
BIN URI: BOLD:ACW0868

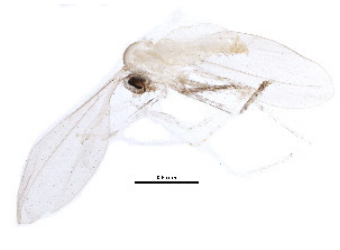

**BIOUG22722-D06 [Lateral]**  
Cecidomyiidae  
Family: Cecidomyiidae  
BIN URI: BOLD:ABV1369

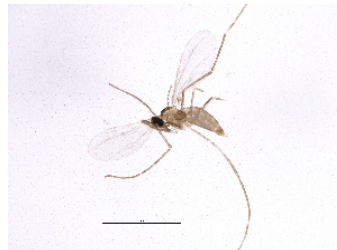

**BIOUG04085-B07 [Lateral]**  
Cecidomyiidae  
Family: Cecidomyiidae  
BIN URI: BOLD:AAN5225

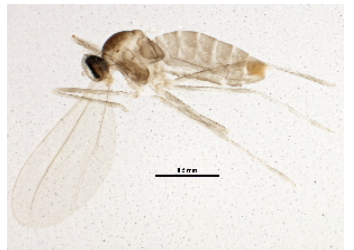

**BIOUG03750-B11 [Lateral]**  
Cecidomyiidae  
Family: Cecidomyiidae  
BIN URI: BOLD:ACA6930

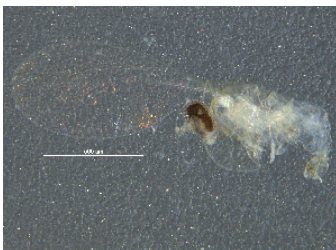

**BIOUG02851-F05 [Lateral]**  
Cecidomyiidae  
Family: Cecidomyiidae  
BIN URI: BOLD:ACF3692

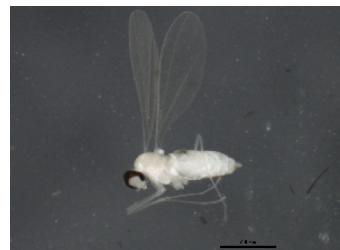

**BIOUG00915-G03 [Lateral]**  
Cecidomyiidae  
Family: Cecidomyiidae  
BIN URI: BOLD:AAH3691

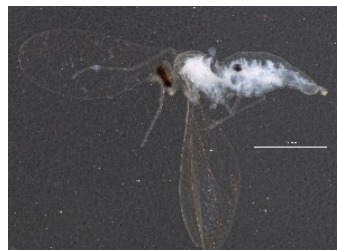

**BIOUG01507-C08 [Lateral]**  
Cecidomyiidae  
Family: Cecidomyiidae  
BIN URI: BOLD:ACF3694

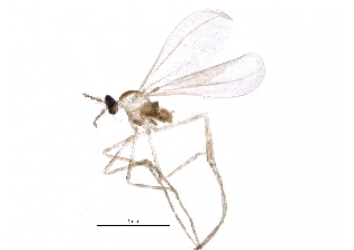

**BIOUG08629-B05 [Lateral]**  
Cecidomyiidae  
Family: Cecidomyiidae  
BIN URI: BOLD:ACK2185

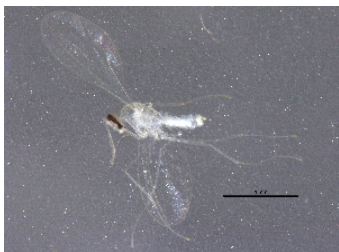

**BIOUG08607-F10 [Lateral]**  
Cecidomyiidae  
Family: Cecidomyiidae  
BIN URI: BOLD:ACK3192

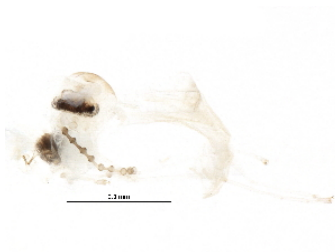

**BIOUG22732-D04 [Lateral]**  
Cecidomyiidae  
Family: Cecidomyiidae  
BIN URI: BOLD:ACV4879

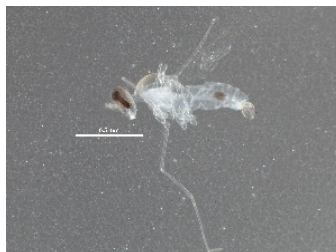

**BIOUG22467-H07 [Lateral]**  
Cecidomyiidae  
Family: Cecidomyiidae  
BIN URI: BOLD:ACV4196

**IMAGE NOT AVAILABLE**

**BIOUG22725-B11**  
Cecidomyiidae  
Family: Cecidomyiidae  
BIN URI: BOLD:ACV5488

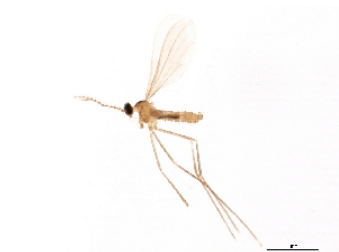

**08TTML-2185 [Lateral]**  
Cecidomyiidae  
Family: Cecidomyiidae  
BIN URI: BOLD:AAN5271

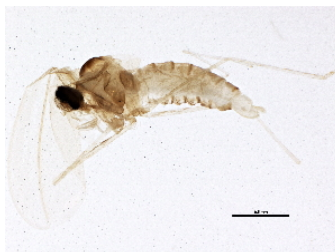

**BIOUG01609-C06 [Lateral]**  
Cecidomyiidae  
Family: Cecidomyiidae  
BIN URI: BOLD:AAY6381

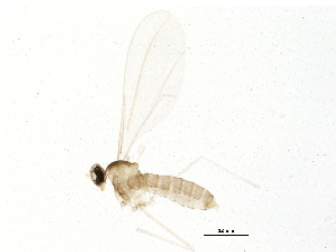

**BIOUG01509-A06 [Lateral]**  
Cecidomyiidae  
Family: Cecidomyiidae  
BIN URI: BOLD:ABW8023

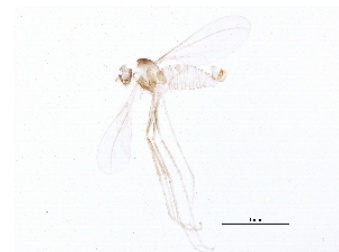

**BIOUG01609-B07 [Lateral]**  
Cecidomyiidae  
Family: Cecidomyiidae  
BIN URI: BOLD:AAM6040

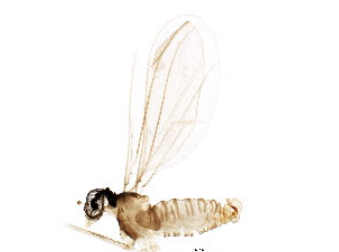

**BIOUG01513-G09 [Lateral]**  
Cecidomyiidae  
Family: Cecidomyiidae  
BIN URI: BOLD:AAN5220

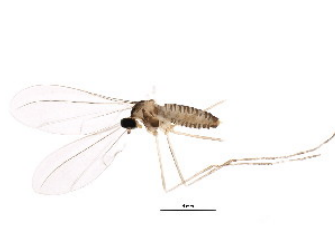

**BIOUG01352-H07 [Lateral]**  
Cecidomyiidae  
Family: Cecidomyiidae  
BIN URI: BOLD:ABW7834

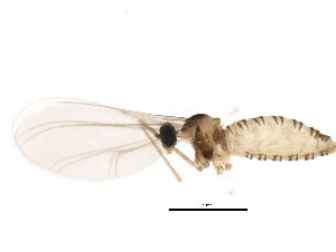

**BIOUG01337-D01 [Lateral]**  
Cecidomyiidae  
Family: Cecidomyiidae  
BIN URI: BOLD:ABA7871

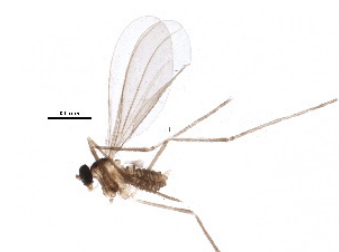

**BIOUG23076-C05 [Lateral]**  
Cecidomyiidae  
Family: Cecidomyiidae  
BIN URI: BOLD:ACV5891

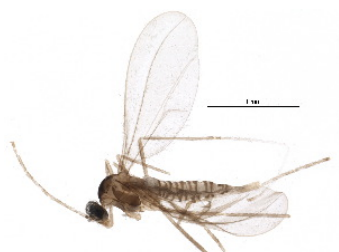

**BIOUG22731-D08 [Lateral]**  
Cecidomyiidae  
Family: Cecidomyiidae  
BIN URI: BOLD:ACV5892

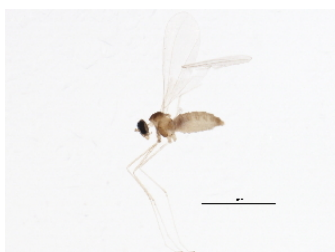

**08TTML-1220 [Lateral]**  
Cecidomyiidae  
Family: Cecidomyiidae  
BIN URI: BOLD:AAN5198

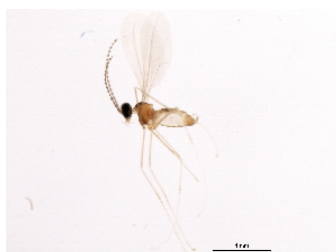

**08TTML-2270 [Lateral]**  
Cecidomyiidae  
Family: Cecidomyiidae  
BIN URI: BOLD:AAN5276

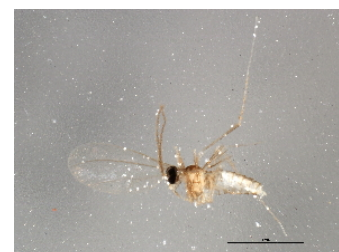

**BIOUG02583-H11 [Lateral]**  
Cecidomyiidae  
Family: Cecidomyiidae  
BIN URI: BOLD:AAN5244

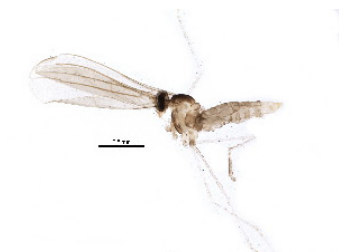

**BIOUG21064-D08 [Lateral]**  
Diptera

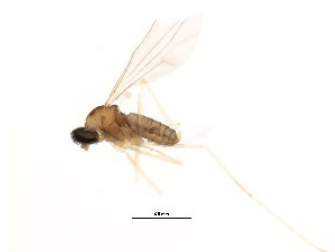

**BIOUG01460-D11 [Lateral]**  
Cecidomyiidae  
Family: Cecidomyiidae  
BIN URI: BOLD:ABV9080

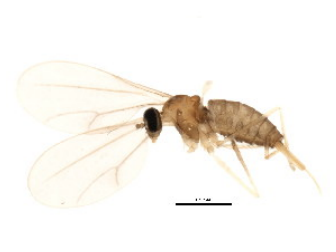

**BIOUG01460-C09 [Lateral]**  
Cecidomyiidae  
Family: Cecidomyiidae  
BIN URI: BOLD:ABV0477

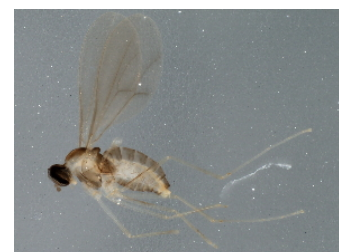

**BIOUG02859-F10 [Lateral]**  
Cecidomyiidae  
Family: Cecidomyiidae  
BIN URI: BOLD:ACB3295



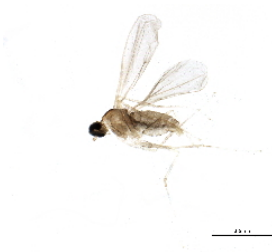

**BIOUG23073-F07 [Lateral]**  
Cecidomyiidae  
Family: Cecidomyiidae  
BIN URI: BOLD:ACV5110

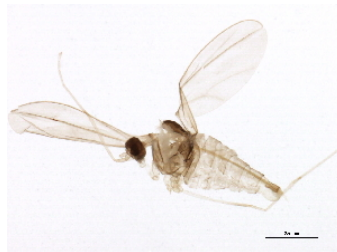

**BIOUG01437-H09 [Lateral]**  
Cecidomyiidae  
Family: Cecidomyiidae  
BIN URI: BOLD:ABA1219

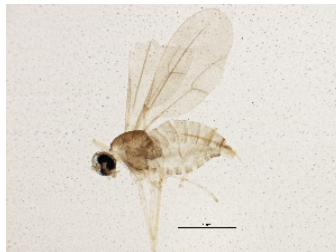

**BIOUG03001-F06 [Lateral]**  
Cecidomyiidae  
Family: Cecidomyiidae  
BIN URI: BOLD:ACA6105

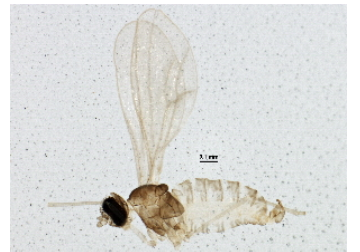

**BIOUG02893-F10 [Lateral]**  
Cecidomyiidae  
Family: Cecidomyiidae  
BIN URI: BOLD:ACB5167

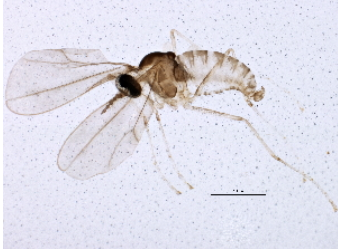

**BIOUG03039-B11 [Lateral]**  
Cecidomyiidae  
Family: Cecidomyiidae  
BIN URI: BOLD:ACC8041

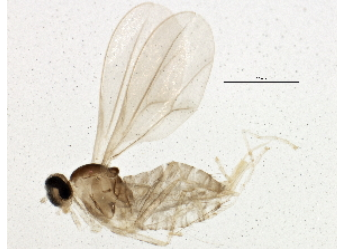

**BIOUG03066-H06 [Lateral]**  
Cecidomyiidae  
Family: Cecidomyiidae  
BIN URI: BOLD:ABW2751

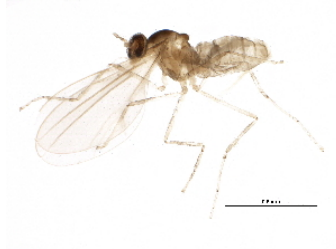

**BIOUG22299-E07 [Lateral]**  
Cecidomyiidae  
Family: Cecidomyiidae  
BIN URI: BOLD:ACA3288

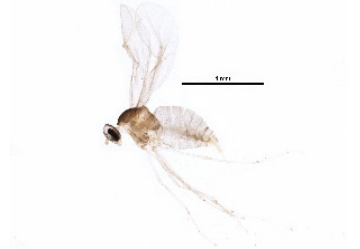

**BIOUG22278-B08 [Lateral]**  
Cecidomyiidae  
Family: Cecidomyiidae  
BIN URI: BOLD:ACV3885

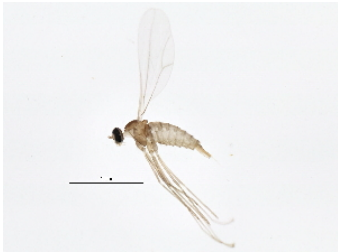

**10JSROW-1756 [Lateral]**  
Cecidomyiidae  
Family: Cecidomyiidae  
BIN URI: BOLD:AAV5325

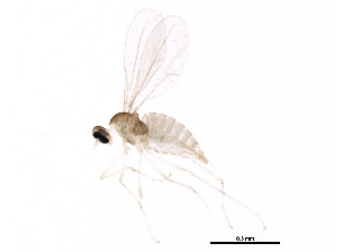

**BIOUG22460-G01 [Lateral]**  
Cecidomyiidae  
Family: Cecidomyiidae  
BIN URI: BOLD:ACV3079

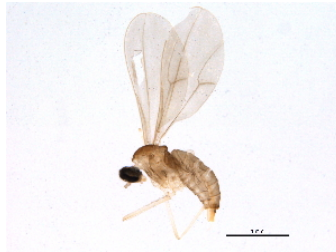

**BIOUG07465-H04 [Lateral]**  
Cecidomyiidae  
Family: Cecidomyiidae  
BIN URI: BOLD:ABX7483

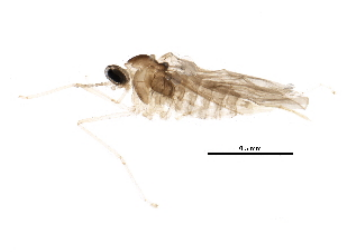

**BIOUG22462-G10 [Lateral]**  
Cecidomyiidae  
Family: Cecidomyiidae  
BIN URI: BOLD:ACV3083

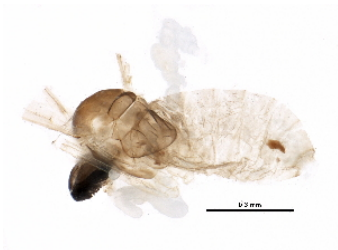

**BIOUG22861-E06 [Lateral]**  
Cecidomyiidae  
Family: Cecidomyiidae  
BIN URI: BOLD:ACV4945

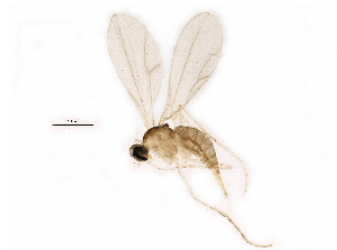

**BIOUG09219-E10 [Lateral]**  
Cecidomyiidae  
Family: Cecidomyiidae  
BIN URI: BOLD:ACK8692

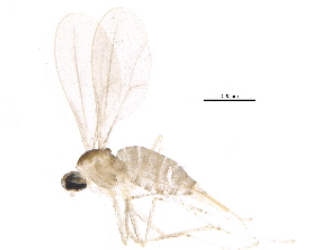

**BIOUG23080-E04 [Lateral]**  
Cecidomyiidae  
Family: Cecidomyiidae  
BIN URI: BOLD:ACW1275

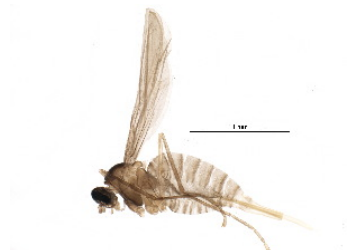

**BIOUG23077-E12 [Lateral]**  
Cecidomyiidae  
Family: Cecidomyiidae  
BIN URI: BOLD:ACU6072

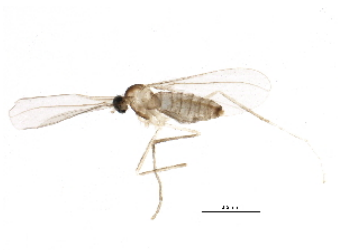

**BIOUG23072-D12 [Lateral]**  
Cecidomyiidae  
Family: Cecidomyiidae  
BIN URI: BOLD:ACV5761

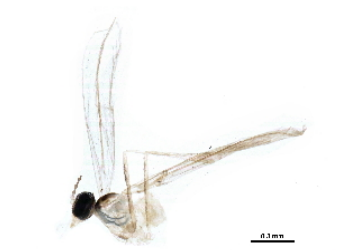

**BIOUG23323-A03 [Lateral]**  
Cecidomyiidae  
Family: Cecidomyiidae  
BIN URI: BOLD:ACW1108

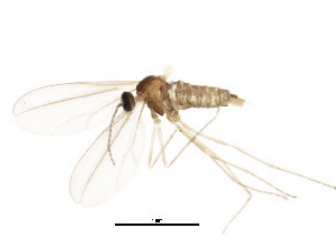

**BIOUG01426-D01 [Lateral]**  
Cecidomyiidae  
Family: Cecidomyiidae  
BIN URI: BOLD:ACC5578

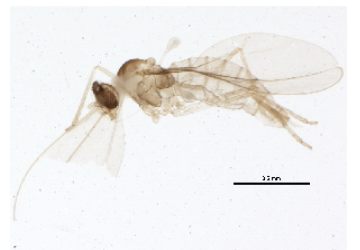

**BIOUG01444-C04 [Lateral]**  
Cecidomyiidae  
Family: Cecidomyiidae  
BIN URI: BOLD:AAY6432

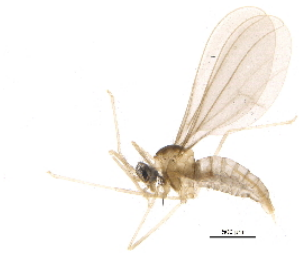

**BIOUG22717-B02 [Lateral]**  
Cecidomyiidae  
Family: Cecidomyiidae  
BIN URI: BOLD:ACV4441

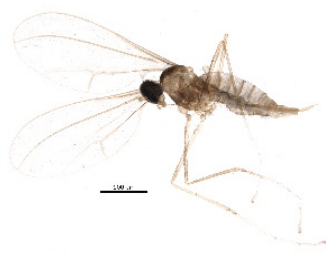

**BIOUG23083-F05 [Lateral]**  
Cecidomyiidae  
Family: Cecidomyiidae  
BIN URI: BOLD:ACW1309

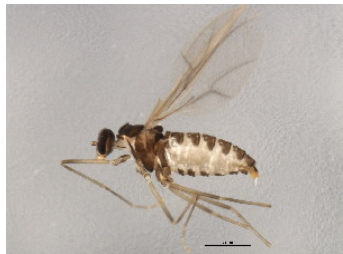

**10JSROW-0712 [Lateral]**  
Cecidomyiidae  
Family: Cecidomyiidae  
BIN URI: BOLD:AAV5358

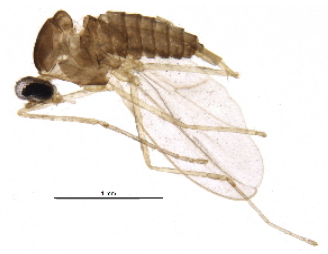

**BIOUG08515-E12 [Lateral]**  
Cecidomyiidae  
Family: Cecidomyiidae  
BIN URI: BOLD:ACK1253

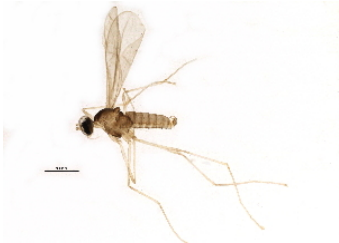

**BIOUG08875-A11 [Lateral]**  
Cecidomyiidae  
Family: Cecidomyiidae  
BIN URI: BOLD:ACK5235

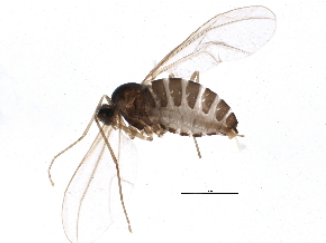

**BIOUG13080-B09 [Lateral]**  
Cecidomyiidae  
Family: Cecidomyiidae  
BIN URI: BOLD:ACJ8925

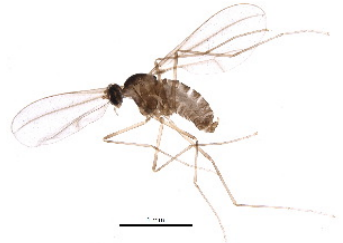

**BIOUG22353-B04 [Lateral]**  
Cecidomyiidae  
Family: Cecidomyiidae  
BIN URI: BOLD:ACV4007

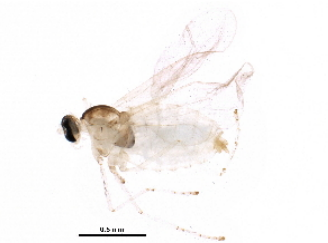

**BIOUG22460-D11 [Lateral]**  
Cecidomyiidae  
Family: Cecidomyiidae  
BIN URI: BOLD:ACV3021

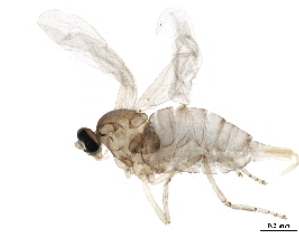

**BIOUG21985-D09 [Lateral]**  
Cecidomyiidae  
Family: Cecidomyiidae  
BIN URI: BOLD:ACU5220

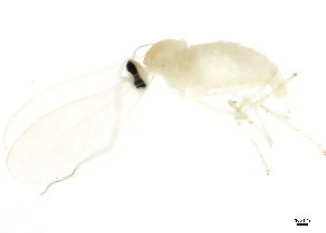

**BIOUG01348-A05 [Lateral]**  
Cecidomyiidae  
Family: Cecidomyiidae  
BIN URI: BOLD:ABW5461

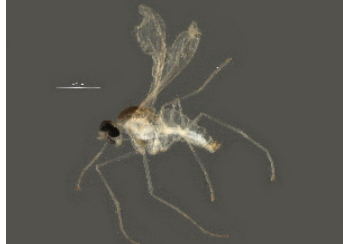

**BIOUG08875-G12 [Lateral]**  
Cecidomyiidae  
Family: Cecidomyiidae  
BIN URI: BOLD:ACK7254

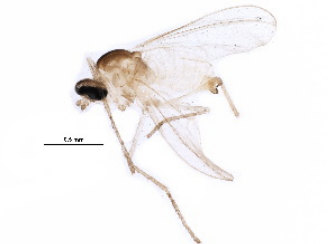

**BIOUG22452-F03 [Lateral]**  
Cecidomyiidae  
Family: Cecidomyiidae  
BIN URI: BOLD:ACV5276

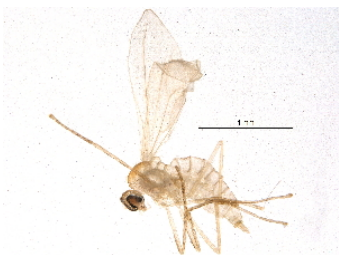

**BIOUG08481-F01 [Lateral]**  
Cecidomyiidae  
Family: Cecidomyiidae  
BIN URI: BOLD:ACJ8520

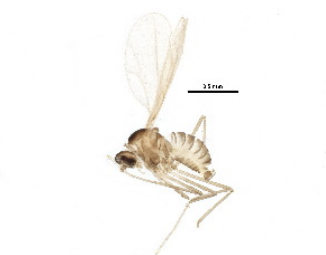

**BIOUG22291-E09 [Lateral]**  
Cecidomyiidae  
Family: Cecidomyiidae  
BIN URI: BOLD:ACV3127

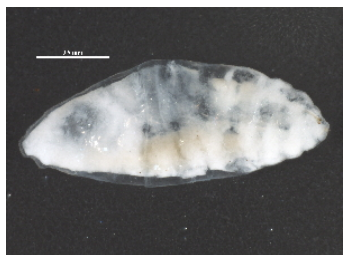

**BIOUG22634-H06 [Larva]**  
Cecidomyiidae  
Family: Cecidomyiidae  
BIN URI: BOLD:ACW1780

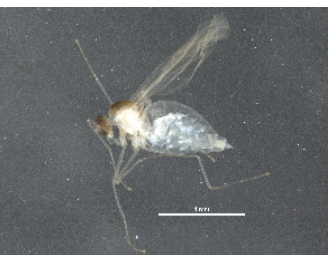

**BIOUG22291-F10 [Lateral]**  
Cecidomyiidae  
Family: Cecidomyiidae  
BIN URI: BOLD:ACV1921

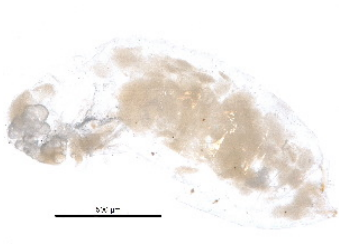

**BIOUG22634-H05 [Larva]**  
Cecidomyiidae  
Family: Cecidomyiidae  
BIN URI: BOLD:ACW2016

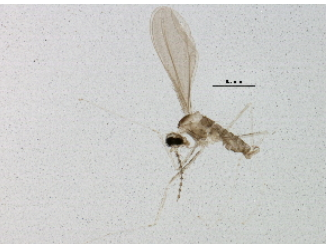

**BIOUG03510-F08 [Lateral]**  
Cecidomyiidae  
Family: Cecidomyiidae  
BIN URI: BOLD:AAN5238

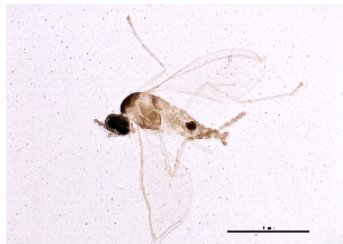

**BIOUG03125-F09 [Lateral]**  
Cecidomyiidae  
Family: Cecidomyiidae  
BIN URI: BOLD:ACR5313

**IMAGE NOT AVAILABLE**

**BIOUG23323-H05**  
Cecidomyiidae  
Family: Cecidomyiidae  
BIN URI: BOLD:ACW1135

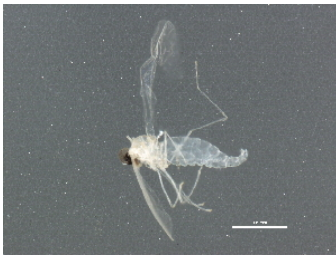

**BIOUG01126-E04 [Lateral]**  
 Cecidomyiidae  
 Family: Cecidomyiidae  
 BIN URI: BOLD: AAY6397

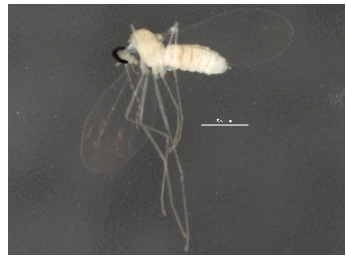

**BIOUG01337-E08 [Lateral]**  
 Cecidomyiidae  
 Family: Cecidomyiidae  
 BIN URI: BOLD: ABA7903

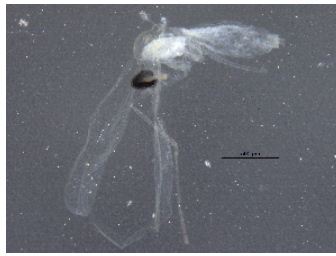

**BIOUG06996-F09 [Lateral]**  
 Cecidomyiidae  
 Family: Cecidomyiidae  
 BIN URI: BOLD: AC16169

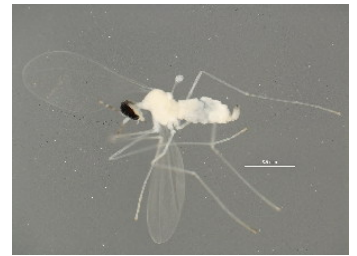

**BIOUG01553-A03 [Lateral]**  
 Cecidomyiidae  
 Family: Cecidomyiidae  
 BIN URI: BOLD: AAN5241

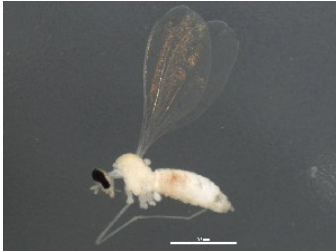

**BIOUG00942-G06 [Lateral]**  
 Cecidomyiidae  
 Family: Cecidomyiidae  
 BIN URI: BOLD: ABA0856

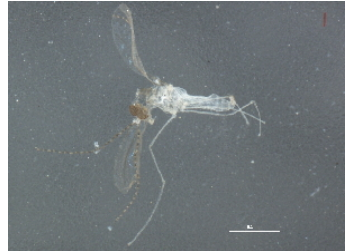

**BIOUG01123-E12 [Lateral]**  
 Cecidomyiidae  
 Family: Cecidomyiidae  
 BIN URI: BOLD: AAN5255

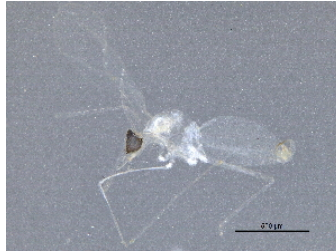

**BIOUG23081-A07 [Lateral]**  
 Cecidomyiidae  
 Family: Cecidomyiidae  
 BIN URI: BOLD: ACR0558

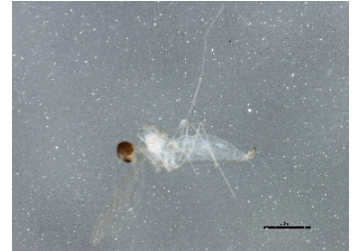

**BIOUG01447-F05 [Lateral]**  
 Cecidomyiidae  
 Family: Cecidomyiidae  
 BIN URI: BOLD: ABV0455

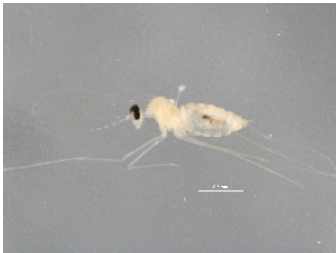

**BIOUG01426-F04 [Lateral]**  
 Cecidomyiidae  
 Family: Cecidomyiidae  
 BIN URI: BOLD: ACE7472

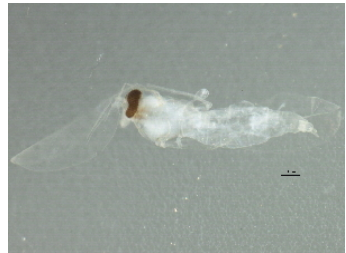

**BIOUG01488-E06 [Lateral]**  
 Cecidomyiidae  
 Family: Cecidomyiidae  
 BIN URI: BOLD: AAM6057

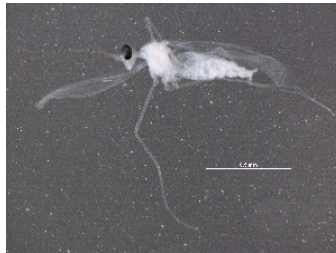

**BIOUG22865-A02 [Lateral]**  
 Cecidomyiidae  
 Family: Cecidomyiidae  
 BIN URI: BOLD: ACS1971

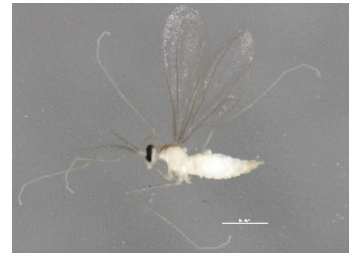

**BIOUG00819-D12 [Lateral]**  
 Cecidomyiidae  
 Family: Cecidomyiidae  
 BIN URI: BOLD: AAQ0296

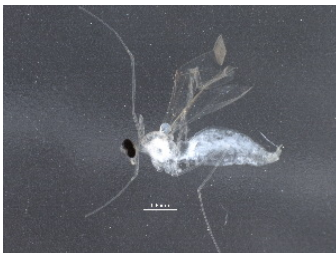

**BIOUG20809-D08 [Lateral]**  
 Diptera  
 BIN URI: BOLD: ACU6062

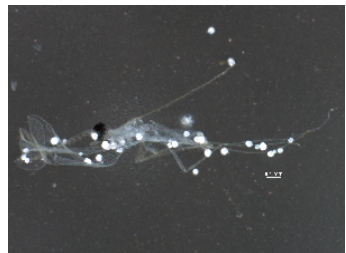

**BIOUG21408-A04 [Lateral]**  
 Diptera  
 BIN URI: BOLD: ACU6282

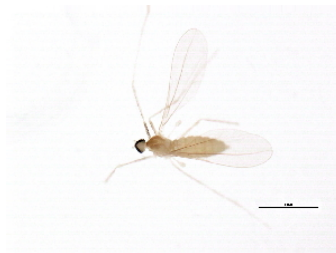

**08TTML-0762 [Dorsal]**  
 Cecidomyiidae  
 Family: Cecidomyiidae  
 BIN URI: BOLD: AAN5201

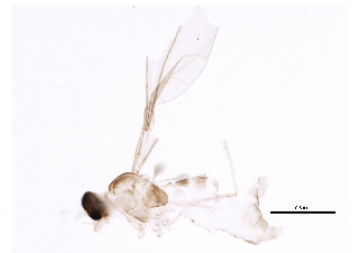

**BIOUG01446-F12 [Lateral]**  
 Cecidomyiidae  
 Family: Cecidomyiidae  
 BIN URI: BOLD: AAZ0297

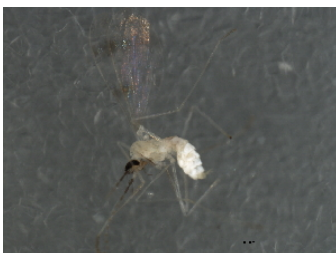

**09BBEDI-1778 [Lateral]**  
 Cecidomyiidae  
 Family: Cecidomyiidae  
 BIN URI: BOLD: AAH3734

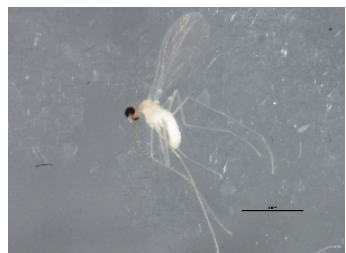

**08TTML-1161 [Lateral]**  
 Cecidomyiidae  
 Family: Cecidomyiidae  
 BIN URI: BOLD: AAN5227

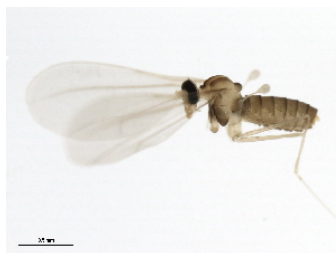

**10JSROW-1370 [Lateral]**  
 Cecidomyiidae  
 Family: Cecidomyiidae  
 BIN URI: BOLD: AAH3664

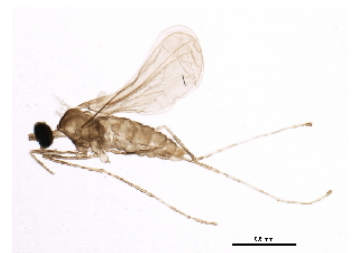

**BIOUG01126-A05 [Lateral]**  
 Cecidomyiidae  
 Family: Cecidomyiidae  
 BIN URI: BOLD: ACF4901

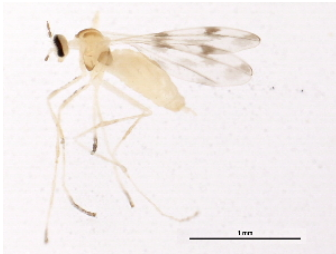

**08TTML-2468 [Lateral]**  
Cecidomyiidae  
Family: Cecidomyiidae  
BIN URI: BOLD:AAAN5183

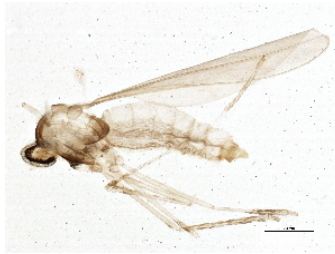

**BIOUG02901-C01 [Lateral]**  
Cecidomyiidae  
Family: Cecidomyiidae  
BIN URI: BOLD:AAV5569

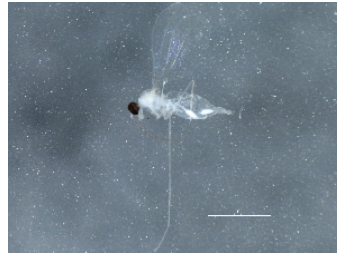

**BIOUG01477-C12 [Lateral]**  
Cecidomyiidae  
Family: Cecidomyiidae  
BIN URI: BOLD:AAQ2553

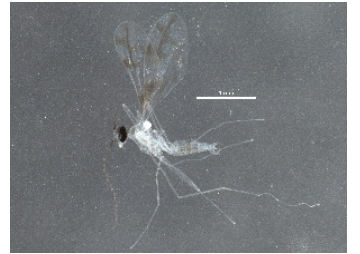

**BIOUG22732-D10 [Lateral]**  
Cecidomyiidae  
Family: Cecidomyiidae  
BIN URI: BOLD:ACV4936

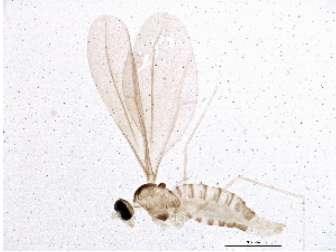

**BIOUG02895-D01 [Lateral]**  
Cecidomyiidae  
Family: Cecidomyiidae  
BIN URI: BOLD:ACB4105

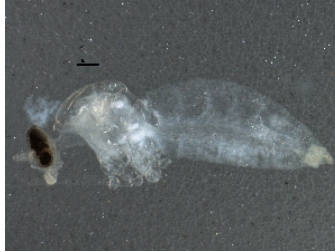

**BIOUG02516-E07 [Lateral]**  
Cecidomyiidae  
Family: Cecidomyiidae  
BIN URI: BOLD:AAH3661

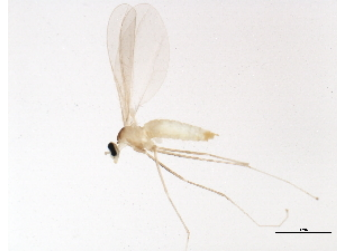

**BIOUG00832-D11 [Dorsal]**  
Cecidomyiidae  
Family: Cecidomyiidae  
BIN URI: BOLD:AAV5568

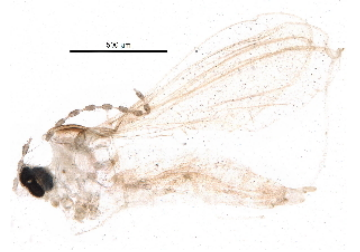

**BIOUG23083-C08 [Lateral]**  
Cecidomyiidae  
Family: Cecidomyiidae  
BIN URI: BOLD:ACW0871

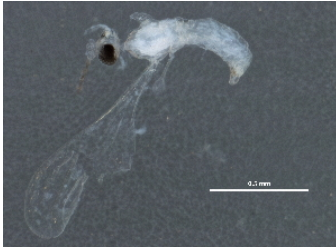

**BIOUG02510-D01 [Lateral]**  
Cecidomyiidae  
Family: Cecidomyiidae  
BIN URI: BOLD:AAAN5242

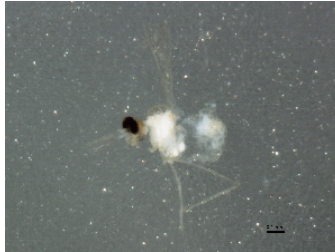

**BIOUG00900-E11 [Lateral]**  
Cecidomyiidae  
Family: Cecidomyiidae  
BIN URI: BOLD:AAAY6111

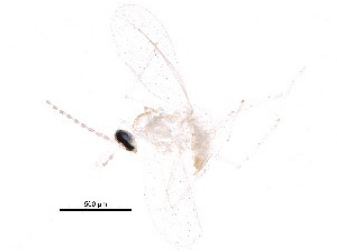

**BIOUG21849-D07 [Lateral]**  
Diptera  
BIN URI: BOLD:ACC8079

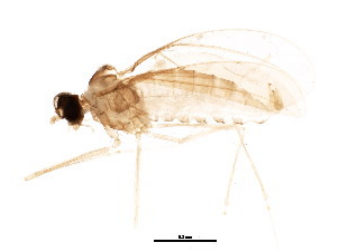

**BIOUG01622-D10 [Lateral]**  
Cecidomyiidae  
Family: Cecidomyiidae  
BIN URI: BOLD:ABV1287

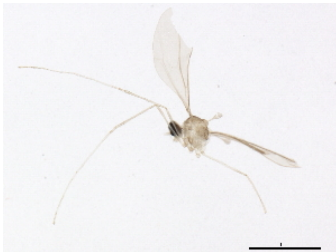

**BIOUG01123-H06 [Lateral]**  
Cecidomyiidae  
Family: Cecidomyiidae  
BIN URI: BOLD:AAU6474

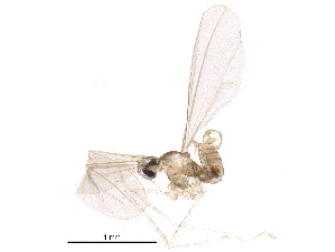

**BIOUG23080-F01 [Lateral]**  
Cecidomyiidae  
Family: Cecidomyiidae  
BIN URI: BOLD:ACW1008

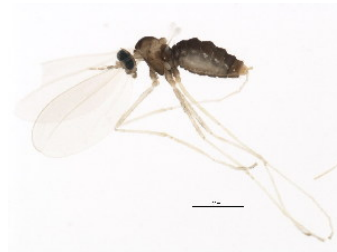

**BIOUG00942-E09 [Lateral]**  
Cecidomyiidae  
Family: Cecidomyiidae  
BIN URI: BOLD:AAAN5199

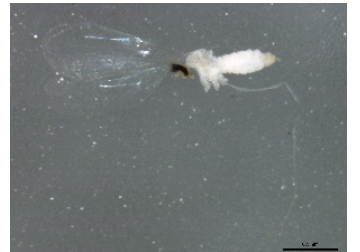

**BIOUG01447-F12 [Lateral]**  
Cecidomyiidae  
Family: Cecidomyiidae  
BIN URI: BOLD:ABA0860

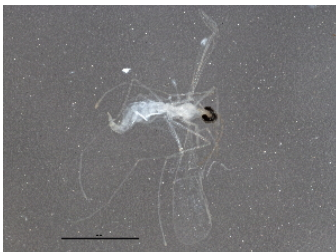

**BIOUG02633-B03 [Lateral]**  
Cecidomyiidae  
Family: Cecidomyiidae  
BIN URI: BOLD:ABX7943

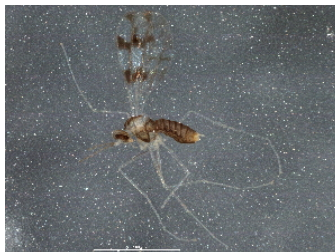

**BIOUG02775-C02 [Lateral]**  
Cecidomyiidae  
Family: Cecidomyiidae  
BIN URI: BOLD:ACA1917

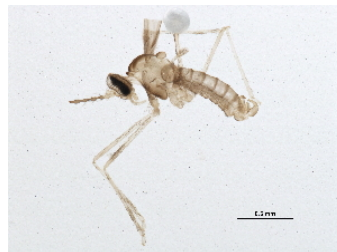

**BIOUG10551-G08 [Lateral]**  
Cecidomyiidae  
Family: Cecidomyiidae  
BIN URI: BOLD:ACL6055

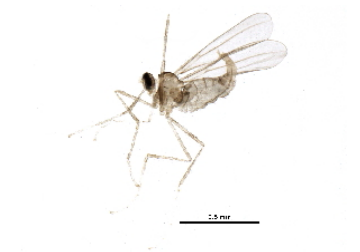

**BIOUG23073-F12 [Lateral]**  
Cecidomyiidae  
Family: Cecidomyiidae  
BIN URI: BOLD:ACV5875

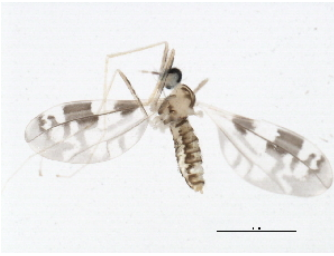

**BIOUG00832-F05 [Dorsal]**  
Cecidomyiidae  
Family: Cecidomyiidae  
BIN URI: BOLD:AAH3760

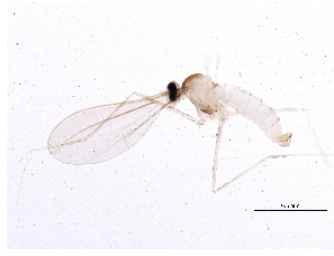

**BIOUG10226-B10 [Lateral]**  
Cecidomyiidae  
Family: Cecidomyiidae  
BIN URI: BOLD:ACC5649

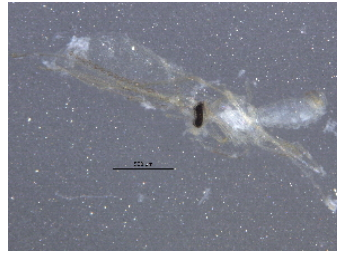

**BIOUG08606-H06 [Lateral]**  
Cecidomyiidae  
Family: Cecidomyiidae  
BIN URI: BOLD:ABW5545

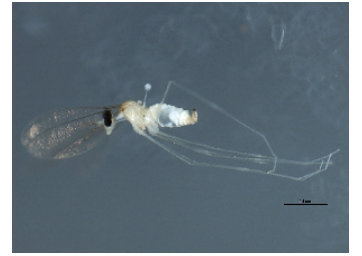

**09BBEDI-2567 [Lateral]**  
Cecidomyiidae  
Family: Cecidomyiidae  
BIN URI: BOLD:ABY8401

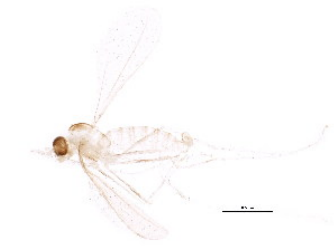

**BIOUG01610-A11 [Lateral]**  
Cecidomyiidae  
Family: Cecidomyiidae  
BIN URI: BOLD:ABV1341

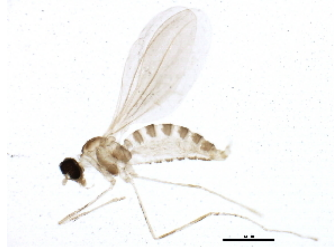

**BIOUG01120-A04 [Lateral]**  
Cecidomyiidae  
Family: Cecidomyiidae  
BIN URI: BOLD:AAN5264

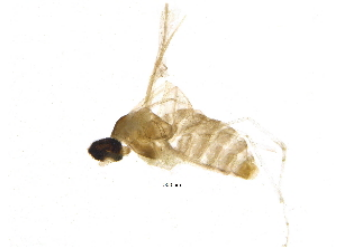

**BIOUG02852-D12 [Lateral]**  
Cecidomyiidae  
Family: Cecidomyiidae  
BIN URI: BOLD:ACE6123

**IMAGE NOT AVAILABLE**

**BIOUG10815-F12**  
Cecidomyiidae  
Family: Cecidomyiidae  
BIN URI: BOLD:ACL9909

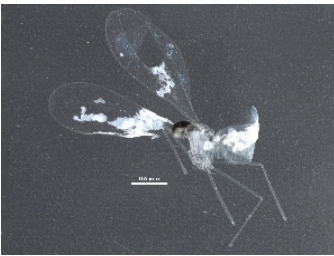

**BIOUG22730-E03 [Lateral]**  
Cecidomyiidae  
Family: Cecidomyiidae  
BIN URI: BOLD:ACV6072

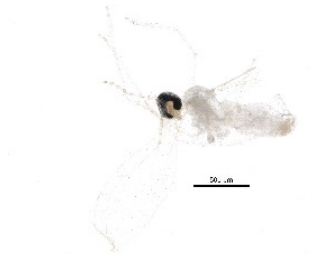

**BIOUG24024-F05 [Lateral]**  
Cecidomyiidae  
Family: Cecidomyiidae

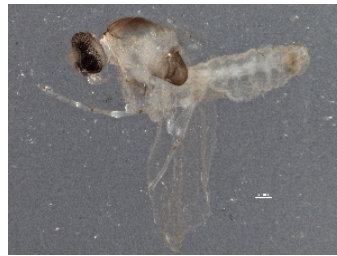

**BIOUG04421-A12 [Lateral]**  
Cecidomyiidae  
Family: Cecidomyiidae  
BIN URI: BOLD:ACC8231

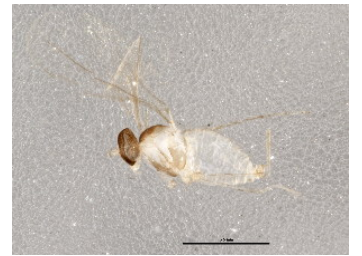

**BIOUG01447-A02 [Lateral]**  
Cecidomyiidae  
Family: Cecidomyiidae  
BIN URI: BOLD:ABV9336

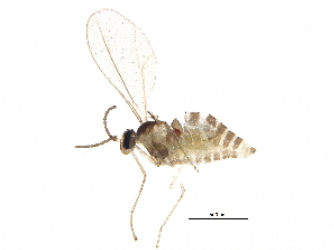

**BIOUG16030-E06 [Lateral]**  
Cecidomyiidae  
Family: Cecidomyiidae  
BIN URI: BOLD:ACP9644

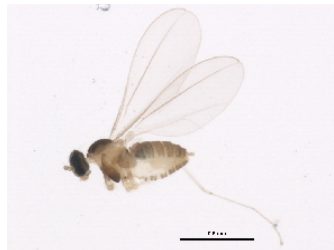

**BIOUG01403-B10 [Lateral]**  
Cecidomyiidae  
Family: Cecidomyiidae  
BIN URI: BOLD:AAV5322

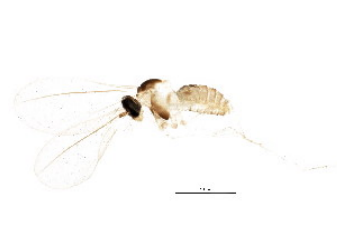

**BIOUG01515-B01 [Lateral]**  
Cecidomyiidae  
Family: Cecidomyiidae  
BIN URI: BOLD:ABW8031

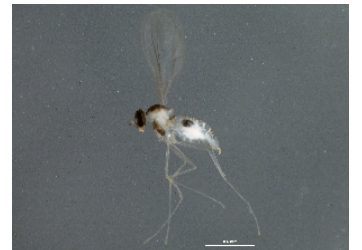

**BIOUG01512-F05 [Lateral]**  
Cecidomyiidae  
Family: Cecidomyiidae  
BIN URI: BOLD:ABV1316

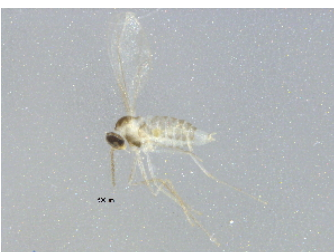

**BIOUG03823-E06 [Lateral]**  
Cecidomyiidae  
Family: Cecidomyiidae  
BIN URI: BOLD:ACE9303

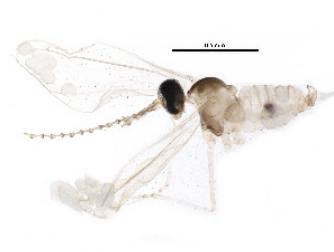

**BIOUG22732-A10 [Lateral]**  
Cecidomyiidae  
Family: Cecidomyiidae  
BIN URI: BOLD:ACF4988

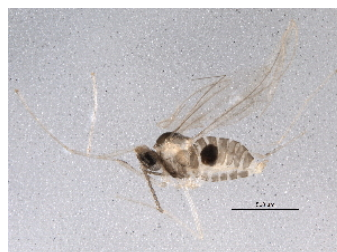

**BIOUG09997-A08 [Lateral]**  
Cecidomyiidae  
Family: Cecidomyiidae  
BIN URI: BOLD:ACK2706

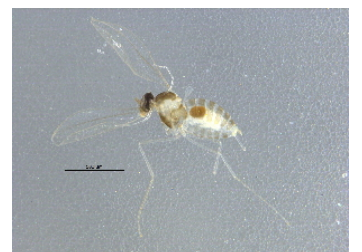

**BIOUG03825-G11 [Lateral]**  
Cecidomyiidae  
Family: Cecidomyiidae  
BIN URI: BOLD:ACF0947

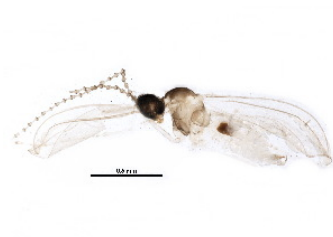

**BIOUG22731-E04 [Lateral]**  
Cecidomyiidae  
Family: Cecidomyiidae  
BIN URI: BOLD:ACV5585

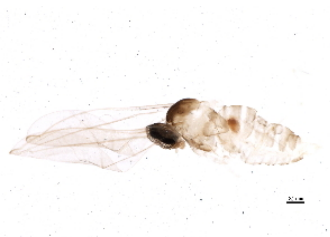

**BIOUG01512-H01 [Lateral]**  
Cecidomyiidae  
Family: Cecidomyiidae  
BIN URI: BOLD:ABV0456

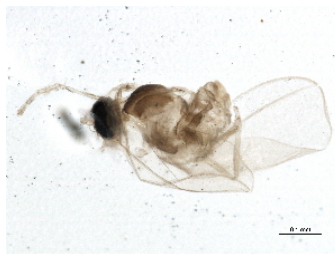

**BIOUG12367-B09 [Lateral]**  
Cecidomyiidae  
Family: Cecidomyiidae  
BIN URI: BOLD:ACN1655

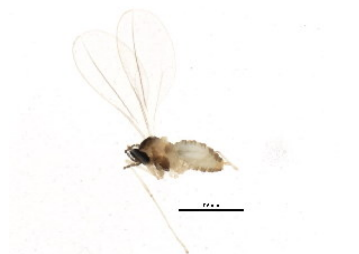

**BIOUG01345-H10 [Lateral]**  
Cecidomyiidae  
Family: Cecidomyiidae  
BIN URI: BOLD:AAM6117

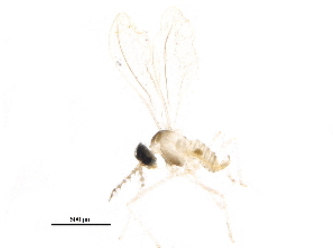

**BIOUG22865-A10 [Lateral]**  
Cecidomyiidae  
Family: Cecidomyiidae  
BIN URI: BOLD:ABX8054

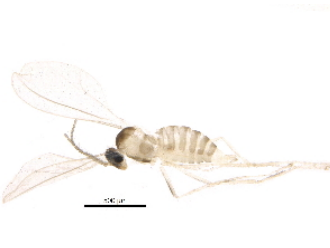

**BIOUG22717-F08 [Lateral]**  
Cecidomyiidae  
Family: Cecidomyiidae  
BIN URI: BOLD:AAN5256

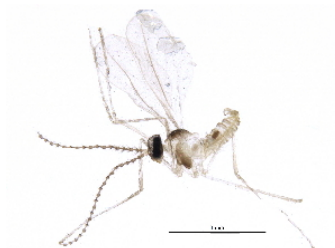

**BIOUG08604-H09 [Lateral]**  
Cecidomyiidae  
Family: Cecidomyiidae  
BIN URI: BOLD:ACK2103

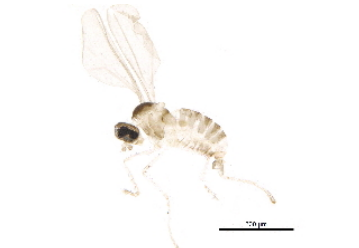

**BIOUG23079-F01 [Lateral]**  
Cecidomyiidae  
Family: Cecidomyiidae  
BIN URI: BOLD:ACA7277

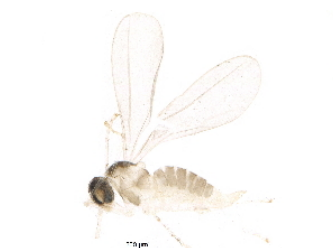

**BIOUG23081-F03 [Lateral]**  
Cecidomyiidae  
Family: Cecidomyiidae  
BIN URI: BOLD:ACL9468

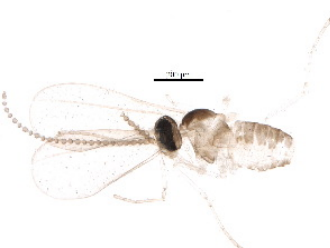

**BIOUG23084-F02 [Lateral]**  
Cecidomyiidae  
Family: Cecidomyiidae  
BIN URI: BOLD:ACW0962

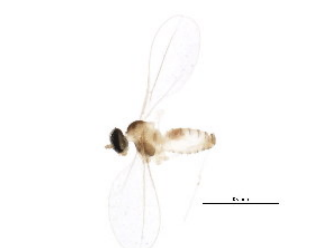

**BIOUG01426-A01 [Lateral]**  
Cecidomyiidae  
Family: Cecidomyiidae  
BIN URI: BOLD:AAG8290

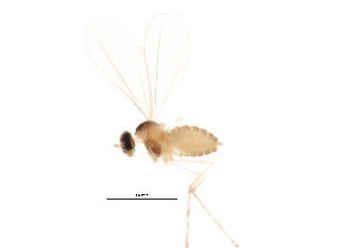

**BIOUG01406-D04 [Lateral]**  
Cecidomyiidae  
Family: Cecidomyiidae  
BIN URI: BOLD:ACE3233

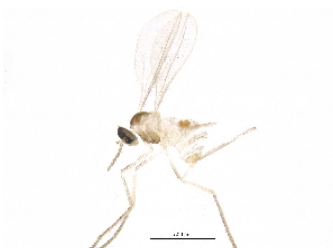

**BIOUG09651-F06 [Lateral]**  
Cecidomyiidae  
Family: Cecidomyiidae  
BIN URI: BOLD:ACF3882

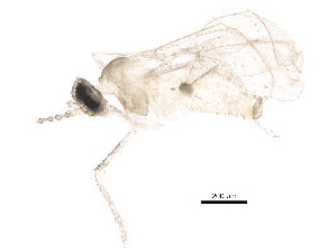

**BIOUG23315-C12 [Lateral]**  
Cecidomyiidae  
Family: Cecidomyiidae  
BIN URI: BOLD:ACW1232

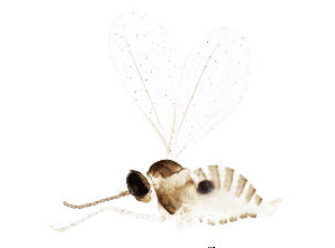

**BIOUG01514-F03 [Lateral]**  
Cecidomyiidae  
Family: Cecidomyiidae  
BIN URI: BOLD:ABV9078

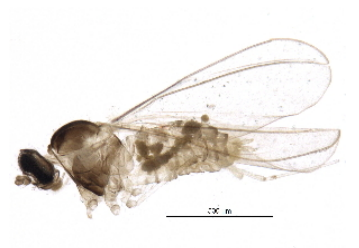

**BIOUG12325-G03 [Lateral]**  
Cecidomyiidae  
Family: Cecidomyiidae  
BIN URI: BOLD:AAH3749

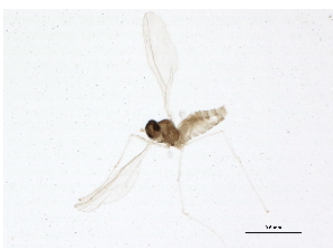

**BIOUG01442-H10 [Lateral]**  
Cecidomyiidae  
Family: Cecidomyiidae  
BIN URI: BOLD:ABA0817

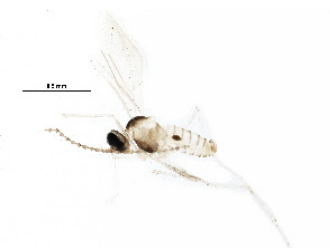

**BIOUG22466-G10 [Lateral]**  
Cecidomyiidae  
Family: Cecidomyiidae  
BIN URI: BOLD:ABY8137

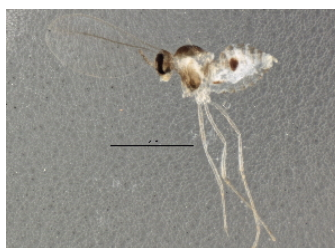

**BIOUG03130-G12 [Lateral]**  
Cecidomyiidae  
Family: Cecidomyiidae  
BIN URI: BOLD:ABZ7164

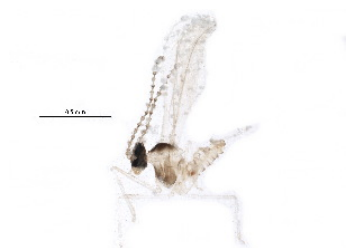

**BIOUG22731-F03 [Lateral]**  
Cecidomyiidae  
Family: Cecidomyiidae  
BIN URI: BOLD:ACE3131

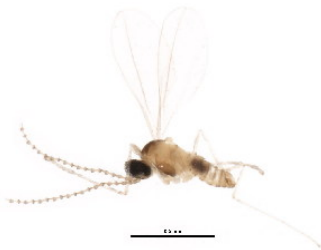

**BIOUG01406-D12 [Lateral]**  
 Cecidomyiidae  
 Family: Cecidomyiidae  
 BIN URI: BOLD:ACE8735

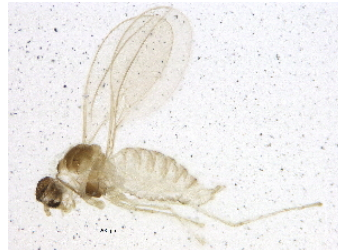

**BIOUG01123-C02 [Lateral]**  
 Cecidomyiidae  
 Family: Cecidomyiidae  
 BIN URI: BOLD:ACE5281

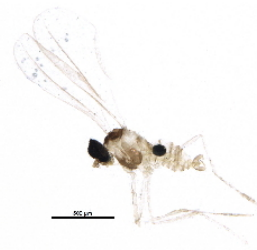

**BIOUG06996-F07 [Lateral]**  
 Cecidomyiidae  
 Family: Cecidomyiidae  
 BIN URI: BOLD:ACI3047

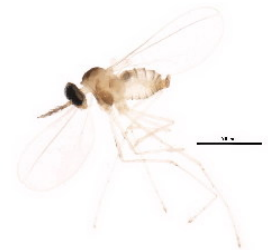

**BIOUG01423-C01 [Lateral]**  
 Cecidomyiidae  
 Family: Cecidomyiidae  
 BIN URI: BOLD:ACE5277

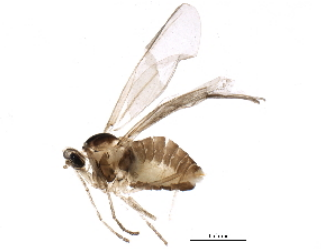

**BIOUG22084-D10 [Lateral]**  
 Cecidomyiidae  
 Family: Cecidomyiidae  
 BIN URI: BOLD:ABX6610

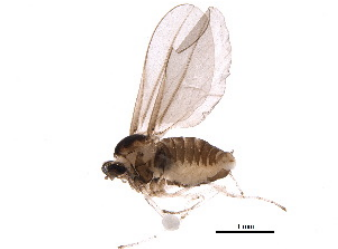

**BIOUG22454-E02 [Lateral]**  
 Cecidomyiidae  
 Family: Cecidomyiidae  
 BIN URI: BOLD:ACV3932

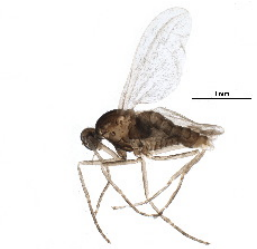

**BIOUG22291-G10 [Lateral]**  
 Cecidomyiidae  
 Family: Cecidomyiidae  
 BIN URI: BOLD:ACV1942

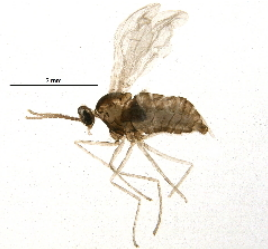

**BIOUG10606-B06 [Lateral]**  
 Cecidomyiidae  
 Family: Cecidomyiidae  
 BIN URI: BOLD:ACL6802

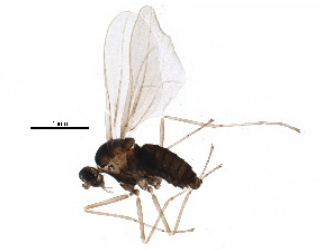

**BIOUG22420-A03 [Lateral]**  
 Cecidomyiidae  
 Family: Cecidomyiidae  
 BIN URI: BOLD:ACV1904

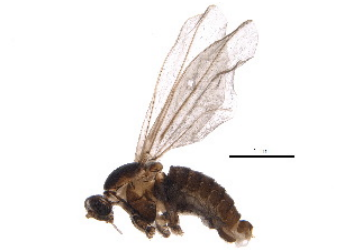

**BIOUG22357-H05 [Lateral]**  
 Cecidomyiidae  
 Family: Cecidomyiidae  
 BIN URI: BOLD:ACV3952

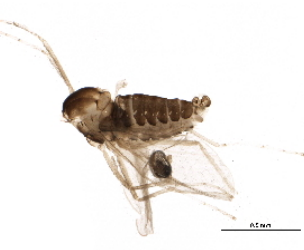

**BIOUG22462-F02 [Lateral]**  
 Cecidomyiidae  
 Family: Cecidomyiidae  
 BIN URI: BOLD:ACV3224

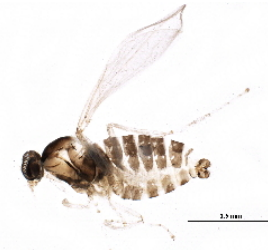

**BIOUG22364-F06 [Lateral]**  
 Cecidomyiidae  
 Family: Cecidomyiidae  
 BIN URI: BOLD:ACV4404

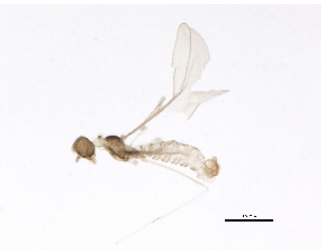

**BIOUG01442-F05 [Lateral]**  
 Cecidomyiidae  
 Family: Cecidomyiidae  
 BIN URI: BOLD:AAH3743

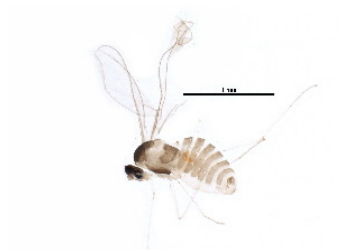

**BIOUG23077-B11 [Lateral]**  
 Orseolia  
 Family: Cecidomyiidae  
 BIN URI: BOLD:ACV5413

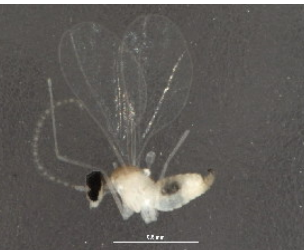

**BIOUG01345-E06 [Lateral]**  
 Cecidomyiidae  
 Family: Cecidomyiidae  
 BIN URI: BOLD:ABV1473

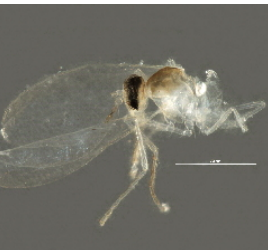

**BIOUG08601-A11 [Lateral]**  
 Cecidomyiidae  
 Family: Cecidomyiidae  
 BIN URI: BOLD:ACK1237

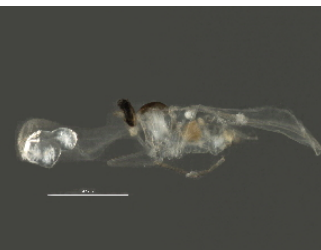

**BIOUG08603-F03 [Lateral]**  
 Cecidomyiidae  
 Family: Cecidomyiidae  
 BIN URI: BOLD:ACK1745

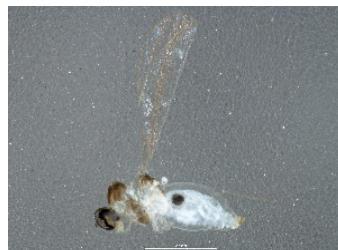

**BIOUG01508-B09 [Lateral]**  
 Cecidomyiidae  
 Family: Cecidomyiidae  
 BIN URI: BOLD:AAY6429

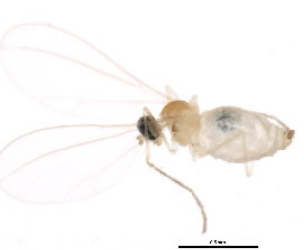

**BIOUG00942-C06 [Lateral]**  
 Cecidomyiidae  
 Family: Cecidomyiidae  
 BIN URI: BOLD:AAY6463

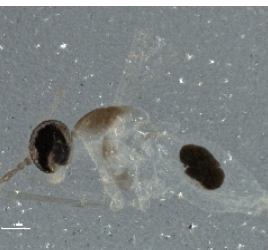

**BIOUG02939-B12 [Lateral]**  
 Cecidomyiidae  
 Family: Cecidomyiidae  
 BIN URI: BOLD:ACA5760

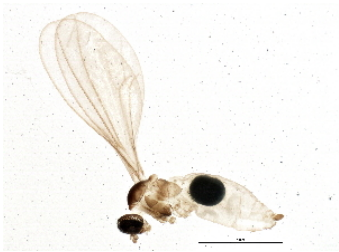

**BIOUG02904-E03 [Lateral]**  
Cecidomyiidae  
Family: Cecidomyiidae  
BIN URI: BOLD:AAH3770

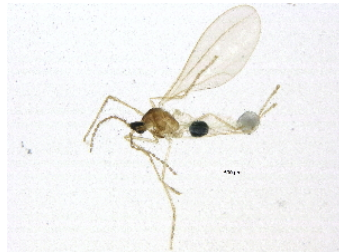

**BIOUG03756-C07 [Lateral]**  
Cecidomyiidae  
Family: Cecidomyiidae  
BIN URI: BOLD:ABW8065

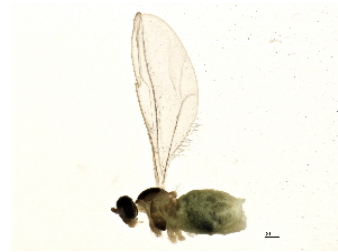

**BIOUG10729-A02 [Lateral]**  
Cecidomyiidae  
Family: Cecidomyiidae  
BIN URI: BOLD:ACL1931

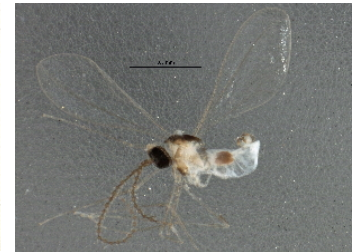

**BIOUG03924-B09 [Lateral]**  
Cecidomyiidae  
Family: Cecidomyiidae  
BIN URI: BOLD:ACA6463

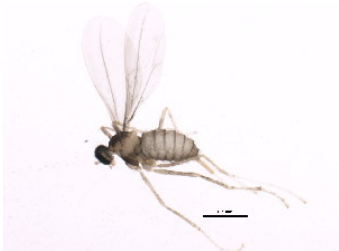

**BIOUG00860-F07 [Lateral]**  
Cecidomyiidae  
Family: Cecidomyiidae  
BIN URI: BOLD:ABA0829

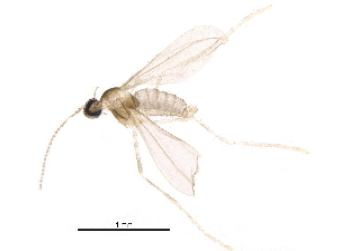

**BIOUG22717-G10 [Lateral]**  
Cecidomyiidae  
Family: Cecidomyiidae  
BIN URI: BOLD:ACV3844

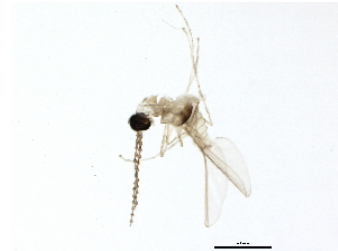

**BIOUG01118-H01 [Lateral]**  
Cecidomyiidae  
Family: Cecidomyiidae  
BIN URI: BOLD:AAV6380

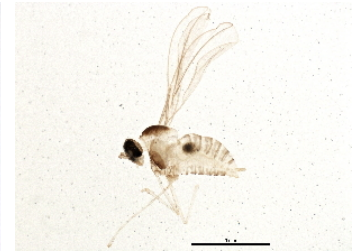

**BIOUG02903-D09 [Lateral]**  
Cecidomyiidae  
Family: Cecidomyiidae  
BIN URI: BOLD:ABA0840

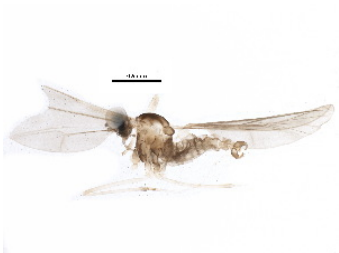

**BIOUG22725-E08 [Lateral]**  
Cecidomyiidae  
Family: Cecidomyiidae  
BIN URI: BOLD:ACV5112

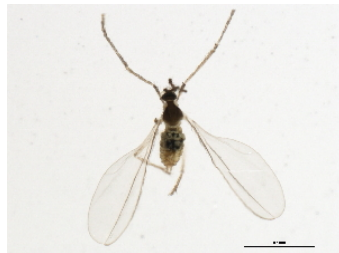

**BIOUG00832-G10 [Lateral]**  
Cecidomyiidae  
Family: Cecidomyiidae  
BIN URI: BOLD:AAV6374

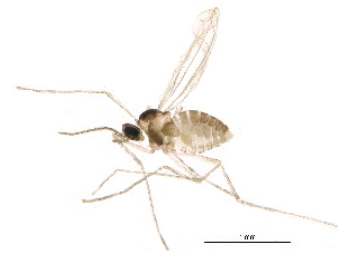

**BIOUG23079-F03 [Lateral]**  
Cecidomyiidae  
Family: Cecidomyiidae  
BIN URI: BOLD:ACE9686

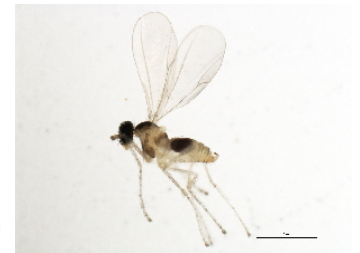

**BIOUG00832-G11 [Dorsal]**  
Cecidomyiidae  
Family: Cecidomyiidae  
BIN URI: BOLD:ABA0818

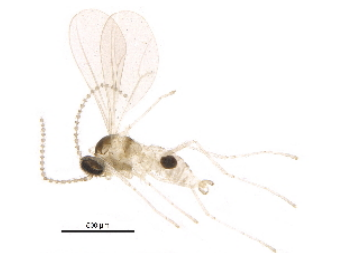

**BIOUG22287-F07 [Lateral]**  
Cecidomyiidae  
Family: Cecidomyiidae  
BIN URI: BOLD:ACA6770

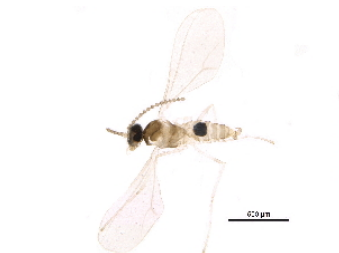

**BIOUG22329-C11 [Lateral]**  
Cecidomyiidae  
Family: Cecidomyiidae  
BIN URI: BOLD:ACA9545

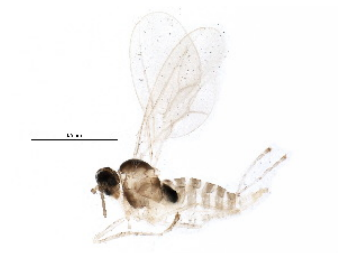

**BIOUG19779-A10 [Lateral]**  
Cecidomyiidae  
Family: Cecidomyiidae  
BIN URI: BOLD:ACT3440

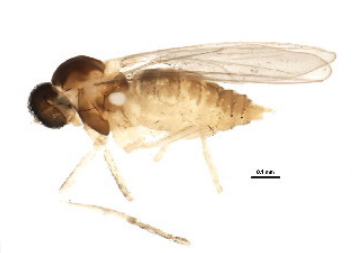

**BIOUG01543-D03 [Lateral]**  
Cecidomyiidae  
Family: Cecidomyiidae  
BIN URI: BOLD:ABV0494

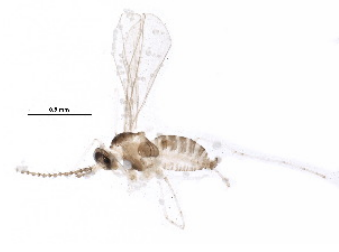

**BIOUG22731-G03 [Lateral]**  
Cecidomyiidae  
Family: Cecidomyiidae  
BIN URI: BOLD:ACE8808

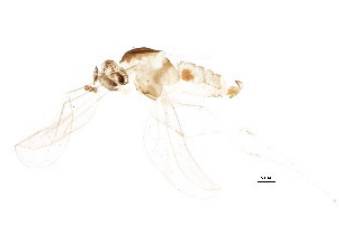

**BIOUG01514-F06 [Lateral]**  
Cecidomyiidae  
Family: Cecidomyiidae  
BIN URI: BOLD:ABW8018

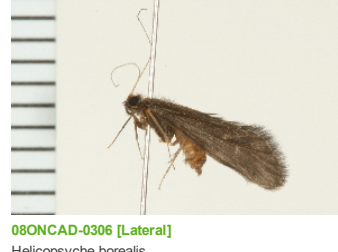

**08ONCAD-0306 [Lateral]**  
Helicopsyche borealis  
Family: Helicopsychidae  
BIN URI: BOLD:AAA4316

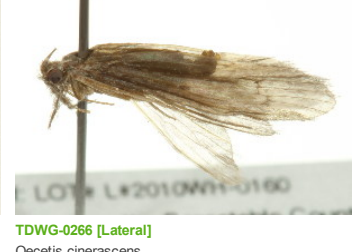

**TDWG-0266 [Lateral]**  
Oecetis cinerascens  
Family: Leptoceridae  
BIN URI: BOLD:AAA5652



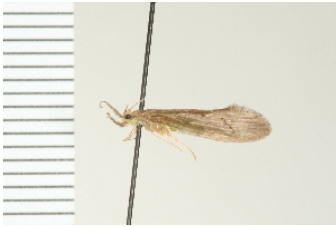

**08ONCAD-0274 [Lateral]**  
*Oecetis avara*  
 Family: Leptoceridae  
 BIN URI: BOLD:AAB0303

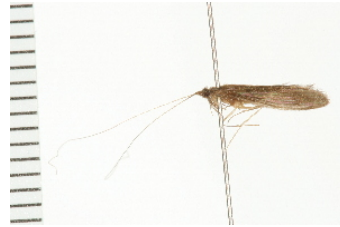

**08MBCAD-0178 [Lateral]**  
*Oecetis inconspicua*  
 Family: Leptoceridae  
 BIN URI: BOLD:AAA1532

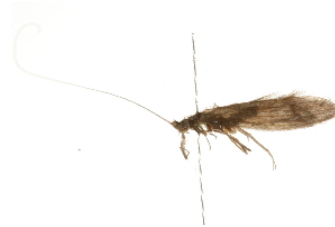

**10BBCAD-067 [Lateral]**  
*Oecetis nocturna*  
 Family: Leptoceridae  
 BIN URI: BOLD:AAB4389

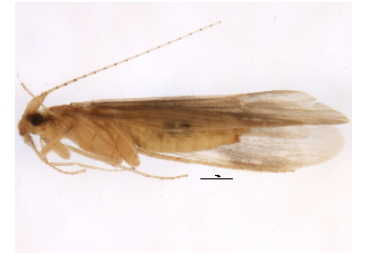

**07ELEPT-315 [Lateral]**  
*Trienodes tardus*  
 Family: Leptoceridae  
 BIN URI: BOLD:ABY4173

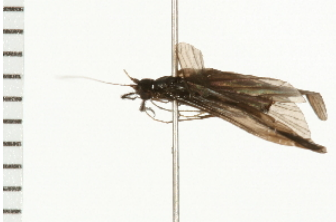

**08ONCAD-0543 [Lateral]**  
*Mystacides sepulchralis*  
 Family: Leptoceridae  
 BIN URI: BOLD:ACF0896

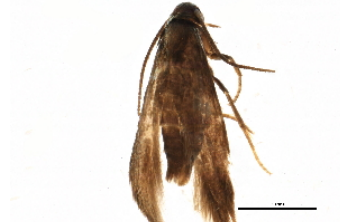

**BIOUG08878-E02 [Dorsal]**  
*Heliozela*  
 Family: Heliozelidae  
 BIN URI: BOLD:ACK4960

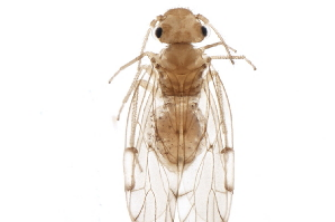

**BIOUG00771-D06 [Dorsal]**  
*Ectopsocus meridionalis*  
 Family: Ectopsocidae  
 BIN URI: BOLD:AAM8931

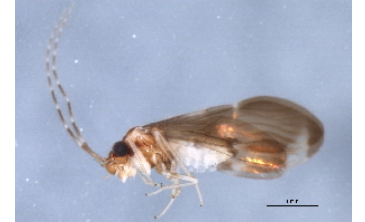

**08TTML-2758 [Lateral]**  
*Polypsocus corruptus*  
 Family: Amphipsocidae  
 BIN URI: BOLD:AAM8933

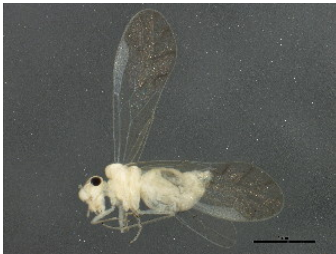

**BIOUG01239-C11 [Lateral]**  
*Valenzuela*  
 Family: Caeciliusidae  
 BIN URI: BOLD:AAM8930

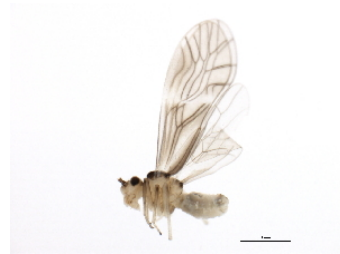

**10BBSIO-0135 [Lateral]**  
*Valenzuela flavidus*  
 Family: Caeciliusidae  
 BIN URI: BOLD:AAH3228

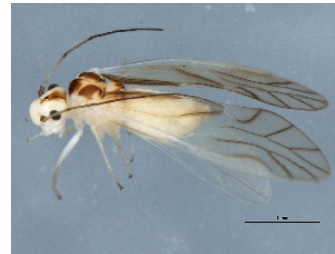

**08TTML-2699 [Lateral]**  
*Valenzuela flavidus*  
 Family: Caeciliusidae  
 BIN URI: BOLD:AAN8447

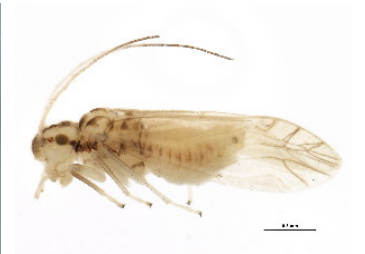

**BIOUG01239-D01 [Lateral]**  
*Caeciliusidae*  
 Family: Caeciliusidae  
 BIN URI: BOLD:ACA3113

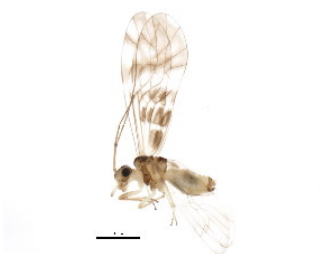

**BIOUG01239-E11 [Lateral]**  
*Graphopsocus cruciatus*  
 Family: Stenopsocidae  
 BIN URI: BOLD:ACA2933

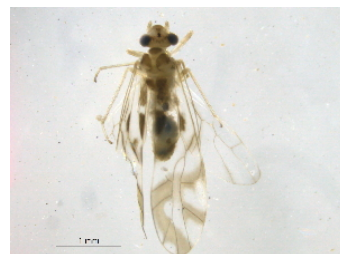

**BIOUG16752-D01 [Dorsal]**  
*Graphopsocus cruciatus*  
 Family: Stenopsocidae  
 BIN URI: BOLD:ACB0984

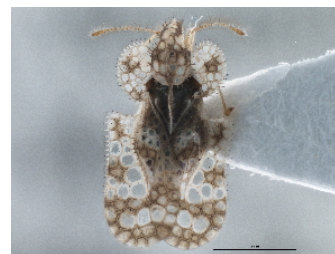

**CCDB-21316-G02 [Dorsal]**  
*Corythucha marmorata*  
 Family: Tingidae  
 BIN URI: BOLD:AAR9127

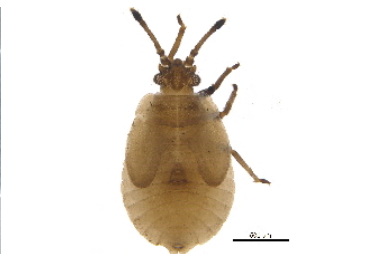

**BIOUG21881-A11 [Dorsal]**  
*Acalypta*  
 Family: Tingidae  
 BIN URI: BOLD:ACW0228

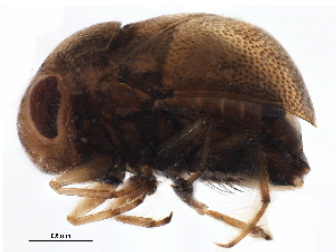

**BIOUG24012-H09 [Lateral]**  
*Neoplea*  
 Family: Pleidae

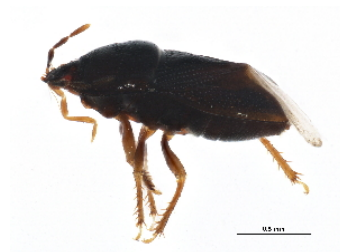

**BIOUG24015-H01 [Lateral]**  
 Family: Cydnidae

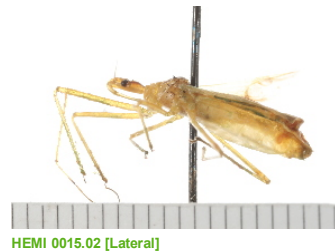

**HEMI 0015.02 [Lateral]**  
*Zelus luridus*  
 Family: Reduviidae  
 BIN URI: BOLD:AAG2724

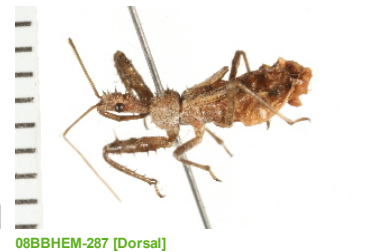

**08BBHEM-287 [Dorsal]**  
*Sinea diadema*  
 Family: Reduviidae  
 BIN URI: BOLD:AAH9651

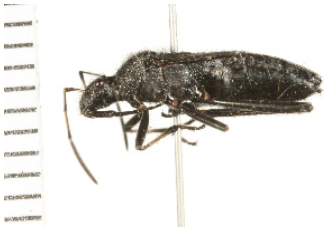

**08BBHEM-144 [Lateral]**  
*Alydus eurinus*  
Family: Alydidae  
BIN URI: BOLD:AAC7993

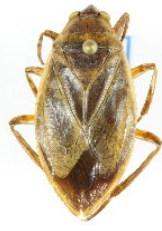

**CNC#HEM301054 [Dorsal]**  
*Belostoma*  
Family: Belostomatidae  
BIN URI: BOLD:AAZ0987

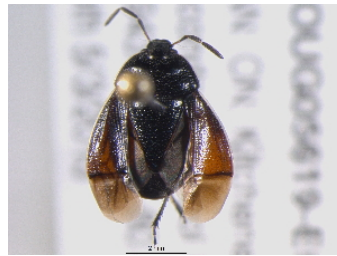

**BIOUG05619-E08 [Dorsal]**  
Cydnidae  
Family: Cydnidae  
BIN URI: BOLD:AAG8897

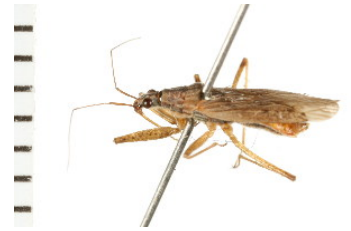

**08BBHEM-247 [Lateral]**  
*Nabis rufusculus*  
Family: Nabidae  
BIN URI: BOLD:AAD1219

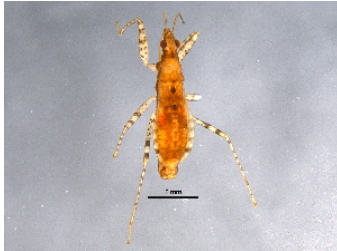

**BIOUG05564-F06 [Dorsal]**  
*Hoplistoscelis sordidus*  
Family: Nabidae  
BIN URI: BOLD:ABV2541

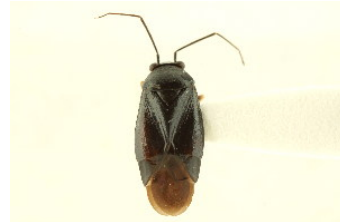

**CNC#PBI00394953 [Dorsal]**  
*Slaterocoris stygicus*  
Family: Miridae  
BIN URI: BOLD:AAF4643

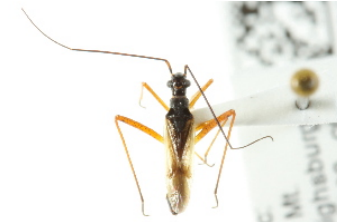

**CNC#PBI00394787 [Dorsal]**  
*Collaria meillerii*  
Family: Miridae  
BIN URI: BOLD:AAG8826

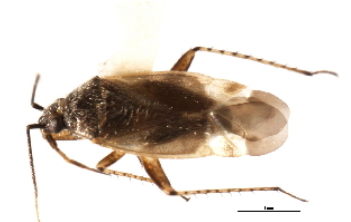

**CNC-HEM-0529 [Dorsal]**  
*Plagiognathus obscurus*  
Family: Miridae  
BIN URI: BOLD:AAB3379

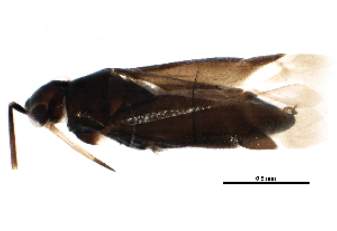

**BIOUG12757-F05 [Lateral]**  
*Chlamydatus associatus*  
Family: Miridae  
BIN URI: BOLD:AAF3365

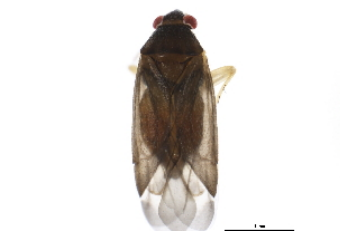

**BIOUG00935-F04 [Dorsal]**  
*Phoenicocoris strobicola*  
Family: Miridae  
BIN URI: BOLD:AAH8507

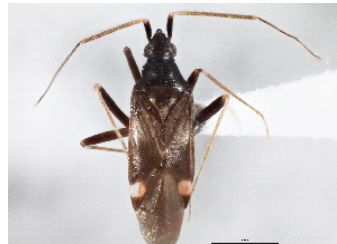

**CCDB-21309-A09 [Dorsal]**  
*Fulvius slateri*  
Family: Miridae  
BIN URI: BOLD:ACB0077

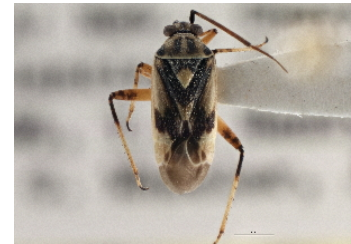

**CCDB-21310-H05 [Dorsal]**  
*Polymerus balli*  
Family: Miridae  
BIN URI: BOLD:AAZ2830

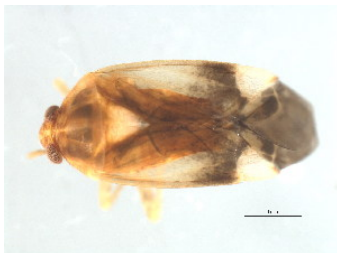

**08BBHEM-407 [Dorsal]**  
*Lygocoris pabulinus*  
Family: Miridae  
BIN URI: BOLD:AAB2216

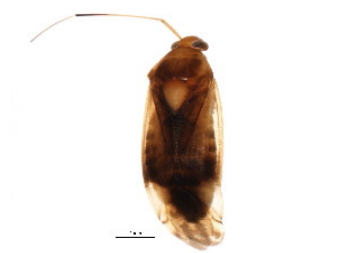

**BIOUG01019-D08 [Dorsal]**  
*Neolygus omnivagus*  
Family: Miridae  
BIN URI: BOLD:AAJ2791

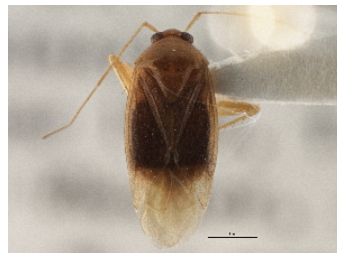

**CCDB-21315-F04 [Dorsal]**  
*Neolygus hirticulus*  
Family: Miridae  
BIN URI: BOLD:ABY1773

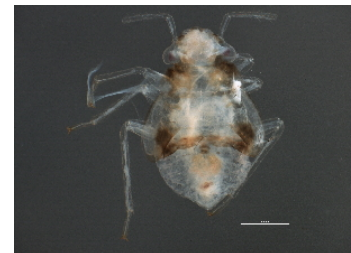

**BIOUG09991-H04 [Dorsal]**  
*Tropidostepes*  
Family: Miridae  
BIN URI: BOLD:ACC0381

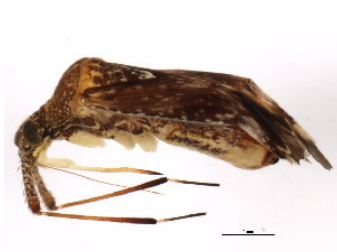

**PCPP10-0643 [Lateral]**  
*Neurocolpus nubilus*  
Family: Miridae  
BIN URI: BOLD:AAH8390

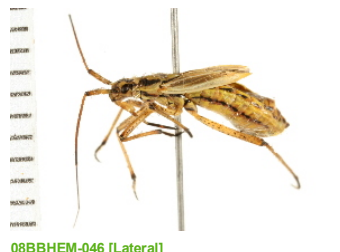

**08BBHEM-046 [Lateral]**  
*Leptopterna dolabrata*  
Family: Miridae  
BIN URI: BOLD:AAB5081

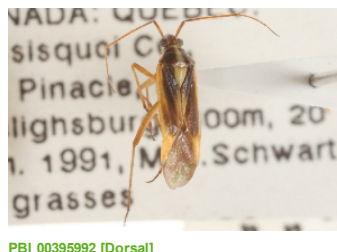

**PBI 00395992 [Dorsal]**  
*Stenotus binotatus*  
Family: Miridae  
BIN URI: BOLD:AAC0635

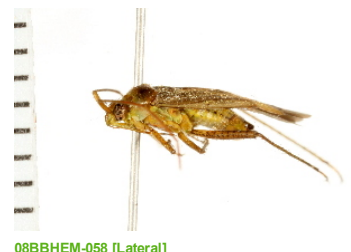

**08BBHEM-058 [Lateral]**  
*Adelphocoris lineolatus*  
Family: Miridae  
BIN URI: BOLD:ACE7444

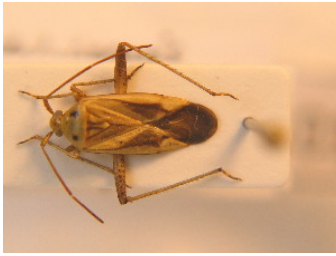

**BFB\_Heteroptera\_Schmolke\_134 [Dorsal]**  
*Adelphocoris lineolatus*  
 Family: Miridae  
 BIN URI: BOLD:ACF1257

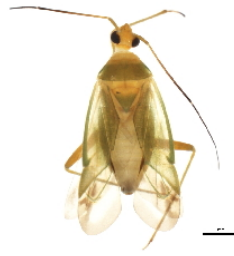

**BIOUG00856-D04 [Dorsal]**  
*Lygocoris pabulinus*  
 Family: Miridae  
 BIN URI: BOLD:AAB2218

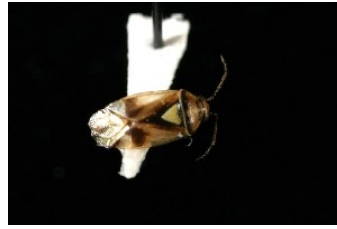

**05-PK-049 [Dorsal]**  
 Hemiptera  
 BIN URI: BOLD:ACE8426

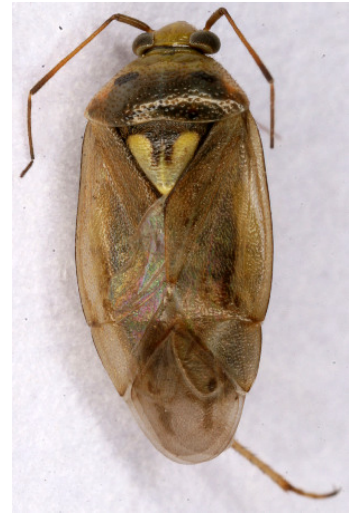

**EUBUG\_704\_f\_Lygurugu6 [Dorsal]**  
*Lygus rugulipennis*  
 Family: Miridae  
 BIN URI: BOLD:ACF4388

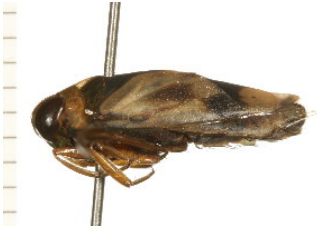

**CNC-HEM-1378 [Lateral]**  
*Notonecta undulata*  
 Family: Notonectidae  
 BIN URI: BOLD:AAI2431

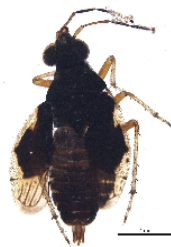

**BIOUG09338-F04 [Dorsal]**  
*Micracanthia*  
 Family: Saldidae  
 BIN URI: BOLD:ACK8299

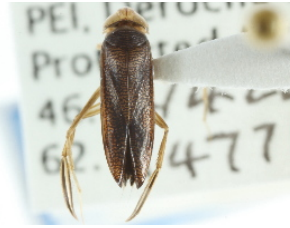

**CNC#HEM300323 [Dorsal]**  
*Palmacorixa buenoi*  
 Family: Corixidae  
 BIN URI: BOLD:AAG8833

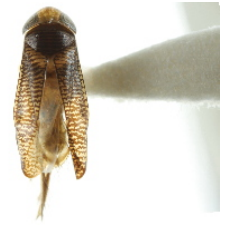

**CNC#HEM302722 [Dorsal]**  
*Trichocorixa sexcincta*  
 Family: Corixidae  
 BIN URI: BOLD:AAH8079

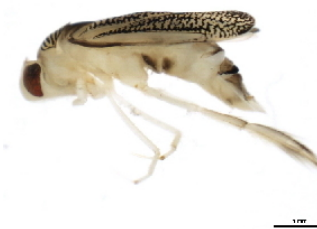

**10BBCHEM-0286 [Lateral]**  
*Trichocorixa borealis*  
 Family: Corixidae  
 BIN URI: BOLD:ACU9590

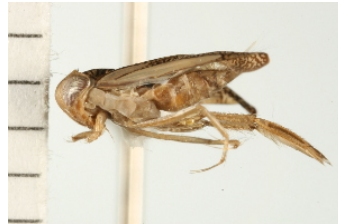

**CNC-HEM-1465 [Lateral]**  
*Trichocorixa borealis*  
 Family: Corixidae  
 BIN URI: BOLD:ABZ4308

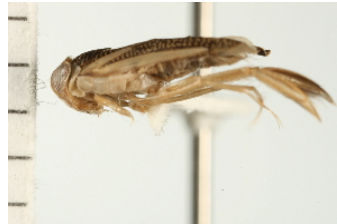

**CNC-HEM-1464 [Lateral]**  
*Trichocorixa borealis*  
 Family: Corixidae  
 BIN URI: BOLD:ACU9591

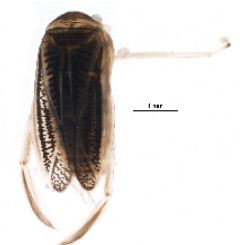

**BIOUG24012-G09 [Dorsal]**  
 Corixidae  
 Family: Corixidae

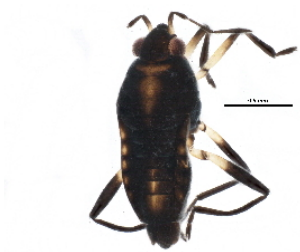

**BIOUG24012-G11 [Dorsal]**  
Gerridae  
Family: Gerridae

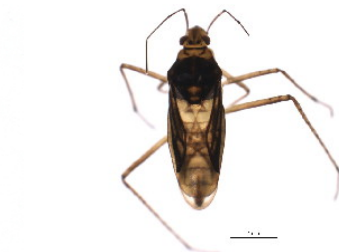

**PCPP10-0598 [Dorsal]**  
Mesovelia  
Family: Mesoveliidae  
BIN URI: BOLD:ACF3552

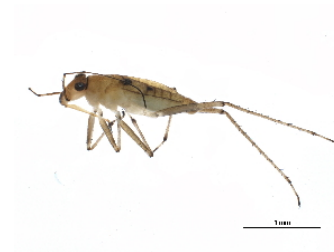

**BIOUG24015-B01 [Lateral]**  
Hemiptera

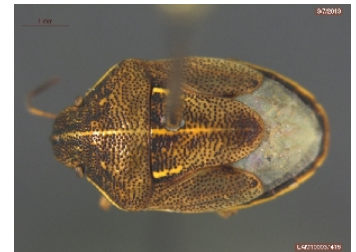

**UAM:Ento:97000 [Dorsal]**  
Neottiglossa undata  
Family: Pentatomidae  
BIN URI: BOLD:AAE1308

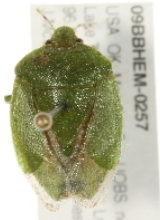

**09BBHEM-0257 [Dorsal]**  
Acrosternum hilare  
Family: Pentatomidae  
BIN URI: BOLD:AAD6352

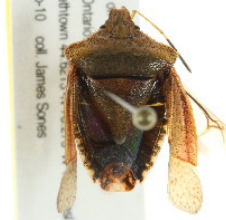

**BIOUG01150-C09 [Dorsal]**  
Euschistus servus  
Family: Pentatomidae  
BIN URI: BOLD:AAE0845

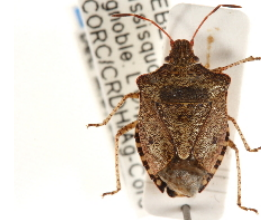

**CNC#HEM305245 [Dorsal]**  
Euschistus tristigmus luridus  
Family: Pentatomidae  
BIN URI: BOLD:AAG1809

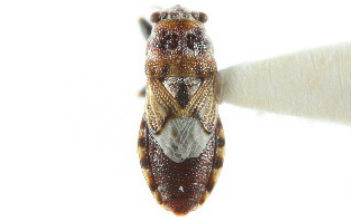

**CNC#HEM303005 [Dorsal]**  
Phegys abbreviatus  
Family: Pachygronthidae  
BIN URI: BOLD:AAW5225

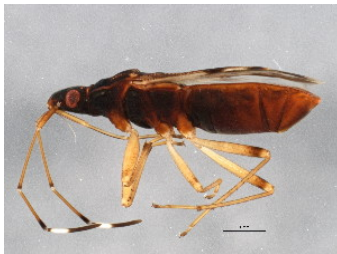

**BIOUG02287-D12 [Lateral]**  
Ozophora sp.  
Family: Rhyparochromidae  
BIN URI: BOLD:ABW7692

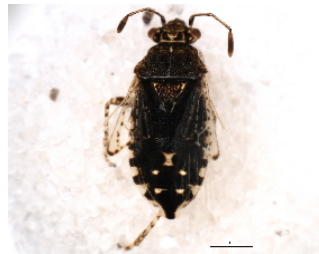

**10BBHEM-297 [Dorsal]**  
Hemiptera  
BIN URI: BOLD:AAJ1753

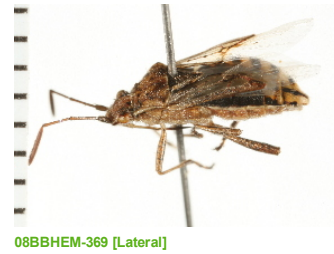

**08BBHEM-369 [Lateral]**  
Stictopleurus punctiventris  
Family: Rhopalidae  
BIN URI: BOLD:AAC0814

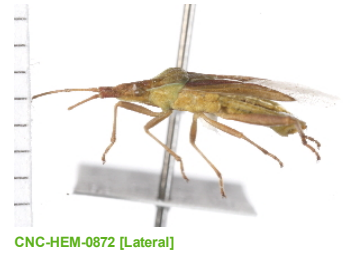

**CNC-HEM-0872 [Lateral]**  
Harmostes reflexulus  
Family: Rhopalidae  
BIN URI: BOLD:AAD0591

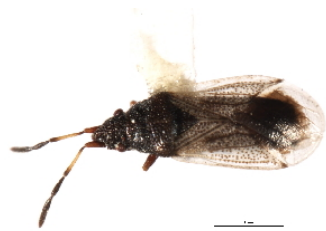

**CNC-HEM-0059 [Dorsal]**  
Crophius disconotus  
Family: Oxycarenidae  
BIN URI: BOLD:AAR4786

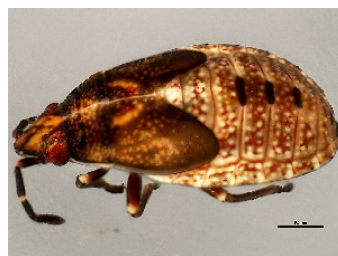

**TDWG-1204 [Dorsal]**  
Hemiptera  
BIN URI: BOLD:ABY8347

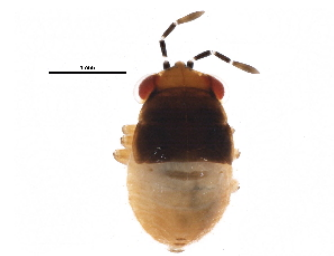

**BIOUG24027-C11 [Dorsal]**  
Hemiptera

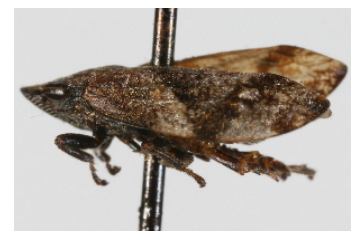

**ENT-OUBS-335 [Lateral]**  
Cercopidae  
Family: Cercopidae  
BIN URI: BOLD:AAG8827

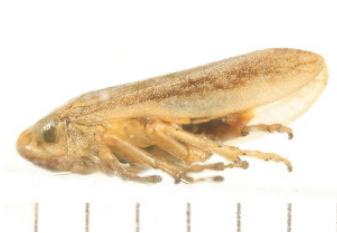

**CNC-HEM-1064 [Lateral]**  
Philaenus spumarius  
Family: Cercopidae  
BIN URI: BOLD:AAB1850

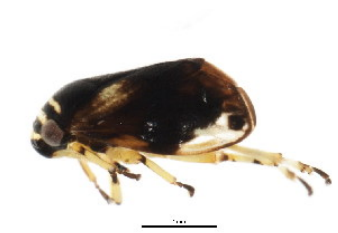

**BIOUG01012-A07 [Lateral]**  
Clastoptera proteus  
Family: Clastopteridae  
BIN URI: BOLD:AAG8734

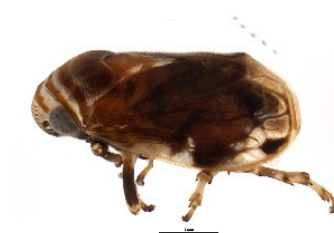

**BIOUG00806-E01 [Lateral]**  
Clastoptera obtusa  
Family: Clastopteridae  
BIN URI: BOLD:AAG8823

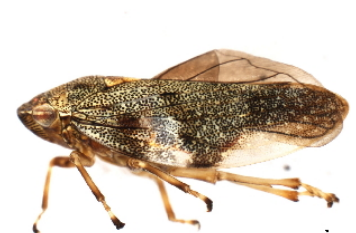

**09BBEHE-194 [Lateral]**  
Aphrophora quadrinotata  
Family: Cercopidae  
BIN URI: BOLD:AAZ2091

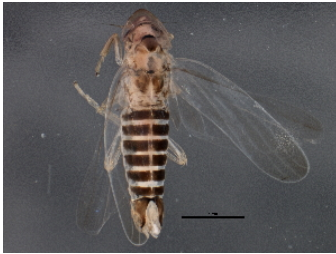

**BIOUG03639-D02 [Dorsal]**  
*Dikraneura mali*  
 Family: Cicadellidae  
 BIN URI: BOLD:ABA5842

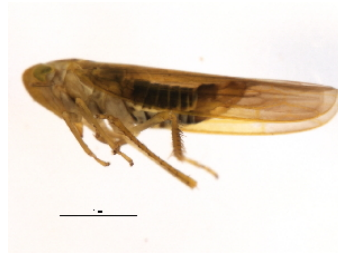

**10BBCHEM-1100 [Lateral]**  
*Forcipata acclina*  
 Family: Cicadellidae  
 BIN URI: BOLD:AA8283

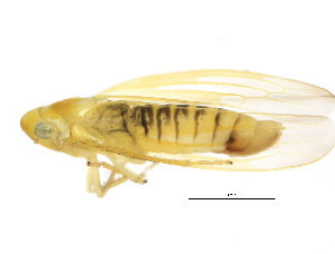

**BIOUG00941-A12 [Lateral]**  
*Forcipata loca*  
 Family: Cicadellidae  
 BIN URI: BOLD:ACC8165

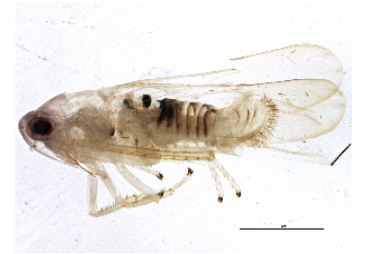

**BIOUG06041-G11 [Lateral]**  
*Empoasca*  
 Family: Cicadellidae  
 BIN URI: BOLD:AAG8683

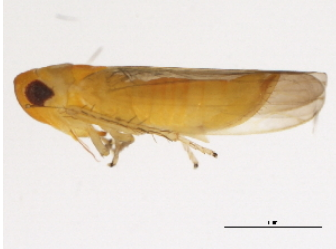

**BIOUG00999-F06 [Lateral]**  
*Empoasca coccinea*  
 Family: Cicadellidae  
 BIN URI: BOLD:ABA5764

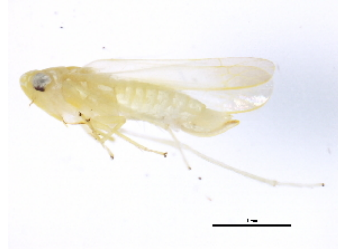

**BIOUG00935-G12 [Lateral]**  
*Empoasca*  
 Family: Cicadellidae  
 BIN URI: BOLD:ABA5771

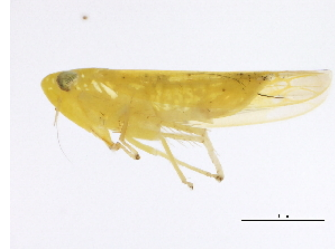

**BIOUG00906-A02 [Lateral]**  
*Empoasca*  
 Family: Cicadellidae  
 BIN URI: BOLD:AAG2873

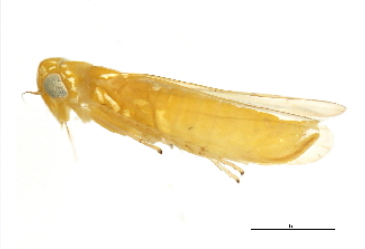

**OT1\_JRE\_234 [Lateral]**  
*Empoasca* sp.  
 Family: Cicadellidae  
 BIN URI: BOLD:AAG2868

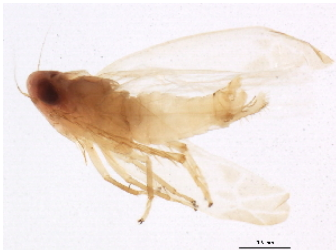

**BIOUG01652-C12 [Lateral]**  
*Empoasca*  
 Family: Cicadellidae  
 BIN URI: BOLD:ABA5807

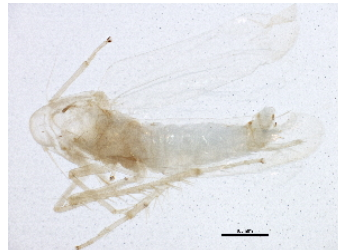

**BIOUG01595-D08 [Dorsal]**  
*Empoasca*  
 Family: Cicadellidae  
 BIN URI: BOLD:AA8337

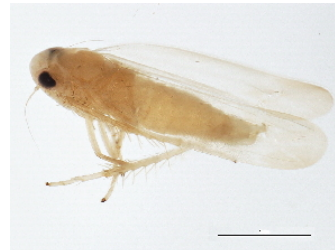

**BIOUG00771-D03 [Lateral]**  
*Empoasca*  
 Family: Cicadellidae  
 BIN URI: BOLD:AA8250

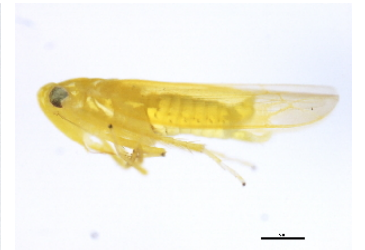

**BIOUG00935-E06 [Lateral]**  
*Empoasca*  
 Family: Cicadellidae  
 BIN URI: BOLD:ACE5873

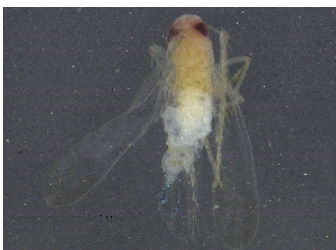

**BIOUG00891-G01 [Dorsal]**  
*Empoasca*  
 Family: Cicadellidae  
 BIN URI: BOLD:ACF5025

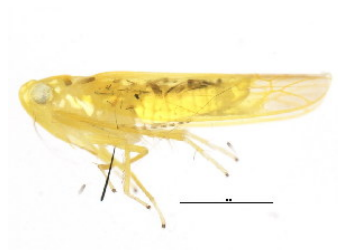

**BIOUG00941-H11 [Lateral]**  
*Empoasca*  
 Family: Cicadellidae  
 BIN URI: BOLD:ABZ4247

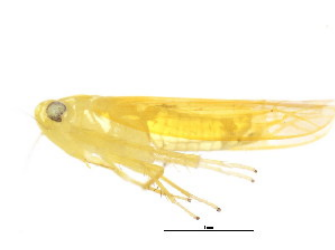

**BIOUG00941-C02 [Lateral]**  
*Empoasca*  
 Family: Cicadellidae  
 BIN URI: BOLD:ACF5026

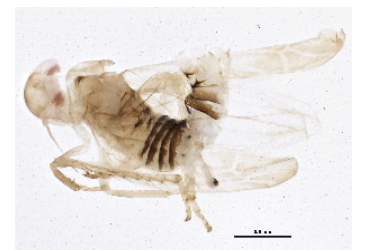

**BIOUG01595-H09 [Lateral]**  
 Cicadellidae  
 Family: Cicadellidae  
 BIN URI: BOLD:ABW2910

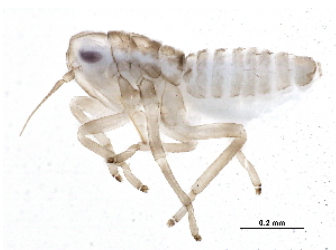

**BIOUG15778-E02 [Lateral]**  
 Typhlocybinae  
 Family: Cicadellidae  
 BIN URI: BOLD:ACQ9086

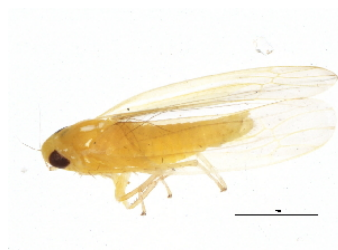

**BIOUG00771-A11 [Lateral]**  
*Empoasca decipiens*  
 Family: Cicadellidae  
 BIN URI: BOLD:AAY6741

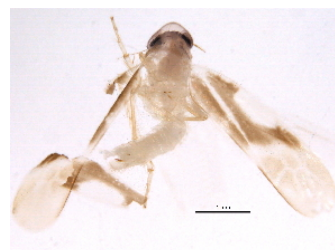

**BIOUG03055-B03 [Dorsal]**  
*Empoasca*  
 Family: Cicadellidae  
 BIN URI: BOLD:ABA5875

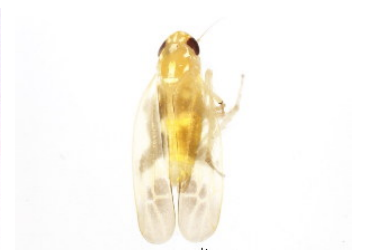

**BIOUG00941-E01 [Dorsal]**  
*Empoasca*  
 Family: Cicadellidae  
 BIN URI: BOLD:AAV0166

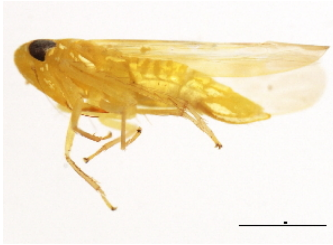

**BIOUG00552-B02 [Lateral]**  
 Empoasca  
 Family: Cicadellidae  
 BIN URI: BOLD:AAV0165

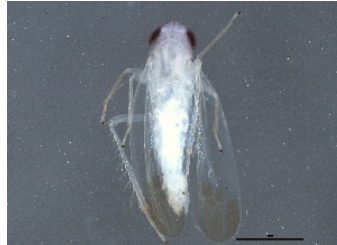

**BIOUG05545-F05 [Dorsal]**  
 Empoasca  
 Family: Cicadellidae  
 BIN URI: BOLD: AAN8289

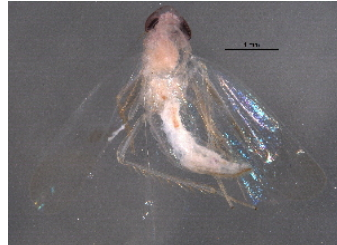

**BIOUG09357-H06 [Dorsal]**  
 Empoasca  
 Family: Cicadellidae  
 BIN URI: BOLD: ACL2611

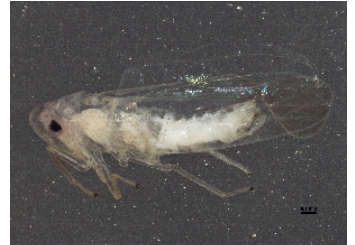

**BIOUG03564-F01 [Lateral]**  
 Empoasca  
 Family: Cicadellidae  
 BIN URI: BOLD: AAV0159

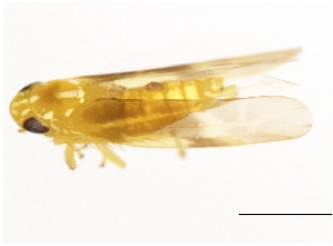

**BIOUG00552-D12 [Lateral]**  
 Empoasca  
 Family: Cicadellidae  
 BIN URI: BOLD: AAG8850

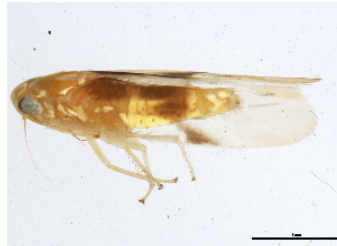

**BIOUG00771-B03 [Lateral]**  
 Empoasca  
 Family: Cicadellidae  
 BIN URI: BOLD: AAY6736

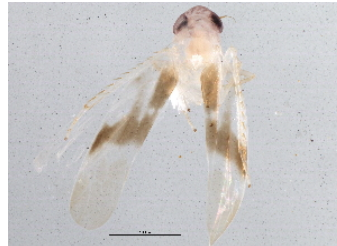

**BIOUG09690-H09 [Dorsal]**  
 Empoasca  
 Family: Cicadellidae  
 BIN URI: BOLD: ACC8521

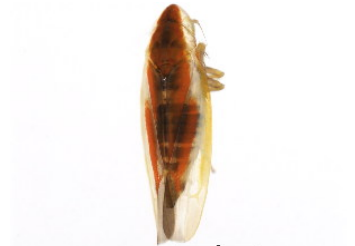

**BIOUG00941-H07 [Dorsal]**  
 Erythrulida wysongi  
 Family: Cicadellidae  
 BIN URI: BOLD: AAN8287

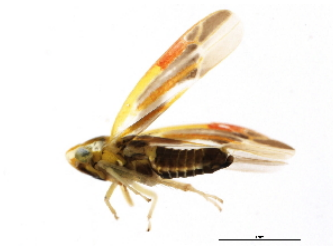

**BIOUG00552-H06 [Lateral]**  
 Arboridia bitincta  
 Family: Cicadellidae  
 BIN URI: BOLD: ABA5831

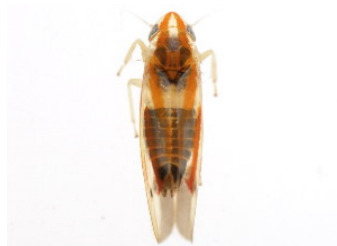

**BIOUG00917-A08 [Dorsal]**  
 Erythrulida wysongi  
 Family: Cicadellidae  
 BIN URI: BOLD: ABZ1306

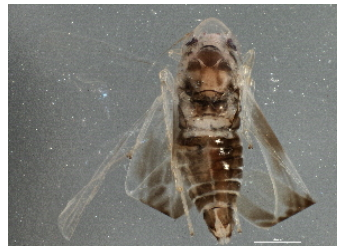

**BIOUG05017-C10 [Dorsal]**  
 Erythrulida  
 Family: Cicadellidae  
 BIN URI: BOLD: ACE0635

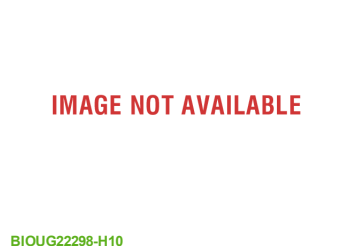

**IMAGE NOT AVAILABLE**

**BIOUG22298-H10**  
 Erythrulida wysongi  
 Family: Cicadellidae

**IMAGE NOT AVAILABLE**

**BIOUG22082-B09**  
 Erythrulida  
 Family: Cicadellidae

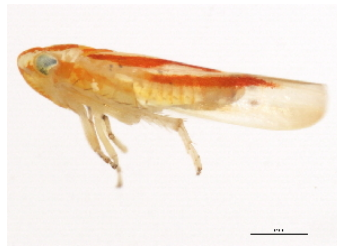

**BIOUG00552-D02 [Lateral]**  
 Erythrulida  
 Family: Cicadellidae  
 BIN URI: BOLD: ACL3048

**IMAGE NOT AVAILABLE**

**BIOUG22297-G11**  
 Erythrulida  
 Family: Cicadellidae

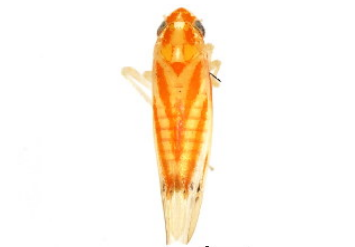

**BIOUG00917-B01 [Dorsal]**  
 Erythrulida tenuispica  
 Family: Cicadellidae  
 BIN URI: BOLD: ABA5830

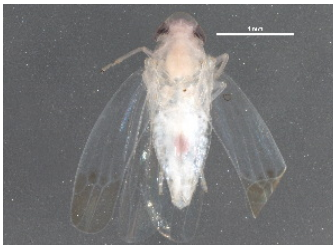

**BIOUG21768-D03 [Dorsal]**  
 Erythrulida  
 Family: Cicadellidae  
 BIN URI: BOLD: ACV2335

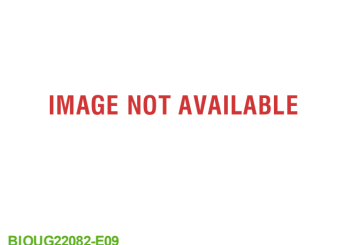

**IMAGE NOT AVAILABLE**

**BIOUG22082-E09**  
 Erythrulida  
 Family: Cicadellidae

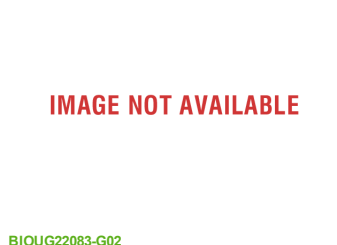

**IMAGE NOT AVAILABLE**

**BIOUG22083-G02**  
 Erythrulida scytha  
 Family: Cicadellidae

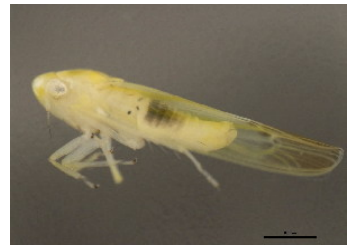

**TDWG-1159 [Lateral]**  
 Erythrulida scytha  
 Family: Cicadellidae  
 BIN URI: BOLD: AAN8412

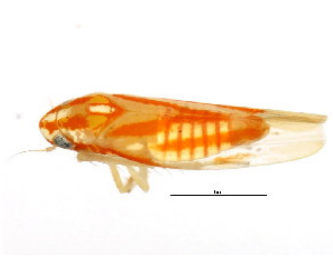

**BIOUG00917-B02 [Dorsal]**  
*Erythrulida dunni*  
Family: Cicadellidae  
BIN URI: BOLD:ABA5786

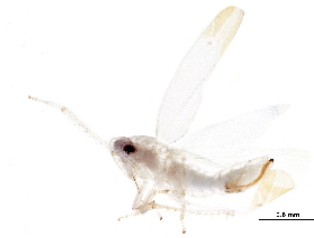

**BIOUG20490-A06 [Lateral]**  
Hemiptera  
BIN URI: BOLD:ACU6504

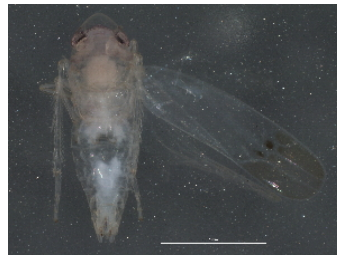

**BIOUG02602-B02 [Dorsal]**  
*Erythrulida*  
Family: Cicadellidae  
BIN URI: BOLD:ABW7654

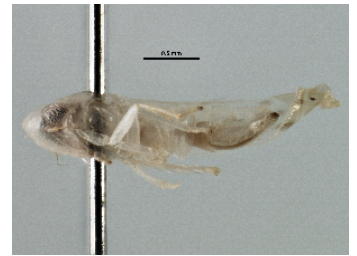

**BIOUG02602-A03 [Lateral]**  
*Erythrulida*  
Family: Cicadellidae  
BIN URI: BOLD:ABX9019

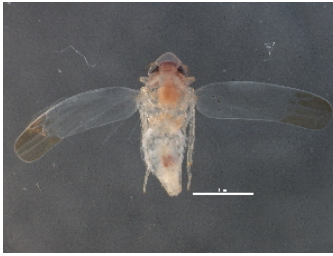

**BIOUG08453-A04 [Dorsal]**  
*Erythrulida*  
Family: Cicadellidae  
BIN URI: BOLD:ACK3871

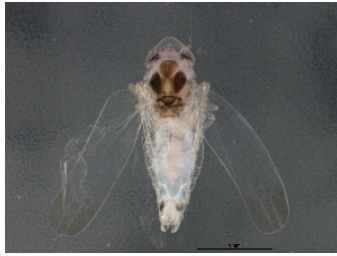

**BIOUG03637-C03 [Dorsal]**  
*Erythrulida*  
Family: Cicadellidae  
BIN URI: BOLD:ACD3877

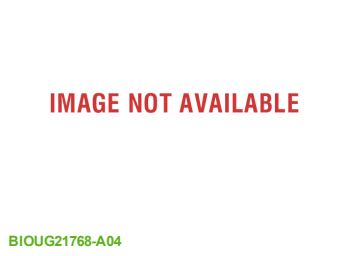

**BIOUG21768-A04**  
*Erythrulida*  
Family: Cicadellidae

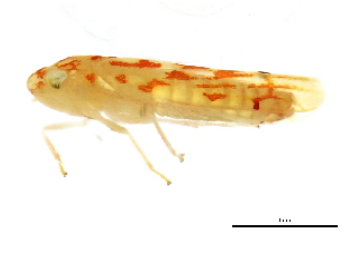

**BIOUG00947-B10 [Lateral]**  
*Eratoneura flexibilis*  
Family: Cicadellidae  
BIN URI: BOLD:AAZ8495

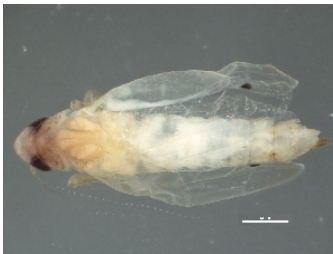

**BIOUG01297-B04 [Dorsal]**  
*Eratoneura flexibilis*  
Family: Cicadellidae  
BIN URI: BOLD:AAZ8496

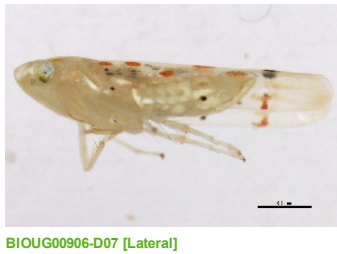

**BIOUG00906-D07 [Lateral]**  
Hemiptera  
BIN URI: BOLD:ABA5797

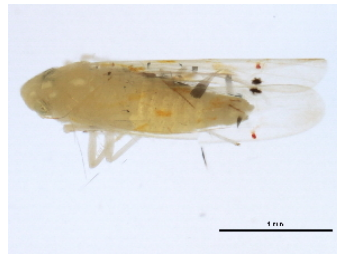

**BIOUG00947-A02 [Lateral]**  
*Erythroneura certa*  
Family: Cicadellidae  
BIN URI: BOLD:ABA5787

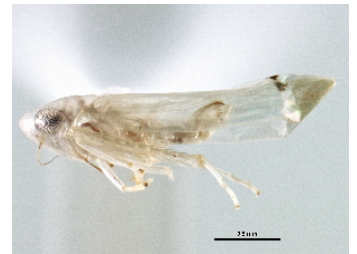

**BIOUG02994-E06 [Lateral]**  
*Eratoneura*  
Family: Cicadellidae  
BIN URI: BOLD:ABV2644

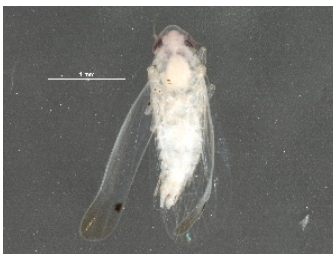

**BIOUG22083-G12 [Dorsal]**  
*Eratoneura*  
Family: Cicadellidae  
BIN URI: BOLD:ACV5228

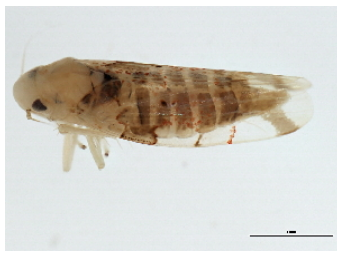

**BIOUG00856-A10 [Lateral]**  
*Hymetta balteata*  
Family: Cicadellidae  
BIN URI: BOLD:AAV0157

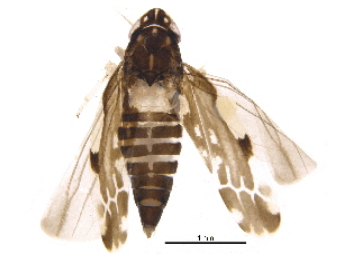

**BIOUG22297-D06 [Dorsal]**  
*Erythroneura*  
Family: Cicadellidae  
BIN URI: BOLD:ABY0554

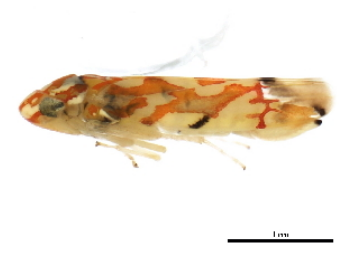

**BIOUG00947-E02 [Lateral]**  
*Erythroneura bakeri*  
Family: Cicadellidae  
BIN URI: BOLD:AAV0161

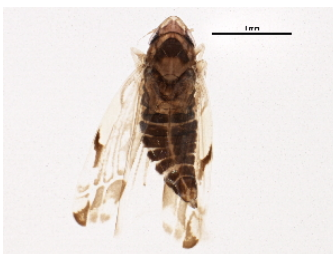

**BIOUG05606-F10 [Dorsal]**  
*Erythroneura vulnerata*  
Family: Cicadellidae  
BIN URI: BOLD:AAV6752

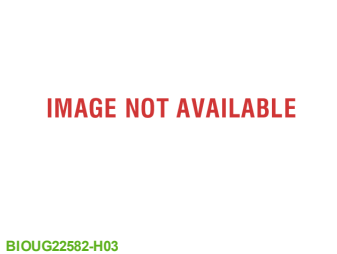

**BIOUG22582-H03**  
*Erythroneura vulnerata*  
Family: Cicadellidae

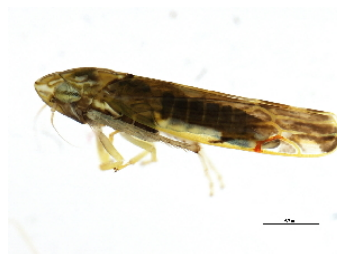

**PCPP10-0567 [Lateral]**  
*Erythroneura vulnerata*  
Family: Cicadellidae  
BIN URI: BOLD:AAO8361

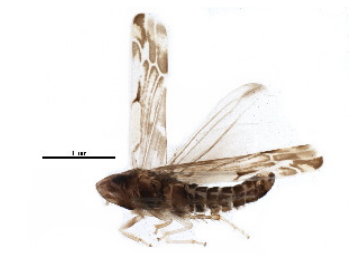

**BIOUG21768-D01 [Lateral]**  
*Erythroneura vulnerata*  
Family: Cicadellidae  
BIN URI: BOLD:ABY9043

IMAGE NOT AVAILABLE

IMAGE NOT AVAILABLE

IMAGE NOT AVAILABLE

IMAGE NOT AVAILABLE

BIOUG21777-D09  
Erythroneura vulnerata  
Family: Cicadellidae

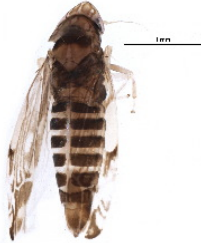

BIOUG21568-E12  
Erythroneura vulnerata  
Family: Cicadellidae

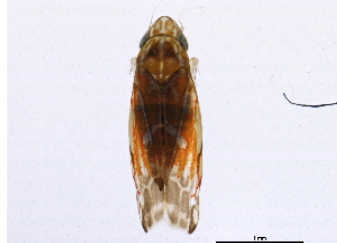

BIOUG22082-A08  
Erythroneura vulnerata  
Family: Cicadellidae

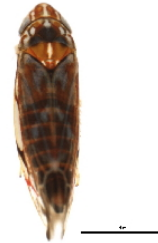

BIOUG22082-A04  
Erythroneura vulnerata  
Family: Cicadellidae

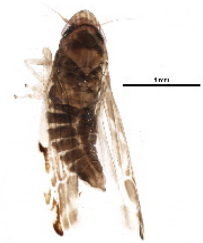

BIOUG21568-B12 [Dorsal]  
Erythroneura vulnerata  
Family: Cicadellidae  
BIN URI: BOLD:ACV2885

BIOUG01236-B09 [Dorsal]  
Hemiptera  
BIN URI: BOLD:ABA5772

BIOUG00906-G11 [Dorsal]  
Erythroneura vulnerata  
Family: Cicadellidae  
BIN URI: BOLD:ACQ3943

BIOUG21568-G04 [Dorsal]  
Erythroneura vulnerata  
Family: Cicadellidae  
BIN URI: BOLD:ACV2886

IMAGE NOT AVAILABLE

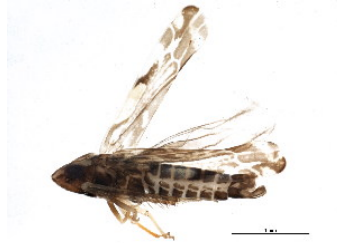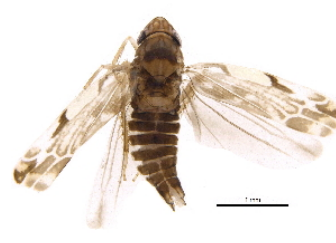

IMAGE NOT AVAILABLE

BIOUG21568-G07  
Erythroneura vulnerata  
Family: Cicadellidae

BIOUG01293-G07 [Dorsal]  
Erythroneura vulnerata  
Family: Cicadellidae  
BIN URI: BOLD:ABY9046

BIOUG22297-H10 [Dorsal]  
Erythroneura vulnerata  
Family: Cicadellidae  
BIN URI: BOLD:ACV2800

BIOUG22574-D02  
Erythroneura  
Family: Cicadellidae

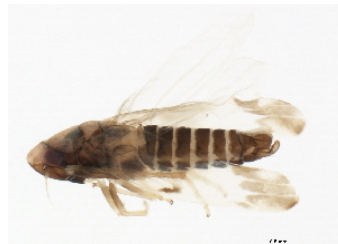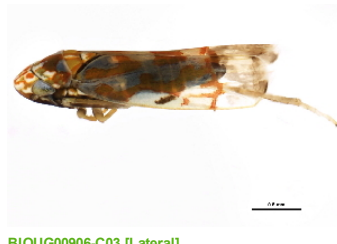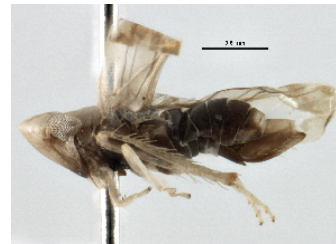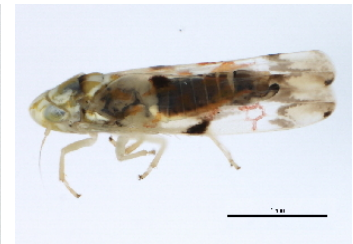

BIOUG01652-C01 [Lateral]  
Erythroneura ontari  
Family: Cicadellidae  
BIN URI: BOLD:ABA5810

BIOUG00906-C03 [Lateral]  
Erythroneura rubrella  
Family: Cicadellidae  
BIN URI: BOLD:AAV0164

BIOUG02966-D03 [Lateral]  
Erythroneura rubrella  
Family: Cicadellidae  
BIN URI: BOLD:ACC8414

BIOUG00935-C08 [Lateral]  
Erythroneura aza  
Family: Cicadellidae  
BIN URI: BOLD:AAV6747

IMAGE NOT AVAILABLE

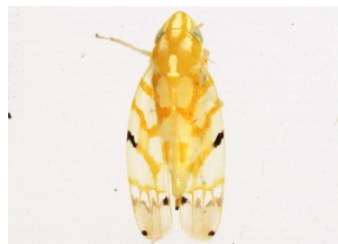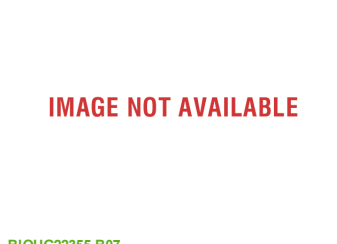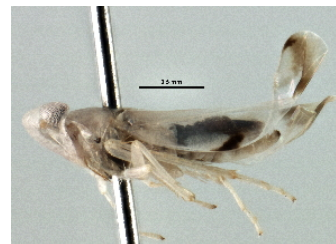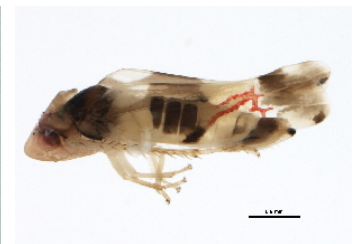

BIOUG00999-C04 [Dorsal]  
Erythroneura  
Family: Cicadellidae  
BIN URI: BOLD:ABA5864

BIOUG22355-B07  
Erythroneura  
Family: Cicadellidae

BIOUG02986-E08 [Lateral]  
Erythroneura  
Family: Cicadellidae  
BIN URI: BOLD:AAZ0166

BIOUG01308-A04 [Lateral]  
Erythroneura  
Family: Cicadellidae  
BIN URI: BOLD:ABZ2507



IMAGE NOT AVAILABLE

BIOUG22355-F02  
*Erythroneura elegans*  
Family: Cicadellidae

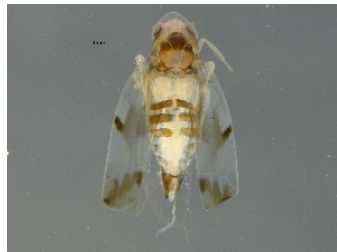

BIOUG02944-G12 [Dorsal]  
*Erythroneura elegans*  
Family: Cicadellidae  
BIN URI: BOLD:ABA5798

IMAGE NOT AVAILABLE

BIOUG21777-B09  
*Erythroneura vitifex*  
Family: Cicadellidae

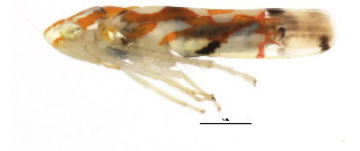

BIOUG00941-B07 [Lateral]  
*Erythroneura vitifex*  
Family: Cicadellidae  
BIN URI: BOLD:AAy6742

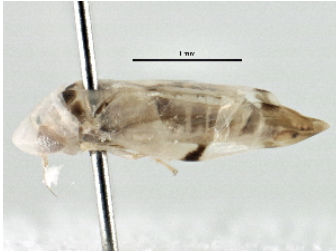

BIOUG02716-D02 [Lateral]  
*Erythroneura vitifex*  
Family: Cicadellidae  
BIN URI: BOLD:ACQ8506

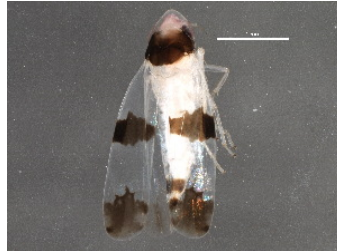

BIOUG22355-G09 [Dorsal]  
*Erythroneura*  
Family: Cicadellidae  
BIN URI: BOLD:ACV5324

IMAGE NOT AVAILABLE

BIOUG22355-B05  
*Erythroneura tricincta*  
Family: Cicadellidae

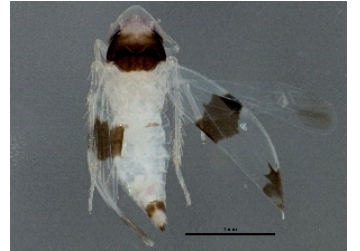

BIOUG05510-B02 [Dorsal]  
*Erythroneura tricincta*  
Family: Cicadellidae  
BIN URI: BOLD:AAy6751

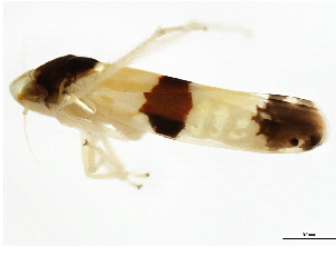

BIOUG00856-E08 [Lateral]  
*Erythroneura tricincta*  
Family: Cicadellidae  
BIN URI: BOLD:AAy6738

IMAGE NOT AVAILABLE

BIOUG21768-A10  
*Erythroneura tricincta*  
Family: Cicadellidae

IMAGE NOT AVAILABLE

BIOUG21768-G11  
*Erythroneura*  
Family: Cicadellidae

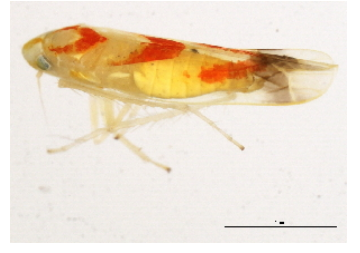

BIOUG00552-D06 [Lateral]  
*Dikrella*  
Family: Cicadellidae  
BIN URI: BOLD:AAV0168

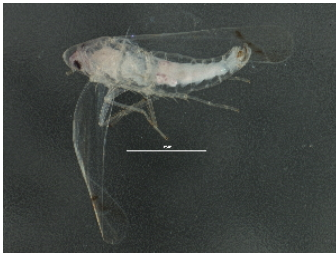

BIOUG02829-F01 [Lateral]  
*Dikrella cruentata*  
Family: Cicadellidae  
BIN URI: BOLD:AAV0158

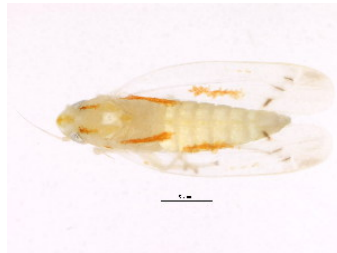

BIOUG00806-C01 [Lateral]  
*Dikrella*  
Family: Cicadellidae  
BIN URI: BOLD:ABX7281

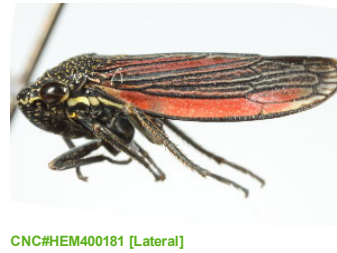

CNC#HEM400181 [Lateral]  
*Cuema striata*  
Family: Cicadellidae  
BIN URI: BOLD:AAG2877

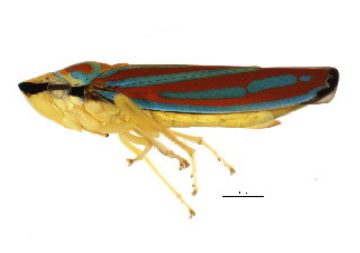

BIOUG00901-G06 [Lateral]  
*Graphocephala fennahi*  
Family: Cicadellidae  
BIN URI: BOLD:AAG2909

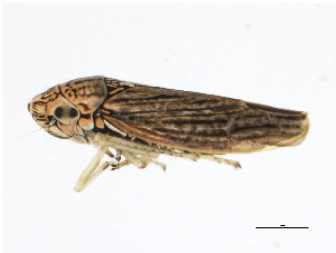

10BBCHEM-1231 [Lateral]  
*Neokolla hieroglyphica*  
Family: Cicadellidae  
BIN URI: BOLD:AAAN8418

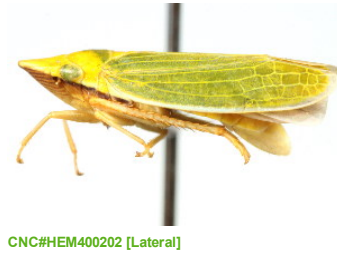

CNC#HEM400202 [Lateral]  
*Draeculacephala antica*  
Family: Cicadellidae  
BIN URI: BOLD:ACE9696

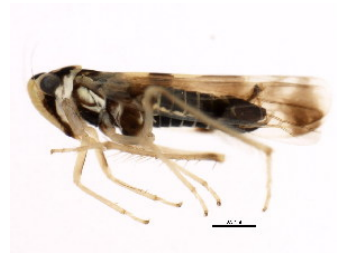

BIOUG00806-H01 [Lateral]  
*Eupteryx atropunctata*  
Family: Cicadellidae  
BIN URI: BOLD:AAG2869

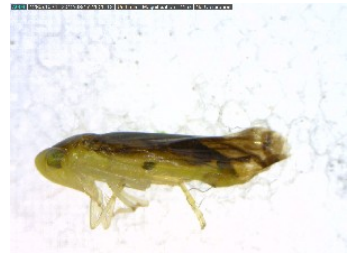

BIOUG02608-D05 [Lateral]  
*Eupteryx flavoscuta*  
Family: Cicadellidae  
BIN URI: BOLD:ABA5805

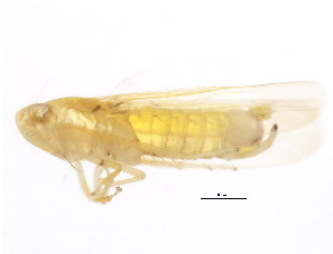

**BIOUG00941-C11 [Lateral]**  
*Typhlocyba niobe*  
 Family: Cicadellidae  
 BIN URI: BOLD:ABA5877

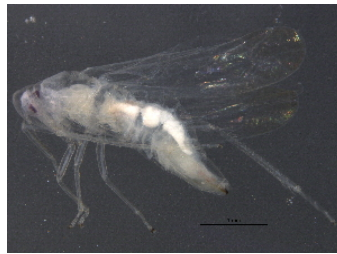

**BIOUG06799-F05 [Lateral]**  
*Typhlocybinae*  
 Family: Cicadellidae  
 BIN URI: BOLD:ACH1957

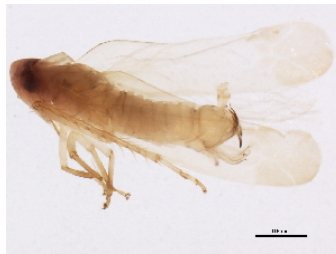

**BIOUG01663-A12 [Lateral]**  
*Typhlocyba pomaria*  
 Family: Cicadellidae  
 BIN URI: BOLD:AAF5980

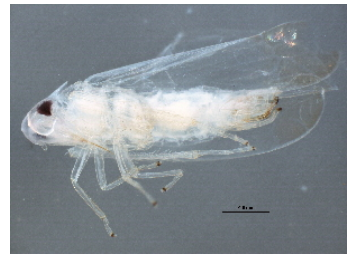

**BIOUG05847-H05 [Lateral]**  
*Typhlocyba hockingensis*  
 Family: Cicadellidae  
 BIN URI: BOLD:ACV8488

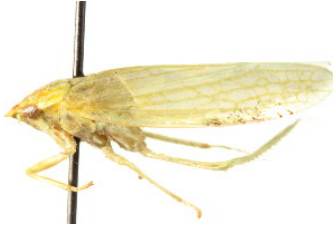

**CNC#HEM400764 [Lateral]**  
*Gyponana praelonga*  
 Family: Cicadellidae  
 BIN URI: BOLD:AAG2878

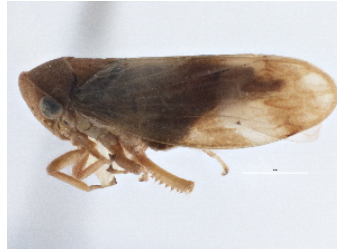

**CNC#HEM305539 [Lateral]**  
*Macropsis basalis*  
 Family: Cicadellidae  
 BIN URI: BOLD:ACC9200

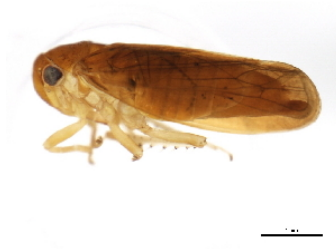

**BIOUG00943-A02 [Lateral]**  
*Oncopsis sobria*  
 Family: Cicadellidae  
 BIN URI: BOLD:ACI7197

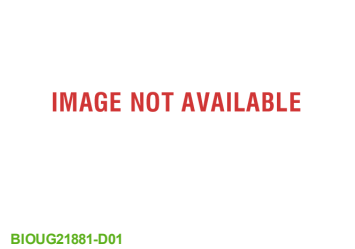

**IMAGE NOT AVAILABLE**

**BIOUG21881-D01**  
*Oncopsis*  
 Family: Cicadellidae

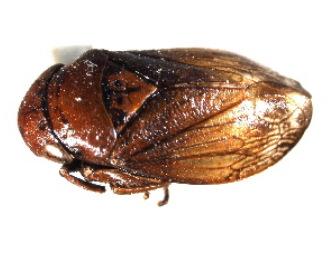

**CNC#HEM405041 [Lateral]**  
*Penthimia americana*  
 Family: Cicadellidae  
 BIN URI: BOLD:ABW7659

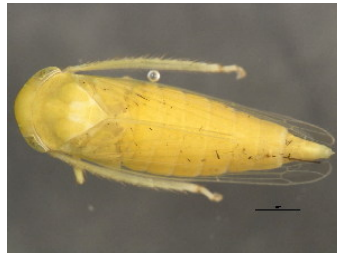

**10BBCHEM-1039 [Dorsal]**  
*Chlorotettix*  
 Family: Cicadellidae  
 BIN URI: BOLD:AAG2891

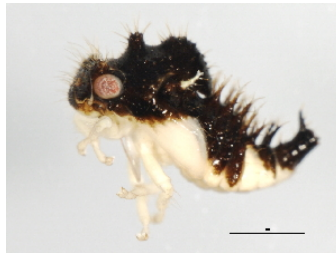

**09BBEHE-086 [Lateral]**  
*Pubilia concava*  
 Family: Membracidae  
 BIN URI: BOLD:AAD6344

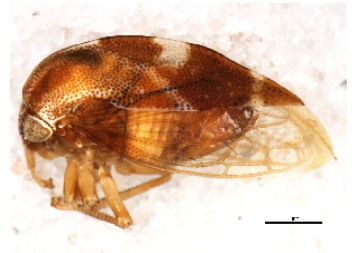

**09BBEHE-204 [Lateral]**  
*Cyrtolobus*  
 Family: Membracidae  
 BIN URI: BOLD:AAN8383

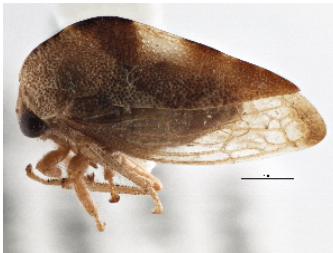

**CCDB-21318-G08 [Lateral]**  
*Cyrtolobus vau*  
 Family: Membracidae  
 BIN URI: BOLD:AAN8263

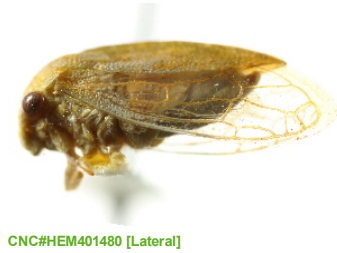

**CNC#HEM401480 [Lateral]**  
*Atymna helena*  
 Family: Membracidae  
 BIN URI: BOLD:AA9905

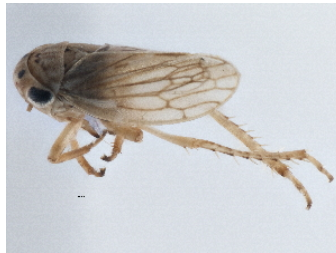

**CNC#HEM305528 [Lateral]**  
*Ceratagallia viator*  
 Family: Cicadellidae  
 BIN URI: BOLD:AAG2875

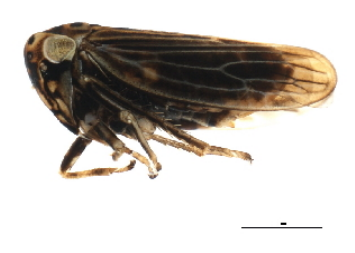

**BIOUG00552-H08 [Lateral]**  
*Agallia quadripunctata*  
 Family: Cicadellidae  
 BIN URI: BOLD:AAG2899

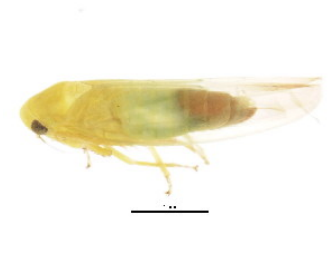

**BIOUG01012-E05 [Lateral]**  
*Balclutha*  
 Family: Cicadellidae  
 BIN URI: BOLD:AA96737

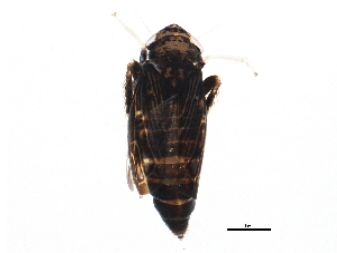

**BIOUG06984-G02 [Dorsal]**  
*Limotettix*  
 Family: Cicadellidae  
 BIN URI: BOLD:ACJ8795

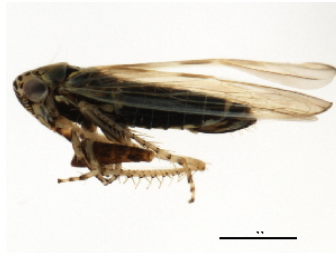

**BIOUG00937-B09 [Lateral]**  
*Macrosteles quadrilineatus*  
 Family: Cicadellidae  
 BIN URI: BOLD:AAA9422

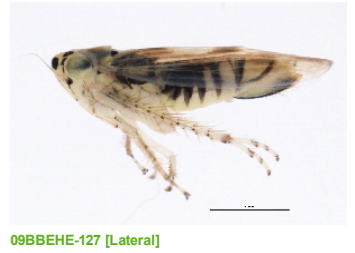

**09BBEHE-127 [Lateral]**  
*Macrosteles variatus*  
 Family: Cicadellidae  
 BIN URI: BOLD:AAV0236

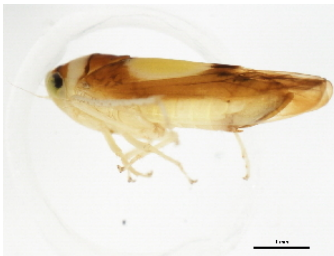

**BIOUG00937-D08 [Lateral]**  
*Colladonus clitellarius*  
Family: Cicadellidae  
BIN URI: BOLD:AAG2885

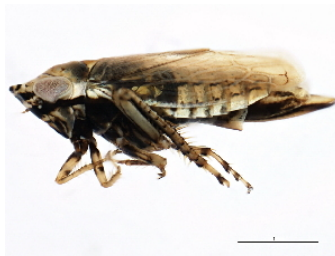

**10BBCHEM-0358 [Lateral]**  
*Doratura stylata*  
Family: Cicadellidae  
BIN URI: BOLD:AAG8821

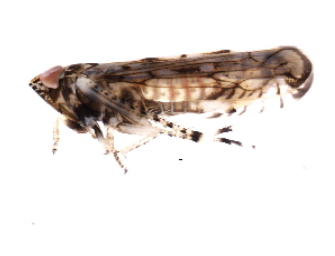

**09BBEHE-151 [Lateral]**  
*Scaphoideus*  
Family: Cicadellidae  
BIN URI: BOLD:AAG8981

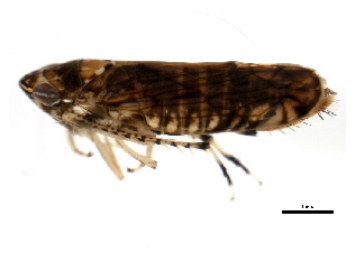

**BIOUG00943-F12 [Lateral]**  
*Scaphoideus major*  
Family: Cicadellidae  
BIN URI: BOLD:AAV6734

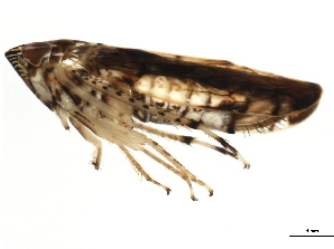

**BIOUG00856-E01 [Lateral]**  
*Scaphoideus*  
Family: Cicadellidae  
BIN URI: BOLD:AAV9211

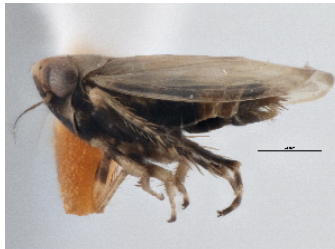

**CNC#HEM305697 [Lateral]**  
*Limotettix humidus*  
Family: Cicadellidae  
BIN URI: BOLD:AAV8918

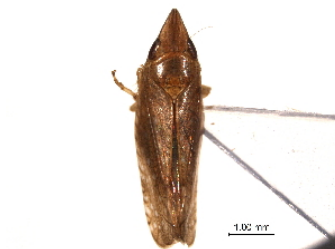

**CNC#HEM405203 [Dorsal]**  
*Scaphytopius latus*  
Family: Cicadellidae  
BIN URI: BOLD:AAG8842

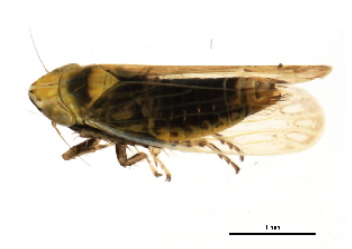

**BIOUG00999-C06 [Lateral]**  
*Sorhoanus pascuellus*  
Family: Cicadellidae  
BIN URI: BOLD:ABV2554

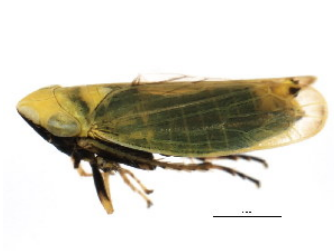

**BIOUG01000-A07 [Lateral]**  
*Diplocolenus abdominalis*  
Family: Cicadellidae  
BIN URI: BOLD:AAG2897

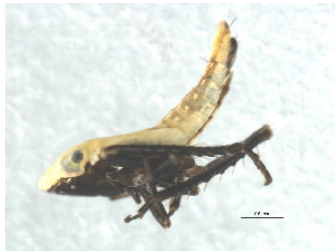

**08BBHEM-417 [Lateral]**  
*Diplocolenus*  
Family: Cicadellidae  
BIN URI: BOLD:AAG2900

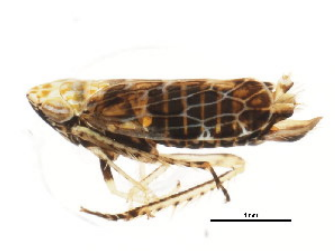

**BIOUG01012-E07 [Lateral]**  
*Errastunus ocellaris*  
Family: Cicadellidae  
BIN URI: BOLD:AAG8839

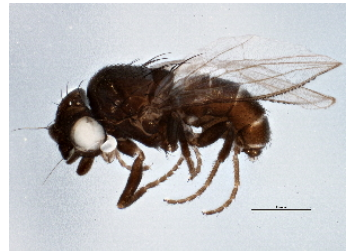

**BIOUG04880-B06 [Lateral]**  
Milichidae  
Family: Milichidae  
BIN URI: BOLD:ACF6749

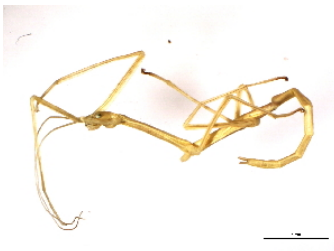

**BIOUG00863-A12 [Lateral]**  
*Diapheromera femorata*  
Family: Heteronemiidae  
BIN URI: BOLD:AAW5365

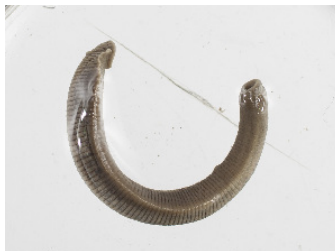

**CCDB-22802 D05 [Lateral]**  
Clitellata  
BIN URI: BOLD:ACR1438

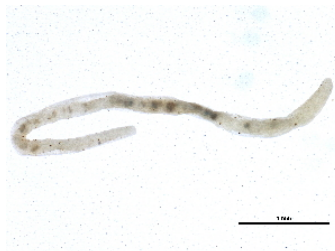

**SCCWRP0264001 [Lateral]**  
Enchytraeidae  
Family: Enchytraeidae  
BIN URI: BOLD:AAT8916

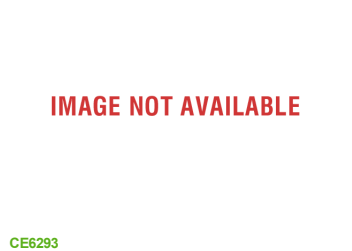

**CE6293**  
*Enchytraeus* sp.  
Family: Enchytraeidae  
BIN URI: BOLD:AAU1183

IMAGE NOT AVAILABLE

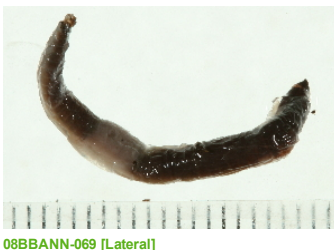

**08BBANN-069 [Lateral]**  
*Dendrobaena octaedra*  
Family: Lumbricidae  
BIN URI: BOLD:ABX6545

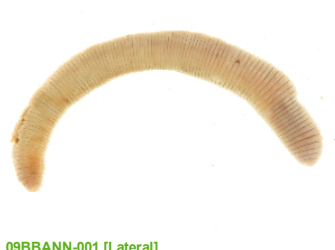

**09BBANN-001 [Lateral]**  
*Dendrodrilus rubidus*  
Family: Lumbricidae  
BIN URI: BOLD:AAA7664

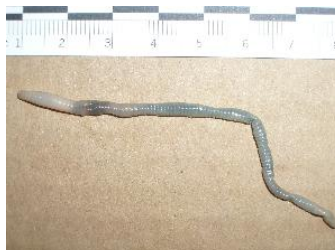

**EW-CA-164 []**  
*Octolasion tyrtaeum*  
Family: Lumbricidae  
BIN URI: BOLD:ACF5848

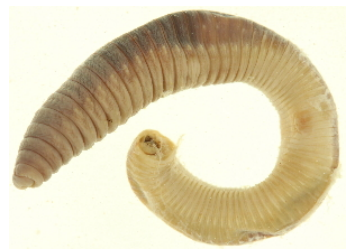

**CE4366 [Lateral]**  
*Lumbricus terrestris*  
Family: Lumbricidae  
BIN URI: BOLD:ABZ1950

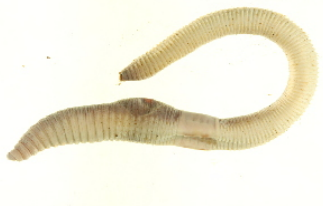

IMAGE NOT AVAILABLE

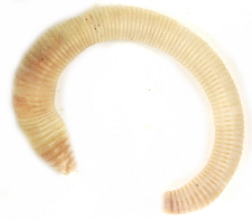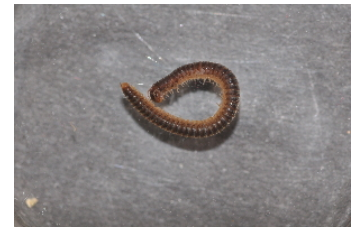

**CE7111 [Lateral]**  
*Lumbricus rubellus*  
Family: Lumbricidae  
BIN URI: BOLD:ACE9910

**BIOUG24014-A12**  
*Lumbricus*  
Family: Lumbricidae

**BIOUG24014-B01 [Lateral]**  
Aporectodea  
Family: Lumbricidae

**BC ZSM MYR 00156 [Lateral]**  
*Ophiulus pilosus*  
Family: Julidae  
BIN URI: BOLD:AAH7470

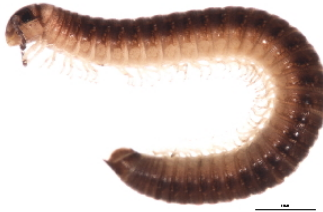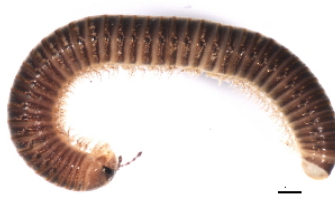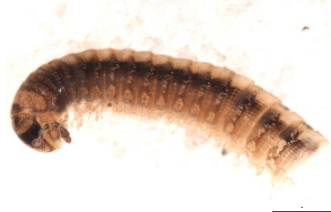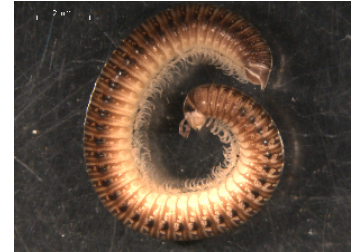

**MYRAB-010 [Lateral]**  
*Julus scandinavicus*  
Family: Julidae  
BIN URI: BOLD:AAH7469

**MYRAB-003 [Lateral]**  
*Cylindroiulus caeruleocinctus*  
Family: Julidae  
BIN URI: BOLD:AAH7472

**09BBMYR-083 [Lateral]**  
*Brachyiulus pusillus*  
Family: Julidae  
BIN URI: BOLD:AAM7944

**GAB-ONT-009 [Dorsolateral]**  
Julidae  
Family: Julidae  
BIN URI: BOLD:AAH7468

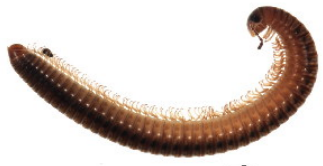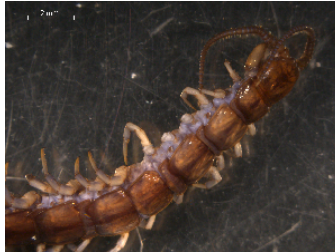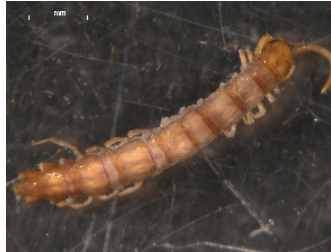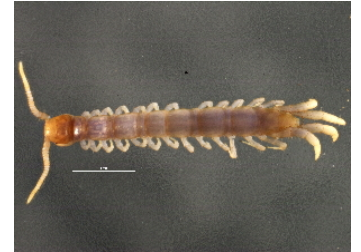

**BIOUG00880-G02 [Lateral]**  
Julidae  
Family: Julidae  
BIN URI: BOLD:AAZ5766

**GAB-ONT-006 [Dorsal]**  
*Lithobius*  
Family: Lithobiidae  
BIN URI: BOLD:AAI1133

**GAB-ONT-018 [Dorsal]**  
*Lithobius*  
Family: Lithobiidae  
BIN URI: BOLD:AAI1134

**BIOUG08056-G10 [Dorsal]**  
*Lithobius*  
Family: Lithobiidae  
BIN URI: BOLD:AAH6432

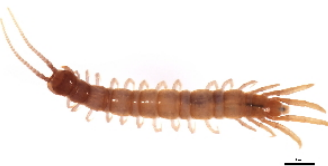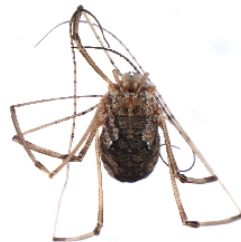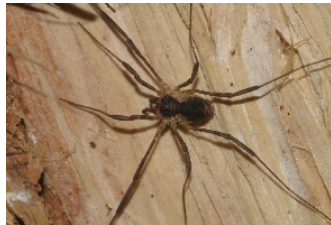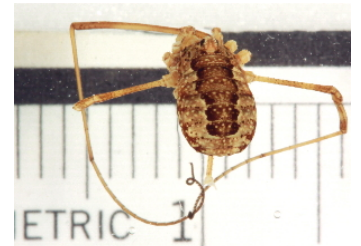

**09BBMYR-086 [Dorsal]**  
*Lithobius microps*  
Family: Lithobiidae  
BIN URI: BOLD:AAM7904

**TDWG-0953 [Dorsal]**  
*Phalangium opilio*  
Family: Phalangidae  
BIN URI: BOLD:AAI4346

**BC ZSM ARA 00045 [Adult]**  
*Oligolophus tridens*  
Family: Phalangidae  
BIN URI: BOLD:AAM8194

**BIOUG03997-C08 [Dorsal]**  
*Platybunus triangularis*  
Family: Phalangidae  
BIN URI: BOLD:ABW0506

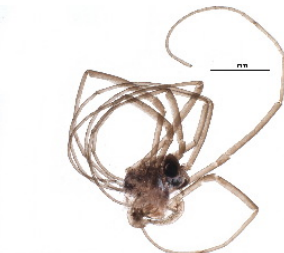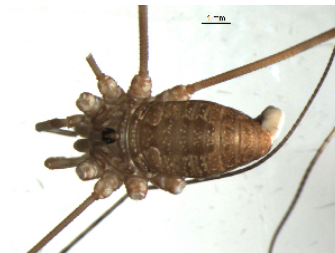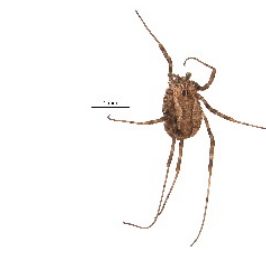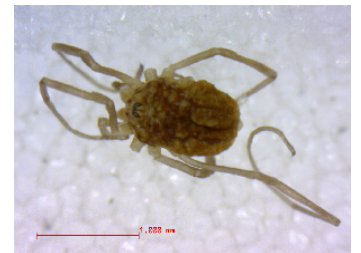

**BIOUG22837-C01 [Dorsal]**  
Caddo  
Family: Caddidae  
BIN URI: BOLD:ACV9424

**BIOUG00633-F05 [Dorsal]**  
*Leiobunum ventricosum*  
Family: Sclerosomatidae  
BIN URI: BOLD:AAH8497

**BIOUG22090-E02 [Dorsal]**  
*Leiobunum*  
Family: Sclerosomatidae  
BIN URI: BOLD:ACV5874

**BIOUG02613-D04 [Dorsal]**  
Oplionea  
BIN URI: BOLD:AAH7061

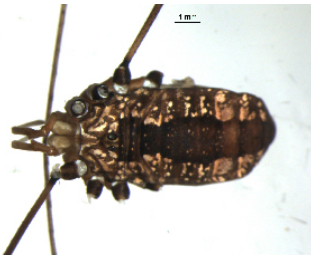

**BIOUG00633-G02 [Dorsal]**  
 Leibobunum  
 Family: Sclerosomatidae  
 BIN URI: BOLD:AAH7062

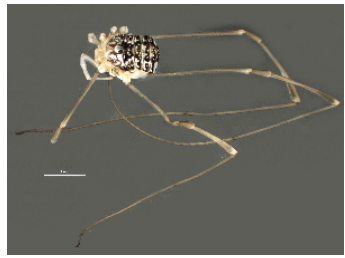

**BIOUG09060-B07 [Dorsal]**  
 Sclerosomatidae  
 Family: Sclerosomatidae  
 BIN URI: BOLD:ACL7580

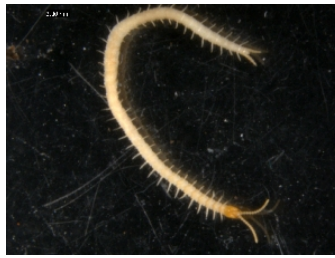

**MYRNO-0010 []**  
 Schendyla nemorensis  
 Family: Schendylidae  
 BIN URI: BOLD:AAG8560

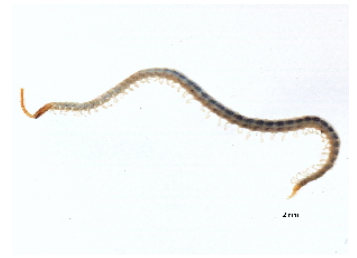

**BIOUG12435-H06 [Lateral]**  
 Geophilomorpha  
 BIN URI: BOLD:ACN4104

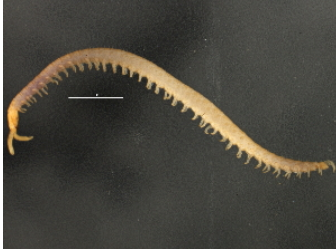

**BIOUG08056-H03 [Lateral]**  
 Geophilomorpha  
 BIN URI: BOLD:AAM7902

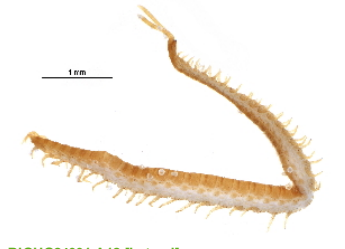

**BIOUG24001-A12 [Lateral]**  
 Schendylidae  
 Family: Schendylidae

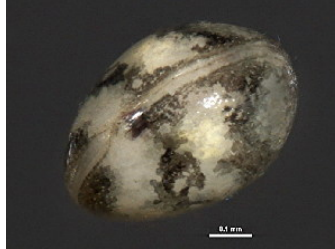

**NJAK-0103 [Lateral]**  
 Cypridopsis vidua  
 Family: Cyprididae  
 BIN URI: BOLD:AAH0892

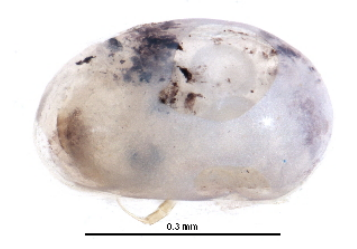

**BIOUG24026-C01 [Lateral]**  
 Cypria  
 Family: Candonidae

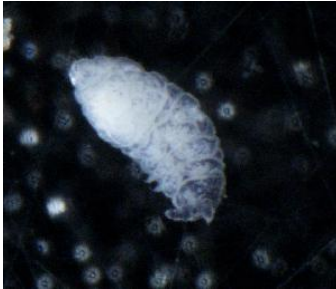

**ONTCOL0050 []**  
 Odontellidae  
 Family: Odontellidae  
 BIN URI: BOLD:AAC1432

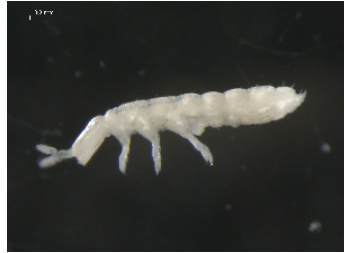

**CHU06-COL-1148 [Lateral]**  
 Protaphorura  
 Family: Onychiuridae  
 BIN URI: BOLD:AA80246

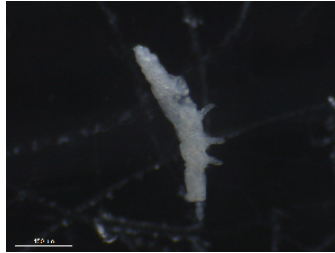

**12037-D06 [Dorsal]**  
 Tullbergiidae  
 Family: Tullbergiidae  
 BIN URI: BOLD:AAG0680

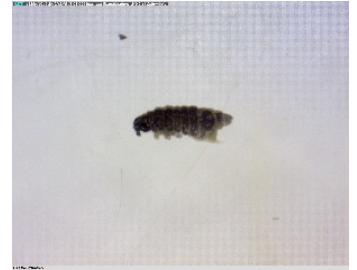

**BIOUG03204-D05 [Lateral]**  
 Collembola  
 BIN URI: BOLD:ACC7275

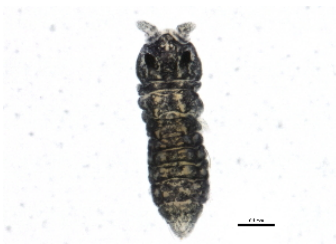

**BIOUG04812-E08 [Dorsal]**  
 Neanuridae  
 Family: Neanuridae  
 BIN URI: BOLD:AAB7286

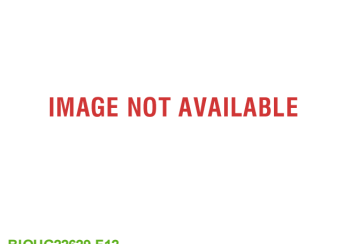

**BIOUG22629-F12**  
 Poduromorpha  
 BIN URI: BOLD:ACV5680

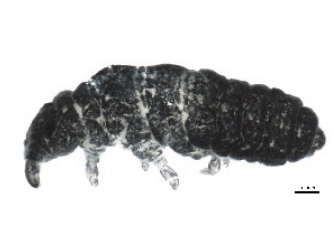

**BIOUG04093-E11 [Lateral]**  
 Poduromorpha  
 BIN URI: BOLD:ACF1937

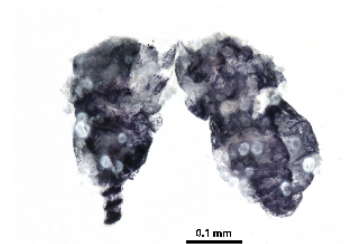

**BIOUG22846-D12 [Lateral]**  
 Poduromorpha  
 BIN URI: BOLD:ACV6302

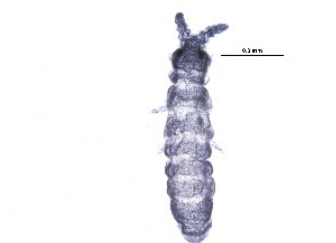

**BIOUG22846-A04 [Dorsal]**  
 Poduromorpha  
 BIN URI: BOLD:ACV7152

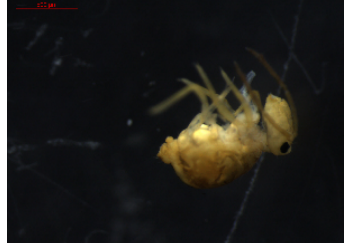

**01336-C10 [Lateral]**  
 Dicyrtomina minuta  
 Family: Dicyrtomidae  
 BIN URI: BOLD:ACQ0383

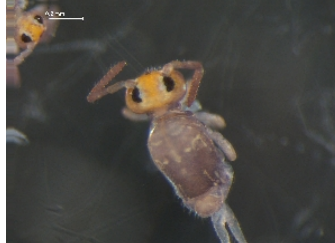

**CHU06-COL-1010 [Dorsal]**  
 Deuterominthurus sp1  
 Family: Bourletellidae  
 BIN URI: BOLD:AAB7915

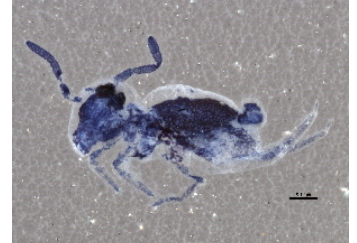

**BIOUG05516-D08 [Lateral]**  
 Bourletella  
 Family: Bourletellidae  
 BIN URI: BOLD:ABX0027

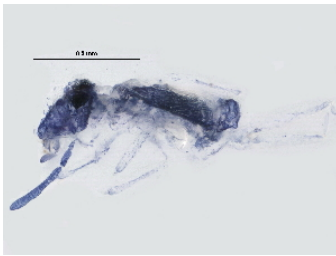

**BIOUG13497-G01 [Lateral]**  
Collembola  
BIN URI: BOLD:ACN4506

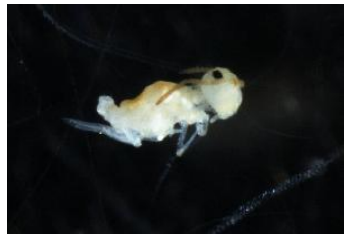

**ONTCOL0051 []**  
Bourletiellidae  
Family: Bourletiellidae  
BIN URI: BOLD:AAB7913

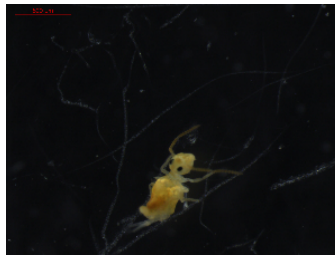

**01336-B08 [Dorsal]**  
Bourletiellidae  
Family: Bourletiellidae  
BIN URI: BOLD:AAZ2180

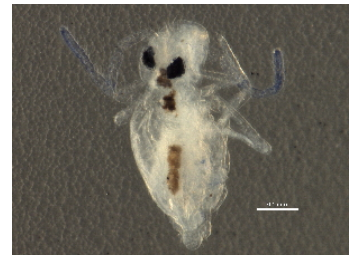

**BIOUG09351-F01 [Dorsal]**  
Collembola  
BIN URI: BOLD:ACJ7454

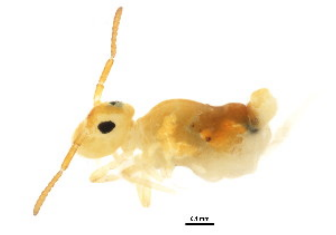

**BIOUG02093-G01 [Lateral]**  
Collembola  
BIN URI: BOLD:AAB7914

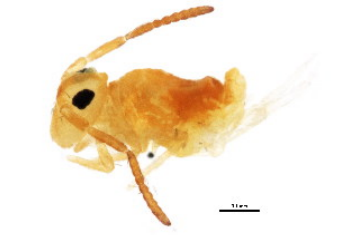

**BIOUG04016-H04 [Lateral]**  
Bourletiellidae  
Family: Bourletiellidae  
BIN URI: BOLD:ACC0359

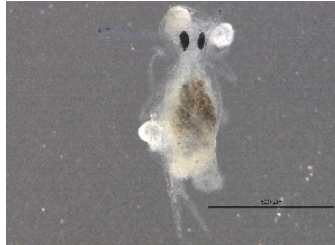

**BIOUG16104-G03 [Dorsal]**  
Bourletiella  
Family: Bourletiellidae  
BIN URI: BOLD:ACV5610

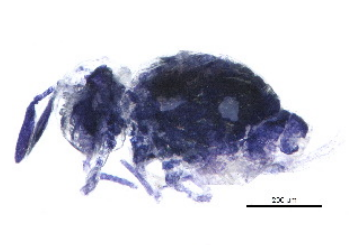

**BIOUG11945-A05 [Lateral]**  
Collembola  
BIN URI: BOLD:ABA5370

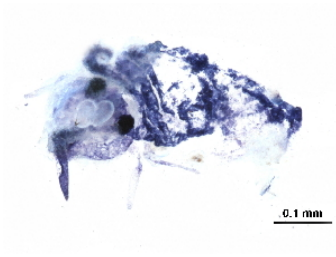

**BIOUG21887-G08 [Lateral]**  
Symphyleona  
BIN URI: BOLD:ACV4618

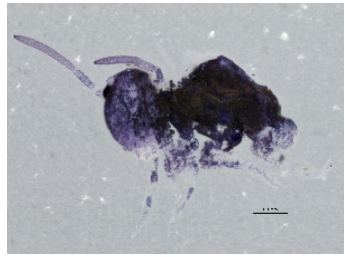

**BIOUG08570-E02 [Lateral]**  
Sminthurinus elegans  
Family: Katiannidae  
BIN URI: BOLD:AAB3496

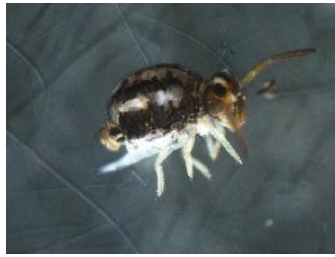

**ONTCOL0071 []**  
Sminthurinus elegans  
Family: Katiannidae  
BIN URI: BOLD:AAB3495

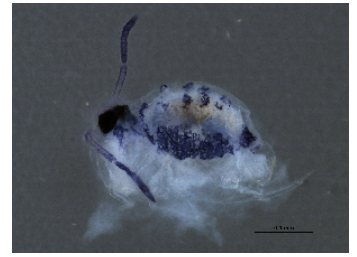

**BIOUG09123-C09 [Lateral]**  
Collembola  
BIN URI: BOLD:ACJ9068

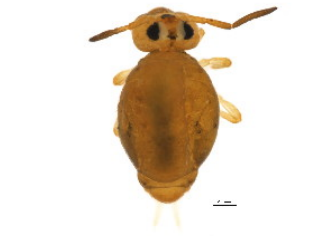

**BIOUG02093-E01 [Dorsal]**  
Collembola  
BIN URI: BOLD:AAI4706

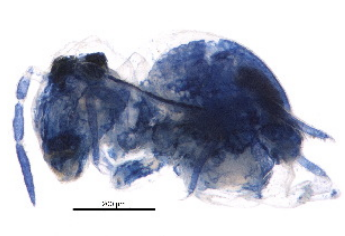

**BIOUG20566-C12 [Lateral]**  
Symphyleona  
BIN URI: BOLD:ACV5788

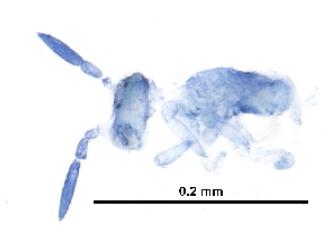

**BIOUG21883-F04 [Lateral]**  
Symphyleona  
BIN URI: BOLD:ACV4139

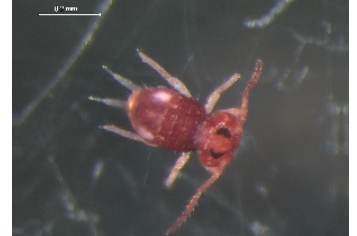

**CHU06-COL-1060 [Dorsal]**  
Sminthurides sp1  
Family: Sminthuridae  
BIN URI: BOLD:AAG3938

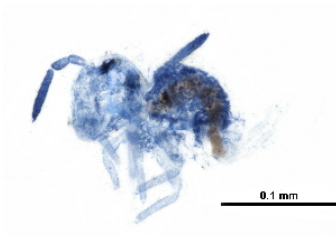

**BIOUG21885-G05 [Lateral]**  
Symphyleona  
BIN URI: BOLD:ACV4567

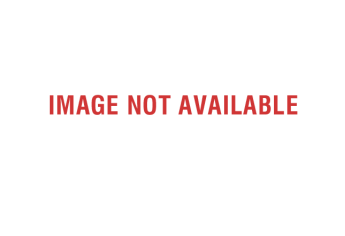

**BIOUG21885-F07**  
Symphyleona  
BIN URI: BOLD:ACV4365

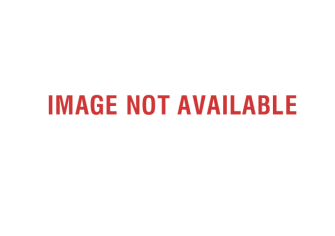

**BIOUG21898-D02**  
Symphyleona  
BIN URI: BOLD:ACV5320

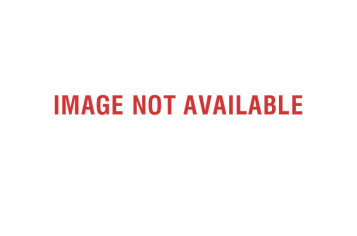

**BIOUG21887-C02**  
Symphyleona

IMAGE NOT AVAILABLE

BIOUG21887-B09  
Symphyleona  
BIN URI: BOLD:ACV4528

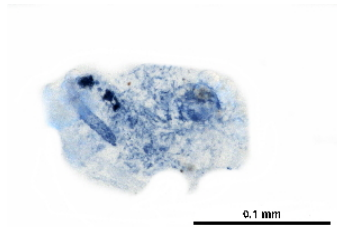

BIOUG21885-G07 [Lateral]  
Symphyleona  
BIN URI: BOLD:ACV4522

IMAGE NOT AVAILABLE

BIOUG21887-B08  
Symphyleona

IMAGE NOT AVAILABLE

BIOUG20566-A10  
Isotomidae  
Family: Isotomidae  
BIN URI: BOLD:ACV5561

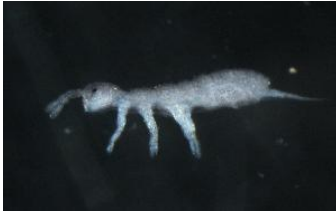

ONTCOL0066 []  
Parisotoma notabilis L2  
Family: Isotomidae  
BIN URI: BOLD:AAB2868

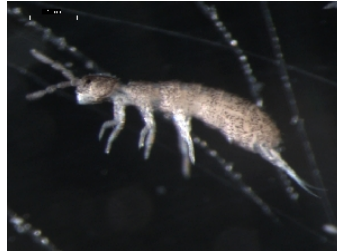

ONTCOL0477 []  
Parisotoma notabilis L2  
Family: Isotomidae  
BIN URI: BOLD:AAB2869

IMAGE NOT AVAILABLE

BIOUG21883-C06  
Parisotoma notabilis  
Family: Isotomidae

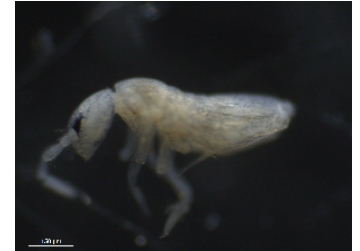

16709-D08 [Lateral]  
Parisotoma notabilis L2  
Family: Isotomidae  
BIN URI: BOLD:AAB2870

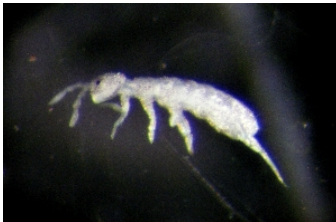

ONTCOL0378 []  
Parisotoma notabilis L1  
Family: Isotomidae  
BIN URI: BOLD:ABZ8106

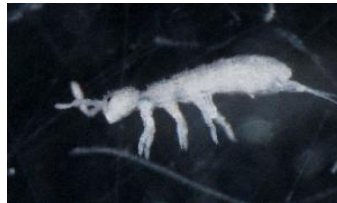

ONTCOL0040 []  
Parisotoma notabilis L1  
Family: Isotomidae  
BIN URI: BOLD:AAA4157

IMAGE NOT AVAILABLE

BIOUG21887-H10  
Isotomidae  
Family: Isotomidae  
BIN URI: BOLD:ACV4617

IMAGE NOT AVAILABLE

ONTCOL0168  
Isotomidae  
Family: Isotomidae  
BIN URI: BOLD:AAB2085

IMAGE NOT AVAILABLE

BIOUG21887-H05  
Isotomidae  
Family: Isotomidae

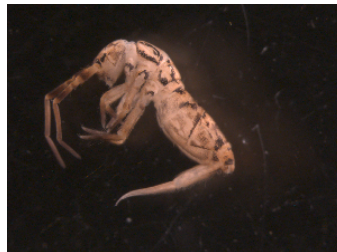

DAREK-0039 [Lateral]  
Orchesella villosa  
Family: Entomobryidae  
BIN URI: BOLD:AAA8726

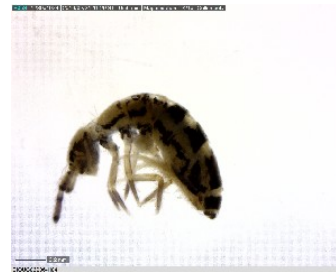

BIOUG03206-H04 [lateral]  
Collembola  
BIN URI: BOLD:ABA5351

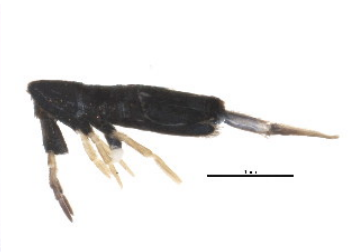

BIOUG02130-G04 [Lateral]  
Collembola  
BIN URI: BOLD:AAB8452

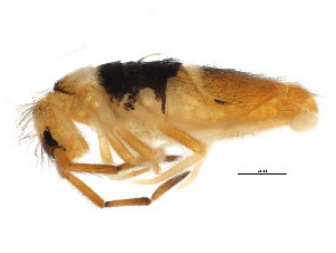

BIOUG04310-G04 [Lateral]  
Entomobrya atrocincta  
Family: Entomobryidae  
BIN URI: BOLD:ACE5102

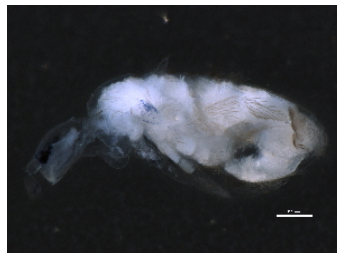

BIOUG07135-A05 [Lateral]  
Lepidocyrtus  
Family: Entomobryidae  
BIN URI: BOLD:ACI2943

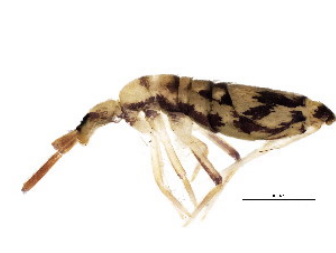

BIOUG04016-H05 [Lateral]  
Entomobrya  
Family: Entomobryidae  
BIN URI: BOLD:ACL6239

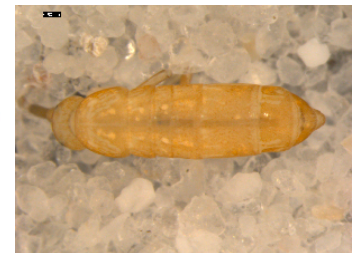

BIOUG00037-81 [Dorsal]  
Tomoceridae  
Family: Tomoceridae  
BIN URI: BOLD:AAA7969

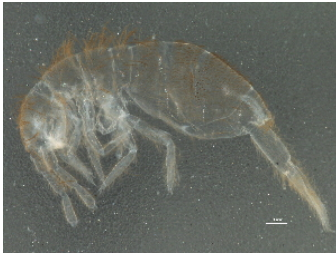

**BIOUG01653-A09 [Lateral]**  
Collembola  
BIN URI: BOLD:ABA5361

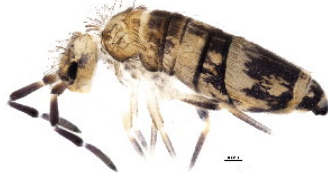

**BIOUG03735-F01 [Lateral]**  
Lepidocyrtus  
Family: Entomobryidae  
BIN URI: BOLD:ACM2009

IMAGE NOT AVAILABLE

**BIOUG22628-B03**  
Lepidocyrtus  
Family: Entomobryidae

IMAGE NOT AVAILABLE

**BIOUG20572-A11**  
Poduromorpha  
BIN URI: BOLD:ACV4568

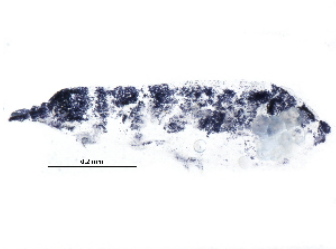

**BIOUG15211-D04 [Lateral]**  
Collembola  
BIN URI: BOLD:ACL3025

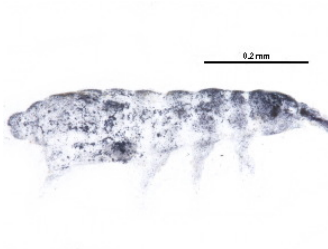

**BIOUG22846-A05 [Lateral]**  
Odontellidae  
Family: Odontellidae  
BIN URI: BOLD:ACV7054

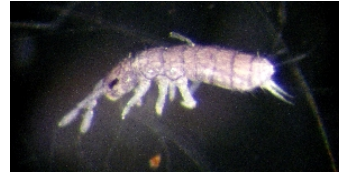

**ONTCOL0430 []**  
Isotomidae  
Family: Isotomidae  
BIN URI: BOLD:AAH7174

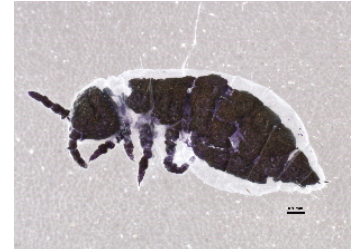

**BIOUG05516-D05 [Lateral]**  
Poduromorpha  
BIN URI: BOLD:AAA4811

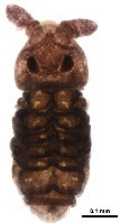

**BIOUG02093-D10 [Dorsal]**  
Collembola  
BIN URI: BOLD:AAI3738

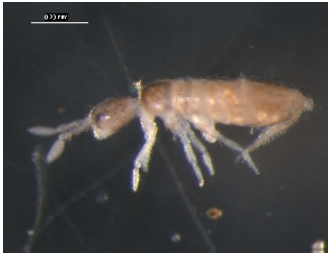

**ONTCOL0588 [Lateral]**  
Entomobryidae  
Family: Entomobryidae  
BIN URI: BOLD:AAA9292

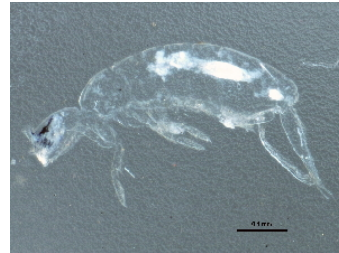

**BIOUG04597-D11 [Lateral]**  
Entomobryidae  
Family: Entomobryidae  
BIN URI: BOLD:ACE2737

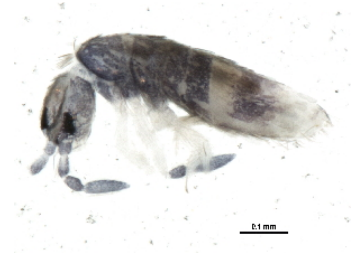

**BIOUG04291-C12 [Lateral]**  
Entomobryidae  
Family: Entomobryidae  
BIN URI: BOLD:ACD9424

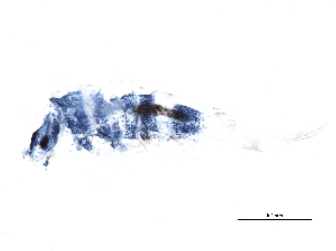

**BIOUG11033-F11 [Lateral]**  
Entomobryidae  
Family: Entomobryidae  
BIN URI: BOLD:ACK8463

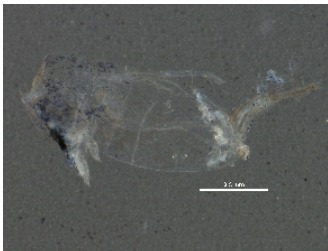

**BIOUG06960-A01 [Lateral]**  
Entomobryomorpha  
BIN URI: BOLD:ACH3809

IMAGE NOT AVAILABLE

**BIOUG21775-B08**  
Entomobryomorpha

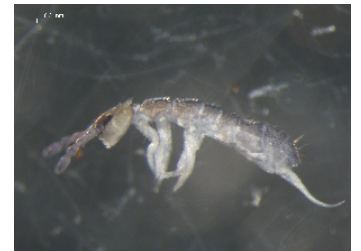

**CHU06-COL-1196 [Lateral]**  
Isotomidae  
Family: Isotomidae  
BIN URI: BOLD:AAI2077

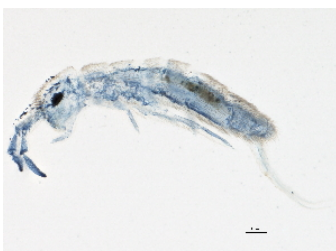

**BIOUG13043-A11 [Lateral]**  
Isotomidae  
Family: Isotomidae  
BIN URI: BOLD:ACJ0127

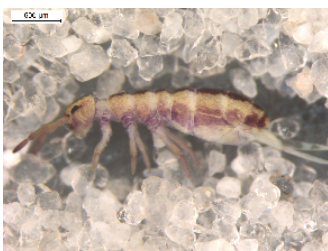

**BIOUG00506-64 [Lateral]**  
Isotomidae  
Family: Isotomidae  
BIN URI: BOLD:AAN6552

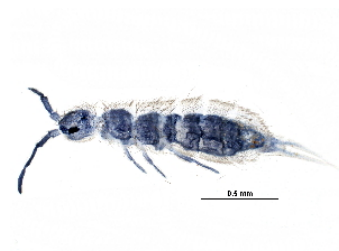

**BIOUG21887-A07 [Lateral]**  
Entomobryomorpha  
BIN URI: BOLD:ACV4619

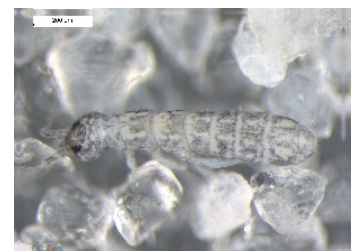

**BIOUG00172-59 [Dorsal]**  
Isotomidae  
Family: Isotomidae  
BIN URI: BOLD:AAN6535



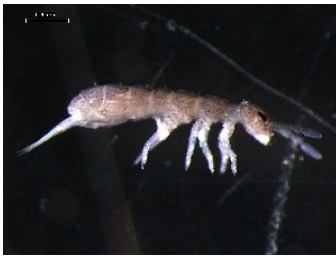

**ONTCOL0478 []**  
Isotomidae  
Family: Isotomidae  
BIN URI: BOLD:AAA7162

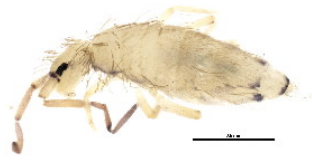

**BIOUG02130-G05 [Lateral]**  
Collembola  
BIN URI: BOLD:AAA7246

**IMAGE NOT AVAILABLE**

**BIOUG21887-D03**  
Entomobryomorpha

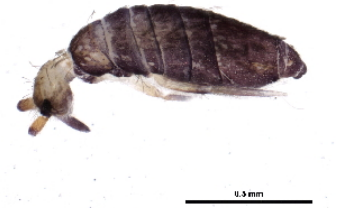

**BIOUG04503-F02 [Lateral]**  
Entomobrya sp.  
Family: Entomobryidae  
BIN URI: BOLD:AAA7249

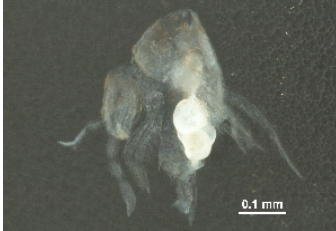

**BIOUG21887-A01 [Lateral]**  
Entomobryomorpha

BIN URI: BOLD:ACV4512

**IMAGE NOT AVAILABLE**

**BIOUG20572-B07**  
Entomobryomorpha

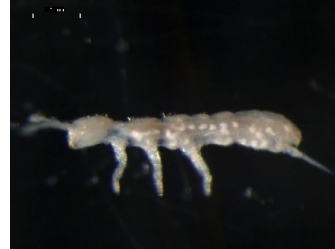

**ONTCOL0472 []**  
Isotomidae  
Family: Isotomidae  
BIN URI: BOLD:ACJ0088

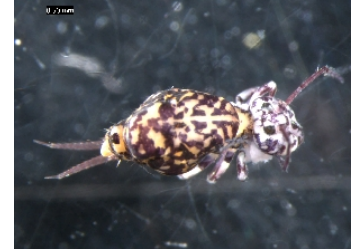

**COLC-DAV46 [Lateral]**  
Dicyrtomina  
Family: Dicyrtomidae  
BIN URI: BOLD:AAF5859

**IMAGE NOT AVAILABLE**

**BIOUG20566-C04**  
Symphleona  
BIN URI: BOLD:ACV4456

**IMAGE NOT AVAILABLE**

**BIOUG24001-A01**  
Collembola

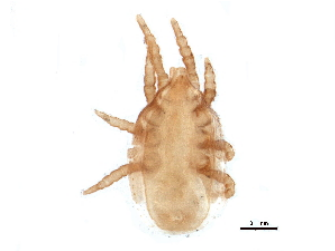

**BIOUG07381-G01 [Dorsal]**  
Dinychidae  
Family: Dinychidae  
BIN URI: BOLD:ACG2115

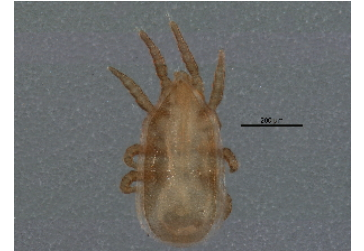

**BIOUG07274-A01 [Dorsal]**  
Dinychidae  
Family: Dinychidae  
BIN URI: BOLD:ACI9637

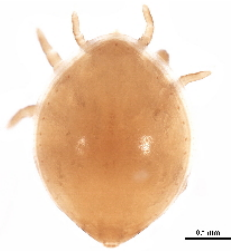

**BIOUG23322-A05 [Dorsal]**  
Uroobovella  
Family: Urodinychidae  
BIN URI: BOLD:AA9562

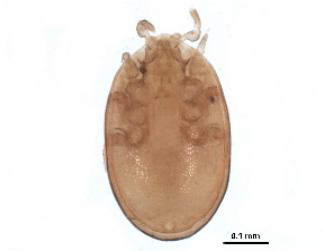

**BIOUG24000-F12 [Dorsal]**  
Trematuridae  
Family: Trematuridae

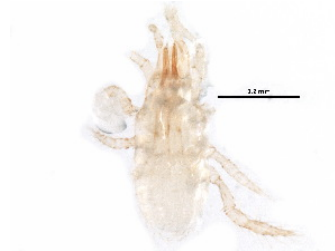

**BIOUG21899-C05 [Dorsal]**  
Mesostigmata  
BIN URI: BOLD:ACV5531

**IMAGE NOT AVAILABLE**

**BIOUG22846-E11**  
Mesostigmata  
BIN URI: BOLD:ACV7505

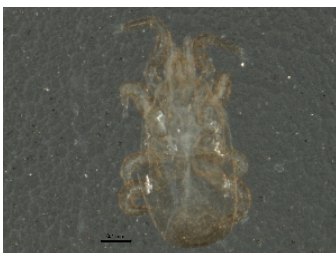

**BIOUG05505-C09 [Lateral]**  
Digamasellidae  
Family: Digamasellidae  
BIN URI: BOLD:ABW5651

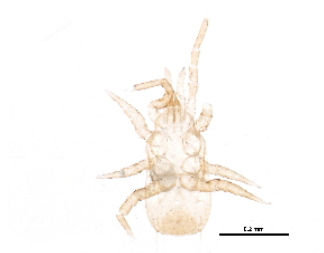

**BIOUG06909-D02 [Dorsal]**  
Mesostigmata  
BIN URI: BOLD:ACC6566

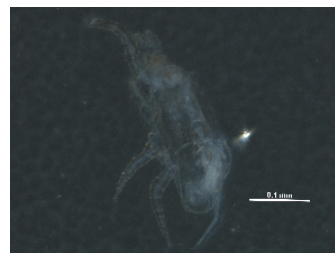

**BIOUG16226-C05 [Dorsal]**  
Digamasellidae  
Family: Digamasellidae  
BIN URI: BOLD:ACL9334

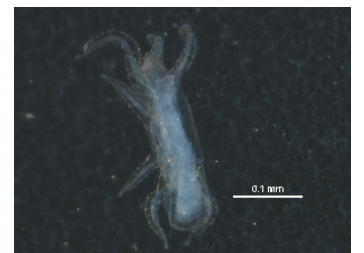

**BIOUG16226-E07 [Dorsal]**  
Digamasellidae  
Family: Digamasellidae  
BIN URI: BOLD:ACR0807

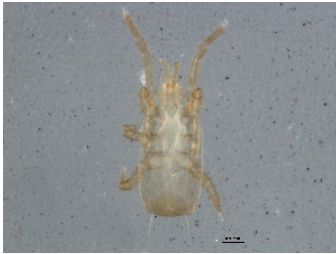

**BIOUG05872-E05 [Dorsal]**  
Digamasellidae  
Family: Digamasellidae  
BIN URI: BOLD:ACG6639

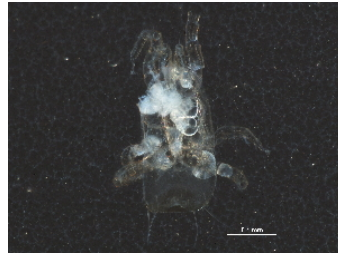

**BIOUG10650-A06 [Dorsal]**  
Digamasellidae  
Family: Digamasellidae  
BIN URI: BOLD:ACM8656

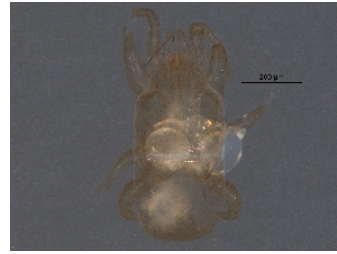

**BIOUG11727-H03 [Dorsal]**  
Digamasellidae  
Family: Digamasellidae  
BIN URI: BOLD:ACM3263

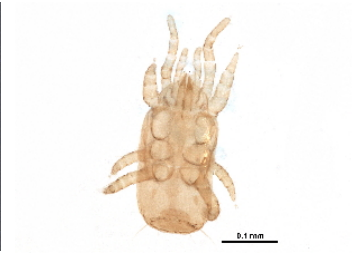

**BIOUG22354-H05 [Dorsal]**  
Digamasellidae  
Family: Digamasellidae  
BIN URI: BOLD:ACV4509

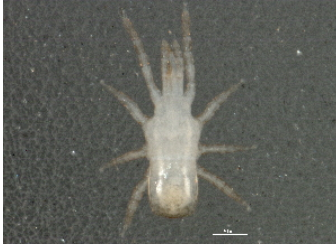

**BIOUG04017-G10 [Dorsal]**  
Digamasellidae  
Family: Digamasellidae  
BIN URI: BOLD:ACM1195

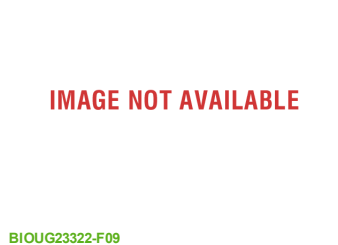

**BIOUG23322-F09**  
Digamasellidae  
Family: Digamasellidae  
BIN URI: BOLD:ACW0844

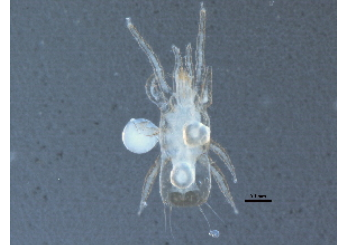

**BIOUG06813-B01 [Dorsal]**  
Digamasellidae  
Family: Digamasellidae  
BIN URI: BOLD:ACM1395

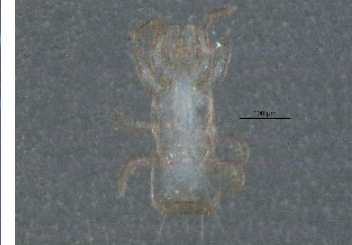

**BIOUG07274-C06 [Dorsal]**  
Digamasellidae  
Family: Digamasellidae  
BIN URI: BOLD:ACH4162

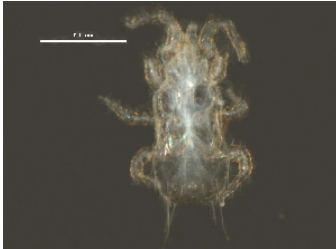

**BIOUG07003-H09 [Dorsal]**  
Digamasellidae  
Family: Digamasellidae  
BIN URI: BOLD:ACG9322

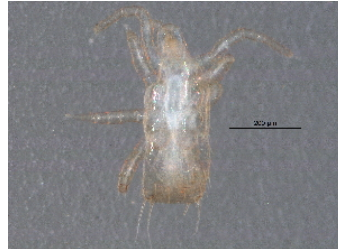

**BIOUG07273-B12 [Dorsal]**  
Digamasellidae  
Family: Digamasellidae  
BIN URI: BOLD:ACI5517

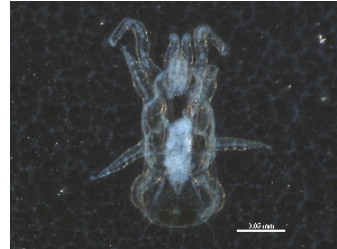

**BIOUG10650-G12 [Dorsal]**  
Digamasellidae  
Family: Digamasellidae  
BIN URI: BOLD:ACI5353

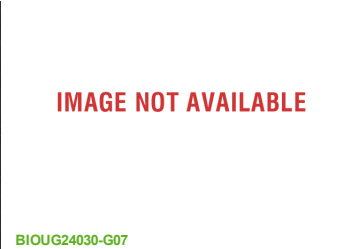

**BIOUG24030-G07**  
Rhodacarellus silesiacus  
Family: Rhodacaridae

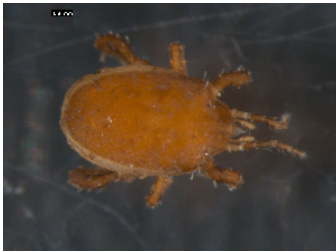

**08MIONT-0091 [Dorsal]**  
Macrochelidae  
Family: Macrochelidae  
BIN URI: BOLD:AAF9126

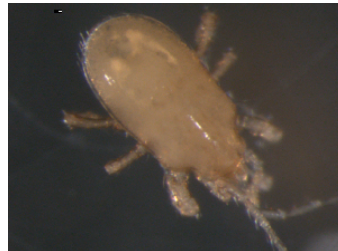

**08MIONT-0246 [Dorsal]**  
Parasitidae  
Family: Parasitidae  
BIN URI: BOLD:AAF9125

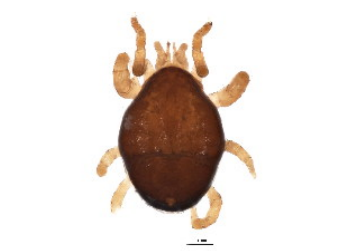

**BIOUG03211-F12 [Dorsal]**  
Parasitidae  
Family: Parasitidae  
BIN URI: BOLD:AAF9285

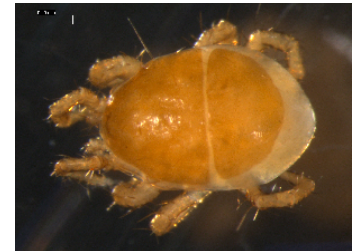

**BIOUG00036-10 [Dorsal]**  
Parasitidae  
Family: Parasitidae  
BIN URI: BOLD:AAM7982

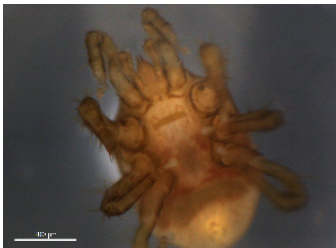

**BIOUG10944-D11 [V]**  
Parasitidae  
Family: Parasitidae  
BIN URI: BOLD:AAZ0396

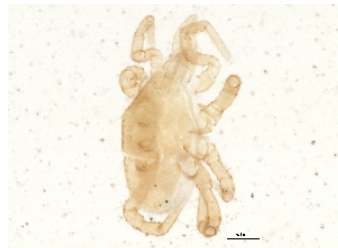

**BIOUG05559-B12 [Dorsal]**  
Parasitidae  
Family: Parasitidae  
BIN URI: BOLD:AAN6711

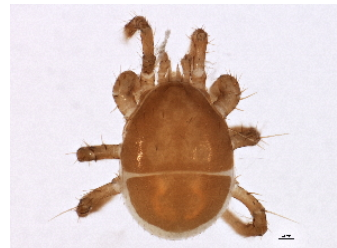

**BIOUG03832-H11 [Dorsal]**  
Parasitidae  
Family: Parasitidae  
BIN URI: BOLD:ABY2035

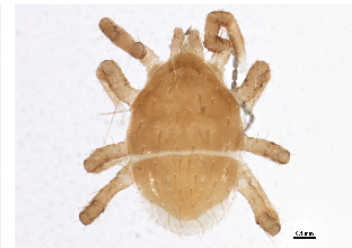

**BIOUG03832-A11 [Dorsal]**  
Parasitidae  
Family: Parasitidae  
BIN URI: BOLD:ACC0819

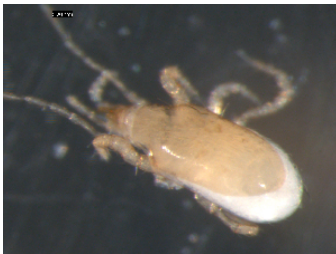

**08MIONT-0120 [Dorsal]**  
Leptolaelapidae  
Family: Leptolaelapidae  
BIN URI: BOLD:AAF9134

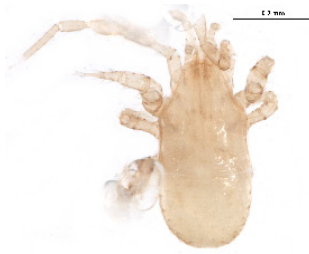

**BIOUG21899-B05 [Dorsal]**  
Mesostigmata  
BIN URI: BOLD:ACO2718

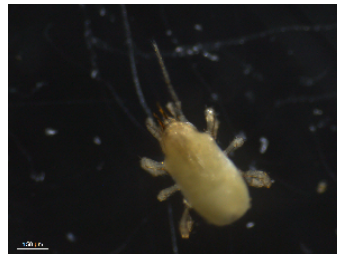

**12037-A02 [Dorsal]**  
Arachnida  
BIN URI: BOLD:ABX1977

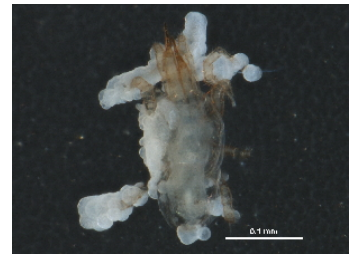

**BIOUG21884-A11 [Dorsal]**  
Mesostigmata  
BIN URI: BOLD:ACV5225

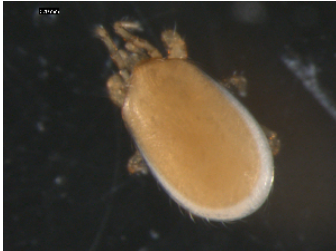

**08MIONT-0165 [Dorsal]**  
Pachylaelapidae  
Family: Pachylaelapidae  
BIN URI: BOLD:AAF9143

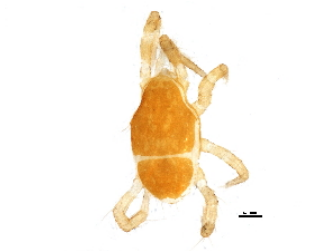

**BIOUG03530-F05 [Dorsal]**  
Parasitidae  
Family: Parasitidae  
BIN URI: BOLD:ACC9233

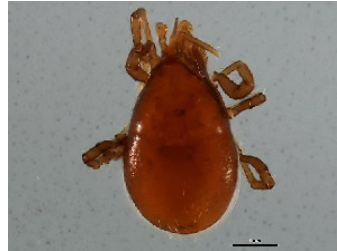

**TDWG-0490 [Dorsal]**  
Parasitidae  
Family: Parasitidae  
BIN URI: BOLD:AAF9093

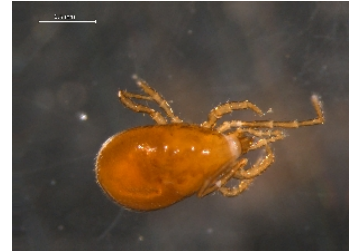

**08MIONT-0415 [Dorsal]**  
Parasitidae  
Family: Parasitidae  
BIN URI: BOLD:AAF9229

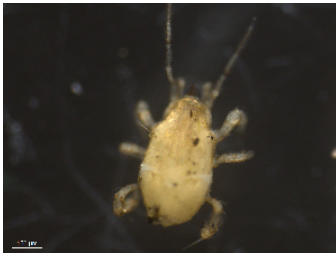

**11982-C01 [Dorsal]**  
Arachnida  
BIN URI: BOLD:AAF9186

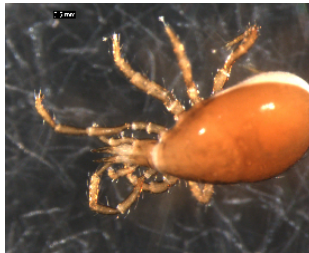

**08DPMIT-0891 [Dorsal]**  
Parasitidae  
Family: Parasitidae  
BIN URI: BOLD:AAF9099

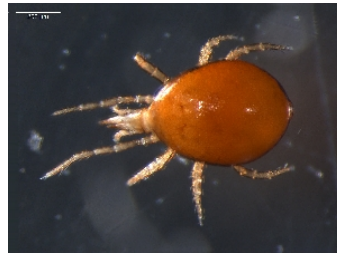

**DPMIT-20-28 [Dorsal]**  
Parasitidae  
Family: Parasitidae  
BIN URI: BOLD:AAF9096

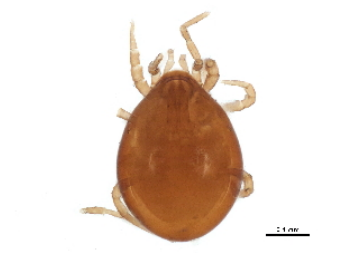

**BIOUG21882-B12 [Lateral]**  
Parasitidae  
Family: Parasitidae  
BIN URI: BOLD:ACV6452

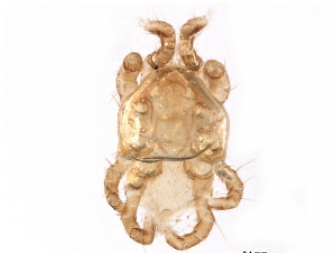

**BIOUG23322-A02 [Dorsal]**  
Parasitidae  
Family: Parasitidae  
BIN URI: BOLD:ACW0761

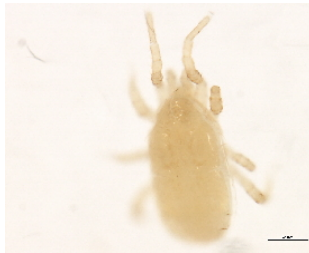

**MITEPAR-0092 [Dorsal]**  
Ascidae  
Family: Ascidae  
BIN URI: BOLD:AAN6706

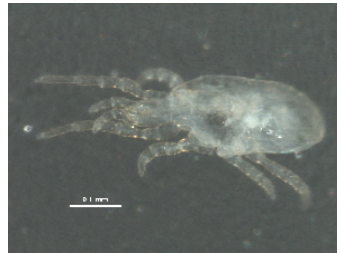

**BIOUG01769-F03 [Dorsal]**  
Ascidae  
Family: Ascidae  
BIN URI: BOLD:ABW2693

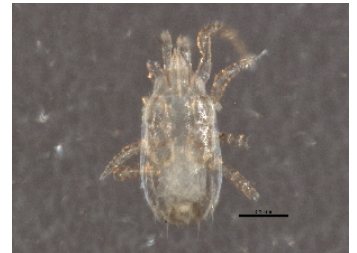

**BIOUG05655-H09 [Lateral]**  
Ascidae  
Family: Ascidae  
BIN URI: BOLD:ACF8021

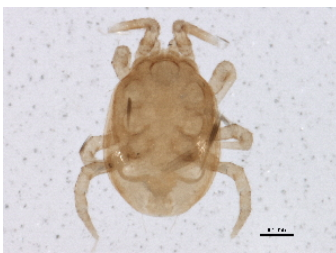

**BIOUG03832-A05 [Dorsal]**  
Proctolaelaps  
Family: Melicharidae  
BIN URI: BOLD:AAZ5835

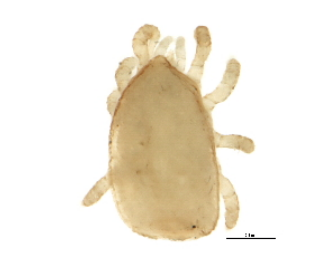

**BIOUG01238-D06 [Dorsal]**  
Ascidae  
Family: Ascidae  
BIN URI: BOLD:ACM1800

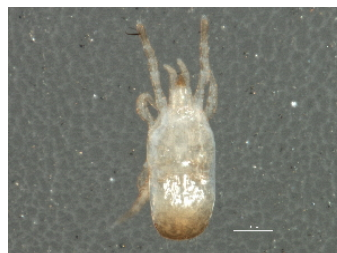

**BIOUG04832-D06 [Dorsal]**  
Ascidae  
Family: Ascidae  
BIN URI: BOLD:ACD8928

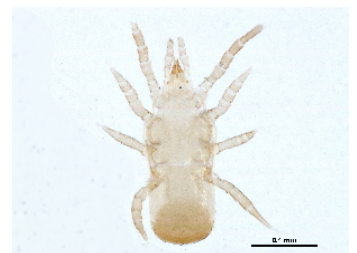

**BIOUG21882-C03 [Lateral]**  
Mesostigmata  
BIN URI: BOLD:ACV5970

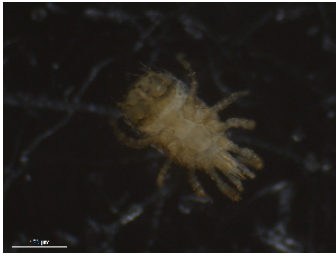

16711-G04 [Ventral]  
Arachnida

BIN URI: BOLD:ABW8100

IMAGE NOT AVAILABLE

BIOUG24030-C11  
Laelapidae  
Family: Laelapidae

IMAGE NOT AVAILABLE

BIOUG22364-B08  
Mesostigmata  
BIN URI: BOLD:ACV4707

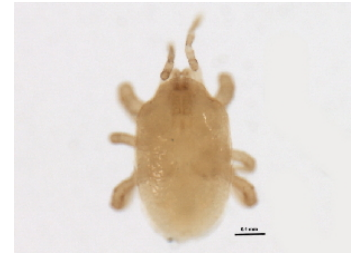

BIOUG00209-D05 [Dorsal]  
Macrocheles  
Family: Macrochelidae  
BIN URI: BOLD:AAM8020

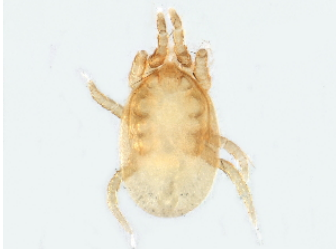

BIOUG09351-F11 [Dorsal]  
Laelapidae  
Family: Laelapidae  
BIN URI: BOLD:ACL6729

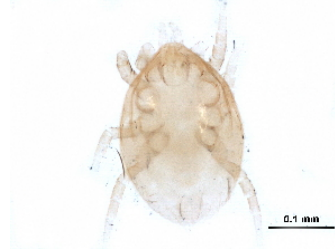

BIOUG22240-F08 [Dorsal]  
Laelapidae  
Family: Laelapidae  
BIN URI: BOLD:ACV2285

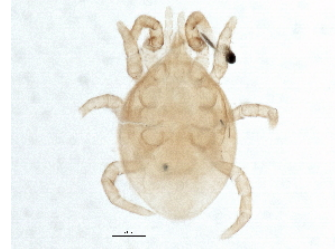

BIOUG05718-D05 [Dorsal]  
Laelapidae  
Family: Laelapidae  
BIN URI: BOLD:ACF7854

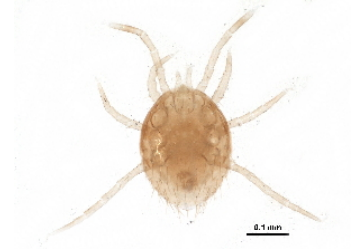

BIOUG22630-C11 [Dorsal]  
Mesostigmata  
BIN URI: BOLD:ACV4995

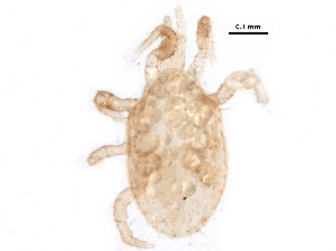

BIOUG22841-F10 [Dorsal]  
Laelapidae  
Family: Laelapidae  
BIN URI: BOLD:ACV8565

IMAGE NOT AVAILABLE

BIOUG23322-E01  
Phytoseiidae  
Family: Phytoseiidae  
BIN URI: BOLD:ACK6743

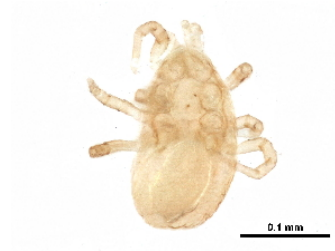

BIOUG22631-H03 [Dorsal]  
Phytoseiidae  
Family: Phytoseiidae  
BIN URI: BOLD:ACV5408

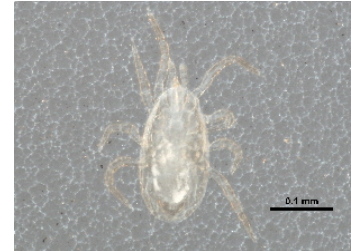

BIOUG22631-E03 [Dorsal]  
Phytoseiidae  
Family: Phytoseiidae  
BIN URI: BOLD:ACV5953

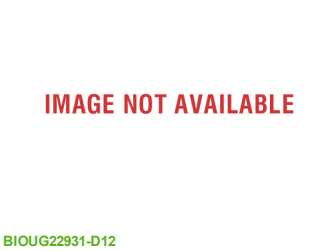

IMAGE NOT AVAILABLE

BIOUG22931-D12  
Phytoseiidae  
Family: Phytoseiidae  
BIN URI: BOLD:ACV5971

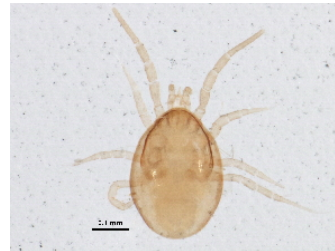

BIOUG05716-H11 [Dorsal]  
Phytoseiidae  
Family: Phytoseiidae  
BIN URI: BOLD:ACF8412

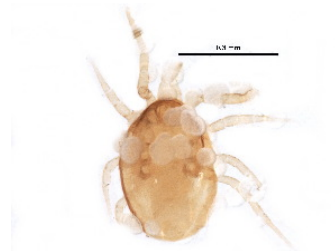

BIOUG22873-G05 [Dorsal]  
Phytoseiidae  
Family: Phytoseiidae  
BIN URI: BOLD:ACV6731

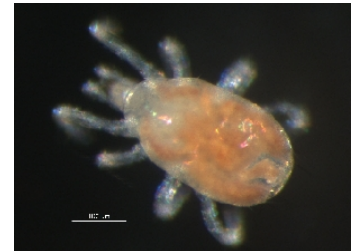

BIOUG05654-B11 [Lateral]  
Phytoseiidae  
Family: Phytoseiidae  
BIN URI: BOLD:ACF8044

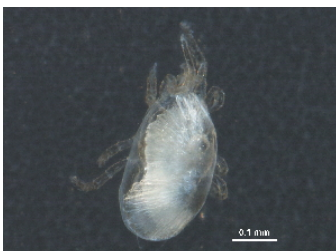

BIOUG10650-D05 [Dorsal]  
Phytoseiidae  
Family: Phytoseiidae  
BIN URI: BOLD:ACK8761

IMAGE NOT AVAILABLE

BIOUG22841-E12  
Phytoseiidae  
Family: Phytoseiidae  
BIN URI: BOLD:ACW0290

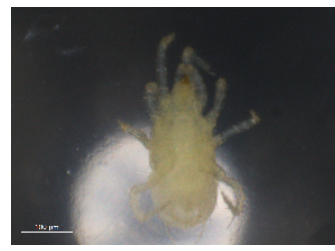

BIOUG10944-C12 [V]  
Phytoseiidae  
Family: Phytoseiidae  
BIN URI: BOLD:ACL5806

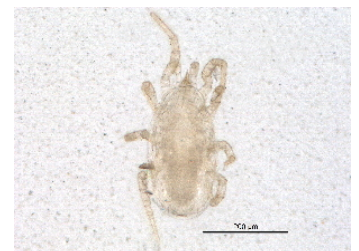

BIOUG06925-B03 [Dorsal]  
Phytoseiidae  
Family: Phytoseiidae  
BIN URI: BOLD:ACI5481

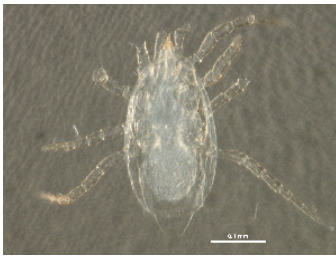

**BIOUG06962-F05 [Dorsal]**  
Phytoseiidae  
Family: Phytoseiidae  
BIN URI: BOLD:ACD9359

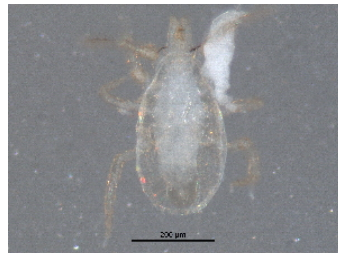

**BIOUG09853-H03 [Dorsal]**  
Phytoseiidae  
Family: Phytoseiidae  
BIN URI: BOLD:ACM2034

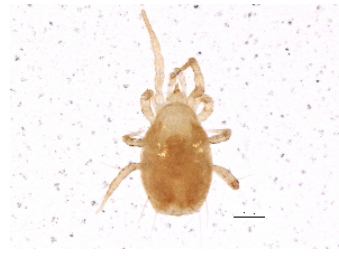

**BIOUG04017-E01 [Dorsal]**  
Phytoseiidae  
Family: Phytoseiidae  
BIN URI: BOLD:ACC1906

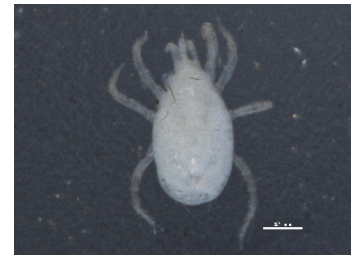

**BIOUG03830-F11 [Dorsal]**  
Phytoseiidae  
Family: Phytoseiidae  
BIN URI: BOLD:ACB9781

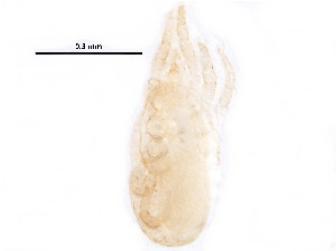

**BIOUG22873-G01 [Dorsal]**  
Phytoseiidae  
Family: Phytoseiidae  
BIN URI: BOLD:ACW0597

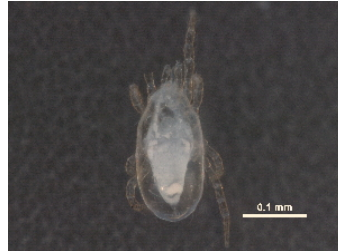

**BIOUG22240-F03 [Dorsal]**  
Phytoseiidae  
Family: Phytoseiidae  
BIN URI: BOLD:ACV2903

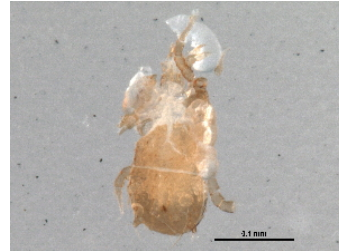

**BIOUG21899-A11 [Dorsal]**  
Ascidae  
Family: Ascidae  
BIN URI: BOLD:ACV6067

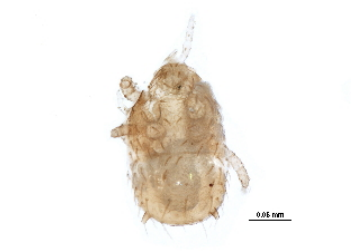

**BIOUG21882-C11 [Lateral]**  
Ascidae  
Family: Ascidae  
BIN URI: BOLD:ACV4959

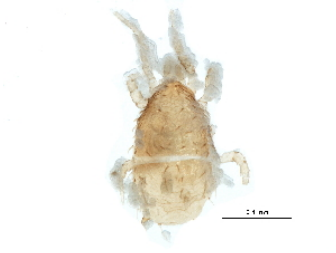

**BIOUG21882-D01 [Lateral]**  
Ascidae  
Family: Ascidae  
BIN URI: BOLD:ACV3486

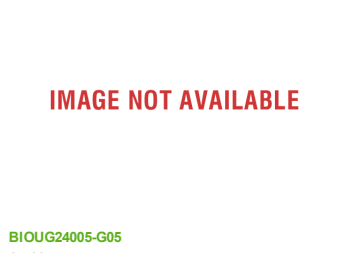

**IMAGE NOT AVAILABLE**

**BIOUG24005-G05**  
Ascidae  
Family: Ascidae

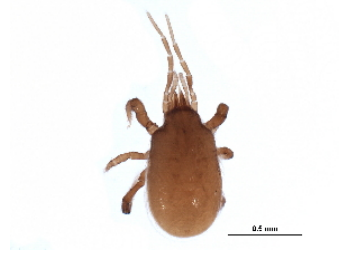

**BIOUG24000-A11 [Dorsal]**  
Mesostigmata

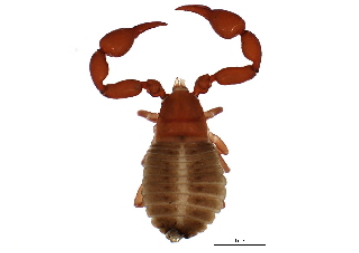

**BIOUG00863-G06 [Lateral]**  
Chernetidae  
Family: Chernetidae  
BIN URI: BOLD:AY6678

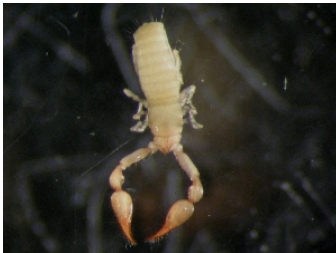

**PSCA002 [Dorsal]**  
Microbisium  
Family: Neobisiidae  
BIN URI: BOLD:AAB2506

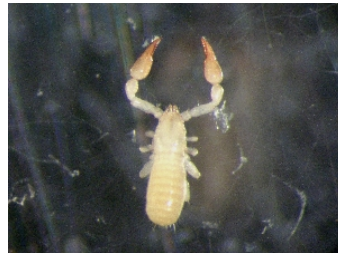

**PSCA035 [Dorsal]**  
Microbisium  
Family: Neobisiidae  
BIN URI: BOLD:AAB2511

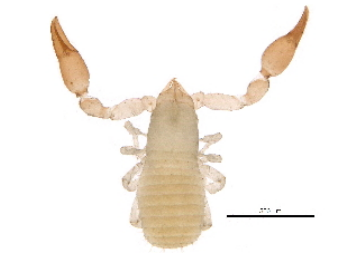

**BIOUG21887-F10 [Dorsal]**  
Microbisium  
Family: Neobisiidae  
BIN URI: BOLD:AAB2508

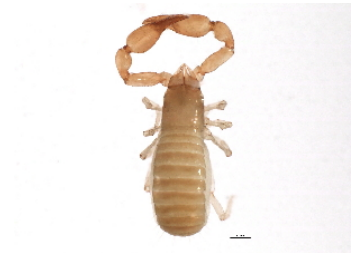

**BIOUG02858-H11 [Dorsal]**  
Microbisium  
Family: Neobisiidae  
BIN URI: BOLD:AY6677

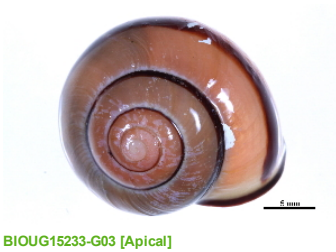

**BIOUG15233-G03 [Apical]**  
Cepaea nemoralis  
Family: Helicidae  
BIN URI: BOLD:AAG1590

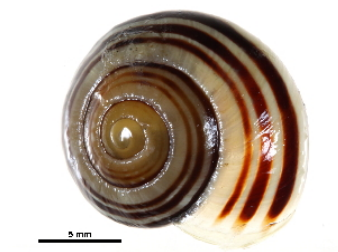

**BIOUG15234-A01 [Apical]**  
Cepaea nemoralis  
Family: Helicidae  
BIN URI: BOLD:AAU0190

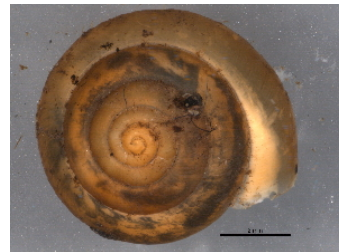

**BIOUG09921-D04 [Dorsal]**  
Trochulus hispidus  
Family: Hygromiidae  
BIN URI: BOLD:ACI9420

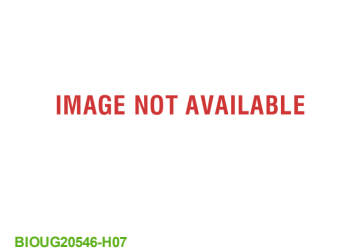

**IMAGE NOT AVAILABLE**

**BIOUG20546-H07**  
Trochulus  
Family: Hygromiidae  
BIN URI: BOLD:ACV4080

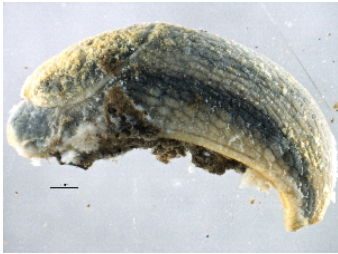

**BIOUG07961-C06 [Lateral]**  
*Arion distinctus*  
 Family: Arionidae  
 BIN URI: BOLD:AAC0783

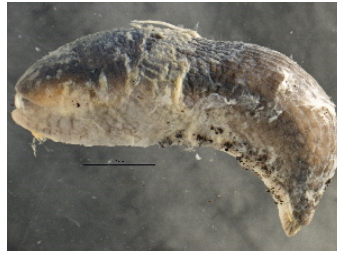

**BIOUG08048-E09 [Dorsal]**  
*Arion flagellus*  
 Family: Arionidae  
 BIN URI: BOLD:AAC0334

IMAGE NOT AVAILABLE

**BIOUG24036-E05**  
*Arion subfuscus*  
 Family: Arionidae

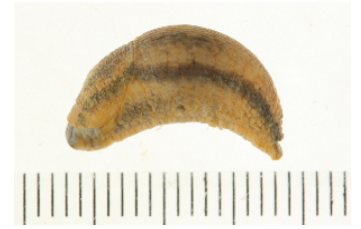

**08BBMOL-0043 [Lateral]**  
*Arion fuscus*  
 Family: Arionidae  
 BIN URI: BOLD:AAC2849

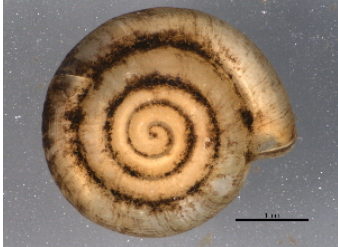

**BIOUG09922-E02 [Dorsal]**  
*Helicodiscus parallelus*  
 Family: Helicodiscidae  
 BIN URI: BOLD:AAM7935

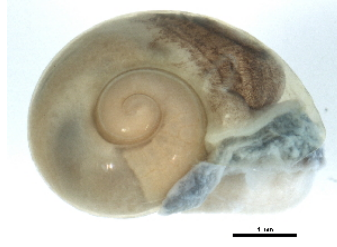

**BIOUG15235-B07 [Apical]**  
*Vitrina angelicae*  
 Family: Vitrinidae  
 BIN URI: BOLD:AAN0223

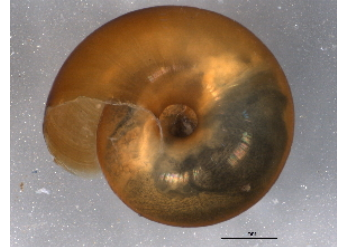

**BIOUG09921-C12 [Ventral]**  
*Zonitoides nitidus*  
 Family: Gastrodontiidae  
 BIN URI: BOLD:AAN3419

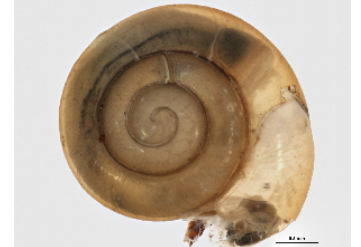

**BIOUG02457-G06 [Lateral]**  
*Zonitoides arboreus*  
 Family: Gastrodontiidae  
 BIN URI: BOLD:AAG1583

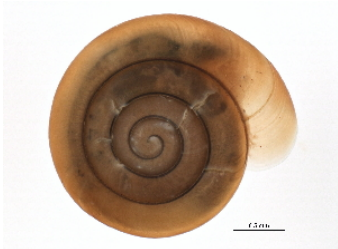

**BIOUG13626-B01 [Apical]**  
*Nesovitrea electrina*  
 Family: Zonitidae  
 BIN URI: BOLD:ACO2467

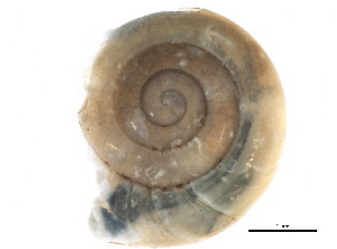

**BIOUG14152-D04 [Apical]**  
*Nesovitrea electrina*  
 Family: Zonitidae  
 BIN URI: BOLD:ACP8138

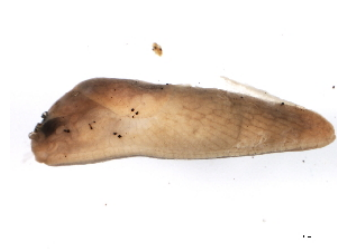

**BIOUG00775-H03 [Lateral]**  
*Deroceras reticulatum*  
 Family: Agriolimacidae  
 BIN URI: BOLD:AAI9663

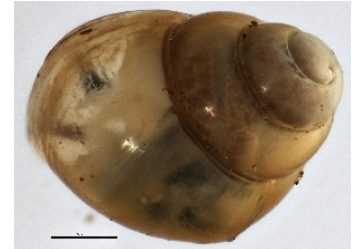

**BIOUG07961-E03 [Dorsal]**  
*Cochlicopa lubrica*  
 Family: Cochlicopidae  
 BIN URI: BOLD:AAO2419

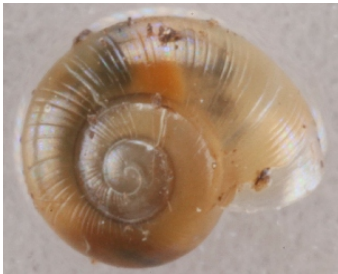

**ZMUO.019943 [Dorsal]**  
*Nesovitrea hammonis*  
 Family: Zonitidae  
 BIN URI: BOLD:ABV9664

IMAGE NOT AVAILABLE

**BIOUG24036-D07**  
*Paravitrea multidentata*  
 Family: Zonitidae

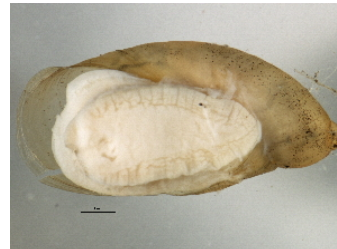

**BIOUG07961-F08 [Ventral]**  
 Succineidae  
 Family: Succineidae  
 BIN URI: BOLD:AC19370

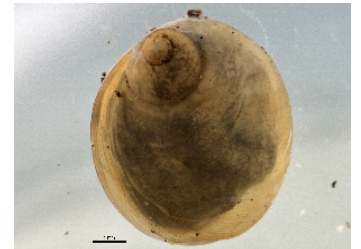

**BIOUG07961-E09 [Dorsal]**  
*Succinea putris*  
 Family: Succineidae  
 BIN URI: BOLD:AAN9260

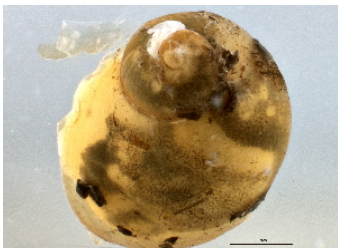

**BIOUG07961-A04 [Dorsal]**  
*Succinea putris*  
 Family: Succineidae  
 BIN URI: BOLD:AAN9260

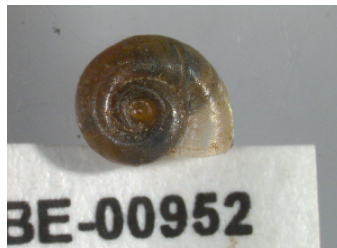

**PPM265 [Dorsal]**  
*Gyraulus circumstriatus*  
 Family: Planorbidae  
 BIN URI: BOLD:AAG1567

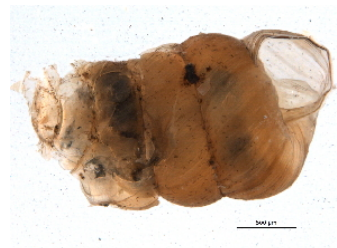

**BIOUG03707-A12 [Lateral]**  
*Columella simplex*  
 Family: Vertiginidae  
 BIN URI: BOLD:AAO2405

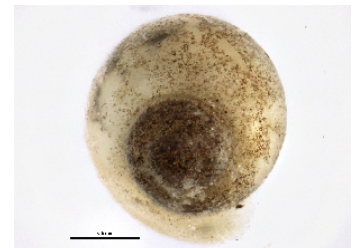

**BIOUG07961-G08 [Dorsal]**  
*Physa gyrina*  
 Family: Physidae  
 BIN URI: BOLD:ACA7323

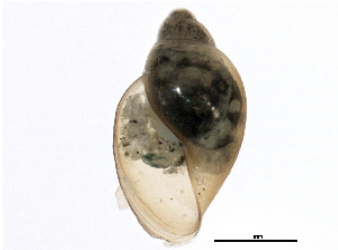

SCCWRP0039022 [Foot]  
Physa heterostropha  
Family: Physidae  
BIN URI: BOLD:AAZ1627

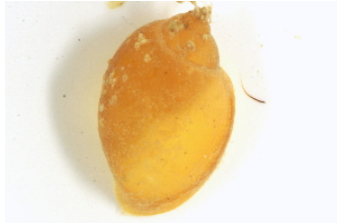

BIOUG24036-E11 [Abapertural]  
Physa  
Family: Physidae

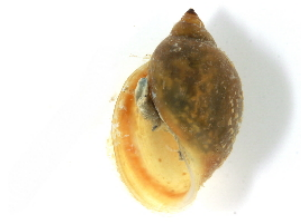

BIOUG24036-F03 [Apertural]  
Physidae  
Family: Physidae

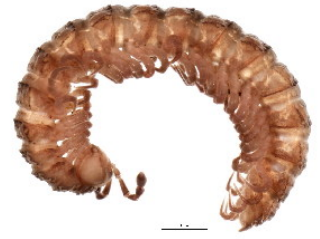

BIOUG00880-F10 [Lateral]  
Polydesmidae  
Family: Polydesmidae  
BIN URI: BOLD:AAM7947

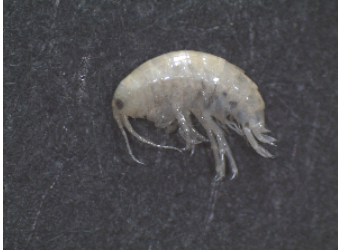

HOSO-LoWat05 [Lateral]  
Hyalella azteca  
Family: Hyalellidae  
BIN URI: BOLD:AAA1707

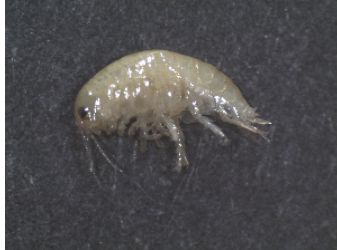

HOSO-LoWat04 [Lateral]  
Hyalella azteca  
Family: Hyalellidae  
BIN URI: BOLD:AAA1704

IMAGE NOT AVAILABLE

BIOUG24014-F03  
Hyalella azteca  
Family: Hyalellidae

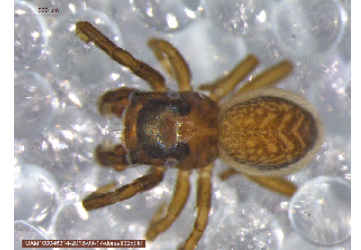

UAM:Ento:113456 [Dorsal]  
Neon reticulatus  
Family: Salticidae  
BIN URI: BOLD:AAD9221

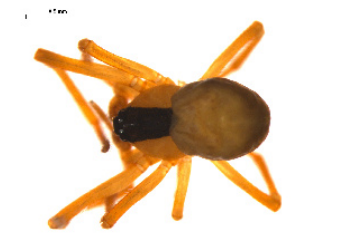

CCDB-05296-E12 [Dorsal]  
Theridula emertoni  
Family: Theridiidae  
BIN URI: BOLD:AAD2291

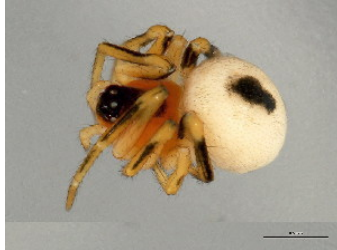

TDWG-0918 [Lateral]  
Thymoites unimaculatus  
Family: Theridiidae  
BIN URI: BOLD:AAE7853

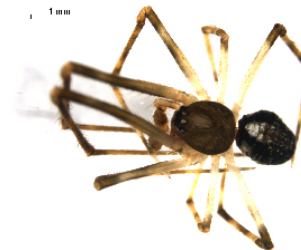

BIOUG00625-G07 [Dorsal]  
Yunohamella lyrica  
Family: Theridiidae  
BIN URI: BOLD:AAG4815

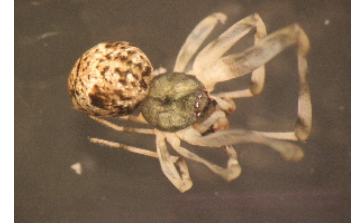

NZSPI208 [Dorsal]  
Parasteatoda tepidariorum  
Family: Theridiidae  
BIN URI: BOLD:AAC0175

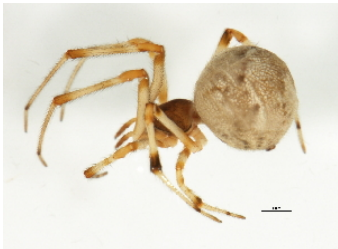

09ONTGAB-060 [Lateral]  
Parasteatoda tabulata  
Family: Theridiidae  
BIN URI: BOLD:AAC3680

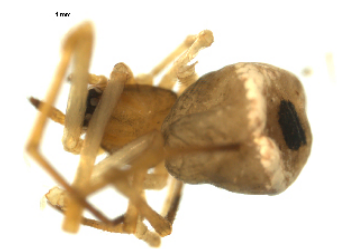

CCDB-05155-D04 [Dorsal]  
Hentziectypus globosus  
Family: Theridiidae  
BIN URI: BOLD:AAN6263

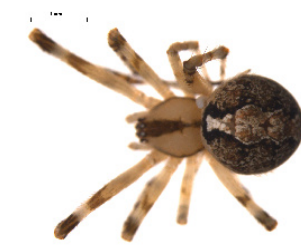

CCDB-05294-B10 [Dorsal]  
Theridion murarium  
Family: Theridiidae  
BIN URI: BOLD:AAC6350

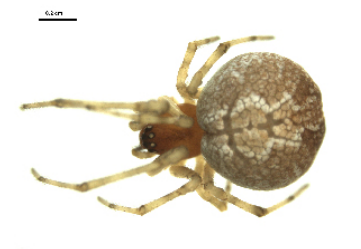

CCDB-05302-E04 [Dorsal]  
Theridion differens  
Family: Theridiidae  
BIN URI: BOLD:AAC3269

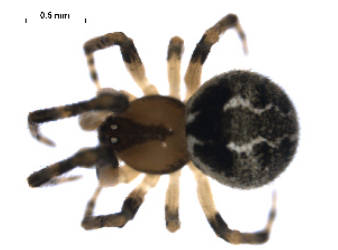

BIOUG00626-G04 [Dorsal]  
Theridion glaucescens  
Family: Theridiidae  
BIN URI: BOLD:AAG1794

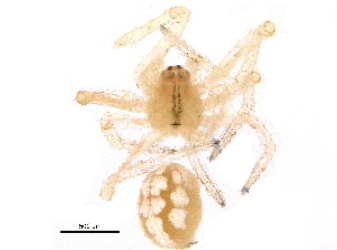

BIOUG22573-H10 [Dorsal]  
Theridion albidum  
Family: Theridiidae  
BIN URI: BOLD:AAV3042

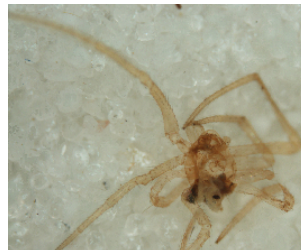

RMNH.ARA.14037 [Dorsal]  
Neottiura bimaculata  
Family: Theridiidae  
BIN URI: BOLD:AAK8332

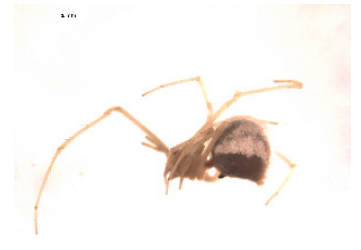

BIOUG00176-F02 [Lateral]  
Neottiura bimaculata  
Family: Theridiidae  
BIN URI: BOLD:ACN7831

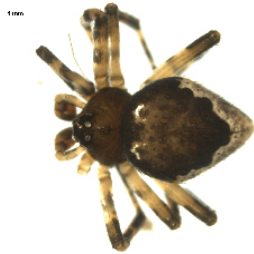

**CCDB-05155-A12 [Dorsal]**  
*Euryopis funebris*  
Family: Theridiidae  
BIN URI: BOLD:AAJ0542

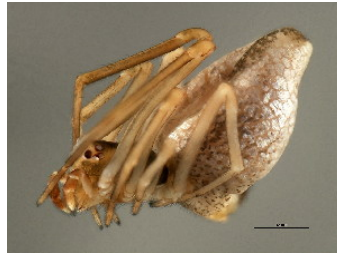

**TDWG-0927 [Lateral]**  
*Neospintharus trigonum*  
Family: Theridiidae  
BIN URI: BOLD:AAB0273

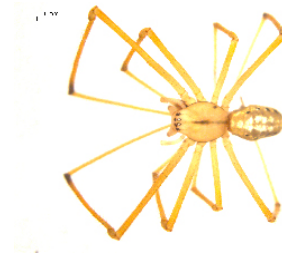

**090NTGAB-165 [Dorsal]**  
*Enoplognatha ovata*  
Family: Theridiidae  
BIN URI: BOLD:AAA6910

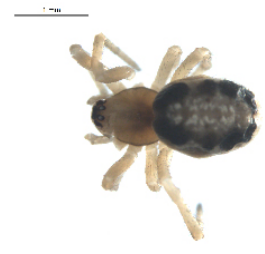

**BIOUG00623-A08 [Dorsal]**  
*Enoplognatha caricis*  
Family: Theridiidae  
BIN URI: BOLD:AAO3896

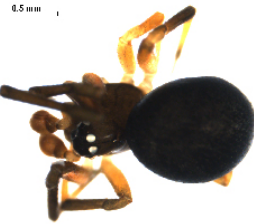

**BIOUG00625-D12 [Dorsal]**  
*Diplocephalus nigra*  
Family: Theridiidae  
BIN URI: BOLD:AAF4974

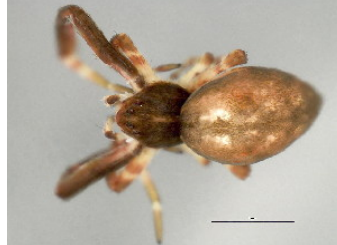

**TDWG-0922 [Dorsal]**  
*Uloborus glomosus*  
Family: Uloboridae  
BIN URI: BOLD:AAJ7823

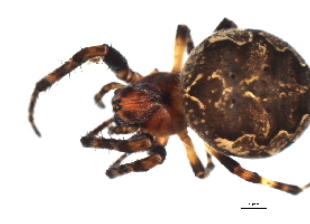

**09PROBE-01583 [Dorsal]**  
*Larinioides patagiatus*  
Family: Araneidae  
BIN URI: BOLD:AAA3681

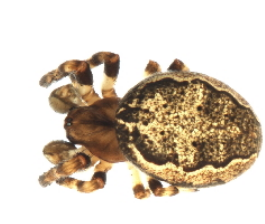

**08SOAR-0035 [Dorsal]**  
*Larinioides cornutus*  
Family: Araneidae  
BIN URI: BOLD:AAA8999

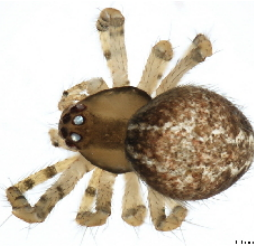

**10PHMAL-2092 [Dorsal]**  
*Eustala emertoni*  
Family: Araneidae  
BIN URI: BOLD:AAB7934

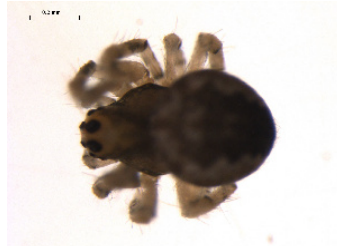

**CCDB-05307-D05 [Dorsal]**  
*Eustala cepina*  
Family: Araneidae  
BIN URI: BOLD:AAB7935

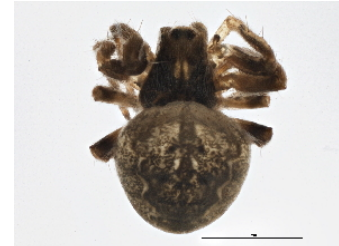

**BIOUG05713-A12 [Dorsal]**  
*Eustala anastera*  
Family: Araneidae  
BIN URI: BOLD:AAB7933

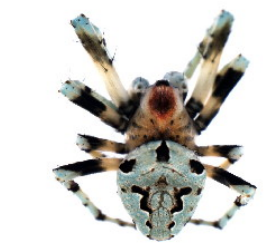

**TDWG-0975 [Dorsal]**  
*Eustala rosae*  
Family: Araneidae  
BIN URI: BOLD:AAL4913

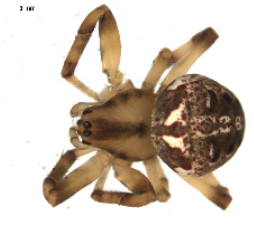

**CCDB-08516-G04 [Dorsal]**  
*Neoscona arabesca*  
Family: Araneidae  
BIN URI: BOLD:AAA4123

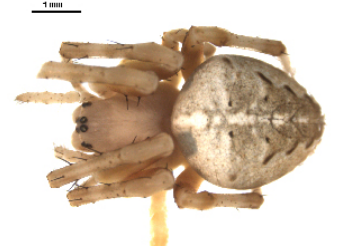

**02-KADIR-G12 [Dorsal]**  
*Araneus diadematus*  
Family: Araneidae  
BIN URI: BOLD:AAA4125

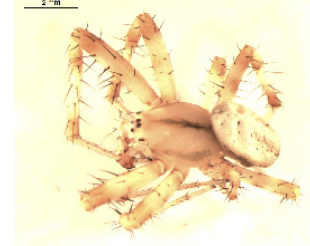

**BIOUG00524-G04 [Dorsal]**  
*Araneus trifolium*  
Family: Araneidae  
BIN URI: BOLD:AAB8544

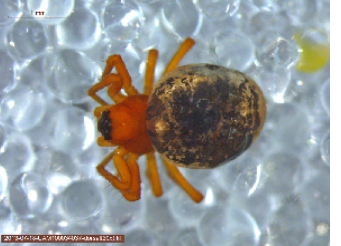

**UAM:Ento:116820 [Dorsal]**  
*Hyposisinga rubens*  
Family: Araneidae  
BIN URI: BOLD:AAN6264

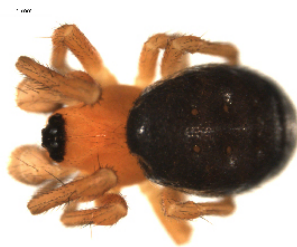

**CCDB-04290-C03 [Dorsal]**  
*Hyposisinga pygmaea*  
Family: Araneidae  
BIN URI: BOLD:ABX6180

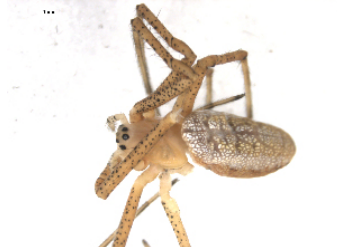

**BIOUG00163-H05 [Dorsal]**  
*Argiope trifasciata*  
Family: Araneidae  
BIN URI: BOLD:AAC3165

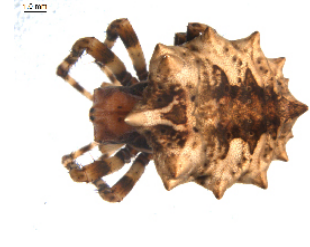

**BIOUG00039-D02 [Dorsal]**  
*Acanthepeira stellata*  
Family: Araneidae  
BIN URI: BOLD:AAD7855

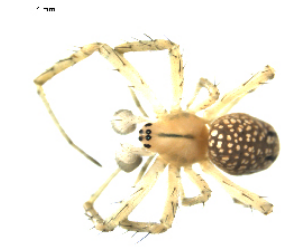

**BIOUG00616-A10 [Dorsal]**  
*Mangora gibberosa*  
Family: Araneidae  
BIN URI: BOLD:AAB7330



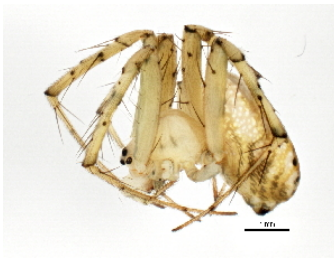

**BIOUG01966-A07 [Lateral]**  
*Mangora maculata*  
Family: Araneidae  
BIN URI: BOLD:AAK7682

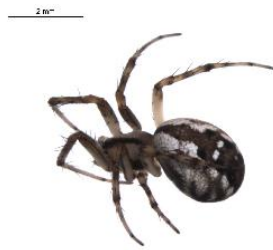

**BIOUG00886-B11 [Dorsal]**  
*Mangora placida*  
Family: Araneidae  
BIN URI: BOLD:ACE4103

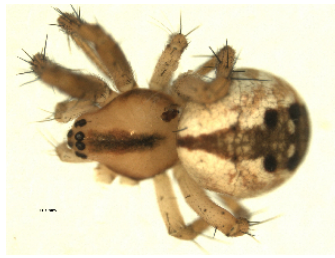

**CCDB-04359-G06 [Lateral]**  
*Mangora placida*  
Family: Araneidae  
BIN URI: BOLD:AAI4456

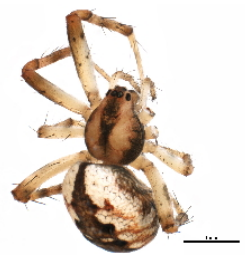

**BIOUG12203-B06 [Dorsal]**  
*Mangora placida*  
Family: Araneidae  
BIN URI: BOLD:ACJ0225

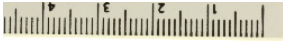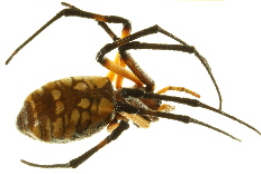

**BIOUG01961-H11 [Dorsal]**  
*Argiope aurantia*  
Family: Araneidae  
BIN URI: BOLD:AAD2601

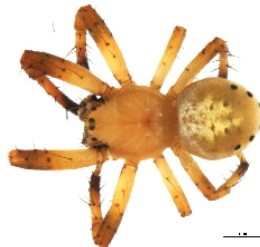

**08SOAR-0103 [Dorsal]**  
*Araniella displicata*  
Family: Araneidae  
BIN URI: BOLD:AAA8399

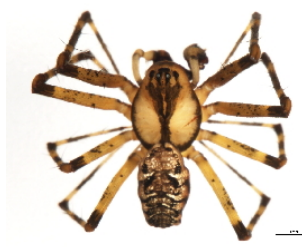

**09-PROBE-08152 [Dorsal]**  
*Pityohyphantes subarcticus*  
Family: Linyphiidae  
BIN URI: BOLD:AAA4185

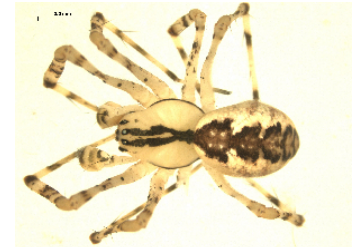

**CCDB-04359-B07 [Lateral]**  
*Pityohyphantes costatus*  
Family: Linyphiidae  
BIN URI: BOLD:AAC6457

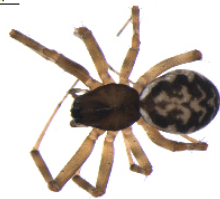

**BIOUG00889-C01 [Dorsal]**  
*Neriene clathrata*  
Family: Linyphiidae  
BIN URI: BOLD:AAA8358

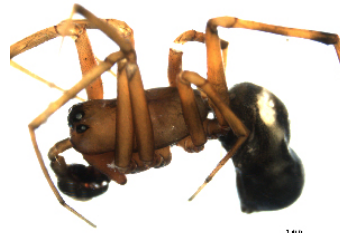

**CCDB-05259-F06 [Lateral]**  
*Neriene clathrata*  
Family: Linyphiidae  
BIN URI: BOLD:AAB7327

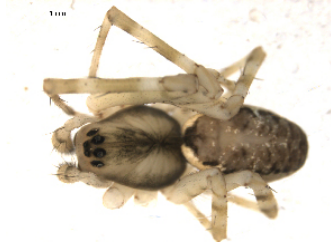

**BIOUG00040-C05 [Dorsal]**  
*Neriene montana*  
Family: Linyphiidae  
BIN URI: BOLD:AAB7328

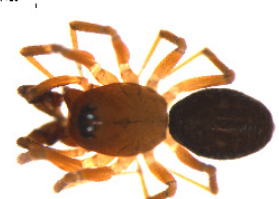

**CCDB-05303-C03 [Dorsal]**  
*Erigone autumnalis*  
Family: Linyphiidae  
BIN URI: BOLD:AAH0001

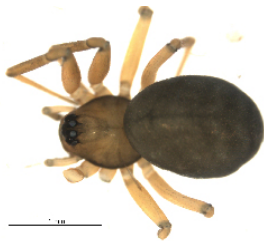

**CCDB-05149-A07 [Dorsal]**  
*Tenuiphantes zebra*  
Family: Linyphiidae  
BIN URI: BOLD:AAI8098

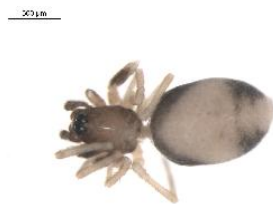

**BIOUG00886-E04 [Dorsal]**  
*Tennesseellum formica*  
Family: Linyphiidae  
BIN URI: BOLD:AAG5631

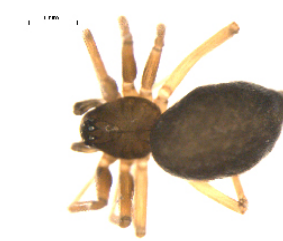

**09ONTGAB-144 [Dorsal]**  
*Agyneta unimaculata*  
Family: Linyphiidae  
BIN URI: BOLD:AAH0003

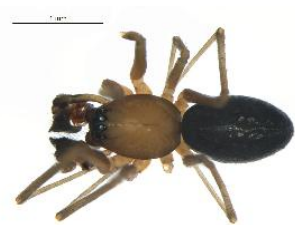

**BIOUG00632-B12 [Dorsal]**  
*Agyneta fabra*  
Family: Linyphiidae  
BIN URI: BOLD:AAE3860

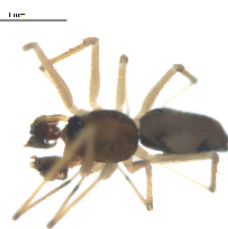

**BIOUG00623-E06 [Dorsal]**  
*Agyneta micaria*  
Family: Linyphiidae  
BIN URI: BOLD:AAN6265

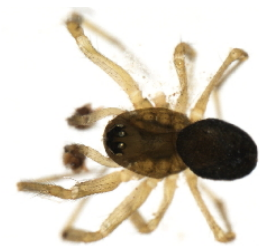

**08EARGUE-0009 [Dorsal]**  
*Mermessus trilobatus*  
Family: Linyphiidae  
BIN URI: BOLD:AAC8898

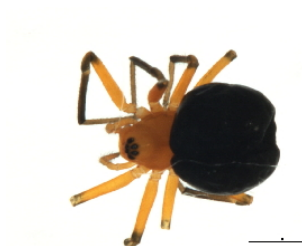

**08SOAR-0082 [Dorsal]**  
*Hypselistes florens*  
Family: Linyphiidae  
BIN URI: BOLD:AAB4233

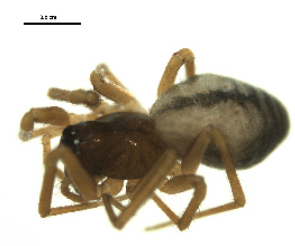

**CCDB-05302-F03 [Dorsal]**  
*Grammonota angusta*  
Family: Linyphiidae  
BIN URI: BOLD:AAD1498

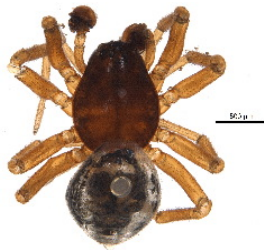

**BIOUG20599-A04 [Dorsal]**  
*Grammonota inornata*  
Family: Linyphiidae  
BIN URI: BOLD:ACV5737

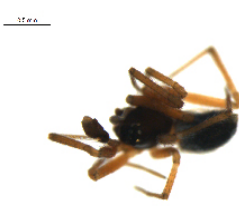

**CCDB-21418-B11 [Dorsal]**  
*Collinsia plumosa*  
Family: Linyphiidae  
BIN URI: BOLD:AAM9146

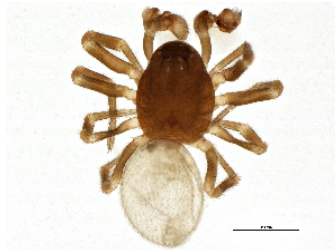

**BIOUG01654-A09 [Dorsal]**  
*Ceratinops latus*  
Family: Linyphiidae  
BIN URI: BOLD:AAI5447

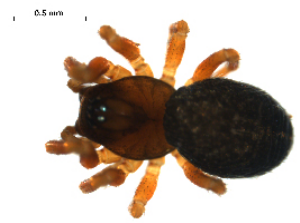

**BIOUG00616-F11 [Dorsal]**  
*Eridantes erigonoides*  
Family: Linyphiidae  
BIN URI: BOLD:AAH0004

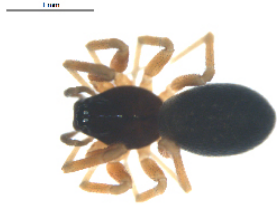

**BIOUG00622-H05 [Dorsal]**  
*Walckenaeria directa*  
Family: Linyphiidae  
BIN URI: BOLD:AAH8313

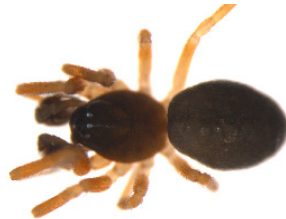

**CCDB-05303-B12 [Dorsal]**  
*Walckenaeria fallax*  
Family: Linyphiidae  
BIN URI: BOLD:AAH8314

**IMAGE NOT AVAILABLE**

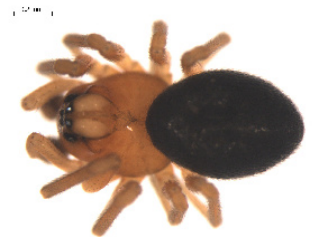

**09PROBE-932 [Dorsal]**  
*Hypomma marxi*  
Family: Linyphiidae  
BIN URI: BOLD:AAB9520

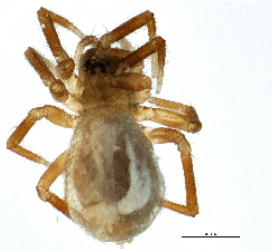

**BIOUG06316-H10 [Dorsal]**  
*Pocadicnemis americana*  
Family: Linyphiidae  
BIN URI: BOLD:AAC9060

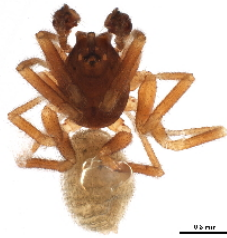

**BIOUG18633-F09 [Dorsal]**  
*Walckenaeria pinocchio*  
Family: Linyphiidae  
BIN URI: BOLD:ACT1115

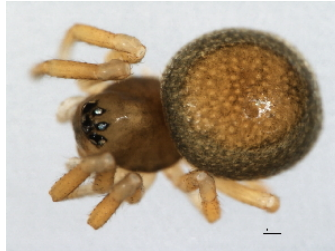

**CCDB-04552-E04 [Dorsal]**  
*Ceratinella brunnea*  
Family: Linyphiidae  
BIN URI: BOLD:AAD2101

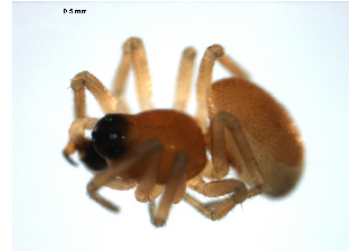

**BIOUG00616-A07 [Dorsal]**  
*Ceraticelus similis*  
Family: Linyphiidae  
BIN URI: BOLD:AAF1318

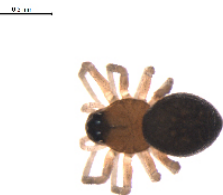

**BIOUG00635-B04 [Dorsal]**  
*Ceraticelus atriceps*  
Family: Linyphiidae  
BIN URI: BOLD:AAI3701

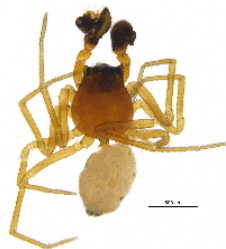

**BIOUG17140-B08 [Dorsal]**  
*Ceratinopsis auriculata*  
Family: Linyphiidae  
BIN URI: BOLD:ACR6338

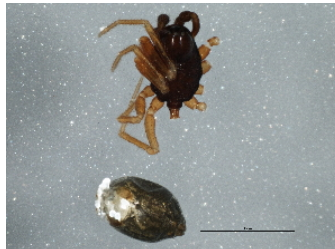

**BIOUG05512-B09 [Dorsal]**  
*Ceratinops crenatus*  
Family: Linyphiidae  
BIN URI: BOLD:ACF8798

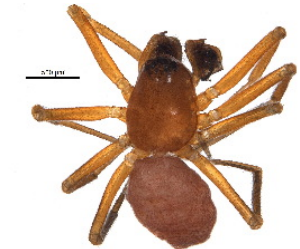

**BIOUG20597-D10 [Dorsal]**  
*Ceratinopsis labradorensis*  
Family: Linyphiidae  
BIN URI: BOLD:ACV5182

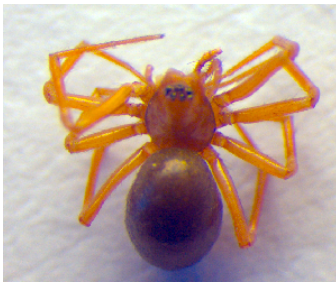

**BC ZSM ARA 00186 [Dorsal]**  
*Centromerus sylvaticus*  
 Family: Linyphiidae  
 BIN URI: BOLD:AAA4132

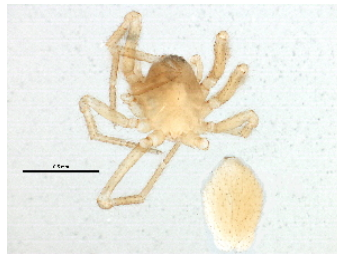

**BIOUG10076-G09 [Dorsal]**  
*Mermessus index*  
 Family: Linyphiidae  
 BIN URI: BOLD:ACL4554

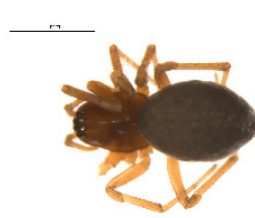

**BIOUG14290-B04 [Dorsal]**  
*Erigone blaesae*  
 Family: Linyphiidae  
 BIN URI: BOLD:ACE9601

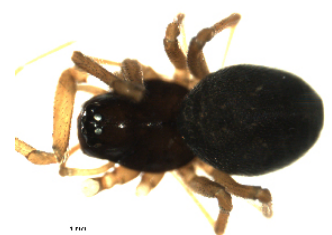

**CCDB-05259-G11 [Dorsal]**  
*Erigone atra*  
 Family: Linyphiidae  
 BIN URI: BOLD:ACE5877

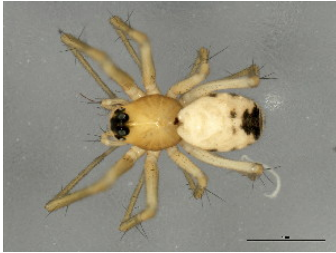

**TDWG-0900 [Dorsal]**  
*Neriene variabilis*  
 Family: Linyphiidae  
 BIN URI: BOLD:AAE5990

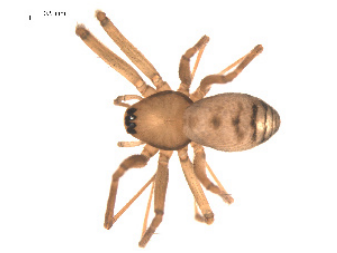

**09PROBE-873 [Dorsal]**  
*Bathypantes brevis*  
 Family: Linyphiidae  
 BIN URI: BOLD:AAC5851

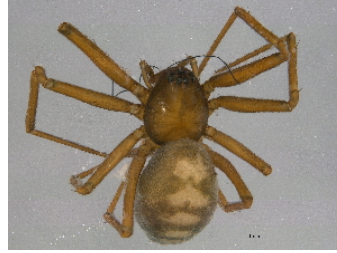

**BIOUG06190-C12 [Dorsal]**  
*Bathypantes pallidus*  
 Family: Linyphiidae  
 BIN URI: BOLD:AAC9112

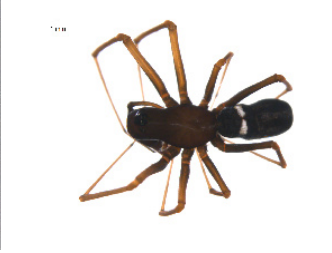

**BIOUG09848-G11 [Dorsal]**  
*Microlinyphia mandibulata*  
 Family: Linyphiidae  
 BIN URI: BOLD:AAF4994

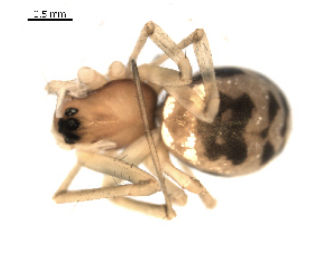

**BIOUG00519-E01 [Dorsal]**  
*Microlinyphia mandibulata*  
 Family: Linyphiidae  
 BIN URI: BOLD:AAG9557

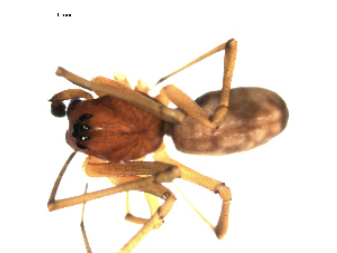

**CCDB-05292-C03 [Dorsal]**  
*Frontinella communis*  
 Family: Linyphiidae  
 BIN URI: BOLD:AAE0825

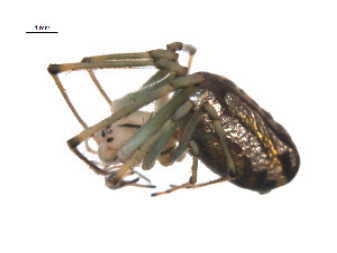

**BIOUG12606-C03 [Dorsal]**  
*Leucauge venusta*  
 Family: Tetragnathidae  
 BIN URI: BOLD:AAB8714

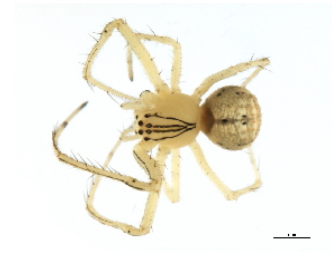

**08BBARAC-0006 [Dorsal]**  
*Mimetus epeiroides*  
 Family: Mimetidae  
 BIN URI: BOLD:AAG5658

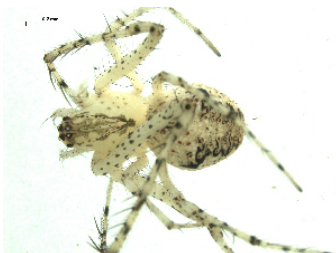

**CCDB-04289-A12 [Dorsal]**  
*Mimetus notius*  
 Family: Mimetidae  
 BIN URI: BOLD:AAE0114

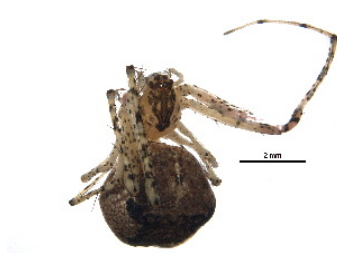

**BIOUG20596-A02 [Dorsal]**  
*Mimetus haynesi*  
 Family: Mimetidae  
 BIN URI: BOLD:AAK6284

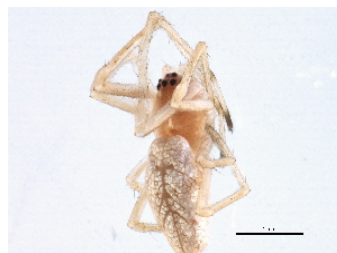

**BIOUG08040-F06 [Dorsal]**  
*Tetragnatha shoshone*  
 Family: Tetragnathidae  
 BIN URI: BOLD:ACN2094

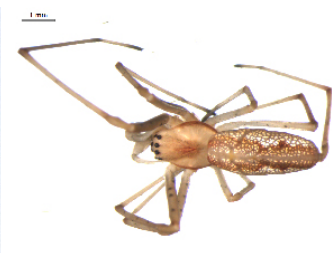

**BIOUG00521-F06 [Dorsal]**  
*Tetragnatha shoshone*  
 Family: Tetragnathidae  
 BIN URI: BOLD:ACN2276

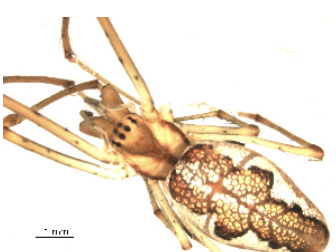

**BIOUG00517-A03 [Dorsal]**  
*Tetragnatha shoshone*  
 Family: Tetragnathidae  
 BIN URI: BOLD:ACN2438

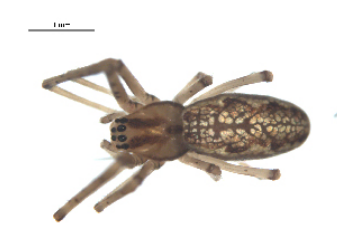

**BIOUG00622-G04 [Dorsal]**  
*Tetragnatha versicolor*  
 Family: Tetragnathidae  
 BIN URI: BOLD:AAB7995

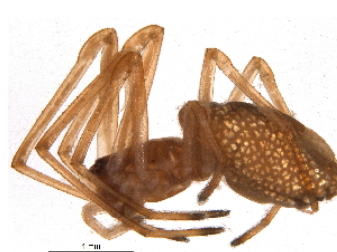

**BIOUG16052-H01 [Lateral]**  
*Tetragnatha shoshone*  
 Family: Tetragnathidae  
 BIN URI: BOLD:ACP7708

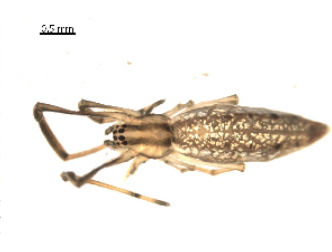

**BIOUG00519-D08 [Dorsal]**  
*Tetragnatha caudata*  
 Family: Tetragnathidae  
 BIN URI: BOLD:AAP3715

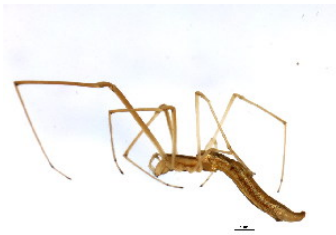

**08BBARAC-0377 [Lateral]**  
*Tetragnatha caudata*  
 Family: Tetragnathidae  
 BIN URI: BOLD:AAE3958

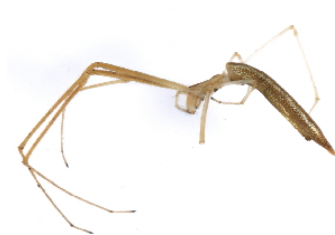

**08BBARAC-0105 [Lateral]**  
*Tetragnatha caudata*  
 Family: Tetragnathidae  
 BIN URI: BOLD:ACN4034

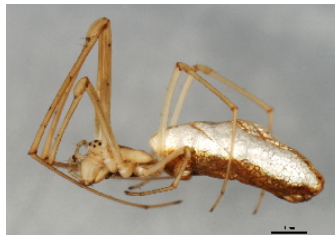

**CCDB-04551-F10 [Lateral]**  
*Tetragnatha laboriosa*  
 Family: Tetragnathidae  
 BIN URI: BOLD:AAA6383

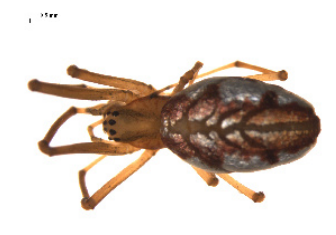

**CCDB-05296-H04 [Dorsal]**  
*Tetragnatha laboriosa*  
 Family: Tetragnathidae  
 BIN URI: BOLD:AAA6381

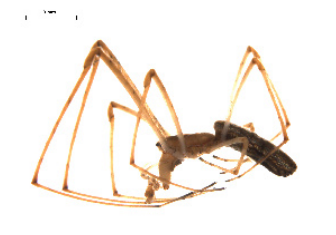

**CCDB-05305-H11 [Lateral]**  
*Tetragnatha laboriosa*  
 Family: Tetragnathidae  
 BIN URI: BOLD:ACR6860

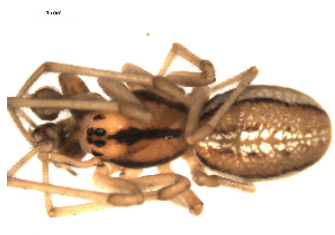

**CCDB-04290-D09 [Dorsal]**  
*Pachygnatha tristriata*  
 Family: Tetragnathidae  
 BIN URI: BOLD:AAF1571

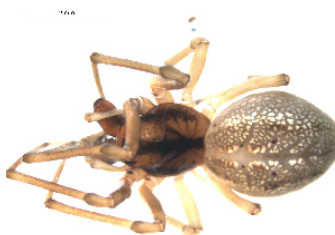

**CCDB-04290-H10 [Dorsal]**  
*Pachygnatha dorothea*  
 Family: Tetragnathidae  
 BIN URI: BOLD:AAE5304

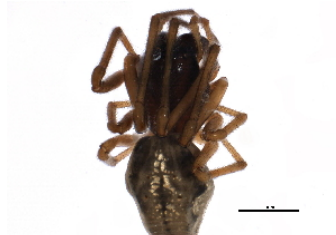

**BIOUG14249-H01 [Dorsal]**  
*Pachygnatha xanthostoma*  
 Family: Tetragnathidae  
 BIN URI: BOLD:AC07247

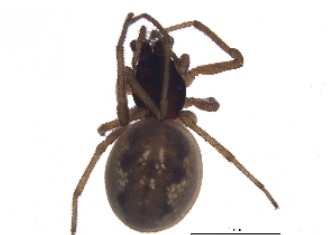

**BIOUG13984-H01 [Dorsal]**  
*Pachygnatha xanthostoma*  
 Family: Tetragnathidae  
 BIN URI: BOLD:ACP5884

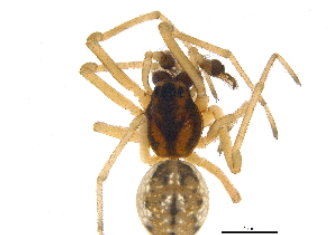

**BIOUG20041-D11 [Dorsal]**  
*Pachygnatha xanthostoma*  
 Family: Tetragnathidae  
 BIN URI: BOLD:ACU5364

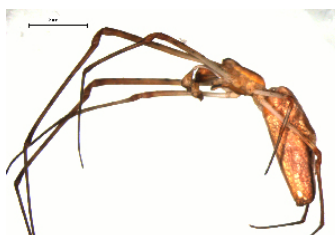

**01-BB09US-D08 [Lateral]**  
*Tetragnatha guatemalensis*  
 Family: Tetragnathidae  
 BIN URI: BOLD:AAC6596

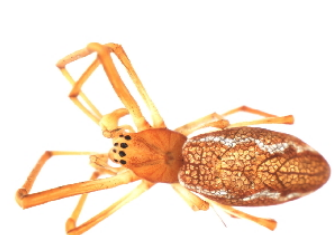

**10PROBE-21174 [Dorsal]**  
*Tetragnatha extensa*  
 Family: Tetragnathidae  
 BIN URI: BOLD:AAA4940

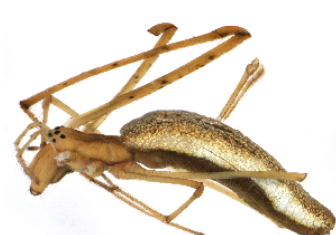

**BIOUG05803-G12 [Lateral]**  
*Tetragnatha straminea*  
 Family: Tetragnathidae  
 BIN URI: BOLD:AAD7095

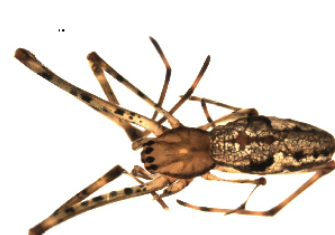

**CCDB-05292-A01 [Dorsal]**  
*Tetragnatha viridis*  
 Family: Tetragnathidae  
 BIN URI: BOLD:AAG5659

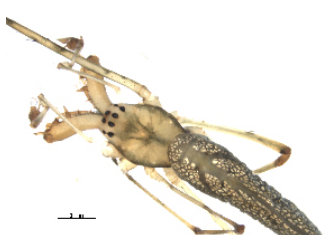

**CCDB-08519-B02 [Dorsal]**  
*Tetragnatha viridis*  
 Family: Tetragnathidae  
 BIN URI: BOLD:AAN6335

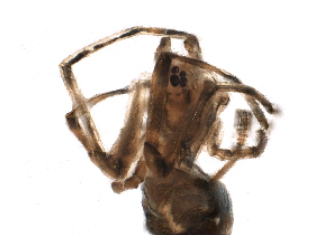

**BIOUG12563-C10 [Dorsal]**  
*Tetragnatha viridis*  
 Family: Tetragnathidae  
 BIN URI: BOLD:ACN5503

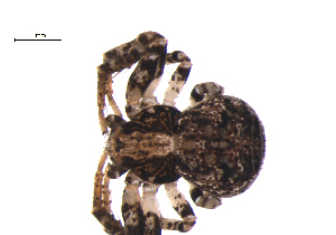

**BIOUG00889-H07 [Dorsal]**  
*Ozyptila praticola*  
 Family: Thomisidae  
 BIN URI: BOLD:AAC7413

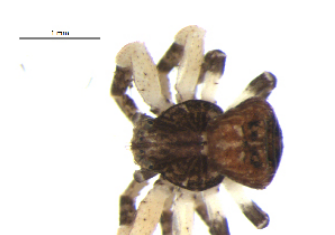

**BIOUG00619-A07 [Dorsal]**  
*Ozyptila americana*  
 Family: Thomisidae  
 BIN URI: BOLD:AAV1641

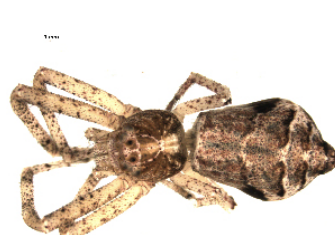

**CCDB-05292-A04 [Dorsal]**  
*Tmarus angulatus*  
 Family: Thomisidae  
 BIN URI: BOLD:ABY7475

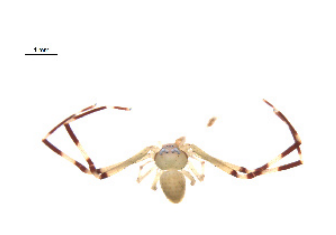

**BIOUG12606-B08 [Dorsal]**  
*Misumessus oblongus*  
 Family: Thomisidae  
 BIN URI: BOLD:AAA8847

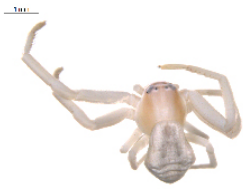

**BIOUG12606-G08 [Dorsal]**  
*Misumenoides formosipes*  
Family: Thomisidae  
BIN URI: BOLD:AAE9994

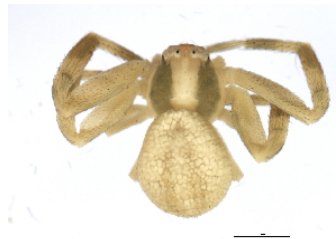

**08BBARAC-0322 [Dorsal]**  
*Misumena vatia*  
Family: Thomisidae  
BIN URI: BOLD:AAA6275

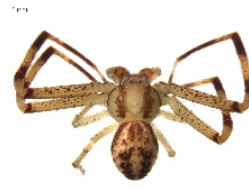

**BIOUG12604-E02 [Dorsal]**  
*Mecaphesa asperata*  
Family: Thomisidae  
BIN URI: BOLD:ACE7683

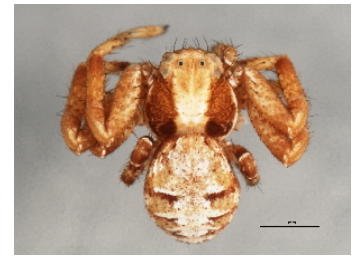

**CCDB-04551-C01 [Dorsal]**  
*Xysticus punctatus*  
Family: Thomisidae  
BIN URI: BOLD:AAD2346

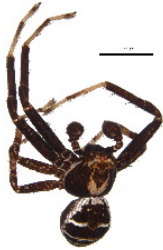

**BIOUG22090-H01 [Dorsal]**  
*Xysticus winnipegensis*  
Family: Thomisidae  
BIN URI: BOLD:AAM6956

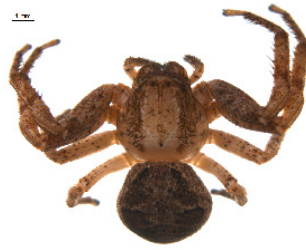

**BIOUG12605-A11 [Dorsal]**  
*Xysticus elegans*  
Family: Thomisidae  
BIN URI: BOLD:AAC1568

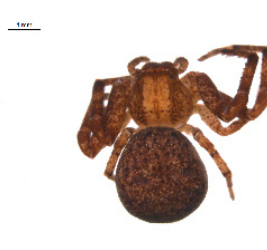

**BIOUG12606-A06 [Dorsal]**  
*Xysticus funestus*  
Family: Thomisidae  
BIN URI: BOLD:AAC1600

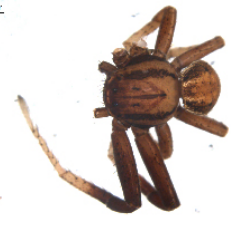

**BIOUG00039-D01 [Dorsal]**  
*Xysticus luctans*  
Family: Thomisidae  
BIN URI: BOLD:AAF8190

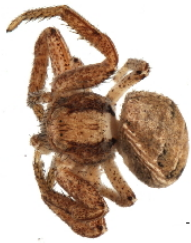

**08EARGUE-0052 [Dorsal]**  
*Xysticus emertoni*  
Family: Thomisidae  
BIN URI: BOLD:AAB4300

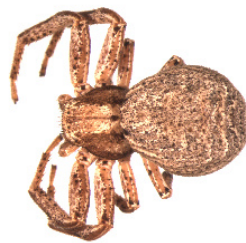

**BIOUG00162-D01 [Dorsal]**  
*Xysticus bicuspis*  
Family: Thomisidae  
BIN URI: BOLD:AAJ9685

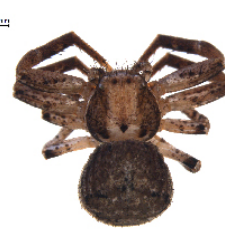

**BIOUG07169-A04 [Dorsal]**  
*Xysticus discursans*  
Family: Thomisidae  
BIN URI: BOLD:AAJ9718

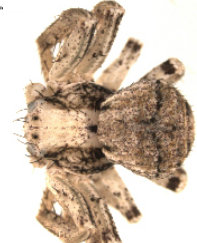

**CCDB-04290-C11 [Dorsal]**  
*Xysticus discursans*  
Family: Thomisidae  
BIN URI: BOLD:ACV2014

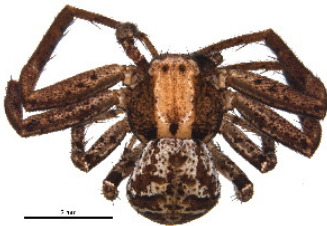

**BIOUG20598-B09 [Dorsal]**  
*Xysticus discursans*  
Family: Thomisidae  
BIN URI: BOLD:ACV5078

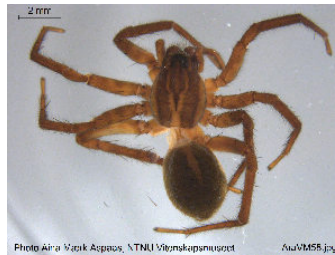

**AraVM58 [Dorsal]**  
*Pirata piraticus*  
Family: Lycosidae  
BIN URI: BOLD:AAB6784

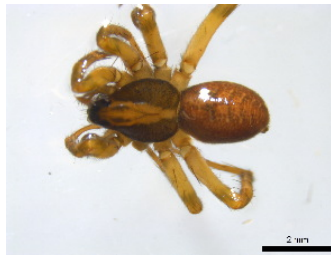

**BIOUG09324-G11 [Dorsal]**  
*Pirata praedo*  
Family: Lycosidae  
BIN URI: BOLD:AAC5349

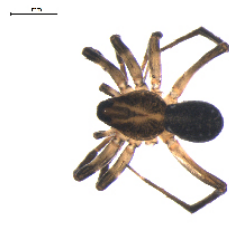

**BIOUG00889-E03 [Dorsal]**  
*Piratula minuta*  
Family: Lycosidae  
BIN URI: BOLD:AAE4247

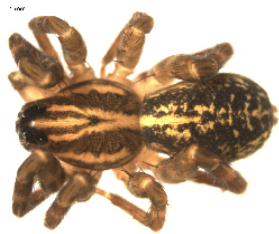

**CCDB-04290-D11 [Dorsal]**  
*Piratula cantralli*  
Family: Lycosidae  
BIN URI: BOLD:ABZ5613

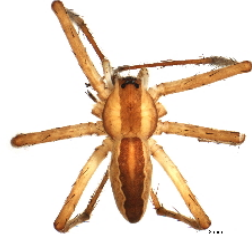

**BIOUG14847-H09 [Dorsal]**  
*Pisaurina mira*  
Family: Pisauridae  
BIN URI: BOLD:AAI2721

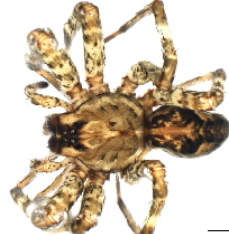

**08OEC-020 [Dorsal]**  
*Dolomedes tenebrosus*  
Family: Pisauridae  
BIN URI: BOLD:AAC7517

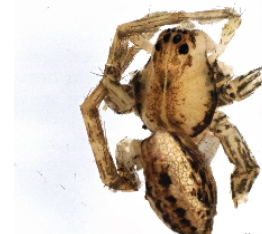

**BIOUG06212-G12 [Dorsal]**  
*Dolomedes vittatus*  
Family: Pisauridae  
BIN URI: BOLD:ACI5773

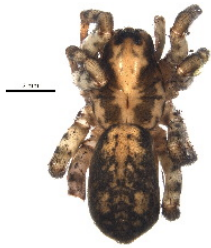

**BIOUG20596-B07 [Dorsal]**  
*Arctosa emertoni*  
 Family: Lycosidae  
 BIN URI: BOLD:ACW1682

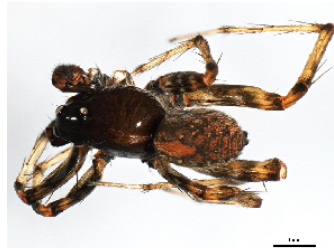

**10PHMAL-1973 [Dorsal]**  
*Pardosa moesta*  
 Family: Lycosidae  
 BIN URI: BOLD:AAB0863

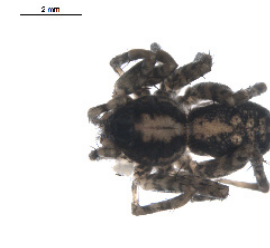

**BIOUG00886-A08 [Dorsal]**  
*Pardosa milvina*  
 Family: Lycosidae  
 BIN URI: BOLD:AAB7668

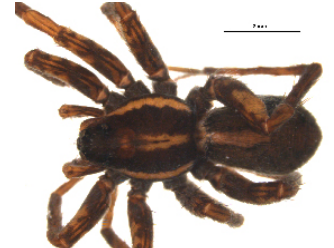

**01WOLF-H05 [Dorsal]**  
*Pardosa furcifera*  
 Family: Lycosidae  
 BIN URI: BOLD:AAA5090

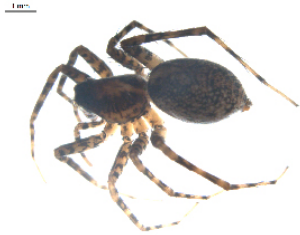

**BIOUG00617-D02 [Dorsal]**  
*Pardosa saxatilis*  
 Family: Lycosidae  
 BIN URI: BOLD:AAB7667

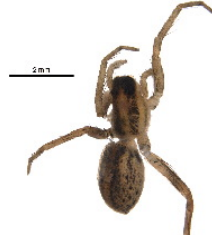

**BIOUG22090-H03 [Dorsal]**  
*Pardosa distincta*  
 Family: Lycosidae  
 BIN URI: BOLD:AAC7802

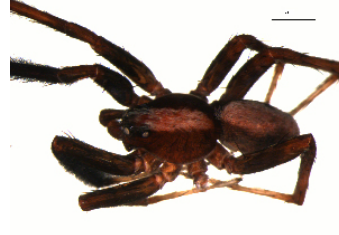

**01-BB09US-A06 [Dorsal]**  
*Schizocosa ocreata*  
 Family: Lycosidae  
 BIN URI: BOLD:AAA7232

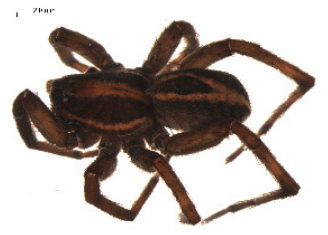

**09ONTGAB-141 [Dorsal]**  
*Schizocosa avida*  
 Family: Lycosidae  
 BIN URI: BOLD:AAD3880

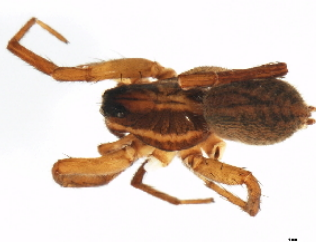

**09EARGUE-0162 [Dorsal]**  
*Schizocosa crassipalata*  
 Family: Lycosidae  
 BIN URI: BOLD:AAC4687

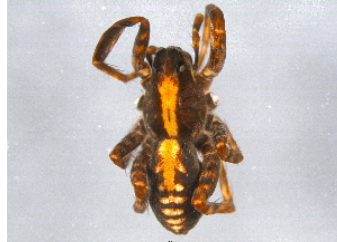

**BIOUG05537-B06 [Lateral]**  
*Schizocosa mccoeki*  
 Family: Lycosidae  
 BIN URI: BOLD:AAH0055

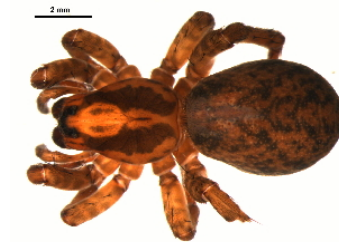

**BGSPI-03-H07 [Dorsal]**  
*Trochosa terricola*  
 Family: Lycosidae  
 BIN URI: BOLD:AAB0727

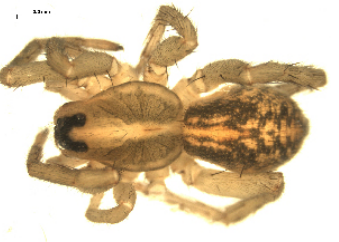

**CCDB-04359-A03 [Lateral]**  
*Trochosa ruficola*  
 Family: Lycosidae  
 BIN URI: BOLD:AAB0726

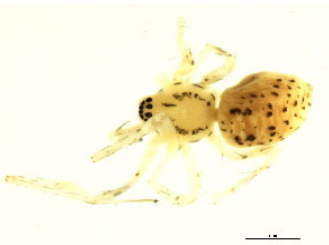

**08BBARAC-0013 [Dorsal]**  
*Wulfila saltabundus*  
 Family: Anyphaenidae  
 BIN URI: BOLD:AAC6924

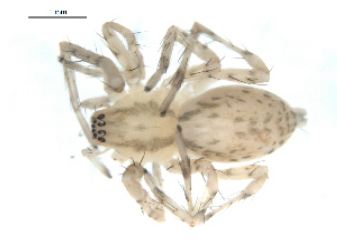

**BIOUG00622-C09 [Dorsal]**  
*Anyphaena pectorosa*  
 Family: Anyphaenidae  
 BIN URI: BOLD:AAD6926

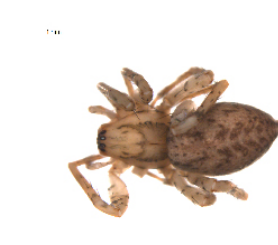

**BIOUG09848-E10 [Dorsal]**  
*Anyphaena celer*  
 Family: Anyphaenidae  
 BIN URI: BOLD:AAK1749

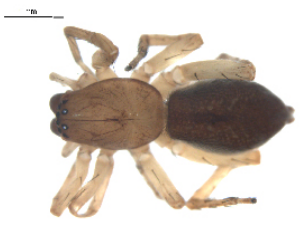

**BIOUG00627-H11 [Dorsal]**  
*Clubiona bryantae*  
 Family: Clubionidae  
 BIN URI: BOLD:AAG5664

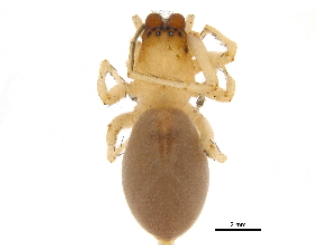

**BIOUG22567-H10 [Dorsal]**  
*Clubiona obesa*  
 Family: Clubionidae  
 BIN URI: BOLD:AAD5417

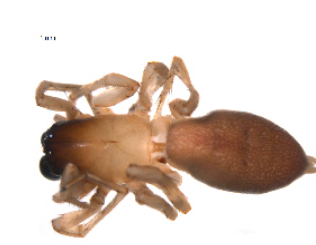

**BIOUG09848-F08 [Dorsal]**  
*Clubiona maritima*  
 Family: Clubionidae  
 BIN URI: BOLD:AAI4085

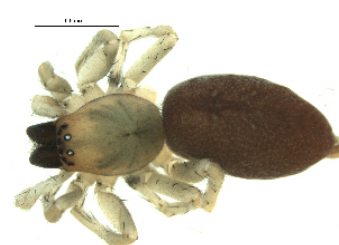

**01ARONT-H08 [Dorsal]**  
*Clubiona pallidula*  
 Family: Clubionidae  
 BIN URI: BOLD:AAI4087

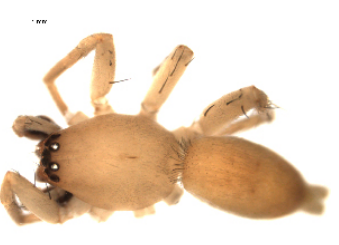

**CCDB-05156-G08 [Dorsal]**  
*Clubiona johnsoni*  
 Family: Clubionidae  
 BIN URI: BOLD:AAI4847

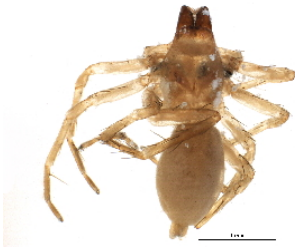

**BIOUG22358-D01 [Dorsal]**  
*Clubiona abboti*  
 Family: Clubionidae  
 BIN URI: BOLD: AAD1564

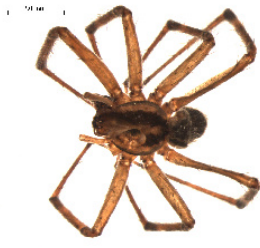

**090NTGAB-132 [Dorsal]**  
*Agelenopsis potteri*  
 Family: Agelenidae  
 BIN URI: BOLD: AAB5726

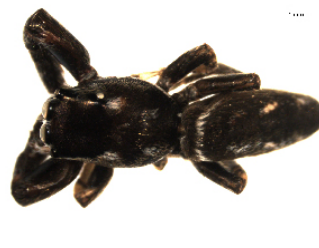

**CCDB-05292-E04 [Dorsal]**  
*Marpissa formosa*  
 Family: Salticidae  
 BIN URI: BOLD: AAG0312

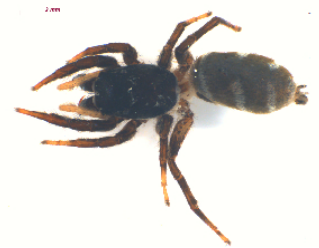

**10-SKBC-0673 [Dorsal]**  
*Salticus scenicus*  
 Family: Salticidae  
 BIN URI: BOLD: AAC9044

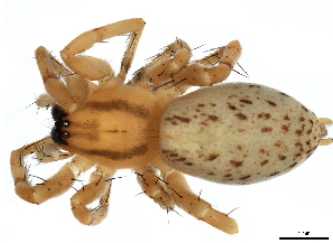

**10PHMAL-2088 [Dorsal]**  
*Hibana gracilis*  
 Family: Anyphaenidae  
 BIN URI: BOLD: AAN6394

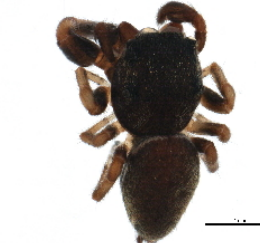

**BIOUG12604-G11 [Dorsal]**  
*Zygoballus nervosus*  
 Family: Salticidae  
 BIN URI: BOLD: ACA1490

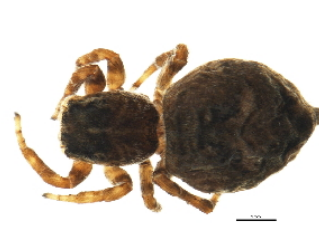

**090NTGAB-073 [Dorsal]**  
*Sitticus floricola palustris*  
 Family: Salticidae  
 BIN URI: BOLD: AAE1303

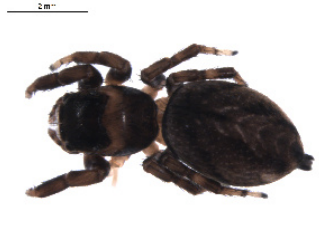

**BIOUG00886-A09 [Dorsal]**  
*Evarcha hoyi*  
 Family: Salticidae  
 BIN URI: BOLD: AAC0342

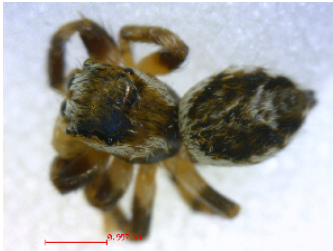

**BIOUG02680-F06 [Dorsal]**  
*Evarcha hoyi*  
 Family: Salticidae  
 BIN URI: BOLD: ACL8050

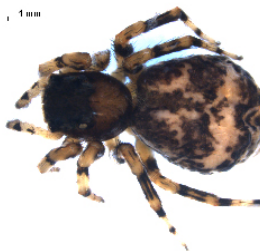

**BIOUG00626-A04 [Dorsal]**  
*Naphys pulex*  
 Family: Salticidae  
 BIN URI: BOLD: AAC2433

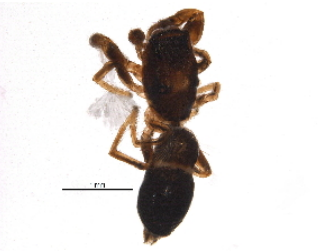

**BIOUG10643-H02 [Dorsal]**  
*Synageles noxiosus*  
 Family: Salticidae  
 BIN URI: BOLD: ACL8115

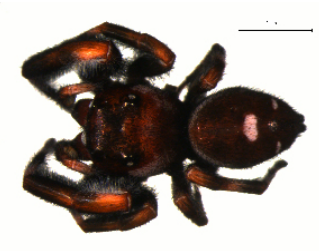

**01-BB09US-C08 [Dorsal]**  
*Phidippus audax*  
 Family: Salticidae  
 BIN URI: BOLD: AAC6891

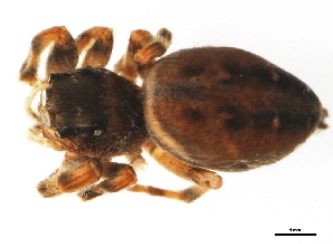

**090NTGAB-068 [Dorsal]**  
*Phidippus clarus*  
 Family: Salticidae  
 BIN URI: BOLD: AAC8083

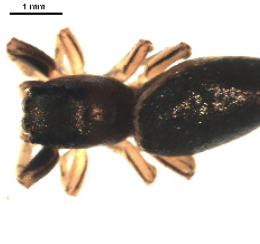

**BIOUG00619-H01 [Dorsal]**  
*Tutelina similis*  
 Family: Salticidae  
 BIN URI: BOLD: AAF6387

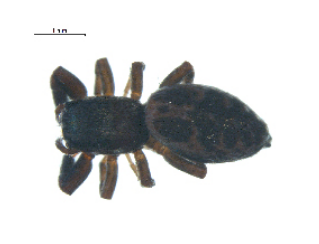

**BIOUG07161-G05 [Dorsal]**  
*Tutelina harti*  
 Family: Salticidae  
 BIN URI: BOLD: AAW8769

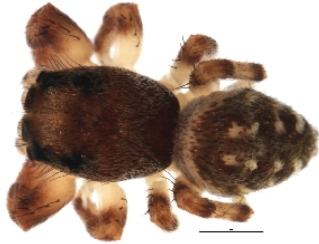

**08BBARAC-0352 [Dorsal]**  
*Eris militaris*  
 Family: Salticidae  
 BIN URI: BOLD: AAA5654

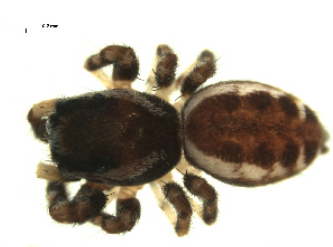

**CCDB-04289-B12 [Dorsal]**  
*Pelegrina proterva*  
 Family: Salticidae  
 BIN URI: BOLD: AAB2927

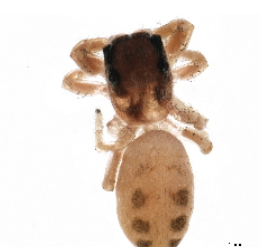

**BIOUG07914-C03 [Dorsal]**  
*Pelegrina proterva*  
 Family: Salticidae  
 BIN URI: BOLD: ACI9841

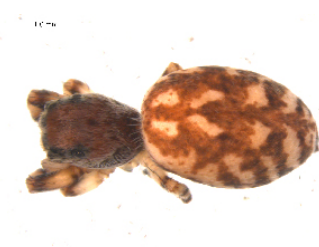

**CCDB-08512-C11 [Dorsal]**  
*Pelegrina galathea*  
 Family: Salticidae  
 BIN URI: BOLD: AAB2930

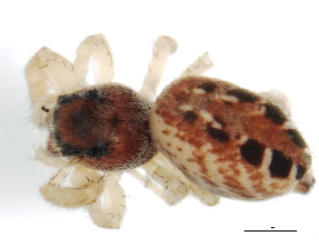

**090NTGAB-019 [Dorsal]**  
*Pelegrina insignis*  
 Family: Salticidae  
 BIN URI: BOLD: AAB2928

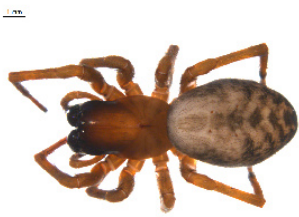

**BIOUG12605-B10 [Dorsal]**  
Callobius bennetti  
Family: Amaurobiidae  
BIN URI: BOLD:AAB8212

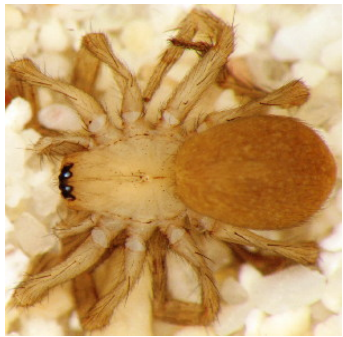

**HF-2010-119pm [Dorsal]**  
Cicurina pallida  
Family: Dictynidae  
BIN URI: BOLD:AAF3046

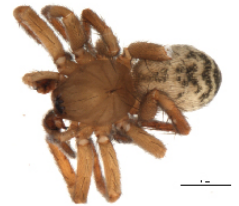

**08EARGUE-0144 [Dorsal]**  
Cicurina itasca  
Family: Dictynidae  
BIN URI: BOLD:AAI4031

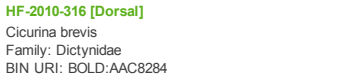

**HF-2010-316 [Dorsal]**  
Cicurina brevis  
Family: Dictynidae  
BIN URI: BOLD:AAC8284

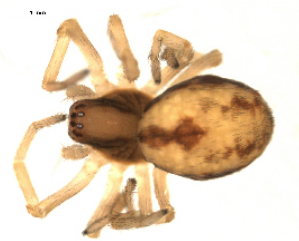

**CCDB-04290-C06 [Dorsal]**  
Emblyna manitoba  
Family: Dictynidae  
BIN URI: BOLD:AAI9209

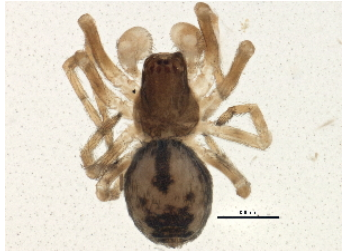

**BIOUG05539-G09 [Dorsal]**  
Emblyna hentzi  
Family: Dictynidae  
BIN URI: BOLD:AAI6251

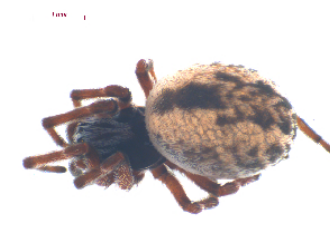

**10-SKBC-0471 [Dorsal]**  
Dictyna volucripes  
Family: Dictynidae  
BIN URI: BOLD:AAB1638

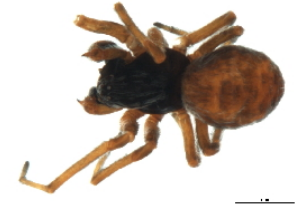

**08BBARAC-0004 [Dorsal]**  
Dictyna volucripes  
Family: Dictynidae  
BIN URI: BOLD:ACE2869

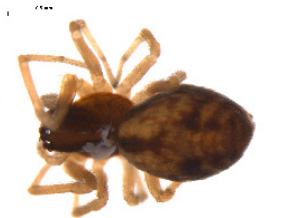

**CCDB-05295-D09 [Dorsal]**  
Dictyna bellans  
Family: Dictynidae  
BIN URI: BOLD:AAI6249

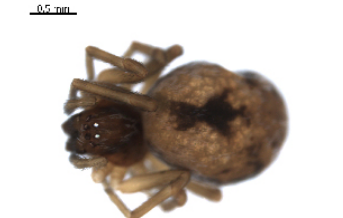

**BIOUG00518-A05 [Dorsal]**  
Dictyna brevitarsa  
Family: Dictynidae  
BIN URI: BOLD:AAB2306

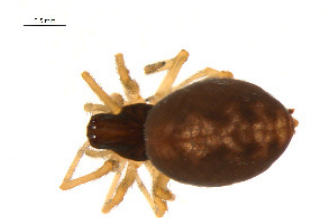

**BIOUG12607-B01 [Dorsal]**  
Dictyna foliacea  
Family: Dictynidae  
BIN URI: BOLD:AAI6247

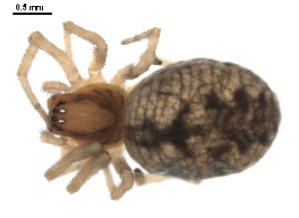

**BIOUG00615-H04 [Dorsal]**  
Dictyna bostoniensis  
Family: Dictynidae  
BIN URI: BOLD:AAL1061

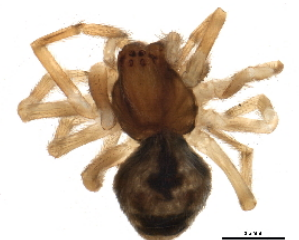

**BIOUG01955-E04 [Dorsal]**  
Emblyna annulipes  
Family: Dictynidae  
BIN URI: BOLD:AAB4733

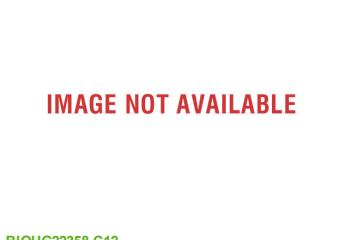

**BIOUG22358-C12**  
Emblyna sublata  
Family: Dictynidae

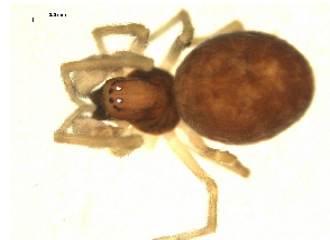

**CCDB-04359-D02 [Lateral]**  
Emblyna sublata  
Family: Dictynidae  
BIN URI: BOLD:AAA7272

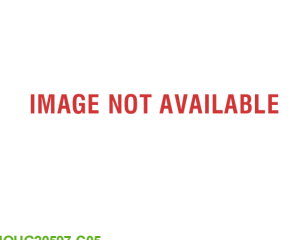

**BIOUG20597-C05**  
Emblyna sublata  
Family: Dictynidae



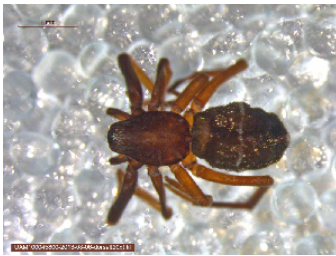

**UAM:Ento:108356 [Dorsal]**  
*Micaria pulicaria*  
 Family: Gnaphosidae  
 BIN URI: BOLD:AAC6612

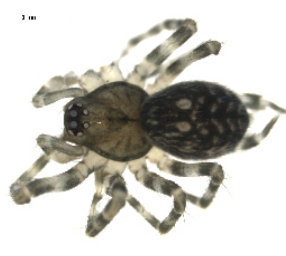

**CCDB-08501-F08 [Dorsal]**  
*Neoantistea gosiuta*  
 Family: Hahnidae  
 BIN URI: BOLD:AAG9583

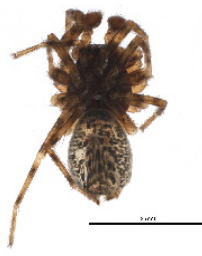

**BIOUG20599-E03 [Dorsal]**  
*Neoantistea agilis*  
 Family: Hahnidae  
 BIN URI: BOLD:ACV5090

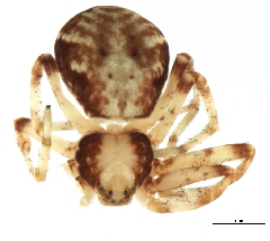

**08SOAR-0097 [Dorsal]**  
*Philodromus cespitum*  
 Family: Philodromidae  
 BIN URI: BOLD:AAB3836

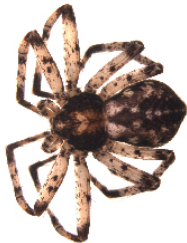

**BIOUG00635-F06 [Dorsal]**  
*Philodromus vulgaris*  
 Family: Philodromidae  
 BIN URI: BOLD:AAD2665

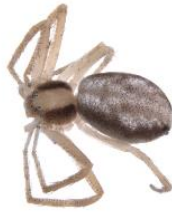

**BIOUG00886-B09 [Dorsal]**  
*Philodromus rufus vibrans*  
 Family: Philodromidae  
 BIN URI: BOLD:AAB2768

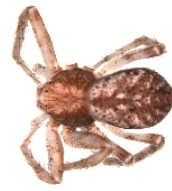

**BIOUG12604-F04 [Dorsal]**  
*Philodromus imbecillus*  
 Family: Philodromidae  
 BIN URI: BOLD:AAI2838

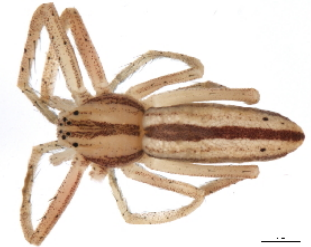

**08BBARAC-0191 [Dorsal]**  
*Tibellus maritimus*  
 Family: Philodromidae  
 BIN URI: BOLD:AAA7188

IMAGE NOT AVAILABLE

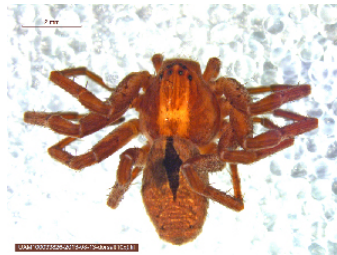

**UAM:Ento:94524 [Dorsal]**  
*Thanatus formicinus*  
 Family: Philodromidae

IMAGE NOT AVAILABLE

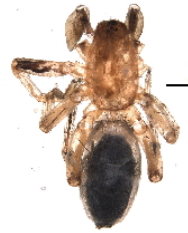

**BIOUG20599-C06 [Dorsal]**  
*Sergiolus ocellatus*  
 Family: Gnaphosidae  
 BIN URI: BOLD:ACV6055

**BIOUG20596-D02**  
*Tibellus oblongus*  
 Family: Philodromidae  
 BIN URI: BOLD:AAA7188

**BIOUG20598-H10**  
*Habronattus decorus*  
 Family: Salticidae

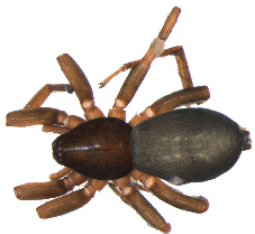

**BIOUG00614-C01 [Dorsal]**  
*Herpyllus ecclesiasticus*  
 Family: Gnaphosidae  
 BIN URI: BOLD:AAF2106

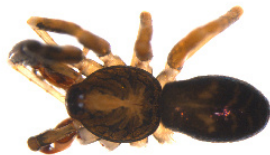

**CCDB-05303-A05 [Dorsal]**  
*Phrurotimpus borealis*  
 Family: Phrurolithidae  
 BIN URI: BOLD:AAC7234

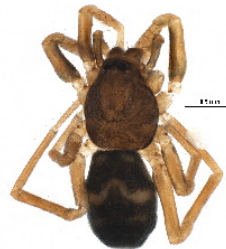

**BIOUG21773-F05 [Dorsal]**  
*Scotinella pugnata*  
 Family: Phrurolithidae  
 BIN URI: BOLD:AAK7452

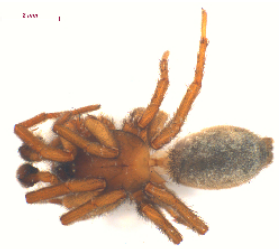

**10-SKBC-0613 [Dorsal]**  
*Haplodrassus signifer*  
 Family: Gnaphosidae  
 BIN URI: BOLD:AAD0462

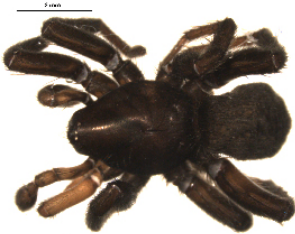

**CCDB-05258-E08 [Dorsal]**  
*Gnaphosa parvula*  
 Family: Gnaphosidae  
 BIN URI: BOLD:AAC3779

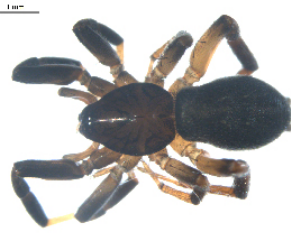

**BIOUG00617-A08 [Dorsal]**  
*Drassyllus depressus*  
 Family: Gnaphosidae  
 BIN URI: BOLD:AAD8676

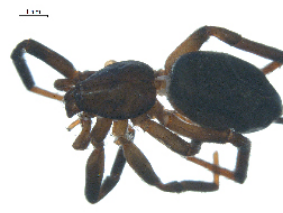

**BIOUG07161-G06 [Dorsal]**  
*Drassyllus niger*  
 Family: Gnaphosidae  
 BIN URI: BOLD:AAI9037

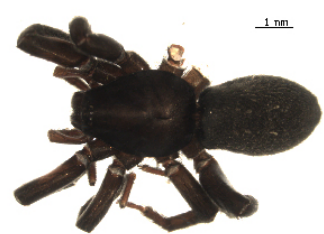

**BIOUG00515-G03 [Dorsal]**  
*Zelotes frateris*  
 Family: Gnaphosidae  
 BIN URI: BOLD:AAA8914

IMAGE NOT AVAILABLE

BIOUG20598-A04  
Zelotes pseustes  
Family: Gnaphosidae

IMAGE NOT AVAILABLE

BIOUG21899-F02  
Sarcoptiformes  
BIN URI: BOLD:ACV5533

IMAGE NOT AVAILABLE

BIOUG21773-G02  
Alycidae  
Family: Alycidae  
BIN URI: BOLD:ACV5777

IMAGE NOT AVAILABLE

BIOUG08101-C10  
Brachychthoniidae  
Family: Brachychthoniidae  
BIN URI: BOLD:ACJ0065

IMAGE NOT AVAILABLE

BIOUG21882-D09  
Brachychthoniidae  
Family: Brachychthoniidae  
BIN URI: BOLD:ACV6448

IMAGE NOT AVAILABLE

BIOUG21882-E08  
Brachychthoniidae  
Family: Brachychthoniidae  
BIN URI: BOLD:ACV7571

IMAGE NOT AVAILABLE

BIOUG20565-C01  
Nanorchestidae  
Family: Nanorchestidae  
BIN URI: BOLD:ACV4771

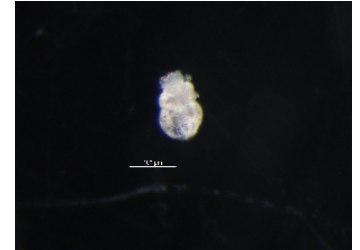

BIOUG01073-78 [Dorsal]  
Nanorchestes  
Family: Nanorchestidae  
BIN URI: BOLD:AAW0387

IMAGE NOT AVAILABLE

BIOUG21897-H09  
Nanorchestidae  
Family: Nanorchestidae  
BIN URI: BOLD:ACV5490

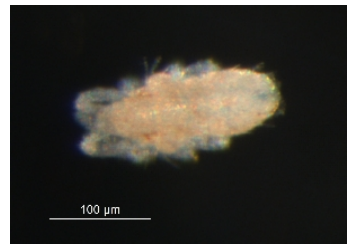

BIOUG01178-21 [Dorsal]  
Terpnacaridae  
Family: Terpnacaridae  
BIN URI: BOLD:AAZ4544

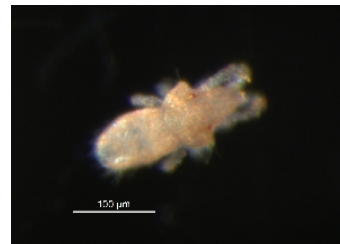

BIOUG01181-76 [Dorsal]  
Terpnacaridae  
Family: Terpnacaridae  
BIN URI: BOLD:ABV1694

IMAGE NOT AVAILABLE

BIOUG21897-F08  
Terpnacaridae  
Family: Terpnacaridae  
BIN URI: BOLD:ACV5851

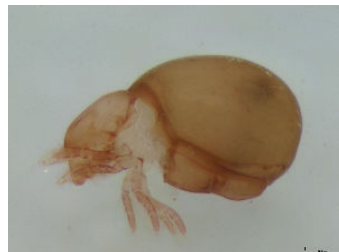

FINOR-20120366 [Lateral]  
Phthiracarus crinitus  
Family: Phthiracaridae  
BIN URI: BOLD:AAF6471

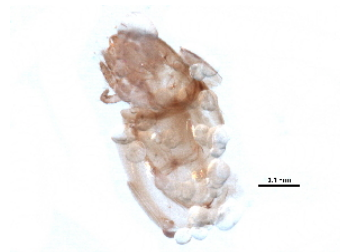

BIOUG24000-A09 [Dorsal]  
Phthiracarus  
Family: Phthiracaridae

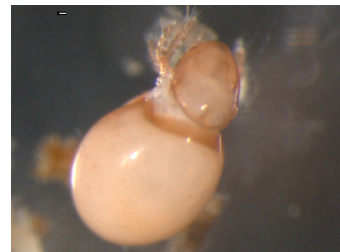

08MIONT-0216 [Dorsal]  
Phthiracaridae  
Family: Phthiracaridae  
BIN URI: BOLD:AAF9149

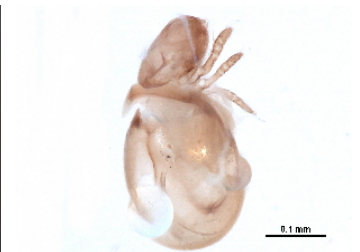

BIOUG20565-B03 [Dorsal]  
Phthiracaridae  
Family: Phthiracaridae  
BIN URI: BOLD:ACV3446

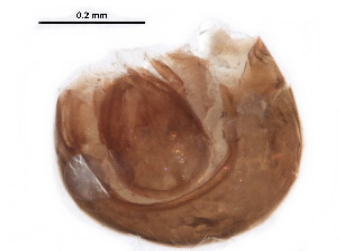

BIOUG21899-C03 [Dorsal]  
Phthiracaridae  
Family: Phthiracaridae  
BIN URI: BOLD:ACV5448

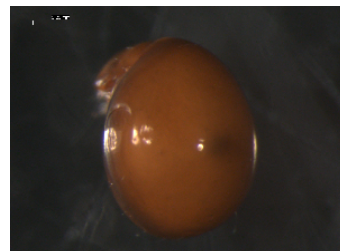

08MIONT-0066 [Dorsal]  
Phthiracaridae  
Family: Phthiracaridae  
BIN URI: BOLD:AAF9095

IMAGE NOT AVAILABLE

BIOUG24005-H07  
Phthiracaridae  
Family: Phthiracaridae

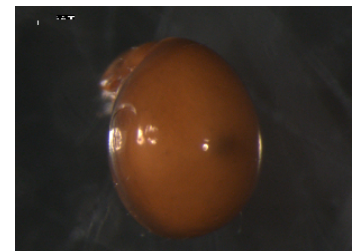

08MIONT-0065 [Dorsal]  
Phthiracaridae  
Family: Phthiracaridae  
BIN URI: BOLD:AAF9094

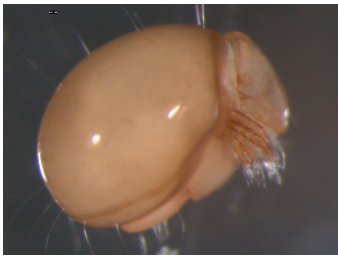

**08MIONT-0251 [Dorsal]**  
Phthiracaridae  
Family: Phthiracaridae  
BIN URI: BOLD:AAF9158

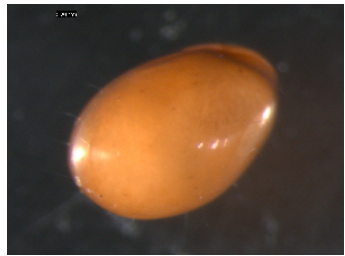

**08MIONT-0160 [Dorsal]**  
Phthiracaridae  
Family: Phthiracaridae  
BIN URI: BOLD:AAF9142

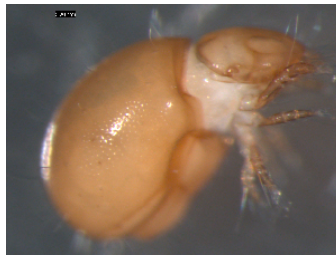

**08MIONT-0128 [Dorsal]**  
Phthiracaridae  
Family: Phthiracaridae  
BIN URI: BOLD:AAF9137

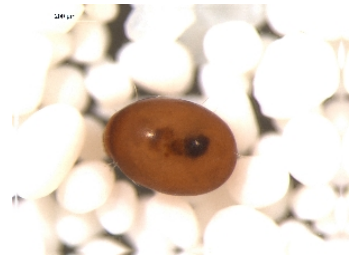

**DPMIT-24-76 [Dorsal]**  
Phthiracaridae  
Family: Phthiracaridae  
BIN URI: BOLD:ABA8153

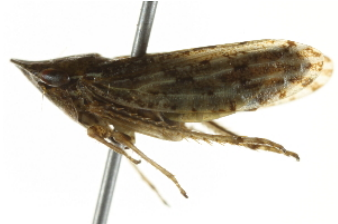

**PCPP10-0684 [Dorsal]**  
Aphrodes makarovi  
Family: Cicadellidae  
BIN URI: BOLD:AAG2876

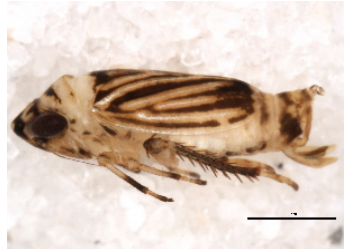

**09BBEHE-218 [Lateral]**  
Anoscopus flavovstriatus  
Family: Cicadellidae  
BIN URI: BOLD:AA8385

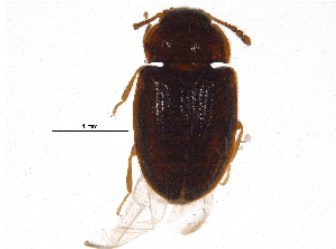

**BIOUG09832-A06 [Dorsal]**  
Endomychidae  
Family: Endomychidae  
BIN URI: BOLD:ACL2587

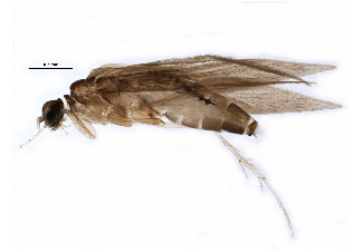

**BIOUG11743-G05 [Lateral]**  
Hydroptilidae  
Family: Hydroptilidae  
BIN URI: BOLD:ACM7558

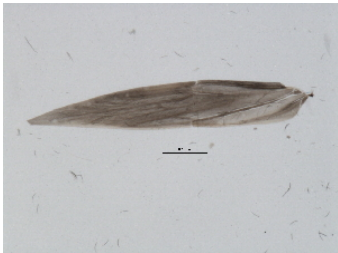

**07ELEPT-167 [Lateral]**  
Orthotrichia cristata  
Family: Hydroptilidae  
BIN URI: BOLD:ACM7774

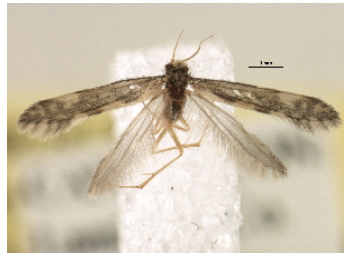

**BIOUG16764-F12 [Dorsal]**  
Agraylea multipunctata  
Family: Hydroptilidae  
BIN URI: BOLD:AAA3877

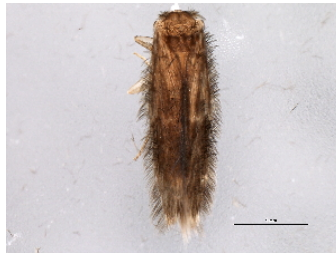

**10HDT-036 [Dorsal]**  
Hydroptila perdita  
Family: Hydroptilidae  
BIN URI: BOLD:AAE5187

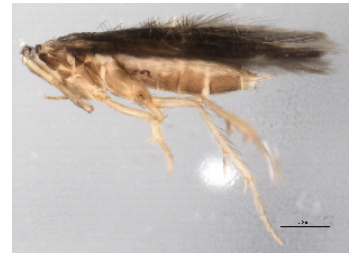

**10HDT-037 [Lateral]**  
Hydroptila armata  
Family: Hydroptilidae  
BIN URI: BOLD:AAF4109

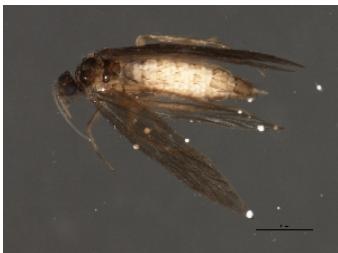

**08ONCAD-0270 [Dorsal]**  
Hydroptila spatulata  
Family: Hydroptilidae  
BIN URI: BOLD:AAD0137

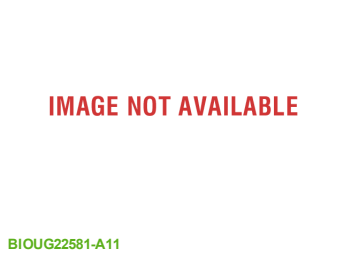

**BIOUG22581-A11**  
Hydroptila spatulata  
Family: Hydroptilidae

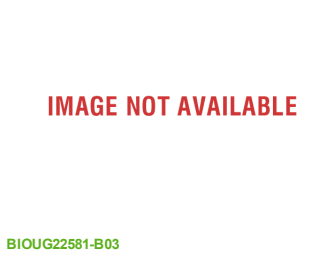

**BIOUG22581-B03**  
Hydroptila spatulata  
Family: Hydroptilidae

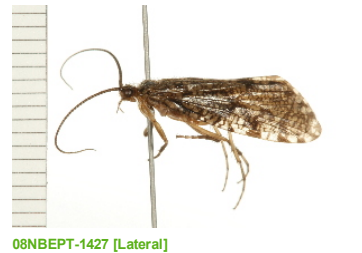

**08NBEPT-1427 [Lateral]**  
Banksiola crotchi  
Family: Phygadeiidae  
BIN URI: BOLD:AAA4801

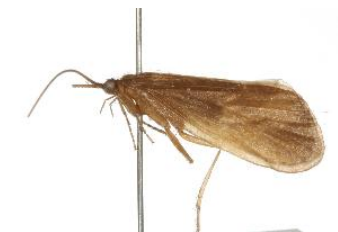

**TRIC 0234.02 [Lateral]**  
Ironoquia punctatissima  
Family: Limnephilidae  
BIN URI: BOLD:AAB2190

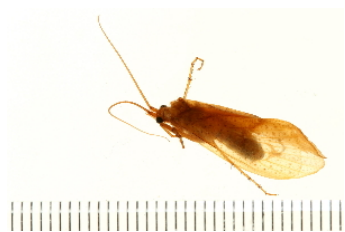

**08INHST-055 [Lateral]**  
Pycnopsyche antica  
Family: Limnephilidae  
BIN URI: BOLD:ACF4302

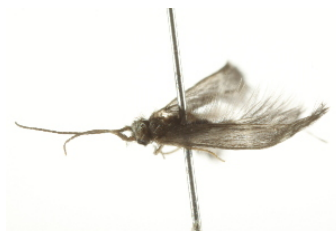

**10USCAD-019 [Lateral]**  
Trichoptera  
BIN URI: BOLD:AAO3983

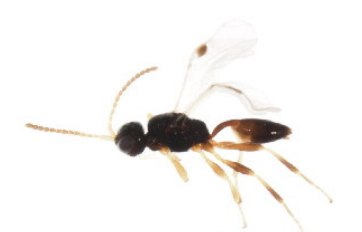

**BIOUG01049-B10 [Lateral]**  
Euphoriella  
Family: Braconidae  
BIN URI: BOLD:AAU9119

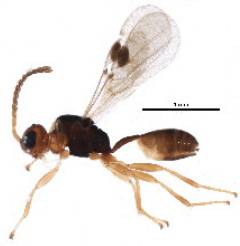

**BIOUG22723-B12 [Lateral]**  
Braconidae  
Family: Braconidae  
BIN URI: BOLD:ACV5990

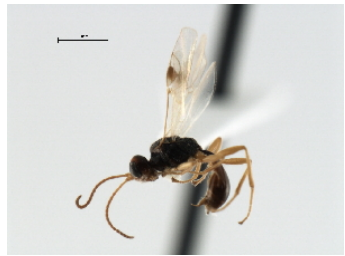

**CBRA0441 [Lateral]**  
Peristenus sp.  
Family: Braconidae  
BIN URI: BOLD:AAA8469

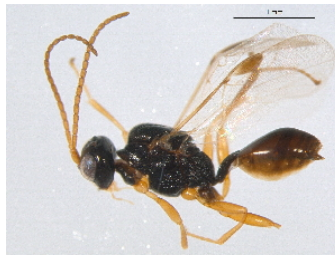

**BIOUG05726-D09 [Lateral]**  
Peristenus  
Family: Braconidae  
BIN URI: BOLD:AAA8464

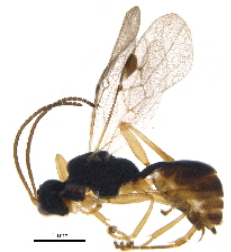

**BIOUG22573-G02 [Lateral]**  
Peristenus  
Family: Braconidae  
BIN URI: BOLD:ACV4624

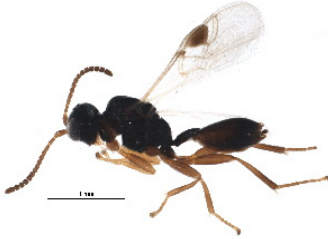

**BIOUG22453-E08 [Lateral]**  
Peristenus  
Family: Braconidae  
BIN URI: BOLD:ACK1458

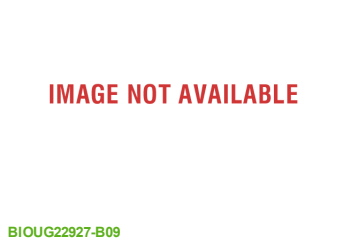

**BIOUG22927-B09**  
Peristenus  
Family: Braconidae

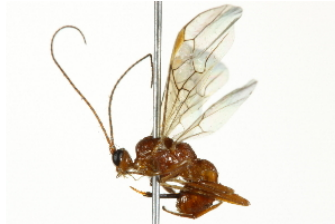

**10BBCHY-3501 [Lateral]**  
Euphorinae  
Family: Braconidae  
BIN URI: BOLD:AAU8900

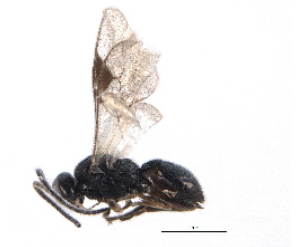

**10PHMAL-0722 [Lateral]**  
Euphorinae  
Family: Braconidae  
BIN URI: BOLD:AAU8319

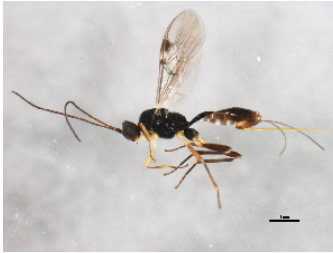

**BIOUG00988-A06 [Lateral]**  
Hymenoptera  
BIN URI: BOLD:ABX2611

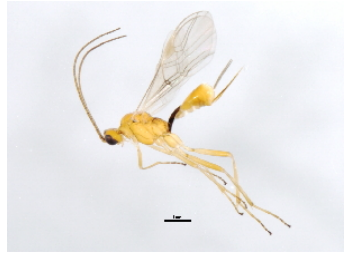

**09BBEHY-0207 [Lateral]**  
Meteorus  
Family: Braconidae  
BIN URI: BOLD:AAI1549

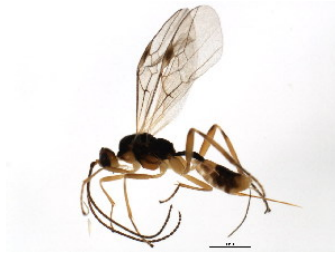

**BIOUG00862-E11 [Lateral]**  
Meteorus  
Family: Braconidae  
BIN URI: BOLD:AAZ3290

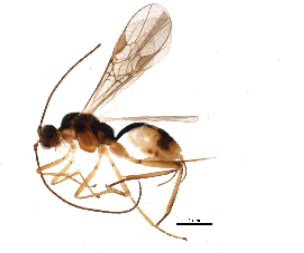

**BIOUG08609-A01 [Lateral]**  
Meteorus  
Family: Braconidae  
BIN URI: BOLD:ACK1841

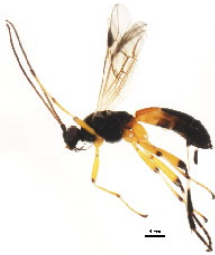

**BIOUG01082-E03 [Lateral]**  
Aleiodes  
Family: Braconidae  
BIN URI: BOLD:AAG7629

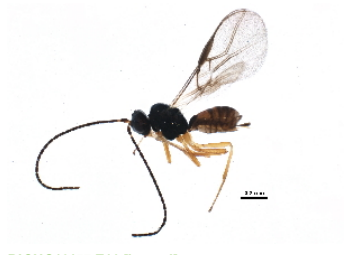

**BIOUG16157-E11 [Lateral]**  
Opiinae  
Family: Braconidae  
BIN URI: BOLD:ACL6870

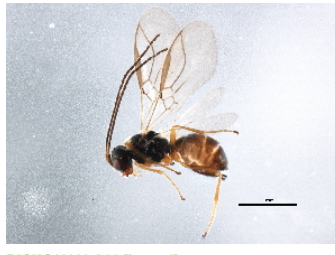

**BIOUG16088-A06 [Lateral]**  
Alysiinae  
Family: Braconidae  
BIN URI: BOLD:AAAN8140

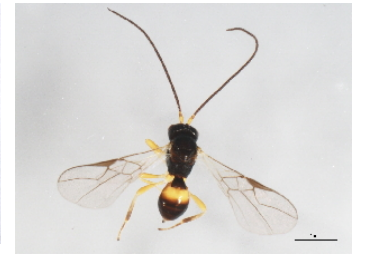

**BIOUG00836-H09 [Dorsal]**  
Braconidae  
Family: Braconidae  
BIN URI: BOLD:AAV9202

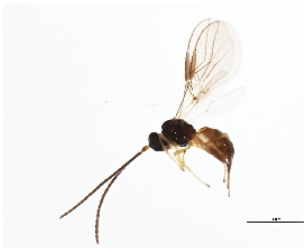

**BIOUG00836-A07 [Lateral]**  
Opiinae  
Family: Braconidae  
BIN URI: BOLD:AAG8413

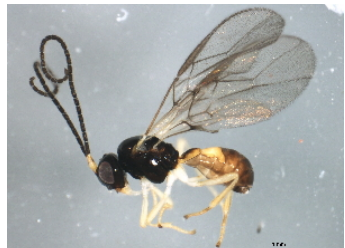

**BIOUG01029-H03 [Lateral]**  
Opiinae  
Family: Braconidae  
BIN URI: BOLD:ABA5939

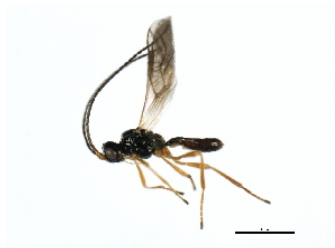

**07PROBE-22199 [Lateral]**  
Alysiinae  
Family: Braconidae  
BIN URI: BOLD:AAG1289

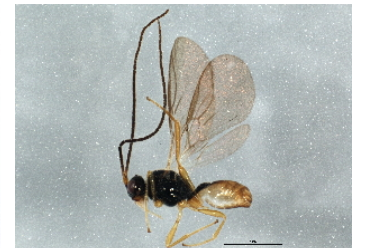

**BIOUG03385-E01 [Lateral]**  
Alysiinae  
Family: Braconidae  
BIN URI: BOLD:AAV9197

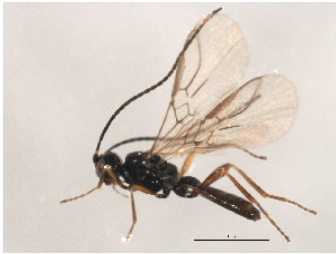

**10BBCHY-2904 [Lateral]**  
 Alysiinae  
 Family: Braconidae  
 BIN URI: BOLD: AAN8138

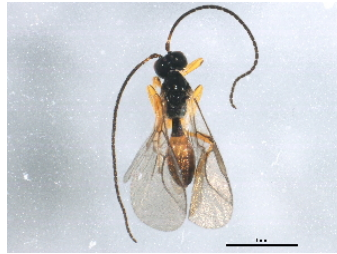

**BIOUG01029-H04 [Lateral]**  
 Alysiinae  
 Family: Braconidae  
 BIN URI: BOLD: AAQ2937

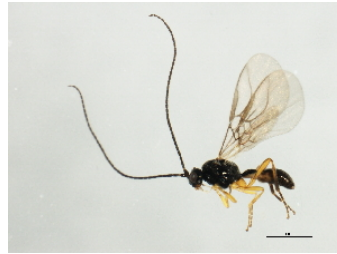

**10BBCHY-1868 [Lateral]**  
 Alysiinae  
 Family: Braconidae  
 BIN URI: BOLD: AAG1322

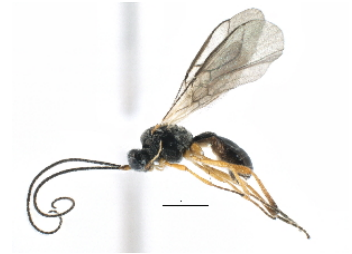

**BIOUG04788-F02 [Lateral]**  
 Chorebus 1MJS  
 Family: Braconidae  
 BIN URI: BOLD: AAM7414

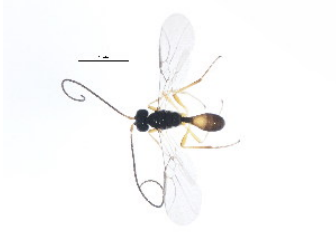

**BIOUG00857-A12 [Dorsal]**  
 Alysiinae  
 Family: Braconidae  
 BIN URI: BOLD: AAU8209

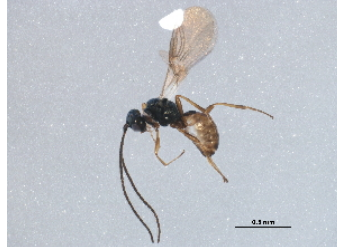

**BIOUG16006-D04 [Lateral]**  
 Alysiinae  
 Family: Braconidae  
 BIN URI: BOLD: ACP8084

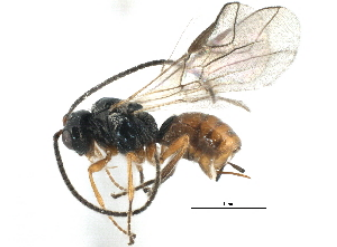

**BIOUG08025-D05 [Lateral]**  
 Opiinae  
 Family: Braconidae  
 BIN URI: BOLD: ACI9828

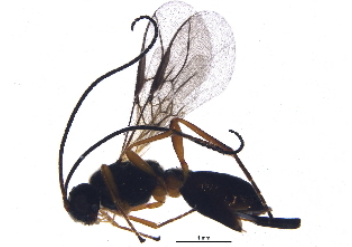

**BIOUG13284-A06 [Lateral]**  
 Alysiinae  
 Family: Braconidae  
 BIN URI: BOLD: ACO4997

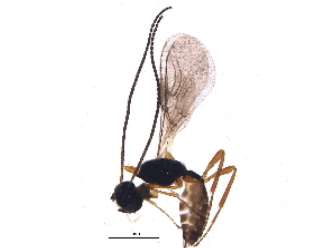

**BIOUG13981-C11 [Lateral]**  
 Alysiinae  
 Family: Braconidae  
 BIN URI: BOLD: ACO7449

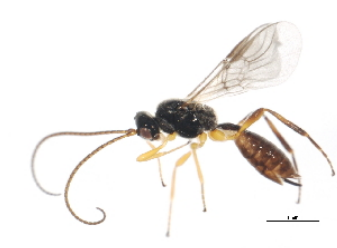

**09BBHYM-651 [Lateral]**  
 Braconidae  
 Family: Braconidae  
 BIN URI: BOLD: AAG8239

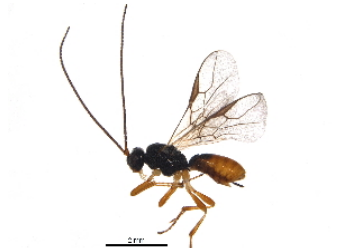

**BIOUG22866-G05 [Lateral]**  
 Braconidae  
 Family: Braconidae  
 BIN URI: BOLD: ACW1166

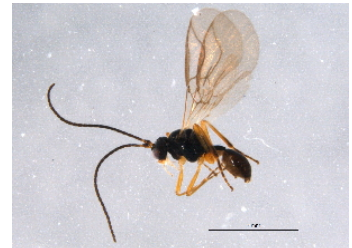

**BIOUG04804-H04 [Lateral]**  
 Alysiinae  
 Family: Braconidae  
 BIN URI: BOLD: ACG4118

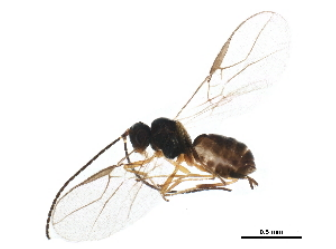

**BIOUG23320-H06 [Lateral]**  
 Braconidae  
 Family: Braconidae  
 BIN URI: BOLD: ACW1288

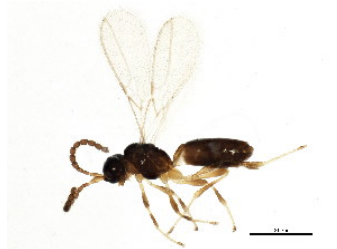

**BIOUG01605-G06 [Lateral]**  
 Alysiinae  
 Family: Braconidae  
 BIN URI: BOLD: AAN8202

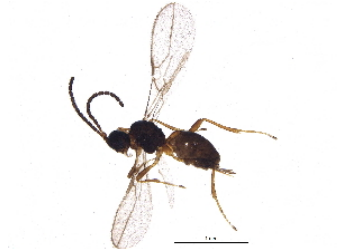

**BIOUG11205-A11 [Lateral]**  
 Dinotrema  
 Family: Braconidae  
 BIN URI: BOLD: ACF3545

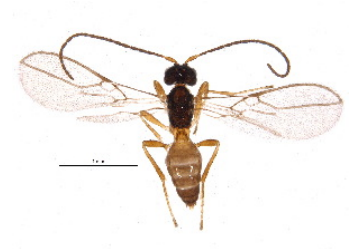

**BIOUG19927-G01 [Dorsal]**  
 Alysiinae  
 Family: Braconidae  
 BIN URI: BOLD: ACT0326

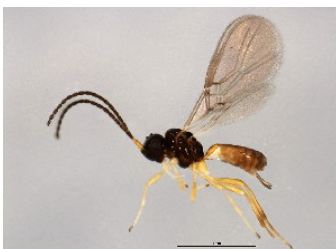

**ASGLE-0229 [Lateral]**  
 Hymenoptera  
 BIN URI: BOLD: AAF5747

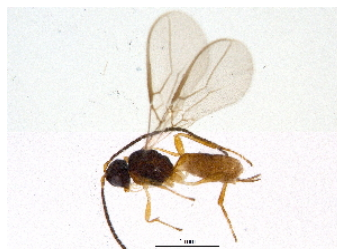

**ASGLE2-0489 [Lateral]**  
 Hymenoptera  
 BIN URI: BOLD: AAU8558

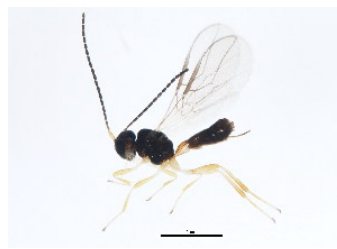

**BIOUG00857-E10 [Lateral]**  
 Dinotrema  
 Family: Braconidae  
 BIN URI: BOLD: AAY6824

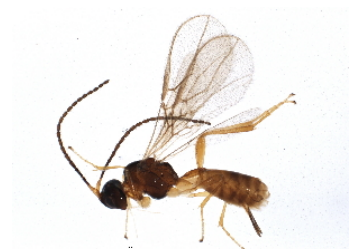

**BIOUG10452-H09 [Lateral]**  
 Alysiinae  
 Family: Braconidae  
 BIN URI: BOLD: AAH3190

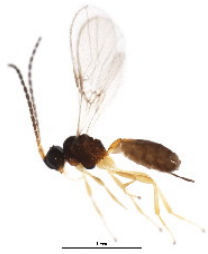

**BIOUG01258-H04 [Lateral]**  
Dinotrema JFT23  
Family: Braconidae  
BIN URI: BOLD:AAU8348

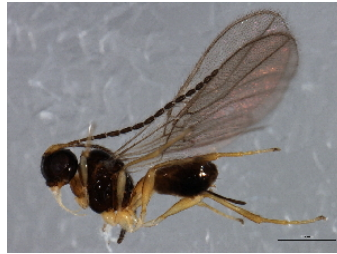

**09BBEHY-1674 [Lateral]**  
Alysiinae  
Family: Braconidae  
BIN URI: BOLD:AAM7451

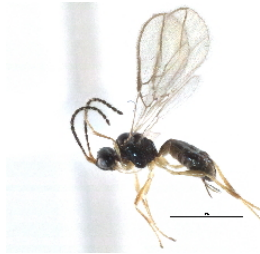

**BIOUG08568-E11 [Lateral]**  
Dinotrema  
Family: Braconidae  
BIN URI: BOLD:AAU8452

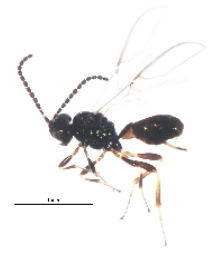

**ASGLE-0576 [Lateral]**  
Hymenoptera  
BIN URI: BOLD:AAU8379

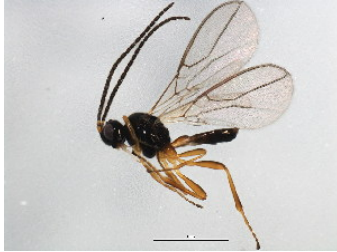

**ASGLE-0545 [Lateral]**  
Hymenoptera  
BIN URI: BOLD:AAG1342

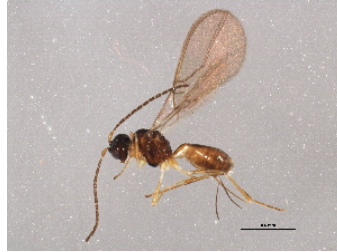

**BIOUG06437-B11 [Lateral]**  
Dinotrema  
Family: Braconidae  
BIN URI: BOLD:ACI4486

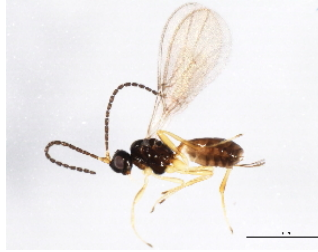

**ASGLE2-0228 [Lateral]**  
Hymenoptera  
BIN URI: BOLD:ABZ5626

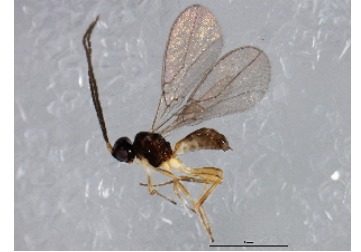

**09BBEHY-1690 [Lateral]**  
Dinotrema  
Family: Braconidae  
BIN URI: BOLD:ACE5711

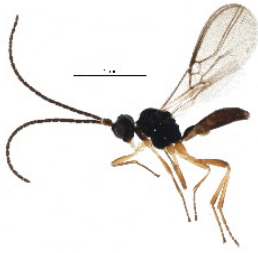

**BIOUG20793-G12 [Lateral]**  
Alysiinae  
Family: Braconidae  
BIN URI: BOLD:ACU9141

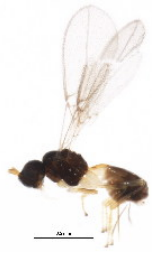

**BIOUG01258-B11 [Lateral]**  
Dinotrema JFT01  
Family: Braconidae  
BIN URI: BOLD:ACE5710

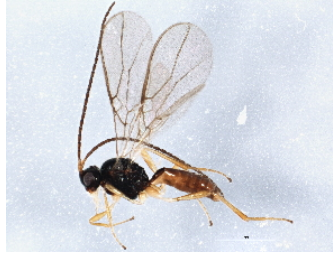

**BIOUG06249-G10 [Lateral]**  
Dinotrema  
Family: Braconidae  
BIN URI: BOLD:AAA7636

**IMAGE NOT AVAILABLE**

**BIOUG22322-F05**  
Dinotrema  
Family: Braconidae

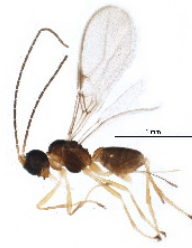

**BIOUG22453-A01 [Lateral]**  
Asobara rufescens  
Family: Braconidae  
BIN URI: BOLD:AAU8583

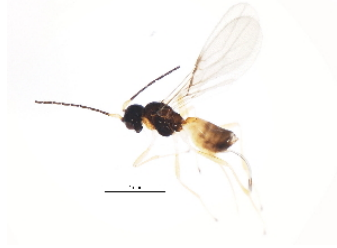

**BIOUG00845-G05 [Lateral]**  
Asobara  
Family: Braconidae  
BIN URI: BOLD:AAU8579

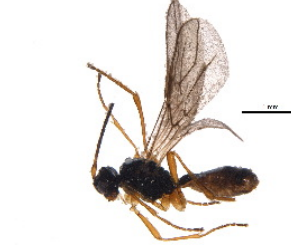

**BIOUG21888-B10 [Lateral]**  
Phaenocarpa  
Family: Braconidae  
BIN URI: BOLD:ACV5717

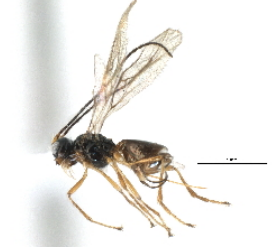

**BIOUG08658-D03 [Lateral]**  
Asobara  
Family: Braconidae  
BIN URI: BOLD:AAH3171

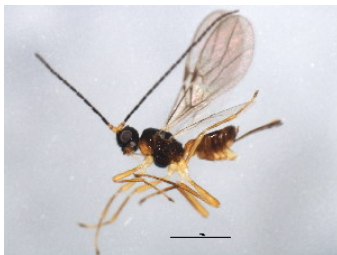

**ASGLE-0237 [Lateral]**  
Hymenoptera  
BIN URI: BOLD:AAM7459

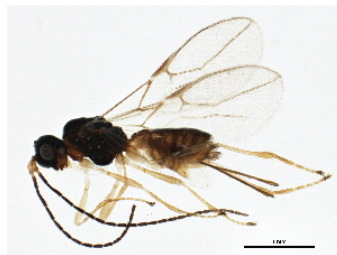

**BIOUG02604-G10 [Lateral]**  
Asobara  
Family: Braconidae  
BIN URI: BOLD:ABY1452

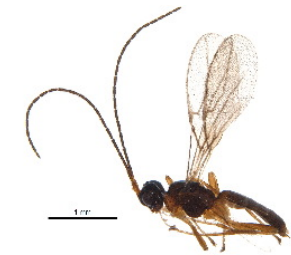

**BIOUG24007-C03 [Lateral]**  
Alysiinae  
Family: Braconidae

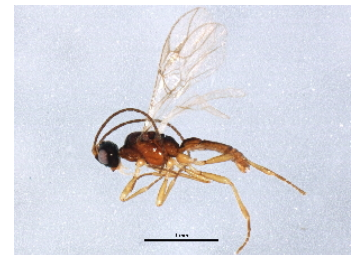

**BIOUG01657-B04 [Lateral]**  
Rhysalinae  
Family: Braconidae  
BIN URI: BOLD:AAQ2112

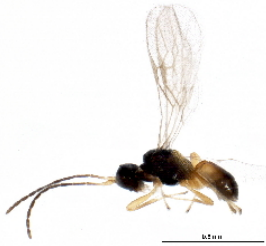

**BIOUG22458-B12 [Lateral]**  
 Rhysalinae  
 Family: Braconidae  
 BIN URI: BOLD:AAQ2892

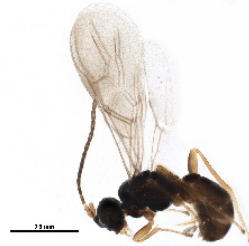

**BIOUG22421-B04 [Lateral]**  
 Braconidae  
 Family: Braconidae  
 BIN URI: BOLD:AC08570

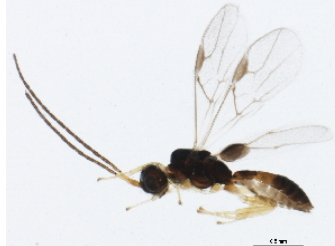

**10PHMAL-3249 [Lateral]**  
 Doryctinae  
 Family: Braconidae  
 BIN URI: BOLD:AAU8206

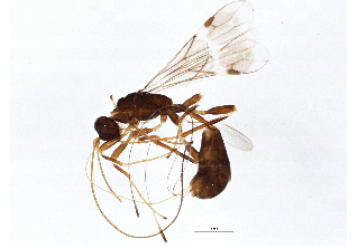

**BIOUG05096-A07 [Lateral]**  
 Doryctinae  
 Family: Braconidae  
 BIN URI: BOLD:ACG6283

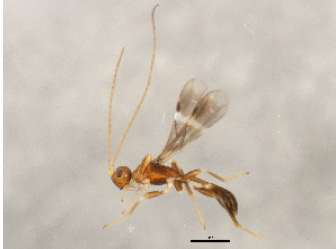

**ASGLE-0857 [Lateral]**  
 Hymenoptera  
 BIN URI: BOLD:ACM3076

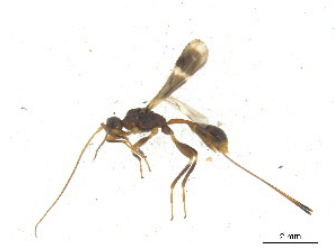

**BIOUG06753-F06 [Lateral]**  
 Hymenoptera  
 BIN URI: BOLD:ACM8393

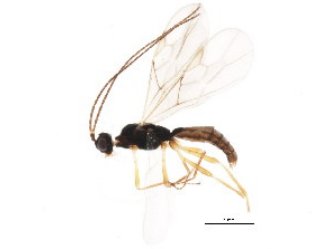

**BIOUG01037-D03 [Lateral]**  
 Hormiinae  
 Family: Braconidae  
 BIN URI: BOLD:ABA5915

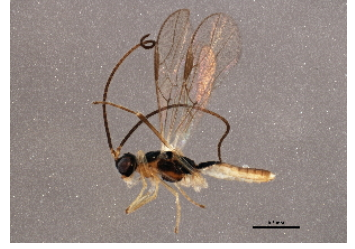

**BIOUG03166-H04 [Lateral]**  
 Braconidae  
 Family: Braconidae  
 BIN URI: BOLD:AA9207

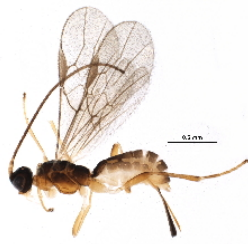

**BIOUG21522-B07 [Lateral]**  
 Hymenoptera  
 BIN URI: BOLD:ACU9920

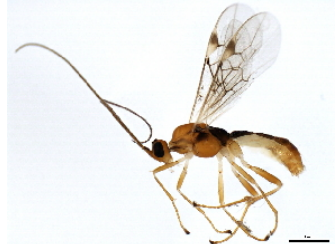

**10BBHYM-1181 [Lateral]**  
 Aleiodes  
 Family: Braconidae  
 BIN URI: BOLD:AAG1350

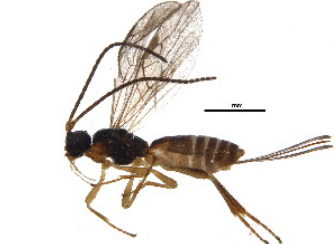

**BIOUG24007-E01 [Lateral]**  
 Braconidae  
 Family: Braconidae

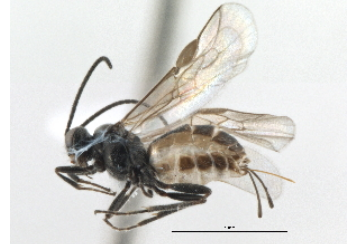

**BIOUG04050-F09 [Lateral]**  
 Habrobracon  
 Family: Braconidae  
 BIN URI: BOLD:AAG8403

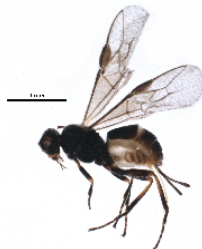

**BIOUG24034-G07 [Lateral]**  
 Braconidae  
 Family: Braconidae

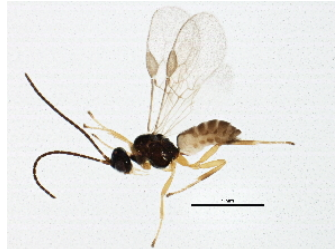

**BIOUG02746-B06 [Lateral]**  
 Bracon  
 Family: Braconidae  
 BIN URI: BOLD:ACA7945

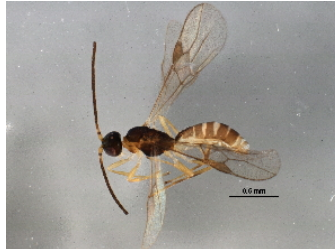

**BIOUG08589-A06 [Lateral]**  
 Bracon  
 Family: Braconidae  
 BIN URI: BOLD:ACK1835

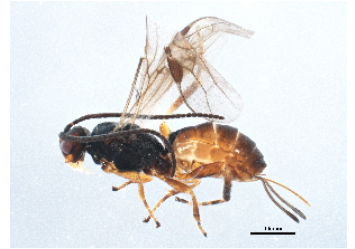

**BIOUG10360-F03 [Lateral]**  
 Bracon  
 Family: Braconidae  
 BIN URI: BOLD:ABV2692

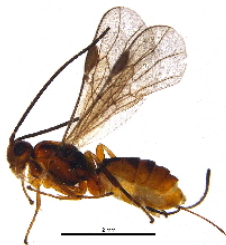

**BIOUG08001-F08 [Lateral]**  
 Bracon  
 Family: Braconidae  
 BIN URI: BOLD:ACI9921

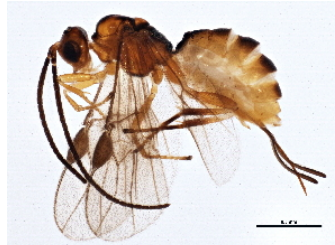

**BIOUG03049-G09 [Lateral]**  
 Bracon  
 Family: Braconidae  
 BIN URI: BOLD:AAG1345

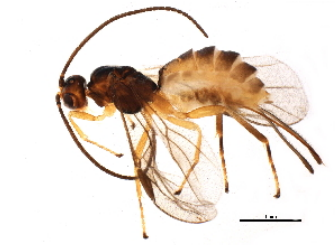

**BIOUG08746-E07 [Lateral]**  
 Bracon  
 Family: Braconidae  
 BIN URI: BOLD:ACP8803

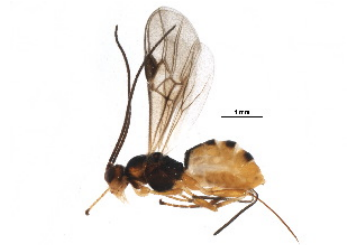

**BIOUG22420-D02 [Lateral]**  
 Bracon  
 Family: Braconidae  
 BIN URI: BOLD:ACV3190

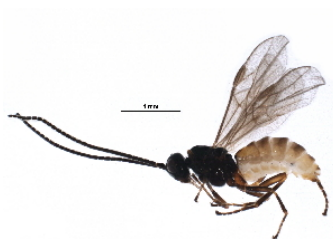

**BIOUG24038-B11 [Lateral]**  
Braconidae  
Family: Braconidae

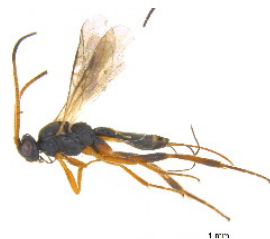

**BIOUG06752-D10 [Lateral]**  
Hymenoptera  
BIN URI: BOLD:AAG1084

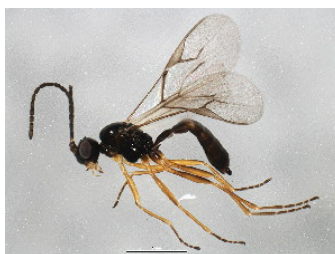

**ASGLE-0915 [Lateral]**  
Hymenoptera  
BIN URI: BOLD:AAA4188

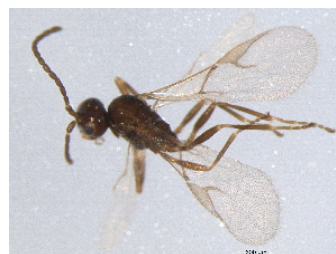

**BIOUG05612-G12 [Lateral]**  
Diaeretiella rapae  
Family: Braconidae  
BIN URI: BOLD:AAG1421

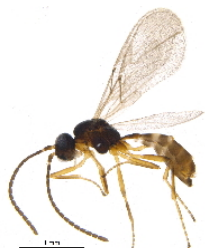

**BIOUG21771-G01 [Lateral]**  
Aphidius  
Family: Braconidae  
BIN URI: BOLD:AAK2038

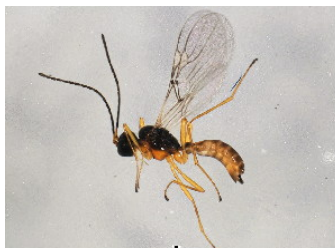

**ASGLE-0569 [Lateral]**  
Hymenoptera  
BIN URI: BOLD:AAH7443

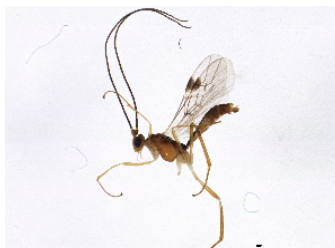

**BIOUG01839-E10 [Lateral]**  
Macrocentrus  
Family: Braconidae  
BIN URI: BOLD:AAE8369

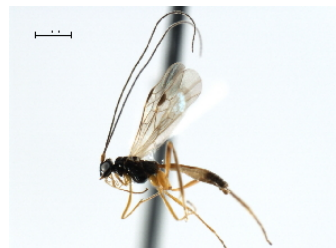

**CBRA0158 [Lateral]**  
Macrocentrus sp.  
Family: Braconidae  
BIN URI: BOLD:AAE8370

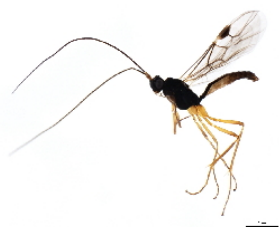

**08BBHYM-0876 [Lateral]**  
Macrocentrus  
Family: Braconidae  
BIN URI: BOLD:AAG1352

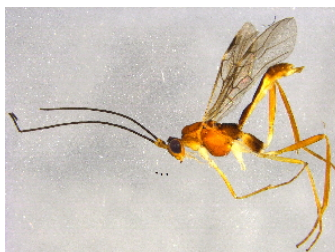

**BIOUG03698-D07 [Lateral]**  
Macrocentrus  
Family: Braconidae  
BIN URI: BOLD:AAV6794

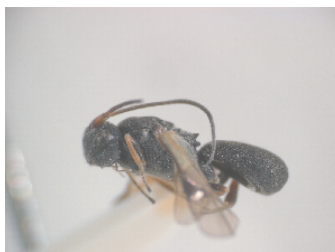

**NZAC04036453 [Lateral]**  
Ascogaster quadridentata  
Family: Braconidae  
BIN URI: BOLD:AAI4826

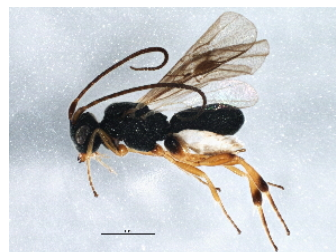

**BIOUG06009-B08 [Lateral]**  
Ascogaster  
Family: Braconidae  
BIN URI: BOLD:ACI7729

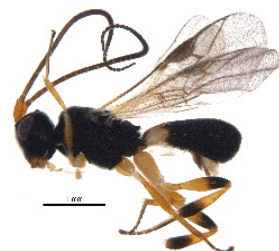

**BIOUG22565-D07 [Lateral]**  
Ascogaster  
Family: Braconidae  
BIN URI: BOLD:ACV3169

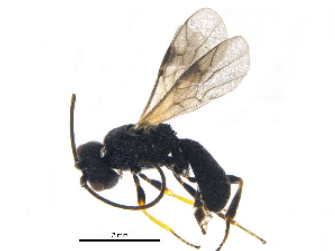

**BIOUG22872-G05 [Lateral]**  
Chelonus  
Family: Braconidae  
BIN URI: BOLD:ACV5685

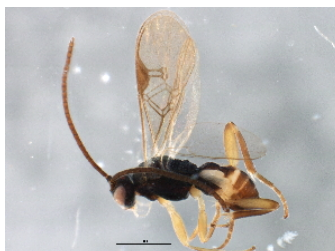

**BIOUG01572-G05 [Lateral]**  
Diolcogaster jft32  
Family: Braconidae  
BIN URI: BOLD:AAI6272

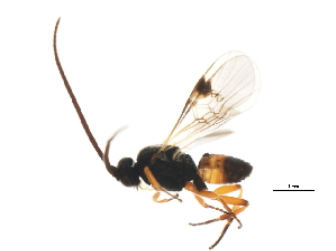

**PCPP10-0449 [Lateral]**  
Microplitis jft53  
Family: Braconidae  
BIN URI: BOLD:AAE8502

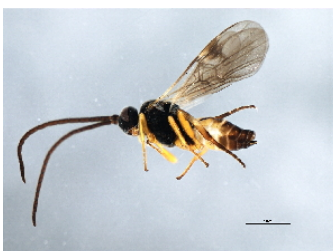

**07PROBE-22352 [Lateral]**  
Microplitis varicolor

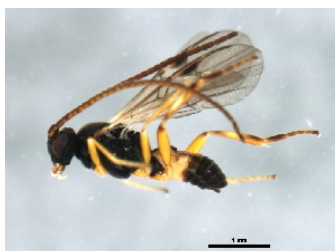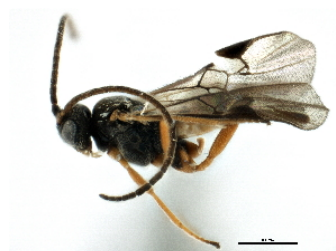



**09BBHYM-904 [Lateral]**  
Microplitis jft28  
Family: Braconidae  
BIN URI: BOLD:AAK6504

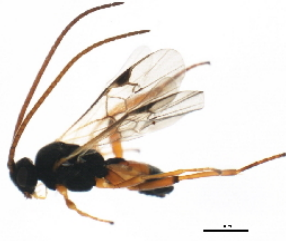

Family: Braconidae  
BIN URI: BOLD:AAA2408

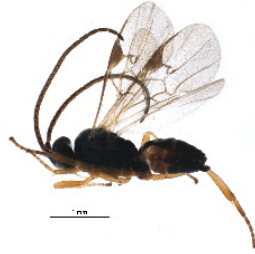

**BIOUG01029-D10 [Lateral]**  
Microplitis jft21  
Family: Braconidae  
BIN URI: BOLD:AAE8603

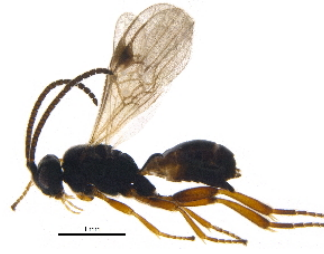

**BIOUG01638-C10 [Lateral]**  
Microplitis jft23  
Family: Braconidae  
BIN URI: BOLD:ABZ3353

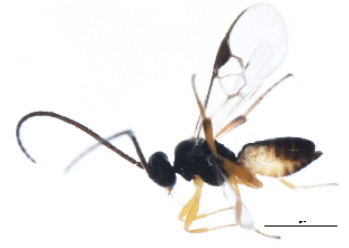

**BIOUG01033-F05 [Lateral]**  
Microplitis jft60  
Family: Braconidae  
BIN URI: BOLD:AAE8461

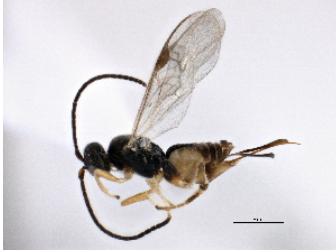

**BIOUG22469-F06 [Lateral]**  
Microplitis  
Family: Braconidae  
BIN URI: BOLD:AAH3516

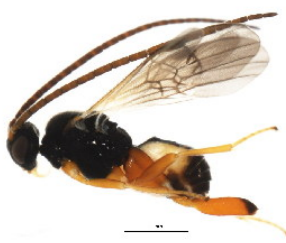

**BIOUG22465-F02 [Lateral]**  
Microplitis  
Family: Braconidae  
BIN URI: BOLD:ACV5700

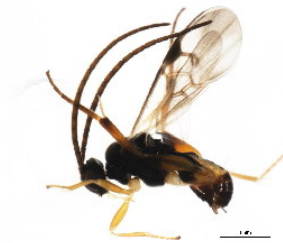

**TDWG-0316 [Lateral]**  
Glyptapanteles sp.  
Family: Braconidae  
BIN URI: BOLD:AAA4781

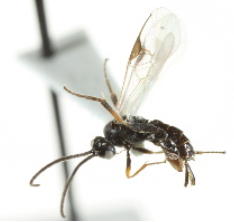

**BIOUG07081-A05 [Lateral]**  
Choeras  
Family: Braconidae  
BIN URI: BOLD:AAK1835

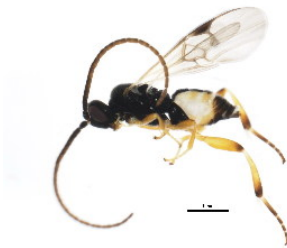

**BIOUG01088-F11 [Lateral]**  
Diolcogaster jft30  
Family: Braconidae  
BIN URI: BOLD:AAB0185

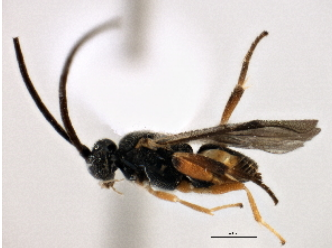

**BIOUG01149-D11 [Lateral]**  
Diolcogaster facetosa  
Family: Braconidae  
BIN URI: BOLD:ABA5941

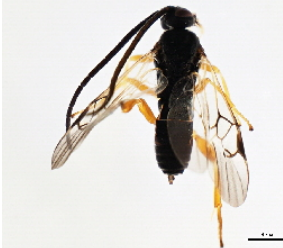

**07PROBE-22434 [Lateral]**  
Apanteles jft01  
Family: Braconidae  
BIN URI: BOLD:AAA6373

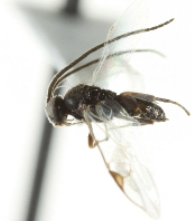

**BIOUG01032-F09 [Lateral]**  
Microgaster jft11  
Family: Braconidae  
BIN URI: BOLD:AAH3530

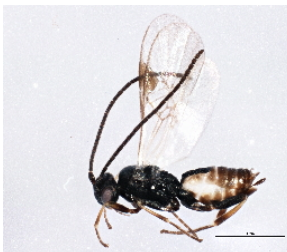

**BIOUG03675-F02 [Lateral]**  
Microgaster jft17  
Family: Braconidae  
BIN URI: BOLD:AAA7886

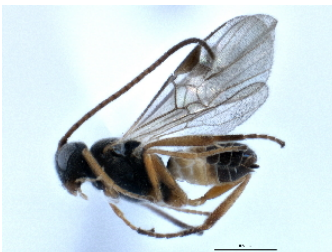

**BIOUG01028-C03 [Dorsal]**  
Microgaster jft13  
Family: Braconidae  
BIN URI: BOLD:ACF5282

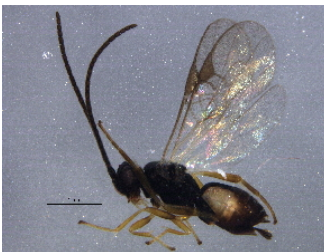

**07PROBE-24235 [Lateral]**  
Pholetesor omigis  
Family: Braconidae  
BIN URI: BOLD:AAB0520

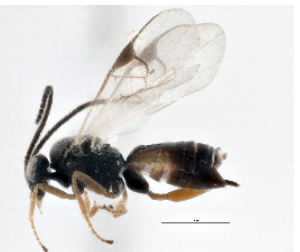

**BIOUG02712-F08 [Lateral]**  
Pholetesor  
Family: Braconidae  
BIN URI: BOLD:AAD5198

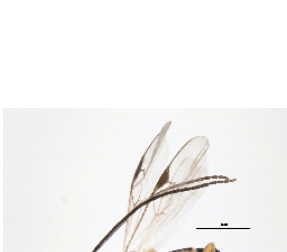

**BIOUG08597-F12 [Lateral]**  
Pholetesor sp.  
Family: Braconidae  
BIN URI: BOLD:AAE0349

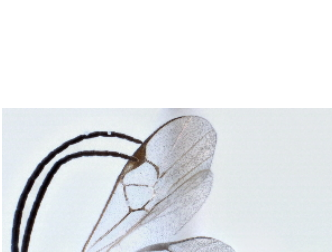

**BIOUG08526-G06 [Lateral]**  
Pholetesor  
Family: Braconidae  
BIN URI: BOLD:ACK5660

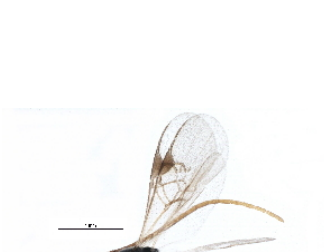

**BIOUG06168-G03 [Lateral]**  
Cotesia sp.  
Family: Braconidae  
BIN URI: BOLD:ABZ3751

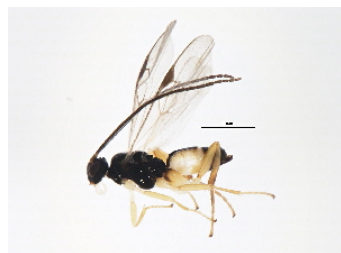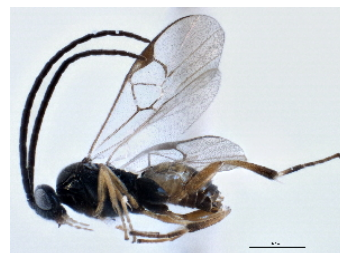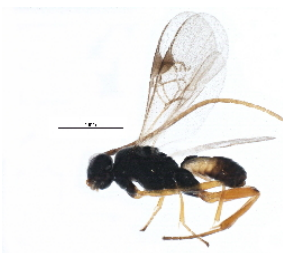

IMAGE NOT AVAILABLE

**ASGLE2-0132 [Lateral]**

**BIOUG03720-F07 [Lateral]**

**BIOUG17215-B11 [Lateral]**

**BIOUG22862-H06**  
Cotesia xyliina

Protapanteles  
Family: Braconidae  
BIN URI: BOLD:AAA4782

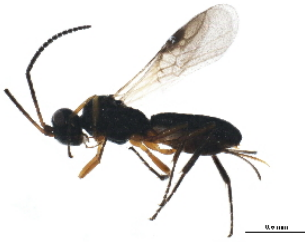

**BIOUG24008-C07 [Lateral]**  
Braconidae  
Family: Braconidae

Dolichogenidea sp.  
Family: Braconidae  
BIN URI: BOLD:AAB0096

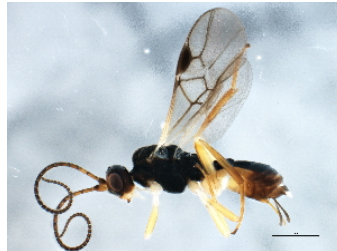

**BIOUG02736-C01 [Lateral]**  
Aliolus  
Family: Braconidae  
BIN URI: BOLD:AAU8214

Cotesia  
Family: Braconidae  
BIN URI: BOLD:AAA9386

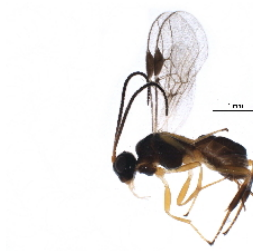

**BIOUG24009-E01 [Lateral]**  
Braconidae  
Family: Braconidae

Family: Braconidae

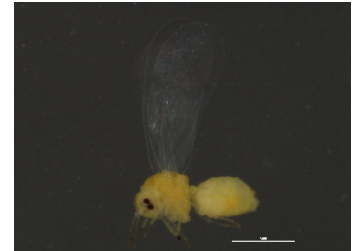

**BIOUG00999-A09 [Lateral]**  
Aleyrodidae  
Family: Aleyrodidae  
BIN URI: BOLD:AAZ8500

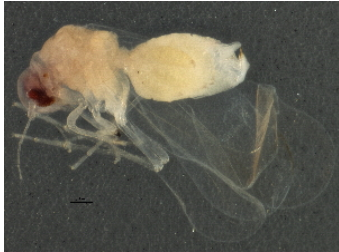

**BIOUG01797-G01 [Lateral]**  
Aleyrodidae  
Family: Aleyrodidae  
BIN URI: BOLD:AAZ8501

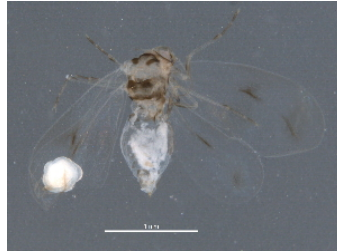

**BIOUG07277-A08 [Dorsal]**  
Aleyrodes  
Family: Aleyrodidae  
BIN URI: BOLD:ABW2915

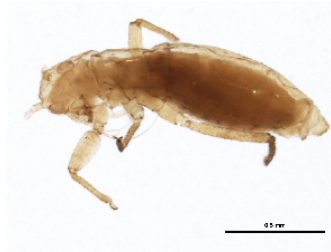

**BIOUG01308-B09 [Lateral]**  
Essigella  
Family: Aphididae  
BIN URI: BOLD:AAI4969

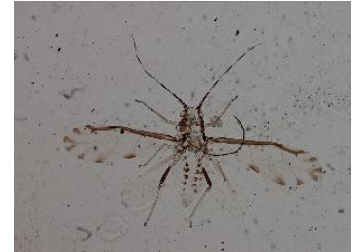

**CNC#HEM006905 [Dorsal]**  
Eucallipterus tiliae  
Family: Aphididae  
BIN URI: BOLD:AAD0131

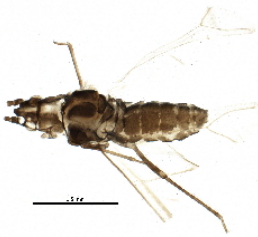

**BIOUG22082-A11 [Lateral]**  
Saltusaphidinae  
Family: Aphididae  
BIN URI: BOLD:ACV4116

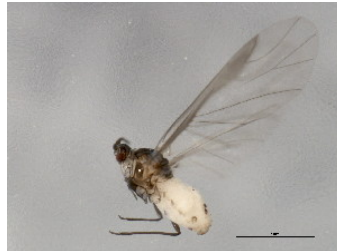

**TDWG-1098 [Lateral]**  
Eriosoma americanum  
Family: Aphididae  
BIN URI: BOLD:AAD7955

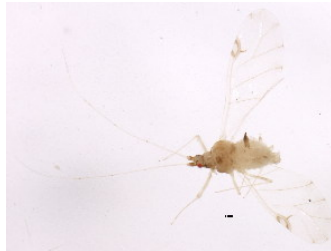

**BIOUG00658-H10 [Dorsal]**  
Drepanaphis  
Family: Aphididae  
BIN URI: BOLD:AAI6141

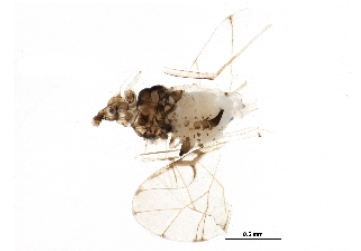

**BIOUG22574-A07 [Lateral]**  
Drepanaphis  
Family: Aphididae  
BIN URI: BOLD:ABY0945

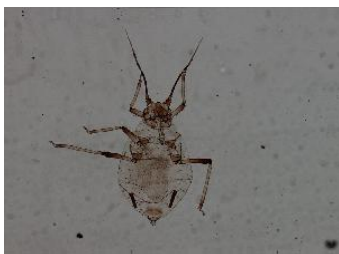

**CNC#HEM012135 [Dorsal]**  
Schizaphis scirpicola  
Family: Aphididae  
BIN URI: BOLD:AAD1238

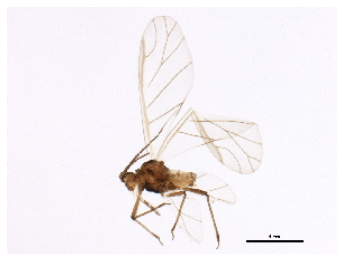

**BIOUG01652-F10 [Lateral]**  
Rhopalosiphum nymphaeae  
Family: Aphididae  
BIN URI: BOLD:AAE3554

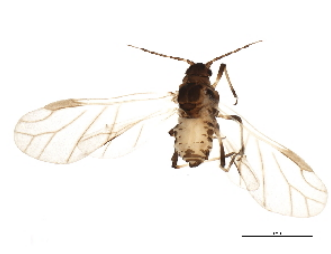

**BIOUG00856-B05 [Dorsal]**  
Aphis middletonii  
Family: Aphididae  
BIN URI: BOLD:AAB6817

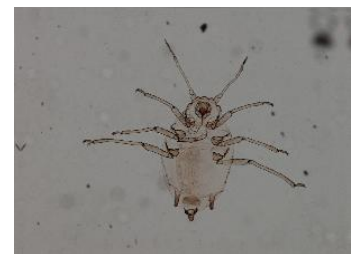

**CNC#HEM049387 [Dorsal]**  
Aphis sp. B rfg-2008  
Family: Aphididae  
BIN URI: BOLD:AAA3070

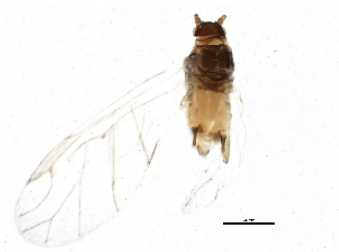

**BIOUG01308-E09 [Dorsal]**  
Aphis glycines  
Family: Aphididae  
BIN URI: BOLD:AAB7938

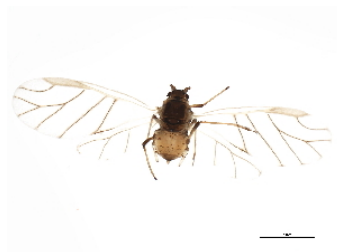

**BIOUG00856-C11 [Dorsal]**  
Lipaphis pseudobrassicae  
Family: Aphididae  
BIN URI: BOLD:AAD9153

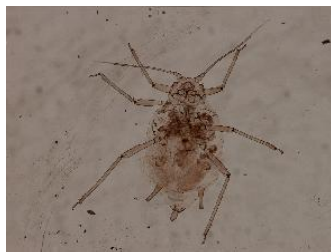

**CNC#HEM007605 [Dorsal]**  
Aphis nasturtii  
Family: Aphididae  
BIN URI: BOLD:AAC1374

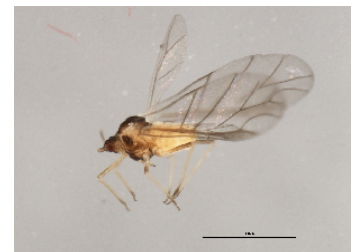

**BIOUG00999-C01 [Lateral]**  
Aphis rubicola  
Family: Aphididae  
BIN URI: BOLD:AAF7621

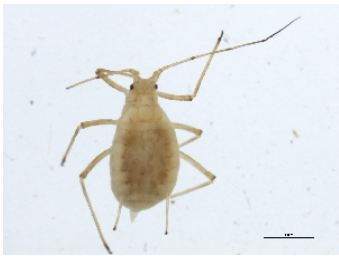

**10BBCHEM-1209 [Dorsal]**  
*Acyrthosiphon pisum*  
 Family: Aphididae  
 BIN URI: BOLD: AAB1787

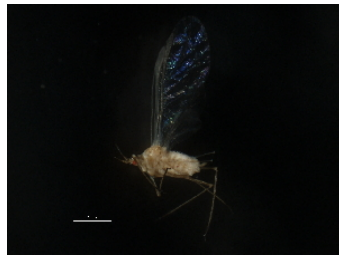

**BIOUG00783-B08 [Lateral]**  
 Hemiptera  
 BIN URI: BOLD: AAF3206

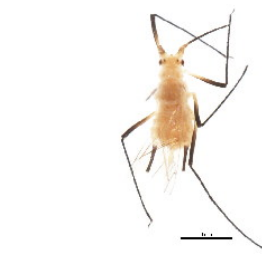

**BIOUG01012-A03 [Dorsal]**  
*Uroleucon caligatum*  
 Family: Aphididae  
 BIN URI: BOLD: AAF8501

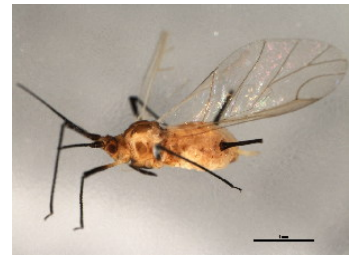

**TDWG-1192 [Lateral]**  
*Uroleucon nigrotibium*  
 Family: Aphididae  
 BIN URI: BOLD: ABY4768

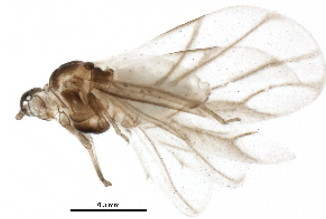

**BIOUG22082-C04 [Lateral]**  
*Melaphis rhois*  
 Family: Aphididae  
 BIN URI: BOLD: AAA2079

**IMAGE NOT AVAILABLE**

**BIOUG22082-D03**  
*Melaphis*  
 Family: Aphididae

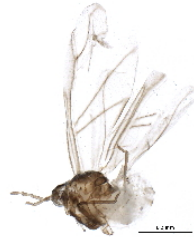

**BIOUG22082-A03 [Lateral]**  
*Melaphis*  
 Family: Aphididae  
 BIN URI: BOLD: ABZ6353

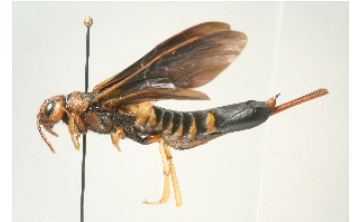

**SIR 050 [Lateral]**  
*Tremex columba*  
 Family: Siricidae  
 BIN URI: BOLD: AAC2293

**IMAGE NOT AVAILABLE**

**BIOUG24015-A03**  
 Dorylaimida

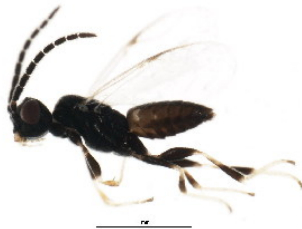

**BIOUG01252-E04 [Lateral]**  
*Gonatopus*  
 Family: Dryinidae  
 BIN URI: BOLD: ABA8070

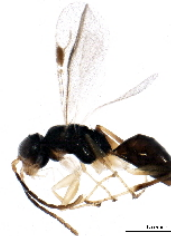

**BIOUG22458-B05 [Lateral]**  
 Dryinidae  
 Family: Dryinidae  
 BIN URI: BOLD: ACA7378

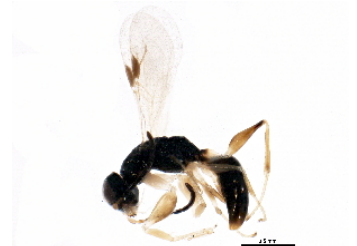

**BIOUG22862-H09 [Lateral]**  
 Anteon  
 Family: Dryinidae  
 BIN URI: BOLD: ACV4994

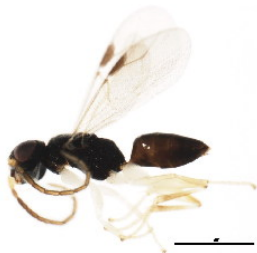

**BIOUG01049-H10 [Lateral]**  
 Anteoninae  
 Family: Dryinidae  
 BIN URI: BOLD: AAU8737

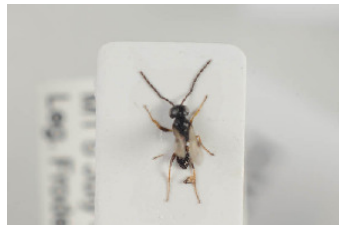

**HYMNI800 [Dorsal]**  
*Anteon cameroni*  
 Family: Dryinidae  
 BIN URI: BOLD: AAU8713

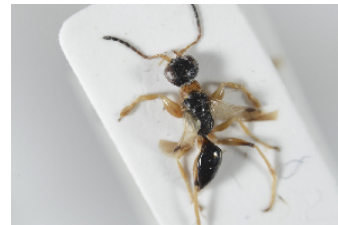

**HYMNI396 [Dorsal]**  
*Anteon gaullei*  
 Family: Dryinidae  
 BIN URI: BOLD: ABA7952

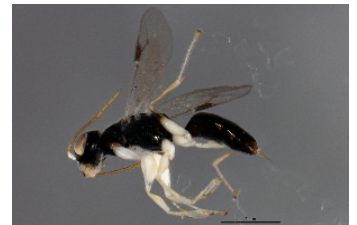

**09BBEHY-1628 [Lateral]**  
 Dryinidae  
 Family: Dryinidae  
 BIN URI: BOLD: AAM7445

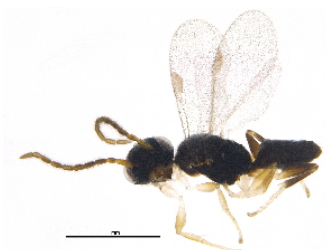

**BIOUG21129-E05 [Lateral]**  
 Hymenoptera  
 BIN URI: BOLD: ACU6678

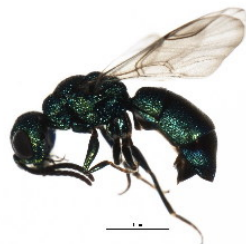

**BIOUG01252-H04 [Lateral]**  
*Pseudomalus auratus*  
 Family: Chrysididae  
 BIN URI: BOLD: AAL7396

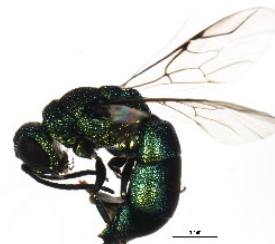

**BIOUG01113-G07 [Lateral]**  
 Chrysis  
 Family: Chrysididae  
 BIN URI: BOLD: ABA5910

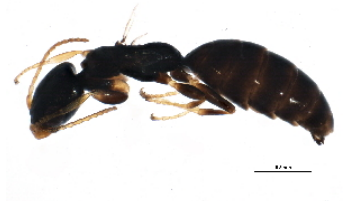

**BIOUG08152-D02 [Lateral]**  
 Bethyliidae  
 Family: Bethyliidae  
 BIN URI: BOLD: ACJ5404

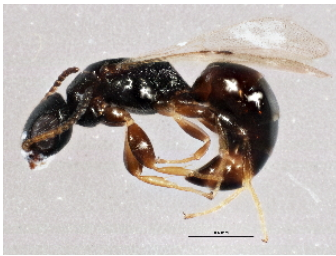

**BIOUG02772-D11 [Lateral]**  
Coniozus  
Family: Bethyridae  
BIN URI: BOLD:ABW3217

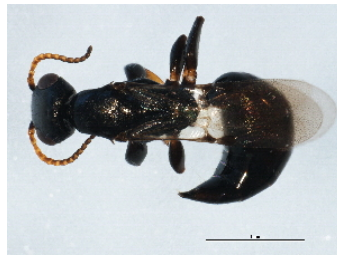

**BIOUG01596-A01 [Dorsal]**  
Bethyridae  
Family: Bethyridae  
BIN URI: BOLD:ABV2666

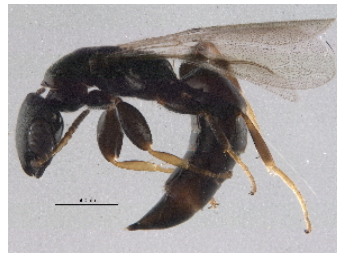

**BIOUG06546-D12 [Lateral]**  
Bethyridae  
Family: Bethyridae  
BIN URI: BOLD:ACI4207

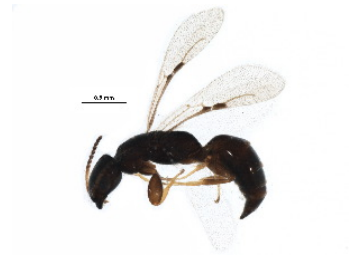

**BIOUG22294-A01 [Lateral]**  
Bethyridae  
Family: Bethyridae  
BIN URI: BOLD:ABW3215

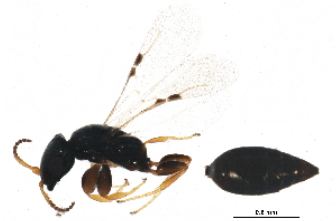

**BIOUG24015-E07 [Lateral]**  
Bethyridae  
Family: Bethyridae

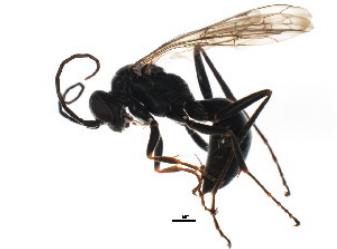

**BIOUG01076-F03 [Lateral]**  
Pompilidae  
Family: Pompilidae  
BIN URI: BOLD:AAN7892

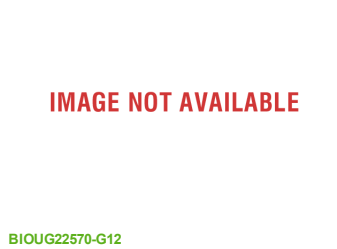

**BIOUG22570-G12**  
Pompilidae  
Family: Pompilidae

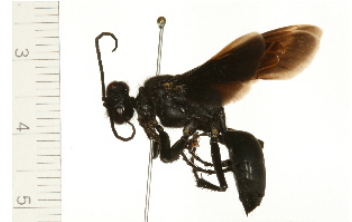

**08MZPP-037 [Lateral]**  
Sphecidae  
Family: Sphecidae  
BIN URI: BOLD:AAG7748

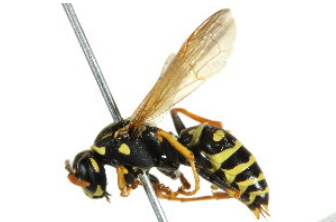

**BIOUG01081-A10 [Lateral]**  
Polistes dominula  
Family: Vespidae  
BIN URI: BOLD:AAB7105

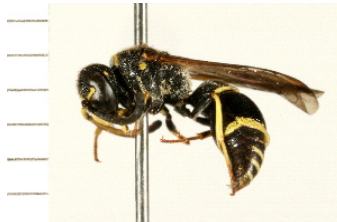

**HYMN 0136.02 [Lateral]**  
Parancistrocerus pensylvanicus  
Family: Vespidae  
BIN URI: BOLD:AAD5749

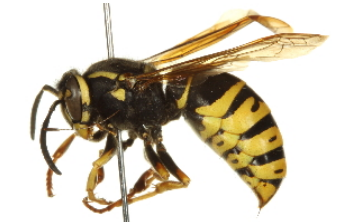

**BIOUG07541-H03 [Lateral]**  
Vespula vidua  
Family: Vespidae  
BIN URI: BOLD:AAN8137

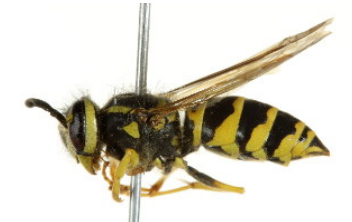

**BIOUG01081-H11 [Lateral]**  
Vespula maculifrons  
Family: Vespidae  
BIN URI: BOLD:AAD5593

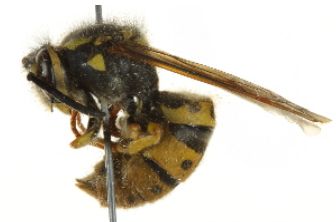

**CCDB-15177-H02 [Lateral]**  
Vespula germanica  
Family: Vespidae  
BIN URI: BOLD:AAG9055

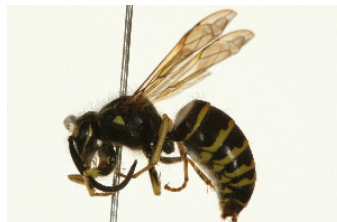

**09BBEHY-0045 [Lateral]**  
Dolichovespula arenaria  
Family: Vespidae  
BIN URI: BOLD:ACE9710

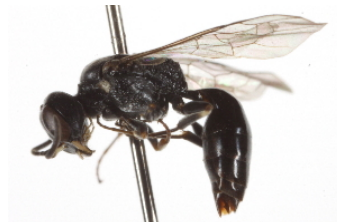

**BIOUG07541-G11 [Lateral]**  
Passaloecus cuspidatus  
Family: Crabronidae  
BIN URI: BOLD:AAG7762

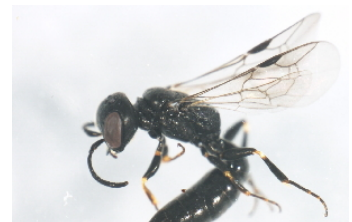

**BIOUG01029-G03 [Lateral]**  
Passaloecus singularis  
Family: Crabronidae  
BIN URI: BOLD:AAM4998

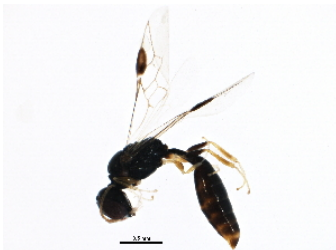

**BIOUG23188-B12 [Lateral]**  
Stigmus  
Family: Crabronidae  
BIN URI: BOLD:ACV6895

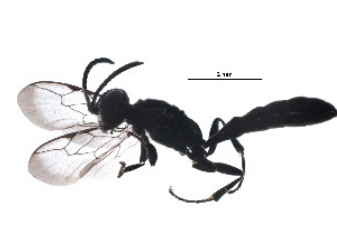

**BIOUG22567-C08 [Lateral]**  
Trypoxylon frigidum  
Family: Crabronidae  
BIN URI: BOLD:AAG3193

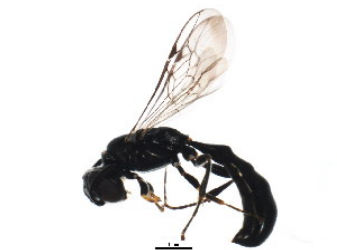

**BIOUG01259-C03 [Lateral]**  
Trypoxylon kostylevi  
Family: Crabronidae  
BIN URI: BOLD:AAN3726

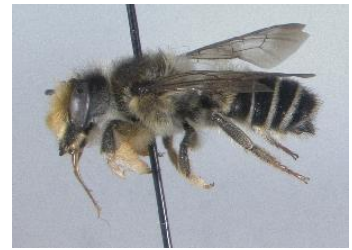

**Bee13 [Lateral]**  
Megachile pugnata  
Family: Megachilidae  
BIN URI: BOLD:AAC8596

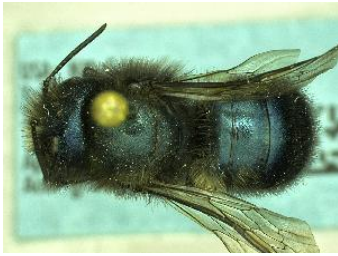

**Cave 2 [Dorsal]**  
*Osmia lignaria*  
 Family: Megachilidae  
 BIN URI: BOLD:AAE5495

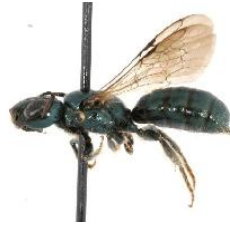

**GUE06-BEES-166 [Lateral]**  
*Ceratina calcarata*  
 Family: Apidae  
 BIN URI: BOLD:AAA2368

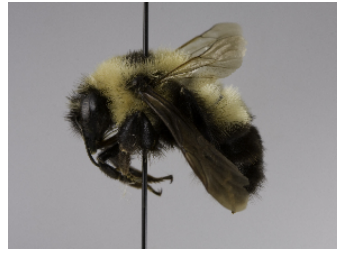

**CCDB-01556 A11 [Lateral]**  
*Bombus rufocinctus*  
 Family: Apidae  
 BIN URI: BOLD:AAB0152

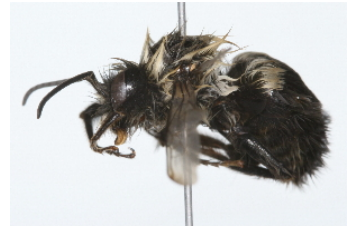

**08TTML-0290 [Lateral]**  
*Bombus impatiens*  
 Family: Apidae  
 BIN URI: BOLD:ABZ2516

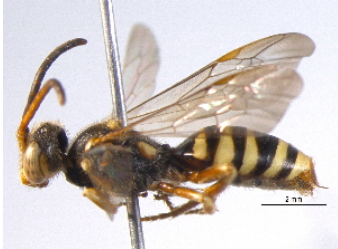

**BIOUG05619-E09 [Lateral]**  
*Nomada subrutila*  
 Family: Apidae  
 BIN URI: BOLD:AAC5044

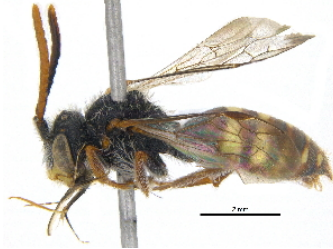

**BIOUG21484-F07 [Lateral]**  
*Nomada bella*  
 Family: Apidae  
 BIN URI: BOLD:ABZ2527

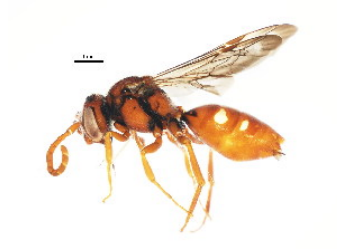

**BIOUG00801-D11 [Lateral]**  
*Nomada sp. 5*  
 Family: Apidae  
 BIN URI: BOLD:AAI3547

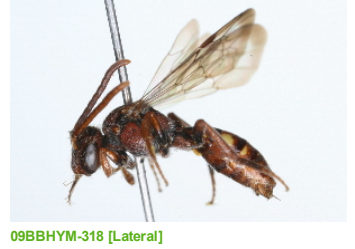

**09BBHYM-318 [Lateral]**  
*Nomada pygmaea*  
 Family: Apidae  
 BIN URI: BOLD:ABZ6834

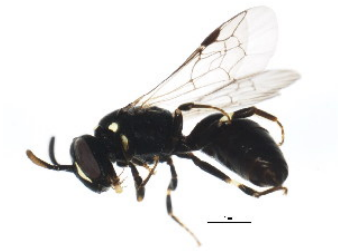

**BIOUG01034-H04 [Lateral]**  
*Hylaeus modestus*  
 Family: Colletidae  
 BIN URI: BOLD:AAB2744

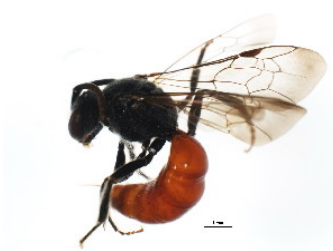

**BIOUG01030-D08 [Lateral]**  
*Sphecodes ranunculi*  
 Family: Halictidae  
 BIN URI: BOLD:AAC7655

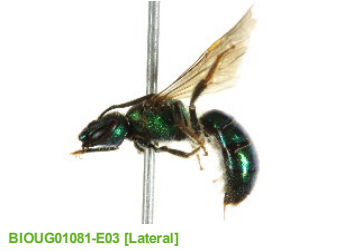

**BIOUG01081-E03 [Lateral]**  
*Augochlora pura*  
 Family: Halictidae  
 BIN URI: BOLD:AAD6445

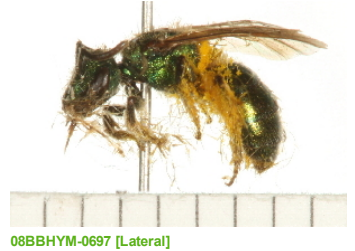

**08BBHYM-0697 [Lateral]**  
*Augochlorella*  
 Family: Halictidae  
 BIN URI: BOLD:AAG0449

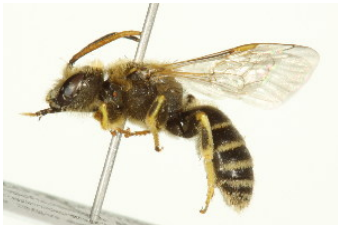

**TDWG-0138 [Lateral]**  
*Halictus ligatus*  
 Family: Halictidae  
 BIN URI: BOLD:AAA1257

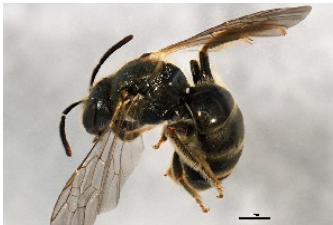

**ASGLE-1011 [Lateral]**  
*Halictus confusus*  
 Family: Halictidae  
 BIN URI: BOLD:AAA2139

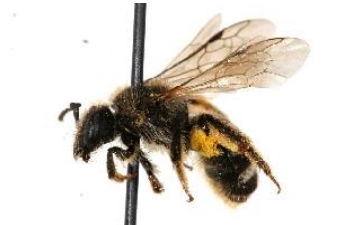

**GUE06-BEES-271 [Lateral]**  
*Lasioglossum leucozonium*  
 Family: Halictidae  
 BIN URI: BOLD:AAA2322

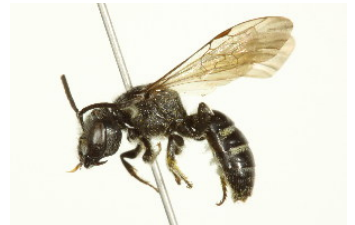

**TDWG-0154 [Lateral]**  
*Lasioglossum coriaceum*  
 Family: Halictidae  
 BIN URI: BOLD:AAB7007

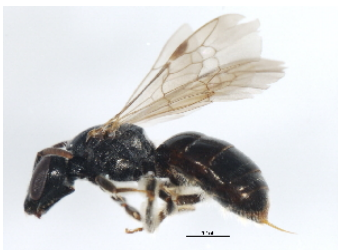

**09BBEY-0213 [Lateral]**  
*Lasioglossum divergens*  
 Family: Halictidae  
 BIN URI: BOLD:AAB8845

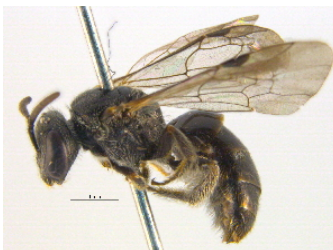

**BIOUG03373-F07 [Lateral]**  
*Lasioglossum birkmanni*  
 Family: Halictidae  
 BIN URI: BOLD:AAC8293

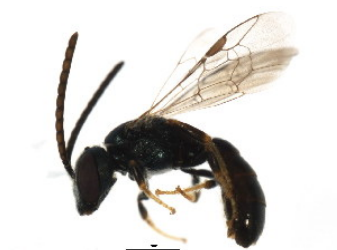

**BIOUG01285-B10 [Lateral]**  
*Lasioglossum anomalum*  
 Family: Halictidae  
 BIN URI: BOLD:AAA7868

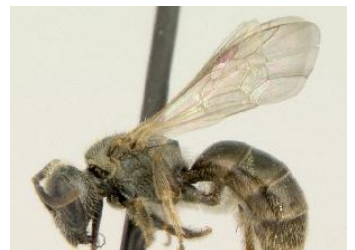

**DIAL0294F01-PA [Lateral]**  
*Lasioglossum weemsi*  
 Family: Halictidae

BIN URI: BOLD:AAA3782

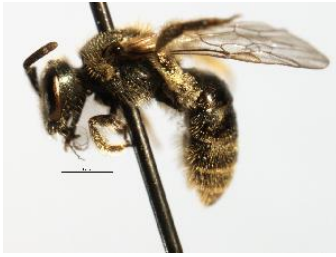

**Cp 2007 - 103 [Lateral]**  
Lasioglossum  
Family: Halictidae  
BIN URI: BOLD:ABZ0652

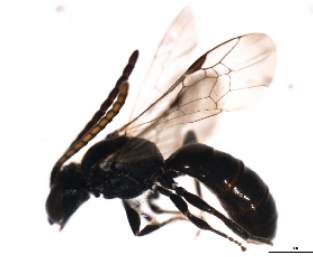

**09BBEHY-1826 [Lateral]**  
Lasioglossum versans  
Family: Halictidae  
BIN URI: BOLD:ABZ6180

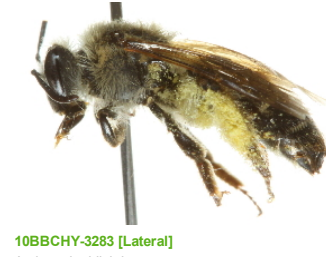

**10BBCHY-3283 [Lateral]**  
Andrena barbilabris  
Family: Andrenidae  
BIN URI: BOLD:AAB4998

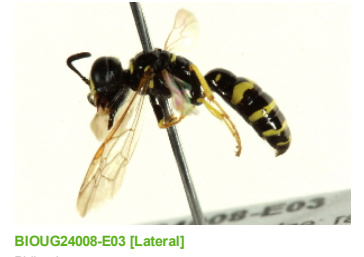

**BIOUG24008-E03 [Lateral]**  
Philanthus  
Family: Crabronidae

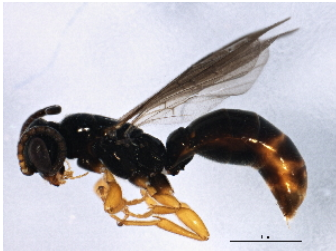

**BIOUG01839-E07 [Lateral]**  
Xiphydriidae  
Family: Xiphydriidae  
BIN URI: BOLD:ABY1179

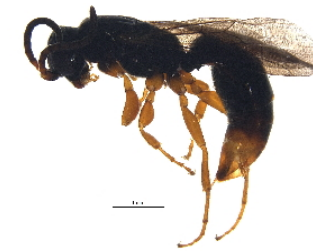

**BIOUG08748-F07 [Lateral]**  
Hymenoptera  
BIN URI: BOLD:ACL5424

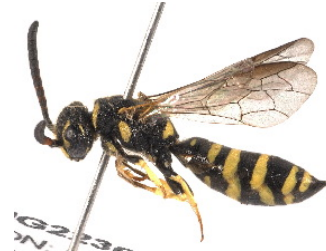

**BIOUG22360-G05 [Lateral]**  
Sapyga centrata  
Family: Sapygidae  
BIN URI: BOLD:ACL7820

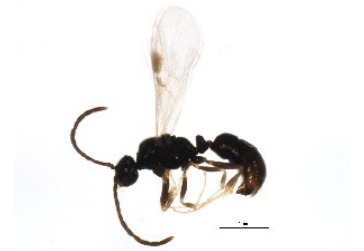

**BIOUG01285-G12 [Lateral]**  
Ponera pennsylvanica  
Family: Formicidae  
BIN URI: BOLD:AAF0443

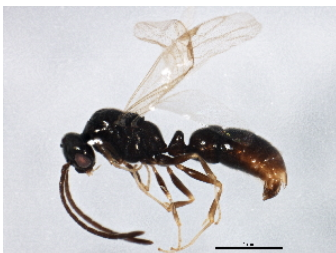

**BIOUG01795-G10 [Lateral]**  
Hypoponera  
Family: Formicidae  
BIN URI: BOLD:ACU4160

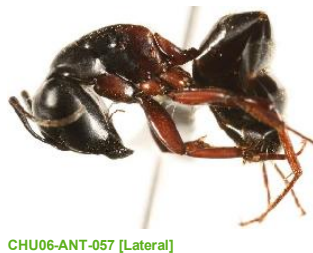

**CHU06-ANT-057 [Lateral]**  
Camponotus herculeanus  
Family: Formicidae  
BIN URI: BOLD:AAA2372

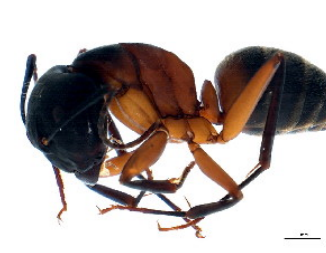

**TDWG-0455 [Lateral]**  
Camponotus pennsylvanicus  
Family: Formicidae  
BIN URI: BOLD:AAA9461

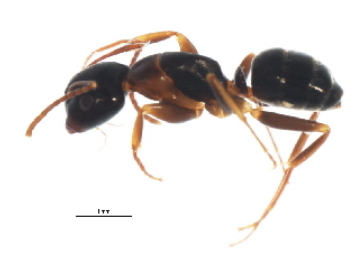

**PCPP10-0474 [Lateral]**  
Camponotus americanus  
Family: Formicidae  
BIN URI: BOLD:AAD4432

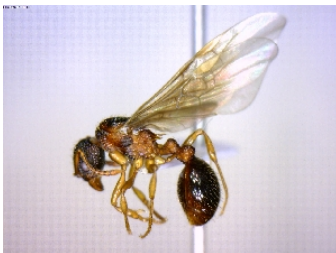

**BIOUG02018-D10 [Lateral]**  
Myrmica detritinodis  
Family: Formicidae  
BIN URI: BOLD:AAA1841

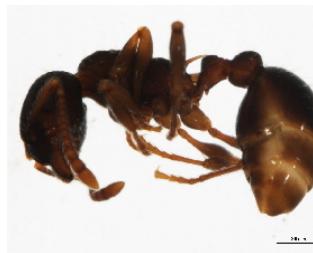

**09BBEFO-0186 [Lateral]**  
Myrmica cf. fracticornis  
Family: Formicidae  
BIN URI: BOLD:AAA1863

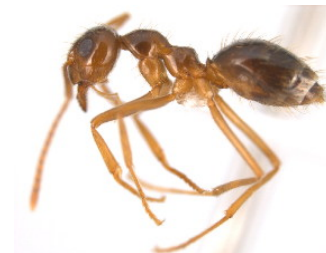

**09GUANTS-304 [Lateral]**  
Prenolepis imparis  
Family: Formicidae  
BIN URI: BOLD:AAC1302

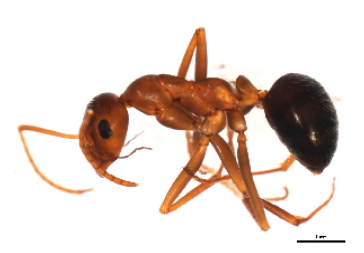

**10BBUFO-0221 [Lateral]**  
Formica  
Family: Formicidae  
BIN URI: BOLD:AAA1467

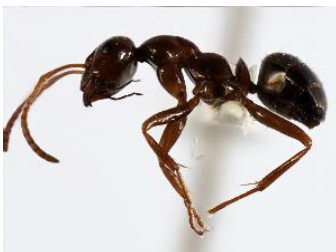

**MAS036-07 [Lateral]**  
Formica  
Family: Formicidae  
BIN URI: BOLD:AAE0406

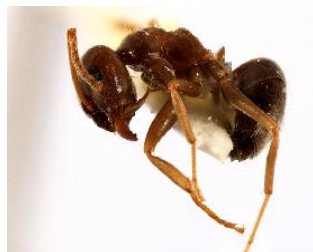

**MAS206-07 [Lateral]**  
Lasius  
Family: Formicidae  
BIN URI: BOLD:AAA9048

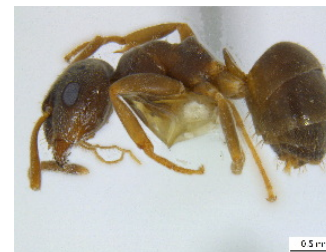

**BIOUG06760-F01 [Lateral]**  
Lasius alienus  
Family: Formicidae  
BIN URI: BOLD:AAA9049

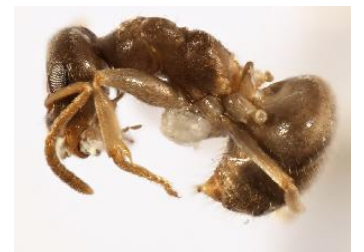

**MAS145-07 [Lateral]**  
Lasius neoniger  
Family: Formicidae  
BIN URI: BOLD:AAB9126

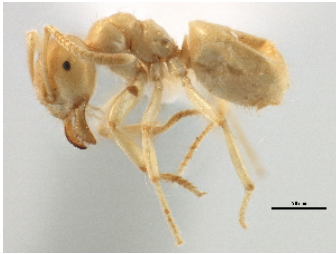

CCDB-21409-G07 [Lateral]  
*Lasius nearcticus*  
Family: Formicidae  
BIN URI: BOLD:AAD1528

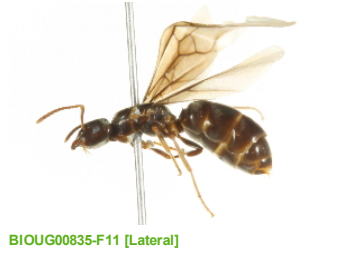

BIOUG00835-F11 [Lateral]  
*Lasius umbratus*  
Family: Formicidae  
BIN URI: BOLD:AAE1553

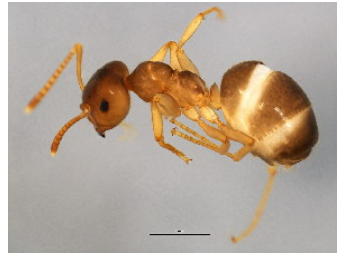

ASGLE-0021 [Lateral]  
*Lasius*  
Family: Formicidae  
BIN URI: BOLD:AAI1292

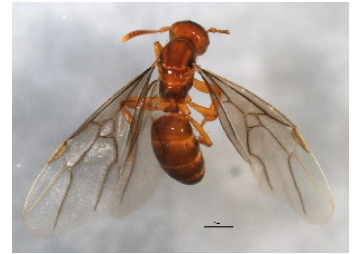

ASGLE-0014 [Dorsal]  
*Lasius*  
Family: Formicidae  
BIN URI: BOLD:AAF0890

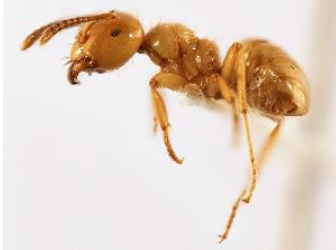

MAS186-07 [Lateral]  
*Lasius*  
Family: Formicidae  
BIN URI: BOLD:ABY9254

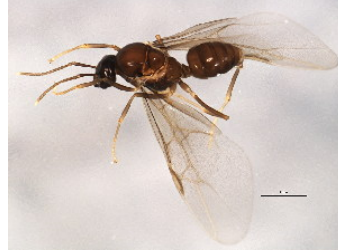

ASGLE-0071 [Lateral]  
*Lasius*  
Family: Formicidae  
BIN URI: BOLD:ACW1526

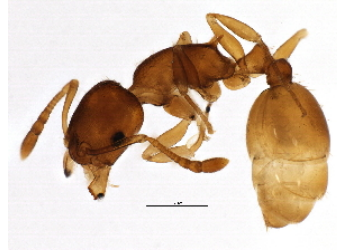

BIOUG11767-G08 [Lateral]  
*Temnothorax*  
Family: Formicidae  
BIN URI: BOLD:AAG0685

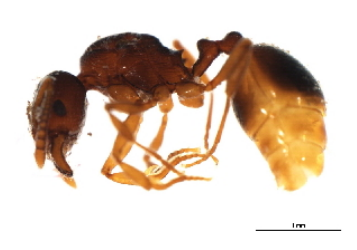

09GUANTS-208 [Lateral]  
*Stenamma*  
Family: Formicidae  
BIN URI: BOLD:AAH7068

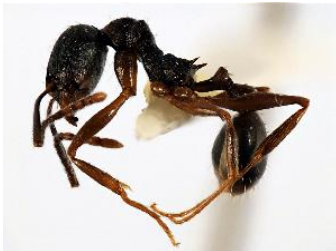

MAS205-07 [Lateral]  
*Aphaenogaster*  
Family: Formicidae  
BIN URI: BOLD:AAD1929

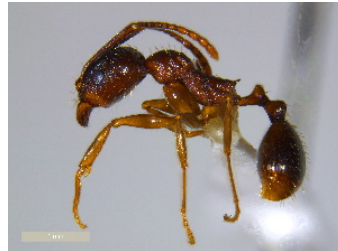

JJ-04-01 [Lateral]  
*Aphaenogaster rudis-texana*  
Family: Formicidae  
BIN URI: BOLD:AAD1927

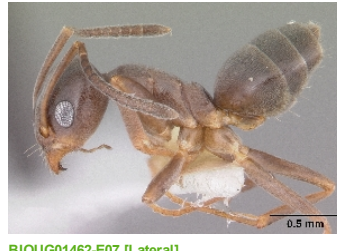

BIOUG01462-E07 [Lateral]  
*Tapinoma sessile*  
Family: Formicidae  
BIN URI: BOLD:AAA3898

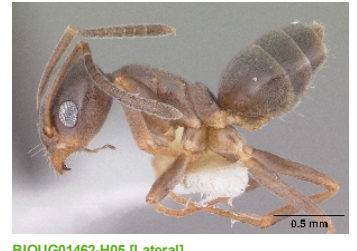

BIOUG01462-H05 [Lateral]  
*Tapinoma sessile*  
Family: Formicidae  
BIN URI: BOLD:AAA3900

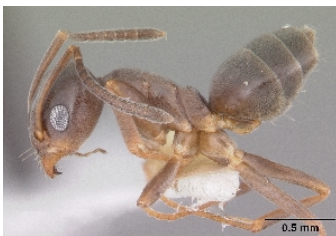

BIOUG01809-B01 [Lateral]  
*Tapinoma sessile*  
Family: Formicidae  
BIN URI: BOLD:AAA3893

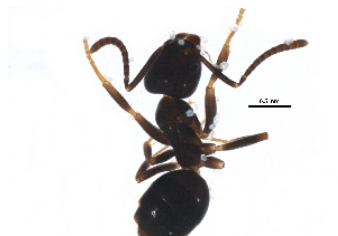

BIOUG24003-A02 [Dorsal]  
*Tapinoma*  
Family: Formicidae

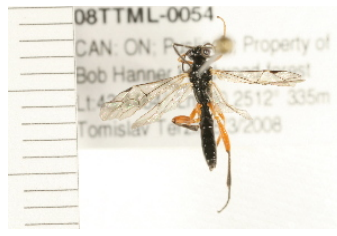

08TTML-0054 [Dorsal]  
*Cylloceria melancholica*  
Family: Ichneumonidae  
BIN URI: BOLD:AAG7628

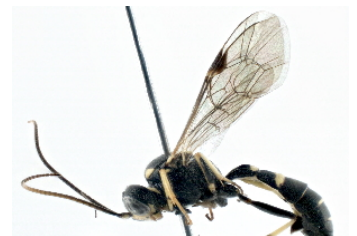

BIOUG04179-B07 [Lateral]  
*Exenterus confusus*  
Family: Ichneumonidae  
BIN URI: BOLD:AAL5084

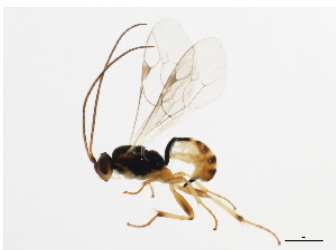

BIOUG00764-C10 [Lateral]  
*Mesochorus*  
Family: Ichneumonidae  
BIN URI: BOLD:AAM7412

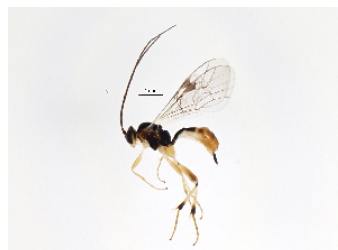

BIOUG00845-D06 [Lateral]  
*Mesochorus suomiensis*  
Family: Ichneumonidae  
BIN URI: BOLD:AAZ1979

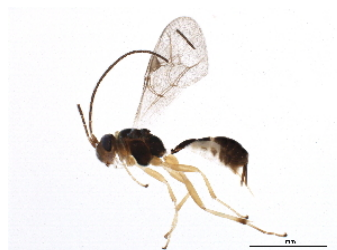

BIOUG10225-H05 [Lateral]  
*Mesochorus*  
Family: Ichneumonidae  
BIN URI: BOLD:ACG5789

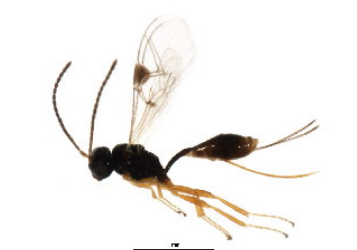

BIOUG01285-C06 [Lateral]  
*Tersilochinae*  
Family: Ichneumonidae  
BIN URI: BOLD:ABA9842

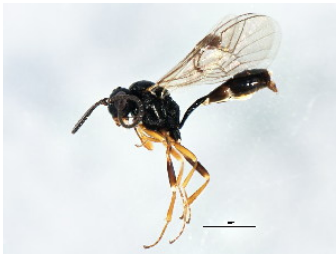

**BIOUG00786-D09 [Lateral]**  
Tersilochinae  
Family: Ichneumonidae  
BIN URI: BOLD:AAU8481

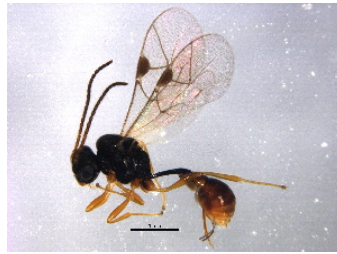

**BIOUG10906-C03 [Lateral]**  
Tersilochinae  
Family: Ichneumonidae  
BIN URI: BOLD:ACL9152

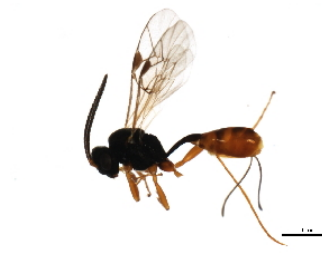

**10PHMAL-1889 [Lateral]**  
Tersilochinae  
Family: Ichneumonidae  
BIN URI: BOLD:AAU8328

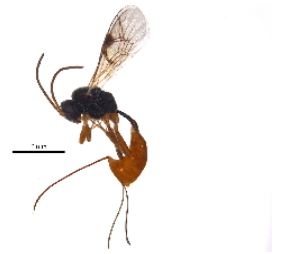

**BIOUG22565-B11 [Lateral]**  
Tersilochinae  
Family: Ichneumonidae  
BIN URI: BOLD:ACV2273

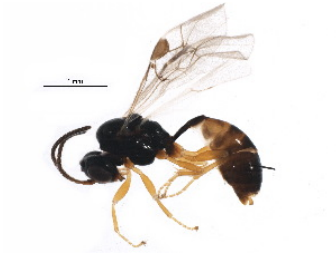

**BIOUG22421-D08 [Lateral]**  
Tersilochinae  
Family: Ichneumonidae  
BIN URI: BOLD:ACV3286

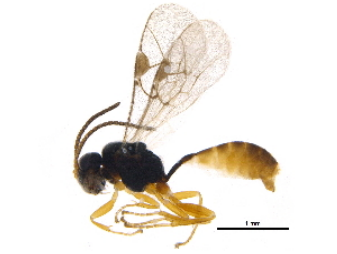

**BIOUG22287-B01 [Lateral]**  
Tersilochinae  
Family: Ichneumonidae  
BIN URI: BOLD:ABA6274

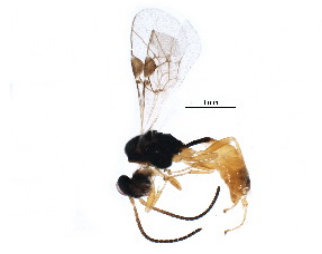

**BIOUG22470-A03 [Lateral]**  
Ichneumonidae  
Family: Ichneumonidae  
BIN URI: BOLD:ACH0608

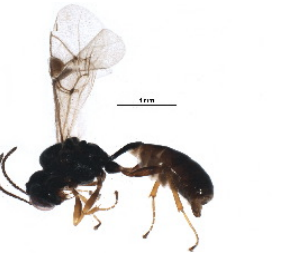

**BIOUG22470-B05 [Lateral]**  
Ichneumonidae  
Family: Ichneumonidae  
BIN URI: BOLD:ACV3460

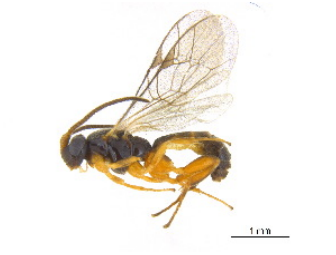

**BIOUG06752-D09 [Lateral]**  
Hymenoptera  
BIN URI: BOLD:AAM9125

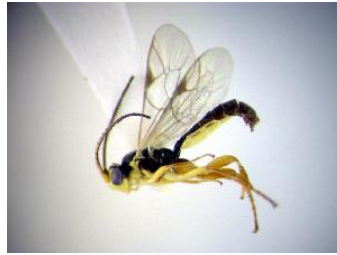

**06-PROBE-3249 [Lateral]**  
Orthocentrus jft09  
Family: Ichneumonidae  
BIN URI: BOLD:AAB1188

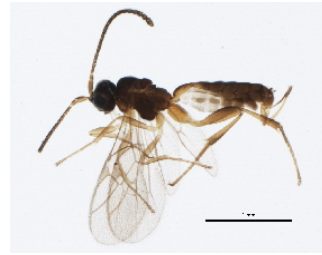

**10PHMAL-3281 [Lateral]**  
Stenomacrus  
Family: Ichneumonidae  
BIN URI: BOLD:AAU8210

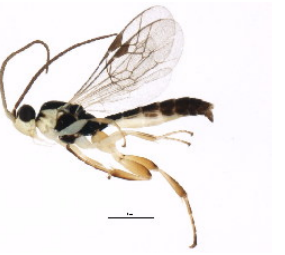

**BIOUG00914-G06 [Lateral]**  
Hymenoptera  
BIN URI: BOLD:AAU8604

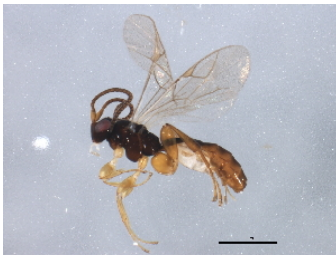

**BIOUG01572-C03 [Lateral]**  
Stenomacrus jft14  
Family: Ichneumonidae  
BIN URI: BOLD:AAJ5372

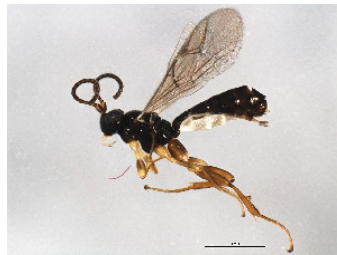

**ASGLE-0532 [Lateral]**  
Hymenoptera  
BIN URI: BOLD:AAM7494

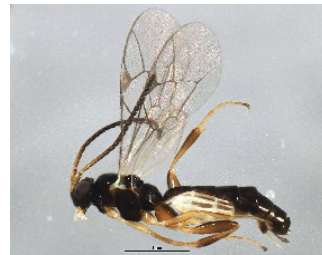

**ASGLE-0907 [Lateral]**  
Hymenoptera  
BIN URI: BOLD:AAP6689

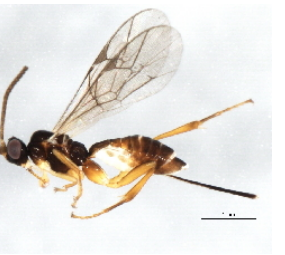

**ASGLE2-0197 [Lateral]**  
Hymenoptera  
BIN URI: BOLD:AAU8746

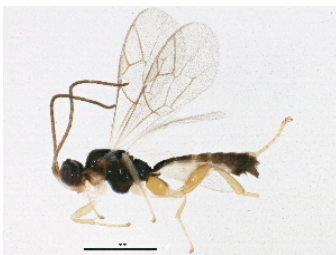

**BIOUG03770-C03 [Lateral]**  
Orthocentrinae  
Family: Ichneumonidae  
BIN URI: BOLD:ACB2448

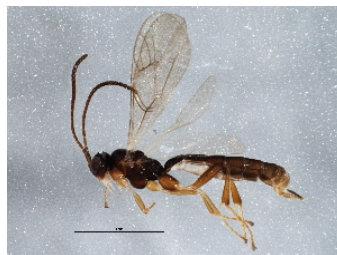

**BIOUG04435-D03 [Lateral]**  
Leipaulus  
Family: Ichneumonidae  
BIN URI: BOLD:ACC8246

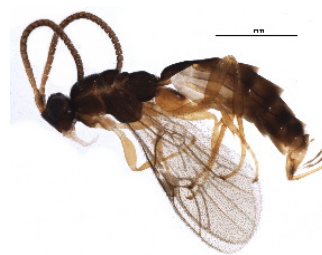

**BIOUG22867-B11 [Lateral]**  
Orthocentrinae  
Family: Ichneumonidae  
BIN URI: BOLD:AAG0973

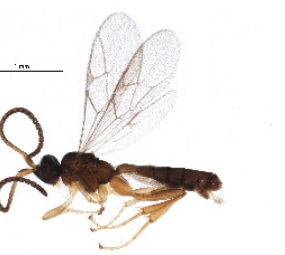

**BIOUG22453-F03 [Lateral]**  
Orthocentrinae  
Family: Ichneumonidae  
BIN URI: BOLD:ACD9088



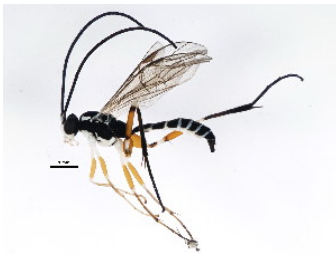

**BIOUG00801-H02 [Lateral]**  
*Phytodietus vulgaris*  
 Family: Ichneumonidae  
 BIN URI: BOLD: AAG0379

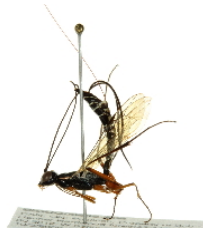

**BIOUG00858-A08 [Lateral]**  
*Podoschistus vittifrons*  
 Family: Ichneumonidae  
 BIN URI: BOLD: AAL0380

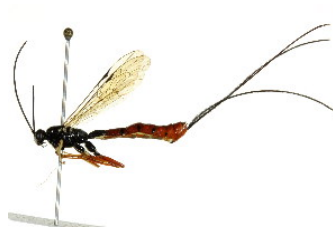

**BIOUG01023-A11 [Lateral]**  
*Dolichomitus irritator*  
 Family: Ichneumonidae  
 BIN URI: BOLD: AAU8680

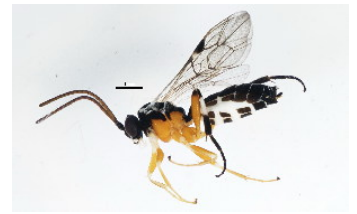

**BIOUG00823-G10 [Lateral]**  
*Diplazon*  
 Family: Ichneumonidae  
 BIN URI: BOLD: AAD1879

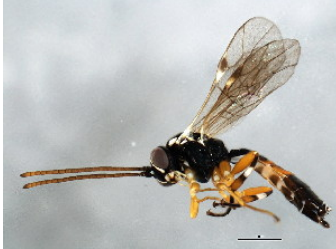

**ASGLE-0955 [Lateral]**  
 Hymenoptera  
 BIN URI: BOLD: AAD4214

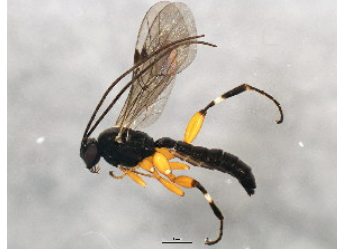

**ASGLE-1025 [Lateral]**  
 Hymenoptera  
 BIN URI: BOLD: AAD5194

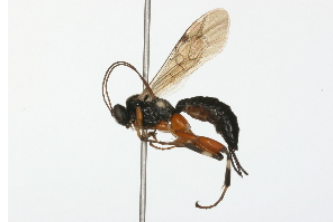

**08TTML-0408 [Lateral]**  
*Pimpla*  
 Family: Ichneumonidae  
 BIN URI: BOLD: AAG0387

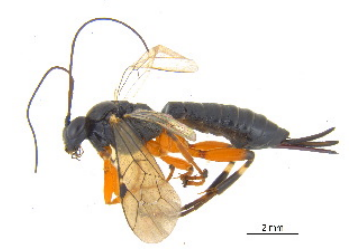

**BIOUG06752-D05 [Lateral]**  
 Hymenoptera  
 BIN URI: BOLD: AAG7634

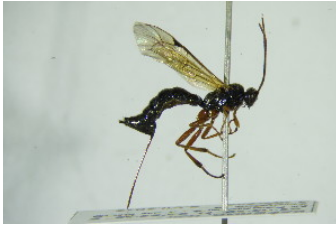

**BC ZSM HYM 20692 [Lateral]**  
*Endromopoda detrita*  
 Family: Ichneumonidae  
 BIN URI: BOLD: AAD5195

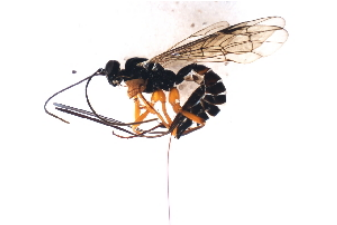

**09BBEHY-1405 [Lateral]**  
*Coleocentrus*  
 Family: Ichneumonidae  
 BIN URI: BOLD: AAJ6986

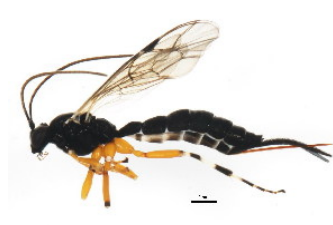

**BIOUG01032-B03 [Lateral]**  
*Iseropus stercorator*  
 Family: Ichneumonidae  
 BIN URI: BOLD: AAO2094

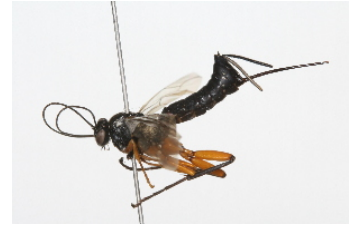

**08TTML-0369 [Lateral]**  
*Pimpla pedalis*  
 Family: Ichneumonidae  
 BIN URI: BOLD: AAD5192

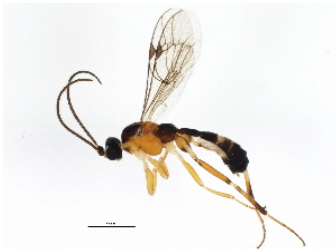

**BIOUG03930-A04 [Lateral]**  
 Orthocentrinae  
 Family: Ichneumonidae  
 BIN URI: BOLD: AAG0953

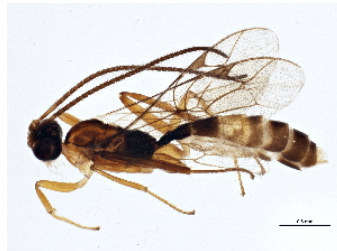

**BIOUG03336-F06 [Lateral]**  
*Megastylus*  
 Family: Ichneumonidae  
 BIN URI: BOLD: ACE4233

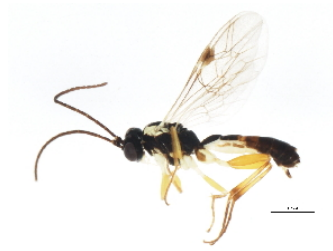

**PCPP10-0497 [Lateral]**  
*Syrphoctonus*  
 Family: Ichneumonidae  
 BIN URI: BOLD: AAU8212

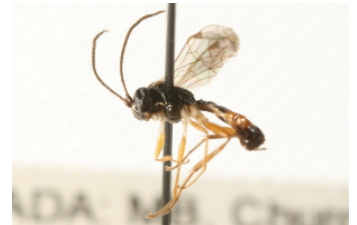

**07PROBE-23120 [Lateral]**  
*Sussaba cognata*  
 Family: Ichneumonidae  
 BIN URI: BOLD: AAH1764

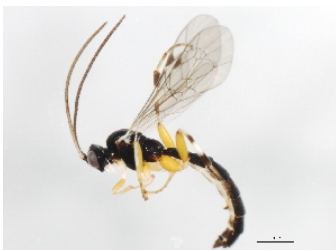

**09BBHYM-646 [Lateral]**  
*Zaglyptus varipes*  
 Family: Ichneumonidae  
 BIN URI: BOLD: AAG0382

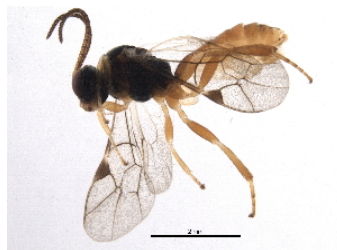

**BIOUG10971-G12 [Lateral]**  
 Tryphoninae  
 Family: Ichneumonidae  
 BIN URI: BOLD: AAU8749

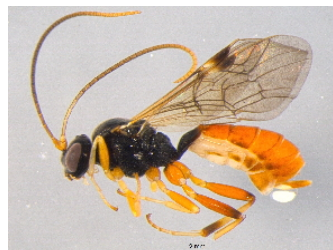

**BIOUG02861-A09 [Lateral]**  
 Tryphoninae  
 Family: Ichneumonidae  
 BIN URI: BOLD: AAM7520

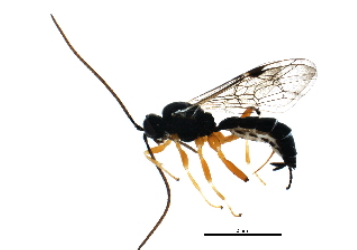

**BIOUG22569-G06 [Lateral]**  
*Polyblastus*  
 Family: Ichneumonidae  
 BIN URI: BOLD: ACF4348

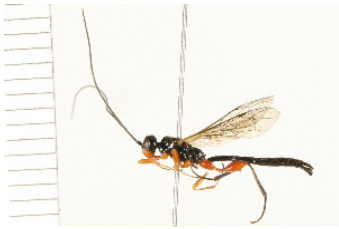

08TTML-0244 [Lateral]

Odontocolon  
Family: Ichneumonidae  
BIN URI: BOLD:AAG7690

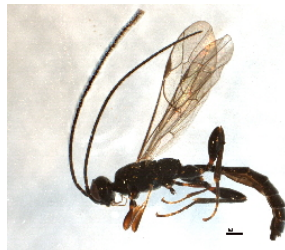

BIOUG09981-A05 [Lateral]

Odontocolon  
Family: Ichneumonidae  
BIN URI: BOLD:ACL3751

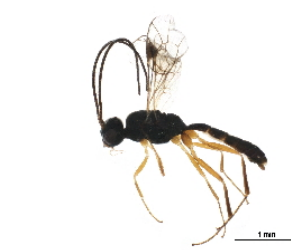

BIOUG24015-D01 [Lateral]

Ichneumonidae  
Family: Ichneumonidae

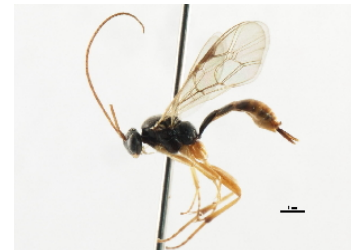

CNCHYM 03729 [Lateral]

Astiphomma strenuum  
Family: Ichneumonidae  
BIN URI: BOLD:AAA5522

IMAGE NOT AVAILABLE

BIOUG22872-H01

Ichneumonidae  
Family: Ichneumonidae

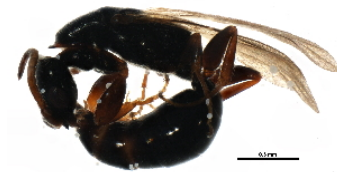

BIOUG22358-A07 [Lateral]

Bethylidae  
Family: Bethyidae  
BIN URI: BOLD:ABY2749

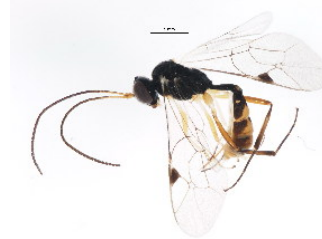

BIOUG00859-B08 [Lateral]

Cryptinae  
Family: Ichneumonidae  
BIN URI: BOLD:AAV6844

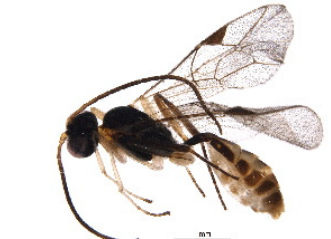

BIOUG21888-A05 [Lateral]

Ichneumonidae  
Family: Ichneumonidae  
BIN URI: BOLD:ACV5004

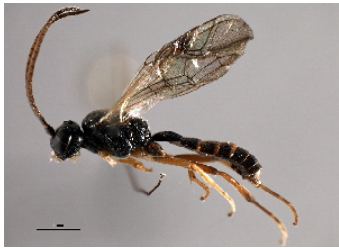

07PROBE-22704 [Lateral]

Eridolius  
Family: Ichneumonidae  
BIN URI: BOLD:ACN9868

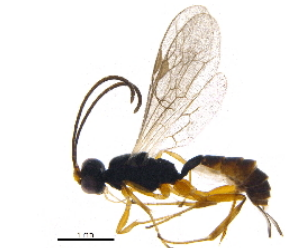

BIOUG22867-C05 [Lateral]

Ichneumonidae  
Family: Ichneumonidae  
BIN URI: BOLD:ACV5916

IMAGE NOT AVAILABLE

BIOUG22569-G09

Ichneumonidae  
Family: Ichneumonidae

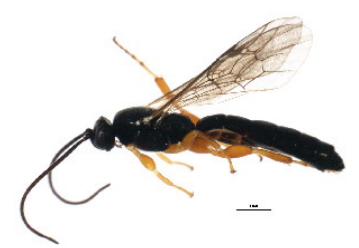

BIOUG00910-G08 [Lateral]

Hymenoptera  
BIN URI: BOLD:AAG7713

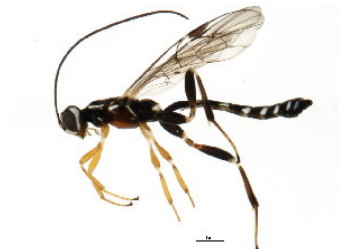

BIOUG01044-F01 [Lateral]

Xoridinae  
Family: Ichneumonidae  
BIN URI: BOLD:AAZ0238

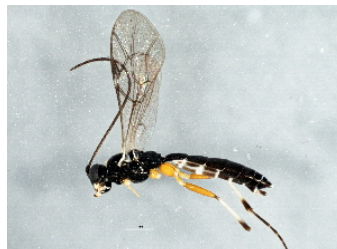

BIOUG04241-G02 [Lateral]

Ctenopelmatinae  
Family: Ichneumonidae  
BIN URI: BOLD:ACD9155

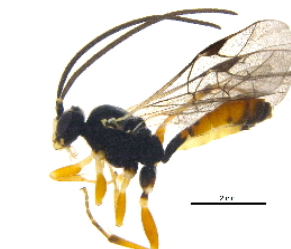

BIOUG22870-C12 [Lateral]

Ichneumonidae  
Family: Ichneumonidae  
BIN URI: BOLD:ACV5377

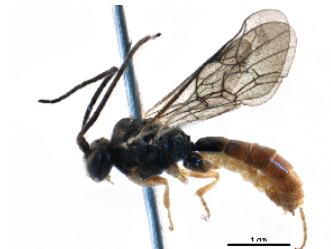

BIOUG24004-F08 [Lateral]

Ichneumonidae  
Family: Ichneumonidae

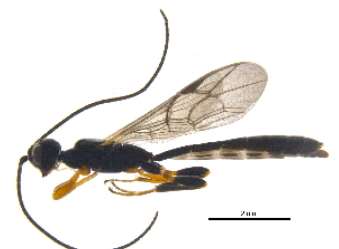

BIOUG22875-G12 [Lateral]

Ichneumonidae  
Family: Ichneumonidae  
BIN URI: BOLD:ACV5720

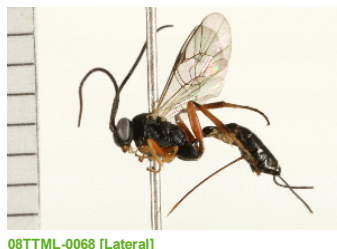

08TTML-0068 [Lateral]

Campopleginae  
Family: Ichneumonidae  
BIN URI: BOLD:AAG7642

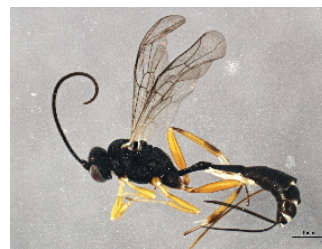

BIOUG02736-D11 [Lateral]

Campopleginae  
Family: Ichneumonidae  
BIN URI: BOLD:AAH1903

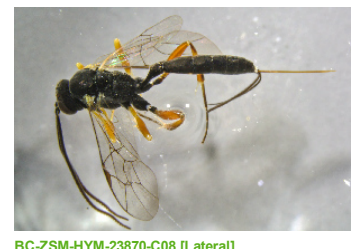

BC-ZSM-HYM-23870-C08 [Lateral]

Ichneumonidae  
Family: Ichneumonidae  
BIN URI: BOLD:ACU0916

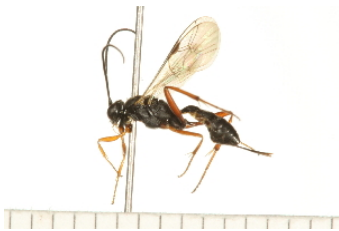

08BBHYM-0675 [Lateral]

*Tranosema rostrale*  
Family: Ichneumonidae  
BIN URI: BOLD:AAH1884

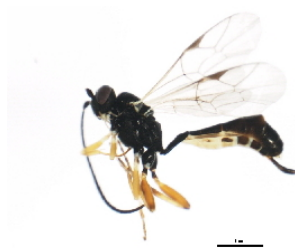

BIOUG01029-G07 [Lateral]

Ichneumonidae  
Family: Ichneumonidae  
BIN URI: BOLD:ABA5942

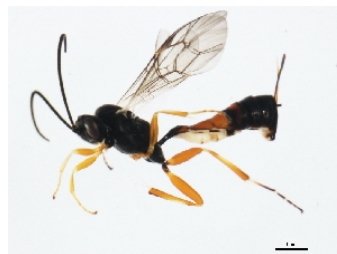

BIOUG01022-C11 [Lateral]

Campopleginae  
Family: Ichneumonidae  
BIN URI: BOLD:ABA6297

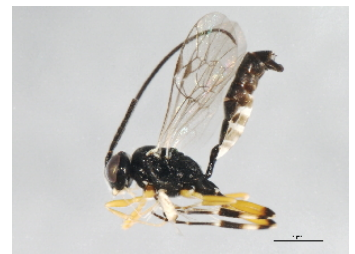

09BBEHY-0716 [Lateral]

*Sinophorus*  
Family: Ichneumonidae  
BIN URI: BOLD:ABZ8281

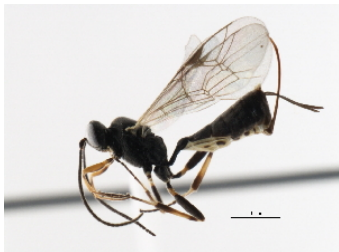

06-PROBE-4425 [Lateral]

*Tranosema rostrale*  
Family: Ichneumonidae  
BIN URI: BOLD:AAD1926

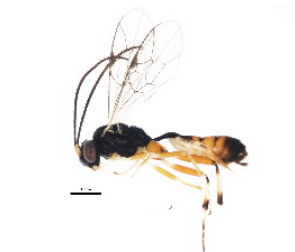

BIOUG00801-H04 [Lateral]

*Phobocampe bicingulata*  
Family: Ichneumonidae  
BIN URI: BOLD:AAM7401

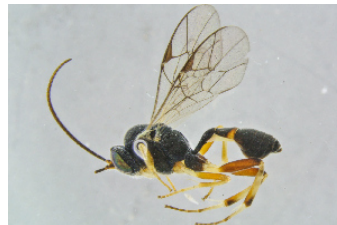

BC-ZSM-HYM-23871-C04 [Lateral]

Ichneumonidae  
Family: Ichneumonidae  
BIN URI: BOLD:AAU8361

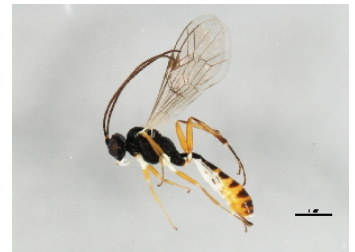

BIOUG00994-A10 [Lateral]

Hymenoptera  
BIN URI: BOLD:AAU8441

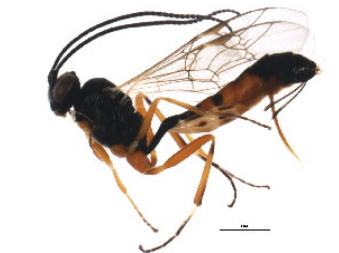

BIOUG00910-F06 [Lateral]

Hymenoptera  
BIN URI: BOLD:AAG8091

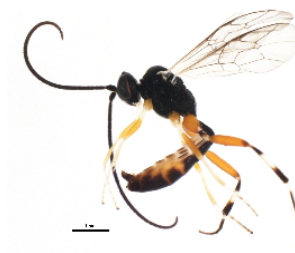

BIOUG01253-C01 [Lateral]

*Campoletis*  
Family: Ichneumonidae  
BIN URI: BOLD:AAU8365

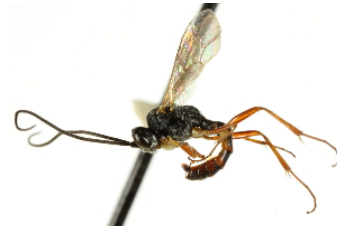

CNCHYM 05306 [Lateral]

*Campoletis flavicincta*  
Family: Ichneumonidae  
BIN URI: BOLD:AAZ8146

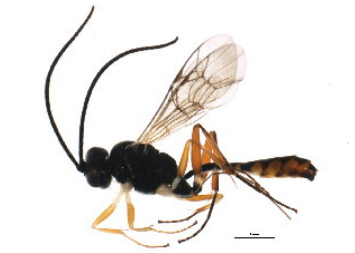

BIOUG00910-F07 [Lateral]

Hymenoptera  
BIN URI: BOLD:ABA6171

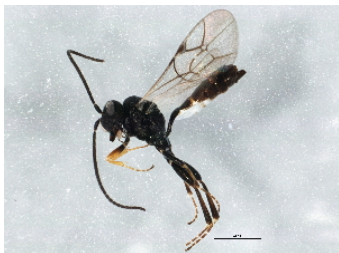

BIOUG05697-D05 [Lateral]

Ichneumonidae  
Family: Ichneumonidae  
BIN URI: BOLD:ABA6269

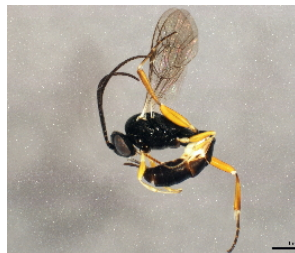

BIOUG03675-H11 [Lateral]

*Campoletis* sp. 17  
Family: Ichneumonidae  
BIN URI: BOLD:AAG5792

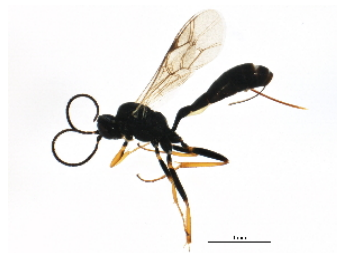

BIOUG22361-E09 [Lateral]

Campopleginae  
Family: Ichneumonidae  
BIN URI: BOLD:ACF9375

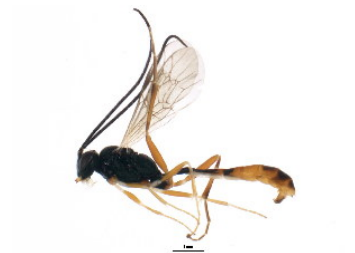

BIOUG00910-D01 [Lateral]

Hymenoptera  
BIN URI: BOLD:ABZ4364

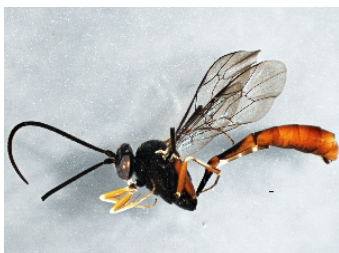

BIOUG05832-D11 [Lateral]

Ichneumonidae  
Family: Ichneumonidae  
BIN URI: BOLD:ACI9776

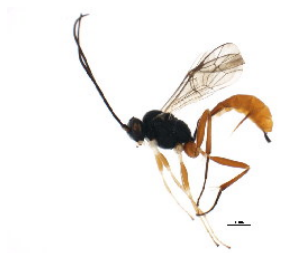

BIOUG00910-D04 [Lateral]

Hymenoptera  
BIN URI: BOLD:AAG5788

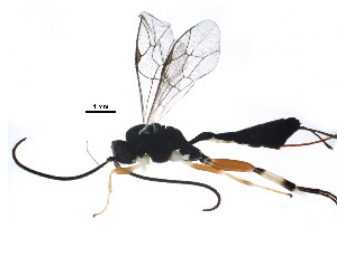

BIOUG22870-D11 [Lateral]

Campopleginae  
Family: Ichneumonidae  
BIN URI: BOLD:ABX9742

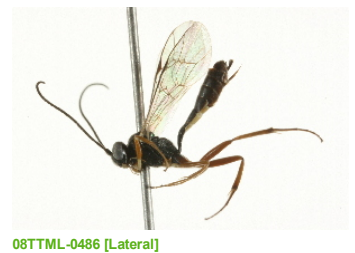

08TTML-0486 [Lateral]

*Enytus apostata*  
Family: Ichneumonidae  
BIN URI: BOLD:AAG5797

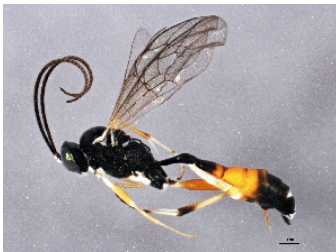

**BIOUG03052-G01 [Lateral]**  
 Campopleginae  
 Family: Ichneumonidae  
 BIN URI: BOLD:ACB1800

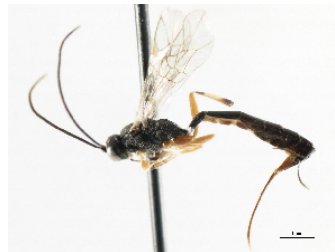

**CNCHYM 07380 [Lateral]**  
 Diadegma pendulum  
 Family: Ichneumonidae  
 BIN URI: BOLD:AAZ9563

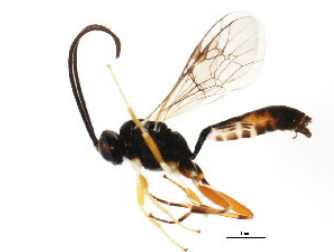

**BIOUG01082-F07 [Lateral]**  
 Campopleginae  
 Family: Ichneumonidae  
 BIN URI: BOLD:AAG8409

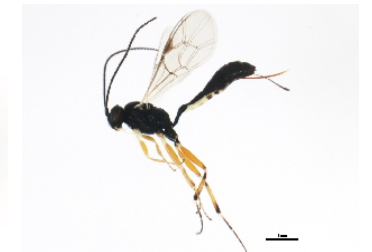

**BIOUG01330-E11 [Lateral]**  
 Diadegma nr. fenestrata  
 Family: Ichneumonidae  
 BIN URI: BOLD:AAG7740

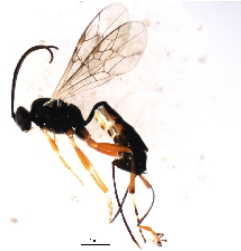

**09BBEHY-2127 [Lateral]**  
 Campopleginae  
 Family: Ichneumonidae  
 BIN URI: BOLD:AAM7514

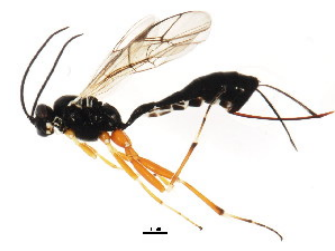

**BIOUG01048-A12 [Lateral]**  
 Campopleginae  
 Family: Ichneumonidae  
 BIN URI: BOLD:ABA6131

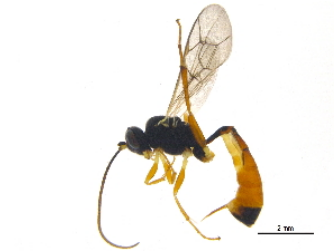

**BIOUG22567-B04 [Lateral]**  
 Campopleginae  
 Family: Ichneumonidae  
 BIN URI: BOLD:ACV5454

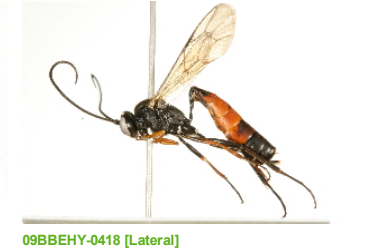

**09BBEHY-0418 [Lateral]**  
 Dusona sp.  
 Family: Ichneumonidae  
 BIN URI: BOLD:AAC9245

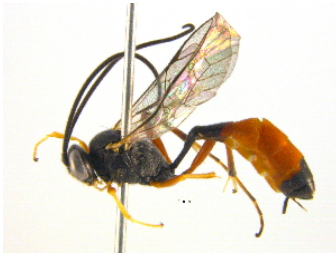

**BIOUG03373-E07 [Lateral]**  
 Dusona minor  
 Family: Ichneumonidae  
 BIN URI: BOLD:AAH1652

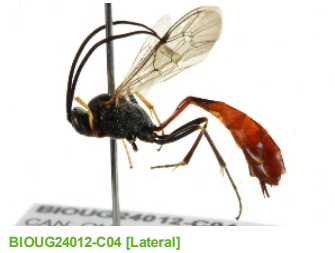

**BIOUG24012-C04 [Lateral]**  
 Dusona  
 Family: Ichneumonidae

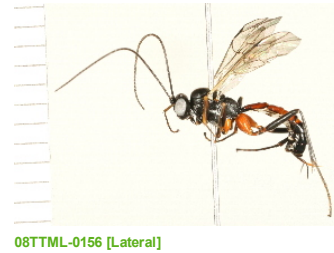

**08TTML-0156 [Lateral]**  
 Banchinae  
 Family: Ichneumonidae  
 BIN URI: BOLD:AAG7666

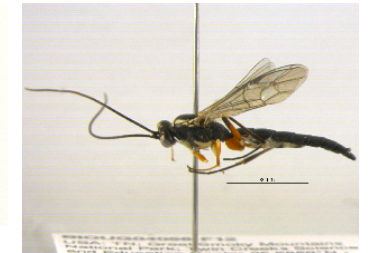

**BIOUG04058-F12 [Lateral]**  
 Lissonota  
 Family: Ichneumonidae  
 BIN URI: BOLD:AAU8646

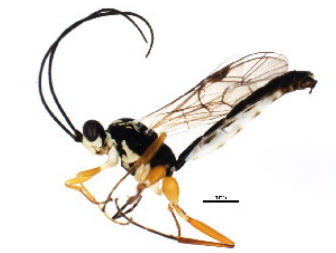

**BIOUG01281-B09 [Lateral]**  
 Lissonota coracina  
 Family: Ichneumonidae  
 BIN URI: BOLD:AAG7794

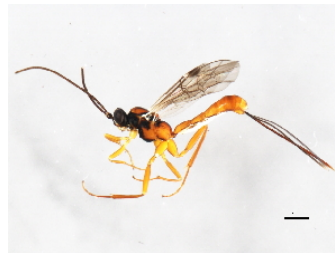

**BIOUG01022-E08 [Lateral]**  
 Banchinae  
 Family: Ichneumonidae  
 BIN URI: BOLD:ACE3609

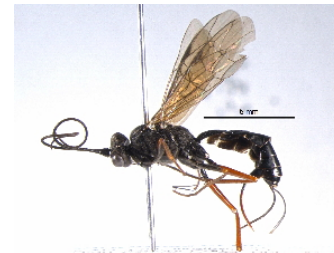

**BIOUG05670-D07 [Lateral]**  
 Banchinae  
 Family: Ichneumonidae  
 BIN URI: BOLD:AAY6799

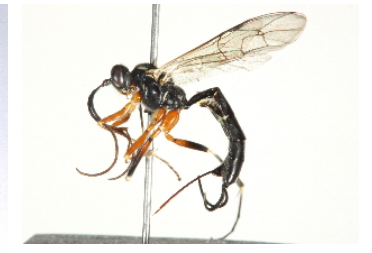

**BIOUG07534-D01 [Lateral]**  
 Banchinae  
 Family: Ichneumonidae  
 BIN URI: BOLD:ACI7472

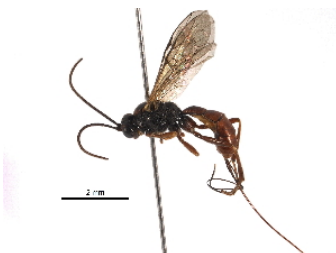

**BIOUG22326-A11 [Lateral]**  
 Banchinae  
 Family: Ichneumonidae  
 BIN URI: BOLD:ACL5173

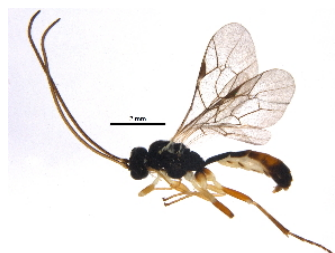

**BIOUG03052-H09 [Lateral]**  
 Ctenopelmatinae  
 Family: Ichneumonidae  
 BIN URI: BOLD:ACP3071

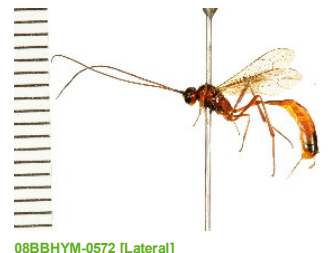

**08BBHYM-0572 [Lateral]**  
 Agrypon flexorium  
 Family: Ichneumonidae  
 BIN URI: BOLD:AAH7052

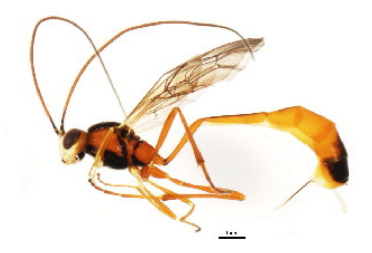

**BIOUG01093-H11 [Lateral]**  
 Agrypon flexorium  
 Family: Ichneumonidae  
 BIN URI: BOLD:ACE7001

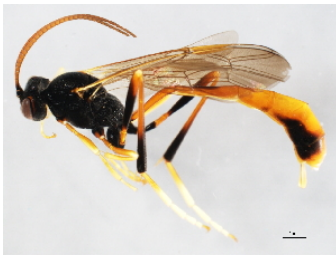

**BIOUG01022-D04 [Lateral]**  
Anomaloniinae  
Family: Ichneumonidae  
BIN URI: BOLD:ABX5713

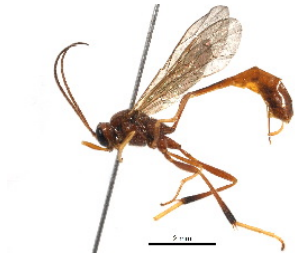

**BIOUG22570-E04 [Lateral]**  
Ichneumonidae  
Family: Ichneumonidae  
BIN URI: BOLD:ACW0948

IMAGE NOT AVAILABLE

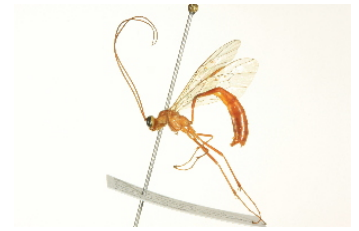

**BIOUG02951-D06 [Lateral]**  
Ophion  
Family: Ichneumonidae  
BIN URI: BOLD:ABA5930

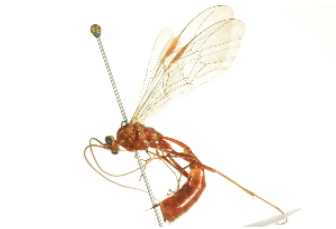

**BIOUG02951-C05 [Lateral]**  
Ophion bilineatus  
Family: Ichneumonidae  
BIN URI: BOLD:AAG8323

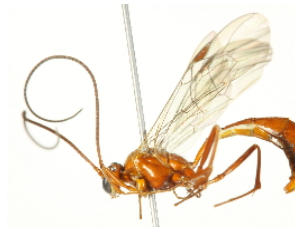

**BIOUG00316-G10 [Lateral]**  
Ophion clava  
Family: Ichneumonidae  
BIN URI: BOLD:AAG7774

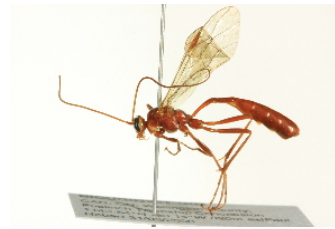

**BIOUG02951-G02 [Lateral]**  
Ophion idoneus  
Family: Ichneumonidae  
BIN URI: BOLD:AAN8172

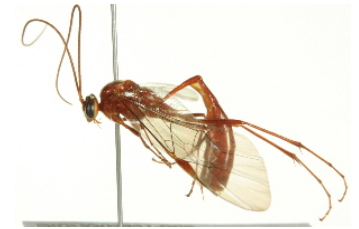

**BIOUG02951-B09 [Lateral]**  
Ophion sp. 5 MDS2014  
Family: Ichneumonidae  
BIN URI: BOLD:AAI3361

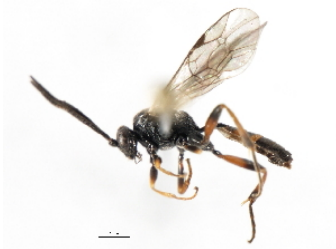

**07PROBE-23738 [Lateral]**  
Cryptinae  
Family: Ichneumonidae  
BIN URI: BOLD:AAE2457

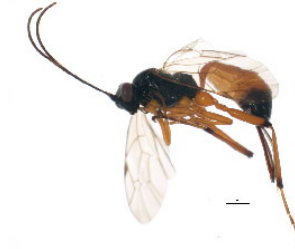

**BIOUG00910-C06 [Lateral]**  
Hymenoptera  
BIN URI: BOLD:AAG8275

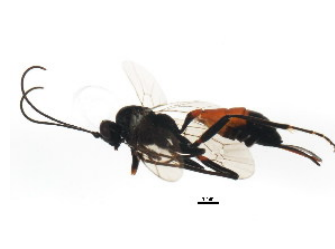

**BIOUG01030-D11 [Lateral]**  
Cryptinae  
Family: Ichneumonidae  
BIN URI: BOLD:ACN0503

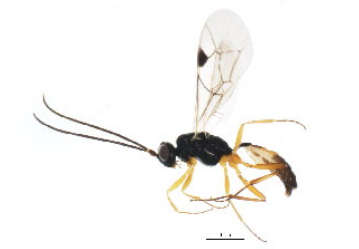

**BIOUG01034-H06 [Lateral]**  
Cryptinae  
Family: Ichneumonidae  
BIN URI: BOLD:AAU8485

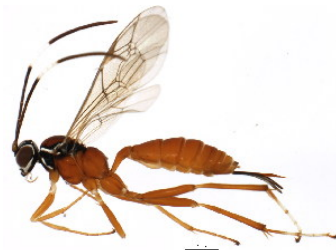

**BIOUG00910-G09 [Lateral]**  
Hymenoptera  
BIN URI: BOLD:AAG7737

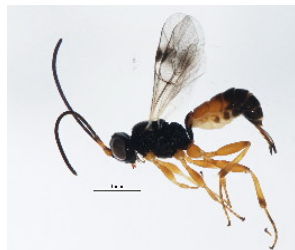

**BIOUG00823-D08 [Lateral]**  
Cryptinae  
Family: Ichneumonidae  
BIN URI: BOLD:AAW0431

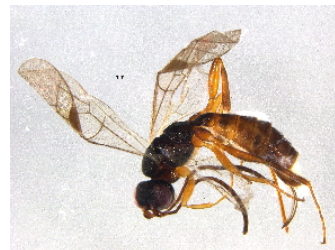

**BIOUG04311-B09 [Lateral]**  
Cryptinae  
Family: Ichneumonidae  
BIN URI: BOLD:ACD1672

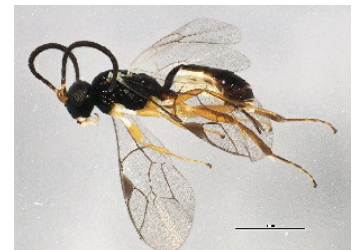

**ASGLE-0528 [Lateral]**  
Hymenoptera  
BIN URI: BOLD:AAU8490

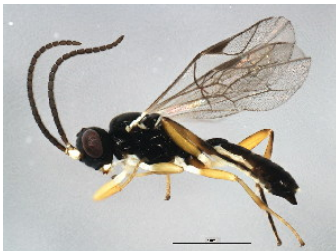

**ASGLE-0540 [Lateral]**  
Hymenoptera  
BIN URI: BOLD:ACF3297

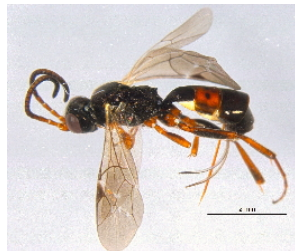

**BIOUG05537-A02 [Lateral]**  
Cryptinae  
Family: Ichneumonidae  
BIN URI: BOLD:AAH1692

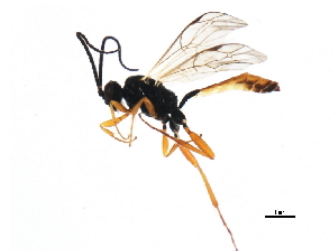

**BIOUG01022-E12 [Lateral]**  
Cryptinae  
Family: Ichneumonidae  
BIN URI: BOLD:ABX5561

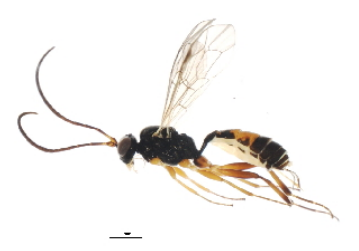

**10BBCHY-2601 [Lateral]**  
Cryptinae  
Family: Ichneumonidae  
BIN URI: BOLD:AAF1382

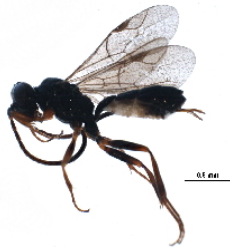

**BIOUG21885-H07 [Lateral]**  
Ichneumonidae  
Family: Ichneumonidae  
BIN URI: BOLD:ACV3635

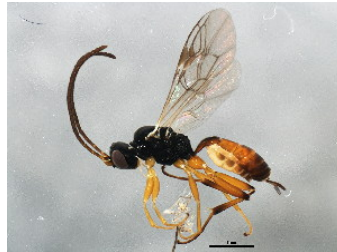

**ASGLE-0939 [Lateral]**  
Hymenoptera  
BIN URI: BOLD:AAG7744

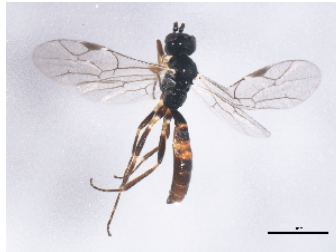

**BIOUG01018-A06 [Dorsal]**  
Cryptinae  
Family: Ichneumonidae  
BIN URI: BOLD:ABA5934

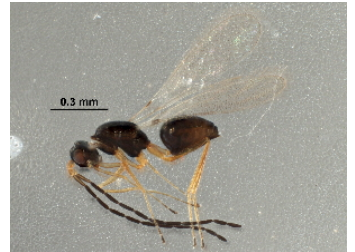

**BIOUG06689-H09 [Lateral]**  
Gelis  
Family: Ichneumonidae  
BIN URI: BOLD:ACJ5069

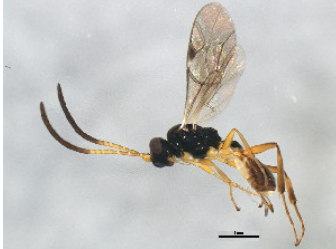

**ASGLE-0913 [Lateral]**  
Hymenoptera  
BIN URI: BOLD:AAG9197

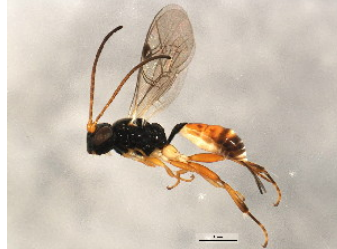

**ASGLE-0860 [Lateral]**  
Hymenoptera  
BIN URI: BOLD:AAU8687

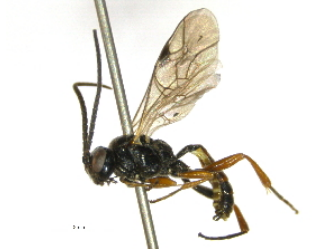

**BIOUG03281-H07 [Lateral]**  
Cryptinae  
Family: Ichneumonidae  
BIN URI: BOLD:ACB3569

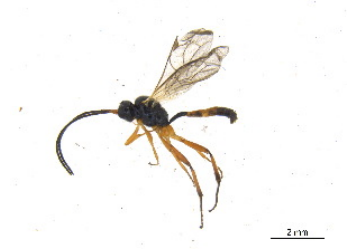

**BIOUG06753-D05 [Lateral]**  
Hymenoptera  
BIN URI: BOLD:AAU8389

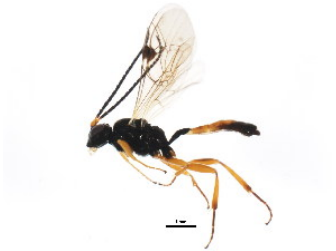

**BIOUG01036-C05 [Lateral]**  
Cryptinae  
Family: Ichneumonidae  
BIN URI: BOLD:ABA5909

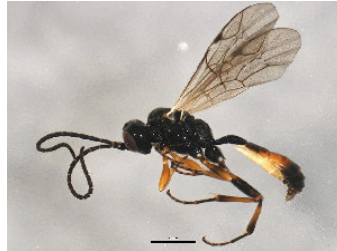

**ASGLE-1123 [Lateral]**  
Hymenoptera  
BIN URI: BOLD:AAE9438

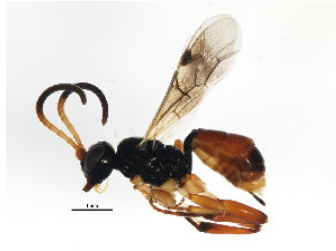

**BIOUG00846-E08 [Lateral]**  
Cryptinae  
Family: Ichneumonidae  
BIN URI: BOLD:AAG7638

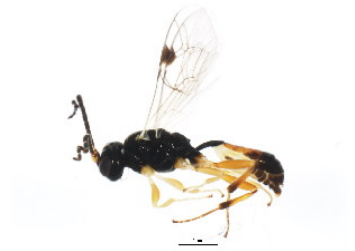

**BIOUG01032-F11 [Lateral]**  
Cryptinae  
Family: Ichneumonidae  
BIN URI: BOLD:AAU8327

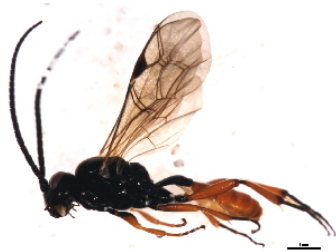

**09PROBE-A0015 [Lateral]**  
Cryptinae  
Family: Ichneumonidae  
BIN URI: BOLD:AAN7591

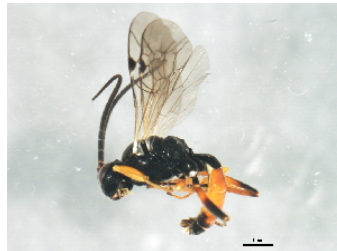

**BIOUG01033-B04 [Lateral]**  
Cryptinae  
Family: Ichneumonidae  
BIN URI: BOLD:ACF2067

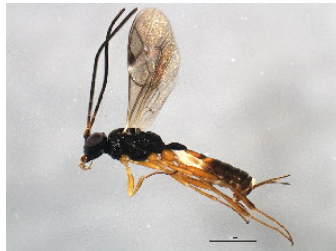

**ASGLE-0495 [Lateral]**  
Hymenoptera  
BIN URI: BOLD:AAU8483

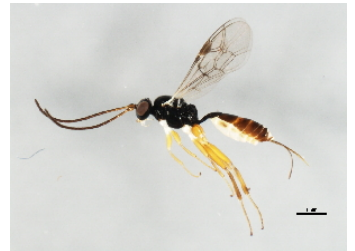

**BIOUG00994-A09 [Lateral]**  
Hymenoptera  
BIN URI: BOLD:AAM9117

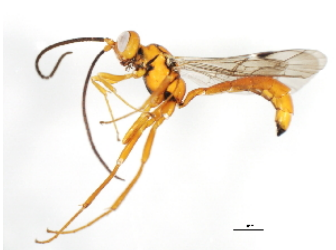

**09BBHYM-644 [Lateral]**  
Ichneumonidae  
Family: Ichneumonidae  
BIN URI: BOLD:AAG8236

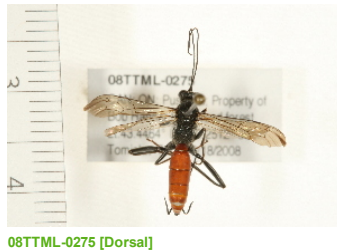

**08TTML-0275 [Dorsal]**  
*Cryptus albitarsis*  
Family: Ichneumonidae  
BIN URI: BOLD:AAH1693

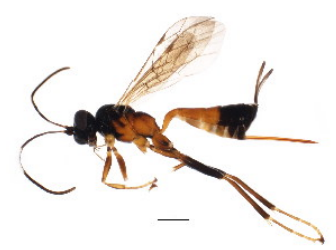

**BIOUG01631-B02 [Lateral]**  
Cryptinae  
Family: Ichneumonidae  
BIN URI: BOLD:AAH1793

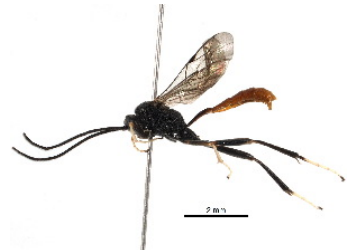

**BIOUG22570-F02 [Lateral]**  
Trychosis  
Family: Ichneumonidae  
BIN URI: BOLD:ACW1110

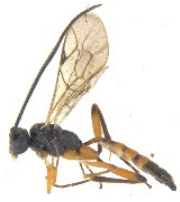

**BIOUG06753-F09 [Lateral]**  
Hymenoptera

BIN URI: BOLD:AAG7687

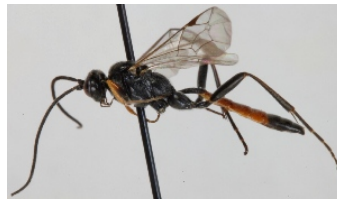

**FICH-001207 [Lateral]**  
*Agrothereutes mansuetor*  
Family: Ichneumonidae  
BIN URI: BOLD:AAG7768

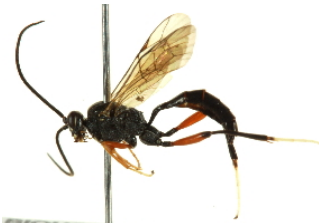

**BIOUG24008-D12 [Lateral]**  
Ichneumonidae  
Family: Ichneumonidae

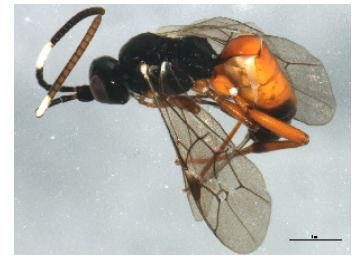

**BIOUG01483-B07 [Lateral]**  
*Oresbius taeniatus*  
Family: Ichneumonidae  
BIN URI: BOLD:AAH1683

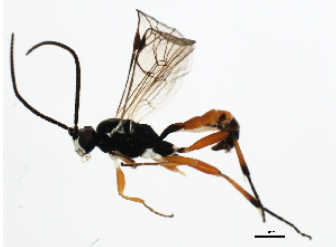

**10PHMAL-0318 [Lateral]**  
*Oresbius*  
Family: Ichneumonidae  
BIN URI: BOLD:ACE9715

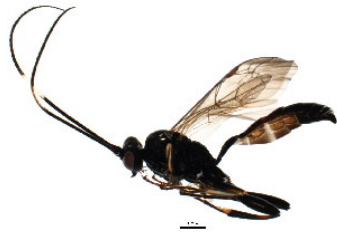

**BIOUG01283-F08 [Lateral]**  
*Asthenolabus*  
Family: Ichneumonidae  
BIN URI: BOLD:AAU8294

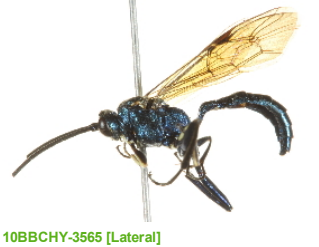

**10BBCHY-3565 [Lateral]**  
Ichneumoninae  
Family: Ichneumonidae  
BIN URI: BOLD:AAU8895

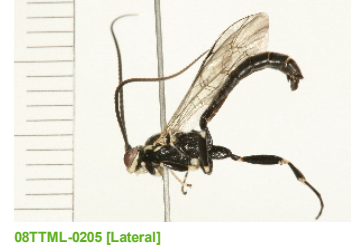

**08TTML-0205 [Lateral]**  
Ichneumoninae  
Family: Ichneumonidae  
BIN URI: BOLD:AAG7676

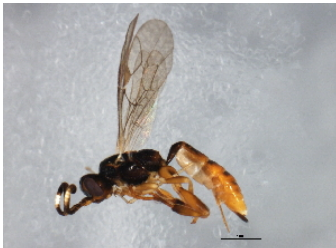

**09BBEHY-1940 [Lateral]**  
Ichneumoninae  
Family: Ichneumonidae  
BIN URI: BOLD:AAH2179

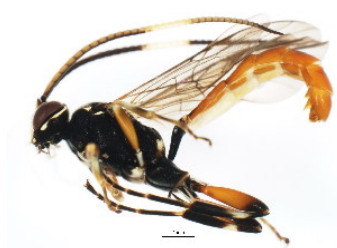

**BIOUG01032-B10 [Lateral]**  
Ichneumoninae  
Family: Ichneumonidae  
BIN URI: BOLD:AAU8223

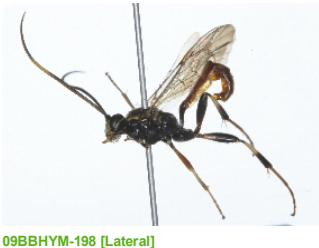

**09BBHYM-198 [Lateral]**  
Ichneumoninae  
Family: Ichneumonidae  
BIN URI: BOLD:ACE8616

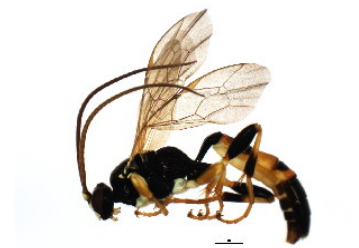

**BIOUG01044-G10 [Lateral]**  
Ichneumoninae  
Family: Ichneumonidae  
BIN URI: BOLD:AAH7588

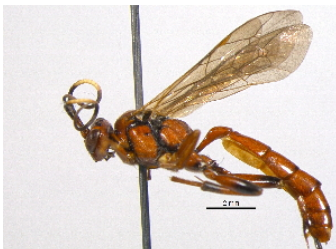

**BIOUG05513-A02 [Lateral]**  
Ichneumoninae  
Family: Ichneumonidae  
BIN URI: BOLD:AAU8706

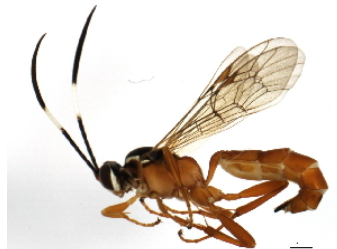

**ASGLE-0678 [Lateral]**  
Hymenoptera  
BIN URI: BOLD:AAG7679

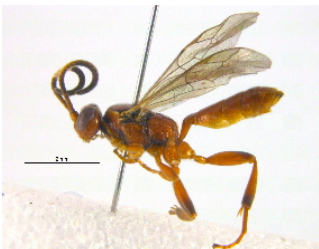

**BIOUG03373-H05 [Lateral]**  
Ichneumoninae  
Family: Ichneumonidae  
BIN URI: BOLD:AAG8176

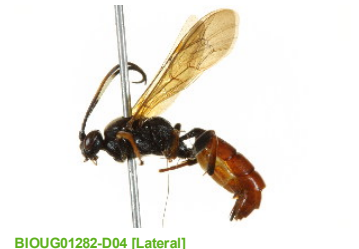

**BIOUG01282-D04 [Lateral]**  
*Ichneumon*  
Family: Ichneumonidae  
BIN URI: BOLD:ACE4814

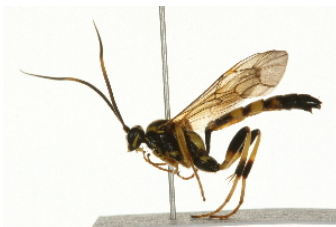

**09BBEHY-0019 [Lateral]**  
*Ichneumon computatorius*  
Family: Ichneumonidae  
BIN URI: BOLD:ACE3185

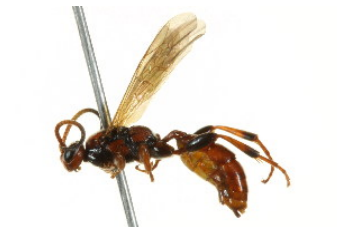

**BIOUG01282-F10 [Lateral]**  
*Ichneumon discoensis*  
Family: Ichneumonidae  
BIN URI: BOLD:ACE9045

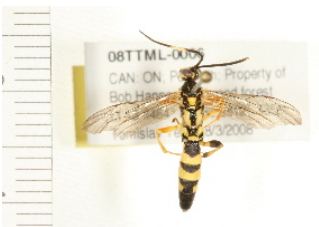

**08TTML-0006 [Dorsal]**  
Ichneumoninae  
Family: Ichneumonidae  
BIN URI: BOLD:ACF0076

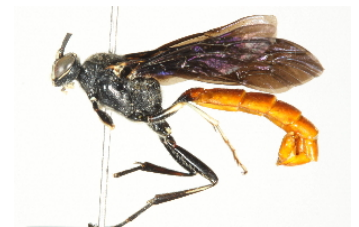

**BIOUG07534-B06 [Lateral]**  
Ichneumoninae  
Family: Ichneumonidae  
BIN URI: BOLD:ACI9173

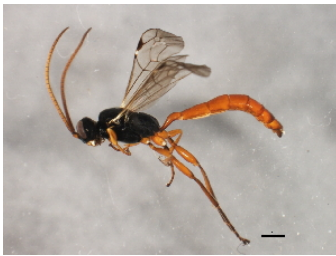

**BIOUG00988-H03 [Lateral]**  
Hymenoptera  
BIN URI: BOLD:AAG7641

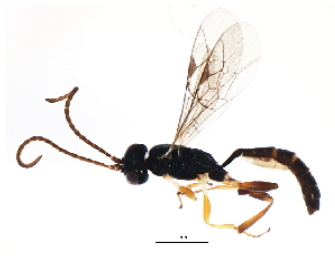

**BIOUG00845-B03 [Lateral]**  
Ichneumoninae  
Family: Ichneumonidae  
BIN URI: BOLD:AAH2004

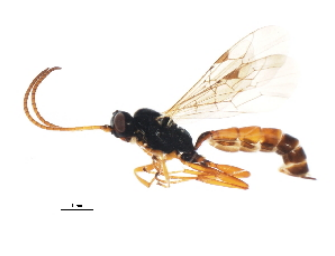

**10BBCHY-3075 [Lateral]**  
Ichneumoninae  
Family: Ichneumonidae  
BIN URI: BOLD:AAG7732

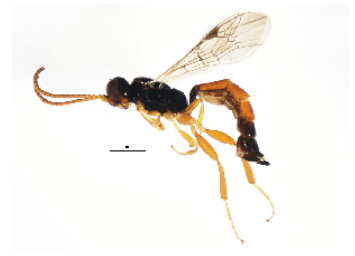

**ASGLE2-0169 [Lateral]**  
Hymenoptera  
BIN URI: BOLD:AAG7745

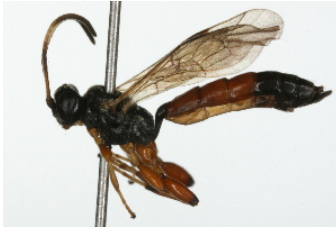

**08TTML-0422 [Lateral]**  
Ichneumoninae  
Family: Ichneumonidae  
BIN URI: BOLD:ABZ7151

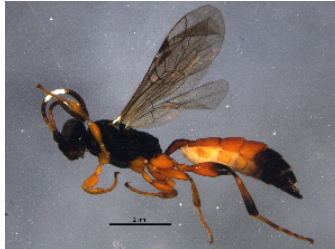

**BIOUG07536-D07 [Lateral]**  
Ichneumoninae  
Family: Ichneumonidae  
BIN URI: BOLD:ACJ1122

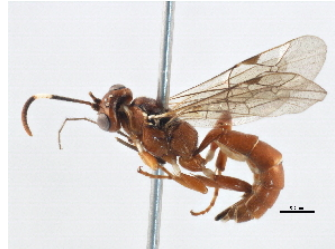

**BIOUG09053-H10 [Lateral]**  
Ichneumoninae  
Family: Ichneumonidae  
BIN URI: BOLD:ACL1096

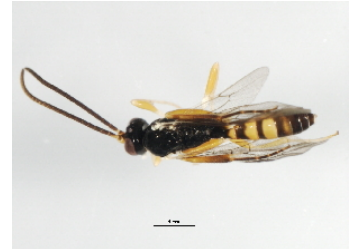

**09BBEHY-0273 [Dorsal]**  
Cryptinae  
Family: Ichneumonidae  
BIN URI: BOLD:AAG9169

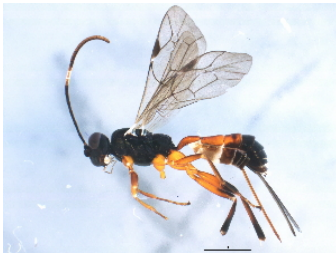

**BIOUG04528-G11 [Lateral]**  
Cryptinae  
Family: Ichneumonidae  
BIN URI: BOLD:ACF3930

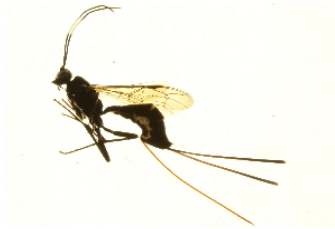

**ASGLE2-0300 [Lateral]**  
Hymenoptera  
BIN URI: BOLD:AAH1886

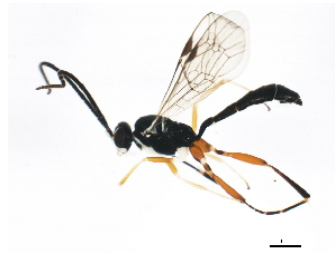

**BIOUG01033-B08 [Lateral]**  
Cryptinae  
Family: Ichneumonidae  
BIN URI: BOLD:ABA5989

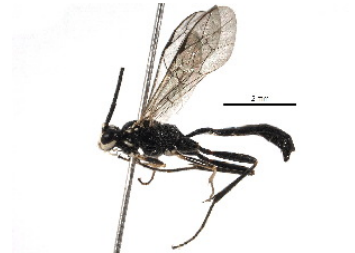

**BIOUG22570-G02 [Lateral]**  
Ichneumonidae  
Family: Ichneumonidae  
BIN URI: BOLD:ACW1092

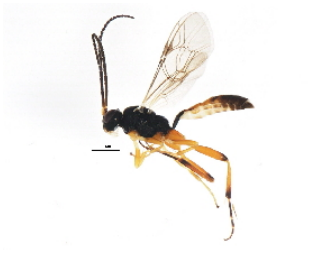

**ASGLE2-0417 [Lateral]**  
Hymenoptera  
BIN URI: BOLD:AAG7710

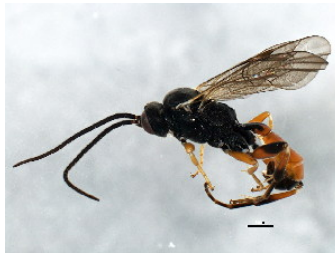

**ASGLE-0986 [Lateral]**  
Hymenoptera  
BIN URI: BOLD:AAU8228

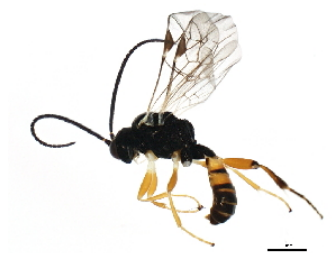

**10PHMAL-0669 [Lateral]**  
Cryptinae  
Family: Ichneumonidae  
BIN URI: BOLD:AAQ2692

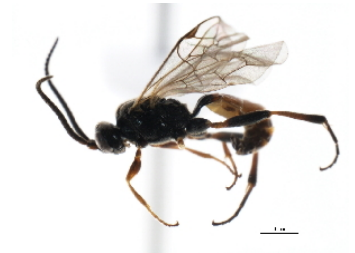

**CNCH0048 [Lateral]**  
Cryptinae  
Family: Ichneumonidae  
BIN URI: BOLD:ABY7035

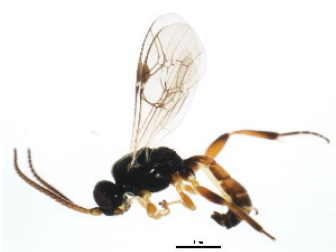

**BIOUG01030-D02 [Lateral]**  
Cryptinae  
Family: Ichneumonidae  
BIN URI: BOLD:ABA7969

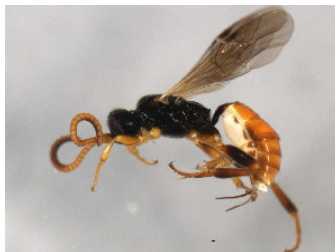

**ASGLE-0054 [Lateral]**  
Hymenoptera  
BIN URI: BOLD:ACE5353

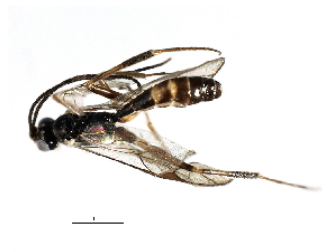

**07PROBE-24343 [Lateral]**  
Orthocentrinae  
Family: Ichneumonidae  
BIN URI: BOLD:AAG0964

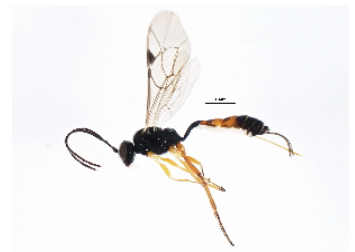

**ASGLE-0475 [Lateral]**  
Hymenoptera  
BIN URI: BOLD:AAU8495



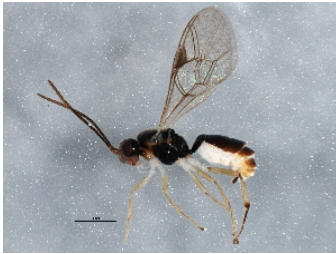

**BIOUG03621-C07 [Lateral]**  
Adelognathus  
Family: Ichneumonidae  
BIN URI: BOLD:AAy6793

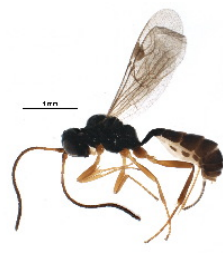

**BIOUG22421-D01 [Lateral]**  
Ichneumonidae  
Family: Ichneumonidae  
BIN URI: BOLD:ACL8125

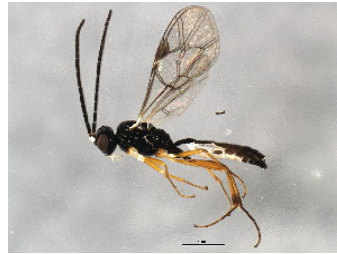

**ASGLE-0506 [Lateral]**  
Hymenoptera  
BIN URI: BOLD:AAU8487

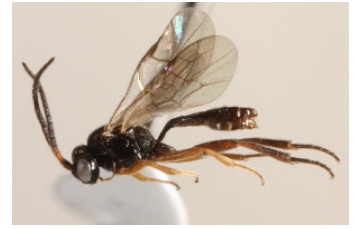

**CNCHYM 08512 [Lateral]**  
Dialipsis dissimilis  
Family: Ichneumonidae  
BIN URI: BOLD:ABA6048

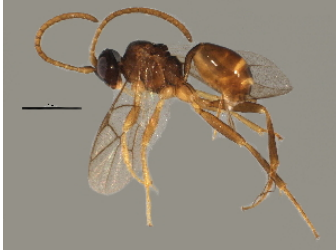

**BIOUG07032-F06 [Lateral]**  
Ichneumonidae  
Family: Ichneumonidae  
BIN URI: BOLD:ACI6350

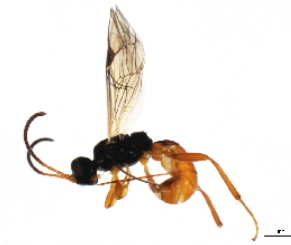

**10PHMAL-0617 [Lateral]**  
Cryptinae  
Family: Ichneumonidae  
BIN URI: BOLD:AAU8372

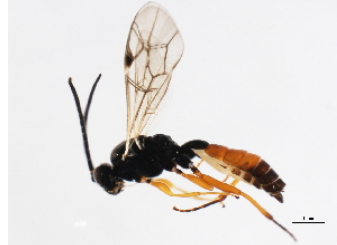

**BIOUG01028-C02 [Lateral]**  
Cryptinae  
Family: Ichneumonidae  
BIN URI: BOLD:ABA7959

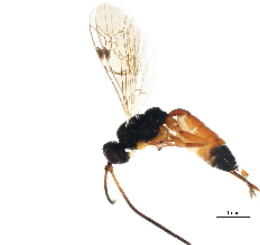

**BIOUG01291-D02 [Lateral]**  
Cryptinae  
Family: Ichneumonidae  
BIN URI: BOLD:ABA8048

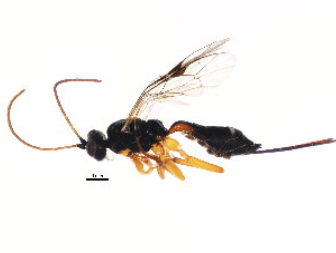

**BIOUG00861-B01 [Lateral]**  
Echthrus sp.  
Family: Ichneumonidae  
BIN URI: BOLD:AAG9189

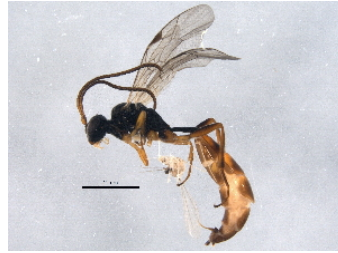

**BIOUG05443-G11 [Lateral]**  
Mesoleptus congener  
Family: Ichneumonidae  
BIN URI: BOLD:ACE6694

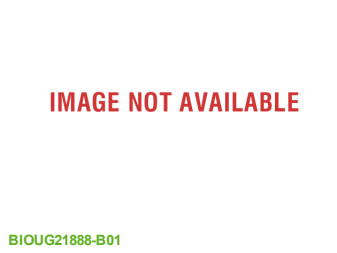

**BIOUG21888-B01**  
Ichneumonidae  
Family: Ichneumonidae

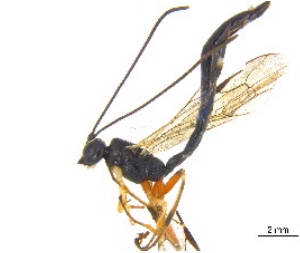

**BIOUG06752-E05 [Lateral]**  
Hymenoptera  
BIN URI: BOLD:AAU8384

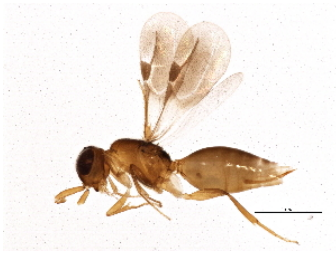

**BIOUG05742-H01 [Lateral]**  
Megaspilidae  
Family: Megaspilidae  
BIN URI: BOLD:ACF8460

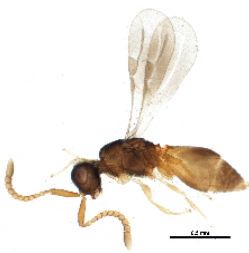

**BIOUG09249-D11 [Lateral]**  
Megaspilidae  
Family: Megaspilidae  
BIN URI: BOLD:ACK9712

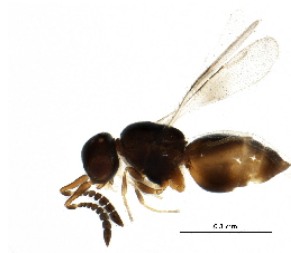

**BIOUG22363-B08 [Lateral]**  
Megaspilidae  
Family: Megaspilidae  
BIN URI: BOLD:ACV3846

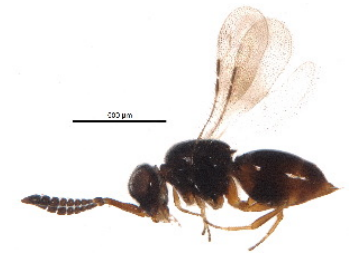

**BIOUG23085-B08 [Lateral]**  
Megaspilidae  
Family: Megaspilidae  
BIN URI: BOLD:ACW1215

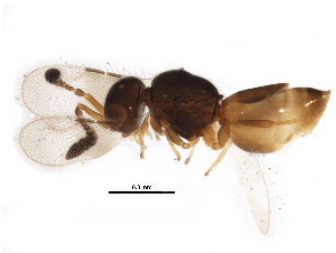

**BIOUG22420-C04 [Lateral]**  
Megaspilidae  
Family: Megaspilidae  
BIN URI: BOLD:ACV2997

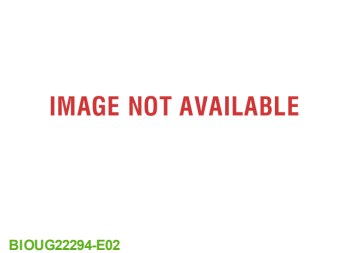

**BIOUG22294-E02**  
Megaspilidae  
Family: Megaspilidae

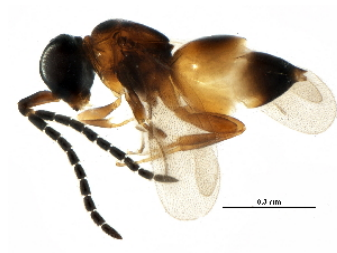

**BIOUG22727-D10 [Lateral]**  
Megaspilidae  
Family: Megaspilidae  
BIN URI: BOLD:ACJ7345

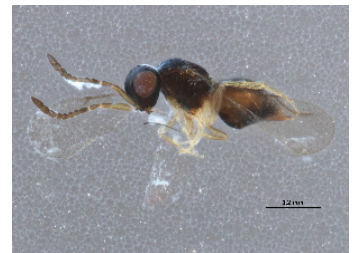

**BIOUG11332-A01 [Lateral]**  
Megaspilidae  
Family: Megaspilidae  
BIN URI: BOLD:ACM6824

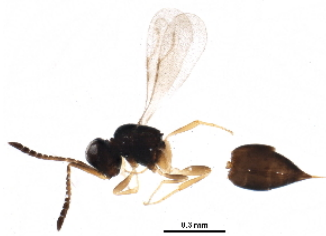

**BIOUG22626-B02 [Lateral]**  
Megaspilidae  
Family: Megaspilidae  
BIN URI: BOLD:ACV5959

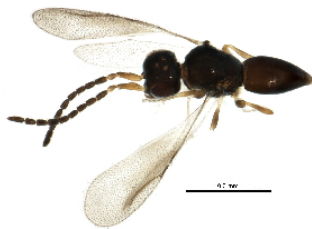

**BIOUG22626-C06 [Lateral]**  
Megaspilidae  
Family: Megaspilidae  
BIN URI: BOLD:ACB7855

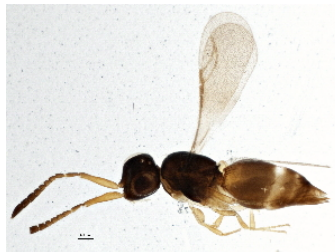

**BIOUG04766-A07 [Lateral]**  
Hymenoptera  
BIN URI: BOLD:AAU8999

IMAGE NOT AVAILABLE

**BIOUG22727-A03**  
Megaspilidae  
Family: Megaspilidae

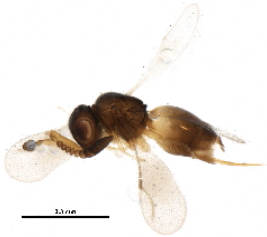

**BIOUG21288-G01 [Lateral]**  
Hymenoptera  
BIN URI: BOLD:ACV0821

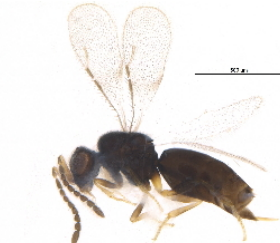

**BIOUG16339-E03 [Lateral]**  
Hymenoptera  
BIN URI: BOLD:ACQ9215

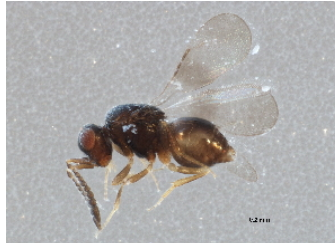

**BIOUG10451-E07 [Lateral]**  
Megaspilidae  
Family: Megaspilidae  
BIN URI: BOLD:ACL6182

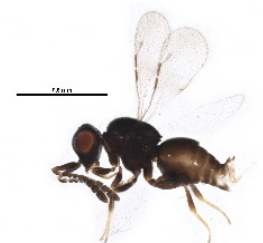

**BIOUG22723-D07 [Lateral]**  
Megaspilidae  
Family: Megaspilidae  
BIN URI: BOLD:ACV5554

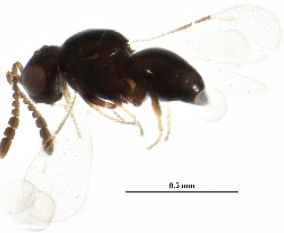

**BIOUG23074-E01 [Lateral]**  
Megaspilidae  
Family: Megaspilidae  
BIN URI: BOLD:ACV5863

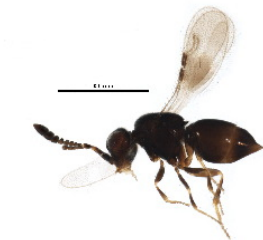

**BIOUG22453-A04 [Lateral]**  
Megaspilidae  
Family: Megaspilidae  
BIN URI: BOLD:ACJ1417

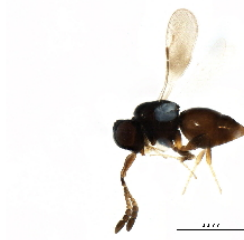

**BIOUG22727-F09 [Lateral]**  
Megaspilidae  
Family: Megaspilidae  
BIN URI: BOLD:ACK1895

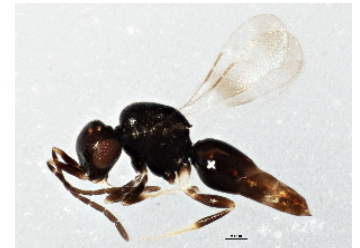

**BIOUG03697-G06 [Lateral]**  
Megaspilidae  
Family: Megaspilidae  
BIN URI: BOLD:ACB0899

IMAGE NOT AVAILABLE

**BIOUG23074-B05**  
Megaspilidae  
Family: Megaspilidae

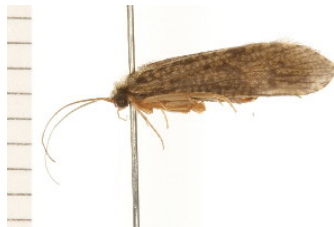

**08NBEPT-0788 [Lateral]**  
Plectrocnemia cinerea  
Family: Polycentropodidae

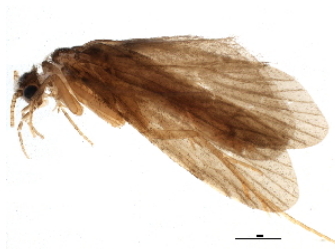

**BIOUG10205-C02 [Lateral]**  
Plectrocnemia cinerea  
Family: Polycentropodidae  
BIN URI: BOLD:ACL7631

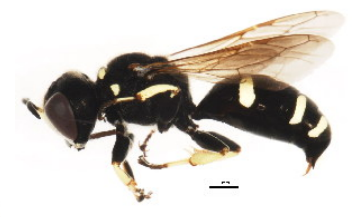

**BIOUG1082-H01 [Lateral]**  
Ectemnius continuus  
Family: Crabronidae  
BIN URI: BOLD:AAE8158

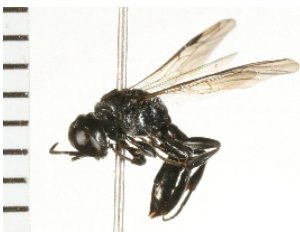

**08BBHYM-0600 [Lateral]**  
Crossocerus barbipes  
Family: Crabronidae  
BIN URI: BOLD:AAG3190

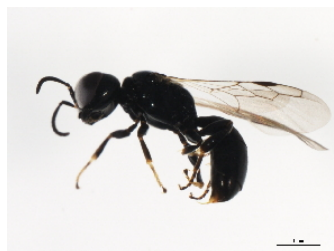

**09BBEHY-0690 [Lateral]**  
Crossocerus  
Family: Crabronidae  
BIN URI: BOLD:AAG3203

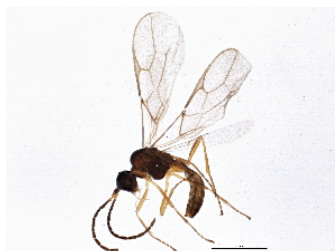

**BIOUG06195-E03 [Lateral]**  
Ephedrus lacertosus  
Family: Braconidae  
BIN URI: BOLD:ACW2698

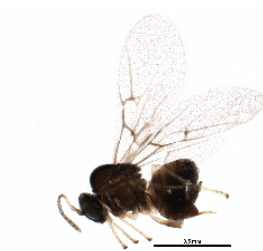

**BIOUG22458-E04 [Lateral]**  
Cynipidae  
Family: Cynipidae  
BIN URI: BOLD:ACF8609

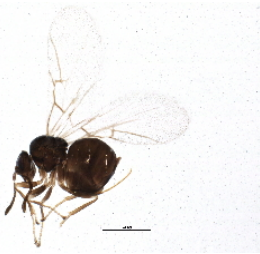

**BIOUG13058-C08 [Lateral]**  
Cynipidae  
Family: Cynipidae  
BIN URI: BOLD:ACF8754

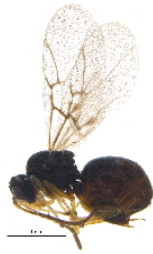

**BIOUG16755-G08 [Lateral]**  
Cynipidae  
Family: Cynipidae  
BIN URI: BOLD:ACF8991

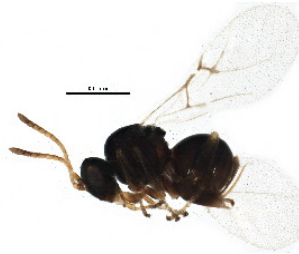

**BIOUG22464-G02 [Lateral]**  
Cynipidae  
Family: Cynipidae  
BIN URI: BOLD:ACV4572

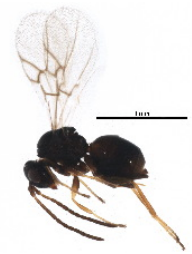

**BIOUG22420-C05 [Lateral]**  
Cynipidae  
Family: Cynipidae  
BIN URI: BOLD:ACJ0844

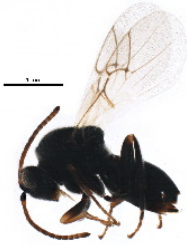

**BIOUG22420-G06 [Lateral]**  
Figitidae  
Family: Figitidae  
BIN URI: BOLD:ACV2330

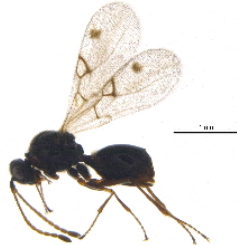

**BIOUG21615-E08 [Lateral]**  
Figitinae  
Family: Figitidae  
BIN URI: BOLD:AAU9795

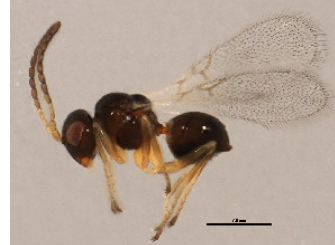

**ASGLE-0338 [Lateral]**  
Charipinae  
Family: Figitidae  
BIN URI: BOLD:AAU8573

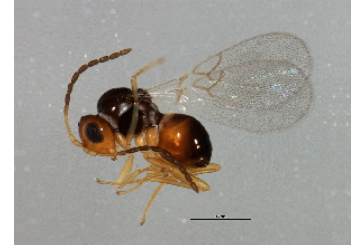

**MTHYM-0002 [Lateral]**  
Charipinae  
Family: Figitidae  
BIN URI: BOLD:ACT6224

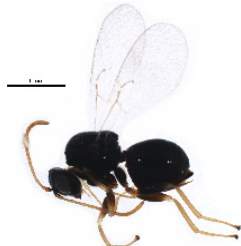

**BIOUG22626-B10 [Lateral]**  
Figitidae  
Family: Figitidae  
BIN URI: BOLD:ACV5063

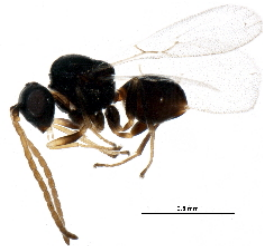

**BIOUG21892-B06 [Lateral]**  
Figitidae  
Family: Figitidae  
BIN URI: BOLD:ACV5064

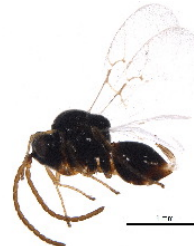

**BIOUG21888-A08 [Lateral]**  
Figitidae  
Family: Figitidae  
BIN URI: BOLD:ACV5106

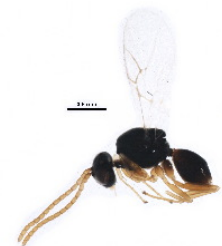

**BIOUG21892-B05 [Lateral]**  
Figitidae  
Family: Figitidae  
BIN URI: BOLD:AA8196

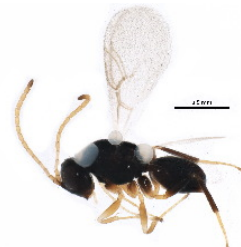

**BIOUG22724-B01 [Lateral]**  
Figitidae  
Family: Figitidae  
BIN URI: BOLD:ACV5721

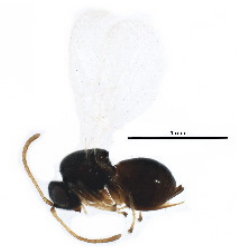

**BIOUG22453-G07 [Lateral]**  
Figitidae  
Family: Figitidae  
BIN URI: BOLD:ABA9839

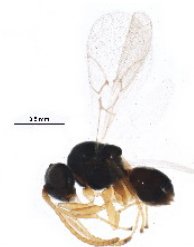

**BIOUG22626-A06 [Lateral]**  
Figitidae  
Family: Figitidae  
BIN URI: BOLD:ACV5785

**IMAGE NOT AVAILABLE**

**BIOUG24011-E05**  
Figitidae  
Family: Figitidae

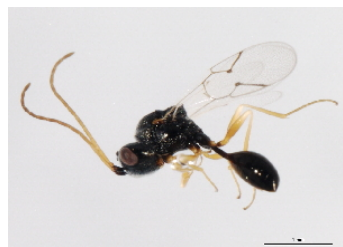

**09BBHYM-707 [Lateral]**  
Anacharis  
Family: Figitidae  
BIN URI: BOLD:AAG8258

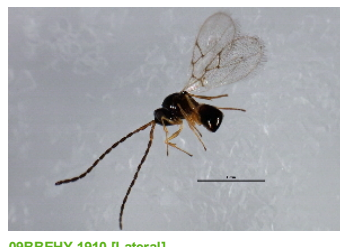

**09BBEHY-1910 [Lateral]**  
Eucoilinae  
Family: Figitidae  
BIN URI: BOLD:AAM7478

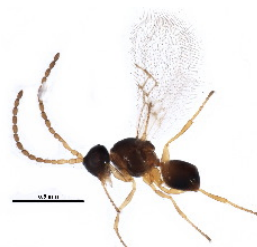

**BIOUG22723-G02 [Lateral]**  
Figitidae  
Family: Figitidae  
BIN URI: BOLD:ACJ1628

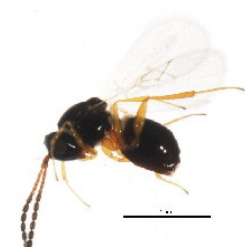

**BIOUG01037-B08 [Lateral]**  
Eucoilinae  
Family: Figitidae  
BIN URI: BOLD:ABA7998

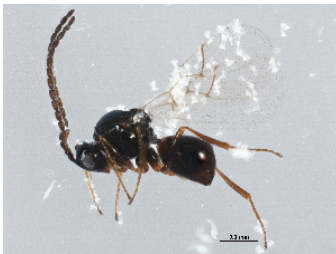

**BIOUG11158-F03 [Lateral]**  
Eucollinae  
Family: Figitidae  
BIN URI: BOLD:ACM0003

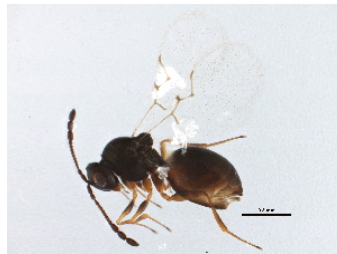

**BIOUG08154-H07 [Lateral]**  
Ganaspis  
Family: Figitidae  
BIN URI: BOLD:ACD4392

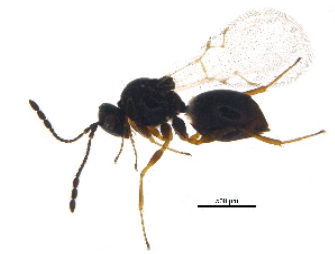

**BIOUG22927-A05 [Lateral]**  
Figitidae  
Family: Figitidae  
BIN URI: BOLD:ACN5042

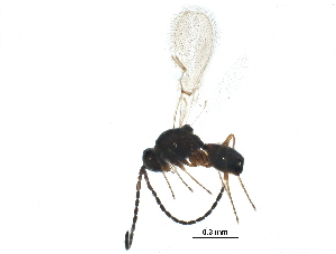

**BIOUG13672-D04 [Lateral]**  
Hymenoptera  
BIN URI: BOLD:ACO6056

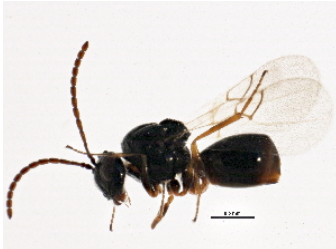

**BIOUG05529-G09 [Lateral]**  
Eucollinae  
Family: Figitidae  
BIN URI: BOLD:ABA5948

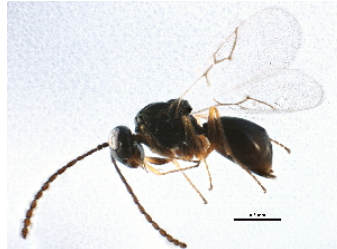

**BIOUG11907-D05 [Lateral]**  
Hymenoptera  
BIN URI: BOLD:ACM9237

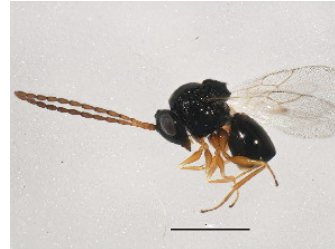

**ASGLE-1124 [Lateral]**  
Eucollinae  
Family: Figitidae  
BIN URI: BOLD:AAU8625

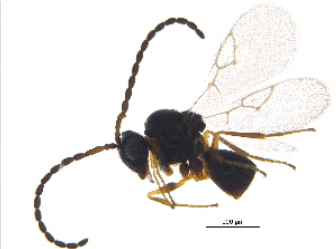

**BIOUG22578-A11 [Lateral]**  
Figitidae  
Family: Figitidae  
BIN URI: BOLD:ACV4105

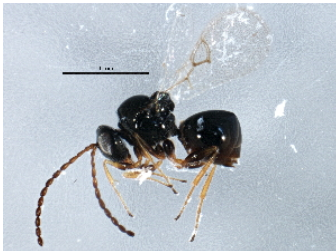

**BIOUG03220-B12 [Lateral]**  
Eucollinae  
Family: Figitidae  
BIN URI: BOLD:ACG3398

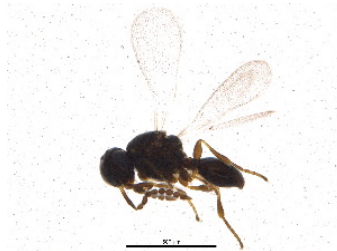

**BIOUG12227-A11 [Lateral]**  
Hymenoptera  
BIN URI: BOLD:ACI8542

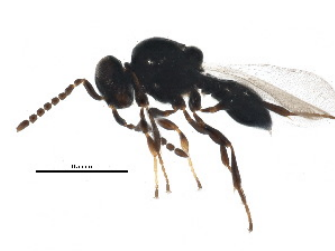

**BIOUG22453-B12 [Lateral]**  
Platygasteridae  
Family: Platygasteridae  
BIN URI: BOLD:ACV2105

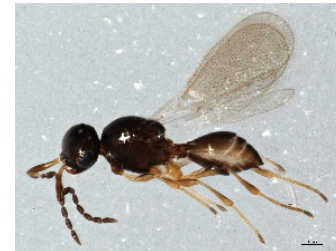

**BIOUG06213-B12 [Lateral]**  
Platygasteridae  
Family: Platygasteridae  
BIN URI: BOLD:ACI3903

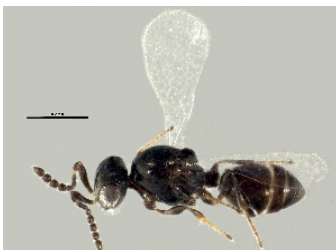

**BIOUG07941-D09 [Lateral]**  
Platygasteridae  
Family: Platygasteridae  
BIN URI: BOLD:ACJ0034

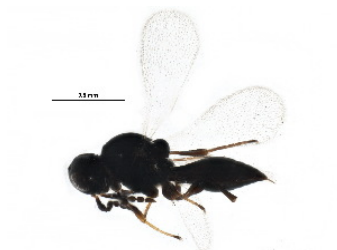

**BIOUG22421-C07 [Lateral]**  
Platygasteridae  
Family: Platygasteridae  
BIN URI: BOLD:ABX8472

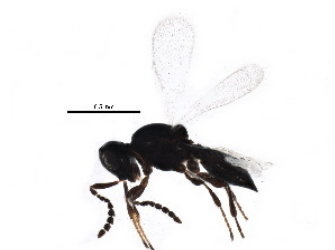

**BIOUG22724-A06 [Lateral]**  
Platygasteridae  
Family: Platygasteridae  
BIN URI: BOLD:ACV5289

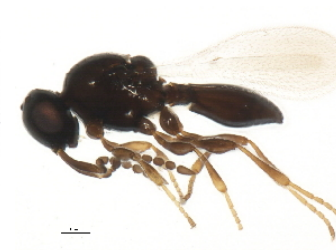

**BIOUG01501-G04 [Lateral]**  
Platygaster variabilis  
Family: Platygasteridae  
BIN URI: BOLD:ABW3242

**IMAGE NOT AVAILABLE**

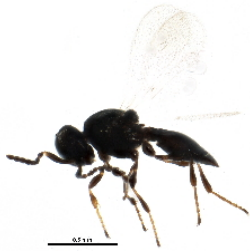

BIOUG22464-F01  
Platygastridae  
Family: Platygastridae

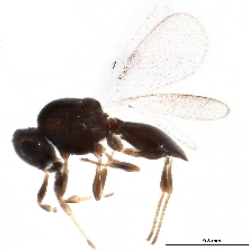

BIOUG22931-H09 [Lateral]  
Platygastridae  
Family: Platygastridae  
BIN URI: BOLD:ACV5870

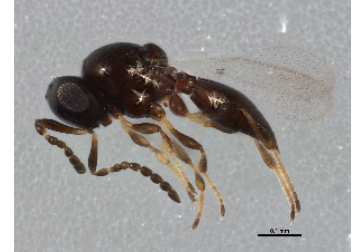

BIOUG10331-C03 [Lateral]  
Platygastridae  
Family: Platygastridae  
BIN URI: BOLD:ACL7730

BIOUG22927-B08 [Lateral]  
Platygastridae  
Family: Platygastridae  
BIN URI: BOLD:ACB3267

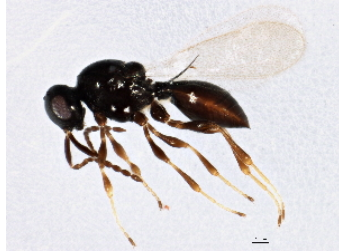

BIOUG01668-F08 [Lateral]  
Platygastridae  
Family: Platygastridae  
BIN URI: BOLD:AAZ3286

BIOUG22420-H11  
Platygastridae  
Family: Platygastridae

BIOUG22420-B02  
Platygastridae  
Family: Platygastridae

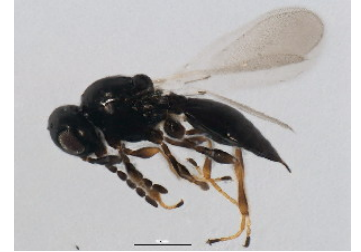

ASGLE-0350 [Lateral]  
Hymenoptera  
BIN URI: BOLD:AAU8342

IMAGE NOT AVAILABLE

IMAGE NOT AVAILABLE

IMAGE NOT AVAILABLE

IMAGE NOT AVAILABLE

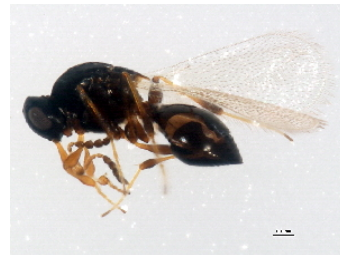

10PHMAL-0569 [Lateral]  
Leptacis  
Family: Platygastridae  
BIN URI: BOLD:ACK4473

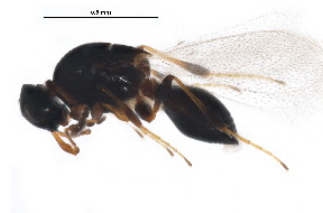

BIOUG22294-G01 [Lateral]  
Leptacis  
Family: Platygastridae  
BIN URI: BOLD:AAU8358

BIOUG23074-G07  
Leptacis  
Family: Platygastridae

BIOUG22723-F09  
Leptacis  
Family: Platygastridae

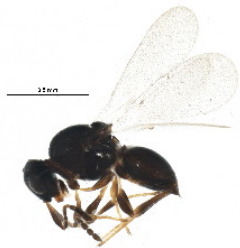

BIOUG22294-A09 [Lateral]  
Aceroteta  
Family: Platygastridae  
BIN URI: BOLD:AAU8455

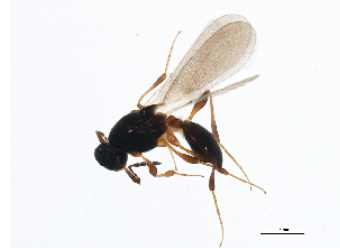

10PHMAL-0501 [Lateral]  
Leptacis  
Family: Platygastridae  
BIN URI: BOLD:AAU8380

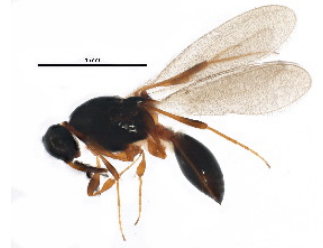

BIOUG22420-G11 [Lateral]  
Leptacis  
Family: Platygastridae  
BIN URI: BOLD:AAU8376

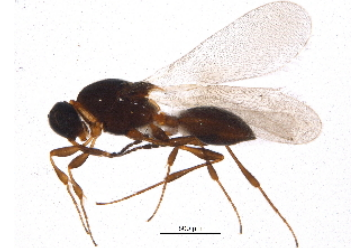

BIOUG15695-D04 [Lateral]  
Platygastridae  
Family: Platygastridae  
BIN URI: BOLD:ACP9550

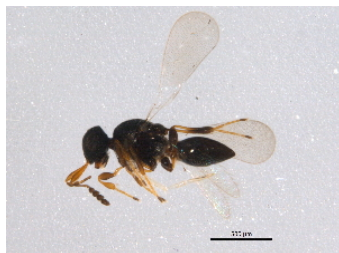

BIOUG07151-C07 [Lateral]  
Platygastridae  
Family: Platygastridae  
BIN URI: BOLD:ABW3209

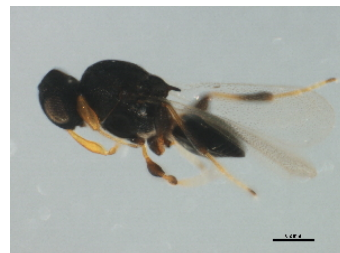

BIOUG01115-A03 [Lateral]  
Platygastridae  
Family: Platygastridae  
BIN URI: BOLD:ABA7956

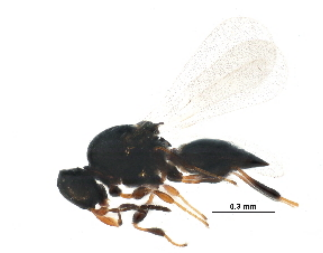

BIOUG13611-F08 [Lateral]  
Platygastridae  
Family: Platygastridae  
BIN URI: BOLD:ACO5382

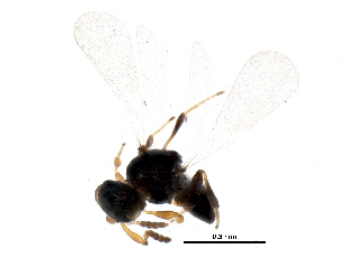

BIOUG22458-C12 [Lateral]  
Synopeas  
Family: Platygastridae  
BIN URI: BOLD:AAU8619

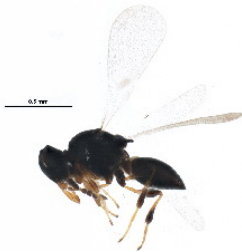

**BIOUG22453-B05 [Lateral]**  
Synopeas  
Family: Platygastridae  
BIN URI: BOLD:ACV2257

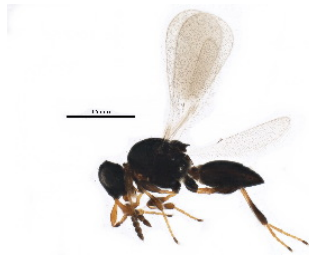

**BIOUG22420-E12 [Lateral]**  
Synopeas  
Family: Platygastridae  
BIN URI: BOLD:ACV2297

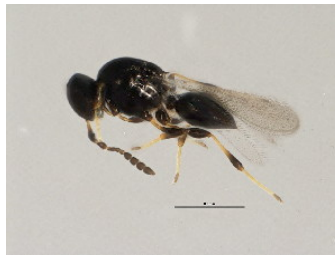

**ASGLE-0326 [Lateral]**  
Synopeas  
Family: Platygastridae  
BIN URI: BOLD:AAU8571

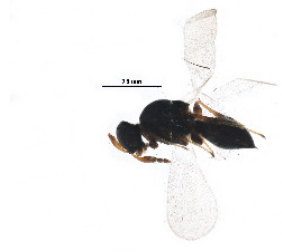

**BIOUG22727-B10 [Lateral]**  
Synopeas  
Family: Platygastridae  
BIN URI: BOLD:ACV5896

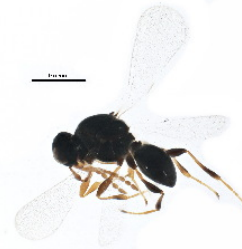

**BIOUG22464-G06 [Lateral]**  
Synopeas  
Family: Platygastridae  
BIN URI: BOLD:ACV4251

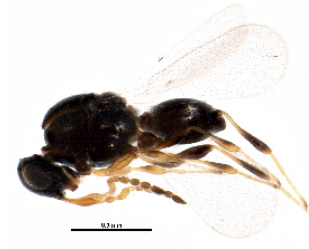

**BIOUG22458-H10 [Lateral]**  
Synopeas  
Family: Platygastridae  
BIN URI: BOLD:ACV4801

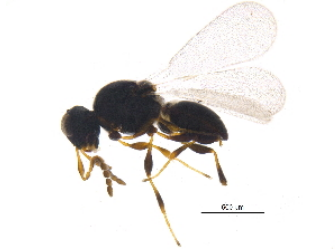

**BIOUG22465-F08 [Lateral]**  
Synopeas  
Family: Platygastridae  
BIN URI: BOLD:ACV5947

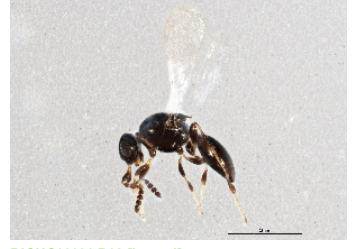

**BIOUG03031-B08 [Lateral]**  
Synopeas pennsylvanicum  
Family: Platygastridae  
BIN URI: BOLD:ABA6127

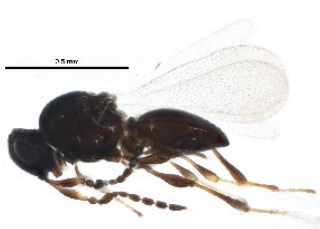

**BIOUG10328-A12 [Lateral]**  
Platygastrinae  
Family: Platygastridae  
BIN URI: BOLD:ACL8696

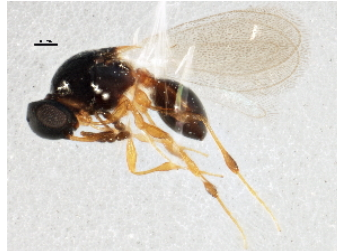

**BIOUG02935-G12 [Lateral]**  
Leptacis  
Family: Platygastridae  
BIN URI: BOLD:ABA5944

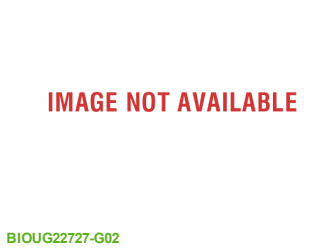

**BIOUG22727-G02**  
Leptacis  
Family: Platygastridae

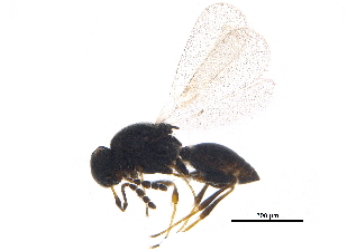

**BIOUG22838-E12 [Lateral]**  
Platygastridae  
Family: Platygastridae  
BIN URI: BOLD:ACW0287

**IMAGE NOT AVAILABLE**

**BIOUG22420-E07**  
Synopeas  
Family: Platygastridae

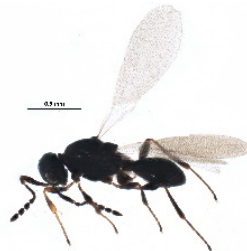

**BIOUG22724-B04 [Lateral]**  
Platygastridae  
Family: Platygastridae  
BIN URI: BOLD:AAG7963

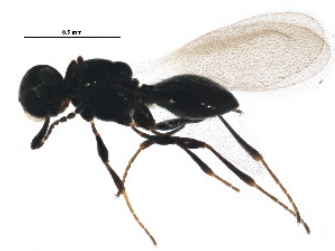

**BIOUG22288-F08 [Lateral]**  
Platygastridae  
Family: Platygastridae  
BIN URI: BOLD:AAU8377

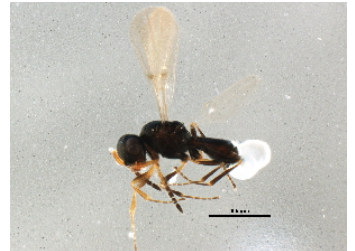

**BIOUG08878-B10 [Lateral]**  
Platygastridae  
Family: Platygastridae  
BIN URI: BOLD:ACK5301

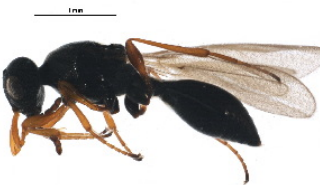

**BIOUG22287-C03 [Lateral]**  
Platygastridae  
Family: Platygastridae  
BIN URI: BOLD:ACV2411

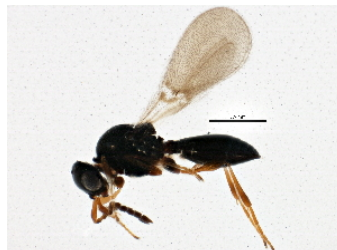

**BIOUG05606-D11 [Lateral]**  
Trichacis  
Family: Platygastridae  
BIN URI: BOLD:AAU8203

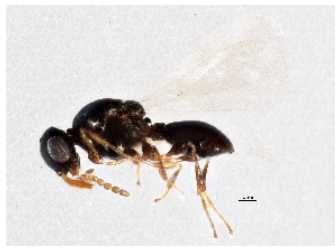

**BIOUG03031-B10 [Lateral]**  
Platygastridae  
Family: Platygastridae  
BIN URI: BOLD:ACA7711

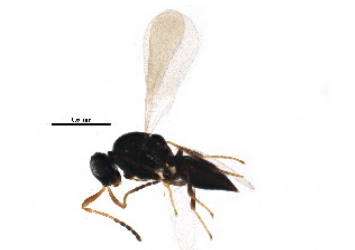

**BIOUG22420-C09 [Lateral]**  
Platygastridae  
Family: Platygastridae  
BIN URI: BOLD:ACK5386

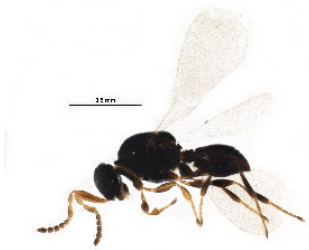

**BIOUG22421-C04 [Lateral]**  
Platygastridae  
Family: Platygastridae  
BIN URI: BOLD:ACV2386

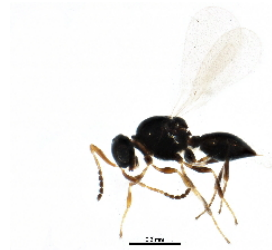

**BIOUG22358-B08 [Lateral]**  
Platygastridae  
Family: Platygastridae  
BIN URI: BOLD:ACV3072

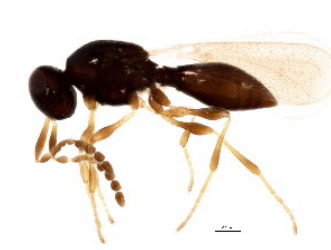

**BIOUG01625-E05 [Lateral]**  
Platygastrinae  
Family: Platygastridae  
BIN URI: BOLD:ABW3169

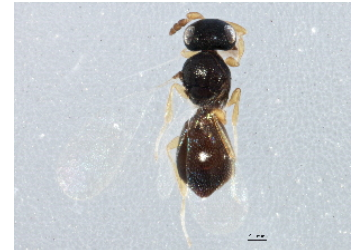

**BIOUG01600-G11 [Dorsal]**  
Platygastridae  
Family: Platygastridae  
BIN URI: BOLD:ABW3140

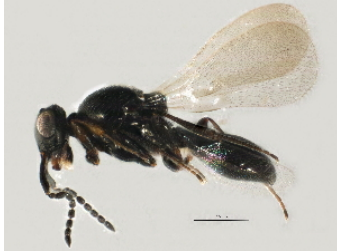

**BIOUG08483-E09 [Lateral]**  
Platygastridae  
Family: Platygastridae  
BIN URI: BOLD:ACJ8807

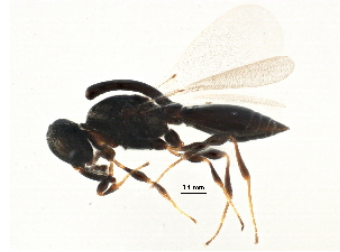

**BIOUG08589-A08 [Lateral]**  
Platygastridae  
Family: Platygastridae  
BIN URI: BOLD:ACK1238

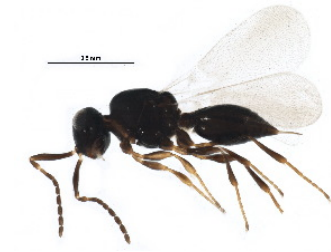

**BIOUG22421-F11 [Lateral]**  
Platygastridae  
Family: Platygastridae  
BIN URI: BOLD:ACV2155

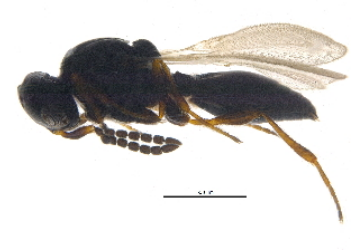

**BIOUG21947-B05 [Lateral]**  
Platygastridae  
Family: Platygastridae  
BIN URI: BOLD:ACU4949

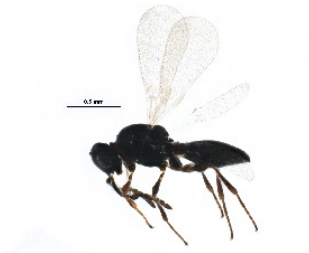

**BIOUG22294-D08 [Lateral]**  
Platygastridae  
Family: Platygastridae  
BIN URI: BOLD:ACL4888

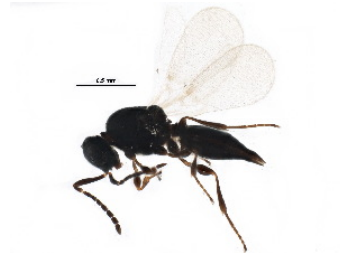

**BIOUG22421-B08 [Lateral]**  
Platygastridae  
Family: Platygastridae  
BIN URI: BOLD:ACV2372

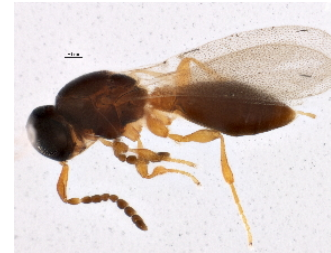

**BIOUG03347-B10 [Lateral]**  
Platygastridae  
Family: Platygastridae  
BIN URI: BOLD:ABZ9638

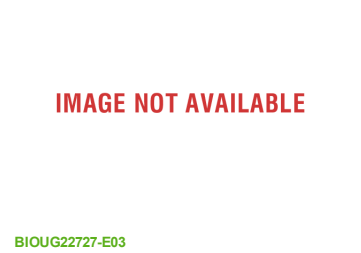

**BIOUG22727-E03**  
Platygastridae  
Family: Platygastridae

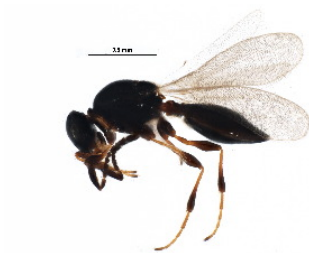

**BIOUG22294-B04 [Lateral]**  
Platygastridae  
Family: Platygastridae  
BIN URI: BOLD:AAG7977

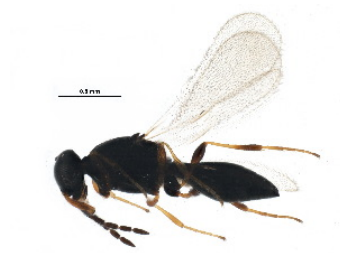

**BIOUG21773-A01 [Lateral]**  
Platygastrinae  
Family: Platygastridae  
BIN URI: BOLD:ACF9268

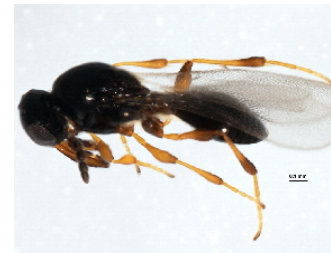

**ASGLE2-0251 [Lateral]**  
Hymenoptera  
BIN URI: BOLD:AAU8566

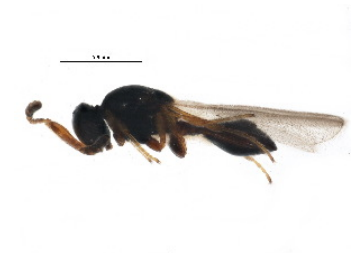

**BIOUG20970-F08 [Lateral]**  
Hymenoptera  
BIN URI: BOLD:ACU8608

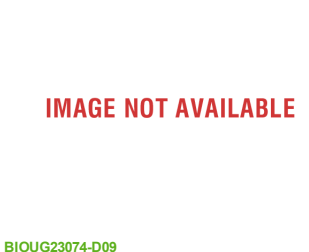

**BIOUG23074-D09**  
Platygastridae  
Family: Platygastridae

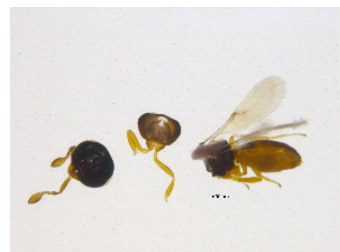

**BIOUG03408-E04 [Lateral]**  
Platygastridae  
Family: Platygastridae  
BIN URI: BOLD:ACC1046

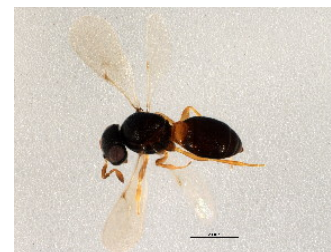

**BIOUG01665-A10 [Lateral]**  
Scelioninae  
Family: Platygastridae  
BIN URI: BOLD:ABA6154

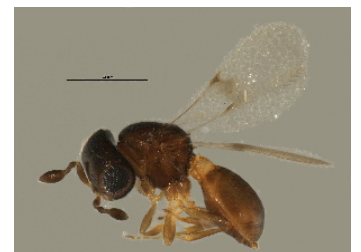

**BIOUG07004-D12 [Lateral]**  
Platygastridae  
Family: Platygastridae  
BIN URI: BOLD:ACH3788

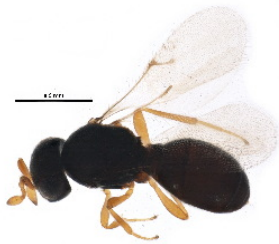

**BIOUG22626-B06 [Lateral]**  
Platygastridae  
Family: Platygastridae  
BIN URI: BOLD:ACV5042

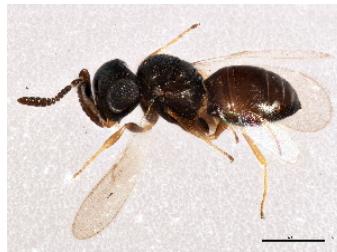

**BIOUG05645-A03 [Lateral]**  
Platygastridae  
Family: Platygastridae  
BIN URI: BOLD:ACF7191

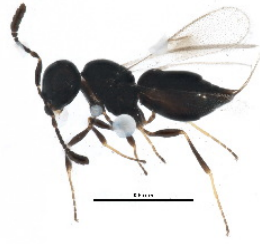

**BIOUG22453-E04 [Lateral]**  
Platygastridae  
Family: Platygastridae  
BIN URI: BOLD:ACV1908

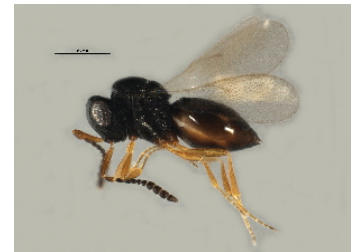

**BIOUG08724-E06 [Lateral]**  
Platygastridae  
Family: Platygastridae  
BIN URI: BOLD:ACK2828

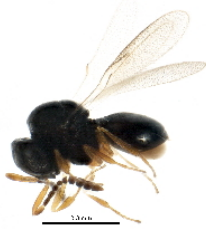

**BIOUG23074-B10 [Lateral]**  
Platygastridae  
Family: Platygastridae  
BIN URI: BOLD:ACV5862

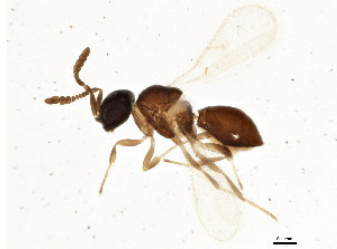

**BIOUG01605-H08 [Lateral]**  
Telenomus  
Family: Platygastridae  
BIN URI: BOLD:ABW3189

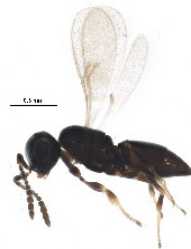

**BIOUG22464-F05 [Lateral]**  
Scelioninae  
Family: Platygastridae  
BIN URI: BOLD:AAG7898

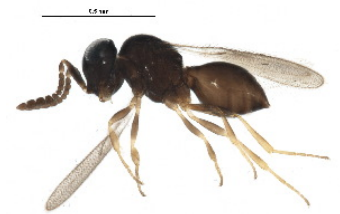

**BIOUG22453-A05 [Lateral]**  
Telenomus  
Family: Platygastridae  
BIN URI: BOLD:ACV2493

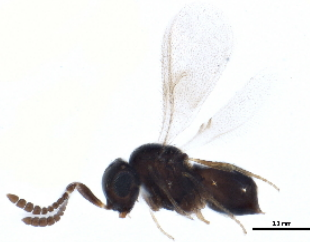

**BIOUG11469-H08 [Lateral]**  
Scelioninae  
Family: Platygastridae  
BIN URI: BOLD:ACA7752

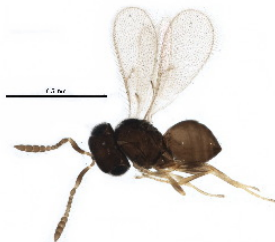

**BIOUG22421-F10 [Lateral]**  
Scelioninae  
Family: Platygastridae  
BIN URI: BOLD:AAG7897

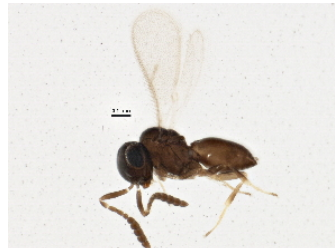

**BIOUG03770-G03 [Lateral]**  
Scelioninae  
Family: Platygastridae  
BIN URI: BOLD:ABA6117

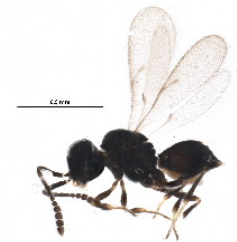

**BIOUG21773-A10 [Lateral]**  
Platygastridae  
Family: Platygastridae  
BIN URI: BOLD:ACC5761

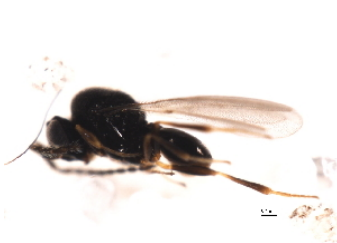

**09BBEHY-1571 [Lateral]**  
Telenomus  
Family: Platygastridae  
BIN URI: BOLD:AAN7574

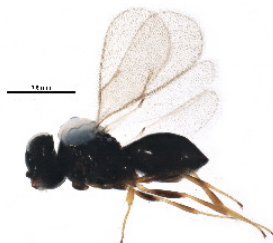

**BIOUG22931-G05 [Lateral]**  
Telenomus  
Family: Platygastridae  
BIN URI: BOLD:ABZ8566

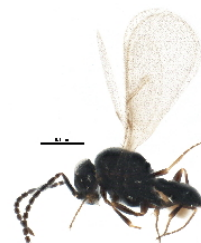

**BIOUG08532-F10 [Lateral]**  
Platygastridae  
Family: Platygastridae  
BIN URI: BOLD:ABW3231

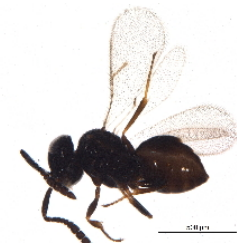

**BIOUG09932-G08 [Lateral]**  
Platygastridae  
Family: Platygastridae  
BIN URI: BOLD:ACL3059

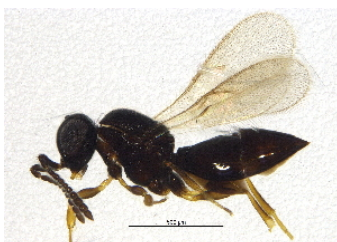

**BIOUG05001-A11 [Lateral]**  
Telenomus  
Family: Platygastridae  
BIN URI: BOLD:ACJ5136

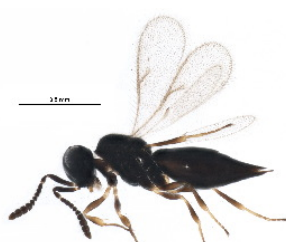

**BIOUG22294-F06 [Lateral]**  
Telenomus  
Family: Platygastridae  
BIN URI: BOLD:ACV3598

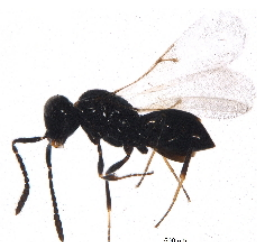

**BIOUG16984-F10 [Lateral]**  
Platygastridae  
Family: Platygastridae  
BIN URI: BOLD:ACR4826

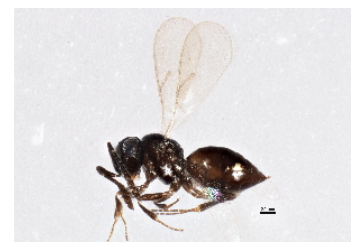

**BIOUG05679-A01 [Lateral]**  
Telenomus  
Family: Platygastridae  
BIN URI: BOLD:AAU8457



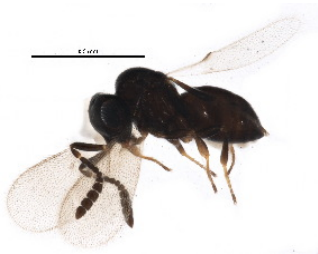

**BIOUG22723-F03 [Lateral]**  
Telenomus  
Family: Platygasteridae  
BIN URI: BOLD:AAU8347

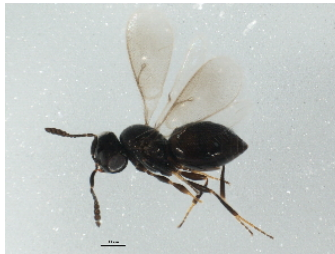

**BIOUG05591-E06 [Lateral]**  
Telenomus  
Family: Platygasteridae  
BIN URI: BOLD:ABY4994

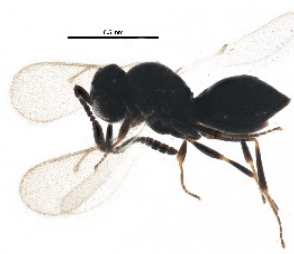

**BIOUG22294-F08 [Lateral]**  
Platygasteridae  
Family: Platygasteridae  
BIN URI: BOLD:ACV4221

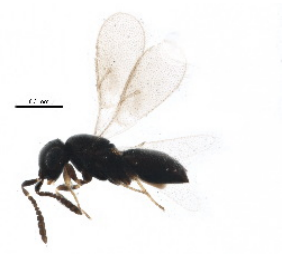

**BIOUG21773-B04 [Lateral]**  
Scelioninae  
Family: Platygasteridae  
BIN URI: BOLD:ACE0660

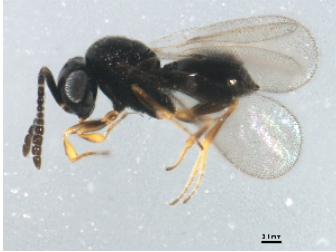

**BIOUG01029-F10 [Lateral]**  
Platygasteridae  
Family: Platygasteridae  
BIN URI: BOLD:ABA5945

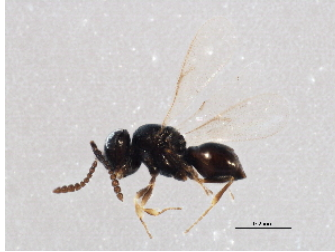

**BIOUG10661-D01 [Lateral]**  
Platygasteridae  
Family: Platygasteridae  
BIN URI: BOLD:ACL8091

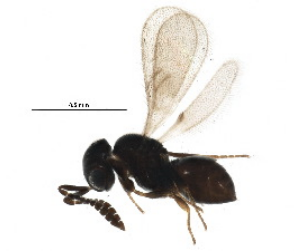

**BIOUG22294-A08 [Lateral]**  
Telenomus  
Family: Platygasteridae  
BIN URI: BOLD:AAZ3289

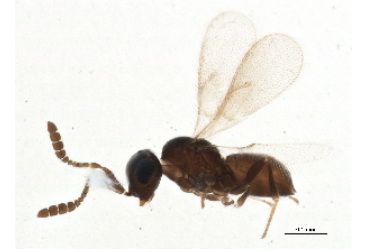

**BIOUG03844-F04 [Lateral]**  
Platygasteridae  
Family: Platygasteridae  
BIN URI: BOLD:ACB0797

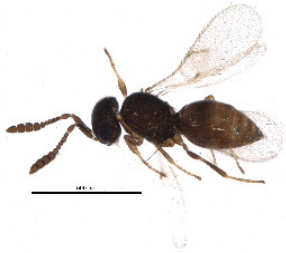

**BIOUG20316-H11 [Lateral]**  
Telenomus  
Family: Platygasteridae  
BIN URI: BOLD:ACU0247

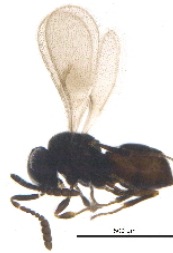

**BIOUG21771-G08 [Lateral]**  
Telenomus  
Family: Platygasteridae  
BIN URI: BOLD:ACC7846

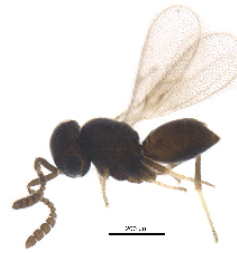

**BIOUG21771-F07 [Lateral]**  
Telenomus  
Family: Platygasteridae

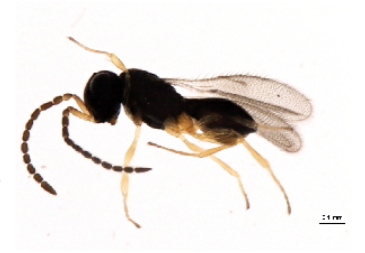

**10BBHYM-1526 [Lateral]**  
Telenomus  
Family: Platygasteridae  
BIN URI: BOLD:AAW8025

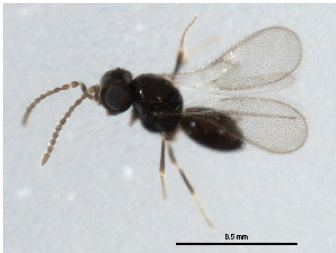

**10BBCHY-1191 [Lateral]**  
Telenomus  
Family: Platygasteridae  
BIN URI: BOLD:AAU9339

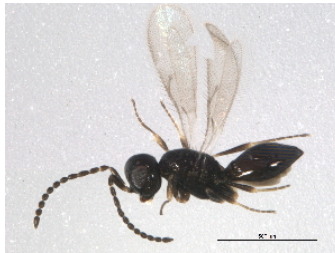

**BIOUG08491-D05 [Lateral]**  
Scelioninae  
Family: Platygasteridae  
BIN URI: BOLD:ABW3159

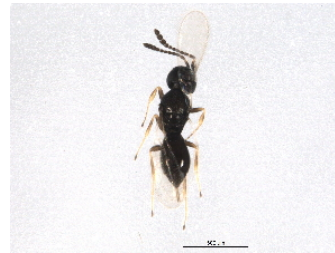

**BIOUG08683-D03 [Dorsal]**  
Platygasteridae  
Family: Platygasteridae  
BIN URI: BOLD:ACJ0111

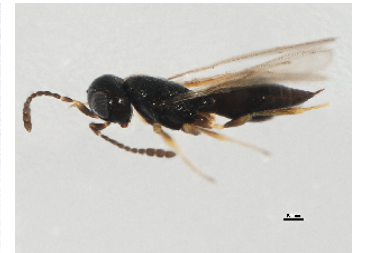

**BIOUG00836-D06 [Lateral]**  
Telenomus  
Family: Platygasteridae  
BIN URI: BOLD:AAU4881

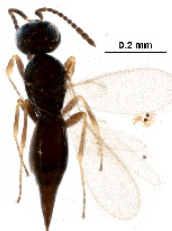

**BIOUG10805-D10 [Dorsal]**  
Telenomus  
Family: Platygasteridae  
BIN URI: BOLD:ACL8683

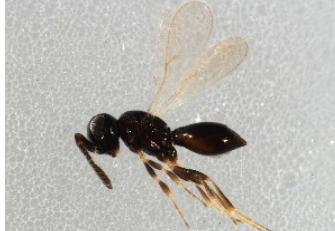

**BIOUG01661-F08 [Lateral]**  
Telenomus  
Family: Platygasteridae  
BIN URI: BOLD:ABA6298

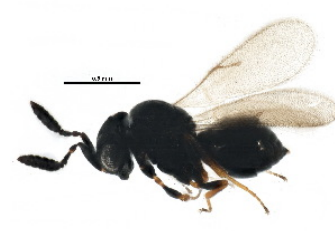

**BIOUG22421-D05 [Lateral]**  
Trissolcus  
Family: Platygasteridae  
BIN URI: BOLD:ACJ6984

**IMAGE NOT AVAILABLE**

**BIOUG22464-B11**  
Telenomus  
Family: Platygasteridae

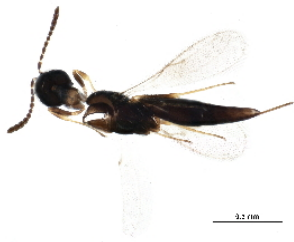

**BIOUG23320-H05 [Lateral]**  
Platygastridae  
Family: Platygastridae  
BIN URI: BOLD:ACW1217

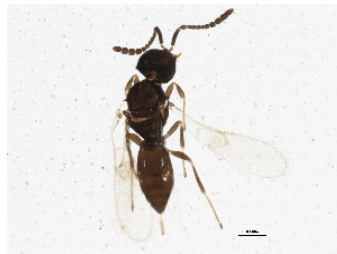

**BIOUG02984-A02 [Dorsal]**  
Scelioninae  
Family: Platygastridae  
BIN URI: BOLD:AAU4830

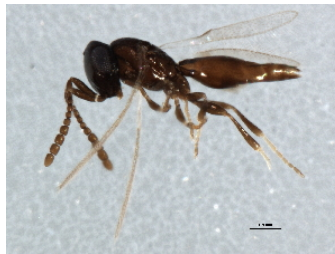

**BIOUG01657-C10 [Lateral]**  
Telenomus  
Family: Platygastridae  
BIN URI: BOLD:ABA6265

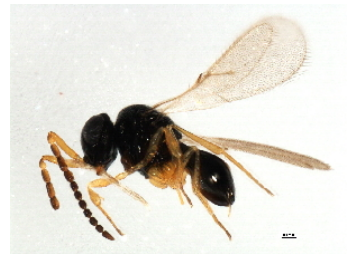

**BIOUG00837-F12 [Lateral]**  
Telenomus  
Family: Platygastridae  
BIN URI: BOLD:AAY9192

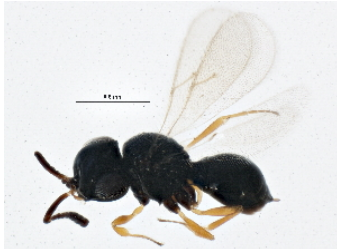

**BIOUG03445-B02 [Lateral]**  
Telenomus podisi  
Family: Platygastridae  
BIN URI: BOLD:ACB2589

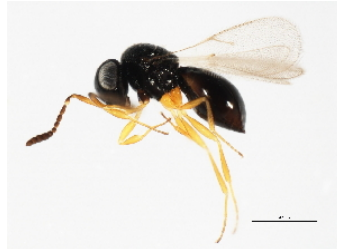

**BIOUG00837-G02 [Lateral]**  
Telenomus podisi  
Family: Platygastridae  
BIN URI: BOLD:AAG7891

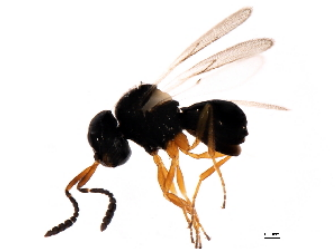

**10BBHYM-1426 [Lateral]**  
Telenomus  
Family: Platygastridae  
BIN URI: BOLD:ACM2546

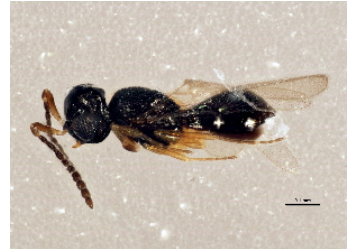

**BIOUG03368-F09 [Lateral]**  
Platygastridae  
Family: Platygastridae  
BIN URI: BOLD:ABA5995

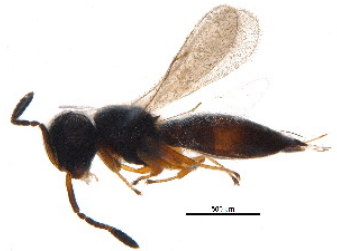

**BIOUG21221-G08 [Lateral]**  
Hymenoptera  
BIN URI: BOLD:ACV0111

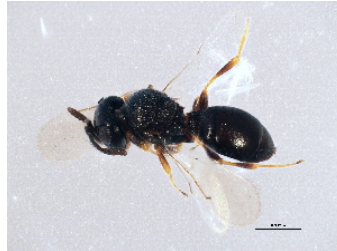

**BIOUG06454-H10 [Lateral]**  
Platygastridae  
Family: Platygastridae  
BIN URI: BOLD:ACI5029

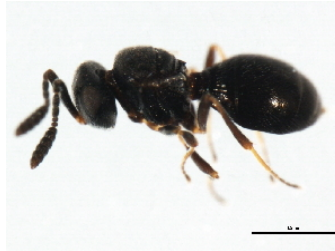

**TWPARA-1026 [Lateral]**  
Platygastridae  
Family: Platygastridae  
BIN URI: BOLD:AAG7886

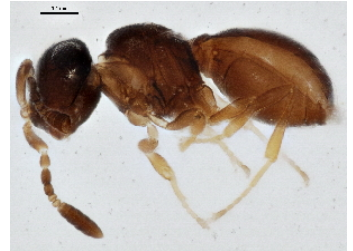

**BIOUG02642-B02 [Lateral]**  
Trimorus  
Family: Platygastridae  
BIN URI: BOLD:ABY2758

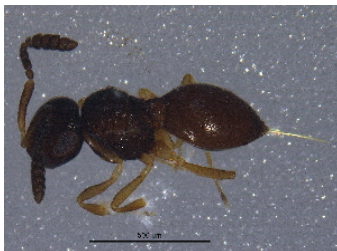

**BIOUG08038-E04 [Lateral]**  
Trimorus  
Family: Platygastridae  
BIN URI: BOLD:ACI9917

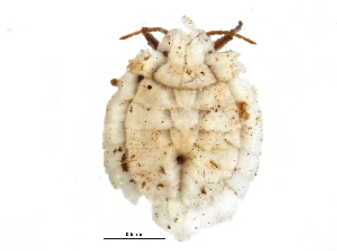

**BIOUG24001-F12 [Dorsal]**  
Orthezidae  
Family: Orthezidae

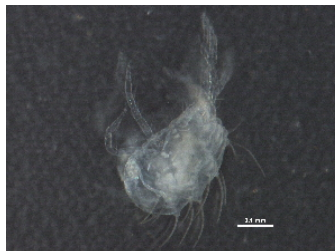

**BIOUG16050-A05 [Dorsal]**  
Panonychus  
Family: Tetranychidae  
BIN URI: BOLD:ACK1507

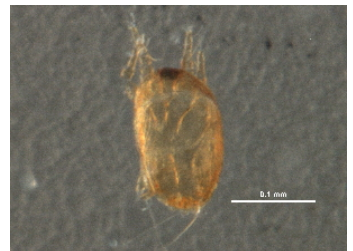

**BIOUG10411-D05 [Dorsal]**  
Tetranychidae  
Family: Tetranychidae  
BIN URI: BOLD:ACL6075

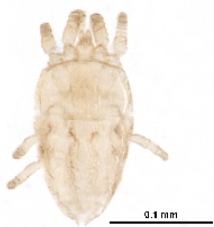

**BIOUG21884-B03 [Dorsal]**  
Tetranychidae  
Family: Tetranychidae  
BIN URI: BOLD:ACV5964

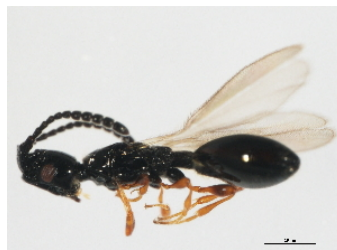

**10PHMAL-0745 [Lateral]**  
Diapriidae  
Family: Diapriidae  
BIN URI: BOLD:AAM7500

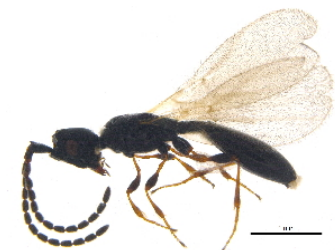

**BIOUG21771-G02 [Lateral]**  
Diapriidae  
Family: Diapriidae  
BIN URI: BOLD:ACM6785

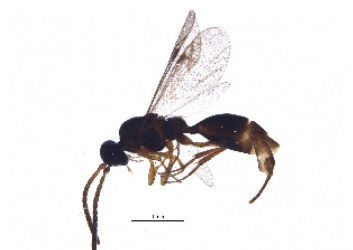

**BIOUG13244-A10 [Lateral]**  
Proctotrupidae  
Family: Proctotrupidae  
BIN URI: BOLD:ACN9830

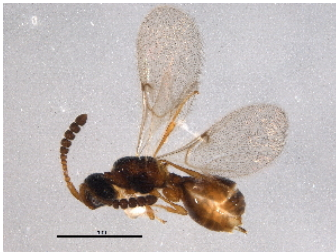

**BIOUG06449-D02 [Lateral]**  
Diapriidae  
Family: Diapriidae  
BIN URI: BOLD:ACI4484

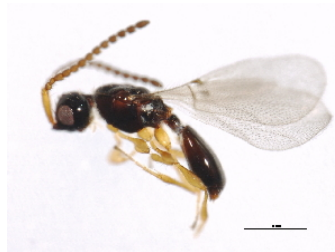

**09BBEHY-0900 [Lateral]**  
Diapriidae  
Family: Diapriidae  
BIN URI: BOLD:ACC8030

IMAGE NOT AVAILABLE

**BIOUG22931-H02**  
Diapriidae  
Family: Diapriidae

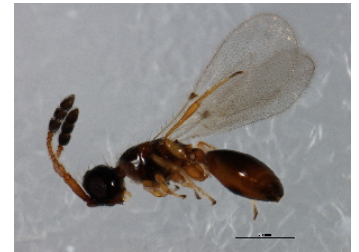

**09BBEHY-1795 [Lateral]**  
Diapriidae  
Family: Diapriidae  
BIN URI: BOLD:AAM7457

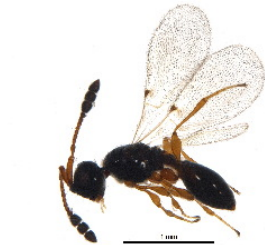

**BIOUG24007-E07 [Lateral]**  
Diapriidae  
Family: Diapriidae

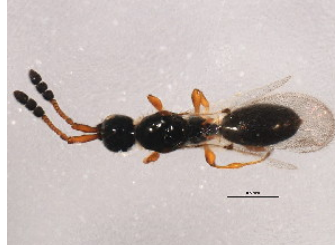

**10BBCHY-2997 [Dorsal]**  
Diapriidae  
Family: Diapriidae  
BIN URI: BOLD:AAN7572

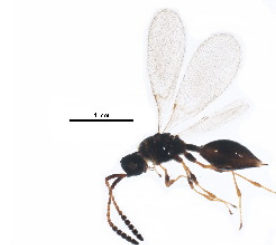

**BIOUG22294-G09 [Lateral]**  
Diapriidae  
Family: Diapriidae  
BIN URI: BOLD:AAU8803

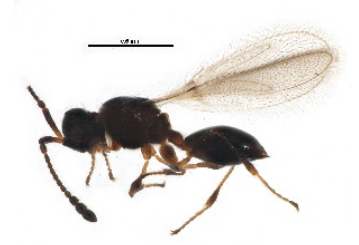

**BIOUG22420-B07 [Lateral]**  
Diapriidae  
Family: Diapriidae  
BIN URI: BOLD:ACF9546

IMAGE NOT AVAILABLE

**BIOUG21888-E06**  
Trichopria  
Family: Diapriidae

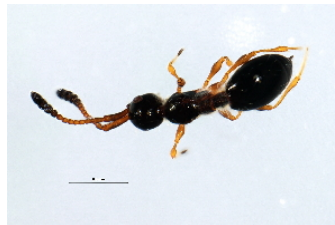

**08BBHYM-1324 [Dorsal]**  
Diapriidae  
Family: Diapriidae  
BIN URI: BOLD:AAG7956

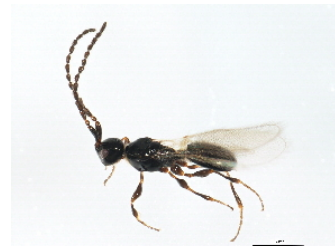

**ASGLE-1229 [Lateral]**  
Hymenoptera  
BIN URI: BOLD:AAM7487

IMAGE NOT AVAILABLE

**BIOUG22458-G06**  
Diapriidae  
Family: Diapriidae

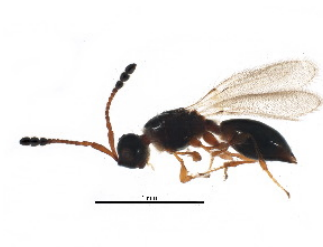

**BIOUG22420-A08 [Lateral]**  
Diapriidae  
Family: Diapriidae  
BIN URI: BOLD:AAG7899

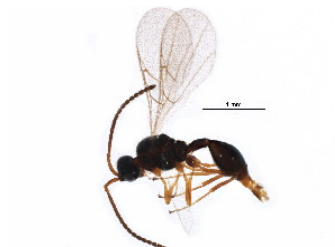

**BIOUG22420-A10 [Lateral]**  
Diapriidae  
Family: Diapriidae  
BIN URI: BOLD:ACK2907

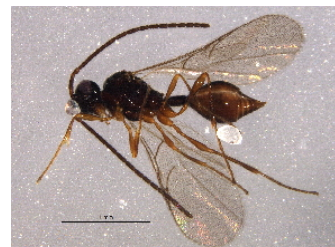

**BIOUG06285-G12 [Lateral]**  
Diapriidae  
Family: Diapriidae  
BIN URI: BOLD:ACM1952

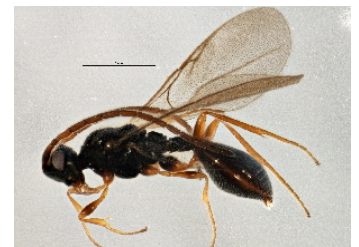

**BIOUG05828-D09 [Lateral]**  
Diapriidae  
Family: Diapriidae  
BIN URI: BOLD:AAU8802

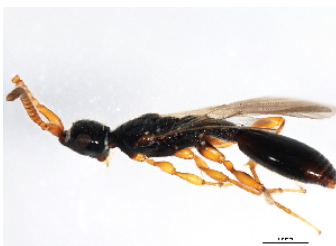

**ASGLE2-0240 [Lateral]**  
Hymenoptera  
BIN URI: BOLD:AAU8736

IMAGE NOT AVAILABLE

**BIOUG22862-H11**  
Diapriidae  
Family: Diapriidae

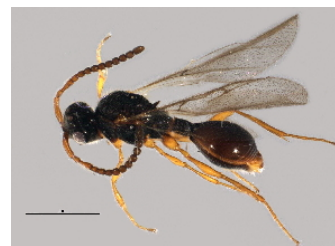

**BIOUG12297-G10 [Lateral]**  
Diapriidae  
Family: Diapriidae  
BIN URI: BOLD:ACN0910

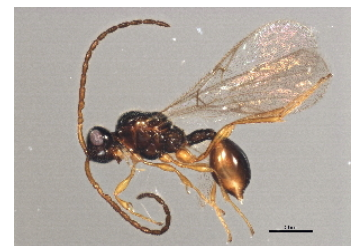

**BIOUG04477-A09 [Lateral]**  
Diapriidae  
Family: Diapriidae  
BIN URI: BOLD:ABZ9639

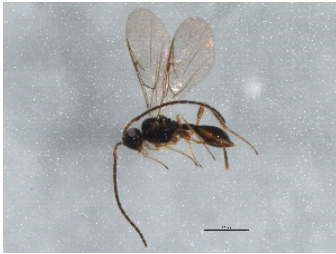

**BIOUG04120-C05 [Lateral]**  
Diapriidae  
Family: Diapriidae  
BIN URI: BOLD:AAU9080

IMAGE NOT AVAILABLE

**BIOUG22420-D09**  
Diapriidae  
Family: Diapriidae

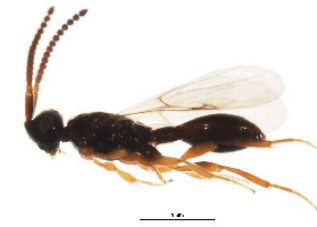

**BIOUG01049-F07 [Lateral]**  
Diapriidae  
Family: Diapriidae  
BIN URI: BOLD:ABA6056

IMAGE NOT AVAILABLE

**BIOUG22723-B03**  
Diapriidae  
Family: Diapriidae

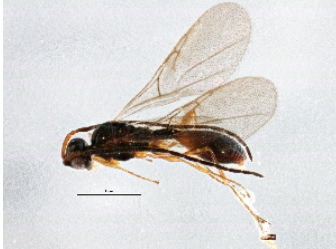

**BIOUG02921-F03 [Lateral]**  
Diapriidae  
Family: Diapriidae  
BIN URI: BOLD:AAU8821

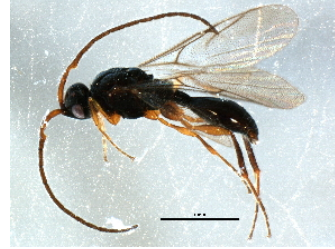

**BIOUG10408-B11 [Lateral]**  
Diapriidae  
Family: Diapriidae  
BIN URI: BOLD:ACL5283

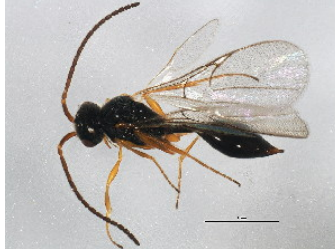

**ASGLE-0930 [Dorsal]**  
Hymenoptera  
BIN URI: BOLD:AAU8448

IMAGE NOT AVAILABLE

**BIOUG22421-F09**  
Diapriidae  
Family: Diapriidae

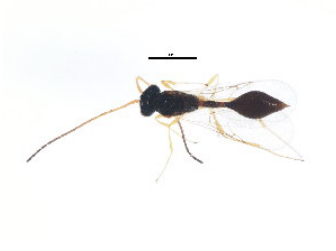

**BIOUG00857-C12 [Dorsal]**  
Diapriidae  
Family: Diapriidae  
BIN URI: BOLD:AAU7559

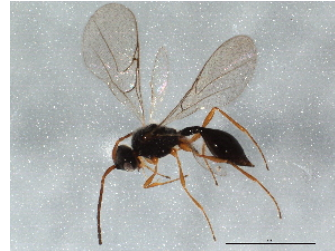

**BIOUG05520-D03 [Lateral]**  
Diapriidae  
Family: Diapriidae  
BIN URI: BOLD:AAU8399

IMAGE NOT AVAILABLE

**BIOUG22727-A10**  
Diapriidae  
Family: Diapriidae

IMAGE NOT AVAILABLE

**BIOUG22870-F04**  
Diapriidae  
Family: Diapriidae

IMAGE NOT AVAILABLE

**BIOUG22867-C04**  
Diapriidae  
Family: Diapriidae

IMAGE NOT AVAILABLE

**BIOUG22872-G12**  
Diapriidae  
Family: Diapriidae

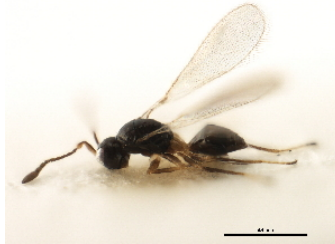

**CNCHYM 07498 [Lateral]**  
Ooctonus silvensis  
Family: Myrmaridae  
BIN URI: BOLD:AAU7553

IMAGE NOT AVAILABLE

**BIOUG22723-B11**  
Ooctonus silvensis  
Family: Myrmaridae

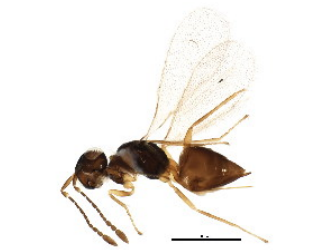

**BIOUG01625-G04 [Lateral]**  
Ooctonus  
Family: Myrmaridae  
BIN URI: BOLD:AAU9180

IMAGE NOT AVAILABLE

**BIOUG22421-C06**  
Ooctonus  
Family: Myrmaridae

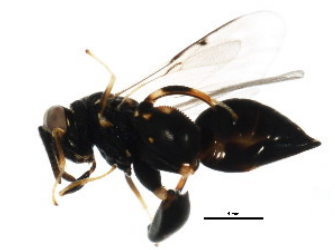

**BIOUG01285-G08 [Lateral]**  
Conura albifrons  
Family: Chalcididae  
BIN URI: BOLD:AAG8371

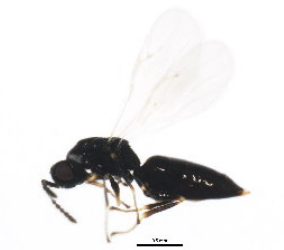

**BIOUG01031-G09 [Lateral]**  
Eurytomidae  
Family: Eurytomidae  
BIN URI: BOLD:ABA5950

IMAGE NOT AVAILABLE

BIOUG22458-C08  
Eurytomidae  
Family: Eurytomidae

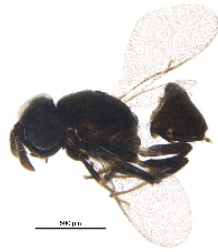

BIOUG22578-A05 [Lateral]  
Hymenoptera  
BIN URI: BOLD:ACV3733

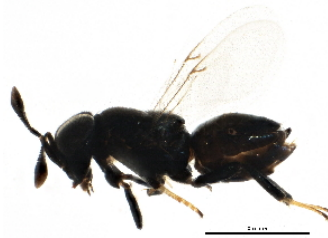

BIOUG22927-C01 [Lateral]  
Hymenoptera  
BIN URI: BOLD:ACV5208

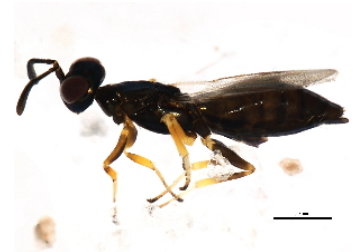

10BBHYM-0552 [Lateral]  
Hymenoptera  
BIN URI: BOLD:AA7767

IMAGE NOT AVAILABLE

BIOUG22862-A01  
Aphelinidae  
Family: Aphelinidae

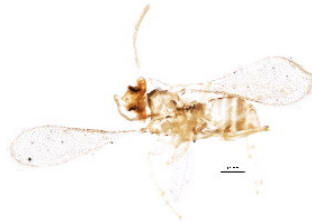

BIOUG01757-B10 [Lateral]  
Aphelinidae  
Family: Aphelinidae  
BIN URI: BOLD:ABV2721

IMAGE NOT AVAILABLE

BIOUG23074-H09  
Aphelinidae  
Family: Aphelinidae

IMAGE NOT AVAILABLE

BIOUG23085-H04  
Aphelinidae  
Family: Aphelinidae

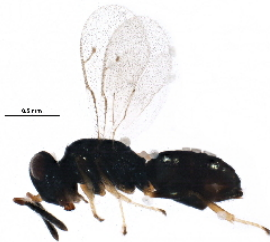

BIOUG24009-D07 [Lateral]  
Pteromalidae  
Family: Pteromalidae

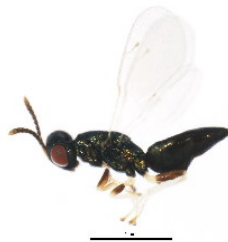

BIOUG01035-D09 [Lateral]  
Pteromalidae  
Family: Pteromalidae  
BIN URI: BOLD:ABA5961

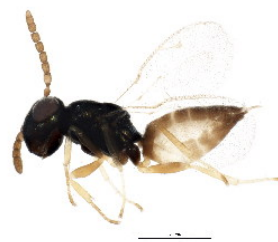

BIOUG01625-F04 [Lateral]  
Pteromalidae  
Family: Pteromalidae  
BIN URI: BOLD:AAG7969

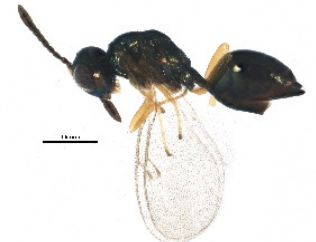

BIOUG22464-H09 [Lateral]  
Pteromalidae  
Family: Pteromalidae  
BIN URI: BOLD:ACD0889

IMAGE NOT AVAILABLE

BIOUG21888-A02  
Pteromalidae  
Family: Pteromalidae

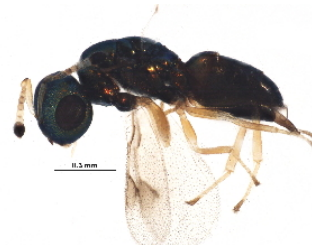

BIOUG07356-A10 [Lateral]  
Mesopolobus bruchophagi  
Family: Pteromalidae  
BIN URI: BOLD:ACL4975

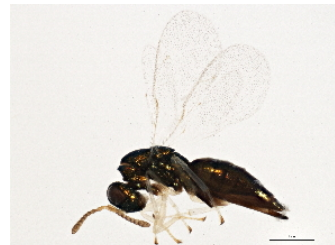

BIOUG03031-G11 [Lateral]  
Pteromalidae  
Family: Pteromalidae  
BIN URI: BOLD:AAU9045

IMAGE NOT AVAILABLE

BIOUG22294-F11  
Pteromalidae  
Family: Pteromalidae

IMAGE NOT AVAILABLE

BIOUG22420-G12  
Pteromalidae  
Family: Pteromalidae

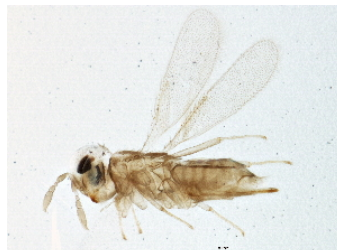

BIOUG05962-B02 [Lateral]  
Aphelinidae  
Family: Aphelinidae  
BIN URI: BOLD:AAZ5700

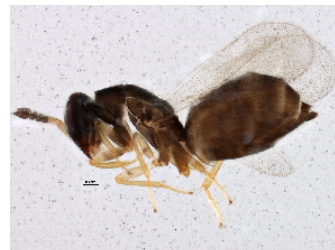

BIOUG03740-E11 [Lateral]  
Eulophidae  
Family: Eulophidae  
BIN URI: BOLD:AAP6693

IMAGE NOT AVAILABLE

BIOUG22464-C12  
Eulophidae  
Family: Eulophidae

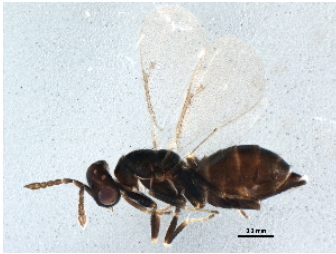

**BIOUG08609-F04 [Lateral]**  
Tetrastichinae  
Family: Eulophidae  
BIN URI: BOLD:ACK1316

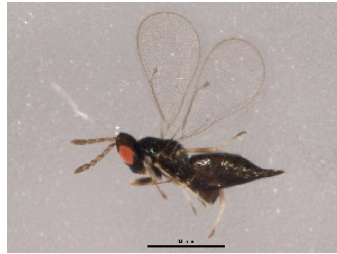

**PCPP10-0539 [Lateral]**  
Aprostocetus sp.  
Family: Eulophidae  
BIN URI: BOLD:ACR4067

IMAGE NOT AVAILABLE

**BIOUG22727-E10**  
Eulophidae  
Family: Eulophidae

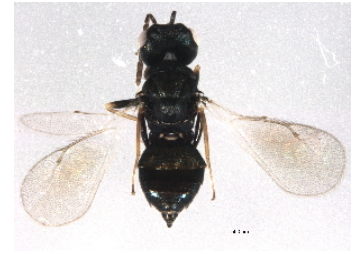

**BIOUG08683-D06 [Dorsal]**  
Eulophidae  
Family: Eulophidae  
BIN URI: BOLD:ACJ7211

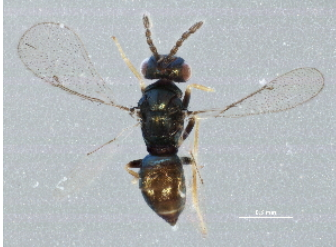

**BIOUG11552-A11 [Dorsal]**  
Tetrastichinae  
Family: Eulophidae  
BIN URI: BOLD:ACM1389

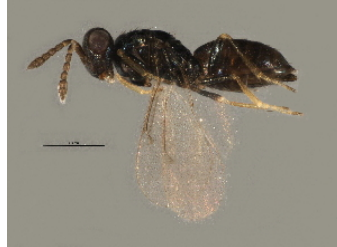

**BIOUG11566-B09 [Lateral]**  
Tetrastichinae  
Family: Eulophidae  
BIN URI: BOLD:ACM0812

IMAGE NOT AVAILABLE

**BIOUG22931-G08**  
Eulophidae  
Family: Eulophidae

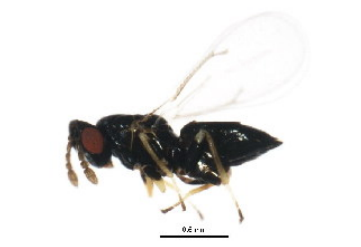

**BIOUG01035-B08 [Lateral]**  
Aprostocetus SS0288  
Family: Eulophidae  
BIN URI: BOLD:ABA5968

IMAGE NOT AVAILABLE

**BIOUG21888-E12**  
Eulophidae  
Family: Eulophidae

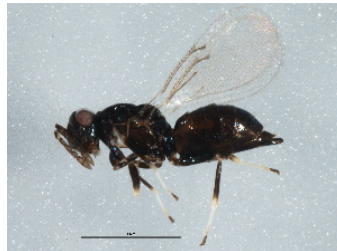

**BIOUG02984-E11 [Lateral]**  
Eulophidae  
Family: Eulophidae  
BIN URI: BOLD:ACO5919

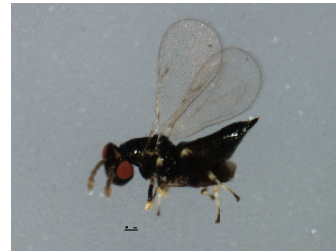

**08BBHYM-1434 [Lateral]**  
Tetrastichinae  
Family: Eulophidae  
BIN URI: BOLD:AAG7984

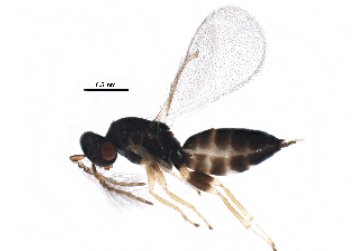

**BIOUG24009-D09 [Lateral]**  
Aprostocetus  
Family: Eulophidae

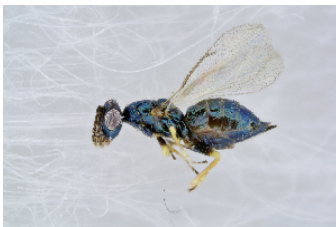

**BC-ZSM-HYM-21585-H02 [Lateral]**  
Tetrastichinae  
Family: Eulophidae  
BIN URI: BOLD:AAG7954

IMAGE NOT AVAILABLE

**BIOUG23085-C08**  
Baryscapus  
Family: Eulophidae

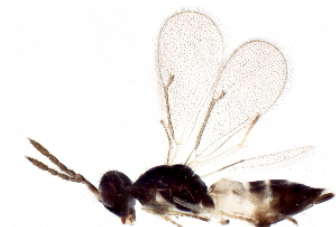

**BIOUG24011-H05 [Lateral]**  
Eulophidae  
Family: Eulophidae

IMAGE NOT AVAILABLE

**BIOUG22724-D08**  
Eulophidae  
Family: Eulophidae

IMAGE NOT AVAILABLE

**BIOUG23074-E07**  
Eulophidae  
Family: Eulophidae

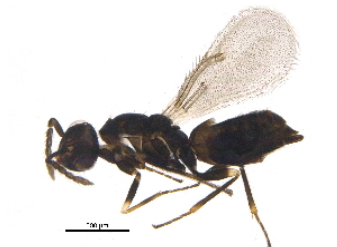

**BIOUG22578-B06 [Lateral]**  
Eulophidae  
Family: Eulophidae  
BIN URI: BOLD:ACV4378

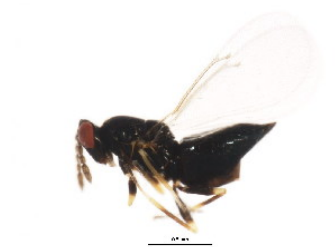

**BIOUG01049-C07 [Lateral]**  
Eulophidae  
Family: Eulophidae  
BIN URI: BOLD:ABA6122

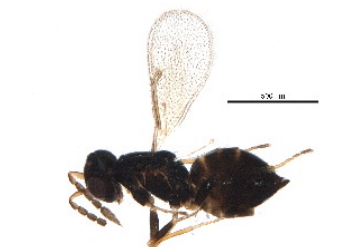

**BIOUG24007-E02 [Lateral]**  
Eulophidae  
Family: Eulophidae

IMAGE NOT AVAILABLE

BIOUG22927-B04  
Eulophidae  
Family: Eulophidae

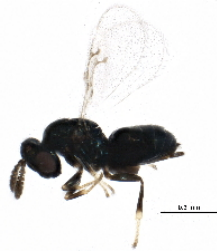

BIOUG24012-B01 [Lateral]  
Eulophidae  
Family: Eulophidae

IMAGE NOT AVAILABLE

BIOUG24012-B06  
Eulophidae  
Family: Eulophidae

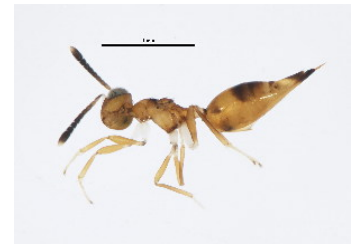

BIOUG00857-A10 [Lateral]  
Eulophidae  
Family: Eulophidae  
BIN URI: BOLD:AAZ5709

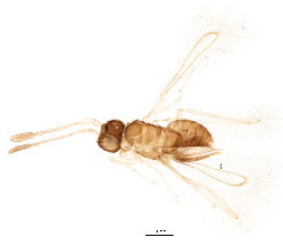

BIOUG01601-E12 [Lateral]  
Mymaridae  
Family: Mymaridae  
BIN URI: BOLD:AAF1974

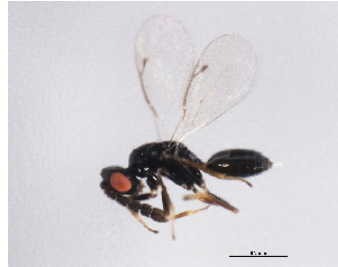

BIOUG01018-H01 [Lateral]  
Tetrastichinae  
Family: Eulophidae  
BIN URI: BOLD:AAG3957

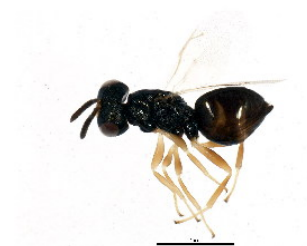

BIOUG01285-A10 [Lateral]  
Aphytis  
Family: Aphelinidae  
BIN URI: BOLD:ABW3280

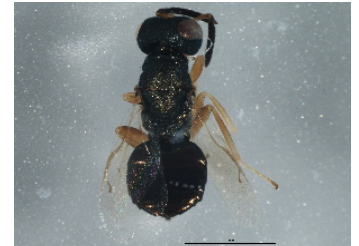

BIOUG05512-C06 [Dorsal]  
Aphelinidae  
Family: Aphelinidae  
BIN URI: BOLD:ACF8608

IMAGE NOT AVAILABLE

BIOUG22723-D03  
Aphelinidae  
Family: Aphelinidae

IMAGE NOT AVAILABLE

BIOUG22728-D02  
Eulophidae  
Family: Eulophidae

IMAGE NOT AVAILABLE

BIOUG22723-B09  
Eulophidae  
Family: Eulophidae

IMAGE NOT AVAILABLE

BIOUG22728-D11  
Tetrastichinae  
Family: Eulophidae

IMAGE NOT AVAILABLE

BIOUG22728-H04  
Eulophidae  
Family: Eulophidae

IMAGE NOT AVAILABLE

BIOUG22453-C08  
Eulophidae  
Family: Eulophidae

IMAGE NOT AVAILABLE

BIOUG22453-B10  
Eulophidae  
Family: Eulophidae

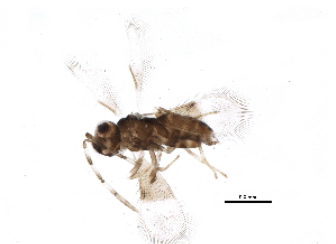

BIOUG07004-A03 [Lateral]  
Trichogrammatidae  
Family: Trichogrammatidae  
BIN URI: BOLD:ACL8560

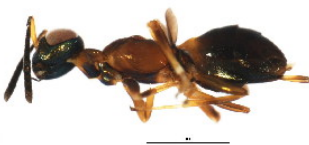

BIOUG01088-H01 [Lateral]  
Eupelmus vesicularis  
Family: Eupelmidae  
BIN URI: BOLD:AA8124

IMAGE NOT AVAILABLE

BIOUG22723-A08  
Trichogramma  
Family: Trichogrammatidae

IMAGE NOT AVAILABLE

BIOUG22927-D01  
Trichogramma  
Family: Trichogrammatidae

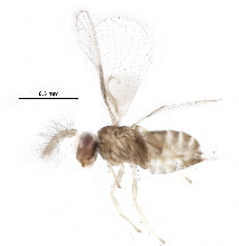

BIOUG21773-B03 [Lateral]  
Trichogrammatidae  
Family: Trichogrammatidae

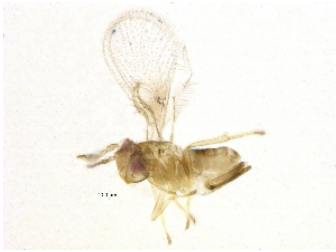

**BIOUG02984-C11 [Lateral]**  
Trichogramma platneri  
Family: Trichogrammatidae  
BIN URI: BOLD:AAE0242

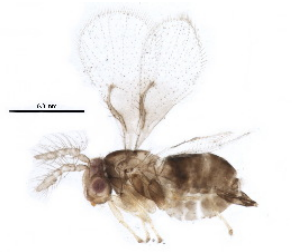

**BIOUG22469-B04 [Lateral]**  
Trichogramma  
Family: Trichogrammatidae  
BIN URI: BOLD:ACV4457

**IMAGE NOT AVAILABLE**

**IMAGE NOT AVAILABLE**

**BIOUG22727-C07**  
Trichogramma  
Family: Trichogrammatidae

**BIOUG23321-C04**  
Trichogramma  
Family: Trichogrammatidae

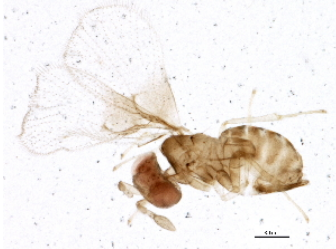

**BIOUG01657-B03 [Lateral]**  
Trichogramma  
Family: Trichogrammatidae  
BIN URI: BOLD:ABA5903

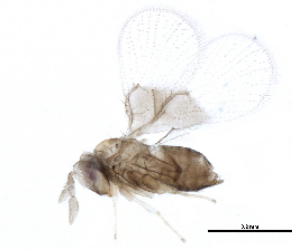

**BIOUG09812-E05 [Lateral]**  
Trichogrammatidae  
Family: Trichogrammatidae  
BIN URI: BOLD:ACK2239

**IMAGE NOT AVAILABLE**

**IMAGE NOT AVAILABLE**

**BIOUG22464-C11**  
Trichogrammatidae  
Family: Trichogrammatidae

**BIOUG23321-A09**  
Trichogrammatidae  
Family: Trichogrammatidae

**IMAGE NOT AVAILABLE**

**IMAGE NOT AVAILABLE**

**BIOUG22420-H04**  
Trichogrammatidae  
Family: Trichogrammatidae

**BIOUG22420-F08**  
Trichogrammatidae  
Family: Trichogrammatidae

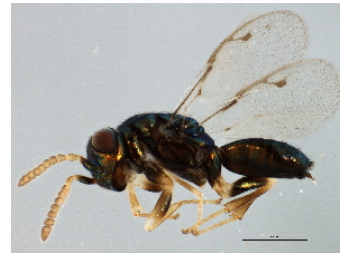

**BIOUG09889-G11 [Lateral]**  
Hymenoptera  
BIN URI: BOLD:ACL2194

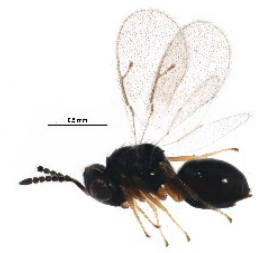

**BIOUG21773-A09 [Lateral]**  
Pteromalidae  
Family: Pteromalidae  
BIN URI: BOLD:AAU9270

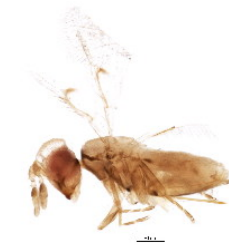

**BIOUG01757-D03 [Lateral]**  
Trichogrammatidae  
Family: Trichogrammatidae  
BIN URI: BOLD:ABV2811

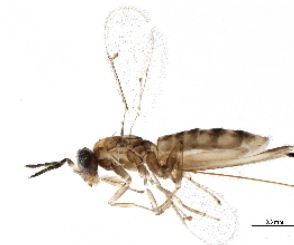

**BIOUG24012-B05 [Lateral]**  
Eulophidae  
Family: Eulophidae

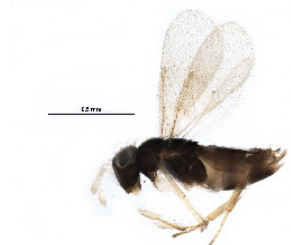

**BIOUG22421-E12 [Lateral]**  
Aphelinus  
Family: Aphelinidae  
BIN URI: BOLD:ABW3282

**IMAGE NOT AVAILABLE**

**BIOUG22931-F08**  
Aphelinus  
Family: Aphelinidae

**IMAGE NOT AVAILABLE**

**IMAGE NOT AVAILABLE**

**BIOUG22421-G03**  
Aphelinidae  
Family: Aphelinidae

**BIOUG22727-H08**  
Eulophidae  
Family: Eulophidae

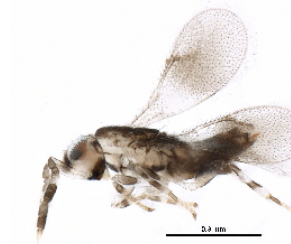

**BIOUG22458-G02 [Lateral]**  
Aphelinidae  
Family: Aphelinidae  
BIN URI: BOLD:ACF7754

**IMAGE NOT AVAILABLE**

**BIOUG23085-F04**  
Eulophidae  
Family: Eulophidae



IMAGE NOT AVAILABLE

BIOUG22626-D11  
Aphelinidae  
Family: Aphelinidae

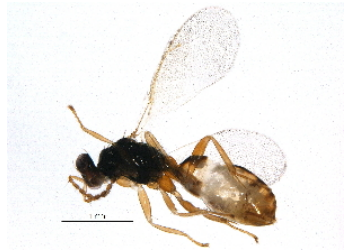

BIOUG02712-E09 [Lateral]  
Eulophidae  
Family: Eulophidae  
BIN URI: BOLD:ACO0513

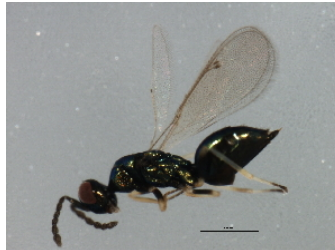

MTCHA-0047 [Lateral]  
Eulophinae  
Family: Eulophidae  
BIN URI: BOLD:AAG3134

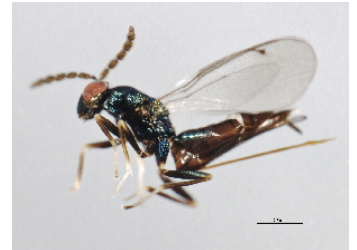

09BBEHY-0944 [Lateral]  
Eulophidae  
Family: Eulophidae  
BIN URI: BOLD:AAG8352

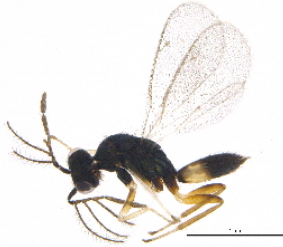

BIOUG21129-G05 [Lateral]  
Hymenoptera  
BIN URI: BOLD:ACU7524

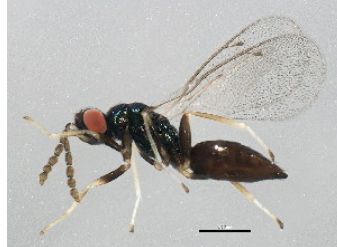

ASGLE-0941 [Lateral]  
Hymenoptera  
BIN URI: BOLD:AAU8693

IMAGE NOT AVAILABLE

BIOUG22420-G05  
Eulophidae  
Family: Eulophidae

IMAGE NOT AVAILABLE

BIOUG22931-F03  
Eulophidae  
Family: Eulophidae

IMAGE NOT AVAILABLE

BIOUG22294-D01  
Eulophidae  
Family: Eulophidae

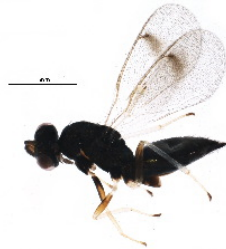

BIOUG22288-F09 [Lateral]  
Eulophidae  
Family: Eulophidae  
BIN URI: BOLD:ACP7579

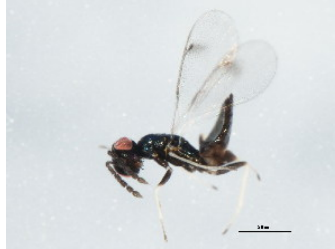

BIOUG00786-E06 [Lateral]  
Eulophidae  
Family: Eulophidae  
BIN URI: BOLD:AAV6809

IMAGE NOT AVAILABLE

BIOUG23188-B02  
Eulophidae  
Family: Eulophidae

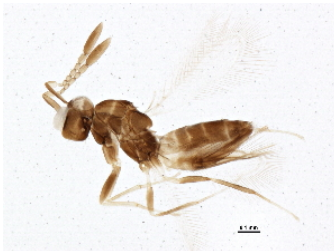

BIOUG01600-C04 [Lateral]  
Mymaridae  
Family: Mymaridae  
BIN URI: BOLD:ABW3132

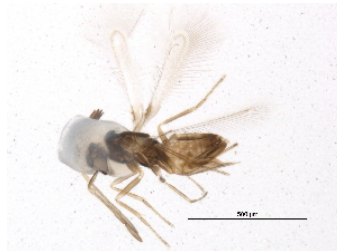

BIOUG04184-D07 [Lateral]  
Mymaridae  
Family: Mymaridae  
BIN URI: BOLD:ACD3100

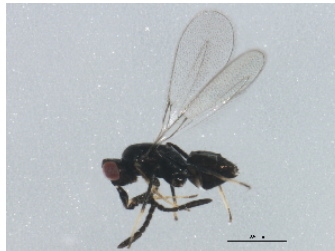

BIOUG01330-E07 [Lateral]  
Mymaridae  
Family: Mymaridae  
BIN URI: BOLD:ABV9378

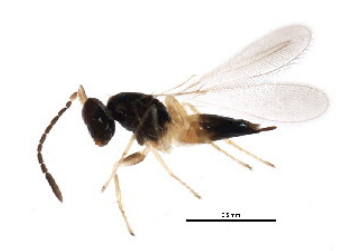

BIOUG01327-A05 [Lateral]  
Gonatocerus morrilli  
Family: Mymaridae  
BIN URI: BOLD:AAU9165

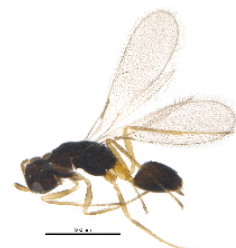

BIOUG21949-A04 [Lateral]  
Hymenoptera  
BIN URI: BOLD:ACU5155

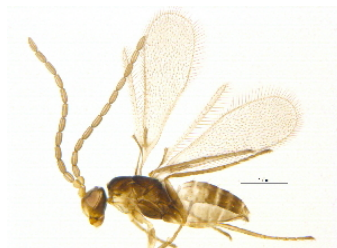

BIOUG03503-E01 [Lateral]  
Gonatocerus  
Family: Mymaridae  
BIN URI: BOLD:AAG1488

IMAGE NOT AVAILABLE

BIOUG23321-H06  
Gonatocerus  
Family: Mymaridae

IMAGE NOT AVAILABLE

BIOUG22238-C03  
Gonatocerus  
Family: Mymaridae

IMAGE NOT AVAILABLE

BIOUG22453-H02  
Anagrus  
Family: Mymaridae

IMAGE NOT AVAILABLE

BIOUG23321-B09  
Anagrus  
Family: Mymaridae

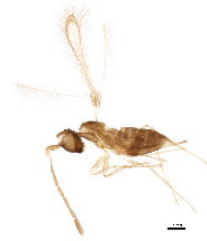

BIOUG01625-B03 [Lateral]  
Anagrus  
Family: Mymaridae  
BIN URI: BOLD:ABW3161

IMAGE NOT AVAILABLE

BIOUG22724-D05  
Anagrus  
Family: Mymaridae

IMAGE NOT AVAILABLE

BIOUG23320-F07  
Anagrus  
Family: Mymaridae

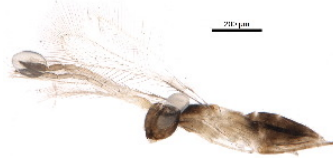

BIOUG22464-G08 [Lateral]  
Anagrus  
Family: Mymaridae  
BIN URI: BOLD:ACL7927

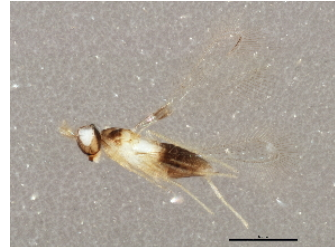

BIOUG03031-H07 [Lateral]  
Anagrus  
Family: Mymaridae  
BIN URI: BOLD:AAN8044

IMAGE NOT AVAILABLE

BIOUG22629-H10  
Anagrus  
Family: Mymaridae

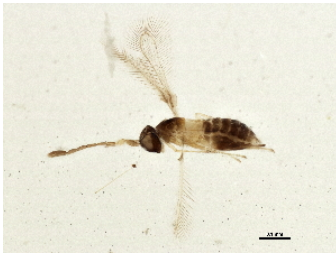

BIOUG03220-F11 [Lateral]  
Anagrus  
Family: Mymaridae  
BIN URI: BOLD:AAZ1968

IMAGE NOT AVAILABLE

IMAGE NOT AVAILABLE

IMAGE NOT AVAILABLE

BIOUG23074-D12  
Anagrus  
Family: Mymaridae

BIOUG22469-D07  
Anagrus  
Family: Mymaridae

BIOUG22723-H06  
Anagrus  
Family: Mymaridae

IMAGE NOT AVAILABLE

IMAGE NOT AVAILABLE

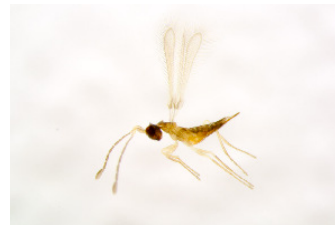

BC-ZSM-HYM-24151-E01 [adult]  
Anagrus  
Family: Mymaridae  
BIN URI: BOLD:AAU9004

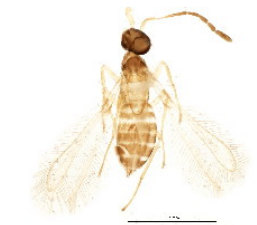

BIOUG01606-H07 [Dorsal]  
Anagrus  
Family: Mymaridae  
BIN URI: BOLD:ABV9379

BIOUG23085-B11  
Anagrus  
Family: Mymaridae

BIOUG23321-C02  
Anagrus  
Family: Mymaridae

IMAGE NOT AVAILABLE

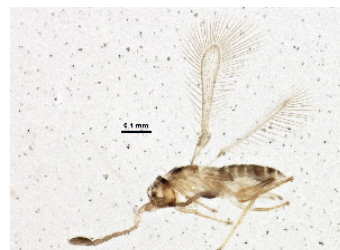

BIOUG03933-E10 [Lateral]  
Anagrus  
Family: Mymaridae  
BIN URI: BOLD:ABV2812

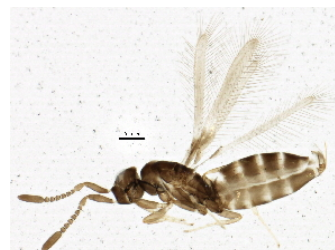

BIOUG03262-A04 [Lateral]  
Mymaridae  
Family: Mymaridae  
BIN URI: BOLD:ACC8034

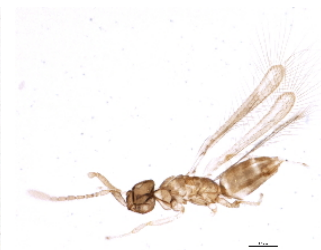

BIOUG06003-F01 [Lateral]  
Mymaridae  
Family: Mymaridae  
BIN URI: BOLD:ACI4516

BIOUG23320-G10  
Anagrus  
Family: Mymaridae

IMAGE NOT AVAILABLE

BIOUG22294-G04  
Anaphes  
Family: Mymaridae

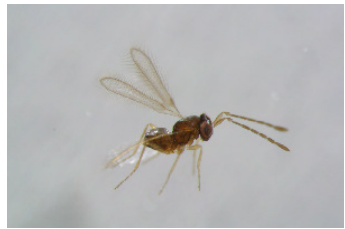

BC-ZSM-HYM-24152-E01 [adult]  
Anaphes  
Family: Mymaridae  
BIN URI: BOLD:AAZ0173

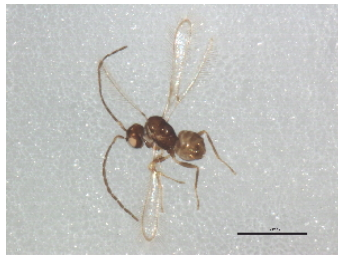

BIOUG01443-B01 [Lateral]  
Anaphes anaphes listronoti  
Family: Mymaridae  
BIN URI: BOLD:ACE9773

IMAGE NOT AVAILABLE

BIOUG22931-F09  
Anaphes  
Family: Mymaridae

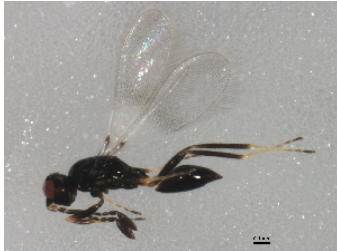

BIOUG01330-A03 [Lateral]  
Mymaridae  
Family: Mymaridae  
BIN URI: BOLD:ABW3294

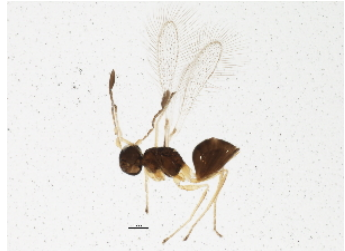

BIOUG03904-C02 [Lateral]  
Mymaridae  
Family: Mymaridae  
BIN URI: BOLD:ACB6947

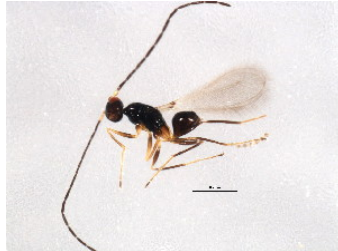

BIOUG00826-G01 [Lateral]  
Mymaridae  
Family: Mymaridae  
BIN URI: BOLD:ABA9151

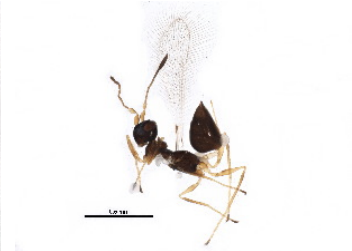

BIOUG22931-G03 [Lateral]  
Polynema  
Family: Mymaridae  
BIN URI: BOLD:ACB1682

IMAGE NOT AVAILABLE

BIOUG22420-F06  
Mymaridae  
Family: Mymaridae

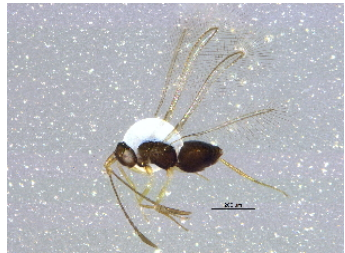

BIOUG03979-H05 [Lateral]  
Mymaridae  
Family: Mymaridae  
BIN URI: BOLD:ABW3187

IMAGE NOT AVAILABLE

BIOUG22724-H08  
Mymaridae  
Family: Mymaridae

IMAGE NOT AVAILABLE

BIOUG23085-E05  
Pteromalidae  
Family: Pteromalidae

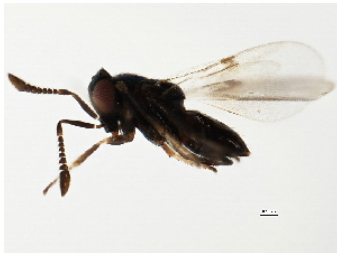

BIOUG00836-G08 [Lateral]  
Copidosoma floridanum  
Family: Encyrtidae  
BIN URI: BOLD:AAA7203

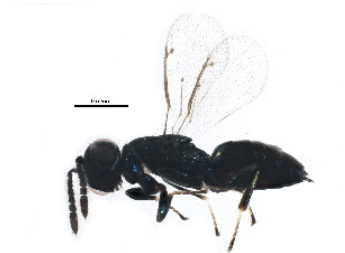

BIOUG15004-F06 [Lateral]  
Hymenoptera  
BIN URI: BOLD:ACV3936

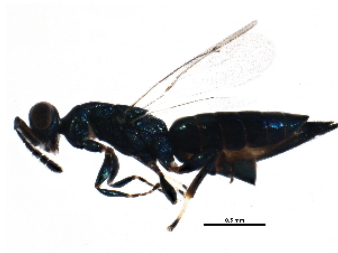

BIOUG24037-C06 [Lateral]  
Eulophidae  
Family: Eulophidae

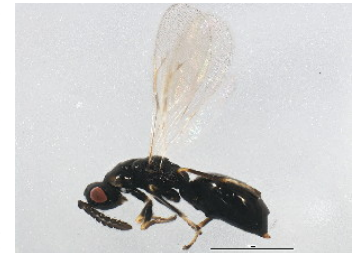

ASGLE-0546 [Lateral]  
Hymenoptera  
BIN URI: BOLD:AAU8477

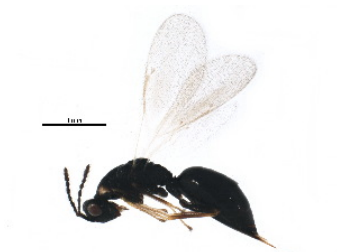

BIOUG22421-C09 [Lateral]  
Eurytomidae  
Family: Eurytomidae  
BIN URI: BOLD:ABW3307

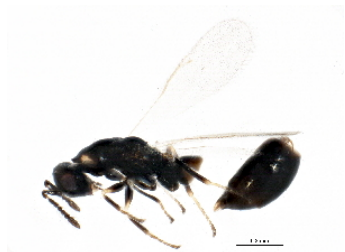

BIOUG22458-E02 [Lateral]  
Eurytomidae  
Family: Eurytomidae  
BIN URI: BOLD:ACK5466

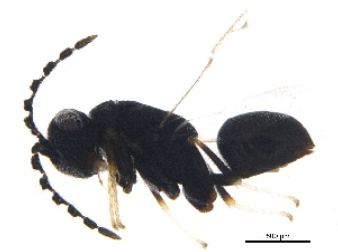

BIOUG22578-A02 [Lateral]  
Eurytomidae  
Family: Eurytomidae  
BIN URI: BOLD:ACV3443

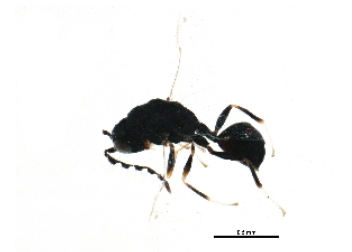

BIOUG22927-A11 [Lateral]  
Eurytomidae  
Family: Eurytomidae  
BIN URI: BOLD:ACV5920

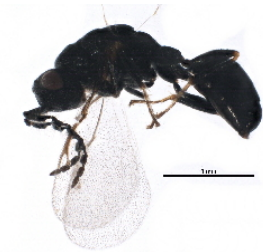

**BIOUG24011-B10 [Lateral]**  
Eurytominae  
Family: Eurytomidae

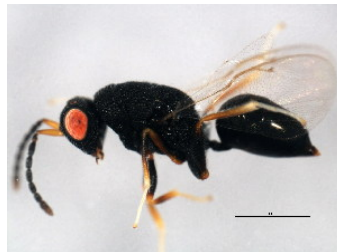

**BIOUG00826-E05 [Lateral]**  
Eurytomidae  
Family: Eurytomidae  
BIN URI: BOLD:ABA9155

**IMAGE NOT AVAILABLE**

**BIOUG22870-E12**  
Eurytomidae  
Family: Eurytomidae

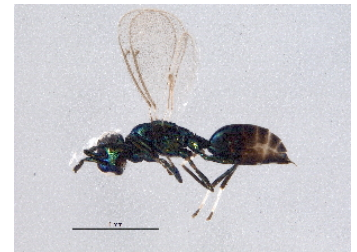

**BIOUG05211-D03 [Lateral]**  
Eulophidae  
Family: Eulophidae  
BIN URI: BOLD:AAU9425

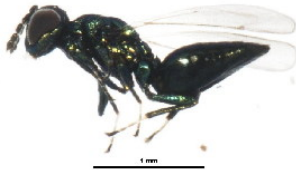

**BIOUG01031-B03 [Lateral]**  
Entedoninae  
Family: Eulophidae  
BIN URI: BOLD:ABA6003

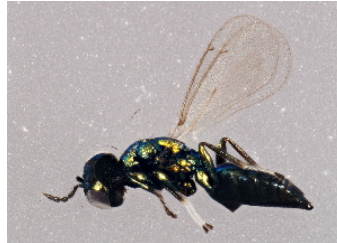

**BIOUG03594-D04 [Lateral]**  
Entedon  
Family: Eulophidae  
BIN URI: BOLD:ABW3259

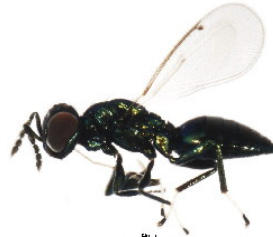

**BIOUG01037-H02 [Lateral]**  
Entedoninae  
Family: Eulophidae  
BIN URI: BOLD:ABA5969

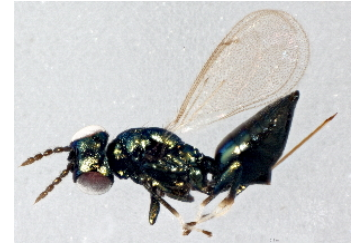

**BIOUG01692-D11 [Lateral]**  
Eulophidae  
Family: Eulophidae  
BIN URI: BOLD:ACK3527

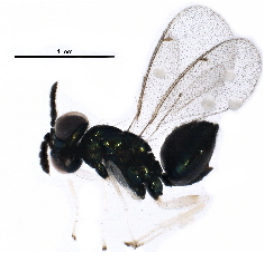

**BIOUG24008-H08 [Lateral]**  
Eulophidae  
Family: Eulophidae

**IMAGE NOT AVAILABLE**

**BIOUG23074-A04**  
Eulophidae  
Family: Eulophidae

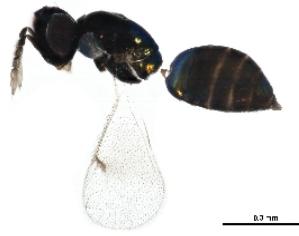

**BIOUG24008-H11 [Lateral]**  
Eulophidae  
Family: Eulophidae

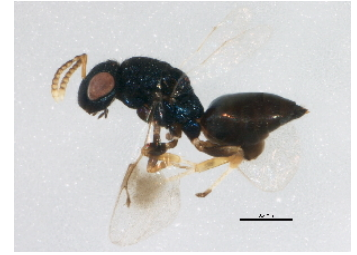

**BIOUG01443-H06 [Lateral]**  
Pteromalidae  
Family: Pteromalidae  
BIN URI: BOLD:ABA6057

**IMAGE NOT AVAILABLE**

**BIOUG21892-B07**  
Pteromalidae  
Family: Pteromalidae

**IMAGE NOT AVAILABLE**

**BIOUG22458-E09**  
Pteromalidae  
Family: Pteromalidae

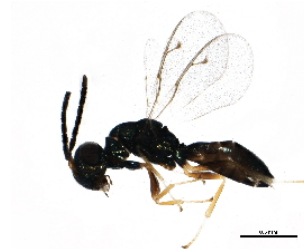

**BIOUG21892-A09 [Lateral]**  
Pteromalidae  
Family: Pteromalidae

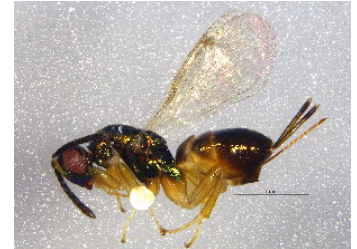

**BIOUG03979-E04 [Lateral]**  
Torymidae  
Family: Torymidae  
BIN URI: BOLD:ACC1454

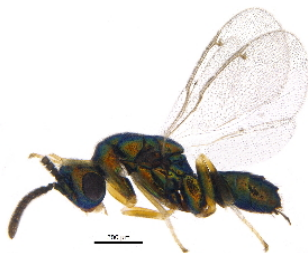

**BIOUG22238-C09 [Lateral]**  
Torymus  
Family: Torymidae  
BIN URI: BOLD:ACV2473

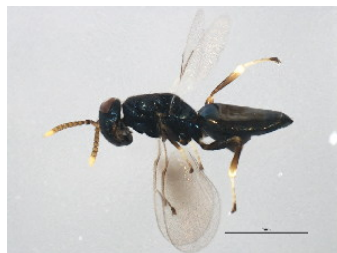

**ASGLE-0552 [Lateral]**  
Hymenoptera  
BIN URI: BOLD:AAU8478

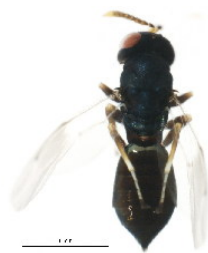

**BIOUG01284-D10 [Dorsal]**  
Encyrtidae  
Family: Encyrtidae  
BIN URI: BOLD:ABA9126

**IMAGE NOT AVAILABLE**

**BIOUG23085-G11**  
Encyrtidae  
Family: Encyrtidae

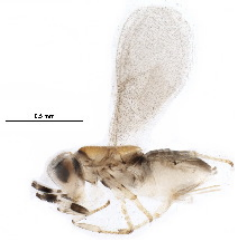

**BIOUG22626-C01 [Lateral]**  
Encyrtidae  
Family: Encyrtidae  
BIN URI: BOLD:ACV5102

IMAGE NOT AVAILABLE

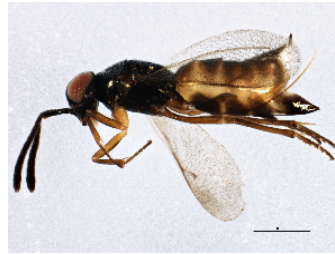

**BIOUG01309-B11 [Lateral]**  
Mymaridae  
Family: Mymaridae  
BIN URI: BOLD:ABX2601

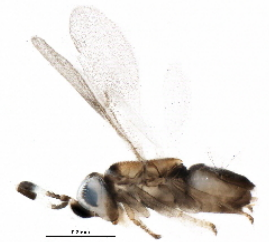

**BIOUG22458-G03 [Lateral]**  
Encyrtidae  
Family: Encyrtidae  
BIN URI: BOLD:ACV3546

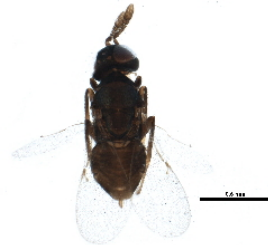

**BIOUG08612-B09 [Dorsal]**  
Hymenoptera  
BIN URI: BOLD:ACK1743

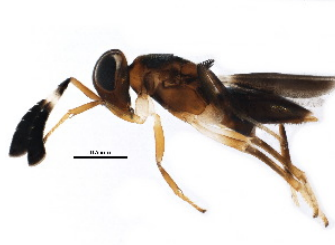

**BIOUG22723-H11 [Lateral]**  
Trichogrammatidae  
Family: Trichogrammatidae  
BIN URI: BOLD:ACV4980

IMAGE NOT AVAILABLE

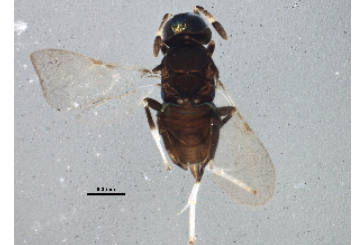

**BIOUG09249-B05 [Dorsal]**  
Hymenoptera  
BIN URI: BOLD:ACL0141

IMAGE NOT AVAILABLE

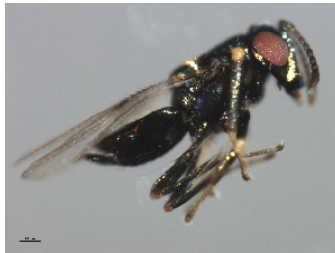

**08BBHYM-1058 [Lateral]**  
Encyrtidae  
Family: Encyrtidae  
BIN URI: BOLD:AAG7879

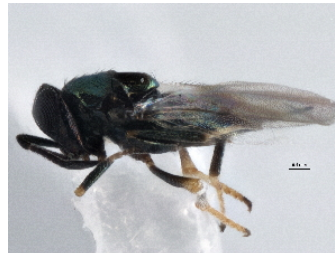

**BIOUG08726-D07 [Lateral]**  
Hymenoptera  
BIN URI: BOLD:ACI4933

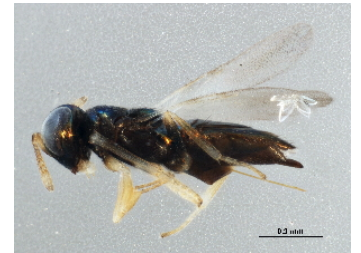

**BIOUG09005-G10 [Lateral]**  
Encyrtidae  
Family: Encyrtidae  
BIN URI: BOLD:ACK5989

**BIOUG22931-H07**  
Encyrtidae  
Family: Encyrtidae

IMAGE NOT AVAILABLE

IMAGE NOT AVAILABLE

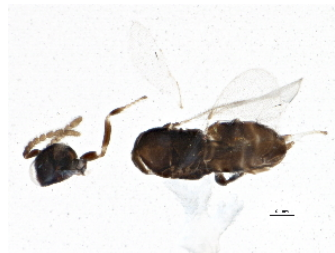

**BIOUG04245-D09 [Lateral]**  
Hymenoptera  
BIN URI: BOLD:ACD0871

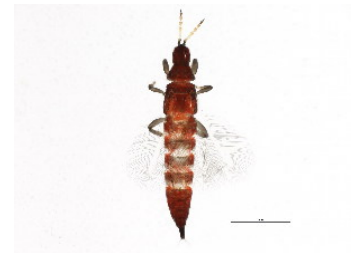

**BIOUG04093-A03 [Dorsal]**  
Haplotrips  
Family: Phlaeothripidae  
BIN URI: BOLD:AAG2812

**BIOUG23085-A10**  
Encyrtidae  
Family: Encyrtidae

**BIOUG22458-E12**  
Trichogrammatidae  
Family: Trichogrammatidae

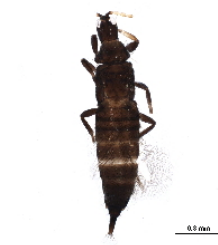

**BIOUG09310-A11 [Dorsal]**  
Haplotrips verbasci  
Family: Phlaeothripidae  
BIN URI: BOLD:AAI6861

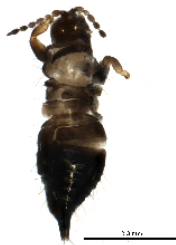

**BIOUG24001-C12 [Dorsal]**  
Thysanoptera

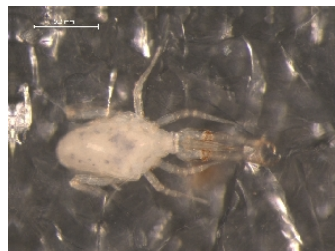

**BIOUG05520-E03 [Lateral]**  
Cunaxidae  
Family: Cunaxidae  
BIN URI: BOLD:ACF7081

IMAGE NOT AVAILABLE

**BIOUG22841-F07**  
Cunaxidae  
Family: Cunaxidae

IMAGE NOT AVAILABLE

BIOUG22846-F07  
Stigmaeidae  
Family: Stigmaeidae  
BIN URI: BOLD:ACV9372

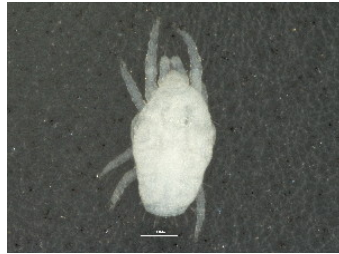

BIOUG03211-H04 [Dorsal]  
Stigmaeidae  
Family: Stigmaeidae  
BIN URI: BOLD:ACC8365

IMAGE NOT AVAILABLE

BIOUG08405-G08  
Stigmaeidae  
Family: Stigmaeidae  
BIN URI: BOLD:ACK3900

IMAGE NOT AVAILABLE

BIOUG24030-F11  
Trombidiformes

IMAGE NOT AVAILABLE

BIOUG24030-F09  
Tarsonemidae  
Family: Tarsonemidae

IMAGE NOT AVAILABLE

BIOUG24030-G09  
Tarsonemidae  
Family: Tarsonemidae

IMAGE NOT AVAILABLE

BIOUG24005-E07  
Tarsonemidae  
Family: Tarsonemidae

IMAGE NOT AVAILABLE

BIOUG24030-B05  
Tarsonemidae  
Family: Tarsonemidae

IMAGE NOT AVAILABLE

BIOUG21886-F12  
Trombidiformes  
BIN URI: BOLD:ACV5754

IMAGE NOT AVAILABLE

BIOUG24030-G06  
Tarsonemidae  
Family: Tarsonemidae

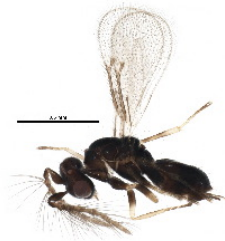

BIOUG20971-B07 [Lateral]  
Hymenoptera

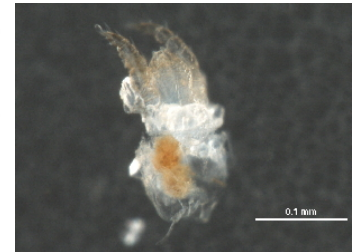

BIOUG19921-E09 [Dorsal]  
Arachnida  
BIN URI: BOLD:ACT7872

IMAGE NOT AVAILABLE

BIOUG24030-F07  
Trombidiformes

IMAGE NOT AVAILABLE

BIOUG21884-H06  
Trombidiformes  
BIN URI: BOLD:ACV5529

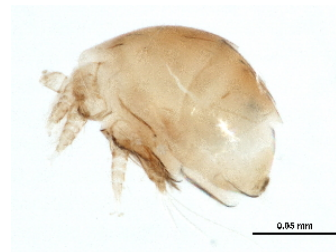

BIOUG21882-E03 [Lateral]  
Scutacaridae  
Family: Scutacaridae  
BIN URI: BOLD:ACR0181

IMAGE NOT AVAILABLE

BIOUG24030-G01  
Trombidiformes

IMAGE NOT AVAILABLE

BIOUG21899-A04  
Scutacaridae  
Family: Scutacaridae  
BIN URI: BOLD:ACV5391

IMAGE NOT AVAILABLE

BIOUG21899-A02  
Trombidiformes  
BIN URI: BOLD:ACV5489

IMAGE NOT AVAILABLE

BIOUG21897-F12  
Scutacaridae  
Family: Scutacaridae  
BIN URI: BOLD:ACV5617

IMAGE NOT AVAILABLE

BIOUG24030-B09  
Trombidiformes

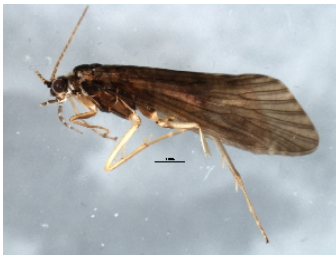

**07ELEPT-112 [Lateral]**  
*Cheumatopsyche analis*  
 Family: Hydropsychidae  
 BIN URI: BOLD:AAA5695

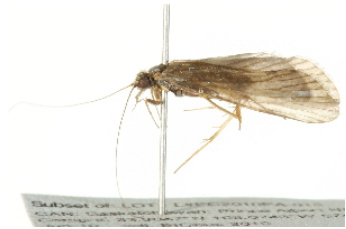

**BIOUG00839-F05 [Lateral]**  
*Cheumatopsyche campyla*  
 Family: Hydropsychidae  
 BIN URI: BOLD:AAA3892

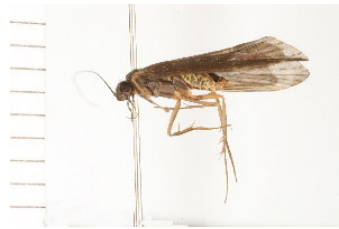

**08NBEP-0639 [Lateral]**  
*Cheumatopsyche ela*  
 Family: Hydropsychidae  
 BIN URI: BOLD:ACE5263

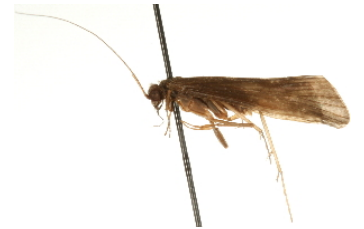

**09CBCAD-329 [Lateral]**  
*Hydropsyche spama*  
 Family: Hydropsychidae  
 BIN URI: BOLD:AAA2528

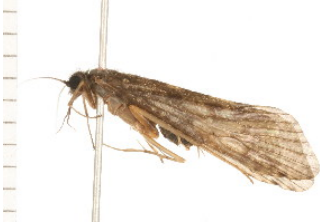

**08NBEP-0497 [Lateral]**  
*Hydropsyche bronta*  
 Family: Hydropsychidae  
 BIN URI: BOLD:ACW3105

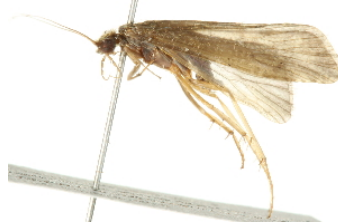

**BIOUG00839-F06 [Lateral]**  
*Ceratopsyche morosa*  
 Family: Hydropsychidae  
 BIN URI: BOLD:AAA3679

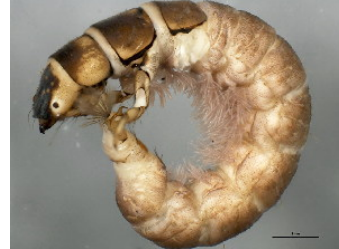

**FormTOexpt146 [Lateral]**  
*Hydropsyche morosa*  
 Family: Hydropsychidae  
 BIN URI: BOLD:AAA3680

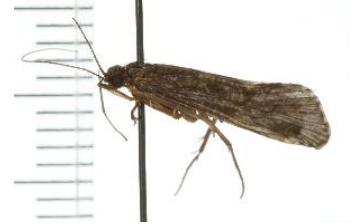

**07ONCAD-0126 [Lateral]**  
*Hydropsyche betteni*  
 Family: Hydropsychidae  
 BIN URI: BOLD:AAA1669

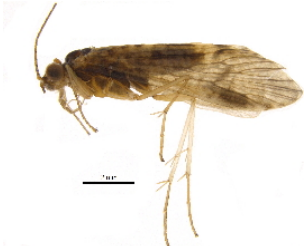

**BIOUG22866-H08 [Lateral]**  
*Hydropsyche phalerata*  
 Family: Hydropsychidae  
 BIN URI: BOLD:AAC3243

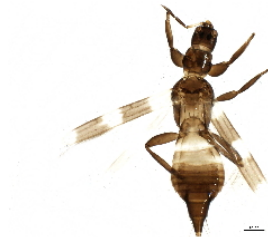

**BIOUG02751-F04 [Dorsal]**  
*Aeolothrips*  
 Family: Aeolothripidae  
 BIN URI: BOLD:AAU0577

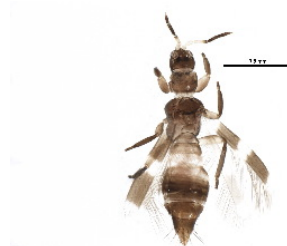

**BIOUG19863-E09 [Dorsal]**  
*Aeolothrips ericae*  
 Family: Aeolothripidae  
 BIN URI: BOLD:ABA2981

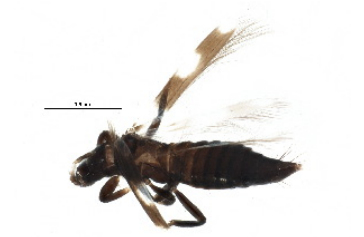

**BIOUG11035-A03 [Lateral]**  
 Aeolothripidae  
 Family: Aeolothripidae  
 BIN URI: BOLD:ACM1798

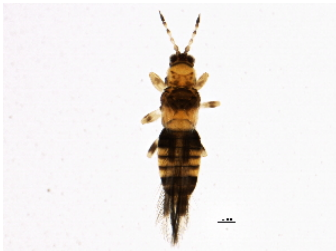

**BIOUG03932-E02 [Dorsal]**  
 Thripidae  
 Family: Thripidae  
 BIN URI: BOLD:ACN8291

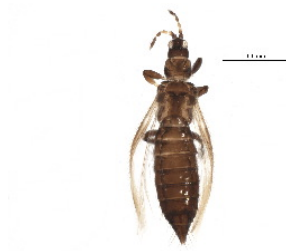

**BIOUG08879-D11 [Dorsal]**  
*Taeniothrips inconsequens*  
 Family: Thripidae  
 BIN URI: BOLD:ACC0651

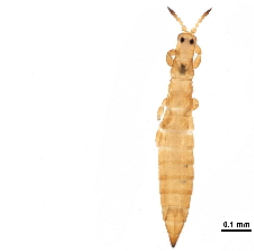

**BIOUG21887-F09 [Dorsal]**  
*Aptinothrips*  
 Family: Thripidae  
 BIN URI: BOLD:AAU0618

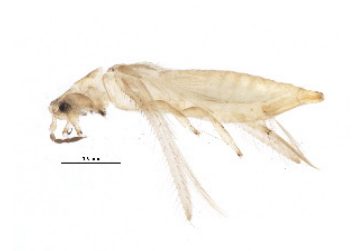

**BIOUG11434-F09 [Lateral]**  
 Thripidae  
 Family: Thripidae  
 BIN URI: BOLD:AAM7854

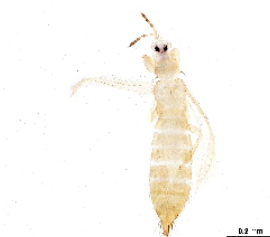

**BIOUG03880-H07 [Dorsal]**  
 Thripidae  
 Family: Thripidae  
 BIN URI: BOLD:ACD5332

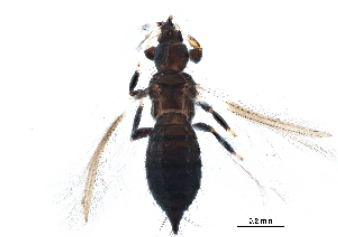

**BIOUG10662-G12 [Dorsal]**  
*Odontothrips biuncus*  
 Family: Thripidae  
 BIN URI: BOLD:AAN5715

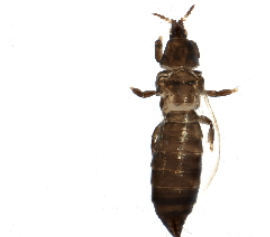

**BIOUG24029-D03 [Dorsal]**  
*Chirothrips manicatus*  
 Family: Thripidae

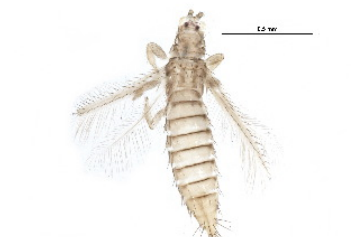

**BIOUG22288-D09 [Dorsal]**  
 Thripidae  
 Family: Thripidae  
 BIN URI: BOLD:ACV3023

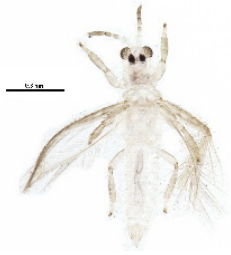

IMAGE NOT AVAILABLE

**BIOUG22575-C06 [Dorsal]**  
Scirtothrips  
Family: Thripidae  
BIN URI: BOLD:ACV3625

**BIOUG22354-G03**  
Scirtothrips  
Family: Thripidae  
BIN URI: BOLD:ACV4056

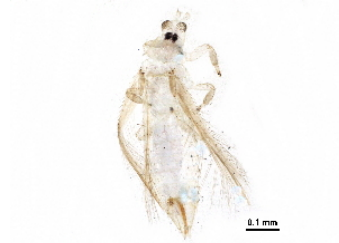

**BIOUG22575-C09 [Dorsal]**  
Thripidae  
Family: Thripidae  
BIN URI: BOLD:ACV4199

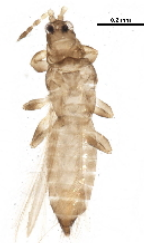

**BIOUG08754-F12 [Dorsal]**  
Thripidae  
Family: Thripidae  
BIN URI: BOLD:ABW5634

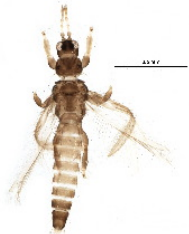

**BIOUG04339-F02 [Dorsal]**  
Thrips physapus  
Family: Thripidae  
BIN URI: BOLD:AA9105

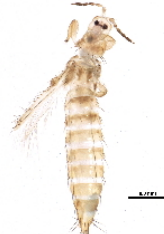

**BIOUG13478-F03 [Dorsal]**  
Anaphothrips obscurus  
Family: Thripidae  
BIN URI: BOLD:AAD4600

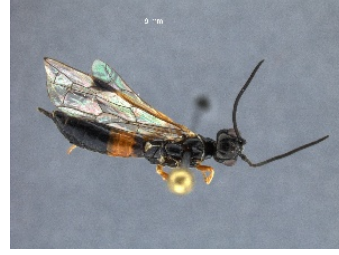

**WSSF98 [Dorsal]**  
Janus integer  
Family: Cephidae  
BIN URI: BOLD:AAD8205

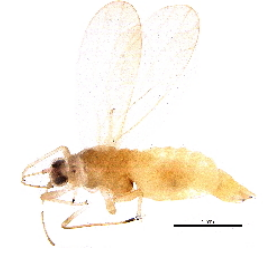

**BIOUG19924-E08 [Lateral]**  
Psyllidae  
Family: Psyllidae  
BIN URI: BOLD:ACT4553

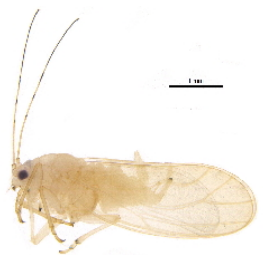

**BIOUG22874-H11 [Lateral]**  
Psyllidae  
Family: Psyllidae  
BIN URI: BOLD:ACV4988

IMAGE NOT AVAILABLE

**BIOUG21881-G04**  
Psyllidae  
Family: Psyllidae

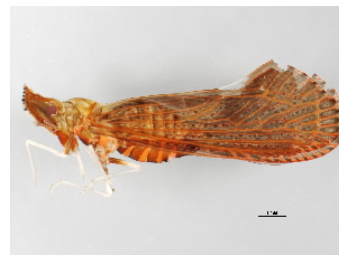

**09BBEHE-057 [Lateral]**  
Otiocerus degeerii  
Family: Derbidae  
BIN URI: BOLD:AAG8977

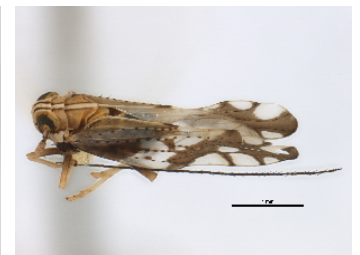

**CNC#HEM405902 [Lateral]**  
Liburniella ornata  
Family: Delphacidae  
BIN URI: BOLD:AA8272

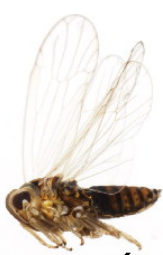

**BIOUG01012-C07 [Lateral]**  
Muirodelphax atralabis  
Family: Delphacidae  
BIN URI: BOLD:AAC3517

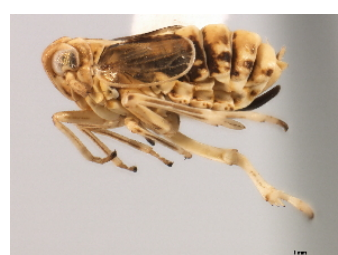

**CNC#HEM405939 [Lateral]**  
Delphacodes kilmani  
Family: Delphacidae  
BIN URI: BOLD:AAV0160

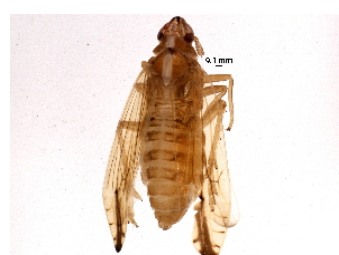

**BIOUG07904-E03 [Dorsal]**  
Delphacidae  
Family: Delphacidae  
BIN URI: BOLD:ACJ0257

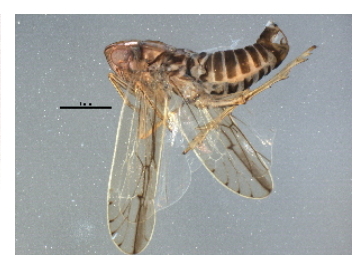

**BIOUG13544-H05 [Lateral]**  
Delphacidae  
Family: Delphacidae  
BIN URI: BOLD:ACO0772

IMAGE NOT AVAILABLE

**BIOUG08101-C12**  
Eupodidae  
Family: Eupodidae  
BIN URI: BOLD:ACI9912

IMAGE NOT AVAILABLE

**BIOUG20568-H04**  
Eupodidae  
Family: Eupodidae  
BIN URI: BOLD:ACV5502

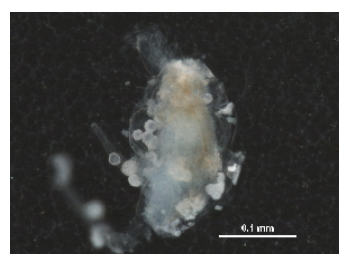

**BIOUG22864-B01 [Dorsal]**  
Eupodes  
Family: Eupodidae  
BIN URI: BOLD:AA08147

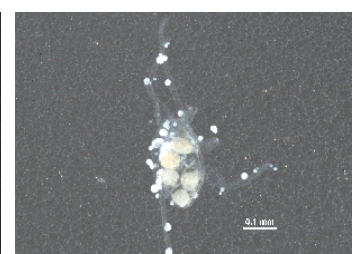

**BIOUG22864-D03 [Dorsal]**  
Eupodidae  
Family: Eupodidae  
BIN URI: BOLD:ACN0389



IMAGE NOT AVAILABLE

BIOUG21897-A04  
Eupodidae  
Family: Eupodidae  
BIN URI: BOLD:ACV5409

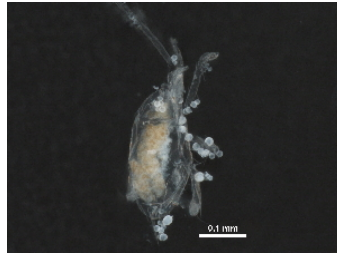

BIOUG22864-A07 [Dorsal]  
Eupodidae  
Family: Eupodidae  
BIN URI: BOLD:ACV5912

IMAGE NOT AVAILABLE

BIOUG24030-D08  
Eupodidae  
Family: Eupodidae

IMAGE NOT AVAILABLE

BIOUG24030-C02  
Eupodidae  
Family: Eupodidae

IMAGE NOT AVAILABLE

BIOUG21884-H01  
Eupodidae  
Family: Eupodidae  
BIN URI: BOLD:ACV5335

IMAGE NOT AVAILABLE

BIOUG24030-D01  
Pachygnathidae  
Family: Pachygnathidae

IMAGE NOT AVAILABLE

BIOUG21886-F01  
Trombidiformes  
BIN URI: BOLD:ACV5687

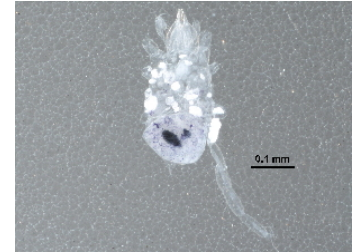

BIOUG22631-C04 [Dorsal]  
Rhagidiidae  
Family: Rhagidiidae  
BIN URI: BOLD:ACV5446

IMAGE NOT AVAILABLE

BIOUG21899-D03  
Rhagidiidae  
Family: Rhagidiidae  
BIN URI: BOLD:ACV4973

IMAGE NOT AVAILABLE

BIOUG21882-C12  
Rhagidiidae  
Family: Rhagidiidae  
BIN URI: BOLD:ACV7504

IMAGE NOT AVAILABLE

BIOUG24000-H08  
Rhagidiidae  
Family: Rhagidiidae

IMAGE NOT AVAILABLE

BIOUG21886-C05  
Tydeidae  
Family: Tydeidae  
BIN URI: BOLD:ACV5866

IMAGE NOT AVAILABLE

BIOUG21886-F06  
Tydeidae  
Family: Tydeidae  
BIN URI: BOLD:ACV5008

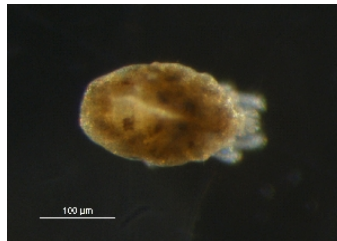

BIOUG01179-41 [Dorsal]  
Tydeidae  
Family: Tydeidae  
BIN URI: BOLD:ABV1817

IMAGE NOT AVAILABLE

BIOUG21897-E01  
Tydeidae  
Family: Tydeidae  
BIN URI: BOLD:ACV5486

IMAGE NOT AVAILABLE

BIOUG21882-E07  
Tydeidae  
Family: Tydeidae  
BIN URI: BOLD:ACV6451

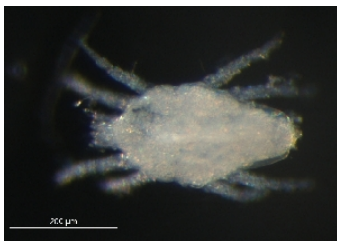

BIOUG05554-B12 [Lateral]  
Tydeidae  
Family: Tydeidae  
BIN URI: BOLD:AAH3904

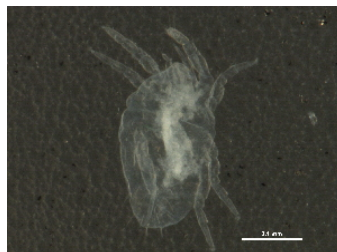

BIOUG09351-E03 [Dorsal]  
Arachnida  
BIN URI: BOLD:ACI9974

IMAGE NOT AVAILABLE

BIOUG21897-B12  
Tydeidae  
Family: Tydeidae  
BIN URI: BOLD:ACV4849

IMAGE NOT AVAILABLE

BIOUG21897-D05  
Tydeidae  
Family: Tydeidae  
BIN URI: BOLD:ACV4895

IMAGE NOT AVAILABLE

BIOUG21899-C08  
Tydeidae  
Family: Tydeidae  
BIN URI: BOLD:ACV5527

IMAGE NOT AVAILABLE

BIOUG24000-G02  
Eupodidae  
Family: Eupodidae

IMAGE NOT AVAILABLE

BIOUG20921-F12  
Arachnida  
BIN URI: BOLD:ACV5532

IMAGE NOT AVAILABLE

BIOUG21897-C09  
Eupodidae  
Family: Eupodidae  
BIN URI: BOLD:ACV4932

IMAGE NOT AVAILABLE

BIOUG08057-F07  
Eupodidae  
Family: Eupodidae  
BIN URI: BOLD:ACB5424

IMAGE NOT AVAILABLE

BIOUG21882-C04  
Eupodidae  
Family: Eupodidae  
BIN URI: BOLD:ACV8844

IMAGE NOT AVAILABLE

BIOUG24030-D02  
Eupodidae  
Family: Eupodidae

IMAGE NOT AVAILABLE

BIOUG24000-E07  
Eupodidae  
Family: Eupodidae

IMAGE NOT AVAILABLE

BIOUG24030-E07  
Eupodidae  
Family: Eupodidae

IMAGE NOT AVAILABLE

BIOUG08057-D02  
Eupodidae  
Family: Eupodidae  
BIN URI: BOLD:ACI9910

IMAGE NOT AVAILABLE

BIOUG16633-G07  
Eupodidae  
Family: Eupodidae  
BIN URI: BOLD:ACQ9955

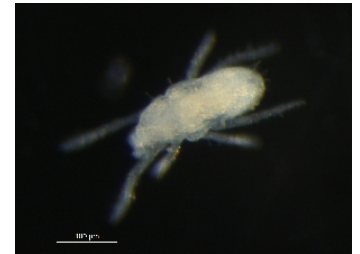

BIOUG01189-84 [Dorsal]  
Trombidiformes

BIN URI: BOLD:ABV1844

IMAGE NOT AVAILABLE

BIOUG21899-D11  
Trombidiformes  
BIN URI: BOLD:ACV5697

IMAGE NOT AVAILABLE

BIOUG21774-F04  
Trombidiformes

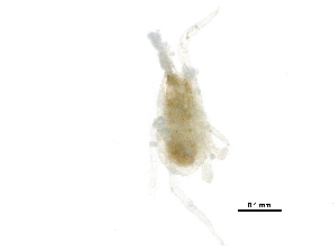

BIOUG14833-H11 [Lateral]  
Arachnida

BIN URI: BOLD:ACI2899

IMAGE NOT AVAILABLE

BIOUG21773-G07  
Bdellidae  
Family: Bdellidae  
BIN URI: BOLD:ACV2258

IMAGE NOT AVAILABLE

BIOUG22837-C05  
Trombidiformes  
BIN URI: BOLD:ACV9532

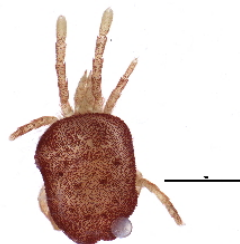

BIOUG14250-F10 [Dorsal]  
Arachnida

BIN URI: BOLD:ACL1896

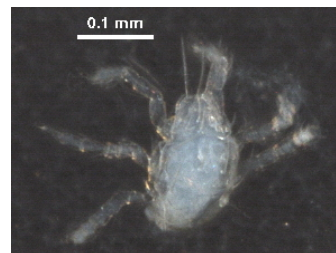

BIOUG24005-A06 [Dorsal]  
Trombidiformes

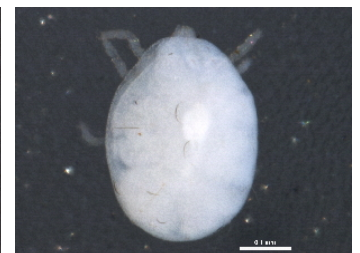

BIOUG03765-B07 [Dorsal]  
Microtrombididae  
Family: Microtrombididae  
BIN URI: BOLD:ABW5666

IMAGE NOT AVAILABLE

BIOUG23322-G02  
Microtrombiidae  
Family: Microtrombiidae  
BIN URI: BOLD:ACW0840

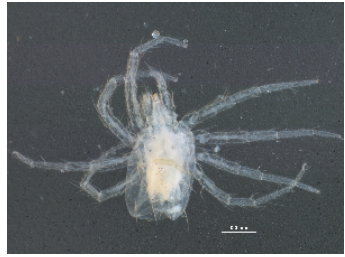

BIOUG06849-E09 [Dorsal]  
Anystidae  
Family: Anystidae  
BIN URI: BOLD:ACJ1181

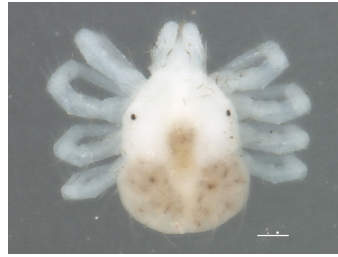

BIOUG01238-B08 [Dorsal]  
Anystidae  
Family: Anystidae  
BIN URI: BOLD:ABY2067

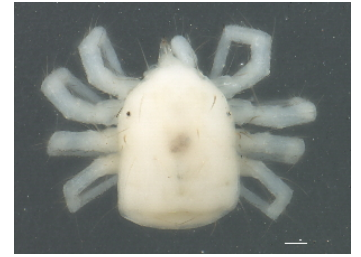

BIOUG01238-H09 [Dorsal]  
Anystidae  
Family: Anystidae  
BIN URI: BOLD:AAM7961

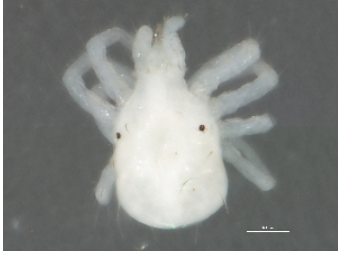

BIOUG01238-E09 [Dorsal]  
Anystidae  
Family: Anystidae  
BIN URI: BOLD:ABW2639

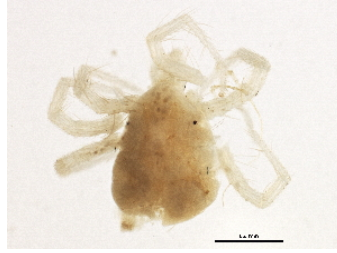

BIOUG04156-E10 [Dorsal]  
Anystidae  
Family: Anystidae  
BIN URI: BOLD:AAF9236

IMAGE NOT AVAILABLE

BIOUG22931-D07  
Anystidae  
Family: Anystidae

IMAGE NOT AVAILABLE

BIOUG22632-F10  
Sarcoptiformes  
BIN URI: BOLD:ACV5927

IMAGE NOT AVAILABLE

BIOUG22630-H10  
Sarcoptiformes  
BIN URI: BOLD:ACV5101

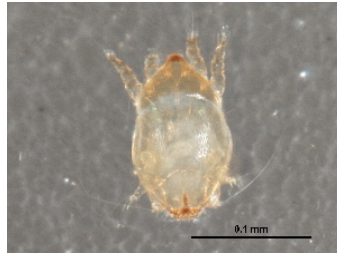

BIOUG23322-F12 [Dorsal]  
Sarcoptiformes  
BIN URI: BOLD:ACW1176

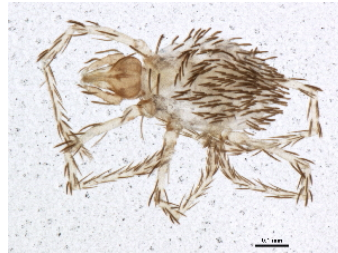

BIOUG01876-B09 [Dorsal]  
Leptus  
Family: Erythraeidae  
BIN URI: BOLD:ABW2638

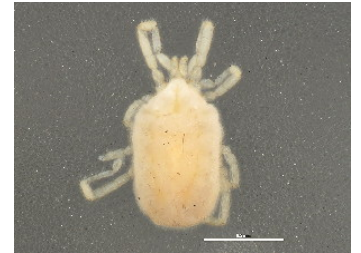

BIOUG02050-H09 [Dorsal]  
Erythraeidae  
Family: Erythraeidae  
BIN URI: BOLD:AAH6614

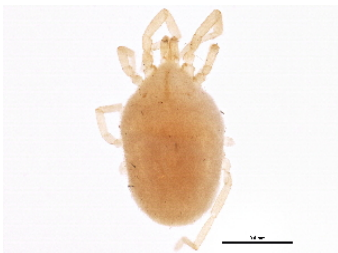

BIOUG04693-B01 [Dorsal]  
Erythraeidae  
Family: Erythraeidae  
BIN URI: BOLD:ABW2691

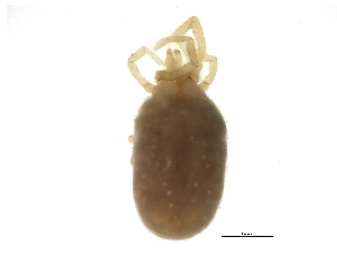

BIOUG01238-F05 [Dorsal]  
Erythraeidae  
Family: Erythraeidae  
BIN URI: BOLD:AAH6489

IMAGE NOT AVAILABLE

BIOUG22279-D08  
Hygrobatidae  
Family: Hygrobatidae  
BIN URI: BOLD:ACV2582

IMAGE NOT AVAILABLE

BIOUG22321-E04  
Hygrobatidae  
Family: Hygrobatidae

IMAGE NOT AVAILABLE

BIOUG22323-A01  
Hygrobatidae  
Family: Hygrobatidae

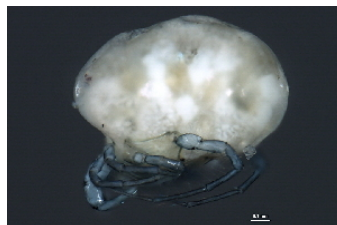

CNC-IMS090088.101 [Lateral]  
Limnesia sp0988B  
Family: Limnesiidae  
BIN URI: BOLD:AAE6458

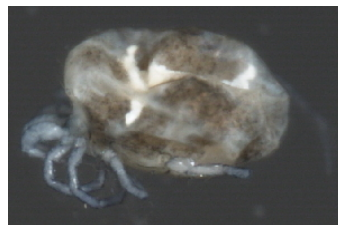

CNC-IMS090050.004 [Lateral]  
Limnesia sp0950A  
Family: Limnesiidae  
BIN URI: BOLD:AAE6450

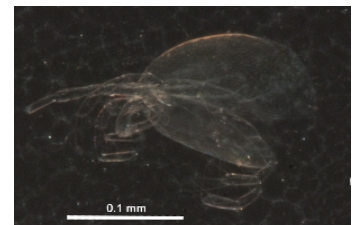

BIOUG21001-F12 [Lateral]  
Arachnida  
BIN URI: BOLD:ACU5009

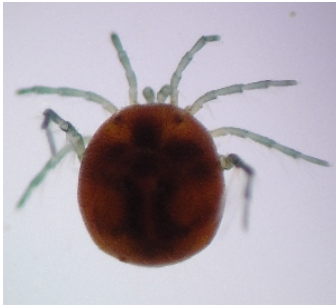

**Barb120531Ar1095 [Dorsal]**  
 Arrenurus  
 Family: Arrenuridae  
 BIN URI: BOLD:ACG4894

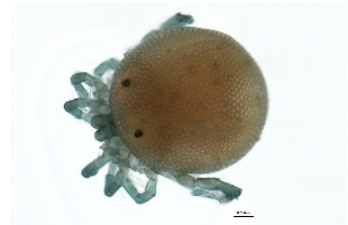

**CNC-IMS090088.062 [Dorsal]**  
 Arrenurus sp0988G  
 Family: Arrenuridae  
 BIN URI: BOLD:AAE6722

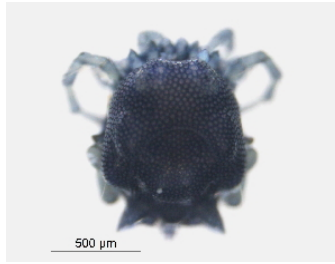

**BIOUG15122-B04 [Dorsal]**  
 Arrenurus  
 Family: Arrenuridae  
 BIN URI: BOLD:ACI3345

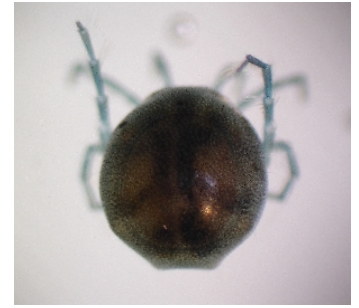

**LOKB120615Mi1166 [Dorsal]**  
 Arrenurus  
 Family: Arrenuridae  
 BIN URI: BOLD:ACL2659

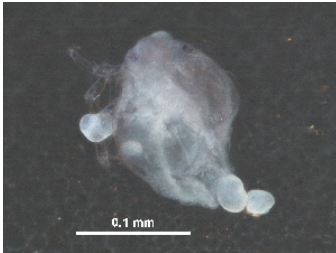

**BIOUG22864-A02 [Dorsal]**  
 Arrenuridae  
 Family: Arrenuridae  
 BIN URI: BOLD:ACV5390

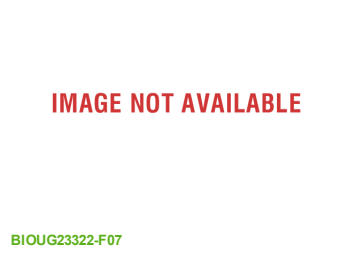

**BIOUG23322-F07**  
 Arrenurus  
 Family: Arrenuridae  
 BIN URI: BOLD:ACW0801

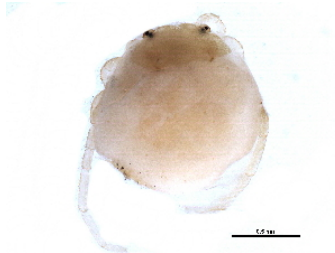

**BIOUG24005-B10 [Dorsal]**  
 Eylaidae  
 Family: Eylaidae

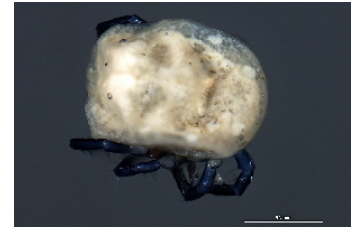

**CNC-IMS090088.116 [Dorsal]**  
 Neumania sp0988B  
 Family: Unionicolidae  
 BIN URI: BOLD:AAK8171

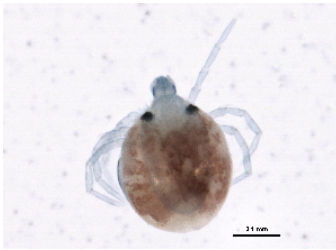

**BIOUG03993-H08 [Dorsal]**  
 Unionicolidae  
 Family: Unionicolidae  
 BIN URI: BOLD:ACC7553

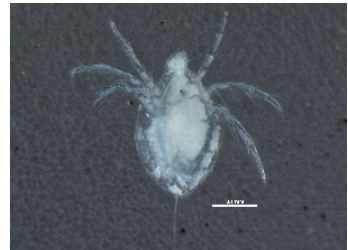

**BIOUG07005-D05 [Dorsal]**  
 Trombidiformes  
 BIN URI: BOLD:ACI7166

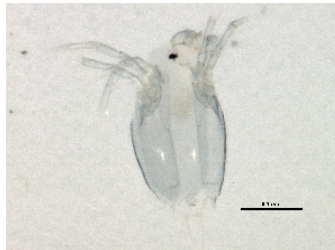

**BIOUG07022-E10 [Dorsal]**  
 Unionicola  
 Family: Unionicolidae  
 BIN URI: BOLD:ACJ8639

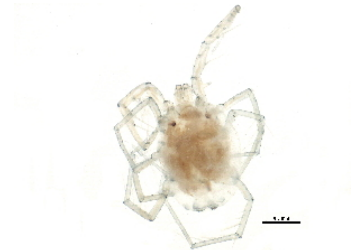

**BIOUG08018-B12 [Dorsal]**  
 Unionicolidae  
 Family: Unionicolidae  
 BIN URI: BOLD:ACH3803

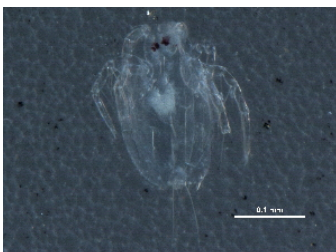

**BIOUG07022-E02 [Dorsal]**  
 Unionicolidae  
 Family: Unionicolidae  
 BIN URI: BOLD:ACI7165

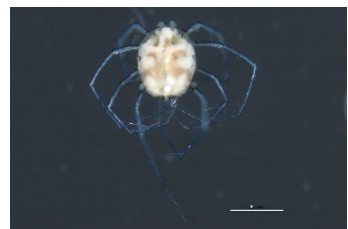

**CNC-IMS090088.125 [Dorsal]**  
 Unionicola sp0988A  
 Family: Unionicolidae  
 BIN URI: BOLD:AAE9937

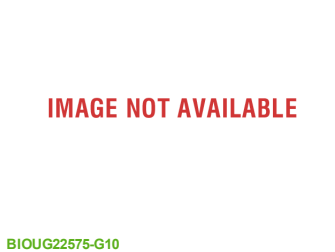

**BIOUG22575-G10**  
 Unionicolidae  
 Family: Unionicolidae  
 BIN URI: BOLD:ACH4393

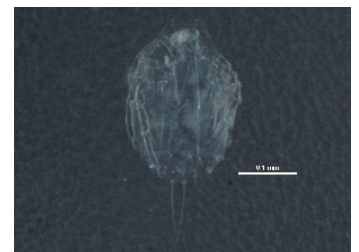

**BIOUG11728-C08 [Dorsal]**  
 Unionicola  
 Family: Unionicolidae  
 BIN URI: BOLD:ACG6284

IMAGE NOT AVAILABLE

BIOUG22575-E07  
Unionicola  
Family: Unionicolidae  
BIN URI: BOLD:ACV4538

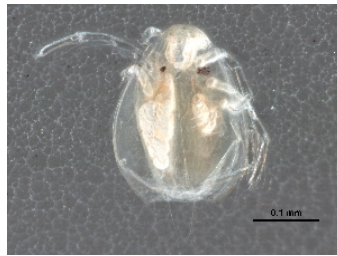

BIOUG21888-D12 [Dorsal]  
Unionicolidae  
Family: Unionicolidae  
BIN URI: BOLD:ACV5809

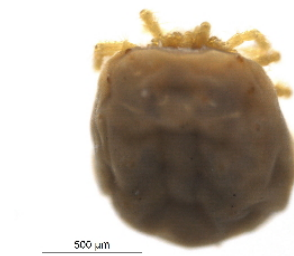

BIOUG15122-E09 [Dorsal]  
Hydrodroma  
Family: Hydrodromidae  
BIN URI: BOLD:AAN6616

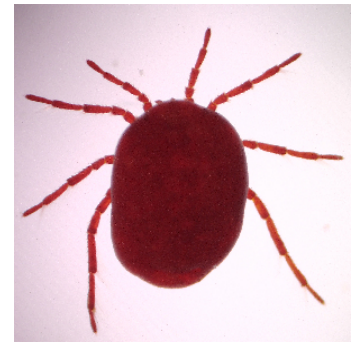

Barb120531Hy1006 [Dorsal]  
Hydryphantes  
Family: Hydryphantidae  
BIN URI: BOLD:ACH9257

IMAGE NOT AVAILABLE

BIOUG23322-D01  
Pionidae  
Family: Pionidae  
BIN URI: BOLD:ACW0855

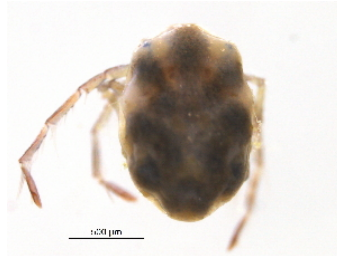

BIOUG15122-C05 [Dorsal]  
Piona  
Family: Pionidae  
BIN URI: BOLD:ACE2606

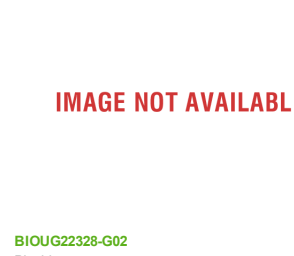

BIOUG22328-G02  
Pionidae  
Family: Pionidae  
BIN URI: BOLD:ACU5376

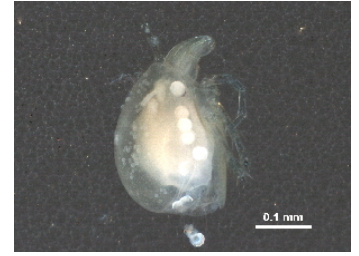

BIOUG22864-G03 [Dorsal]  
Pionidae  
Family: Pionidae  
BIN URI: BOLD:ACV5563

IMAGE NOT AVAILABLE

BIOUG23322-B03 [Dorsal]  
Pionidae  
Family: Pionidae  
BIN URI: BOLD:ACW1303

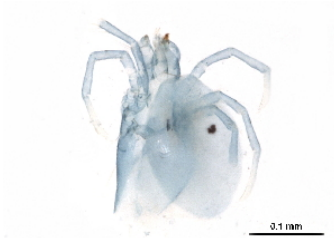

BIOUG24005-D08  
Pionidae  
Family: Pionidae

IMAGE NOT AVAILABLE

BIOUG24005-B03  
Arrenuridae  
Family: Arrenuridae

IMAGE NOT AVAILABLE

BIOUG24005-B02  
Trombidiformes

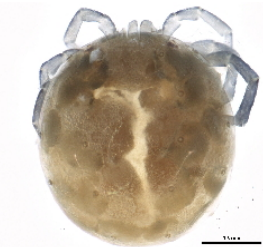

BIOUG08018-B06 [Dorsal]  
Lebertia  
Family: Lebertiidae  
BIN URI: BOLD:ACK1955

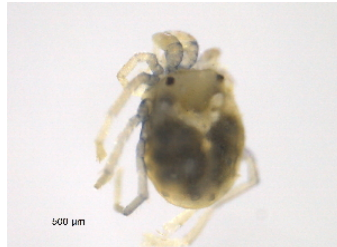

BIOUG15122-H08 [Dorsal]  
Sperchon  
Family: Sperchontidae  
BIN URI: BOLD:ACO5111

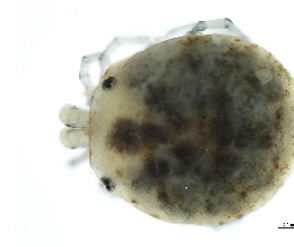

BIOUG05536-D03 [Lateral]  
Trombidiformes  
BIN URI: BOLD:ACF7275

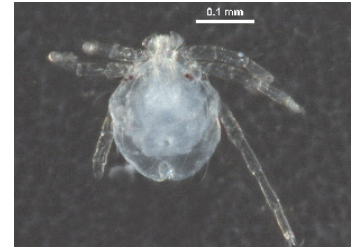

BIOUG22240-F09 [Dorsal]  
Trombidiformes  
BIN URI: BOLD:ACV3338



Copyright © 2014 BOLD Systems. All rights reserved.
