# Supplementary material for: Biodiversity inventories in high gear: DNA barcoding facilitates a rapid biotic survey of a temperate nature reserve
Source: PubMed Central journal article supplement (PMC4568406; doi:10.3897/bdj.3.e6313), 2015-08-30
Supplement: biodiversity_data_journal-3-e6313-s012.pdf [file biodiversity_data_journal-3-e6313-s012.pdf]

**A**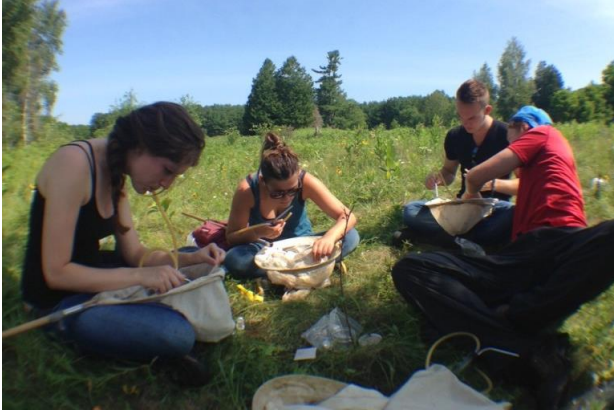**B**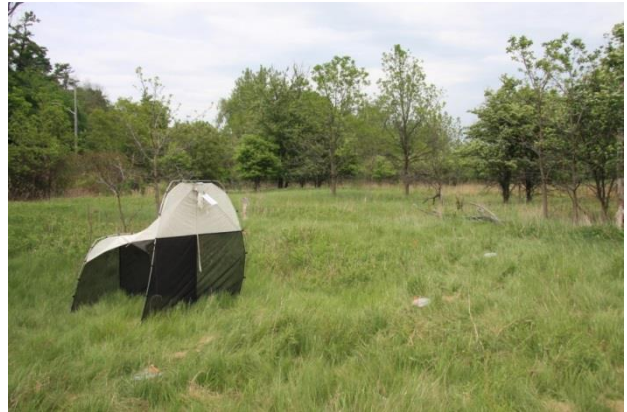**C**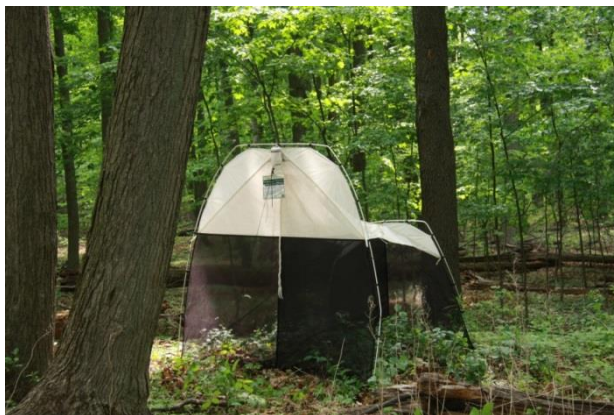**D**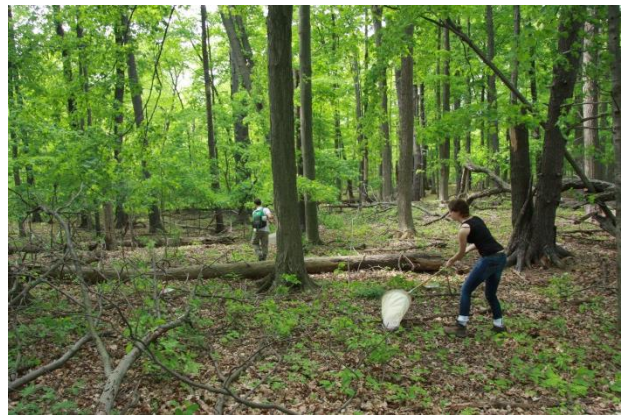

**Suppl. material 12.** Images of sampling sites and sampling events during May to August, 2015 at *rare Charitable Research Reserve*. (A) Collection technicians (from left) Shannon MacDonald, Anais Pages, Thibault Kosuth, and Nate Jones, aspirating their catch of insects after a sweep-netting event at the Thompson Tract meadow. (B) Malaise trap and a transect of pitfalls, indicated by orange flagging tape, at the Thompson Tract meadow site. (C) Malaise trap in the Hogsback forest site. (D) Collection technicians (from left) Josh Persi and Shannon MacDonald performing a sweep-netting event at the Hogsback forest site.

**E**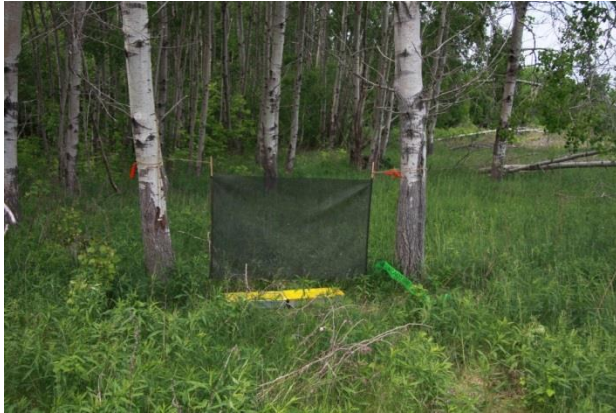**F**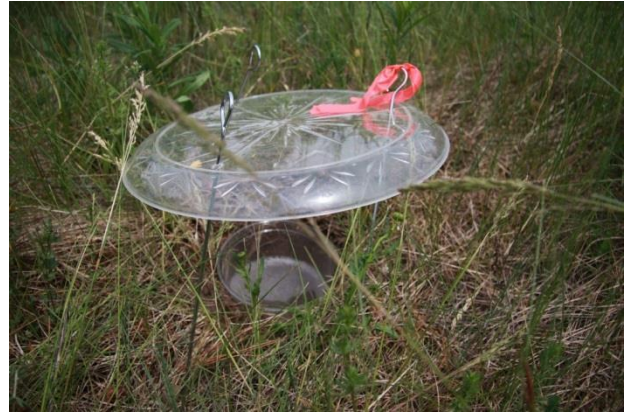**G**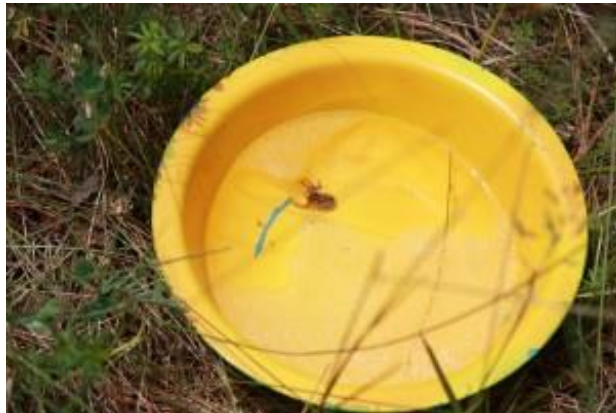**H**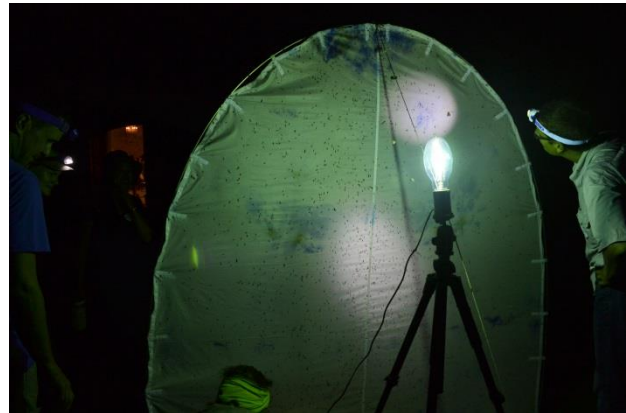

**Suppl. material 12.** Images of various trap methods employed to collect arthropods at *rare* Charitable Research Reserve. (E) An intercept trap which uses a wall of mesh attached to two poles to intercept insects in flight. Below the mesh is a yellow collecting tray filled with soapy water as the trapping agent. (F) A pitfall trap dug into the ground and filled with soapy water to capture crawling arthropods. A clear lid is used to help prevent leaves and rain from disturbing the sample. (G) A yellow pan trap used to capture pollinators, among other specimens. Here, pictured with a spider caught only a minute after trap deployment. (H) Tomas Roslin, a senior researcher from the University of Helsinki in Finland, using a night sheet and UV light to collect moths during the *rare* Bioblitz event.

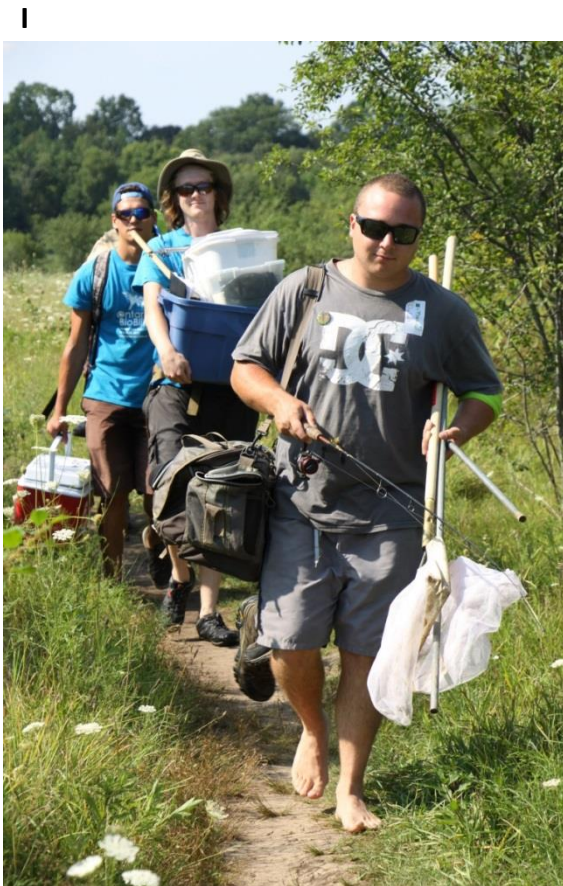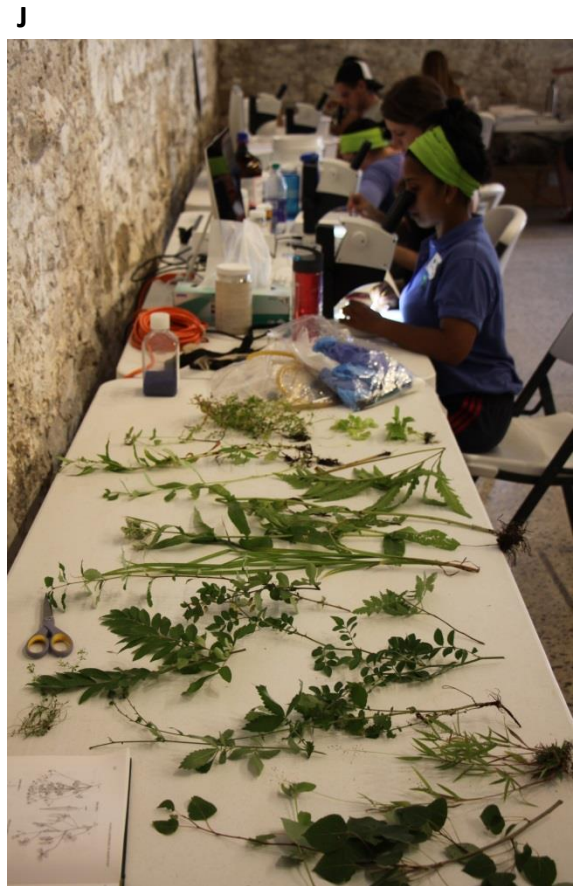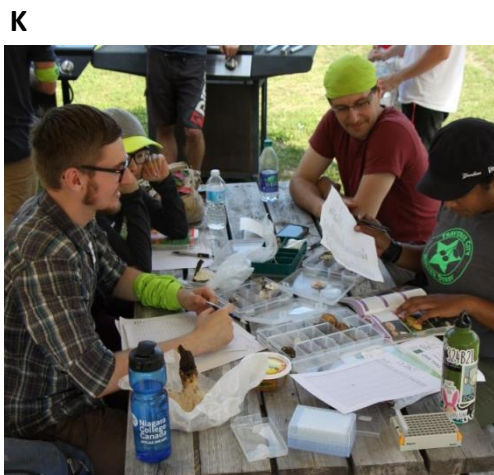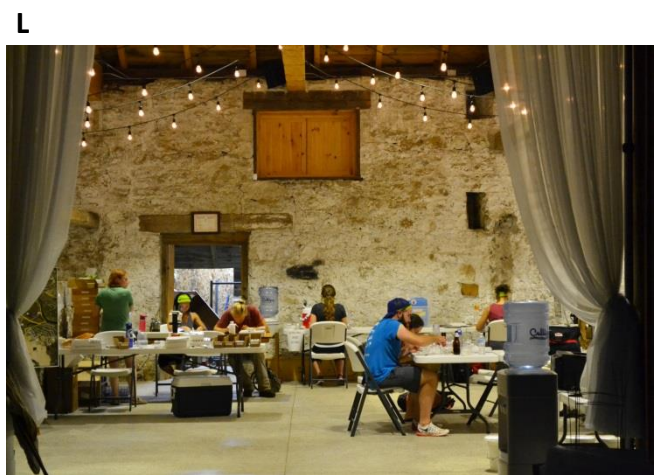

**Suppl. material 12.** Images of Collection technicians, researchers, and volunteers working together during the *rare* Bioblitz. (I) (From left) Adrian Boskovic, Nate Jones, and Dylan Dobias bringing back their samples after conducting aquatic collections at the Grand River. (J) Plant samples laid out for identification by plant specialists while Thanushi Eagalle and other Bioblitz participants sort specimens to order through microscopes. (K) (From left) Chris Hay, Linxi Xie, Nimalka Weerasuriya, and Rob Lauder identifying fungi samples. (L) The *rare* barn turned into a lab space as Bioblitz participants get plates of specimens ready to be sent to the lab for lysis at the end of the Bioblitz day. From left: Crystal Sobel, Kate Perez, Dan Engelking, Renee Labbee, Connor Warne and Jaclyn McKeown (behind), and Valerie Levesque-Beaudin.

**M**

1 mm

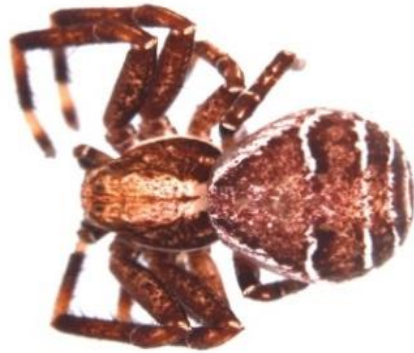

*Xysticus winnipegensis*  
Turnbull, Dondale & Redner, 1965

**N**

2 mm

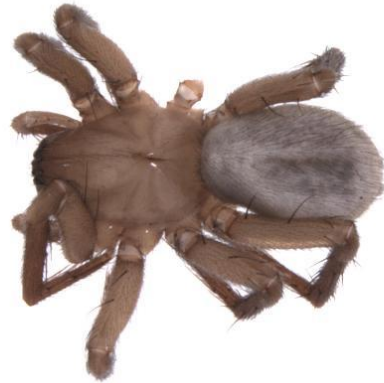

*Cicurina pallida*  
Keyserling, 1887

**O**

1 mm

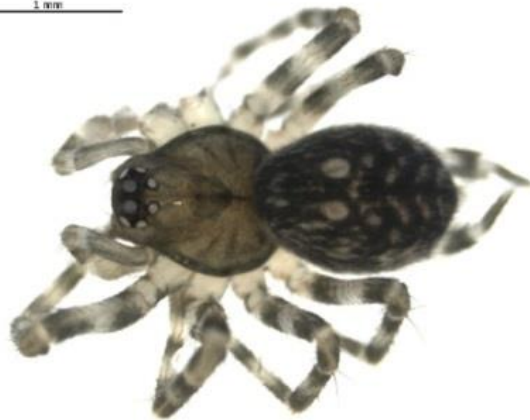

*Neoantistea gosiuta*  
Gertsch, 1934

**Suppl. material 12.** Images of three spider species collected from *rare Charitable Research Reserve* during May to August 2015 which represent new species records for the province of Ontario. (M) *Xysticus winnipegensis* Turnbull, Dondale & Redner, 1965, (N) *Cicurina pallida* Keyserling, 1887, (O) *Neoantistea gosiuta* Gertsch, 1934.

All images were taken by the Biodiversity Institute of Ontario and freely available through the Creative Commons License 'Attribution-NonCommercial 2.0 Canada (CC BY-NC 2.0 CA)'
