# Supplementary material for: Biodiversity inventories in high gear: DNA barcoding facilitates a rapid biotic survey of a temperate nature reserve
Source: Biodivers Data J. 2015 Aug 30;(3):e6313. doi: 10.3897/BDJ.3.e6313 (PMC4568406; doi:10.3897/BDJ.3.e6313)
Supplement: Supplementary material 1 — Species inventory of rare prior to May 2015 [file biodiversity_data_journal-3-e6313-s001.xlsx]

## Sheet: Sheet1
		Family	Species Name	Common Name
	AMBPHIBIANS
		Ambystomidae	Ambystoma jeffersonianum x laterale	Blue-Spotted/Jefferson Complex
		Ambystomidae	Ambystoma laterale	Blue-Spotted Salamander
		Ambystomidae	Ambystoma maculatum	Spotted Salamander
		Bufonidae	Anaxyrus americanus	American Toad
		Hylidae	Hyla versicolor	Gray Tree Frog
		Hylidae	Pseudacris crucifer	Spring Peeper
		Hylidae	Pseudacris triseriata	Striped Chorus Frog
		Plethodontidae	Hemidactylium scutatum	Four-toed Salamander
		Plethodontidae	Plethodon cinereus	Red-backed Salamander
		Ranidae	Lithobates pipiens	Northern Leopard Frog
		Ranidae	Rana catesbeiana	Bullfrog
		Ranidae	Rana clamitans	Green Frog
		Ranidae	Rana sylvatica	Wood Frog
	BIRDS
		Accipitridae	Accipiter cooperii	Cooper's Hawk
		Accipitridae	Accipiter gentilis	Northern Goshawk
		Accipitridae	Accipiter striatus	Sharp-shinned Hawk
		Accipitridae	Agelaius phoeniceus	Red-winged Blackbird
		Accipitridae	Aquila chrysaetos	Golden Eagle
		Accipitridae	Buteo jamaicensis	Red-tailed Hawk
		Accipitridae	Buteo lagopus	Rough-legged Hawk
		Accipitridae	Buteo lineatus	Red-shouldered Hawk
		Accipitridae	Buteo platypterus	Broad-winged Hawk
		Accipitridae	Circus cyaneus	Northern Harrier
		Accipitridae	Haliaeetus leucocephalus	Bald Eagle
		Alaudidae	Eremophilia alpestris	Horned Lark
		Alcedinidae	Megaceryle alcyon	Belted Kingfisher
		Anatidae	Aix sponsa	Wood Duck
		Anatidae	Anas acuta	Northern Pintail
		Anatidae	Anas americana	American Wigeon
		Anatidae	Anas clypeata	Northern Shoveler
		Anatidae	Anas crecca	Green-winged Teal
		Anatidae	Anas discors	Blue-winged Teal
		Anatidae	Anas platyrhynchos	Mallard
		Anatidae	Anas rubripes	American Black Duck
		Anatidae	Anas strepera	Gadwall
		Anatidae	Aythya affinis	Lesser Scaup
		Anatidae	Aythya americana	Redhead
		Anatidae	Aythya collaris	Ring-necked Duck
		Anatidae	Aythya marila	Greater Scaup
		Anatidae	Aythya valisineria	Canvasback
		Anatidae	Branta bernicla	Brant Goose
		Anatidae	Branta canadensis	Canada Goose
		Anatidae	Branta hutchinsii	Cackling Goose
		Anatidae	Bucephala albeola	Bufflehead
		Anatidae	Bucephala clangula	Common Goldeneye
		Anatidae	Chen caerulescens	Snow Goose
		Anatidae	Clangula hyemalis	Long-tailed Duck
		Anatidae	Cygnus buccinator	Trumpeter Swan
		Anatidae	Cygnus columbianus	Tundra Swan
		Anatidae	Cygnus olor	Mute Swan
		Anatidae	Lophodytes cucullatus	Hooded Merganser
		Anatidae	Melanerpes erythrocephalus	Red-headed Woodpecker
		Anatidae	Mergus merganser	Common Merganser
		Anatidae	Mergus serrator	Red-breasted Merganser
		Anatidae	Oxyura jamaicensis	Ruddy Duck
		Apodidae	Chaetura pelagica	Chimney Swift
		Ardeidae	Ardea alba	Great Egret
		Ardeidae	Ardea herodias	Great Blue Heron
		Ardeidae	Botaurus lentiginosus	American Bittern
		Ardeidae	Butorides virescens	Green Heron
		Ardeidae	Chlidonias niger	Black Tern
		Ardeidae	Egretta caerulea	Little Blue Heron
		Bombycillidae	Bombycilla cedrorum	Cedar Waxwing
		Calcariidae	Calcarius lapponicus	Lapland Longspur
		Caprimulgidae	Caprimulgus vociferus	Eastern Whip-poor-will
		Caprimulgidae	Chordeiles minor	Common Nighthawk
		Cardinalidae	Cardinalis cardinalis	Northern Cardinal
		Cardinalidae	Passerina cyanea	Indigo Bunting
		Cardinalidae	Pheucticus ludovicianus	Rose-breasted Grosbeak
		Cardinalidae	Plectrophenax nivalis	Snow Bunting
		Cathartidae	Cathartes aura	Turkey Vulture
		Certhiidae	Certhia americana	Brown Creeper
		Charadriidae	Charadrius semipalmatus	Semipalmated Plover
		Charadriidae	Charadrius vociferus	Killdeer
		Columbidae	Columba livia	Rock Pigeon
		Columbidae	Zenaida macroura	Mourning Dove
		Corvidae	Corvus brachyrhynchos	American Crow
		Corvidae	Corvus corax	Common Raven
		Corvidae	Cyanocitta cristata	Blue Jay
		Cuculidae	Coccyzus americanus	Yellow-billed Cuckoo
		Cuculidae	Coccyzus erythropthalmus	Black-billed Cuckoo
		Emberizidae	Ammodramus leconteii	LeConte’s Sparrow
		Emberizidae	Ammodramus nelsoni	Nelson's Sparrow
		Emberizidae	Ammodramus savannarum	Grasshopper Sparrow
		Emberizidae	Junco hyemalis	Dark-eyed Junco
		Emberizidae	Melospiza georgiana	Swamp Sparrow
		Emberizidae	Melospiza lincolnii	Lincoln's Sparrow
		Emberizidae	Melospiza melodia	Song Sparrow
		Emberizidae	Passerculus sandwichensis	Savannah Sparrow
		Emberizidae	Passerella iliaca	Fox Sparrow
		Emberizidae	Pipilo erythrophthalmus	Eastern Towhee
		Emberizidae	Pipilo maculatus	Spotted Towhee
		Emberizidae	Pooecetes gramineus	Vesper Sparrow
		Emberizidae	Spizella arborea	American Tree Sparrow
		Emberizidae	Spizella pallida	Clay-coloured Sparrow
		Emberizidae	Spizella passerina	Chipping Sparrow
		Emberizidae	Spizella pusilla	Field Sparrow
		Emberizidae	Zonotrichia albicollis	White-throated Sparrow
		Emberizidae	Zonotrichia leucophrys	White-crowned Sparrow
		Falconidae	Falco columbarius	Merlin
		Falconidae	Falco peregrinus	Peregrine Falcon
		Falconidae	Falco sparverius	American Kestrel
		Fringillidae	Carduelis flammea	Common Redpoll
		Fringillidae	Carduelis pinus	Pine Siskin
		Fringillidae	Carduelis tristis	American Goldfinch
		Fringillidae	Carpodacus mexicanus	House Finch
		Fringillidae	Carpodacus purpureus	Purple Finch
		Fringillidae	Coccothraustes vespertinus	Evening Grosbeak
		Fringillidae	Loxia curvirostra	Red Crossbill
		Fringillidae	Loxia leucoptera	White-winged Crossbill
		Gaviidae	Gavia immer	Common Loon
		Gruidae	Grus canadensis	Sandhill Crane
		Hirundinidae	Hirundo rustica	Barn Swallow
		Hirundinidae	Petrochelidon pyrrhonota	Cliff Swallow
		Hirundinidae	Riparia riparia	Bank Swallow
		Hirundinidae	Stelgidopteryx serripennis	Northern Rough-winged Swallow
		Hirundinidae	Tachycineta bicolor	Tree Swallow
		Icteridae	Dolichonyx oryzivorus	Bobolink
		Icteridae	Euphagus carolinus	Rusty Blackbird
		Icteridae	Euphagus cyanocephalus	Brewer's Blackbird
		Icteridae	Icterus galbula	Baltimore Oriole
		Icteridae	Icterus spurius	Orchard Oriole
		Icteridae	Molothrus ater	Brown-headed Cowbird
		Icteridae	Quiscalus quiscula	Common Grackle
		Icteridae	Sturnella magna	Eastern Meadowlark
		Icteridae	Xanthocephalus xanthocephalus	Yellow-headed Blackbird
		Laniidae	Lanius excubitor	Northern Shrike
		Laridae	Chroicocephalus philadelphia	Bonaparte's Gull
		Laridae	Larus delawarensis	Ring-billed Gull
		Laridae	Larus fuscus	Lesser Black-backed Gull
		Laridae	Larus glaucoides	Iceland Gull
		Laridae	Larus hyperboreus	Glaucous Gull
		Laridae	Larus marinus	Great Black-backed Gull
		Laridae	Larus smithsonianus	Herring Gull
		Laridae	Larus thayeri	Thayer's Gull
		Laridae	Mniotilta varia	Black-and-white Warbler
		Laridae	Sterna hirundo	Common Tern
		Mimidae	Dumetella carolinensis	Gray Catbird
		Mimidae	Mimus polyglottos	Northern Mockingbird
		Mimidae	Toxostoma rufum	Brown Thrasher
		Motacillidae	Anthus rubescens	American Pipit
		Odontophoridae	Colinus virginianus	Northern Bobwhite
		Pandionidae	Pandion haliaetus	Osprey
		Paridae	Poecile atricapillus	Black-capped Chickadee
		Parulidae	Cardellina canadensis	Canada Warbler
		Parulidae	Cardellina pusilla	Wilson’s Warbler
		Parulidae	Geothlypis philadelphia	Mourning Warbler
		Parulidae	Geothlypis trichas	Common Yellowthroat
		Parulidae	Leiothlypis celata	Orange-crowned Warbler
		Parulidae	Leiothlypis peregrina	Tennessee Warbler
		Parulidae	Leiothlypis ruficapilla	Nashville Warbler
		Parulidae	Oporornis agilis	Connecticut Warbler
		Parulidae	Setophaga americana	Northern Parula
		Parulidae	Setophaga caerulescens	Black-throated Blue Warbler
		Parulidae	Setophaga castanea	Bay-breasted Warbler
		Parulidae	Setophaga citrina	Hooded Warbler
		Parulidae	Setophaga coronata	Yellow-rumped Warbler
		Parulidae	Setophaga discolor	Prairie Warbler
		Parulidae	Setophaga fusca	Blackburnian Warbler
		Parulidae	Setophaga magnolia	Magnolia Warbler
		Parulidae	Setophaga palmarum	Palm Warbler
		Parulidae	Setophaga pensylvanica	Chestnut-sided Warbler
		Parulidae	Setophaga petechia	Yellow Warbler
		Parulidae	Setophaga pinus	Pine Warbler
		Parulidae	Setophaga ruticilla	American Redstart
		Parulidae	Setophaga striata	Blackpoll Warbler
		Parulidae	Setophaga tigrina	Cape May Warbler
		Parulidae	Setophaga virens	Black-throated Green Warbler
		Parulidae	Vermivora chrysoptera	Golden Winged Warbler
		Parulidae	Vermivora cyanoptera	Blue-winged Warbler
		Passeridae	Passer domesticus	House Sparrow
		Peucedramidae	Nycticorax nycticorax	Black-crowned Night-Heron
		Peucedramidae	Parkesia noveboracensis	Northern Waterthrush
		Peucedramidae	Picoides arcticus	Black-backed Woodpecker
		Peucedramidae	Seiurus aurocapilla	Ovenbird
		Phalacrocoracidae	Phalacrocorax auritus	Double-crested Cormorant
		Phasianidae	Bonasa umbellus	Ruffed Grouse
		Phasianidae	Meleagris gallopavo	Wild Turkey
		Phasianidae	Phasianus colchicus	Ring-necked Pheasant
		Picidae	Colaptes auratus	Northern Flicker
		Picidae	Dryocopus Pileatus	Pileated Woodpecker
		Picidae	Melanerpes carolinus	Red-bellied Woodpecker
		Picidae	Picoides pubescens	Downy Woodpecker
		Picidae	Picoides villosus	Hairy Woodpecker
		Picidae	Sphyrapicus varius	Yellow-bellied Sapsucker
		Podicipedidae	Podiceps auritus	Horned Grebe
		Podicipedidae	Podiceps grisegena	Red-neck Grebe
		Podicipedidae	Podilymbus podiceps	Pied-billed Grebe
		Rallidae	Fulica americana	American Coot
		Rallidae	Porzana carolina	Sora
		Rallidae	Rallus limicola	Virginia Rail
		Regulidae	Regulus calendula	Ruby-crowned Kinglet
		Regulidae	Regulus satrapa	Golden-crowned Kinglet
		Scolopacidae	Actitis macularius	Spotted Sandpiper
		Scolopacidae	Arenaria interpres	Ruddy Turnstone
		Scolopacidae	Bartramia longicauda	Upland Sandpiper
		Scolopacidae	Calidris alpina	Dunlin
		Scolopacidae	Calidris bairdii	Baird’s Sandpiper
		Scolopacidae	Calidris melanotos	Pectoral Sandpiper
		Scolopacidae	Calidris minutilla	Least Sandpiper
		Scolopacidae	Calidris pusilla	Semipalmated Sandpiper
		Scolopacidae	Gallinago delicata	Wilson's Snipe
		Scolopacidae	Scolopax minor	American Woodcock
		Scolopacidae	Tringa flavipes	Lesser Yellowlegs
		Scolopacidae	Tringa melanoleuca	Greater Yellowlegs
		Scolopacidae	Tringa solitaria	Solitary Sandpiper
		Sittidae	Sitta canadensis	Red-breasted Nuthatch
		Sittidae	Sitta carolinensis	White-breasted Nuthatch
		Sternidae	Hydroprogne caspia	Caspian Tern
		Strigidae	Aegolius acadicus	Northern Saw-whet Owl
		Strigidae	Asio flammeus	Short-eared Owl
		Strigidae	Bubo virginianus	Great Horned Owl
		Strigidae	Megascops asio	Eastern Screech Owl
		Strigidae	Strix varia	Barred Owl
		Sturnidae	Sturnus vulgaris	European Starling
		Sylviidae	Polioptila caerulea	Blue-gray Gnatcatcher
		Thraupidae	Piranga olivacea	Scarlet Tanager
		Trochilidae	Archilochus colubris	Ruby-throated Hummingbird
		Troglodytidae	Cistothorus palustris	Marsh Wren
		Troglodytidae	Thryothorus ludovicianus	Carolina Wren
		Troglodytidae	Troglodytes aedon	House Wren
		Troglodytidae	Troglodytes hiemalis	Winter Wren
		Turdidae	Catharus fuscescens	Veery
		Turdidae	Catharus guttatus	Hermit Thrush
		Turdidae	Catharus minimus	Gray-cheeked Thrush
		Turdidae	Catharus ustulatus	Swainson's Thrush
		Turdidae	Hylocichla mustelina	Wood Thrush
		Turdidae	Sialia sialis	Eastern Bluebird
		Turdidae	Turdus migratorius	American Robin
		Tyrannidae	Contopus cooperi	Olive-Sided Flycatcher
		Tyrannidae	Contopus virens	Eastern Wood Pewee
		Tyrannidae	Empidonax alnorum	Alder Flycatcher
		Tyrannidae	Empidonax flaviventris	Yellow-bellied Flycatcher
		Tyrannidae	Empidonax Minimus	Least Flycatcher
		Tyrannidae	Empidonax traillii	Willow Flycatcher
		Tyrannidae	Myiarchus crinitus	Great Crested Flycatcher
		Tyrannidae	Sayornis phoebe	Eastern Phoebe
		Tyrannidae	Tyrannus tyrannus	Eastern Kingbird
		Vireonidae	Vireo flavifrons	Yellow-throated Vireo
		Vireonidae	Vireo gilvus	Warbling Vireo
		Vireonidae	Vireo griseus	White-eyed Vireo
		Vireonidae	Vireo olivaceus	Red-eyed Vireo
		Vireonidae	Vireo philadelphicus	Philadelphia Vireo
		Vireonidae	Vireo solitarius	Blue-headed Vireo
	FISHES
		Catostomidae	Catostomus catostomus	Longnose Sucker
		Catostomidae	Catostomus commersonii	White Sucker
		Catostomidae	Hypentelium nigricans	Northern Hog Sucker
		Catostomidae	Moxostoma erythrurum	Golden Redhorse
		Catostomidae	Moxostoma valenciennesi	Greater Redhorse
		Centrarchidae	Ambloplites rupestris	Rock Bass
		Centrarchidae	Lepomis gibbosus	Pumpkinseed
		Centrarchidae	Micropterus dolomieu	Smallmouth Bass
		Centrarchidae	Micropterus salmoides	Largemouth Bass
		Centrarchidae	Pomoxis nigromaculatus	Black Crappie
		Cyprinidae	Cyprinella spiloptera	Spotfin Shiner
		Cyprinidae	Cyprinus Carpio	Common Carp
		Cyprinidae	Luxilus chrysocephalus	Striped Shiner
		Cyprinidae	Luxilus cornutus	Common Shiner
		Cyprinidae	Nocomis biguttatus	Hornyhead Chub
		Cyprinidae	Notropis photogenis	Silver Shiner
		Cyprinidae	Pimephales notatus	Bluntnose Minnow
		Cyprinidae	Rhinichthys atratulus	Blacknose Dace
		Cyprinidae	Semotilus atromaculatus	Creek Chub
		Esocidae	Esox lucius	Northern Pike
		Ictaluridae	Ameiurus nebulosus	Brown Bullhead
		Ictaluridae	Noturus flavus	Stonecat
		Percidae	Etheostoma blennioides	Greenside Darter
		Percidae	Etheostoma exile	Iowa Darter
		Percidae	Etheostoma nigrum	Johnny Darter
		Percidae	Perca flavescens	Yellow Perch
		Percidae	Percina maculata	Blackside Darter
		Salmonidae	Salvelinus fontinalis	Brook Trout
	FUNGI and SLIME MOLDS
		Agaricaceae	Agaricus arvensis	Horse Mushroom
		Agaricaceae	Agaricus placomyces	Eastern Flat Topped Agaricus
		Agaricaceae	Calvatia gigantea	Giant Puffball
		Agaricaceae	Coprinus comatus	Shaggy Mane
		Agaricaceae	Lepiota clypeolaria	Shield Dapperling
		Agaricaceae	Lepiota cristata	Stinking Dapperling
		Agaricaceae	Leucoagaricus naucinus	Smooth Lepiota
		Agaricaceae	Lycoperdon perlatum	Common Puffball
		Agaricaceae	Parasola plicatilis	Pleated Ink Cap
		Auriscalpiaceae	Lentinellus ursinus	Bear Lentinus
		Bankeraceae	Boletopsis subsquamosa	Kurotake
		Bolbitiaceae	Conocybe rugosa
		Bolbitiaceae	Panaeolus foenisecii	Mower's Mushroom
		Boletaceae	Boletinellus merulioides	Ash Tree bolete
		Boletaceae	Leccinum scabrum	Rough-stemmed bolete, scaber bolete
		Bulgariaceae	Bulgaria inquinans	Black Bulgar
		Cantharellaceae	Craterellus fallax	The Black Trumpet
		Clavariaceae	Multiclavula mucida	White green-algae coral
		Corticiaceae	Phlebia tremellosa	Trembling Merulius
		Cortinariaceae	Gymnopilus spectabilis	Laughing Gym
		Cortinariaceae	Inocybe geophylla	Earthy Inocybe
		Dacrymycetaceae	Calocera cornea	Club-like tuning fork
		Entolomataceae	Clitopilus prunulus	Sweetbread Mushroom, Miller
		Entolomataceae	Clitopilus scyphoides
		Entolomataceae	Entoloma abortivum	Aborted Entoloma
		Entolomataceae	Entoloma spp.
		Entolomataceae	Entoloma strictus	Straight Stalked Entoloma
		Entolomataceae	Leptonia incana
		Exidiaceae	Exidia alba	Pale jelly roll
		Exidiaceae	Exidia glandulosa	Black jelly roll
		Fomitopsidaceae	Ischnoderma resinosum	Resinous Polypore, Late Fall Polypore
		Fomitopsidaceae	Piptoporus betulinus	Birch Polypore
		Fomitopsidaceae	Postia caesia	Conifer Blueing Bracket
		Fomitopsidaceae	Postia fragilis	Staining Cheese Polypore
		Ganodermataceae	Ganoderma applanatum	Artist’s Bracket
		Ganodermataceae	Ganoderma lucidum	Lingzhi Mushroom or Hemlock Varnish Shelf
		Geastraceae	Geastrum fimbriatum	Fringed Earthstar, Sessile Earthstar
		Geastraceae	Geastrum quadrifidum	Rayed Earthstar
		Gomphaceae	Ramaria spp.
		Gomphaceae	Ramaria stricta	Strict Branch Coral
		Helotiaceae	Ascocoryne cylichnium
		Helotiaceae	Bisporella citrina	Yellow Fairy Cups
		Helotiaceae	Chlorociboria aeruginascens	Green Elfcup
		Hericiaceae	Hericium americanum	Bear's Head Tooth
		Hericiaceae	Hericium coralloides	Comb Tooth
		Hericiaceae	Hericium erinaceus	Lion's Mane Mushroom
		Hygrophoraceae	Arrhenia epichysium
		Hygrophoraceae	Hygrocybe coccinea	Scarlet Wax Cap
		Hygrophoraceae	Hygrocybe flavescens
		Hygrophoraceae	Hygrocybe miniata	Vermillion Wax Cap
		Hygrophoraceae	Hygrocybe pratensis	Meadow Wax Cap
		Hygrophoraceae	Hygrocybe punicea	Crimson Waxy Cap
		Hygrophoraceae	Hygrocybe virginea	Snowy wax cap
		Hygrophoraceae	Hygrophorus eburneus	Ivory Waxy Cap, Cowboy's handkerchief
		Hymenogastraceae	Galerina autumnalis	Funeral Bell
		Hymenogastraceae	Hebeloma crustuliniforme	Poison Pie, Fairy Cake
		Hypocreaceae	Hypomyces lactifluorum	Lobster Mushroom
		Inocybaceae	Crepidotus applanatus	Flat Crep
		Inocybaceae	Crepidotus mollis	Jelly Crep, soft slipper
		Inocybaceae	Inocybe rimosa
		Inocybaceae	Inocybe spp.	Fiber Caps
		Inocybaceae	Crepidotus crocophyllus	Orange Crep
		Lycoperdaceae	Lycoperdon pyriforme	Pear Shaped Puffball
		Lyophyllaceae	Lyophyllum decastes	Fried Chicken Mushroom
		Marasmiaceae	Baeospora myosura	Conifercone Cap
		Marasmiaceae	Marasmius rotula	Pinwheel mushroom
		Marasmiaceae	Micromphale foetidum	stinking Marasmius
		Marasmiaceae	Pleurocybella porrigens	Angel Wing
		Marasmiaceae	Rhodocollybia butryacea	Butter Cap
		Marasmiaceae	Gymnopus acervatus	Clustered Collybia
		Marasmiaceae	Xerula furfuracea	Rooted Collybia
		Meripilaceae	Gloeoporus dichrous
		Meripilaceae	Grifola frondosa	Hen of the Woods
		Meruliaceae	Bjerkandera adusta	Smoky Polypore
		Meruliaceae	Climacodon septentrionale	Northern Tooth Fungus
		Meruliaceae	Phlebia radiata	Radiating Phlebia
		Meruliaceae	Porotheleum fimbriatum
		Mycenaceae	Mycena galericulata	Common Bonnet
		Mycenaceae	Mycena haematopus	Bleeding Fairy Helmet
		Mycenaceae	Mycena inclinata	Clustered Bonnett
		Mycenaceae	Mycena leaiana	Orange Mycena
		Mycenaceae	Mycena osmundicola
		Mycenaceae	Mycena spp.	Bonnets
		Mycenaceae	Panellus stipticus	Bitter oyster
		Mycenaceae	Xeromphalina kauffmanii	Cross-veined troop mushroom
		Pezizaceae	Peziza repanda	Palamino Cup
		Phallaceae	Phallus duplicatus	Veiled/Netted Stinkhorn
		Phallaceae	Phallus impudicus	Common Stinkhorn
		Phallaceae	Phallus ravenelii	Ravenel's Stinkhorn
		Phanerochaetaceae	Steccherinum ochraceum	ochre spreading tooth
		Physalacriaceae	Armillaria gallica
		Physalacriaceae	Armillaria mellea complex	Honey Mushroom
		Physalacriaceae	Armillaria ostoyae	Dark Honey Fungus
		Physalacriaceae	Flammulina velutipes	Velvet Shank
		Physalacriaceae	Xerula megalospora
		Pleurotaceae	Pleurotus ostreatus	Oyster Mushroom
		Pluteaceae	Pluteus atromarginatus	Black Edged Pluteus
		Pluteaceae	Pluteus cervinus	Deer Shield
		Pluteaceae	Pluteus umbrosus	Velvet Shield
		Polyporaceae	Cerrena unicolor	Mossy Maze Polypore
		Polyporaceae	Daedaleopsis confragosa	Thin Maze Polypore
		Polyporaceae	Favolus alveolaris	Hexagonal-pored Polypore
		Polyporaceae	Fomes fomentarius	Tinder Fungus
		Polyporaceae	Laetiporus sulphureus	Crab/Chicken on the Woods
		Polyporaceae	Lenzites betulina	Gilled polypore
		Polyporaceae	Polyporus badius	Black Footed Polypore
		Polyporaceae	Polyporus brumalis	Winter Polypore
		Polyporaceae	Polyporus radicatus	Rooting Polypore
		Polyporaceae	Polyporus squamosus	Dryad’s Saddle
		Polyporaceae	Polyporus varius	Elegant Polypore
		Polyporaceae	Trametes elegans
		Polyporaceae	Trametes pubescens	White Rot Fungus
		Polyporaceae	Trametes versicolor	Turkey Tail
		Polyporaceae	Trichaptum abietinum	Violet Toothed Polypore
		Polyporaceae	Trichaptum biforme
		Polyporaceae	Tyromyces chioneus	White Cheese Polypore
		Psathyrellaceae	Coprinellus micaceus	Mica Cap
		Psathyrellaceae	Coprinopsis atramentaria	Common Ink Cap
		Psathyrellaceae	Coprinus disseminatus	Fairies Bonnets
		Psathyrellaceae	Psathyrella candolleana
		Pyronemataceae	Aleuria aurantia	Orange Peel Fungus
		Pyronemataceae	Jafnea semitosta
		Pyronemataceae	Scutellinia scutellata	Molly Eye-Winker
		Pyronemataceae	Scutellinia setosa	Orange Eyelash Cup
		Pyronemataceae	Tarzetta cupularis	Dentate Elf Cup
		Reticulariaceae	Tubifera ferruginosa	Red Raspberry Slime
		Russulaceae	Lactarius torminosus	Woolly Milkcap, Bearded Milkcap
		Russulaceae	Russula rosacea	Rosy Russula
		Russulaceae	Russula spp.
		Sclerodermataceae	Scleroderma citrinum	Common Earthball
		Steccherinaceae	Irpex lacteus	Milk White Toothed Polypore
		Stemonitidae	Stemonitis axifera	Chocolate tube slime, tree hair
		Stereaceae	Stereum ostrea	False Turkey Tail
		Stereaceae	Stereum rugosum
		Stereaceae	Stereum striatum	Silky parchment
		Strophariaceae	Agrocybe praecox	Spring Field Cap
		Strophariaceae	Gymnopilus penetrans	Common Rustgill
		Strophariaceae	Gymnopolis sapineus	Scaly Rustgill
		Strophariaceae	Hypholoma capnoides
		Strophariaceae	Hypholoma fasciculare	Sulphur Tuft
		Strophariaceae	Hypholoma sublateritium	Brick Cap
		Strophariaceae	Pholiota aurivella	Golden Photiota
		Strophariaceae	Pholiota squarrosa	shaggy scalycap
		Strophariaceae	Pholiota squarrosoides	Scaly Pholiota
		Suillaceae	Suillus americanus	Chicken Fat Mushroom
		Suillaceae	Suillus brevipes	Stubby Stalk, Short Stemmed Slippery Jack
		Suillaceae	Suillus granulatus	Weeping bolete, granulated bolete
		Suillaceae	Suillus luteus	Slippery Jack
		Tremellaceae	Tremella foliacea	Jelly Leaf
		Tremellaceae	Tremella reticulate
		Tricholomataceae	Clitocybe ectypoides	Wood Clitocybe
		Tricholomataceae	Clitocybe gibba	Common Funnel
		Tricholomataceae	Collybia cookei
		Tricholomataceae	Hygrophorus langei
		Tricholomataceae	Hypsizygus tessulatus	Beech Mushroom
		Tricholomataceae	Lepista irina	Flowery Blewit
		Tricholomataceae	Lepista nuda	Wood Blewit, Blue Stock Mushroom
		Tricholomataceae	Omphalina spp.
		Tricholomataceae	Phyllotopsis nidulans	Mock Oyster
		Tricholomataceae	Rhodotus palmatus	Netted Rhodotus
		Tricholomataceae	Tricholoma aurantium	Golden Orange Tricholoma
		Tricholomataceae	Tricholoma myomyces	Mouse Mushroom
		Tricholomataceae	Tricholoma terreum	Earth Grey Tricholoma
		Tricholomataceae	Tricholoma virgatum	Ashen Knight
		Tricholomataceae	Xeromphalina cauticinalis
		Tricholomataceae	Panellus serotinus	Late Fall Oyster
		Tubiferaceae	Lycogala epidendrum	Wolf's Milk
		Ustilaginaceae	Ustilago maydis	Smut fungus
		Venturiaceae	Apiosporina morbosa	Black Knot
		Xylariaceae	Daldinia concentrica	King Alfred's Cake
		Xylariaceae	Ustulina deusta	Carbon Cushion
		Xylariaceae	Xylaria longipes	Dead moll's fingers
		Xylariaceae	Xylaria polymorpha	Dead Man's Fingers
	INSECTS
		Acrididae	Cholealtis conspera
		Acrididae	Chortophaga viridifasciata
		Acrididae	Dissosteria carolina
		Acrididae	Melanoplus bivatattus
		Acrididae	Melanoplus sanguinipes sanguinipes
		Acrididae	Melanoplus sp.
		Aeshnidae	Aeshna umbrosa	Shadow Darner
		Aeshnidae	Anax junius	Common Green Darner
		Andrenidae	Andrena andrenoides
		Andrenidae	Andrena canadensis
		Andrenidae	Andrena carlini
		Andrenidae	Andrena erythrogaster
		Andrenidae	Andrena hirticincta
		Andrenidae	Andrena nasonii
		Andrenidae	Andrena obscuripennis
		Andrenidae	Andrena rudbeckiae
		Andrenidae	Andrena solidaginis
		Andrenidae	Andrena sp.
		Andrenidae	Andrena thaspii
		Andrenidae	Andrena wilkella
		Andrenidae	Perdita octomaculata
		Andrenidae	Pseudopanurgus nebrascensis
		Anobiidae	Caenocara sp.
		Anobiidae	Ptilinus ruficornis
		Anthicidae	Malporus formicarius
		Anthicidae	Notoxus desertus
		Anthocoridae	Cardiastethus borealis
		Anthocoridae	Orius insidiosus
		Anthocoridae	Orius tristicolor
		Anthophoridae	Anthophora furcata
		Anthophoridae	Ceratina calcarata
		Anthophoridae	Ceratina dupla
		Anthophoridae	Ceratina sp.
		Anthophoridae	Melissodes desponsa
		Apidae	Apis mellifera
		Apidae	Bombus bimaculatus
		Apidae	Bombus borealis
		Apidae	Bombus griseocollis
		Apidae	Bombus impatiens
		Apidae	Bombus perplexus
		Apidae	Bombus rufocinctus
		Apidae	Bombus vagans
		Apidae	Ceratina mikmaqi
		Apidae	Melissodes boltoniae
		Apidae	Melissodes communis
		Apidae	Melissodes druriella
		Apidae	Melissodes illata
		Apidae	Melissodes subillata
		Apidae	Melissodes trinodis
		Apidae	Melissodes wheeleri
		Apidae	Nomada articulata
		Apidae	Nomada bethunei
		Apidae	Nomada cressonii
		Apidae	Nomada luteoloides
		Apidae	Triepeolus helianthi
		Apidae	Triepeolus nigrihirtus
		Apidae	Triepeolus obliteratus
		Apidae	Triepeolus simplex
		Apidae	Xylocopa virginiana
		Asilidae	Dioctria baumhaueri
		Asilidae	Efferia aestuans
		Asilidae	Efferia albibarbis
		Asilidae	Laphria canis
		Asilidae	Laphria canis complex
		Asilidae	Laphria cinerea
		Asilidae	Laphria flavicollis
		Asilidae	Laphria janus
		Asilidae	Laphria sicula
		Asilidae	Laphria thoracica
		Asilidae	Machimus sadyates
		Berytidae	Neoneides muticus
		Bethylidae	Parasierola sp.
		Bombyliidae	Anthrax irroratus
		Bombyliidae	Hemipenthes morio
		Bombyliidae	Hemipenthes sinuosa
		Bombyliidae	Hemipenthes webberi
		Bombyliidae	Xenox tigrinus
		Buprestidae	Agrilus sulciollis
		Byturidae	Byturus unicolor
		Caeciliidae	Caecillius sp.
		Calopterygidae	Hetaerina americana	American Rubyspot
		Cantharidae	Cantharis rufa
		Cantharidae	Chauliognathus pensylvanicus
		Cantharidae	Rhagonycha fulva
		Cantharidae	Rhaxonycha carolina
		Carabidae	Agonoleptus conjunctus
		Carabidae	Agonum fidele
		Carabidae	Agonum gratiosum
		Carabidae	Amara angustata
		Carabidae	Calleida punctata
		Carabidae	Carabus granulatus
		Carabidae	Chlaenius tricolor
		Carabidae	Colliuris pensylvanica
		Carabidae	Dyschirius setosus
		Carabidae	Elaphrus clairvillei
		Carabidae	Lebia solea
		Carabidae	Lebia viridis
		Carabidae	Platynus hypolithos
		Cerambycidae	Acalymma vittata
		Cerambycidae	Astylopsis macula
		Cerambycidae	Astylopsis sexguttata
		Cerambycidae	Bellamira scalaris
		Cerambycidae	Calligrapha californica coreopsivora
		Cerambycidae	Chaetocnema sp.
		Cerambycidae	Charidotella sexpunctata bicolor
		Cerambycidae	Chrysochus auratus
		Cerambycidae	Chrysolina hudsonica
		Cerambycidae	Cicindela punctulata punctulata
		Cerambycidae	Cicindela sexguttata
		Cerambycidae	Clytus ruricola
		Cerambycidae	Crepidodera sp.
		Cerambycidae	Deloyala guttata
		Cerambycidae	Dibolia sp.
		Cerambycidae	Epitrix sp.
		Cerambycidae	Euderces picipes
		Cerambycidae	Longitarsus sp.
		Cerambycidae	Mantura floridana
		Cerambycidae	Megacyllene robiniae
		Cerambycidae	Neoclytus acuminatus acuminatus
		Cerambycidae	Oberea tripunctata
		Cerambycidae	Obrium rufulum
		Cerambycidae	Oulema palustris
		Cerambycidae	Paria sp.
		Cerambycidae	Phyllotreta sp.
		Cerambycidae	Phymatodes amoenus
		Cerambycidae	Plagiodera versicolor
		Cerambycidae	Psylliodes punctulata
		Cerambycidae	Pyrrhalta sp.
		Cerambycidae	Systena blanda
		Cerambycidae	Tetraopes tetrophthalmus
		Cerambycidae	Trigonarthris proxima
		Cerambycidae	Trirhabda sp.
		Cerambycidae	Typocerus velutinus velutinus
		Cerambycidae	Urgleptes querci
		Cerambycidae	Xylotrechus convergens
		Cerambycidae	Xylotrechus gemellus
		Cerambycidae	Zeugophora varians
		Cercopidae	Aphrophora alni
		Cercopidae	Aphrophora cribrata
		Cercopidae	Clastoptera obtusa
		Cercopidae	Lepyronia quadrangularis
		Cercopidae	Neophilaenus lineatus
		Cercopidae	Philaenus spumarius
		Chloropidae	Chaetochlorops inquilinus
		Chloropidae	Elachiptera costata
		Chloropidae	Elachiptera nigriceps
		Chloropidae	Eribolus longulus
		Chloropidae	Thaumatomyia glabra
		Chrysididae	Cleptes semiauratus
		Chrysomelidae	Altica sp.
		Chrysomelidae	Exema canadensis
		Chrysomelidae	Helocassis clavata
		Chrysomelidae	Microrhopala vittata
		Chrysomelidae	Phyllotreta striolata
		Chrysomelidae	Psylliodes affinis
		Chrysopidae	Chrysopa oculata
		Cicadellidae	Agallia sp.
		Cicadellidae	Agalliopsis ancistra
		Cicadellidae	Agalliopsis sp.
		Cicadellidae	Anoscopus flavostrigata
		Cicadellidae	Aphrodes sp.
		Cicadellidae	Arboridia sp.
		Cicadellidae	Athysansus argentarius
		Cicadellidae	Balclutha sp.
		Cicadellidae	Ceratagallia sp.
		Cicadellidae	Cicadula melanogaster
		Cicadellidae	Colladonus clitellarius
		Cicadellidae	Cosmotettix cf. bilineatus
		Cicadellidae	Cuerna striata
		Cicadellidae	Dicraneura sp.
		Cicadellidae	Diplocolenus abdominalis
		Cicadellidae	Doratura stylata
		Cicadellidae	Draeculacephala sp.
		Cicadellidae	Elymana caduca
		Cicadellidae	Empoasca sp.
		Cicadellidae	Erasmoneura nigra
		Cicadellidae	Erythroneura sp.
		Cicadellidae	Erythroneura tricincta
		Cicadellidae	Erythroneura vitis
		Cicadellidae	Erythroneura vulnerata
		Cicadellidae	Eupteryx atropunctata
		Cicadellidae	Fieberiella florii
		Cicadellidae	Forcipata loca
		Cicadellidae	Graphocephala coccinea
		Cicadellidae	Graphocephala sp.
		Cicadellidae	Gyponana sp.
		Cicadellidae	Hymetta balteata
		Cicadellidae	Jikradia olitoria
		Cicadellidae	Latalus ocellaris
		Cicadellidae	Macrosteles sp.
		Cicadellidae	Neokolla hieroglyphica
		Cicadellidae	Osbornellus limosus
		Cicadellidae	Scaphoideus sp.
		Cicadellidae	Scaphytopius sp.
		Cicadellidae	Sorhoanus pascuellus
		Cicadellidae	Typhlocyba arsinoe
		Cicadidae	Tibicen canicularis
		Clastopteridae	Clastoptera proteus
		Cleridae	Enoclerus rosmarus
		Cleridae	Isohydnocera curtipennis
		Cleridae	Phyllobaenus verticalis
		Cleridae	Placopterus thoracicus
		Clusiidae	Clusia lateralis
		Clusiidae	Clusiodes johnsoni
		Clusiidae	Sobarocephala setipes
		Coccinellidae	Coccinella septempunctata
		Coccinellidae	Coleomegilla maculata lengi
		Coccinellidae	Didion punctatum
		Coccinellidae	Harmonia axyridis
		Coccinellidae	Hippodamia variegata
		Coccinellidae	Hyperaspis cf. binotata
		Coccinellidae	Propylea quatuordecimpunctata
		Coccinellidae	Psyllobora vigintimaculata maculata
		Coccinellidae	Scymnus sp.
		Coenagrionidae	Argia moesta	Powedered Dancer
		Coenagrionidae	Enallagma civile	Familiar Bluet
		Coenagrionidae	Enallagma ebrium	Marsh Bluet
		Coenagrionidae	Ischnura posita	Fragile Forktail
		Coenagrionidae	Ishnura verticalis	Eastern Forktail
		Colletidae	Colletes eulophi
		Colletidae	Colletes hyalinus
		Colletidae	Colletes mandibularis
		Colletidae	Colletes nudus
		Colletidae	Colletes simulans
		Colletidae	Hylaeus affinis
		Colletidae	Hylaeus cf. affinis
		Colletidae	Hylaeus ellipticus
		Colletidae	Hylaeus mesillae cressoni
		Colletidae	Hylaeus modestus
		Colletidae	Hylaeus sp.
		Conopidae	Physocephala marginata
		Corixidae	Sehirus cinctus
		Corixidae	Trichocorixa borealis
		Corixidae	Trichocorixa sexcincta
		Crabronidae	Astata unicolor
		Crabronidae	Cerceris arelate
		Crabronidae	Cerceris atramontensis
		Crabronidae	Cerceris clypeata
		Crabronidae	Crossocerus annulipes
		Crabronidae	Crossocerus elongatulus
		Crabronidae	Crossocerus tarsatus planipes
		Crabronidae	Diodontus minutus
		Crabronidae	Ectemnius cephalotes
		Crabronidae	Ectemnius continuus
		Crabronidae	Ectemnius lapidarius
		Crabronidae	Ectemnius maculosus
		Crabronidae	Ectemnius stirpicola
		Crabronidae	Gorytes atricornis
		Crabronidae	Gorytes simillimus
		Crabronidae	Hoplisoides nebulosus
		Crabronidae	Lestica confluenta
		Crabronidae	Lestica producticollis
		Crabronidae	Lyroda subita
		Crabronidae	Mimesa pauper
		Crabronidae	Oxybelus uniglumis
		Crabronidae	Passaloecus cuspidatus
		Crabronidae	Passaloecus singularis
		Crabronidae	Pemphredon inornata
		Crabronidae	Pemphredon lethifer
		Crabronidae	Philanthus bilunatus
		Crabronidae	Pison koreense
		Crabronidae	Psen monticola
		Crabronidae	Rhopalum coarctatum
		Crabronidae	Saygorytes phaleratus
		Crabronidae	Solierella peckhami
		Crabronidae	Stigmus americanus
		Crabronidae	Stigmus fraternus
		Crabronidae	Tachysphex antennatus
		Crabronidae	Tachysphex pompiliformis
		Crabronidae	Trypoxylon attenuatum
		Crabronidae	Trypoxylon carinatum
		Crabronidae	Trypoxylon clavicerum
		Crabronidae	Trypoxylon frigidum
		Crabronidae	Trypoxylon johnsoni
		Crabronidae	Trypoxylon lactitarse
		Crabronidae	Trypoxylon politum
		Crambidae	Agriphila vulgivagella	Vagabond Crambus
		Crambidae	Nomophila nearctica	Lucerne Moth
		Crambidae	Udea rubigalis	Celery Leaftier
		Culicidae	Aedes canadensis
		Culicidae	Aedes sp.
		Culicidae	Mansonia perturbans
		Curculionidae	Barypeithes pellucidus
		Curculionidae	Hylesinus aculeatus
		Curculionidae	Phyllobius oblongus
		Curculionidae	Xyleborinus saxeseni
		Curculionidae	Xyleborus dispar
		Curculionidae	Xylosandrus germanus
		Cymidae	Cymus angustatus
		Delphacidae	Delphacodes sp.
		Delphacidae	Javasella pellucida
		Delphacidae	Kosswigianella lutulenta
		Delphacidae	Megamelus lunatus
		Delphacidae	Pissonotus basalis
		Derbidae	Cedusa incisa
		Dictyopharidae	Scolops sulcipes
		Ectopsocidae	Ectopsocus meridionalis
		Elateridae	Aeolus mellillus
		Elateridae	Ampedus areolatus
		Elateridae	Athous brightwelli
		Elateridae	Hemicrepidius memnonius
		Endomychidae	Mycetina perpulchra
		Ephydridae	Athyroglossa dinorata
		Ephydridae	Athyroglossa granulosa
		Ephydridae	Axysta extera
		Ephydridae	Coenia curvicauda
		Ephydridae	Discocerina obscurella
		Ephydridae	Hyadina albovenosa
		Ephydridae	Hydrellia griseola
		Ephydridae	Hydrellia ischiaca
		Ephydridae	Nostima scutellaris
		Ephydridae	Ochthera anatolikos
		Ephydridae	Parydra aquila
		Ephydridae	Philygria debilis
		Ephydridae	Pseudohyadina longicornis
		Ephydridae	Scatella favillacea
		Ephydridae	Scatella stagnalis
		Ephydridae	Scatophila despecta
		Ephydridae	Scatophila virildella
		Erebidae	Hypena scabra	Green Cloverworm
		Erotylidae	Triplax flavicollis
		Erotylidae	Triplax thoracica
		Erotylidae	Tritoma pulchra
		Erotylidae	Tritoma sanguinipennis
		Eucnemidae	Dirrhagofarsus lewisi
		Eucnemidae	Hylis terminalis
		Eucnemidae	Isorhipis obliqua
		Eucnemidae	Microrhagus sp.
		Eucnemidae	Microrhagus subsinuata
		Eucnemidae	Microrhagus triangularis
		Flatidae	Metcalfa pruinosa
		Forficulidae	Forficula auricularia
		Formicidae	Camponotus sp.
		Formicidae	Crematogaster sp.
		Formicidae	Formica sp.
		Formicidae	Lasius sp.
		Formicidae	Leptothorax ambiguus
		Formicidae	Myrmica sp.
		Formicidae	Prenolepis imparis
		Formicidae	Tapinoma sessile
		Gelastocoridae	Gelastocoris oculatus
		Geometridae	Ecliptopera silaceata	Small Phoenix
		Geometridae	Epirrhoe alternata	White-banded Toothed Carpet
		Geometridae	Orthonama obstipata	The Gem
		Geometridae	Pleuroprucha insulsaria	Common Tan Wave
		Geometridae	Trichodezia albovittata	White-striped Black Moth
		Geometridae	Xanthorhoe ferrugata	Red Twin-Spot
		Gerridae	Aquarius remigis
		Gryllidae	Allonemobius fasciatus
		Gryllidae	Gryllus veletis
		Gryllidae	Oecanthus quadripunctatus
		Halictidae	Agapostemon radiatus
		Halictidae	Agapostemon sericeus
		Halictidae	Agapostemon virescens
		Halictidae	Augochlorella aurata
		Halictidae	Dialictus sp.
		Halictidae	Halictus confusus
		Halictidae	Halictus ligatus
		Halictidae	Halictus rubicundus
		Halictidae	Lasioglossum anomalum
		Halictidae	Lasioglossum atwoodi
		Halictidae	Lasioglossum bruneri
		Halictidae	Lasioglossum comagenense
		Halictidae	Lasioglossum cressonii
		Halictidae	Lasioglossum dreisbachi
		Halictidae	Lasioglossum ephialtum
		Halictidae	Lasioglossum fattigi
		Halictidae	Lasioglossum foxii
		Halictidae	Lasioglossum heterognathum
		Halictidae	Lasioglossum hitchensi
		Halictidae	Lasioglossum imitatum
		Halictidae	Lasioglossum leucozonium
		Halictidae	Lasioglossum lineatulum
		Halictidae	Lasioglossum macoupinense
		Halictidae	Lasioglossum michiganense
		Halictidae	Lasioglossum nigroviride
		Halictidae	Lasioglossum paradmirandum
		Halictidae	Lasioglossum pectinatum
		Halictidae	Lasioglossum pectorale
		Halictidae	Lasioglossum perpunctatum
		Halictidae	Lasioglossum pilosum
		Halictidae	Lasioglossum platyparium
		Halictidae	Lasioglossum pruinosum
		Halictidae	Lasioglossum sp. 1
		Halictidae	Lasioglossum sp. 2
		Halictidae	Lasioglossum subversans
		Halictidae	Lasioglossum tegulare
		Halictidae	Lasioglossum tenax
		Halictidae	Lasioglossum timothyi
		Halictidae	Lasioglossum versans
		Halictidae	Lasioglossum versatum
		Halictidae	Lasioglossum vierecki
		Halictidae	Lasioglossum weemsi
		Halictidae	Lasioglossum zonulum
		Halictidae	Lasioglossum zophops
		Halictidae	Sphecodes atlantis
		Halictidae	Sphecodes clematidis
		Halictidae	Sphecodes confertus
		Halictidae	Sphecodes cressonii
		Halictidae	Sphecodes davisii
		Halictidae	Sphecodes dichrous
		Halictidae	Sphecodes heraclei
		Halictidae	Sphecodes levis
		Halictidae	Sphecodes minor
		Halictidae	Sphecodes persimilis
		Halictidae	Sphecodes pycnanthemi
		Halictidae	Sphecodes sp.
		Halictidae	Sphecodes stygius
		Halictidae	Sphecodes wheeleri
		Hesperiidae	Anatrytone logan	Delaware Skipper
		Hesperiidae	Ancyloxypha numitor	Least Skipper
		Hesperiidae	Atalopedes campestris	Sachem
		Hesperiidae	Carterocephalus palaemon	Arctic Skipper
		Hesperiidae	Epargyreus clarus	Silver-spotted Skipper
		Hesperiidae	Erynnis baptisiae	Wild Indigo Duskywing
		Hesperiidae	Erynnis juvenalis	Juvenal’s Duskywing
		Hesperiidae	Erynnis lucilius	Columbine Duskywing
		Hesperiidae	Euphyes conspicua	Black Dash
		Hesperiidae	Euphyes dion	Dion Skipper
		Hesperiidae	Euphyes vestris	Dun Skipper
		Hesperiidae	Pholisora catullus	Common Sooty Wing
		Hesperiidae	Poanes hobomok	Hobomok Skipper
		Hesperiidae	Poanes massasoit	Mulberry Wing
		Hesperiidae	Poanes viator	Broad-Winged Skipper
		Hesperiidae	Polites mystic	Long Dash
		Hesperiidae	Polites origenes	Crossline Skipper
		Hesperiidae	Polites peckius	Peck's Skipper
		Hesperiidae	Polites themistocles	Tawny-edged Skipper
		Hesperiidae	Pompeius verna	Little Glassywing
		Hesperiidae	Thymelicus lineola	European Skipper
		Hesperiidae	Wallengrenia egeremet	Northern Broken-Dash
		Issidae	Acanalonia bivittata
		Kateretidae	Brachypterolus pulicarius
		Lampyridae	Ellychnia corrusca
		Lampyridae	Lucidota atra
		Lampyridae	Photinus sp.
		Lampyridae	Pyractomena sp.
		Lampyridae	Pyropyga nigricans
		Languriidae	Acropteroxys gracilis
		Lasiocampidae	Tolype velleda	Large Tolype
		Leiodidae	Anisotoma sp.
		Leiodidae	Catops sp.
		Leiodidae	Lionothus sp.
		Leiodidae	Nemadus sp.
		Leiodidae	Prionochaeta opaca
		Leiodidae	Ptomophagus sp.
		Leiodidae	Sciodrepoides fumatus terminans
		Lestidae	Lestes disjunctus	Northern Spreadwing
		Lestidae	Lestes rectangularis	Slender Spreadwing
		Leucospidae	Leucospis affinis
		Libellulidae	Erythemis simplicicollis	Eastern Pondhawk
		Libellulidae	Libellula pulchella	Twelve-spotted Skimmer
		Libellulidae	Libellula quadrimaculata	Four-Spotted Skimmer
		Libellulidae	Pachydiplax longipennis	Blue Dasher
		Libellulidae	Plathemis lydia	Common Whitetail
		Libellulidae	Sympetrum internum	Cherry faced Meadowhawk
		Libellulidae	Sympetrum obtrusum	White faced Meadowhawk
		Libellulidae	Sympetrum semicinctum	Band winged Meadowhawk
		Libellulidae	Tramea lacerat	Black Saddlebag
		Lycaenidae	Celastrina ladon	Spring Azure
		Lycaenidae	Celastrina neglecta	‘Summer’ Spring Azure
		Lycaenidae	Cupido comyntas	Eastern Tailed-Blue
		Lycaenidae	Feniseca tarquinius	Harvester
		Lycaenidae	Lycaena hyllus	Bronze Copper
		Lycaenidae	Satyirum titus	Coral Hairstreak
		Lycaenidae	Satyrium acadicum	Acadian Hairstreak
		Lycaenidae	Satyrium calanus	Banded Hairsteak
		Lycaenidae	Satyrium caryaevorus	Hickory Hairstreak
		Lycaenidae	Satyrium liparops	Striped Hairstreak
		Lygaeidae	Lygaeus kalmii
		Lygaeidae	Nysius sp.
		Lymantriidae	Dasychira basiflava	Yellow-based Tussock Moth
		Lymantriidae	Orgyia definita	Definite Tussock Moth
		Lymantriidae	Orgyia leucostigma	White-marked Tussock Moth
		Mantidae	Mantis religiosa religiosa
		Megachilidae	Anthidiellum notatum
		Megachilidae	Anthidium manicatum
		Megachilidae	Coelioxys rufitarsus
		Megachilidae	Heriades variolosa variolosa
		Megachilidae	Hoplitis pilosifrons
		Megachilidae	Hoplitis producta
		Megachilidae	Hoplitis truncata
		Megachilidae	Megachile brevis
		Megachilidae	Megachile campanulae
		Megachilidae	Megachile frigide
		Megachilidae	Megachile gemula
		Megachilidae	Megachile inermis
		Megachilidae	Megachile latimanus
		Megachilidae	Megachile lippiae
		Megachilidae	Megachile mendica
		Megachilidae	Megachile montivaga
		Megachilidae	Megachile perihirta
		Megachilidae	Megachile pugnata
		Megachilidae	Megachile relativa
		Megachilidae	Megachile rotundata
		Megachilidae	Megachile texana
		Megachilidae	Osmia coerulescens
		Megachilidae	Osmia conjuncta
		Megachilidae	Osmia proxima
		Megachilidae	Osmia pumila
		Megachilidae	Stelis lateralis
		Melandryidae	Dircaea liturata
		Melandryidae	Epicauta pensylvanica
		Meloidae	Epicauta murina
		Meloidae	Meloe impressus
		Melyridae	Collops quadrimaculata
		Membracidae	Campylenchia latipes
		Membracidae	Ceresa sp.
		Membracidae	Cyrtolobus sp.
		Membracidae	Enchenopa binotata
		Membracidae	Entylia carinata
		Membracidae	Micrutalis calva
		Membracidae	Publilia concava
		Membracidae	Telamona decorata
		Mesopsocidae	Mesopsocus unipunctatus
		Micropezidae	Compsobata univitta
		Micropezidae	Rainieria antennaepes
		Miridae	Adelphocoris lineolatus
		Miridae	Amblytylus nasutus
		Miridae	Capsus ater
		Miridae	Ceratocapsus sp.
		Miridae	Chlamydatus sp.
		Miridae	Criocoris saliens
		Miridae	Deraeocoris sp.
		Miridae	Halticus sp.
		Miridae	Heterocordylus malinus
		Miridae	Leptopterna dolabrata
		Miridae	Litomiris sp.
		Miridae	Lopidea sp.
		Miridae	Lygidea sp.
		Miridae	Lygus sp.
		Miridae	Nabicula subcoleoptrata
		Miridae	Nabis roseipennis
		Miridae	Neolygus sp.
		Miridae	Orthocephalus sp.
		Miridae	Pagasa fusca
		Miridae	Paraproba capitata
		Miridae	Phytocoris sp.
		Miridae	Pithanus maerkelii
		Miridae	Plagiognathus sp.
		Miridae	Poecilocapsus lineatus
		Miridae	Prepops sp.
		Miridae	Slaterocoris sp.
		Miridae	Stenodema trispinosa
		Miridae	Stenodema vicinum
		Miridae	Stenotus binotatus
		Miridae	Taedia sp.
		Mordellidae	Mordellina infima
		Mordellidae	Mordellistena andreae
		Mordellidae	Mordellistena bifasciata
		Mordellidae	Mordellistena cervicalis
		Mordellidae	Mordellistena cf. lutea
		Mordellidae	Mordellistena ornata
		Mordellidae	Mordellistena picilabris
		Mordellidae	Mordellistena sp.
		Mordellidae	Mordellochroa scapularis
		Mordellidae	Paramordellaria triloba
		Mordellidae	Tomoxia lineela
		Mutillidae	Myrmosa unicolor
		Mutillidae	Pseudomethoca frigida
		Mycetophilidae	Paratinia recurva
		Mycetophilidae	Symmerus lautus
		Nabidae	Nabis rufusculus
		Nitidulidae	Carpophilus sayi
		Nitidulidae	Conotelus obscurus
		Nitidulidae	Glischrochilus fasciatus
		Nitidulidae	Glischrochilus quadrisiginatus
		Nitidulidae	Omosita colon
		Noctuidae	Agrotis ipsilon	Ipsilon Dart
		Noctuidae	Agrotis venerabilis	Venerable Dart
		Noctuidae	Autographa precationis	Common Looper
		Noctuidae	Chrysodeixis includens	Soybean Looper
		Noctuidae	Idia aemula	Common Idia
		Noctuidae	Lacinipolia renigera	Bristly Cutworm
		Noctuidae	Leucania multilinea	Many-lined Wainscot
		Noctuidae	Meropleon diversicolor	Multicolored Sedgeminer
		Noctuidae	Mythimna unipuncta	The White-speck
		Noctuidae	Noctua pronuba	Large Yellow Underwing
		Noctuidae	Ochropleura implecta	Flame-shouldered Dart
		Noctuidae	Peridroma saucia	Pearly Underwing (Variegated Cutworm)
		Nymphalidae	Aglais milberti	Milbert’s Tortoiseshell
		Nymphalidae	Asterocampa clyton	Tawny Emperor
		Nymphalidae	Boloria Bellona	Meadow Fritillary
		Nymphalidae	Boloria selene	Silver-Bordered Fritillary
		Nymphalidae	Cercyonis pegala	Common Wood-Nymph
		Nymphalidae	Chlosyne nycteis	Silvery Checkerspot
		Nymphalidae	Coenonympha tullia	Inornate Ringlet
		Nymphalidae	Danaus plexippus	Monarch
		Nymphalidae	Euphydryas phaeton	Baltimore Checkerspot
		Nymphalidae	Euptoieta claudia	Variegated Fritillary
		Nymphalidae	Junonia coenia	Common Buckeye
		Nymphalidae	Lethe anthedon	Northern Pearly-eye
		Nymphalidae	Lethe appalachia	Appalachian Brown
		Nymphalidae	Lethe eurydice	Eyed Brown
		Nymphalidae	Libytheana carinenta	American Snout
		Nymphalidae	Limenitis archippus	Viceroy
		Nymphalidae	Limenitis arthemis	White Admiral
		Nymphalidae	Megisto cymela	Little Wood-Satyr
		Nymphalidae	Nymphalis antiopa	Mourning Cloak
		Nymphalidae	Nymphalis l-album	Compton Tortoiseshell
		Nymphalidae	Phyciodes cocyta	Northern Crescent
		Nymphalidae	Phyciodes tharos	Pearl Crescent
		Nymphalidae	Polygonia comma	Eastern Comma
		Nymphalidae	Polygonia interrogationis	Question Mark
		Nymphalidae	Polygonia progne	Grey Comma
		Nymphalidae	Speyeria Cybele	Great Spangled Fritillary
		Nymphalidae	Vanessa atalanta	Red Admiral
		Nymphalidae	Vanessa cardui	Painted Lady
		Nymphalidae	Vanessa virginiensis	American Lady
		Oxycarenidae	Crophius disconotus
		Panorpidae	Panorpa galerita
		Panorpidae	Panorpa latipennis
		Panorpidae	Panorpa subfurcata
		Papilionidae	Papilio cresphontes	Giant Swallowtail
		Papilionidae	Papilio glaucus	Eastern Tiger Swallowtail
		Papilionidae	Papilio polyxenes	Black Swallowtail
		Pedilidae	Pedilus lugubris
		Pentatomidae	Acrosternum hilare
		Pentatomidae	Banasa calva
		Pentatomidae	Banasa dimidiata
		Pentatomidae	Brochymena quadripustulata
		Pentatomidae	Cosmopepla lintneriana
		Pentatomidae	Euschistus tristigmus luridus
		Pentatomidae	Parabrochymena arborea
		Pentatomidae	Picromerus bidens
		Pentatomidae	Podisus maculiventris
		Peripsocidae	Peripsocus subfasciatus
		Phoridae	Megaselia citrinella
		Phymatidae	Phymata americana
		Phymatidae	Piesma cinerum
		Pieridae	Colias eurytheme	Orange Sulphur
		Pieridae	Colias philodice	Clouded Sulphur
		Pieridae	Pieris oleracea	Mustard White
		Pieridae	Pieris rapae	Cabbage White
		Pieridae	Pyrisitia lisa	Little Yellow
		Plutellidae	Plutella xylostella	Diamond-back Moth
		Pompilidae	Agenioideus cinctellus
		Pompilidae	Agenioideus humilis
		Pompilidae	Anoplius imbellis
		Pompilidae	Anoplius nigerrimus
		Pompilidae	Anoplius virginiensis
		Pompilidae	Aporinellus wheeleri
		Pompilidae	Arachnospila michiganensis michiganensis
		Pompilidae	Auplopus carbonarius
		Pompilidae	Auplopus mellipes variitarsatus
		Pompilidae	Auplopus nigrellus
		Pompilidae	Caliadurgus fasciatellus alienatus
		Pompilidae	Dipogon sayi sayi
		Pompilidae	Episyron biguttatus biguttatus
		Pompilidae	Priocnemis cornica
		Pompilidae	Priocnemis germana
		Pompilidae	Priocnemis minorata
		Pompilidae	Priocnemis notha notha
		Pompilidae	Priocnemis scitula relicta
		Psilidae	Loxocera cylindrica
		Psilidae	Psila persimilis
		Psocidae	Blaste opposita
		Psocidae	Metylophorus novaescotiae
		Psyllidae	Pachypsylla celtidismamma
		Psyllidae	Psyllopsis fraxinicola
		Pterophoridae	Gillmeria pallidactyla	Yarrow Plume Moth
		Ptilodactylidae	Ptilodactyla sp.
		Pyrochroidae	Dendroides canadensis
		Pyrochroidae	Schizotus cervicalis
		Reduviidae	Empicornis errabundus
		Reduviidae	Zelus luridus
		Reduviidae	Zelus tetracanthus
		Rhagionidae	Chrysopilus thoracicus
		Rhipiphoridae	Pelecotoma flavipes
		Rhopalidae	Arhyssus sp.
		Rhopalidae	Harmostes reflexulus
		Rhopalidae	Stictopleurus punctiventris
		Rhyparochromidae	Ligyrocoris diffusus
		Rhyparochromidae	Megalonotus sabulicola
		Rhyparochromidae	Sphragisticus nebulosus
		Ripiphoridae	Ripiphorus fasciatus
		Saldidae	Saldula confluenta
		Saldidae	Saldula pallipes
		Saldidae	Saldula saltatoria
		Scarabaeidae	Ataenius strigatus
		Scarabaeidae	Onthophagus orpheus canadensis
		Scarabaeidae	Osmoderma scabra
		Scarabaeidae	Popillia japonica
		Scarabaeidae	Rhyssemus germanus
		Scarabaeidae	Trox scabrosus
		Scathophagidae	Parallelomma vittatum
		Sciomyzidae	Poecilographa decorum
		Scolytidae	Hylurgopinus rufipes
		Scolytidae	Scolytus mali
		Scolytidae	Xyleborus sayi
		Scraptiidae	Anaspis rufa
		Scraptiidae	Canifa pallipes
		Sepsidae	Nemopoda nitidula
		Sepsidae	Saltella sphondylii
		Sierolomorphidae	Sierolomorpha canadensis
		Silphidae	Nicrophorus orbicollis
		Silphidae	Oiceoptoma inaequale
		Sphaeroceridae	Apteromyia claviventris
		Sphaeroceridae	Coproica acutangula
		Sphaeroceridae	Coproica ferruginata
		Sphaeroceridae	Copromyza equina
		Sphaeroceridae	Gonioneura spinipennis
		Sphaeroceridae	Ischiolepta pusilla
		Sphaeroceridae	Leptocera caenosa
		Sphaeroceridae	Leptocera erythrocera
		Sphaeroceridae	Lotophila atra
		Sphaeroceridae	Minilimosina fungicola
		Sphaeroceridae	Opalimosina mirabilis
		Sphaeroceridae	Pullimosina heteroneura
		Sphaeroceridae	Pullimosina longicosta
		Sphaeroceridae	Pullimosina pullula
		Sphaeroceridae	Rachispoda fumipennis-group
		Sphaeroceridae	Rachispoda limosa
		Sphaeroceridae	Rachispoda lutosa-group
		Sphaeroceridae	Sclerocoelus sordipes
		Sphaeroceridae	Spelobia bifrons
		Sphaeroceridae	Spelobia clunipes
		Sphaeroceridae	Spelobia luteilabris
		Sphaeroceridae	Spelobia ochripes
		Sphaeroceridae	Spelobia semioculata
		Sphaeroceridae	Sphaerocera curvipes
		Sphaeroceridae	Trachyopella nuda
		Sphecidae	Chalybion californicum
		Sphecidae	Isodontia auripes
		Sphecidae	Isodontia mexicana
		Sphecidae	Sceliphron caementarium
		Sphecidae	Sphex ichneumoneus
		Stratiomyidae	Allognosta fuscitarsis
		Stratiomyidae	Allognosta obscuriventris
		Stratiomyidae	Caloparyphus tetraspilus
		Stratiomyidae	Euparyphus stigmaticalis
		Stratiomyidae	Microchrysa polita
		Stratiomyidae	Nemotelus centralis
		Stratiomyidae	Psellidotus meganticus
		Stratiomyidae	Ptecticus gigliotosi
		Stratiomyidae	Sargus decorus
		Stratiomyidae	Stratiomys norma
		Stratiomyidae	Stratiomys obesa
		Synchroidae	Synchroa punctata
		Syrphidae	Allograpta micrura
		Syrphidae	Allograpta obliqua
		Syrphidae	Chalcosyrphus nemorum
		Syrphidae	Chrysotoxum pubescens
		Syrphidae	Epistrophe nitidicollis
		Syrphidae	Eristalis arbustorum
		Syrphidae	Eristalis dimidiata
		Syrphidae	Eristalis flavipes
		Syrphidae	Eristalis stipator
		Syrphidae	Eristalis tenax
		Syrphidae	Eristalis transversa
		Syrphidae	Eumerus sp.
		Syrphidae	Eupeodes americanus
		Syrphidae	Eupeodes volucris
		Syrphidae	Helophilus fasciatus
		Syrphidae	Heringia salax
		Syrphidae	Mallota posticata
		Syrphidae	Melanotstoma mellinum
		Syrphidae	Merodon equestris
		Syrphidae	Microdon tristis
		Syrphidae	Ocyptamus fuscipennis
		Syrphidae	Orthonevra nitida
		Syrphidae	Paragus haemorrhous
		Syrphidae	Parhelophilus laetus
		Syrphidae	Platycheirus hyperboreus
		Syrphidae	Platycheirus quadratus
		Syrphidae	Platycheirus scambus
		Syrphidae	Sphaerophoria asymmetrica
		Syrphidae	Sphaerophoria bifurcata
		Syrphidae	Sphaerophoria brevipilosa
		Syrphidae	Sphaerophoria contigua
		Syrphidae	Sphaerophoria philanthus
		Syrphidae	Sphegina petiolata
		Syrphidae	Spilomyia longicornis
		Syrphidae	Syritta pipiens
		Syrphidae	Syrphus rectus
		Syrphidae	Syrphus ribesii
		Syrphidae	Toxomerus geminatus
		Syrphidae	Toxomerus marginatus
		Syrphidae	Xylota quadrimaculata
		Tabanidae	Chrysops aestuans
		Tabanidae	Chrysops calvus
		Tabanidae	Chrysops lateralis
		Tabanidae	Chrysops striatus
		Tabanidae	Hybomitra epistates
		Tabanidae	Hybomitra lasiophthalma
		Tabanidae	Tabanus lineola
		Tephritidae	Euaresta bella
		Tephritidae	Eurosta solidaginis
		Tephritidae	Eutreta novaeboracensis
		Tephritidae	Urophora cardui
		Tephritidae	Xanthomyia platyptera
		Tetrigidae	Tetrix arenonsum angusta
		Tetrigidae	Tetrix subulata
		Tetrigoniidae	Conocephalus brevipennis
		Tetrigoniidae	Scudderia sp.
		Throscidae	Aulonothroscus sp.
		Throscidae	Trixagus carinicollis
		Throscidae	Trixagus chevrolati
		Thyreocoridae	Corimelaena pulicaria
		Thyreocoridae	Galgupha atra
		Tingidae	Corythucha marmorata
		Tingidae	Corythucha sp.
		Tingidae	Dictyla echii
		Trogossitidae	Tenebroides corticalis
		Vespidae	Ancistrocerus adiabatus adiabatus
		Vespidae	Ancistrocerus albophaleratus
		Vespidae	Ancistrocerus antilope antilope
		Vespidae	Ancistrocerus campestris
		Vespidae	Ancistrocerus catskill
		Vespidae	Ancistrocerus unifasciatus unifasciatus
		Vespidae	Eumenes crucifer
		Vespidae	Eumenes fraternus
		Vespidae	Euodynerus foraminatus foraminatus
		Vespidae	Euodynerus leucomelas leucomelas
		Vespidae	Monobia quadridens
		Vespidae	Parancistrocerus leionotus
		Vespidae	Parancistrocerus pedestris
		Vespidae	Parancistrocerus pensylvanicus pensylvanicus
		Vespidae	Polistes dominula
		Vespidae	Polistes fuscatus
		Vespidae	Symmorphus canadensis
		Vespidae	Symmorphus cristatus
		Vespidae	Vespula flavopilosa
		Vespidae	Vespula maculifrons
		Vespidae	Vespula vidua
		Vespidae	Vespula vulgaris
		Xylomyidae	Macroceromys terminalis
		Xylomyidae	Solva pallipes
		Xylomyidae	Xylomyia americana
		Xylomyidae	Xylomyia simillima
		Xylomyidae	Xylomyia tenthredinoides
		Xylophagidae	Xylophagus reflectens
	LICHENS
		Arthoniaceae	Arthonia radiata	Asterisk lichen
		Physciaceae	Buellia stillingiana	Common Button lichen
		Candelariaceae	Candelaria concolor	Candleflame Lichen
		Candelariaceae	Candelariella efflorescens	Powdery Goldspeck lichen
		Graphidaceae	Graphis scripta	Script lichen
		Parmeliaceae	Flavoparmelia caperata	Common Greenshield lichen
		Parmeliaceae	Parmelia squarrosa	Bottlebrush lichen
		Parmeliaceae	Punctelia subrudecta	Forest Speckleback lichen
		Phlyctidaceae	Phlyctis spp.	Whitewash lichens
		Physciaceae	Physcia adscendens	Hooded Rosette lichen
		Physciaceae	Physcia millegrana	Mealy Rosette lichen
		Physciaceae	Buellia punctata	Tiny Button lichen
		Physciaceae	Phaeophyscia rubropulchra	Orange Cored Shadow lichen
		Physciaceae	Physcia aipolia	Hoary Rosette lichen
		Physciaceae	Physcia stellaris	Star Rosette lichen
		Ramalinaceae	Bacidia schweinitzii	Surprise lichen
		Stereocaulaceae	Lepraria incana	Dust lichen
		Stereocaulaceae	Lepraria lobificans	Fluffy Dust/Green Speckled Dust lichen
		Stictidaceae	Conotrema urceolatum	Can-of-Worms lichen
		Trapeliaceae	Trapelia involuta	Pebble Lichen
			Unknown	Sterile Black Crust
	LIVERWORTS
		Aneuraceae	Aneura pinguis	Grease Wort
		Aytoniaceae	Reboulia hemisphaerica	Hemisphaeric Liverwort
		Conocephalaceae	Conocephalum conicum	Snakeskin Liverwort
		Frullaniaceae	Frullania eboracensis
		Geocalycaceae	Lophocolea heterophylla	Variable Leaved Crestwort
		Marchantiaceae	Marchantia polymorpha	Common Liverwort, Umbrella Liverwort
		Porellaceae	Porella platyphylla	Wall Scalewort
		Radulaceae	Radula complanata	Even Scalewort
	MAMMALS
		Erethizontidae	(Erethizon dorsatus)	Porcupine
		Leporidae	(Lepus americanus)	Snowshoe Hare
		Muridae	(Mus musculus)	House Mouse
		Sciuridae	(Glaucomys sabrinus)	Northern Flying Squirrell
		Canidae	Canis latrans	Coyote
		Canidae	Vulpes vulpes	Red Fox
		Castoridae	Castor canadensis	Beaver
		Cervidae	Odocoileus virginianus	White-Tailed Deer
		Cricetidae	Microtus pennsylvanicus	Meadow Vole
		Cricetidae	Myodes gapperi	Southern Red-backed vole
		Cricetidae	Ondatra zibethicus	Muskrat
		Cricetidae	Peromyscus leucopus	White-Footed Mouse
		Cricetidae	Peromyscus maniculatus	Deer Mouse
		Didelphidae	Didelphis virginiana	Virgina Opossum
		Dipodidae	Zapus hudsonius	Meadow Jumping Mouse
		Felidae	Lynx rufus	Bobcat
		Leporidae	Lepus europaeus	European Hare
		Leporidae	Sylvilagus floridanus	Eastern Cottontail
		Mephitidae	Mephitis mephitis	Striped Skunk
		Muridae	Rattus norvegicus	Norway Rat
		Mustelidae	Lontra canadensis	North American River Otter
		Mustelidae	Mustela erminea	Ermine/ Short tailed Weasel
		Mustelidae	Neovison vison	Mink
		Procyonidae	Procyon lotor	Raccoon
		Sciuridae	Marmota monax	Woodchuck/ Groundhog
		Sciuridae	Sciurus carolinensis	Gray Squirrel
		Sciuridae	Tamias striatus	Eastern Chipmunk
		Sciuridae	Tamiasciurus hudsonicus	Red Squirrel
		Soricidae	Blarina brevicauda	Northern Short-tailed Shrew
		Soricidae	Sorex cinereus	Masked (Common) Shrew
		Soricidae	Sorex fumeus	Smokey Shrew
		Talpidae	Condylura cristata	Star-nosed Mole
		Vespertilionidae	Eptesicus fuscus	Big Brown Bat
		Vespertilionidae	Lasionycteris noctivagans	Silver-haired Bat
		Vespertilionidae	Lasiurus borealis	Eastern Red Bat
		Vespertilionidae	Myotis lucifugus	Little Brown Bat
		Vespertilionidae	Myotis septentrionalis	Northern Long-eared Bat
	MOSSES
		Amblystegiaceae	Amblystegium serpens	Creeping Feather Moss
		Amblystegiaceae	Amblystegium varium	Willow Feather Moss
		Amblystegiaceae	Campylium chrysophyllum	Golden Feather Moss
		Amblystegiaceae	Campylium hispidulum	Campylium Moss
		Amblystegiaceae	Campylium spp.	Campylium Moss
		Amblystegiaceae	Hygroamblystegium fluviatile	Streamside Hygroamblystegium Moss
		Amblystegiaceae	Hygroamblystegium tenax	Hygroamblystegium Moss
		Amblystegiaceae	Leptodictyum riparium	Kneiff's Feather Moss
		Amblystegiaceae	Drepanocladus aduncus	Kneiff's Hook Moss
		Anomodontaceae	Anomodon attenuatus	Slender Tail Moss
		Anomodontaceae	Anomodon rostratus	Anomodon Moss
		Brachytheciaceae	Brachythecium spp.	Brachythecium moss
		Brachytheciaceae	Cirriphyllum piliferum	Hair Pointed Feather Moss
		Brachytheciaceae	Eurhynchium hians	Swartz's Feather-moss
		Brachytheciaceae	Eurhynchium pulchellum	Elegant Feather-moss
		Bryaceae	Bryum caespiticium	Tufted Thread Moss
		Bryaceae	Bryum argenteum	Silver Moss
		Climaciaceae	Climacium americanum	American Climacium Moss
		Climaciaceae	Climacium dendroides	Tree Moss
		Dicranaceae	Dicranum flagellare	Whip Fork Moss
		Dicranaceae	Dicranum montanum	Mountain Fork Moss
		Ditrichaceae	Ceratodon purpureus	Redshank
		Ditrichaceae	Ditrichum spp.	Ditrichum Moss
		Encalyptaceae	Encalypta procera	Candle Snuffer Moss
		Entodontaceae	Entodon seductrix	Seductive Entodon Moss
		Fissidentaceae	Fissidens adianthoides	Maidenhair Pocket-moss
		Fissidentaceae	Fissidens taxifolius	Common Pocket Moss
		Fissidentaceae	Fissidens spp.	Fissidens Moss
		Fontinalaceae	Fontinalis hypnoides	Fontinalis Moss
		Grimmiaceae	Schistidium apocarpa	Schistidium Moss
		Grimmiaceae	Schistidium rivulare	River Grimmia
		Hedwigiaceae	Hedwigia ciliata	Fringed Hoar Moss
		Hylocomiaceae	Rhytidiadelphus triquetrus	Big Shaggy Moss
		Hypnaceae	Callicladium haldanianum	Callicladium Moss
		Hypnaceae	Homomallium adnatum	Homomallium Moss
		Hypnaceae	Hypnum curvifolium	Curevleaf Hypnum Moss
		Hypnaceae	Hypnum imponens	Pellucid Plait-moss
		Hypnaceae	Hypnum lindbergii	Lindberg's Plait-moss
		Hypnaceae	Hypnum spp.	Hypnum Moss
		Hypnaceae	Platydictya subtilis	Platydictya Moss
		Hypnaceae	Taxiphyllum deplanatum	Taxiphyllum Moss
		Leskeaceae	Leskea polycarpa	Many Fruited Leskea
		Leskeaceae	Leskeella nervosa	Nerved Leskea
		Leucobryaceae	Leucobryum glaucum	Large White Moss
		Meesiaceae	Leptobryum pyriforme	Golden Thread Moss
		Mniaceae	Mnium marginatum	Bordered Thyme Moss
		Orthotrichaceae	Orthotrichum anomalum	Anomalous Bristle Moss
		Plagiomniaceae	Plagiomnium cuspidatum	Woodsy Thyme Moss
		Plagiotheciaceae	Isopterygiopsis muelleriana	Mueller's Silk Moss
		Polytrichaceae	Atrichum angustatum	Lesser Smoothcap
		Polytrichaceae	Atrichum undulatum	Common Smoothcap
		Polytrichaceae	Polytrichum spp.	Haircap Moss
		Pottiaceae	Barbula convoluta	Lesser Bird's Claw Beard Moss
		Pottiaceae	Desmatodon obtusifolius	Obtuseleaf Desmatodon Moss
		Pottiaceae	Hymenostylium recurvirostre	Hymenostylium Moss
		Pottiaceae	Tortella tortuosa	Frizzled Crisp Moss
		Pottiaceae	Barbula unguiculata	Bird's Claw Beard Moss
		Pottiaceae	Tortula ruralis	Great Hairy Screw Moss
		Pottiaceae	Weissia spp.	Controverial Weissia Moss
		Sphagnaceae	Sphagnum spp.	Bog Moss
		Tetraphidaceae	Tetraphis pellucida	Pellucid Four Tooth Moss
		Thuidiaceae	Thuidium recognitum	Lesser Tamarisk Moss
		Thuidiaceae	Thuidium delicatulum	Delicate Tamarisk Moss
	PLANTS
		Adoxaceae	(Viburnum lantana)	Bending Wayfaring-tree
		Alismataceae	(Sagittaria latifolia)	Broad-leaved Arrowhead
		Amaranthaceae	(Amaranthus albus)	White Tumbleweed
		Amaranthaceae	(Amaranthus retroflexus)	Green Amaranth
		Anacardiaceae	(Rhus aromatica)	Fragrant Sumac
		Anacardiaceae	(Toxicodendron radicans var. rydbergii)	Western Poison-Ivy
		Anacardiaceae	(Toxicodendron vernix)	Poison Sumac
		Annonaceae	[Asimina triloba]	Pawpaw
		Apiaceae	(Thaspium trifoliatum var. aureum)	Purple Meadow Parsnip
		Apiaceae	[Sanicula canadensis var. grandis]	Long-styled Canada Snakeroot
		Araliaceae	(Aralia elata)	Sarsaparilla
		Araliaceae	(Hydrocotyle americana)	American Marsh-pennywort
		Asclepiadaceae	(Asclepias incarnata spp. incarnata)	Swamp Milkweed
		Aspleniaceae	(Asplenium viride)	Green Spleenwort
		Asteraceae	(Artemisia vulgaris)	Common Mugwort
		Asteraceae	(Bidens cernua)	Stick-tight
		Asteraceae	(Bidens vulgata)	Tall Beggarticks
		Asteraceae	(Carduus nutans)	Musk Thistle
		Asteraceae	(Centaurea stoebe spp. micranthos)	Spotted Knapweed
		Asteraceae	(Cirsium pumilum var. hilii)	Hill's Thistle
		Asteraceae	(Eutrochium purpureum var. purpureum)	Sweet-Scented Joe-Pye-Weed
		Asteraceae	(Helenium flexuosum)	Purple headed Sneezeweed
		Asteraceae	(Helianthus annuus)	Common Sunflower
		Asteraceae	(Helianthus tuberosus)	Jerusalem Artichoke
		Asteraceae	(Hieracium umbellatum)	Canadian Hawkweed
		Asteraceae	(Hieracium vulgatum)	Common Hawkweed
		Asteraceae	(Matricaria discoidea)	Pineapple Weed
		Asteraceae	(Onopordum acanthium)	Scotch Thistle
		Asteraceae	(Packera aurea)	Golden Ragwort
		Asteraceae	(Pilosella piloselloides spp. piloselloides)	Tall Hawkweed
		Asteraceae	(Pilosella piloselloides spp. praealta)	Glaucos King Devil
		Asteraceae	(Solidago ulmifolia)	Elm leafed Goldenrod
		Asteraceae	(Sonchus asper)	Spiny-leaved Sow-thistle
		Asteraceae	(Symphyotrichum novi-belgii)	New York Aster
		Betulaceae	(Betula pendula)	European White Birch
		Betulaceae	(Betula populifolia)	Gray Birch
		Boraginaceae	(Anchusa arvensis)	Small Bugloss
		Boraginaceae	(Cynoglossum officinale)	Common Hound's-tongue
		Boraginaceae	[Lithospermum parviflorum]	Soft Hairy False Gromwell
		Brassicaceae	(Berteroa incana)	Hoary Alyssum
		Brassicaceae	(Brassica juncea)	Indian Mustard
		Brassicaceae	(Erysimum cheiranthoides)	Treacle-mustard
		Brassicaceae	(Rorippa palustris spp. palustris)	Marsh Yellow-cress
		Brassicaceae	(Sinapis alba)	White Mustard
		Brassicaceae	(Sisymbrium altissimum)	Tall Tumble-mustard
		Campanulaceae	(Campanula rapunculoides)	Creeping Bellflower
		Campanulaceae	(Campanula rotundifolia)	Blue Bells of Scotland
		Caprifoliaceae	(Linnaea borealis spp. longiflora)	Twinflower
		Caprifoliaceae	(Sambucus nigra)	European Elderberry
		Caprifoliaceae	(Symphoricarpos albus)	Snowberry
		Caprifoliaceae	(Symphoricarpos occidentalis)	Wolfberry
		Caprifoliaceae	(Triosteum aurantiacum)	Wild Coffee
		Caryophyllaceae	(Arenaria serpyllifolia)	Thyme-leaved Sandwort
		Caryophyllaceae	(Dianthus barbatus)	Sweet William
		Caryophyllaceae	(Stellaria graminea)	Common Stitchwort
		Celastraceae	(Celastrus scandens)	Climbing Bittersweet
		Cucurbitaceae	(Sicyos angulatus)	Bur Cucumber
		Cyperaceae	(Carex aquatilis)	Aquatic Sedge
		Cyperaceae	(Carex arctata)	Drooping Wood Sedge
		Cyperaceae	(Carex blanda)	Woodland Sedge
		Cyperaceae	(Carex bromoides)	Bromelike Sedge
		Cyperaceae	(Carex comosa)	Longhair Sedge
		Cyperaceae	(Carex cristatella)	Crested Sedge
		Cyperaceae	(Carex eburnea)	Bristle-leaved Sedge
		Cyperaceae	(Carex formosa)	Handsome Sedge
		Cyperaceae	(Carex glaucodea)	Blue Sedge
		Cyperaceae	(Carex lupulina)	Hop Sedge
		Cyperaceae	(Carex retrorsa)	Retrorse Sedge
		Cyperaceae	(Carex tonsa var. rugosperma)	Parachute Sedge
		Cyperaceae	(Dulichium arundinaceum)	Reed-like Three-way Sedge
		Cyperaceae	(Schoenoplectus tabernaemontani)	American Great Bulrush
		Cyperaceae	[Carex lupuliformis]	Hop-like Sedge
		Cyperaceae	[Schoenoplectiella smithii var. smithii]	Smith's Club-rush
		Elaeagnaceae	(Shepherdia canadensis)	Buffalo Berry
		Equisetaceae	(Equisetum sylvaticum)	Wood Horsetail
		Fabaceae	(Amorpha canescens)	Leadplant
		Fabaceae	(Medicago sativa spp. sativa)	Alfalfa
		Fabaceae	(Melilotus albus)	White Sweet-clover
		Fabaceae	(Trifolium campestre)	Large Hop Clover
		Fabaceae	(Trifolium repens)	White Clover
		Fabaceae	[Glycyrrhiza lepidota]	Wild Licorice
		Fagaceae	(Quercus bicolor)	Swamp White Oak
		Gentianaceae	(Gentiana rubricaulis)	Purple-stemmed Gentian
		Gentianaceae	(Gentianella quinquefolia spp. quinquefolia)	Stiff Gentian
		Gentianaceae	(Gentianopsis crinita)	Fringed Gentian
		Grossulariaceae	(Ribes glandulosum)	Skunk Currant
		Grossulariaceae	(Ribes oxyacanthoides var. oxycanthoides)	Bristly Wild Gooseberry
		Hydrangeaceae	(Philadelphus coronarius)	Sweet Mock Orange
		Iridaceae	(Sisyrinchium montanum)	Common Blue-eyed Grass
		Juncaceae	(Juncus articulatus)	Jointed Rush
		Juncaceae	(Juncus brachycarpus)	Short-fruited Rush
		Juncaceae	(Juncus bufonius)	Toad Rush
		Juncaceae	(Juncus dudleyi)	Dudley's Rush
		Juncaceae	(Juncus effusus)	Soft Rush
		Juncaceae	(Juncus nodosus)	Knotted Rush
		Juncaceae	(Luzula multiflora spp. multiflora)	Woodrush
		Juncaceae	[Juncus acuminatus]	Sharp-fruited Rush
		Lamiaceae	(Agastache nepetoides)	Yellow Giant Hyssop
		Lamiaceae	(Ajuga reptans)	Creeping Bugleweed
		Lamiaceae	(Lamium amplexicaule)	Common Henbit
		Lamiaceae	(Mentha spicata)	Spear Mint
		Lamiaceae	(Stachys palustris)	Hedge-nettle
		Lamiaceae	[Monarda didyma]	Oswego-tea
		Liliaceae	(Hemerocallis fulva)	Orange Day-lily
		Liliaceae	(Hemerocallis lilioasphodelus)	Lemon Day-lily
		Liliaceae	(Lilium michiganense)	Michigan Lily
		Liliaceae	(Lilium superbum)	Turk's Cap Lily
		Liliaceae	(Polygonatum biflorum)	Solomon's Seal
		Liliaceae	(Trillium spp.)	Trillium species
		Linaceae	[Linum virginianum]	Wild Yellow Flax
		Malvaceae	(Abutilon theophrasti)	Velvet-leaf
		Malvaceae	(Malva moschata)	Musk Mallow
		Moraceae	(Morus alba)	White Mulberry
		Najadaceae	(Najas flexilis)	Slender Najas
		Onagraceae	(Epilobium coloratum)	Purple-veined Willow-herb
		Onagraceae	(Epilobium strictum)	Soft Willow-herb
		Onagraceae	(Ludwigia polycarpa)	Many-fruited False Loosestrife
		Onagraceae	(Oenothera serrulata)	Tooth-leaved Primrose
		Orchidaceae	(Aplectrum hyemale)	Putty-root
		Orchidaceae	(Cypripedium acaule)	Pink Lady's Slipper
		Orchidaceae	(Platanthera dilatata)	Tall White Northern Orchid
		Orchidaceae	(Platanthera hyperborea)	Tall Leafy Green Orchis
		Orchidaceae	(Spiranthes lucida)	Shining Ladies' Tresses
		Orchidaceae	[Cypripedium arietinum]	Ram's-head Lady's Slipper
		Osmundaceae	(Osmunda regalis var. spectabilis)	Royal Fern
		Oxalidaceae	(Oxalis corniculata)	Creeping Wood-sorrel
		Oxalidaceae	(Oxalis montana)	Mountain Woodsorrel
		Phytolaccaceae	(Phytolacca americana var. americana)	American Pokeweed
		Pinaceae	(Larix decidua)	European Larch
		Pinaceae	(Picea pungens)	Blue Spruce
		Pinaceae	(Pinus banksiana)	Jack Pine
		Plantaginaceae	(Digitalis lanata)	Grecian Foxglove
		Plantaginaceae	(Digitalis purpurea)	Purple Foxglove
		Plantaginaceae	(Plantago rugelii)	Rugel's Plantain
		Poaceae	(Agrostis capillaris)	Colonial Bentgrass
		Poaceae	(Agrostis gigantea)	Red-top
		Poaceae	(Agrostis stolonifera)	Creeping Bentgrass
		Poaceae	(Brachyelytrum erectum)	Bearded Short-husk
		Poaceae	(Danthonia spicata)	Poverty Oat Grass
		Poaceae	(Dichanthelium dichotomum var. dichotomum)	Forked Panic Grass
		Poaceae	(Eleusine indica)	Wiregrass
		Poaceae	(Elymus lanceolatus spp. psammophilus)	Streambank Wildrye
		Poaceae	(Elymus virginicus var. virginicus)	Virginia Wild Rye
		Poaceae	(Glyceria maxima)	Sweet Reed Grass
		Poaceae	(Lolium perenne)	English Rye Grass
		Poaceae	(Muhlenbergia tenuiflora)	Slender Satin Grass
		Poaceae	(Oryzopsis asperifolia)	White-grained Mountain-rice
		Polemoniaceae	[Phlox subulata spp. subulata]	Moss Phlox
		Polygalaceae	(Polygala spp)	Milkwort
		Polygonaceae	(Fallopia convolvulus)	Black Bindweed
		Polygonaceae	(Persicaria hydropiperoides)	Swamp Smartweed
		Polygonaceae	(Persicaria punctata)	Dotted Smartweed
		Polygonaceae	(Persicaria sagittata)	Arrowlead Tearthumb
		Polygonaceae	(Polygonum aviculare)	Prostrate Knotweed
		Polygonaceae	(Rumex britannica)	Great Water Dock
		Polygonaceae	(Rumex obtusifolius)	Bitter Dock
		Polygonaceae	(Rumex verticillatus)	Swamp Dock
		Potamogetonaceae	(Potamogeton pusillus spp. pusillus)	Small Pondweed
		Primulaceae	(Lysimachia thyrsiflora)	Tufted Loosestrife
		Ranunculaceae	(Anemone virginiana var. alba)	Riverbank Thimbleweed
		Rosaceae	(Amelanchier laevis)	Smooth Juneberry
		Rosaceae	(Aruncus dioicus)	Brides' Feather
		Rosaceae	(Dalibarda repens)	Dewdrop
		Rosaceae	(Potentilla argentea)	Silvery Cinquefoil
		Rosaceae	(Rosa cinnamomea)	Cinnamon Rose
		Rosaceae	(Rosa rugosa)	Wrinkled Rose
		Rosaceae	(Rosa virginiana)	Virginia Rose
		Rosaceae	(Rubus canadensis)	Smooth Blackberry
		Rosaceae	(Rubus flagellaris)	Northern Dewberry
		Rosaceae	(Spiraea alba)	Narrow-leaved Meadow-sweet
		Rosaceae	[Crataegus dissona]	Hawthorn
		Rubiaceae	(Galium trifidum spp. trifidum)	Small Bedstraw
		Salicaceae	(Populus alba)	White Poplar
		Salicaceae	(Populus nigra)	Lombardy Poplar
		Salicaceae	(Salix amygdaloides)	Peach-leaved Willow
		Salicaceae	(Salix petiolaris)	Slender Willow
		Salicaceae	(Salix viminalis)	Common Osier
		Saxifragaceae	(Mitella nuda)	Naked Mitrewort
		Scrophulariaceae	(Aureolaria flava)	Smooth Yellow False Foxglove
		Scrophulariaceae	(Pedicularis canadensis)	Canada Wood-betony
		Scrophulariaceae	[Aureolaria virginica]	Downy Yellow False Foxglove
		Selaginellaceae	(Selaginella eclipes)	Meadow Spike Moss
		Solanaceae	(Solanum lycopersicum)	Garden Tomato
		Sparganiaceae	(Sparganium eurycarpum)	Broad-fruited Bur-reed
		Thelypteridaceae	(Thelypteris noveboracensis)	New York Fern
		Tofieldiaceae	(Triantha glutinosa)	Sticky False Asphodel
		Typhaceae	(Typha angustifolia)	Narrow-leaved Cattail
		Urticaceae	(Boehmeria cylindrica)	False Nettle
		Urticaceae	(Urtica dioica spp. gracilis)	American Stinging Nettle
		Valerianaceae	[Valeriana edulis spp. cilata]	Taprooted Valerian
		Verbenaceae	(Verbena simplex)	Narrow-Leaved Vervain
		Violaceae	(Viola labradorica)	American Dog Violet
		Violaceae	(Viola nephrophylla)	Northern Bog Violet
		Violaceae	(Viola renifolia)	Kidney-leaved Violet
		Aceraceae	Acer nigrum	Black Maple
		Aceraceae	Acer platanoides	Norway Maple
		Aceraceae	Acer rubrum	Red Maple
		Aceraceae	Acer saccharinum	Silver Maple
		Aceraceae	Acer saccharum	Sugar Maple
		Aceraceae	Acer spicatum	Mountain Maple
		Adoxaceae	Viburnum acerifolium	Maple-leaved Viburnum
		Adoxaceae	Viburnum lentago	Nannyberry
		Adoxaceae	Viburnum opulus	Guelder Rose
		Adoxaceae	Viburnum opulus spp. trilobum var. americanum	High Bush Cranberry
		Adoxaceae	Viburnum rafinesquianum	Downy Arrow-wood
		Alismataceae	Sagittaria rigida	Sessile-fruited Arrowhead
		Amaranthaceae	Amaranthus tuberculatus	Water-hemp
		Amarylilidaceae	Allium tricoccum	Wild Leek
		Anacardiaceae	Rhus typhina	Staghorn Sumac
		Anacardiaceae	Toxicodendron radicans spp. negundo	Poison-Ivy
		Apiaceae	Aegopodium podagraria	Goutweed
		Apiaceae	Angelica atropurpurea	Dark-purple Alexanders
		Apiaceae	Cicuta bulbifera	Bulb-bearing Water-hemlock
		Apiaceae	Cicuta maculata	Spotted Water-hemlock
		Apiaceae	Conioselinum chinense	Chinese Hemlock Parsley
		Apiaceae	Cryptotaenia canadensis	Honewort
		Apiaceae	Daucus carota	Wild Carrot
		Apiaceae	Erigenia bulbosa	Harbinger-of-Spring
		Apiaceae	Heracleum mantegazzianum	Giant Hogweed
		Apiaceae	Osmorhiza claytonii	Woolly Sweet-cicely
		Apiaceae	Sanicula marilandica	Maryland Black Snakeroot
		Apiaceae	Sium suave	Hemlock Water-parsnip
		Apiaceae	Zizia aurea	Golden Alexanders
		Apocynaceae	Apocynum androsaemifolium	Spreading Dogbane
		Apocynaceae	Apocynum cannabinum	Indian Hemp
		Apocynaceae	Apocynum sp.	Intermediate Hybrid Dogbane
		Apocynaceae	Vinca minor	Periwinkle
		Aquifoliaceae	Ilex verticillata	Winterberry
		Araceae	Arisaema triphyllum	Jack-in-the-pulpit
		Araceae	Calla palustris	Wild Calla
		Araceae	Lemna minor	Lesser Duckweed
		Araceae	Symplocarpus foetidus	Skunk Cabbage
		Araceae	Wolffia borealis	Northern Water-meal
		Araceae	Wolffia columbiana	Columbian Water-meal
		Araliaceae	Aralia nudicaulis	Wild Sarsaparilla
		Araliaceae	Aralia racemosa spp. racemosa	Spikenard
		Araliaceae	Panax quinquefolius	American Ginseng
		Araliaceae	Panax trifolius	Dwarf Ginseng
		Aristolochiaceae	Asarum canadense	Wild Ginger
		Asclepiadaceae	Asclepias exaltata	Poke Milkweed
		Asclepiadaceae	Asclepias syriaca	Common Milkweed
		Asclepiadaceae	Asclepias tuberosa	Butterfly Weed
		Asparagaceae	Asparagus officinalis	Garden Asparagus
		Asparagaceae	Convallaria majalis	Lily-of-the-valley
		Asparagaceae	Maianthemum canadense	Wild Lily-of-the-valley
		Asparagaceae	Maianthemum racemosum spp. racemosum	False Solomon's Seal
		Asparagaceae	Maianthemum stellatum	Star-flowered Solomon's Seal
		Aspleniaceae	Asplenium platyneuron	Ebony Spleenwort
		Aspleniaceae	Asplenium trichomanes spp. trichomanes	Maidenhair Spleenwort
		Asteraceae	Achillea millefolium	Common Yarrow
		Asteraceae	Ageratina altissima	White Snakeroot
		Asteraceae	Ambrosia artemisiifolia	Common Ragweed
		Asteraceae	Ambrosia trifida	Giant Ragweed
		Asteraceae	Antennaria neglecta	Field Pussytoes
		Asteraceae	Arctium lappa	Greant Burdock
		Asteraceae	Arctium minus	Common Burdock
		Asteraceae	Artemisia campestris spp. caudata	Beach Wormwood
		Asteraceae	Aster spp.	Aster
		Asteraceae	Bidens connata	European Beggarticks
		Asteraceae	Bidens frondosa	Devil's Beggarticks
		Asteraceae	Bidens spp.	Beggar-ticks Species
		Asteraceae	Cichorium intybus	Chicory
		Asteraceae	Cirsium arvense	Canada Thistle
		Asteraceae	Cirsium discolor	Field Thistle
		Asteraceae	Cirsium muticum	Swamp Thistle
		Asteraceae	Cirsium vulgare	Bull Thistle
		Asteraceae	Echinacea purpurea	Eastern Purple Coneflower
		Asteraceae	Erechtites hieraciifolius	American Burnweed
		Asteraceae	Erigeron annuus	Annual Fleabane
		Asteraceae	Erigeron canadensis	Horseweed
		Asteraceae	Erigeron philadelphicus var. philadelphicus	Philadelphia Fleabane
		Asteraceae	Erigeron pulchellus	Robin's Plantain
		Asteraceae	Erigeron strigosus	Daisy Fleabane
		Asteraceae	Eupatorium perfoliatum	Perfoliare Thoroughwort
		Asteraceae	Eurybia macrophylla	Large-leaved Aster
		Asteraceae	Euthamia graminifolia	Grass-leaved Goldenrod
		Asteraceae	Eutrochium maculatum var. maculatum	Spotted Joe-Pye-Weed
		Asteraceae	Helianthus decapetalus	Thin-leaved Sunfower
		Asteraceae	Helianthus giganteus	Giant Sunflower
		Asteraceae	Heliopsis helianthoides	Sweet Ox-eye
		Asteraceae	Inula helenium	Elecampane
		Asteraceae	Lactuca canadensis	Tall Lettuce
		Asteraceae	Lactuca serriola	Prickly Lettuce
		Asteraceae	Lapsana communis	Nipplewort
		Asteraceae	Leucanthemum vulgare	Ox-eye Daisy
		Asteraceae	Liatris cylindracea	Cylindric Blazing Star
		Asteraceae	Nabalus albus	White Rattlesnake-root
		Asteraceae	Nabalus altissimus	Tall White Rattlesnake-root
		Asteraceae	Pilosella ×floribunda	Yellow Hybrid Hawkweed
		Asteraceae	Pilosella aurantiaca	Devil's Paintbrush
		Asteraceae	Pilosella caespitosa	Field Hawkweed
		Asteraceae	Pilosella officinarum	Mouse-ear Hawkweed
		Asteraceae	Prenanthes spp.	Composite or Aster Species
		Asteraceae	Ratibida pinnata	Grey-headed coneflower
		Asteraceae	Rudbeckia hirta	Black-eyed Susan
		Asteraceae	Rudbeckia laciniata	Tall Coneflower
		Asteraceae	Solidago altissima var. altissima	Tall Goldenrod
		Asteraceae	Solidago caesia	Blue-stem Goldenrod
		Asteraceae	Solidago canadensis	Canada Goldenrod
		Asteraceae	Solidago flexicaulis	Zig-zag Goldenrod
		Asteraceae	Solidago gigantea	Giant Goldenrod
		Asteraceae	Solidago hispida	Hairy Goldenrod
		Asteraceae	Solidago juncea	Early Goldenrod
		Asteraceae	Solidago nemoralis spp. nemoralis	Gray Goldenrod
		Asteraceae	Solidago patula	Rough-leaved Goldenrod
		Asteraceae	Solidago ptarmicoides	Upland White Aster
		Asteraceae	Solidago rigida	Stiff Goldenrod
		Asteraceae	Solidago rugosa spp. rugosa	Rough-stemmed Goldenrod
		Asteraceae	Solidago spp.	Goldenrod
		Asteraceae	Sonchus arvensis spp. arvensis	Field Sow-thistle
		Asteraceae	Sonchus oleraceus	Common Sow-thistle
		Asteraceae	Symphyotrichum cordifolium	Heart-leaved Aster
		Asteraceae	Symphyotrichum ericoides var. ericoides	White Heath Aster
		Asteraceae	Symphyotrichum laeve	Smooth Aster
		Asteraceae	Symphyotrichum lanceolatum	Panicled Aster
		Asteraceae	Symphyotrichum lateriflorum var. hirsuticaule	Calico Aster
		Asteraceae	Symphyotrichum lateriflorum var. lateriflorum	Calico Aster
		Asteraceae	Symphyotrichum novae-angliae	New England Aster
		Asteraceae	Symphyotrichum oolentangiense	Azure Aster
		Asteraceae	Symphyotrichum oolentangiense var. oolentangiense	Sky Blue Aster
		Asteraceae	Symphyotrichum pilosum var. pilosum	Hairy Aster
		Asteraceae	Symphyotrichum puniceum	Purple stemmed Aster
		Asteraceae	Symphyotrichum racemosum	Smooth White Oldfield Aster
		Asteraceae	Symphyotrichum spp.	Aster species
		Asteraceae	Symphyotrichum urophyllum	Arrow-leaved Aster
		Asteraceae	Tanacetum vulgare	Common Tansy
		Asteraceae	Taraxacum officinale	Dandelion
		Asteraceae	Tragopogon dubius	Doubtful Goat's beard
		Asteraceae	Tragopogon pratensis	Meadow Goat's-beard
		Asteraceae	Tussilago farfara	Coltsfoot
		Asteraceae	Xanthium strumarium	Tumor-curing Cocklebur
		Balsaminaceae	Impatiens capensis	Spotted Jewelweed
		Balsaminaceae	Impatiens glandulifera	Glandular Jewelweed
		Balsaminaceae	Impatiens pallida	Pale Jewelweed
		Berberidaceae	Berberis thunbergii	Japanese Barberry
		Berberidaceae	Berberis vulgaris	Common Barberry
		Berberidaceae	Caulophyllum thalictroides	Blue Cohosh
		Berberidaceae	Podophyllum peltatum	May-apple
		Betulaceae	Alnus glutinosa	European Black Alder
		Betulaceae	Alnus incana spp. rugosa	Speckled Alder
		Betulaceae	Betula alleghaniensis	Yellow Birch
		Betulaceae	Betula papyrifera	White Birch
		Betulaceae	Betula pumila	Swamp Birch
		Betulaceae	Carpinus caroliniana spp. virginiana	Blue Beech
		Betulaceae	Corylus americana	American Hazel
		Betulaceae	Corylus cornuta spp. cornuta	Beaked Hazel
		Betulaceae	Ostrya virginiana	Ironwood
		Boraginaceae	Echium vulgare	Blueweed
		Boraginaceae	Hackelia virginiana	Virginia Stickweed
		Boraginaceae	Myosotis laxa	Small Forget-me-not
		Boraginaceae	Myosotis scorpioides	Mouse-ear Scorpion-grass
		Boraginaceae	Myosotis verna	Spring Forget-me-not
		Boraginaceae	Symphytum officinale	Common Comfrey
		Brassicaceae	Alliaria petiolata	Garlic Mustard
		Brassicaceae	Barbarea vulgaris	Yellow Rocket
		Brassicaceae	Brassica rapa	Wild Turnip
		Brassicaceae	Capsella bursa-pastoris	Shepherd's Pie
		Brassicaceae	Cardamine bulbosa	Bulbous cress
		Brassicaceae	Cardamine concatenata	Cut-leaved toothwort
		Brassicaceae	Cardamine diphylla	Two-leaved toothwort
		Brassicaceae	Cardamine maxima	Great toothwort
		Brassicaceae	Cardamine pensylvanica	Pennsylvania Bittercress
		Brassicaceae	Hesperis matronalis	Dame's Rocket
		Brassicaceae	Nasturtium officinale	Water-cress
		Brassicaceae	Sinapis arvensis	Charlock
		Brassicaceae	Thlaspi arvense	Field Penny-cress
		Brassicaceae	Turritis glabra	Tower Mustard
		Butomaceae	Butomus umbellatus	Flowering-rush
		Cabombaceae	Brasenia schreberi	Water-shield
		Campanulaceae	Lobelia cardinalis	Cardinal-flower
		Campanulaceae	Lobelia inflata	Indian Tobacco
		Campanulaceae	Lobelia siphilitica	Great Lobelia
		Caprifoliaceae	Caprifoliaceae spp.	Honeysuckle species
		Caprifoliaceae	Diervilla lonicera	Bush Honeysuckle
		Caprifoliaceae	Lonicera canadensis	American Fly Honeysuckle
		Caprifoliaceae	Lonicera dioica	Glaucous Honeysuckle
		Caprifoliaceae	Lonicera morrowii	Morrow's Honeysuckle
		Caprifoliaceae	Lonicera tatarica	Tartarian Honeysuckle
		Caprifoliaceae	Sambucus canadensis	Common Elderberry
		Caprifoliaceae	Sambucus racemosa spp. pubens	Red-berried Elderberry
		Caryophyllaceae	Cerastium arvense spp. arvense	Field Chickweed
		Caryophyllaceae	Cerastium fontanum spp. vulgare	Larger Mouse-ear Chickweed
		Caryophyllaceae	Dianthus armeria	Deptford Pink
		Caryophyllaceae	Saponaria officinalis	Bouncing-bet
		Caryophyllaceae	Silene latifolia	White Campion
		Caryophyllaceae	Silene vulgaris	Catchfly
		Celastraceae	Euonymus alatus	Winged Spindle Tree
		Celastraceae	Euonymus atropurpureus	Burning Bush
		Celastraceae	Euonymus obovatus	Running Strawberry-bush
		Chenopodiaceae	Chenopodium album	Lamb's Quarters
		Convolvulaceae	Calystegia spithamaea	Low bindweed
		Convolvulaceae	Convolvulus arvensis	Field Bindweed
		Convolvulaceae	Cuscuta gronovii	Gronovius' Dodder
		Cornaceae	Cornus alternifolia	Alternate-leaved Dogwood
		Cornaceae	Cornus canadensis	Bunchberry
		Cornaceae	Cornus obliqua	Silky Dogwood
		Cornaceae	Cornus racemosa	Red Panicled Dogwood
		Cornaceae	Cornus rugosa	Round-leaved Dogwood
		Cornaceae	Cornus stolonifera	Red-osier Dogwood
		Crassulaceae	Sedum acre	Stonecrop
		Cucurbitaceae	Echinocystis lobata	Prickly Cucumber
		Cupressaceae	Juniperus communis var. depressa	Common Juniper
		Cupressaceae	Thuja occidentalis	Eastern White Cedar
		Cyperaceae	Carex albursina	White Bear Sedge
		Cyperaceae	Carex atherodes	Awned Sedge
		Cyperaceae	Carex backii	Back's Sedge
		Cyperaceae	Carex bebbii	Bebb's Sedge
		Cyperaceae	Carex chordorrhiza	Creeping Sedge
		Cyperaceae	Carex crinita	Fringed Sedge
		Cyperaceae	Carex deweyana	Short-scale Sedge
		Cyperaceae	Carex diandra	Lesser Panicled Sedge
		Cyperaceae	Carex disperma	Soft-leaved Sedge
		Cyperaceae	Carex foenea	Fernald's Hay Sedge
		Cyperaceae	Carex gracillima	Graceful Sedge
		Cyperaceae	Carex granularis	Meadow Sedge
		Cyperaceae	Carex grisea	Inflated Narrow-Leaf Sedge
		Cyperaceae	Carex hirtifolia	Pubescent Sedge
		Cyperaceae	Carex hitchcockiana	Hitchcock's Sedge
		Cyperaceae	Carex hystericina	Porcupine Sedge
		Cyperaceae	Carex intumescens	Bladder Sedge
		Cyperaceae	Carex jamesii	James' Sedge
		Cyperaceae	Carex lacustris	Lake-bank Sedge
		Cyperaceae	Carex laevivaginata	Smooth-sheath Sedge
		Cyperaceae	Carex lasiocarpa	Slender Sedge
		Cyperaceae	Carex laxiculmis	Spreading Sedge
		Cyperaceae	Carex laxiflora	Broad Looseflower Sedge
		Cyperaceae	Carex leptalea	Bristle-stalked Sedge
		Cyperaceae	Carex livida	Livid Sedge
		Cyperaceae	Carex normalis	Larger Straw Sedge
		Cyperaceae	Carex peckii	Peck's Sedge
		Cyperaceae	Carex pedunculata	Long Stalk Sedge
		Cyperaceae	Carex pensylvanica	Pennsylvania Sedge
		Cyperaceae	Carex plantaginea	Plantain-leaved Sedge
		Cyperaceae	Carex platyphylla	Broad-leaved Sedge
		Cyperaceae	Carex projecta	Necklace Sedge
		Cyperaceae	Carex pseudocyperus	Cypress-like Sedge
		Cyperaceae	Carex rosea	Stellate Sedge
		Cyperaceae	Carex scabrata	Rough Sedge
		Cyperaceae	Carex schweinitzii	Schweinitz's sedge
		Cyperaceae	Carex scoparia	Pointed Broom Sedge
		Cyperaceae	Carex sparganioides	Burreed Sedge
		Cyperaceae	Carex spp.	Sedge
		Cyperaceae	Carex stipata	Awl-fruited Sedge
		Cyperaceae	Carex stricta	Stiff Sedge
		Cyperaceae	Carex tetanica	Common Stiff Sedge
		Cyperaceae	Carex trichocarpa	Hairy-fruited Sedge
		Cyperaceae	Carex trisperma	Three-seeded Sedge
		Cyperaceae	Carex utriculata	Beaked Sedge
		Cyperaceae	Carex vulpinoidea	Fox Sedge
		Cyperaceae	Carex woodii	Purple-tinged Sedge
		Cyperaceae	Cyperus bipartitus	Shining Nut Grass
		Cyperaceae	Cyperus esculentus	Yellow Nut-grass
		Cyperaceae	Eleocharis acicularis	Least Spike-rush
		Cyperaceae	Eleocharis intermedia	Matted Spikerush
		Cyperaceae	Eriophorum virginicum	Tawny Cotton-grass
		Cyperaceae	Eriophorum viridicarinatum	Green-keeled Cotton-grass
		Cyperaceae	Scirpus atrovirens	Dark Green Bulrush
		Cyperaceae	Scirpus cyperinus	Wool-grass
		Dennstaedtiaceae	Pteridium aquilinum var. latiusculum	Eastern Bracken Fern
		Dipsacaceae	Dipsacus fullonum	Teasel
		Dryopteridaceae	Athyrium filix-femina var. angustum	Northern Lady Fern
		Dryopteridaceae	Cystopteris bulbifera	Bulbet Bladder Fern
		Dryopteridaceae	Cystopteris fragilis	Fragile Fern
		Dryopteridaceae	Deparia acrostichoides	Silvery Glade Fern
		Dryopteridaceae	Dryopteris ×triploidea	Triploid Hybrid Wood Fern
		Dryopteridaceae	Dryopteris carthusiana	Spinulose Wood Fern
		Dryopteridaceae	Dryopteris clintoniana	Clinton's Wood Fern
		Dryopteridaceae	Dryopteris cristata	Crested Wood Fern
		Dryopteridaceae	Dryopteris goldiana	Giant Wood Fern
		Dryopteridaceae	Dryopteris intermedia	Evergreen Wood Fern
		Dryopteridaceae	Dryopteris marginalis	Marginal Wood Fern
		Dryopteridaceae	Gymnocarpium dryopteris	Oak Fern
		Dryopteridaceae	Matteuccia struthiopteris var. pensylvanica	Ostrich Fern
		Dryopteridaceae	Onoclea sensibilis	Sensitive Fern
		Dryopteridaceae	Polystichum acrostichoides	Christmas Fern
		Elaeagnaceae	Elaeagnus angustifolia	Russian Olive
		Elaeagnaceae	Elaeagnus umbellata	Autumn Olive
		Equisetaceae	Equisetum arvense	Field Horsetail
		Equisetaceae	Equisetum hyemale spp. affine	Scouring-rush
		Equisetaceae	Equisetum palustre	Marsh Hosetail
		Equisetaceae	Equisetum pratense	Meadow Horsetail
		Equisetaceae	Equisetum scirpoides	Dwarf Scouring-rush
		Equisetaceae	Equisetum variegatum spp. variegatum	Variegated Horsetail
		Ericaceae	Epigaea repens	Trailing arbutus
		Ericaceae	Gaultheria hispidula	Creeping Snowberry
		Ericaceae	Gaultheria procumbens	Wintergreen
		Ericaceae	Vaccinium angustifolium	Low Sweet Blueberry
		Ericaceae	Vaccinium myrtilloides	Velvet-leaf Blueberry
		Euphorbiaceae	Euphorbia cyparissias	Cypress Spurge
		Euphorbiaceae	Euphorbia esula	Leafy Spurge
		Fabaceae	Amphicarpaea bracteata	Hog Peanut
		Fabaceae	Apios americana	Groundnut
		Fabaceae	Desmodium canadense	Candian Tick-trefoil
		Fabaceae	Lespedeza capitata	Roundhead Bushclover
		Fabaceae	Lotus corniculatus	Bird-foot Trefoil
		Fabaceae	Medicago lupulina	Black Medic
		Fabaceae	Robinia pseudoacacia	Black Locust
		Fabaceae	Trifolium aureum	Hop Clover
		Fabaceae	Trifolium hybridum	Alsike Clover
		Fabaceae	Trifolium pratense	Red Clover
		Fabaceae	Vicia americana	American Vetch
		Fabaceae	Vicia cracca	Tufted Vetch
		Fagaceae	Fagus grandifolia	American Beech
		Fagaceae	Quercus alba	White Oak
		Fagaceae	Quercus ellipsoidalis	Hill's Oak
		Fagaceae	Quercus macrocarpa	Bur Oak
		Fagaceae	Quercus palustris	Pin Oak
		Fagaceae	Quercus rubra	Red Oak
		Fagaceae	Quercus velutina	Black Oak
		Gentianaceae	Gentiana andrewsii	Closed Gentian
		Gentianaceae	Gentianopsis virgata spp. virgata	Smaller Fringed Gentian
		Geraniaceae	Geranium maculatum	Spotted Crane's-bill
		Geraniaceae	Geranium robertianum	Herb Robert
		Grossulariaceae	Ribes americanum	Wild Black Currant
		Grossulariaceae	Ribes cynosbati	Prickly Gooseberry
		Grossulariaceae	Ribes hirtellum	Hairy-stem Gooseberry
		Grossulariaceae	Ribes lacustre	Swamp Black Currant
		Grossulariaceae	Ribes rubrum	Red Currant (European)
		Grossulariaceae	Ribes spp.	Currant Species
		Grossulariaceae	Ribes triste	Wild Red Currant
		Haloragaceae	Myriophyllum heterophyllum	Two-leaf Water Milfoil
		Haloragaceae	Myriophyllum verticillatum	Green Water Milfoil
		Hamamelidaceae	Hamamelis virginiana	Witch-hazel
		Huperziaceae	Huperzia lucidula	Shining Clubmoss
		Hydrophyllaceae	Hydrophyllum canadense	Broad-leaved Water-leaf
		Hydrophyllaceae	Hydrophyllum virginianum	Virginia Water-leaf
		Hypericaceae	Hypericum ascyron	Great St. John's-wort
		Hypericaceae	Hypericum mutilum spp. mutilum	Dwarf St. John's-wort
		Hypericaceae	Hypericum perforatum	Common St. John's-wort
		Hypericaceae	Hypericum punctatum	Corymbed St. John's-wort
		Iridaceae	Iris pseudacorus	Yellow Iris
		Iridaceae	Iris spp.	Iris Species
		Iridaceae	Iris versicolor	Multi-coloured Blue-flag
		Iridaceae	Sisyrinchium angustifolium	Pointed Blue-eyed-grass
		Iridaceae	Sisyrinchium mucronatum	Narrow-leaved Blue-eyed-grass
		Juglandaceae	Carya cordiformis	Bitternut Hickory
		Juglandaceae	Carya glabra	Pignut Hickory
		Juglandaceae	Carya ovata var. ovata	Shagbark Hickory
		Juglandaceae	Juglans cinerea	Butternut
		Juglandaceae	Juglans nigra	Black Walnut
		Juncaceae	Juncus tenuis	Path Rush
		Juncaceae	Juniperus virginiana	Eastern Red Cedar
		Juncaceae	Luzula acuminata	Hairy Woodrush
		Lamiaceae	Blephilia hirsuta	Hairy Wood Mint
		Lamiaceae	Clinopodium vulgare	Wild Basil
		Lamiaceae	Collinsonia canadensis	Stoneroot
		Lamiaceae	Galeopsis tetrahit	Common Hemp-nettle
		Lamiaceae	Glechoma hederacea	Creeping Charlie
		Lamiaceae	Leonurus cardiaca	Motherwort
		Lamiaceae	Lycopus americanus	Cut-leaved Water-horehound
		Lamiaceae	Lycopus uniflorus	Northern Water-horehound
		Lamiaceae	Melissa officinalis	Common Balm
		Lamiaceae	Mentha arvensis	Field Mint
		Lamiaceae	Mentha sp.	Pepper Mint
		Lamiaceae	Monarda fistulosa	Wild Bergamot
		Lamiaceae	Nepeta cataria	Catnip
		Lamiaceae	Physostegia virginiana spp. Virginiana	Virginia False Dragonhead
		Lamiaceae	Prunella vulgaris spp. lanceolata	Heal-all
		Lamiaceae	Prunella vulgaris spp. vulgaris	Common Heal-all
		Lamiaceae	Pycnanthemum virginianum	Virginia Mountain Mint
		Lamiaceae	Scutellaria galericulata	Hooded Skullcap
		Lamiaceae	Scutellaria lateriflora	Mad-dog Skullcap
		Lamiaceae	Stachys hispida	Rough Hedge Nettle
		Lamiaceae	Teucrium canadense spp. canadense	Wood Germander
		Lauraceae	Lindera benzoin	Spicebush
		Liliaceae	Clintonia borealis	Bluebead-lily
		Liliaceae	Erythronium albidum	White Trout Lily
		Liliaceae	Erythronium americanum spp. americanum	Yellow Dog's-tooth Violet
		Liliaceae	Lilium canadense	Canada Lily
		Liliaceae	Lilium philadelphicum	Wood Lily
		Liliaceae	Medeola virginiana	Indian Cucumber-root
		Liliaceae	Polygonatum pubescens	Hairy Solomon's Seal
		Liliaceae	Streptopus lanceolatus var. lanceolatus	Rose Twisted-stalk
		Liliaceae	Trillium erectum	Purple Trillium
		Liliaceae	Trillium grandiflorum	White Trillium
		Liliaceae	Uvularia grandiflora	Large-flowered Bellwort
		Lycopodiaceae	Lycopodiella inundata	Northern Bog Clubmoss
		Lycopodiaceae	Lycopodium annotinum	Bristly clubmoss
		Lycopodiaceae	Lycopodium obscurum	Ground Pine
		Lycopodiaceae	Lycopodium spp.	Clubmoss Species
		Lythraceae	Lythrum salicaria	Purple Loosestrife
		Melanthiaceae	Anticlea elegans var. glaucus	White Camass
		Menispermaceae	Menispermum canadense	Moonseed
[truncated: 257 more rows]

## Sheet: Sheet3
Kingdom	Phylum	Class	Order	Family	Genus	Species	Subspecies	Variety	Pre-2015 Inventory
Fungi	Zygomycota	Zygomycetes	Mortierellales	Mortierellaceae	Mortierella	hyalina			Y
