# Supplementary material for: Biodiversity inventories in high gear: DNA barcoding facilitates a rapid biotic survey of a temperate nature reserve
Source: Biodivers Data J. 2015 Aug 30;(3):e6313. doi: 10.3897/BDJ.3.e6313 (PMC4568406; doi:10.3897/BDJ.3.e6313)
Supplement: Supplementary material 3 — Lysis, primer and marker details [file biodiversity_data_journal-3-e6313-s003.xlsx]

## Sheet: Sheet1
Major group(s)	Barcode marker(s)	Primer combination(s)	Lysis buffer
Annelida, Arthropoda, Myriapoda	COI	C_LepFolF + C_LepFolR	invertebrate
Zooplankton	COI	ZplankF1_t1 + ZplankR1_t1	invertebrate
Fungi (including Lichens)	ITS	ITS1-F + ITS4	CTAB/invert
Mollusca	COI	C_GasF1_t1 + GasR1_t1	CTAB
Nematoda	COI	C_NemF1_t1 + C_NemR1_t1	invertebrate
Plants	rbcL & ITS	26 rbcLa-F + rbcLa-R & ITS_S2F+ITS4	CTAB
