# Supplementary material for: Biodiversity inventories in high gear: DNA barcoding facilitates a rapid biotic survey of a temperate nature reserve
Source: Biodivers Data J. 2015 Aug 30;(3):e6313. doi: 10.3897/BDJ.3.e6313 (PMC4568406; doi:10.3897/BDJ.3.e6313)
Supplement: Supplementary material 4 — Summary data for 2015 inventory [file biodiversity_data_journal-3-e6313-s004.xlsx]

## Sheet: Sheet1
Phylum	Class	Order	Family	Subfamily	Genus	Species	Identifier	Process ID	BIN	GenBank Accession	Collection Date	Exact Site	Latitude	Longitude	Elev
Arthropoda	Insecta	Hymenoptera	Formicidae	Formicinae	Formica		Angela Telfer	RRMFD459-15	BOLD:AAA1467	pending	21-May-2015	Site 3 - South Field, forest edge	43.37	-80.364	312
Arthropoda	Insecta	Lepidoptera	Plutellidae	Plutellinae	Plutella	Plutella xylostella	Angela Telfer	RRMPE365-15	BOLD:AAA1513	pending	27-May-2015	Site 4 - Blair Flats, unburned prairie	43.385	-80.369	264
Arthropoda	Insecta	Lepidoptera	Plutellidae	Plutellinae	Plutella	Plutella xylostella	Angela Telfer	RRSSA325-15	BOLD:AAA1513	pending	29-May-2015	Site 1 - Field Edge Forest	43.374	-80.354	332
Arthropoda	Insecta	Lepidoptera	Tortricidae	Tortricinae	Choristoneura	Choristoneura rosaceana	Angela Telfer	RRSSA3874-15	BOLD:AAA1517	pending	27-May-2015	Site 1 - Field Edge Forest	43.374	-80.354	332
Arthropoda	Insecta	Lepidoptera	Tortricidae	Tortricinae	Choristoneura	Choristoneura rosaceana	Angela Telfer	RRMFE2440-15	BOLD:AAA1517	pending	27-May-2015	Site 3 - South Field, forest edge	43.3705	-80.3641	312
Arthropoda	Insecta	Trichoptera	Leptoceridae	Leptocerinae	Oecetis	Oecetis inconspicua	Angela Telfer	RRMFG2497-15	BOLD:AAA1532	pending	11-Jun-2015	Site 3 - South Field, forest edge	43.37	-80.364	312
Arthropoda	Insecta	Diptera	Sarcophagidae		Helicobia		Angela Telfer	RRMPE353-15	BOLD:AAA1962	pending	27-May-2015	Site 4 - Blair Flats, unburned prairie	43.385	-80.369	264
Arthropoda	Insecta	Diptera	Sarcophagidae		Helicobia		Angela Telfer	RRMFD508-15	BOLD:AAA1962	pending	21-May-2015	Site 3 - South Field, forest edge	43.37	-80.364	312
Arthropoda	Insecta	Lepidoptera	Erebidae	Lymantriinae	Lymantria	Lymantria dispar dispar	Angela Telfer	RRMFE944-15	BOLD:AAA2052	pending	27-May-2015	Site 3 - South Field, forest edge	43.37	-80.364	312
Arthropoda	Insecta	Lepidoptera	Erebidae	Lymantriinae	Lymantria	Lymantria dispar dispar	Angela Telfer	RRMFC670-15	BOLD:AAA2052	pending	14-May-2015	Site 3 - South Field, forest edge	43.37	-80.364	312
Arthropoda	Insecta	Lepidoptera	Erebidae	Lymantriinae	Lymantria	Lymantria dispar dispar	Angela Telfer	RRMPC1031-15	BOLD:AAA2052	pending	14-May-2015	Site 4 - Blair Flats, unburned prairie	43.385	-80.369	264
Arthropoda	Insecta	Lepidoptera	Erebidae	Lymantriinae	Lymantria	Lymantria dispar dispar	Angela Telfer	RRMFC2228-15	BOLD:AAA2052	pending	14-May-2015	Site 3 - South Field, forest edge	43.37	-80.364	312
Arthropoda	Insecta	Lepidoptera	Erebidae	Lymantriinae	Lymantria	Lymantria dispar dispar	Angela Telfer	RRMFD1630-15	BOLD:AAA2052	pending	21-May-2015	Site 3 - South Field, forest edge	43.37	-80.364	312
Arthropoda	Insecta	Lepidoptera	Erebidae	Lymantriinae	Lymantria	Lymantria dispar dispar	Angela Telfer	RRMFC2230-15	BOLD:AAA2052	pending	14-May-2015	Site 3 - South Field, forest edge	43.37	-80.364	312
Arthropoda	Insecta	Lepidoptera	Erebidae	Lymantriinae	Lymantria	Lymantria dispar dispar	Angela Telfer	RRMFC2231-15	BOLD:AAA2052	pending	14-May-2015	Site 3 - South Field, forest edge	43.37	-80.364	312
Arthropoda	Insecta	Lepidoptera	Erebidae	Lymantriinae	Lymantria	Lymantria dispar dispar	Angela Telfer	RRMFD1643-15	BOLD:AAA2052	pending	21-May-2015	Site 3 - South Field, forest edge	43.37	-80.364	312
Arthropoda	Insecta	Lepidoptera	Erebidae	Lymantriinae	Lymantria	Lymantria dispar dispar	Angela Telfer	RRMFC669-15	BOLD:AAA2052	pending	14-May-2015	Site 3 - South Field, forest edge	43.37	-80.364	312
Arthropoda	Insecta	Lepidoptera	Erebidae	Lymantriinae	Lymantria	Lymantria dispar dispar	Angela Telfer	RRMFD1621-15	BOLD:AAA2052	pending	21-May-2015	Site 3 - South Field, forest edge	43.37	-80.364	312
Arthropoda	Insecta	Lepidoptera	Erebidae	Lymantriinae	Lymantria	Lymantria dispar dispar	Angela Telfer	RRMFD1632-15	BOLD:AAA2052	pending	21-May-2015	Site 3 - South Field, forest edge	43.37	-80.364	312
Arthropoda	Insecta	Lepidoptera	Erebidae	Lymantriinae	Lymantria	Lymantria dispar dispar	Angela Telfer	RRMFC668-15	BOLD:AAA2052	pending	14-May-2015	Site 3 - South Field, forest edge	43.37	-80.364	312
Arthropoda	Insecta	Lepidoptera	Erebidae	Lymantriinae	Lymantria	Lymantria dispar dispar	Angela Telfer	RRMFC667-15	BOLD:AAA2052	pending	14-May-2015	Site 3 - South Field, forest edge	43.37	-80.364	312
Arthropoda	Insecta	Lepidoptera	Erebidae	Lymantriinae	Lymantria	Lymantria dispar dispar	Angela Telfer	RRMFE942-15	BOLD:AAA2052	pending	27-May-2015	Site 3 - South Field, forest edge	43.37	-80.364	312
Arthropoda	Insecta	Lepidoptera	Erebidae	Lymantriinae	Lymantria	Lymantria dispar dispar	Angela Telfer	RRMFC2227-15	BOLD:AAA2052	pending	14-May-2015	Site 3 - South Field, forest edge	43.37	-80.364	312
Arthropoda	Insecta	Lepidoptera	Erebidae	Lymantriinae	Lymantria	Lymantria dispar dispar	Angela Telfer	RRMFD1642-15	BOLD:AAA2052	pending	21-May-2015	Site 3 - South Field, forest edge	43.37	-80.364	312
Arthropoda	Insecta	Lepidoptera	Erebidae	Lymantriinae	Lymantria	Lymantria dispar dispar	Angela Telfer	RRMPD512-15	BOLD:AAA2052	pending	21-May-2015	Site 4 - Blair Flats, unburned prairie	43.385	-80.369	264
Arthropoda	Insecta	Lepidoptera	Erebidae	Lymantriinae	Lymantria	Lymantria dispar dispar	Angela Telfer	RRMFC2229-15	BOLD:AAA2052	pending	14-May-2015	Site 3 - South Field, forest edge	43.37	-80.364	312
Arthropoda	Insecta	Lepidoptera	Erebidae	Lymantriinae	Lymantria	Lymantria dispar dispar	Angela Telfer	RRMFD1623-15	BOLD:AAA2052	pending	21-May-2015	Site 3 - South Field, forest edge	43.37	-80.364	312
Arthropoda	Insecta	Lepidoptera	Erebidae	Lymantriinae	Lymantria	Lymantria dispar dispar	Angela Telfer	RRMPD513-15	BOLD:AAA2052	pending	21-May-2015	Site 4 - Blair Flats, unburned prairie	43.385	-80.369	264
Arthropoda	Insecta	Hemiptera	Aphididae	Eriosomatinae	Melaphis	Melaphis rhois	Angela Telfer	RRMFD174-15	BOLD:AAA2079	pending	21-May-2015	Site 3 - South Field, forest edge	43.37	-80.364	312
Arthropoda	Insecta	Hemiptera	Aphididae	Eriosomatinae	Melaphis	Melaphis rhois	Angela Telfer	RRBAA608-15	BOLD:AAA2079	pending	01-May-2015	Site 1 - Woodland Trail, alvar	43.379	-80.346	288
Arthropoda	Insecta	Hemiptera	Aphididae	Eriosomatinae	Melaphis	Melaphis rhois	Angela Telfer	RRBAA605-15	BOLD:AAA2079	pending	01-May-2015	Site 1 - Woodland Trail, alvar	43.379	-80.346	288
Arthropoda	Insecta	Hemiptera	Aphididae	Eriosomatinae	Melaphis	Melaphis rhois	Angela Telfer	RRBAA606-15	BOLD:AAA2079	pending	01-May-2015	Site 1 - Woodland Trail, alvar	43.379	-80.346	288
Arthropoda	Insecta	Hemiptera	Aphididae	Eriosomatinae	Melaphis	Melaphis rhois	Angela Telfer	RRMFD257-15	BOLD:AAA2079	pending	21-May-2015	Site 3 - South Field, forest edge	43.37	-80.364	312
Arthropoda	Insecta	Hemiptera	Aphididae	Eriosomatinae	Melaphis	Melaphis rhois	Angela Telfer	RRBAA604-15	BOLD:AAA2079	pending	01-May-2015	Site 1 - Woodland Trail, alvar	43.379	-80.346	288
Arthropoda	Insecta	Hemiptera	Aphididae	Eriosomatinae	Melaphis	Melaphis rhois	Angela Telfer	RRBAA601-15	BOLD:AAA2079	pending	01-May-2015	Site 1 - Woodland Trail, alvar	43.379	-80.346	288
Arthropoda	Insecta	Hemiptera	Aphididae	Eriosomatinae	Melaphis	Melaphis rhois	Angela Telfer	RRBAA595-15	BOLD:AAA2079	pending	01-May-2015	Site 1 - Woodland Trail, alvar	43.379	-80.346	288
Arthropoda	Insecta	Diptera	Cecidomyiidae	Cecidomyiinae	Asteromyia	Asteromyia carbonifera	Angela Telfer	RRMFE754-15	BOLD:AAA2254	pending	27-May-2015	Site 3 - South Field, forest edge	43.37	-80.364	312
Arthropoda	Insecta	Diptera	Cecidomyiidae	Cecidomyiinae	Asteromyia	Asteromyia carbonifera	Angela Telfer	RRMFG1831-15	BOLD:AAA2254	pending	11-Jun-2015	Site 3 - South Field, forest edge	43.3705	-80.3641	312
Arthropoda	Insecta	Diptera	Cecidomyiidae	Cecidomyiinae	Asteromyia	Asteromyia carbonifera	Angela Telfer	RRMFI1069-15	BOLD:AAA2254	pending	24-Jun-2015	Site 3 - South Field, forest edge	43.37	-80.364	312
Arthropoda	Insecta	Diptera	Cecidomyiidae	Cecidomyiinae	Asteromyia	Asteromyia carbonifera	Angela Telfer	RRMFI1632-15	BOLD:AAA2254	pending	24-Jun-2015	Site 3 - South Field, forest edge	43.37	-80.364	312
Arthropoda	Insecta	Diptera	Cecidomyiidae	Cecidomyiinae	Asteromyia	Asteromyia carbonifera	Angela Telfer	RRMFI706-15	BOLD:AAA2254	pending	24-Jun-2015	Site 3 - South Field, forest edge	43.37	-80.364	312
Arthropoda	Insecta	Hymenoptera	Apidae	Xylocopinae	Ceratina	Ceratina mikmaqi	Thanushi I. Eagalle	RRMPD027-15	BOLD:AAA2368	pending	21-May-2015	Site 4 - Blair Flats, unburned prairie	43.385	-80.369	264
Arthropoda	Insecta	Hymenoptera	Apidae	Xylocopinae	Ceratina	Ceratina mikmaqi	Thanushi I. Eagalle	RRMFE2976-15	BOLD:AAA2368	pending	27-May-2015	Site 3 - South Field, forest edge	43.3705	-80.3641	312
Arthropoda	Insecta	Hymenoptera	Apidae	Xylocopinae	Ceratina	Ceratina mikmaqi	Thanushi I. Eagalle	RRMFE2974-15	BOLD:AAA2368	pending	27-May-2015	Site 3 - South Field, forest edge	43.3705	-80.3641	312
Arthropoda	Insecta	Hymenoptera	Apidae	Xylocopinae	Ceratina	Ceratina mikmaqi	Thanushi I. Eagalle	RRMPC905-15	BOLD:AAA2368	pending	14-May-2015	Site 4 - Blair Flats, unburned prairie	43.385	-80.369	264
Arthropoda	Insecta	Hymenoptera	Apidae	Xylocopinae	Ceratina	Ceratina mikmaqi	Thanushi I. Eagalle	RRMPC904-15	BOLD:AAA2368	pending	14-May-2015	Site 4 - Blair Flats, unburned prairie	43.385	-80.369	264
Arthropoda	Insecta	Hymenoptera	Apidae	Xylocopinae	Ceratina	Ceratina mikmaqi	Thanushi I. Eagalle	RRMPC907-15	BOLD:AAA2368	pending	14-May-2015	Site 4 - Blair Flats, unburned prairie	43.385	-80.369	264
Arthropoda	Insecta	Hymenoptera	Apidae	Xylocopinae	Ceratina	Ceratina mikmaqi	Thanushi I. Eagalle	RRMFE2656-15	BOLD:AAA2368	pending	27-May-2015	Site 3 - South Field, forest edge	43.3705	-80.3641	312
Arthropoda	Insecta	Hymenoptera	Apidae	Xylocopinae	Ceratina	Ceratina mikmaqi	Thanushi I. Eagalle	RRMFG2792-15	BOLD:AAA2368	pending	11-Jun-2015	Site 3 - South Field, forest edge	43.37	-80.364	312
Arthropoda	Insecta	Hymenoptera	Apidae	Xylocopinae	Ceratina	Ceratina mikmaqi	Thanushi I. Eagalle	RRMFC1776-15	BOLD:AAA2368	pending	14-May-2015	Site 3 - South Field, forest edge	43.37	-80.364	312
Arthropoda	Insecta	Hymenoptera	Apidae	Xylocopinae	Ceratina	Ceratina mikmaqi	Thanushi I. Eagalle	RRMFD475-15	BOLD:AAA2368	pending	21-May-2015	Site 3 - South Field, forest edge	43.37	-80.364	312
Arthropoda	Insecta	Hymenoptera	Apidae	Xylocopinae	Ceratina	Ceratina mikmaqi	Thanushi I. Eagalle	RRMFD466-15	BOLD:AAA2368	pending	21-May-2015	Site 3 - South Field, forest edge	43.37	-80.364	312
Arthropoda	Insecta	Hymenoptera	Apidae	Xylocopinae	Ceratina	Ceratina mikmaqi	Thanushi I. Eagalle	RRMPC901-15	BOLD:AAA2368	pending	14-May-2015	Site 4 - Blair Flats, unburned prairie	43.385	-80.369	264
Arthropoda	Insecta	Hymenoptera	Apidae	Xylocopinae	Ceratina	Ceratina mikmaqi	Thanushi I. Eagalle	RRMPE374-15	BOLD:AAA2368	pending	27-May-2015	Site 4 - Blair Flats, unburned prairie	43.385	-80.369	264
Arthropoda	Insecta	Hymenoptera	Formicidae	Formicinae	Camponotus	Camponotus herculeanus	Connor P. K. Warne	RRMFB944-15	BOLD:AAA2372	pending	07-May-2015	Site 3 - South Field, forest edge	43.3705	-80.3641	312
Arthropoda	Insecta	Hymenoptera	Formicidae	Formicinae	Camponotus	Camponotus herculeanus	Connor P. K. Warne	RRMFC1786-15	BOLD:AAA2372	pending	14-May-2015	Site 3 - South Field, forest edge	43.37	-80.364	312
Arthropoda	Insecta	Hymenoptera	Braconidae	Microgastrinae	Microplitis		Angela Telfer	RRMFC1813-15	BOLD:AAA2408	pending	14-May-2015	Site 3 - South Field, forest edge	43.37	-80.364	312
Arthropoda	Insecta	Hymenoptera	Braconidae	Microgastrinae	Microplitis		Angela Telfer	RRMFG2530-15	BOLD:AAA2408	pending	11-Jun-2015	Site 3 - South Field, forest edge	43.37	-80.364	312
Arthropoda	Insecta	Lepidoptera	Noctuidae	Noctuinae	Xestia	Xestia smithii	Angela Telfer	RRBFA475-15	BOLD:AAA2590	pending	01-May-2015	Site 3 - South Field, forest edge	43.37	-80.364	312
Arthropoda	Insecta	Lepidoptera	Geometridae	Larentiinae	Operophtera	Operophtera bruceata	Angela Telfer	RRSSA1970-15	BOLD:AAA2999	pending	25-May-2015	Site 1 - Field Edge Forest	43.374	-80.354	332
Arthropoda	Insecta	Hemiptera	Aphididae	Aphidinae	Aphis		Angela Telfer	RRMFG2005-15	BOLD:AAA3070	pending	11-Jun-2015	Site 3 - South Field, forest edge	43.3705	-80.3641	312
Arthropoda	Insecta	Trichoptera	Polycentropodidae	Polycentropodinae	Plectrocnemia	Plectrocnemia cinerea	Angela Telfer	RRMFG2895-15	BOLD:AAA3441	pending	11-Jun-2015	Site 3 - South Field, forest edge	43.37	-80.364	312
Arthropoda	Insecta	Diptera	Anthomyiidae	Anthomyiinae	Delia	Delia platura	Angela Telfer	RRMPG068-15	BOLD:AAA3453	pending	11-Jun-2015	Site 4 - Blair Flats, unburned prairie	43.385	-80.369	264
Arthropoda	Insecta	Diptera	Anthomyiidae	Anthomyiinae	Delia	Delia platura	Angela Telfer	RRSSA447-15	BOLD:AAA3453	pending	29-May-2015	Site 1 - Field Edge Forest	43.374	-80.354	332
Arthropoda	Insecta	Diptera	Anthomyiidae	Anthomyiinae	Delia	Delia platura	Angela Telfer	RRMPB120-15	BOLD:AAA3453	pending	07-May-2015	Site 4 - Blair Flats, unburned prairie	43.385	-80.369	264
Arthropoda	Insecta	Diptera	Anthomyiidae	Anthomyiinae	Delia	Delia platura	Angela Telfer	RRSSA385-15	BOLD:AAA3453	pending	29-May-2015	Site 1 - Field Edge Forest	43.374	-80.354	332
Arthropoda	Insecta	Diptera	Anthomyiidae	Anthomyiinae	Delia	Delia platura	Angela Telfer	RRMPA101-15	BOLD:AAA3453	pending	29-Apr-2015	Site 4 - Blair Flats, unburned prairie	43.3854	-80.369	264
Arthropoda	Insecta	Diptera	Anthomyiidae	Anthomyiinae	Delia	Delia platura	Angela Telfer	RRMFD509-15	BOLD:AAA3453	pending	21-May-2015	Site 3 - South Field, forest edge	43.37	-80.364	312
Arthropoda	Insecta	Diptera	Anthomyiidae	Anthomyiinae	Delia	Delia platura	Angela Telfer	RRSSA2525-15	BOLD:AAA3453	pending	31-May-2015	Site 1 - Field Edge Forest	43.374	-80.354	332
Arthropoda	Insecta	Diptera	Anthomyiidae	Anthomyiinae	Delia	Delia platura	Angela Telfer	RRMPA129-15	BOLD:AAA3453	pending	29-Apr-2015	Site 4 - Blair Flats, unburned prairie	43.3854	-80.369	264
Arthropoda	Insecta	Diptera	Anthomyiidae	Anthomyiinae	Delia	Delia platura	Angela Telfer	RRMPA128-15	BOLD:AAA3453	pending	29-Apr-2015	Site 4 - Blair Flats, unburned prairie	43.3854	-80.369	264
Arthropoda	Insecta	Diptera	Anthomyiidae	Anthomyiinae	Delia	Delia platura	Angela Telfer	RRSSA968-15	BOLD:AAA3453	pending	31-May-2015	Site 1 - Field Edge Forest	43.374	-80.354	332
Arthropoda	Insecta	Diptera	Anthomyiidae	Anthomyiinae	Delia	Delia platura	Angela Telfer	RRMFG2450-15	BOLD:AAA3453	pending	11-Jun-2015	Site 3 - South Field, forest edge	43.37	-80.364	312
Arthropoda	Insecta	Diptera	Anthomyiidae	Anthomyiinae	Delia	Delia platura	Angela Telfer	RRMPB007-15	BOLD:AAA3453	pending	07-May-2015	Site 4 - Blair Flats, unburned prairie	43.385	-80.369	264
Arthropoda	Insecta	Diptera	Anthomyiidae	Anthomyiinae	Delia	Delia platura	Angela Telfer	RRMPB023-15	BOLD:AAA3453	pending	07-May-2015	Site 4 - Blair Flats, unburned prairie	43.385	-80.369	264
Arthropoda	Insecta	Diptera	Anthomyiidae	Anthomyiinae	Delia	Delia platura	Angela Telfer	RRSSA3808-15	BOLD:AAA3453	pending	27-May-2015	Site 1 - Field Edge Forest	43.374	-80.354	332
Arthropoda	Insecta	Diptera	Anthomyiidae	Anthomyiinae	Delia	Delia platura	Angela Telfer	RRMPA094-15	BOLD:AAA3453	pending	29-Apr-2015	Site 4 - Blair Flats, unburned prairie	43.3854	-80.369	264
Arthropoda	Insecta	Diptera	Anthomyiidae	Anthomyiinae	Delia	Delia platura	Angela Telfer	RRMPA137-15	BOLD:AAA3453	pending	29-Apr-2015	Site 4 - Blair Flats, unburned prairie	43.3854	-80.369	264
Arthropoda	Insecta	Diptera	Anthomyiidae	Anthomyiinae	Delia	Delia platura	Angela Telfer	RRSSA439-15	BOLD:AAA3453	pending	29-May-2015	Site 1 - Field Edge Forest	43.374	-80.354	332
Arthropoda	Insecta	Diptera	Anthomyiidae	Anthomyiinae	Delia	Delia platura	Angela Telfer	RRSSA3718-15	BOLD:AAA3453	pending	27-May-2015	Site 1 - Field Edge Forest	43.374	-80.354	332
Arthropoda	Insecta	Diptera	Anthomyiidae	Anthomyiinae	Delia	Delia platura	Angela Telfer	RRMPB3154-15	BOLD:AAA3453	pending	07-May-2015	Site 4 - Blair Flats, unburned prairie	43.385	-80.369	264
Arthropoda	Insecta	Diptera	Anthomyiidae	Anthomyiinae	Delia	Delia platura	Angela Telfer	RRSSA450-15	BOLD:AAA3453	pending	29-May-2015	Site 1 - Field Edge Forest	43.374	-80.354	332
Arthropoda	Insecta	Diptera	Anthomyiidae	Anthomyiinae	Delia	Delia platura	Angela Telfer	RRMPA134-15	BOLD:AAA3453	pending	29-Apr-2015	Site 4 - Blair Flats, unburned prairie	43.3854	-80.369	264
Arthropoda	Insecta	Diptera	Anthomyiidae	Anthomyiinae	Delia	Delia platura	Angela Telfer	RRMFG2404-15	BOLD:AAA3453	pending	11-Jun-2015	Site 3 - South Field, forest edge	43.37	-80.364	312
Arthropoda	Insecta	Diptera	Anthomyiidae	Anthomyiinae	Delia	Delia platura	Angela Telfer	RRMPB029-15	BOLD:AAA3453	pending	07-May-2015	Site 4 - Blair Flats, unburned prairie	43.385	-80.369	264
Arthropoda	Insecta	Diptera	Anthomyiidae	Anthomyiinae	Delia	Delia platura	Angela Telfer	RRSSA416-15	BOLD:AAA3453	pending	29-May-2015	Site 1 - Field Edge Forest	43.374	-80.354	332
Arthropoda	Insecta	Diptera	Anthomyiidae	Anthomyiinae	Delia	Delia platura	Angela Telfer	RRSSA3816-15	BOLD:AAA3453	pending	27-May-2015	Site 1 - Field Edge Forest	43.374	-80.354	332
Arthropoda	Insecta	Diptera	Anthomyiidae	Anthomyiinae	Delia	Delia platura	Angela Telfer	RRMFG2453-15	BOLD:AAA3453	pending	11-Jun-2015	Site 3 - South Field, forest edge	43.37	-80.364	312
Arthropoda	Insecta	Diptera	Anthomyiidae	Anthomyiinae	Delia	Delia platura	Angela Telfer	RRSSA979-15	BOLD:AAA3453	pending	31-May-2015	Site 1 - Field Edge Forest	43.374	-80.354	332
Arthropoda	Insecta	Diptera	Anthomyiidae	Anthomyiinae	Delia	Delia platura	Angela Telfer	RRSSA3722-15	BOLD:AAA3453	pending	27-May-2015	Site 1 - Field Edge Forest	43.374	-80.354	332
Arthropoda	Insecta	Diptera	Anthomyiidae	Anthomyiinae	Delia	Delia platura	Angela Telfer	RRMPA104-15	BOLD:AAA3453	pending	29-Apr-2015	Site 4 - Blair Flats, unburned prairie	43.3854	-80.369	264
Arthropoda	Insecta	Diptera	Anthomyiidae	Anthomyiinae	Delia	Delia platura	Angela Telfer	RRMPA106-15	BOLD:AAA3453	pending	29-Apr-2015	Site 4 - Blair Flats, unburned prairie	43.3854	-80.369	264
Arthropoda	Insecta	Diptera	Anthomyiidae	Anthomyiinae	Delia	Delia platura	Angela Telfer	RRMPB012-15	BOLD:AAA3453	pending	07-May-2015	Site 4 - Blair Flats, unburned prairie	43.385	-80.369	264
Arthropoda	Insecta	Diptera	Anthomyiidae	Anthomyiinae	Delia	Delia platura	Angela Telfer	RRSSA1006-15	BOLD:AAA3453	pending	31-May-2015	Site 1 - Field Edge Forest	43.374	-80.354	332
Arthropoda	Insecta	Diptera	Anthomyiidae	Anthomyiinae	Delia	Delia platura	Angela Telfer	RRSSA400-15	BOLD:AAA3453	pending	29-May-2015	Site 1 - Field Edge Forest	43.374	-80.354	332
Arthropoda	Insecta	Diptera	Anthomyiidae	Anthomyiinae	Delia	Delia platura	Angela Telfer	RRSSA402-15	BOLD:AAA3453	pending	29-May-2015	Site 1 - Field Edge Forest	43.374	-80.354	332
Arthropoda	Insecta	Diptera	Anthomyiidae	Anthomyiinae	Delia	Delia platura	Angela Telfer	RRSSA978-15	BOLD:AAA3453	pending	31-May-2015	Site 1 - Field Edge Forest	43.374	-80.354	332
Arthropoda	Insecta	Diptera	Anthomyiidae	Anthomyiinae	Delia	Delia platura	Angela Telfer	RRSSA420-15	BOLD:AAA3453	pending	29-May-2015	Site 1 - Field Edge Forest	43.374	-80.354	332
Arthropoda	Insecta	Diptera	Anthomyiidae	Anthomyiinae	Delia	Delia platura	Angela Telfer	RRSSA428-15	BOLD:AAA3453	pending	29-May-2015	Site 1 - Field Edge Forest	43.374	-80.354	332
Arthropoda	Insecta	Diptera	Anthomyiidae	Anthomyiinae	Delia	Delia platura	Angela Telfer	RRSSA440-15	BOLD:AAA3453	pending	29-May-2015	Site 1 - Field Edge Forest	43.374	-80.354	332
Arthropoda	Insecta	Diptera	Anthomyiidae	Anthomyiinae	Delia	Delia platura	Angela Telfer	RRMPB017-15	BOLD:AAA3453	pending	07-May-2015	Site 4 - Blair Flats, unburned prairie	43.385	-80.369	264
Arthropoda	Insecta	Diptera	Anthomyiidae	Anthomyiinae	Delia	Delia platura	Angela Telfer	RRMPA121-15	BOLD:AAA3453	pending	29-Apr-2015	Site 4 - Blair Flats, unburned prairie	43.3854	-80.369	264
Arthropoda	Insecta	Diptera	Anthomyiidae	Anthomyiinae	Delia	Delia platura	Angela Telfer	RRMPG063-15	BOLD:AAA3453	pending	11-Jun-2015	Site 4 - Blair Flats, unburned prairie	43.385	-80.369	264
Arthropoda	Insecta	Diptera	Anthomyiidae	Anthomyiinae	Delia	Delia platura	Angela Telfer	RRMPA111-15	BOLD:AAA3453	pending	29-Apr-2015	Site 4 - Blair Flats, unburned prairie	43.3854	-80.369	264
Arthropoda	Insecta	Diptera	Anthomyiidae	Anthomyiinae	Delia	Delia platura	Angela Telfer	RRSSA2522-15	BOLD:AAA3453	pending	31-May-2015	Site 1 - Field Edge Forest	43.374	-80.354	332
Arthropoda	Insecta	Diptera	Anthomyiidae	Anthomyiinae	Delia	Delia platura	Angela Telfer	RRMPB018-15	BOLD:AAA3453	pending	07-May-2015	Site 4 - Blair Flats, unburned prairie	43.385	-80.369	264
Arthropoda	Insecta	Diptera	Anthomyiidae	Anthomyiinae	Delia	Delia platura	Angela Telfer	RRMPA117-15	BOLD:AAA3453	pending	29-Apr-2015	Site 4 - Blair Flats, unburned prairie	43.3854	-80.369	264
Arthropoda	Insecta	Diptera	Anthomyiidae	Anthomyiinae	Delia	Delia platura	Angela Telfer	RRMPA132-15	BOLD:AAA3453	pending	29-Apr-2015	Site 4 - Blair Flats, unburned prairie	43.3854	-80.369	264
Arthropoda	Insecta	Diptera	Anthomyiidae	Anthomyiinae	Delia	Delia platura	Angela Telfer	RRSSA986-15	BOLD:AAA3453	pending	31-May-2015	Site 1 - Field Edge Forest	43.374	-80.354	332
Arthropoda	Insecta	Diptera	Anthomyiidae	Anthomyiinae	Delia	Delia platura	Angela Telfer	RRMFG2446-15	BOLD:AAA3453	pending	11-Jun-2015	Site 3 - South Field, forest edge	43.37	-80.364	312
Arthropoda	Insecta	Diptera	Anthomyiidae	Anthomyiinae	Delia	Delia platura	Angela Telfer	RRSSA409-15	BOLD:AAA3453	pending	29-May-2015	Site 1 - Field Edge Forest	43.374	-80.354	332
Arthropoda	Insecta	Diptera	Anthomyiidae	Anthomyiinae	Delia	Delia platura	Angela Telfer	RRSSA3734-15	BOLD:AAA3453	pending	27-May-2015	Site 1 - Field Edge Forest	43.374	-80.354	332
Arthropoda	Insecta	Diptera	Anthomyiidae	Anthomyiinae	Delia	Delia platura	Angela Telfer	RRMPA099-15	BOLD:AAA3453	pending	29-Apr-2015	Site 4 - Blair Flats, unburned prairie	43.3854	-80.369	264
Arthropoda	Insecta	Diptera	Anthomyiidae	Anthomyiinae	Delia	Delia platura	Angela Telfer	RRSSA3719-15	BOLD:AAA3453	pending	27-May-2015	Site 1 - Field Edge Forest	43.374	-80.354	332
Arthropoda	Insecta	Diptera	Anthomyiidae	Anthomyiinae	Delia	Delia platura	Angela Telfer	RRSSA3824-15	BOLD:AAA3453	pending	27-May-2015	Site 1 - Field Edge Forest	43.374	-80.354	332
Arthropoda	Insecta	Diptera	Anthomyiidae	Anthomyiinae	Delia	Delia platura	Angela Telfer	RRMPA089-15	BOLD:AAA3453	pending	29-Apr-2015	Site 4 - Blair Flats, unburned prairie	43.3854	-80.369	264
Arthropoda	Insecta	Diptera	Anthomyiidae	Anthomyiinae	Delia	Delia platura	Angela Telfer	RRSSA401-15	BOLD:AAA3453	pending	29-May-2015	Site 1 - Field Edge Forest	43.374	-80.354	332
Arthropoda	Insecta	Diptera	Anthomyiidae	Anthomyiinae	Delia	Delia platura	Angela Telfer	RRMPB009-15	BOLD:AAA3453	pending	07-May-2015	Site 4 - Blair Flats, unburned prairie	43.385	-80.369	264
Arthropoda	Insecta	Diptera	Anthomyiidae	Anthomyiinae	Delia	Delia platura	Angela Telfer	RRMFA241-15	BOLD:AAA3453	pending	29-Apr-2015	Site 3 - South Field, forest edge	43.3705	-80.3641	312
Arthropoda	Insecta	Diptera	Anthomyiidae	Anthomyiinae	Delia	Delia platura	Angela Telfer	RRSSA417-15	BOLD:AAA3453	pending	29-May-2015	Site 1 - Field Edge Forest	43.374	-80.354	332
Arthropoda	Insecta	Diptera	Anthomyiidae	Anthomyiinae	Delia	Delia platura	Angela Telfer	RRMFC1745-15	BOLD:AAA3453	pending	14-May-2015	Site 3 - South Field, forest edge	43.37	-80.364	312
Arthropoda	Insecta	Diptera	Anthomyiidae	Anthomyiinae	Delia	Delia platura	Angela Telfer	RRMPB005-15	BOLD:AAA3453	pending	07-May-2015	Site 4 - Blair Flats, unburned prairie	43.385	-80.369	264
Arthropoda	Insecta	Diptera	Anthomyiidae	Anthomyiinae	Delia	Delia platura	Angela Telfer	RRSSA2541-15	BOLD:AAA3453	pending	31-May-2015	Site 1 - Field Edge Forest	43.374	-80.354	332
Arthropoda	Insecta	Diptera	Anthomyiidae	Anthomyiinae	Delia	Delia platura	Angela Telfer	RRSSA3711-15	BOLD:AAA3453	pending	27-May-2015	Site 1 - Field Edge Forest	43.374	-80.354	332
Arthropoda	Insecta	Diptera	Anthomyiidae	Anthomyiinae	Delia	Delia platura	Angela Telfer	RRMPB123-15	BOLD:AAA3453	pending	07-May-2015	Site 4 - Blair Flats, unburned prairie	43.385	-80.369	264
Arthropoda	Insecta	Diptera	Anthomyiidae	Anthomyiinae	Delia	Delia platura	Angela Telfer	RRSSA389-15	BOLD:AAA3453	pending	29-May-2015	Site 1 - Field Edge Forest	43.374	-80.354	332
Arthropoda	Insecta	Diptera	Anthomyiidae	Anthomyiinae	Delia	Delia platura	Angela Telfer	RRMFB1153-15	BOLD:AAA3453	pending	07-May-2015	Site 3 - South Field, forest edge	43.37	-80.364	312
Arthropoda	Insecta	Diptera	Anthomyiidae	Anthomyiinae	Delia	Delia platura	Angela Telfer	RRSSA2034-15	BOLD:AAA3453	pending	25-May-2015	Site 1 - Field Edge Forest	43.374	-80.354	332
Arthropoda	Insecta	Diptera	Anthomyiidae	Anthomyiinae	Delia	Delia platura	Angela Telfer	RRSSA436-15	BOLD:AAA3453	pending	29-May-2015	Site 1 - Field Edge Forest	43.374	-80.354	332
Arthropoda	Insecta	Diptera	Anthomyiidae	Anthomyiinae	Delia	Delia platura	Angela Telfer	RRSSA991-15	BOLD:AAA3453	pending	31-May-2015	Site 1 - Field Edge Forest	43.374	-80.354	332
Arthropoda	Insecta	Diptera	Anthomyiidae	Anthomyiinae	Delia	Delia platura	Angela Telfer	RRSSA2524-15	BOLD:AAA3453	pending	31-May-2015	Site 1 - Field Edge Forest	43.374	-80.354	332
Arthropoda	Insecta	Diptera	Anthomyiidae	Anthomyiinae	Delia	Delia platura	Angela Telfer	RRSSA405-15	BOLD:AAA3453	pending	29-May-2015	Site 1 - Field Edge Forest	43.374	-80.354	332
Arthropoda	Insecta	Diptera	Anthomyiidae	Anthomyiinae	Delia	Delia platura	Angela Telfer	RRMFG2451-15	BOLD:AAA3453	pending	11-Jun-2015	Site 3 - South Field, forest edge	43.37	-80.364	312
Arthropoda	Insecta	Diptera	Anthomyiidae	Anthomyiinae	Delia	Delia platura	Angela Telfer	RRSSA2799-15	BOLD:AAA3453	pending	31-May-2015	Site 1 - Field Edge Forest	43.374	-80.354	332
Arthropoda	Insecta	Diptera	Anthomyiidae	Anthomyiinae	Delia	Delia platura	Angela Telfer	RRSSA459-15	BOLD:AAA3453	pending	29-May-2015	Site 1 - Field Edge Forest	43.374	-80.354	332
Arthropoda	Insecta	Diptera	Anthomyiidae	Anthomyiinae	Delia	Delia platura	Angela Telfer	RRMPB014-15	BOLD:AAA3453	pending	07-May-2015	Site 4 - Blair Flats, unburned prairie	43.385	-80.369	264
Arthropoda	Insecta	Diptera	Anthomyiidae	Anthomyiinae	Delia	Delia platura	Angela Telfer	RRSSA437-15	BOLD:AAA3453	pending	29-May-2015	Site 1 - Field Edge Forest	43.374	-80.354	332
Arthropoda	Insecta	Diptera	Anthomyiidae	Anthomyiinae	Delia	Delia platura	Angela Telfer	RRMPA115-15	BOLD:AAA3453	pending	29-Apr-2015	Site 4 - Blair Flats, unburned prairie	43.3854	-80.369	264
Arthropoda	Insecta	Diptera	Anthomyiidae	Anthomyiinae	Delia	Delia platura	Angela Telfer	RRSSA983-15	BOLD:AAA3453	pending	31-May-2015	Site 1 - Field Edge Forest	43.374	-80.354	332
Arthropoda	Insecta	Diptera	Anthomyiidae	Anthomyiinae	Delia	Delia platura	Angela Telfer	RRMPG064-15	BOLD:AAA3453	pending	11-Jun-2015	Site 4 - Blair Flats, unburned prairie	43.385	-80.369	264
Arthropoda	Insecta	Diptera	Anthomyiidae	Anthomyiinae	Delia	Delia platura	Angela Telfer	RRSSA380-15	BOLD:AAA3453	pending	29-May-2015	Site 1 - Field Edge Forest	43.374	-80.354	332
Arthropoda	Insecta	Diptera	Anthomyiidae	Anthomyiinae	Delia	Delia platura	Angela Telfer	RRSSA422-15	BOLD:AAA3453	pending	29-May-2015	Site 1 - Field Edge Forest	43.374	-80.354	332
Arthropoda	Insecta	Diptera	Anthomyiidae	Anthomyiinae	Delia	Delia platura	Angela Telfer	RRMPA138-15	BOLD:AAA3453	pending	29-Apr-2015	Site 4 - Blair Flats, unburned prairie	43.3854	-80.369	264
Arthropoda	Insecta	Diptera	Anthomyiidae	Anthomyiinae	Delia	Delia platura	Angela Telfer	RRMPA118-15	BOLD:AAA3453	pending	29-Apr-2015	Site 4 - Blair Flats, unburned prairie	43.3854	-80.369	264
Arthropoda	Insecta	Diptera	Anthomyiidae	Anthomyiinae	Delia	Delia platura	Angela Telfer	RRSSA381-15	BOLD:AAA3453	pending	29-May-2015	Site 1 - Field Edge Forest	43.374	-80.354	332
Arthropoda	Insecta	Diptera	Anthomyiidae	Anthomyiinae	Delia	Delia platura	Angela Telfer	RRMPB131-15	BOLD:AAA3453	pending	07-May-2015	Site 4 - Blair Flats, unburned prairie	43.385	-80.369	264
Arthropoda	Insecta	Diptera	Anthomyiidae	Anthomyiinae	Delia	Delia platura	Angela Telfer	RRSSA415-15	BOLD:AAA3453	pending	29-May-2015	Site 1 - Field Edge Forest	43.374	-80.354	332
Arthropoda	Insecta	Diptera	Anthomyiidae	Anthomyiinae	Delia	Delia platura	Angela Telfer	RRSSA438-15	BOLD:AAA3453	pending	29-May-2015	Site 1 - Field Edge Forest	43.374	-80.354	332
Arthropoda	Insecta	Diptera	Anthomyiidae	Anthomyiinae	Delia	Delia platura	Angela Telfer	RRSSA3713-15	BOLD:AAA3453	pending	27-May-2015	Site 1 - Field Edge Forest	43.374	-80.354	332
Arthropoda	Insecta	Diptera	Anthomyiidae	Anthomyiinae	Delia	Delia platura	Angela Telfer	RRMPA109-15	BOLD:AAA3453	pending	29-Apr-2015	Site 4 - Blair Flats, unburned prairie	43.3854	-80.369	264
Arthropoda	Insecta	Diptera	Anthomyiidae	Anthomyiinae	Delia	Delia platura	Angela Telfer	RRMPB027-15	BOLD:AAA3453	pending	07-May-2015	Site 4 - Blair Flats, unburned prairie	43.385	-80.369	264
Arthropoda	Insecta	Diptera	Anthomyiidae	Anthomyiinae	Delia	Delia platura	Angela Telfer	RRMPA125-15	BOLD:AAA3453	pending	29-Apr-2015	Site 4 - Blair Flats, unburned prairie	43.3854	-80.369	264
Arthropoda	Insecta	Diptera	Anthomyiidae	Anthomyiinae	Delia	Delia platura	Angela Telfer	RRMFB1082-15	BOLD:AAA3453	pending	07-May-2015	Site 3 - South Field, forest edge	43.37	-80.364	312
Arthropoda	Insecta	Diptera	Anthomyiidae	Anthomyiinae	Delia	Delia platura	Angela Telfer	RRMFG2445-15	BOLD:AAA3453	pending	11-Jun-2015	Site 3 - South Field, forest edge	43.37	-80.364	312
Arthropoda	Insecta	Diptera	Anthomyiidae	Anthomyiinae	Delia	Delia platura	Angela Telfer	RRSSA434-15	BOLD:AAA3453	pending	29-May-2015	Site 1 - Field Edge Forest	43.374	-80.354	332
Arthropoda	Insecta	Diptera	Anthomyiidae	Anthomyiinae	Delia	Delia platura	Angela Telfer	RRSSA386-15	BOLD:AAA3453	pending	29-May-2015	Site 1 - Field Edge Forest	43.374	-80.354	332
Arthropoda	Insecta	Diptera	Anthomyiidae	Anthomyiinae	Delia	Delia platura	Angela Telfer	RRMPB124-15	BOLD:AAA3453	pending	07-May-2015	Site 4 - Blair Flats, unburned prairie	43.385	-80.369	264
Arthropoda	Insecta	Diptera	Anthomyiidae	Anthomyiinae	Delia	Delia platura	Angela Telfer	RRSSA379-15	BOLD:AAA3453	pending	29-May-2015	Site 1 - Field Edge Forest	43.374	-80.354	332
Arthropoda	Insecta	Diptera	Anthomyiidae	Anthomyiinae	Delia	Delia platura	Angela Telfer	RRMPB136-15	BOLD:AAA3453	pending	07-May-2015	Site 4 - Blair Flats, unburned prairie	43.385	-80.369	264
Arthropoda	Insecta	Diptera	Anthomyiidae	Anthomyiinae	Delia	Delia platura	Angela Telfer	RRSSA3712-15	BOLD:AAA3453	pending	27-May-2015	Site 1 - Field Edge Forest	43.374	-80.354	332
Arthropoda	Insecta	Diptera	Anthomyiidae	Anthomyiinae	Delia	Delia platura	Angela Telfer	RRMPA124-15	BOLD:AAA3453	pending	29-Apr-2015	Site 4 - Blair Flats, unburned prairie	43.3854	-80.369	264
Arthropoda	Insecta	Diptera	Anthomyiidae	Anthomyiinae	Delia	Delia platura	Angela Telfer	RRSSA981-15	BOLD:AAA3453	pending	31-May-2015	Site 1 - Field Edge Forest	43.374	-80.354	332
Arthropoda	Insecta	Diptera	Anthomyiidae	Anthomyiinae	Delia	Delia platura	Angela Telfer	RRSSA444-15	BOLD:AAA3453	pending	29-May-2015	Site 1 - Field Edge Forest	43.374	-80.354	332
Arthropoda	Insecta	Diptera	Anthomyiidae	Anthomyiinae	Delia	Delia platura	Angela Telfer	RRMPA108-15	BOLD:AAA3453	pending	29-Apr-2015	Site 4 - Blair Flats, unburned prairie	43.3854	-80.369	264
Arthropoda	Insecta	Diptera	Anthomyiidae	Anthomyiinae	Delia	Delia platura	Angela Telfer	RRMPA116-15	BOLD:AAA3453	pending	29-Apr-2015	Site 4 - Blair Flats, unburned prairie	43.3854	-80.369	264
Arthropoda	Insecta	Diptera	Anthomyiidae	Anthomyiinae	Delia	Delia platura	Angela Telfer	RRSSA980-15	BOLD:AAA3453	pending	31-May-2015	Site 1 - Field Edge Forest	43.374	-80.354	332
Arthropoda	Insecta	Diptera	Anthomyiidae	Anthomyiinae	Delia	Delia platura	Angela Telfer	RRMPB125-15	BOLD:AAA3453	pending	07-May-2015	Site 4 - Blair Flats, unburned prairie	43.385	-80.369	264
Arthropoda	Insecta	Diptera	Anthomyiidae	Anthomyiinae	Delia	Delia platura	Angela Telfer	RRSSA430-15	BOLD:AAA3453	pending	29-May-2015	Site 1 - Field Edge Forest	43.374	-80.354	332
Arthropoda	Insecta	Diptera	Anthomyiidae	Anthomyiinae	Delia	Delia platura	Angela Telfer	RRMPA135-15	BOLD:AAA3453	pending	29-Apr-2015	Site 4 - Blair Flats, unburned prairie	43.3854	-80.369	264
Arthropoda	Insecta	Diptera	Anthomyiidae	Anthomyiinae	Delia	Delia platura	Angela Telfer	RRSSA992-15	BOLD:AAA3453	pending	31-May-2015	Site 1 - Field Edge Forest	43.374	-80.354	332
Arthropoda	Insecta	Diptera	Anthomyiidae	Anthomyiinae	Delia	Delia platura	Angela Telfer	RRMPG065-15	BOLD:AAA3453	pending	11-Jun-2015	Site 4 - Blair Flats, unburned prairie	43.385	-80.369	264
Arthropoda	Insecta	Diptera	Anthomyiidae	Anthomyiinae	Delia	Delia platura	Angela Telfer	RRSSA1028-15	BOLD:AAA3453	pending	31-May-2015	Site 1 - Field Edge Forest	43.374	-80.354	332
Arthropoda	Insecta	Diptera	Anthomyiidae	Anthomyiinae	Delia	Delia platura	Angela Telfer	RRSSA967-15	BOLD:AAA3453	pending	31-May-2015	Site 1 - Field Edge Forest	43.374	-80.354	332
Arthropoda	Insecta	Diptera	Anthomyiidae	Anthomyiinae	Delia	Delia platura	Angela Telfer	RRMPB147-15	BOLD:AAA3453	pending	07-May-2015	Site 4 - Blair Flats, unburned prairie	43.385	-80.369	264
Arthropoda	Insecta	Diptera	Anthomyiidae	Anthomyiinae	Delia	Delia platura	Angela Telfer	RRSSA3780-15	BOLD:AAA3453	pending	27-May-2015	Site 1 - Field Edge Forest	43.374	-80.354	332
Arthropoda	Insecta	Diptera	Anthomyiidae	Anthomyiinae	Delia	Delia platura	Angela Telfer	RRSSA441-15	BOLD:AAA3453	pending	29-May-2015	Site 1 - Field Edge Forest	43.374	-80.354	332
Arthropoda	Insecta	Diptera	Anthomyiidae	Anthomyiinae	Delia	Delia platura	Angela Telfer	RRSSA1003-15	BOLD:AAA3453	pending	31-May-2015	Site 1 - Field Edge Forest	43.374	-80.354	332
Arthropoda	Insecta	Diptera	Anthomyiidae	Anthomyiinae	Delia	Delia platura	Angela Telfer	RRSSA383-15	BOLD:AAA3453	pending	29-May-2015	Site 1 - Field Edge Forest	43.374	-80.354	332
Arthropoda	Insecta	Diptera	Anthomyiidae	Anthomyiinae	Delia	Delia platura	Angela Telfer	RRMPA126-15	BOLD:AAA3453	pending	29-Apr-2015	Site 4 - Blair Flats, unburned prairie	43.3854	-80.369	264
Arthropoda	Insecta	Diptera	Anthomyiidae	Anthomyiinae	Delia	Delia platura	Angela Telfer	RRMPB130-15	BOLD:AAA3453	pending	07-May-2015	Site 4 - Blair Flats, unburned prairie	43.385	-80.369	264
Arthropoda	Insecta	Diptera	Anthomyiidae	Anthomyiinae	Delia	Delia platura	Angela Telfer	RRSSA408-15	BOLD:AAA3453	pending	29-May-2015	Site 1 - Field Edge Forest	43.374	-80.354	332
Arthropoda	Insecta	Diptera	Anthomyiidae	Anthomyiinae	Delia	Delia platura	Angela Telfer	RRSSA965-15	BOLD:AAA3453	pending	31-May-2015	Site 1 - Field Edge Forest	43.374	-80.354	332
Arthropoda	Insecta	Diptera	Anthomyiidae	Anthomyiinae	Delia	Delia platura	Angela Telfer	RRSSA3723-15	BOLD:AAA3453	pending	27-May-2015	Site 1 - Field Edge Forest	43.374	-80.354	332
Arthropoda	Insecta	Diptera	Anthomyiidae	Anthomyiinae	Delia	Delia platura	Angela Telfer	RRMPB008-15	BOLD:AAA3453	pending	07-May-2015	Site 4 - Blair Flats, unburned prairie	43.385	-80.369	264
Arthropoda	Insecta	Diptera	Anthomyiidae	Anthomyiinae	Delia	Delia platura	Angela Telfer	RRSSA433-15	BOLD:AAA3453	pending	29-May-2015	Site 1 - Field Edge Forest	43.374	-80.354	332
Arthropoda	Insecta	Diptera	Anthomyiidae	Anthomyiinae	Delia	Delia platura	Angela Telfer	RRSSA977-15	BOLD:AAA3453	pending	31-May-2015	Site 1 - Field Edge Forest	43.374	-80.354	332
Arthropoda	Insecta	Diptera	Anthomyiidae	Anthomyiinae	Delia	Delia platura	Angela Telfer	RRSSA3790-15	BOLD:AAA3453	pending	27-May-2015	Site 1 - Field Edge Forest	43.374	-80.354	332
Arthropoda	Insecta	Diptera	Anthomyiidae	Anthomyiinae	Delia	Delia platura	Angela Telfer	RRSSA3710-15	BOLD:AAA3453	pending	27-May-2015	Site 1 - Field Edge Forest	43.374	-80.354	332
Arthropoda	Insecta	Diptera	Anthomyiidae	Anthomyiinae	Delia	Delia platura	Angela Telfer	RRMPA123-15	BOLD:AAA3453	pending	29-Apr-2015	Site 4 - Blair Flats, unburned prairie	43.3854	-80.369	264
Arthropoda	Insecta	Diptera	Anthomyiidae	Anthomyiinae	Delia	Delia platura	Angela Telfer	RRSSA453-15	BOLD:AAA3453	pending	29-May-2015	Site 1 - Field Edge Forest	43.374	-80.354	332
Arthropoda	Insecta	Diptera	Anthomyiidae	Anthomyiinae	Delia	Delia platura	Angela Telfer	RRSSA976-15	BOLD:AAA3453	pending	31-May-2015	Site 1 - Field Edge Forest	43.374	-80.354	332
Arthropoda	Insecta	Diptera	Anthomyiidae	Anthomyiinae	Delia	Delia platura	Angela Telfer	RRSSA398-15	BOLD:AAA3453	pending	29-May-2015	Site 1 - Field Edge Forest	43.374	-80.354	332
Arthropoda	Insecta	Diptera	Anthomyiidae	Anthomyiinae	Delia	Delia platura	Angela Telfer	RRSSA388-15	BOLD:AAA3453	pending	29-May-2015	Site 1 - Field Edge Forest	43.374	-80.354	332
Arthropoda	Insecta	Diptera	Anthomyiidae	Anthomyiinae	Delia	Delia platura	Angela Telfer	RRSSA1004-15	BOLD:AAA3453	pending	31-May-2015	Site 1 - Field Edge Forest	43.374	-80.354	332
Arthropoda	Insecta	Diptera	Anthomyiidae	Anthomyiinae	Delia	Delia platura	Angela Telfer	RRMPA136-15	BOLD:AAA3453	pending	29-Apr-2015	Site 4 - Blair Flats, unburned prairie	43.3854	-80.369	264
Arthropoda	Insecta	Diptera	Anthomyiidae	Anthomyiinae	Delia	Delia platura	Angela Telfer	RRMPE351-15	BOLD:AAA3453	pending	27-May-2015	Site 4 - Blair Flats, unburned prairie	43.385	-80.369	264
Arthropoda	Insecta	Diptera	Anthomyiidae	Anthomyiinae	Delia	Delia platura	Angela Telfer	RRSSA993-15	BOLD:AAA3453	pending	31-May-2015	Site 1 - Field Edge Forest	43.374	-80.354	332
Arthropoda	Insecta	Diptera	Anthomyiidae	Anthomyiinae	Delia	Delia platura	Angela Telfer	RRMPB026-15	BOLD:AAA3453	pending	07-May-2015	Site 4 - Blair Flats, unburned prairie	43.385	-80.369	264
Arthropoda	Insecta	Diptera	Anthomyiidae	Anthomyiinae	Delia	Delia platura	Angela Telfer	RRMPA112-15	BOLD:AAA3453	pending	29-Apr-2015	Site 4 - Blair Flats, unburned prairie	43.3854	-80.369	264
Arthropoda	Insecta	Diptera	Anthomyiidae	Anthomyiinae	Delia	Delia platura	Angela Telfer	RRSSA423-15	BOLD:AAA3453	pending	29-May-2015	Site 1 - Field Edge Forest	43.374	-80.354	332
Arthropoda	Insecta	Diptera	Anthomyiidae	Anthomyiinae	Delia	Delia platura	Angela Telfer	RRSSA3714-15	BOLD:AAA3453	pending	27-May-2015	Site 1 - Field Edge Forest	43.374	-80.354	332
Arthropoda	Insecta	Diptera	Anthomyiidae	Anthomyiinae	Delia	Delia platura	Angela Telfer	RRMPB020-15	BOLD:AAA3453	pending	07-May-2015	Site 4 - Blair Flats, unburned prairie	43.385	-80.369	264
Arthropoda	Insecta	Diptera	Anthomyiidae	Anthomyiinae	Delia	Delia platura	Angela Telfer	RRSSA446-15	BOLD:AAA3453	pending	29-May-2015	Site 1 - Field Edge Forest	43.374	-80.354	332
Arthropoda	Insecta	Diptera	Anthomyiidae	Anthomyiinae	Delia	Delia platura	Angela Telfer	RRSSA2027-15	BOLD:AAA3453	pending	25-May-2015	Site 1 - Field Edge Forest	43.374	-80.354	332
Arthropoda	Insecta	Diptera	Anthomyiidae	Anthomyiinae	Delia	Delia platura	Angela Telfer	RRSSA382-15	BOLD:AAA3453	pending	29-May-2015	Site 1 - Field Edge Forest	43.374	-80.354	332
Arthropoda	Insecta	Diptera	Anthomyiidae	Anthomyiinae	Delia	Delia platura	Angela Telfer	RRMPA127-15	BOLD:AAA3453	pending	29-Apr-2015	Site 4 - Blair Flats, unburned prairie	43.3854	-80.369	264
Arthropoda	Insecta	Diptera	Anthomyiidae	Anthomyiinae	Delia	Delia platura	Angela Telfer	RRMPE352-15	BOLD:AAA3453	pending	27-May-2015	Site 4 - Blair Flats, unburned prairie	43.385	-80.369	264
Arthropoda	Insecta	Diptera	Anthomyiidae	Anthomyiinae	Delia	Delia platura	Angela Telfer	RRMPA092-15	BOLD:AAA3453	pending	29-Apr-2015	Site 4 - Blair Flats, unburned prairie	43.3854	-80.369	264
Arthropoda	Insecta	Diptera	Anthomyiidae	Anthomyiinae	Delia	Delia platura	Angela Telfer	RRSSA969-15	BOLD:AAA3453	pending	31-May-2015	Site 1 - Field Edge Forest	43.374	-80.354	332
Arthropoda	Insecta	Diptera	Anthomyiidae	Anthomyiinae	Delia	Delia platura	Angela Telfer	RRSSA3731-15	BOLD:AAA3453	pending	27-May-2015	Site 1 - Field Edge Forest	43.374	-80.354	332
Arthropoda	Insecta	Diptera	Anthomyiidae	Anthomyiinae	Delia	Delia platura	Angela Telfer	RRMPA087-15	BOLD:AAA3453	pending	29-Apr-2015	Site 4 - Blair Flats, unburned prairie	43.3854	-80.369	264
Arthropoda	Insecta	Diptera	Anthomyiidae	Anthomyiinae	Delia	Delia platura	Angela Telfer	RRSSA1009-15	BOLD:AAA3453	pending	31-May-2015	Site 1 - Field Edge Forest	43.374	-80.354	332
Arthropoda	Insecta	Diptera	Anthomyiidae	Anthomyiinae	Delia	Delia platura	Angela Telfer	RRMFA242-15	BOLD:AAA3453	pending	29-Apr-2015	Site 3 - South Field, forest edge	43.3705	-80.3641	312
Arthropoda	Insecta	Diptera	Anthomyiidae	Anthomyiinae	Delia	Delia platura	Angela Telfer	RRMPB127-15	BOLD:AAA3453	pending	07-May-2015	Site 4 - Blair Flats, unburned prairie	43.385	-80.369	264
Arthropoda	Insecta	Diptera	Anthomyiidae	Anthomyiinae	Delia	Delia platura	Angela Telfer	RRSSA999-15	BOLD:AAA3453	pending	31-May-2015	Site 1 - Field Edge Forest	43.374	-80.354	332
Arthropoda	Insecta	Diptera	Anthomyiidae	Anthomyiinae	Delia	Delia platura	Angela Telfer	RRSSA3716-15	BOLD:AAA3453	pending	27-May-2015	Site 1 - Field Edge Forest	43.374	-80.354	332
Arthropoda	Insecta	Diptera	Anthomyiidae	Anthomyiinae	Delia	Delia platura	Angela Telfer	RRSSA966-15	BOLD:AAA3453	pending	31-May-2015	Site 1 - Field Edge Forest	43.374	-80.354	332
Arthropoda	Insecta	Diptera	Anthomyiidae	Anthomyiinae	Delia	Delia platura	Angela Telfer	RRMPA090-15	BOLD:AAA3453	pending	29-Apr-2015	Site 4 - Blair Flats, unburned prairie	43.3854	-80.369	264
Arthropoda	Insecta	Diptera	Anthomyiidae	Anthomyiinae	Delia	Delia platura	Angela Telfer	RRSSA3725-15	BOLD:AAA3453	pending	27-May-2015	Site 1 - Field Edge Forest	43.374	-80.354	332
Arthropoda	Insecta	Diptera	Anthomyiidae	Anthomyiinae	Delia	Delia platura	Angela Telfer	RRMPA088-15	BOLD:AAA3453	pending	29-Apr-2015	Site 4 - Blair Flats, unburned prairie	43.3854	-80.369	264
Arthropoda	Insecta	Diptera	Anthomyiidae	Anthomyiinae	Delia	Delia platura	Angela Telfer	RRMPA113-15	BOLD:AAA3453	pending	29-Apr-2015	Site 4 - Blair Flats, unburned prairie	43.3854	-80.369	264
Arthropoda	Insecta	Diptera	Anthomyiidae	Anthomyiinae	Delia	Delia platura	Angela Telfer	RRMPB4129-15	BOLD:AAA3453	pending	07-May-2015	Site 4 - Blair Flats, unburned prairie	43.385	-80.369	264
Arthropoda	Insecta	Diptera	Anthomyiidae	Anthomyiinae	Delia	Delia platura	Angela Telfer	RRSSA396-15	BOLD:AAA3453	pending	29-May-2015	Site 1 - Field Edge Forest	43.374	-80.354	332
Arthropoda	Insecta	Diptera	Anthomyiidae	Anthomyiinae	Delia	Delia platura	Angela Telfer	RRSSA3727-15	BOLD:AAA3453	pending	27-May-2015	Site 1 - Field Edge Forest	43.374	-80.354	332
Arthropoda	Insecta	Diptera	Anthomyiidae	Anthomyiinae	Delia	Delia platura	Angela Telfer	RRMPA103-15	BOLD:AAA3453	pending	29-Apr-2015	Site 4 - Blair Flats, unburned prairie	43.3854	-80.369	264
Arthropoda	Insecta	Diptera	Anthomyiidae	Anthomyiinae	Delia	Delia platura	Angela Telfer	RRMFB1196-15	BOLD:AAA3453	pending	07-May-2015	Site 3 - South Field, forest edge	43.37	-80.364	312
Arthropoda	Insecta	Diptera	Anthomyiidae	Anthomyiinae	Delia	Delia platura	Angela Telfer	RRMFG3103-15	BOLD:AAA3453	pending	11-Jun-2015	Site 3 - South Field, forest edge	43.37	-80.364	312
Arthropoda	Insecta	Diptera	Anthomyiidae	Anthomyiinae	Delia	Delia platura	Angela Telfer	RRMPA086-15	BOLD:AAA3453	pending	29-Apr-2015	Site 4 - Blair Flats, unburned prairie	43.3854	-80.369	264
Arthropoda	Insecta	Diptera	Anthomyiidae	Anthomyiinae	Delia	Delia platura	Angela Telfer	RRMPB011-15	BOLD:AAA3453	pending	07-May-2015	Site 4 - Blair Flats, unburned prairie	43.385	-80.369	264
Arthropoda	Insecta	Diptera	Anthomyiidae	Anthomyiinae	Delia	Delia platura	Angela Telfer	RRMFE965-15	BOLD:AAA3453	pending	27-May-2015	Site 3 - South Field, forest edge	43.37	-80.364	312
Arthropoda	Insecta	Diptera	Anthomyiidae	Anthomyiinae	Delia	Delia platura	Angela Telfer	RRMPA091-15	BOLD:AAA3453	pending	29-Apr-2015	Site 4 - Blair Flats, unburned prairie	43.3854	-80.369	264
Arthropoda	Insecta	Diptera	Anthomyiidae	Anthomyiinae	Delia	Delia platura	Angela Telfer	RRSSA2523-15	BOLD:AAA3453	pending	31-May-2015	Site 1 - Field Edge Forest	43.374	-80.354	332
Arthropoda	Insecta	Diptera	Anthomyiidae	Anthomyiinae	Delia	Delia platura	Angela Telfer	RRMFB1192-15	BOLD:AAA3453	pending	07-May-2015	Site 3 - South Field, forest edge	43.37	-80.364	312
Arthropoda	Insecta	Diptera	Anthomyiidae	Anthomyiinae	Delia	Delia platura	Angela Telfer	RRSSA399-15	BOLD:AAA3453	pending	29-May-2015	Site 1 - Field Edge Forest	43.374	-80.354	332
Arthropoda	Insecta	Diptera	Anthomyiidae	Anthomyiinae	Delia	Delia platura	Angela Telfer	RRSSA3726-15	BOLD:AAA3453	pending	27-May-2015	Site 1 - Field Edge Forest	43.374	-80.354	332
Arthropoda	Insecta	Diptera	Anthomyiidae	Anthomyiinae	Delia	Delia platura	Angela Telfer	RRMPA093-15	BOLD:AAA3453	pending	29-Apr-2015	Site 4 - Blair Flats, unburned prairie	43.3854	-80.369	264
Arthropoda	Insecta	Diptera	Anthomyiidae	Anthomyiinae	Delia	Delia platura	Angela Telfer	RRSSA435-15	BOLD:AAA3453	pending	29-May-2015	Site 1 - Field Edge Forest	43.374	-80.354	332
Arthropoda	Insecta	Diptera	Anthomyiidae	Anthomyiinae	Delia	Delia platura	Angela Telfer	RRSSA3815-15	BOLD:AAA3453	pending	27-May-2015	Site 1 - Field Edge Forest	43.374	-80.354	332
Arthropoda	Insecta	Diptera	Anthomyiidae	Anthomyiinae	Delia	Delia platura	Angela Telfer	RRMPB016-15	BOLD:AAA3453	pending	07-May-2015	Site 4 - Blair Flats, unburned prairie	43.385	-80.369	264
Arthropoda	Insecta	Diptera	Anthomyiidae	Anthomyiinae	Delia	Delia platura	Angela Telfer	RRMPA131-15	BOLD:AAA3453	pending	29-Apr-2015	Site 4 - Blair Flats, unburned prairie	43.3854	-80.369	264
Arthropoda	Insecta	Diptera	Anthomyiidae	Anthomyiinae	Delia	Delia platura	Angela Telfer	RRSSA442-15	BOLD:AAA3453	pending	29-May-2015	Site 1 - Field Edge Forest	43.374	-80.354	332
Arthropoda	Insecta	Diptera	Anthomyiidae	Anthomyiinae	Delia	Delia platura	Angela Telfer	RRSSA432-15	BOLD:AAA3453	pending	29-May-2015	Site 1 - Field Edge Forest	43.374	-80.354	332
Arthropoda	Insecta	Diptera	Anthomyiidae	Anthomyiinae	Delia	Delia platura	Angela Telfer	RRSSA424-15	BOLD:AAA3453	pending	29-May-2015	Site 1 - Field Edge Forest	43.374	-80.354	332
Arthropoda	Insecta	Diptera	Anthomyiidae	Anthomyiinae	Delia	Delia platura	Angela Telfer	RRMPA096-15	BOLD:AAA3453	pending	29-Apr-2015	Site 4 - Blair Flats, unburned prairie	43.3854	-80.369	264
Arthropoda	Insecta	Diptera	Anthomyiidae	Anthomyiinae	Delia	Delia platura	Angela Telfer	RRMPB019-15	BOLD:AAA3453	pending	07-May-2015	Site 4 - Blair Flats, unburned prairie	43.385	-80.369	264
Arthropoda	Insecta	Diptera	Anthomyiidae	Anthomyiinae	Delia	Delia platura	Angela Telfer	RRMFC1735-15	BOLD:AAA3453	pending	14-May-2015	Site 3 - South Field, forest edge	43.37	-80.364	312
Arthropoda	Insecta	Diptera	Anthomyiidae	Anthomyiinae	Delia	Delia platura	Angela Telfer	RRSSA3814-15	BOLD:AAA3453	pending	27-May-2015	Site 1 - Field Edge Forest	43.374	-80.354	332
Arthropoda	Insecta	Diptera	Anthomyiidae	Anthomyiinae	Delia	Delia platura	Angela Telfer	RRMFG2905-15	BOLD:AAA3453	pending	11-Jun-2015	Site 3 - South Field, forest edge	43.37	-80.364	312
Arthropoda	Insecta	Diptera	Anthomyiidae	Anthomyiinae	Delia	Delia platura	Angela Telfer	RRSSA419-15	BOLD:AAA3453	pending	29-May-2015	Site 1 - Field Edge Forest	43.374	-80.354	332
Arthropoda	Insecta	Diptera	Anthomyiidae	Anthomyiinae	Delia	Delia platura	Angela Telfer	RRMPA102-15	BOLD:AAA3453	pending	29-Apr-2015	Site 4 - Blair Flats, unburned prairie	43.3854	-80.369	264
Arthropoda	Insecta	Diptera	Anthomyiidae	Anthomyiinae	Delia	Delia platura	Angela Telfer	RRMPA098-15	BOLD:AAA3453	pending	29-Apr-2015	Site 4 - Blair Flats, unburned prairie	43.3854	-80.369	264
Arthropoda	Insecta	Diptera	Anthomyiidae	Anthomyiinae	Delia	Delia platura	Angela Telfer	RRMPA130-15	BOLD:AAA3453	pending	29-Apr-2015	Site 4 - Blair Flats, unburned prairie	43.3854	-80.369	264
Arthropoda	Insecta	Diptera	Anthomyiidae	Anthomyiinae	Delia	Delia platura	Angela Telfer	RRMFB1195-15	BOLD:AAA3453	pending	07-May-2015	Site 3 - South Field, forest edge	43.37	-80.364	312
Arthropoda	Insecta	Diptera	Anthomyiidae	Anthomyiinae	Delia	Delia platura	Angela Telfer	RRSSA443-15	BOLD:AAA3453	pending	29-May-2015	Site 1 - Field Edge Forest	43.374	-80.354	332
Arthropoda	Insecta	Diptera	Anthomyiidae	Anthomyiinae	Delia	Delia platura	Angela Telfer	RRSSA418-15	BOLD:AAA3453	pending	29-May-2015	Site 1 - Field Edge Forest	43.374	-80.354	332
Arthropoda	Insecta	Diptera	Anthomyiidae	Anthomyiinae	Delia	Delia platura	Angela Telfer	RRSSA3818-15	BOLD:AAA3453	pending	27-May-2015	Site 1 - Field Edge Forest	43.374	-80.354	332
Arthropoda	Insecta	Diptera	Anthomyiidae	Anthomyiinae	Delia	Delia platura	Angela Telfer	RRMPA105-15	BOLD:AAA3453	pending	29-Apr-2015	Site 4 - Blair Flats, unburned prairie	43.3854	-80.369	264
Arthropoda	Insecta	Diptera	Anthomyiidae	Anthomyiinae	Delia	Delia platura	Angela Telfer	RRMPB024-15	BOLD:AAA3453	pending	07-May-2015	Site 4 - Blair Flats, unburned prairie	43.385	-80.369	264
Arthropoda	Insecta	Diptera	Anthomyiidae	Anthomyiinae	Delia	Delia platura	Angela Telfer	RRSSA989-15	BOLD:AAA3453	pending	31-May-2015	Site 1 - Field Edge Forest	43.374	-80.354	332
Arthropoda	Insecta	Diptera	Anthomyiidae	Anthomyiinae	Delia	Delia platura	Angela Telfer	RRMPA095-15	BOLD:AAA3453	pending	29-Apr-2015	Site 4 - Blair Flats, unburned prairie	43.3854	-80.369	264
Arthropoda	Insecta	Diptera	Anthomyiidae	Anthomyiinae	Delia	Delia platura	Angela Telfer	RRSSA3721-15	BOLD:AAA3453	pending	27-May-2015	Site 1 - Field Edge Forest	43.374	-80.354	332
Arthropoda	Insecta	Diptera	Anthomyiidae	Anthomyiinae	Delia	Delia platura	Angela Telfer	RRSSA421-15	BOLD:AAA3453	pending	29-May-2015	Site 1 - Field Edge Forest	43.374	-80.354	332
Arthropoda	Insecta	Diptera	Anthomyiidae	Anthomyiinae	Delia	Delia platura	Angela Telfer	RRMPA110-15	BOLD:AAA3453	pending	29-Apr-2015	Site 4 - Blair Flats, unburned prairie	43.3854	-80.369	264
Arthropoda	Insecta	Diptera	Anthomyiidae	Anthomyiinae	Delia	Delia platura	Angela Telfer	RRSSA445-15	BOLD:AAA3453	pending	29-May-2015	Site 1 - Field Edge Forest	43.374	-80.354	332
Arthropoda	Insecta	Diptera	Anthomyiidae	Anthomyiinae	Delia	Delia platura	Angela Telfer	RRSSA985-15	BOLD:AAA3453	pending	31-May-2015	Site 1 - Field Edge Forest	43.374	-80.354	332
Arthropoda	Insecta	Diptera	Anthomyiidae	Anthomyiinae	Delia	Delia platura	Angela Telfer	RRSSA387-15	BOLD:AAA3453	pending	29-May-2015	Site 1 - Field Edge Forest	43.374	-80.354	332
Arthropoda	Insecta	Diptera	Anthomyiidae	Anthomyiinae	Delia	Delia platura	Angela Telfer	RRSSA427-15	BOLD:AAA3453	pending	29-May-2015	Site 1 - Field Edge Forest	43.374	-80.354	332
Arthropoda	Insecta	Diptera	Anthomyiidae	Anthomyiinae	Delia	Delia platura	Angela Telfer	RRSSA448-15	BOLD:AAA3453	pending	29-May-2015	Site 1 - Field Edge Forest	43.374	-80.354	332
Arthropoda	Insecta	Diptera	Anthomyiidae	Anthomyiinae	Delia	Delia platura	Angela Telfer	RRSSA3829-15	BOLD:AAA3453	pending	27-May-2015	Site 1 - Field Edge Forest	43.374	-80.354	332
Arthropoda	Insecta	Diptera	Anthomyiidae	Anthomyiinae	Delia	Delia platura	Angela Telfer	RRMPB121-15	BOLD:AAA3453	pending	07-May-2015	Site 4 - Blair Flats, unburned prairie	43.385	-80.369	264
Arthropoda	Insecta	Diptera	Anthomyiidae	Anthomyiinae	Delia	Delia platura	Angela Telfer	RRMPA107-15	BOLD:AAA3453	pending	29-Apr-2015	Site 4 - Blair Flats, unburned prairie	43.3854	-80.369	264
Arthropoda	Insecta	Diptera	Anthomyiidae	Anthomyiinae	Delia	Delia platura	Angela Telfer	RRSSA384-15	BOLD:AAA3453	pending	29-May-2015	Site 1 - Field Edge Forest	43.374	-80.354	332
Arthropoda	Insecta	Diptera	Anthomyiidae	Anthomyiinae	Delia	Delia platura	Angela Telfer	RRSSA395-15	BOLD:AAA3453	pending	29-May-2015	Site 1 - Field Edge Forest	43.374	-80.354	332
Arthropoda	Insecta	Diptera	Anthomyiidae	Anthomyiinae	Delia	Delia platura	Angela Telfer	RRMPB129-15	BOLD:AAA3453	pending	07-May-2015	Site 4 - Blair Flats, unburned prairie	43.385	-80.369	264
Arthropoda	Insecta	Diptera	Anthomyiidae	Anthomyiinae	Delia	Delia platura	Angela Telfer	RRMPA119-15	BOLD:AAA3453	pending	29-Apr-2015	Site 4 - Blair Flats, unburned prairie	43.3854	-80.369	264
Arthropoda	Insecta	Diptera	Anthomyiidae	Anthomyiinae	Delia	Delia platura	Angela Telfer	RRSSA1005-15	BOLD:AAA3453	pending	31-May-2015	Site 1 - Field Edge Forest	43.374	-80.354	332
Arthropoda	Insecta	Diptera	Anthomyiidae	Anthomyiinae	Delia	Delia platura	Angela Telfer	RRMPA114-15	BOLD:AAA3453	pending	29-Apr-2015	Site 4 - Blair Flats, unburned prairie	43.3854	-80.369	264
Arthropoda	Insecta	Diptera	Anthomyiidae	Anthomyiinae	Delia	Delia platura	Angela Telfer	RRSSA994-15	BOLD:AAA3453	pending	31-May-2015	Site 1 - Field Edge Forest	43.374	-80.354	332
Arthropoda	Insecta	Trichoptera	Hydropsychidae		Ceratopsyche	Ceratopsyche morosa	Jayme E. Sones	RRMPD078-15	BOLD:AAA3679	pending	21-May-2015	Site 4 - Blair Flats, unburned prairie	43.385	-80.369	264
Arthropoda	Insecta	Trichoptera	Hydropsychidae		Ceratopsyche	Ceratopsyche morosa	Jayme E. Sones	RRMPG058-15	BOLD:AAA3679	pending	11-Jun-2015	Site 4 - Blair Flats, unburned prairie	43.385	-80.369	264
Arthropoda	Insecta	Diptera	Culicidae	Culicinae			Angela Telfer	RRSSA2000-15	BOLD:AAA3748	pending	25-May-2015	Site 1 - Field Edge Forest	43.374	-80.354	332
Arthropoda	Insecta	Hymenoptera	Halictidae	Halictinae	Lasioglossum		Angela Telfer	RRMFE2393-15	BOLD:AAA3782	pending	27-May-2015	Site 3 - South Field, forest edge	43.3705	-80.3641	312
Arthropoda	Insecta	Hymenoptera	Halictidae	Halictinae	Lasioglossum		Angela Telfer	RRMFG2959-15	BOLD:AAA3782	pending	11-Jun-2015	Site 3 - South Field, forest edge	43.37	-80.364	312
Arthropoda	Insecta	Lepidoptera	Geometridae	Larentiinae	Xanthorhoe	Xanthorhoe ferrugata	Angela Telfer	RRMFE2994-15	BOLD:AAA3817	pending	27-May-2015	Site 3 - South Field, forest edge	43.3705	-80.3641	312
Arthropoda	Insecta	Lepidoptera	Geometridae	Larentiinae	Xanthorhoe	Xanthorhoe ferrugata	Angela Telfer	RRMFD572-15	BOLD:AAA3817	pending	21-May-2015	Site 3 - South Field, forest edge	43.37	-80.364	312
Arthropoda	Insecta	Lepidoptera	Geometridae	Larentiinae	Xanthorhoe	Xanthorhoe ferrugata	Angela Telfer	RRMFE2991-15	BOLD:AAA3817	pending	27-May-2015	Site 3 - South Field, forest edge	43.3705	-80.3641	312
Arthropoda	Insecta	Lepidoptera	Geometridae	Larentiinae	Xanthorhoe	Xanthorhoe ferrugata	Angela Telfer	RRMFD570-15	BOLD:AAA3817	pending	21-May-2015	Site 3 - South Field, forest edge	43.37	-80.364	312
Arthropoda	Insecta	Lepidoptera	Geometridae	Larentiinae	Xanthorhoe	Xanthorhoe ferrugata	Angela Telfer	RRMPD075-15	BOLD:AAA3817	pending	21-May-2015	Site 4 - Blair Flats, unburned prairie	43.385	-80.369	264
Arthropoda	Insecta	Lepidoptera	Geometridae	Larentiinae	Xanthorhoe	Xanthorhoe ferrugata	Angela Telfer	RRMFE2999-15	BOLD:AAA3817	pending	27-May-2015	Site 3 - South Field, forest edge	43.3705	-80.3641	312
Arthropoda	Insecta	Lepidoptera	Geometridae	Larentiinae	Xanthorhoe	Xanthorhoe ferrugata	Angela Telfer	RRMFD568-15	BOLD:AAA3817	pending	21-May-2015	Site 3 - South Field, forest edge	43.37	-80.364	312
Arthropoda	Insecta	Lepidoptera	Geometridae	Larentiinae	Xanthorhoe	Xanthorhoe ferrugata	Angela Telfer	RRMPD074-15	BOLD:AAA3817	pending	21-May-2015	Site 4 - Blair Flats, unburned prairie	43.385	-80.369	264
Arthropoda	Insecta	Lepidoptera	Geometridae	Larentiinae	Xanthorhoe	Xanthorhoe ferrugata	Angela Telfer	RRMFE2998-15	BOLD:AAA3817	pending	27-May-2015	Site 3 - South Field, forest edge	43.3705	-80.3641	312
Arthropoda	Insecta	Trichoptera	Hydropsychidae	Hydropsychinae	Cheumatopsyche	Cheumatopsyche campyla	Jayme E. Sones	RRMFG2495-15	BOLD:AAA3892	pending	11-Jun-2015	Site 3 - South Field, forest edge	43.37	-80.364	312
Arthropoda	Insecta	Hymenoptera	Formicidae	Dolichoderinae	Tapinoma	Tapinoma sessile	Angela Telfer	RRMFB895-15	BOLD:AAA3893	pending	07-May-2015	Site 3 - South Field, forest edge	43.3705	-80.3641	312
Arthropoda	Insecta	Hymenoptera	Formicidae	Dolichoderinae	Tapinoma	Tapinoma sessile	Angela Telfer	RRMFG2840-15	BOLD:AAA3900	pending	11-Jun-2015	Site 3 - South Field, forest edge	43.37	-80.364	312
Arthropoda	Insecta	Hymenoptera	Formicidae	Dolichoderinae	Tapinoma	Tapinoma sessile	Angela Telfer	RRMFG2968-15	BOLD:AAA3900	pending	11-Jun-2015	Site 3 - South Field, forest edge	43.37	-80.364	312
Arthropoda	Insecta	Lepidoptera	Noctuidae	Herminiinae	Palthis	Palthis angulalis	Angela Telfer	RRMFE3000-15	BOLD:AAA3933	pending	27-May-2015	Site 3 - South Field, forest edge	43.3705	-80.3641	312
Arthropoda	Insecta	Lepidoptera	Geometridae	Ennominae	Plagodis	Plagodis phlogosaria	Jayme E. Sones	RRMFC1988-15	BOLD:AAA3984	pending	14-May-2015	Site 3 - South Field, forest edge	43.37	-80.364	312
Arthropoda	Insecta	Lepidoptera	Noctuidae	Noctuinae	Euplexia	Euplexia benesimilis	Angela Telfer	RRMFE2990-15	BOLD:AAA4097	pending	27-May-2015	Site 3 - South Field, forest edge	43.3705	-80.3641	312
Arthropoda	Insecta	Lepidoptera	Tortricidae	Tortricinae	Argyrotaenia	Argyrotaenia mariana	Angela Telfer	RRMFE939-15	BOLD:AAA4119	pending	27-May-2015	Site 3 - South Field, forest edge	43.37	-80.364	312
Arthropoda	Insecta	Lepidoptera	Tortricidae	Tortricinae	Argyrotaenia	Argyrotaenia mariana	Angela Telfer	RRMFC1992-15	BOLD:AAA4119	pending	14-May-2015	Site 3 - South Field, forest edge	43.37	-80.364	312
Arthropoda	Insecta	Lepidoptera	Tortricidae	Tortricinae	Argyrotaenia	Argyrotaenia mariana	Angela Telfer	RRMFD569-15	BOLD:AAA4119	pending	21-May-2015	Site 3 - South Field, forest edge	43.37	-80.364	312
Arthropoda	Insecta	Diptera	Simuliidae	Simuliinae	Simulium	Simulium vittatum	Angela Telfer	RRSSA1057-15	BOLD:AAA4121	pending	31-May-2015	Site 1 - Field Edge Forest	43.374	-80.354	332
Arthropoda	Insecta	Diptera	Simuliidae	Simuliinae	Simulium	Simulium vittatum	Angela Telfer	RRMFG156-15	BOLD:AAA4121	pending	11-Jun-2015	Site 3 - South Field, forest edge	43.37	-80.364	312
Arthropoda	Insecta	Diptera	Simuliidae	Simuliinae	Simulium	Simulium vittatum	Angela Telfer	RRMPB2056-15	BOLD:AAA4121	pending	07-May-2015	Site 4 - Blair Flats, unburned prairie	43.385	-80.369	264
Arthropoda	Insecta	Diptera	Simuliidae	Simuliinae	Simulium	Simulium vittatum	Angela Telfer	RRMPB1131-15	BOLD:AAA4121	pending	07-May-2015	Site 4 - Blair Flats, unburned prairie	43.385	-80.369	264
Arthropoda	Insecta	Diptera	Simuliidae	Simuliinae	Simulium	Simulium vittatum	Angela Telfer	RRMPB030-15	BOLD:AAA4121	pending	07-May-2015	Site 4 - Blair Flats, unburned prairie	43.385	-80.369	264
Arthropoda	Insecta	Diptera	Simuliidae	Simuliinae	Simulium	Simulium vittatum	Angela Telfer	RRMPB3998-15	BOLD:AAA4121	pending	07-May-2015	Site 4 - Blair Flats, unburned prairie	43.385	-80.369	264
Arthropoda	Insecta	Diptera	Simuliidae	Simuliinae	Simulium	Simulium vittatum	Angela Telfer	RRMFE853-15	BOLD:AAA4121	pending	27-May-2015	Site 3 - South Field, forest edge	43.37	-80.364	312
Arthropoda	Insecta	Diptera	Simuliidae	Simuliinae	Simulium	Simulium vittatum	Angela Telfer	RRMPG271-15	BOLD:AAA4121	pending	11-Jun-2015	Site 4 - Blair Flats, unburned prairie	43.385	-80.369	264
Arthropoda	Insecta	Diptera	Simuliidae	Simuliinae	Simulium	Simulium vittatum	Angela Telfer	RRMPB3261-15	BOLD:AAA4121	pending	07-May-2015	Site 4 - Blair Flats, unburned prairie	43.385	-80.369	264
Arthropoda	Insecta	Diptera	Simuliidae	Simuliinae	Simulium	Simulium vittatum	Angela Telfer	RRMPG905-15	BOLD:AAA4121	pending	11-Jun-2015	Site 4 - Blair Flats, unburned prairie	43.385	-80.369	264
Arthropoda	Insecta	Diptera	Simuliidae	Simuliinae	Simulium	Simulium vittatum	Angela Telfer	RRMPB2135-15	BOLD:AAA4121	pending	07-May-2015	Site 4 - Blair Flats, unburned prairie	43.385	-80.369	264
Arthropoda	Insecta	Diptera	Simuliidae	Simuliinae	Simulium	Simulium vittatum	Angela Telfer	RRMPA488-15	BOLD:AAA4121	pending	29-Apr-2015	Site 4 - Blair Flats, unburned prairie	43.3854	-80.369	264
Arthropoda	Insecta	Diptera	Simuliidae	Simuliinae	Simulium	Simulium vittatum	Angela Telfer	RRMPB3608-15	BOLD:AAA4121	pending	07-May-2015	Site 4 - Blair Flats, unburned prairie	43.385	-80.369	264
Arthropoda	Insecta	Diptera	Simuliidae	Simuliinae	Simulium	Simulium vittatum	Angela Telfer	RRMPE125-15	BOLD:AAA4121	pending	27-May-2015	Site 4 - Blair Flats, unburned prairie	43.385	-80.369	264
Arthropoda	Insecta	Diptera	Simuliidae	Simuliinae	Simulium	Simulium vittatum	Angela Telfer	RRMPB3593-15	BOLD:AAA4121	pending	07-May-2015	Site 4 - Blair Flats, unburned prairie	43.385	-80.369	264
Arthropoda	Insecta	Diptera	Simuliidae	Simuliinae	Simulium	Simulium vittatum	Angela Telfer	RRSSA2809-15	BOLD:AAA4121	pending	31-May-2015	Site 1 - Field Edge Forest	43.374	-80.354	332
Arthropoda	Insecta	Diptera	Simuliidae	Simuliinae	Simulium	Simulium vittatum	Angela Telfer	RRSSA929-15	BOLD:AAA4121	pending	31-May-2015	Site 1 - Field Edge Forest	43.374	-80.354	332
Arthropoda	Insecta	Diptera	Simuliidae	Simuliinae	Simulium	Simulium vittatum	Angela Telfer	RRMPG400-15	BOLD:AAA4121	pending	11-Jun-2015	Site 4 - Blair Flats, unburned prairie	43.385	-80.369	264
Arthropoda	Insecta	Diptera	Simuliidae	Simuliinae	Simulium	Simulium vittatum	Angela Telfer	RRMPA833-15	BOLD:AAA4121	pending	29-Apr-2015	Site 4 - Blair Flats, unburned prairie	43.3854	-80.369	264
Arthropoda	Insecta	Diptera	Simuliidae	Simuliinae	Simulium	Simulium vittatum	Angela Telfer	RRMPE047-15	BOLD:AAA4121	pending	27-May-2015	Site 4 - Blair Flats, unburned prairie	43.385	-80.369	264
Arthropoda	Insecta	Diptera	Simuliidae	Simuliinae	Simulium	Simulium vittatum	Angela Telfer	RRMPG916-15	BOLD:AAA4121	pending	11-Jun-2015	Site 4 - Blair Flats, unburned prairie	43.385	-80.369	264
Arthropoda	Insecta	Diptera	Simuliidae	Simuliinae	Simulium	Simulium vittatum	Angela Telfer	RRMPG870-15	BOLD:AAA4121	pending	11-Jun-2015	Site 4 - Blair Flats, unburned prairie	43.385	-80.369	264
Arthropoda	Insecta	Diptera	Simuliidae	Simuliinae	Simulium	Simulium vittatum	Angela Telfer	RRMPG262-15	BOLD:AAA4121	pending	11-Jun-2015	Site 4 - Blair Flats, unburned prairie	43.385	-80.369	264
Arthropoda	Insecta	Diptera	Simuliidae	Simuliinae	Simulium	Simulium vittatum	Angela Telfer	RRMFG1829-15	BOLD:AAA4121	pending	11-Jun-2015	Site 3 - South Field, forest edge	43.3705	-80.3641	312
Arthropoda	Insecta	Diptera	Simuliidae	Simuliinae	Simulium	Simulium vittatum	Angela Telfer	RRMPG325-15	BOLD:AAA4121	pending	11-Jun-2015	Site 4 - Blair Flats, unburned prairie	43.385	-80.369	264
Arthropoda	Insecta	Diptera	Simuliidae	Simuliinae	Simulium	Simulium vittatum	Angela Telfer	RRMPG323-15	BOLD:AAA4121	pending	11-Jun-2015	Site 4 - Blair Flats, unburned prairie	43.385	-80.369	264
Arthropoda	Insecta	Diptera	Simuliidae	Simuliinae	Simulium	Simulium vittatum	Angela Telfer	RRMPG263-15	BOLD:AAA4121	pending	11-Jun-2015	Site 4 - Blair Flats, unburned prairie	43.385	-80.369	264
Arthropoda	Insecta	Diptera	Simuliidae	Simuliinae	Simulium	Simulium vittatum	Angela Telfer	RRMPE103-15	BOLD:AAA4121	pending	27-May-2015	Site 4 - Blair Flats, unburned prairie	43.385	-80.369	264
Arthropoda	Insecta	Diptera	Simuliidae	Simuliinae	Simulium	Simulium vittatum	Angela Telfer	RRMPB494-15	BOLD:AAA4121	pending	07-May-2015	Site 4 - Blair Flats, unburned prairie	43.385	-80.369	264
Arthropoda	Insecta	Diptera	Simuliidae	Simuliinae	Simulium	Simulium vittatum	Angela Telfer	RRMPE182-15	BOLD:AAA4121	pending	27-May-2015	Site 4 - Blair Flats, unburned prairie	43.385	-80.369	264
Arthropoda	Insecta	Diptera	Simuliidae	Simuliinae	Simulium	Simulium vittatum	Angela Telfer	RRMPG219-15	BOLD:AAA4121	pending	11-Jun-2015	Site 4 - Blair Flats, unburned prairie	43.385	-80.369	264
Arthropoda	Insecta	Diptera	Simuliidae	Simuliinae	Simulium	Simulium vittatum	Angela Telfer	RRMPB2469-15	BOLD:AAA4121	pending	07-May-2015	Site 4 - Blair Flats, unburned prairie	43.385	-80.369	264
Arthropoda	Insecta	Diptera	Simuliidae	Simuliinae	Simulium	Simulium vittatum	Angela Telfer	RRMPG573-15	BOLD:AAA4121	pending	11-Jun-2015	Site 4 - Blair Flats, unburned prairie	43.385	-80.369	264
Arthropoda	Insecta	Diptera	Simuliidae	Simuliinae	Simulium	Simulium vittatum	Angela Telfer	RRMFG513-15	BOLD:AAA4121	pending	11-Jun-2015	Site 3 - South Field, forest edge	43.3705	-80.3641	312
Arthropoda	Insecta	Diptera	Simuliidae	Simuliinae	Simulium	Simulium vittatum	Angela Telfer	RRMPE056-15	BOLD:AAA4121	pending	27-May-2015	Site 4 - Blair Flats, unburned prairie	43.385	-80.369	264
Arthropoda	Insecta	Diptera	Simuliidae	Simuliinae	Simulium	Simulium vittatum	Angela Telfer	RRMFG2212-15	BOLD:AAA4121	pending	11-Jun-2015	Site 3 - South Field, forest edge	43.3705	-80.3641	312
Arthropoda	Insecta	Diptera	Simuliidae	Simuliinae	Simulium	Simulium vittatum	Angela Telfer	RRMPB870-15	BOLD:AAA4121	pending	07-May-2015	Site 4 - Blair Flats, unburned prairie	43.385	-80.369	264
Arthropoda	Insecta	Diptera	Simuliidae	Simuliinae	Simulium	Simulium vittatum	Angela Telfer	RRMPG261-15	BOLD:AAA4121	pending	11-Jun-2015	Site 4 - Blair Flats, unburned prairie	43.385	-80.369	264
Arthropoda	Insecta	Diptera	Simuliidae	Simuliinae	Simulium	Simulium vittatum	Angela Telfer	RRMPB4175-15	BOLD:AAA4121	pending	07-May-2015	Site 4 - Blair Flats, unburned prairie	43.385	-80.369	264
Arthropoda	Insecta	Diptera	Simuliidae	Simuliinae	Simulium	Simulium vittatum	Angela Telfer	RRMFG3255-15	BOLD:AAA4121	pending	11-Jun-2015	Site 3 - South Field, forest edge	43.37	-80.364	312
Arthropoda	Insecta	Diptera	Simuliidae	Simuliinae	Simulium	Simulium vittatum	Angela Telfer	RRMPG399-15	BOLD:AAA4121	pending	11-Jun-2015	Site 4 - Blair Flats, unburned prairie	43.385	-80.369	264
Arthropoda	Insecta	Diptera	Simuliidae	Simuliinae	Simulium	Simulium vittatum	Angela Telfer	RRMPG259-15	BOLD:AAA4121	pending	11-Jun-2015	Site 4 - Blair Flats, unburned prairie	43.385	-80.369	264
Arthropoda	Insecta	Diptera	Simuliidae	Simuliinae	Simulium	Simulium vittatum	Angela Telfer	RRMFG710-15	BOLD:AAA4121	pending	11-Jun-2015	Site 3 - South Field, forest edge	43.3705	-80.3641	312
Arthropoda	Insecta	Diptera	Simuliidae	Simuliinae	Simulium	Simulium vittatum	Angela Telfer	RRMPG397-15	BOLD:AAA4121	pending	11-Jun-2015	Site 4 - Blair Flats, unburned prairie	43.385	-80.369	264
Arthropoda	Insecta	Diptera	Simuliidae	Simuliinae	Simulium	Simulium vittatum	Angela Telfer	RRMPA363-15	BOLD:AAA4121	pending	29-Apr-2015	Site 4 - Blair Flats, unburned prairie	43.3854	-80.369	264
Arthropoda	Insecta	Diptera	Simuliidae	Simuliinae	Simulium	Simulium vittatum	Angela Telfer	RRSSA1175-15	BOLD:AAA4121	pending	31-May-2015	Site 1 - Field Edge Forest	43.374	-80.354	332
Arthropoda	Insecta	Diptera	Simuliidae	Simuliinae	Simulium	Simulium vittatum	Angela Telfer	RRMPE207-15	BOLD:AAA4121	pending	27-May-2015	Site 4 - Blair Flats, unburned prairie	43.385	-80.369	264
Arthropoda	Insecta	Diptera	Simuliidae	Simuliinae	Simulium	Simulium vittatum	Angela Telfer	RRMPB3604-15	BOLD:AAA4121	pending	07-May-2015	Site 4 - Blair Flats, unburned prairie	43.385	-80.369	264
Arthropoda	Insecta	Diptera	Simuliidae	Simuliinae	Simulium	Simulium vittatum	Angela Telfer	RRMPG386-15	BOLD:AAA4121	pending	11-Jun-2015	Site 4 - Blair Flats, unburned prairie	43.385	-80.369	264
Arthropoda	Insecta	Diptera	Simuliidae	Simuliinae	Simulium	Simulium vittatum	Angela Telfer	RRMPB2866-15	BOLD:AAA4121	pending	07-May-2015	Site 4 - Blair Flats, unburned prairie	43.385	-80.369	264
Arthropoda	Insecta	Diptera	Simuliidae	Simuliinae	Simulium	Simulium vittatum	Angela Telfer	RRMFA114-15	BOLD:AAA4121	pending	29-Apr-2015	Site 3 - South Field, forest edge	43.3705	-80.3641	312
Arthropoda	Insecta	Diptera	Simuliidae	Simuliinae	Simulium	Simulium vittatum	Angela Telfer	RRMPB2358-15	BOLD:AAA4121	pending	07-May-2015	Site 4 - Blair Flats, unburned prairie	43.385	-80.369	264
Arthropoda	Insecta	Diptera	Simuliidae	Simuliinae	Simulium	Simulium vittatum	Angela Telfer	RRMFB923-15	BOLD:AAA4121	pending	07-May-2015	Site 3 - South Field, forest edge	43.3705	-80.3641	312
Arthropoda	Insecta	Diptera	Simuliidae	Simuliinae	Simulium	Simulium vittatum	Angela Telfer	RRSSA1204-15	BOLD:AAA4121	pending	31-May-2015	Site 1 - Field Edge Forest	43.374	-80.354	332
Arthropoda	Insecta	Diptera	Simuliidae	Simuliinae	Simulium	Simulium vittatum	Angela Telfer	RRMPB2311-15	BOLD:AAA4121	pending	07-May-2015	Site 4 - Blair Flats, unburned prairie	43.385	-80.369	264
Arthropoda	Insecta	Diptera	Simuliidae	Simuliinae	Simulium	Simulium vittatum	Angela Telfer	RRMPB3700-15	BOLD:AAA4121	pending	07-May-2015	Site 4 - Blair Flats, unburned prairie	43.385	-80.369	264
Arthropoda	Insecta	Diptera	Simuliidae	Simuliinae	Simulium	Simulium vittatum	Angela Telfer	RRMPB031-15	BOLD:AAA4121	pending	07-May-2015	Site 4 - Blair Flats, unburned prairie	43.385	-80.369	264
Arthropoda	Insecta	Diptera	Simuliidae	Simuliinae	Simulium	Simulium vittatum	Angela Telfer	RRMPG360-15	BOLD:AAA4121	pending	11-Jun-2015	Site 4 - Blair Flats, unburned prairie	43.385	-80.369	264
Arthropoda	Insecta	Diptera	Simuliidae	Simuliinae	Simulium	Simulium vittatum	Angela Telfer	RRMPG268-15	BOLD:AAA4121	pending	11-Jun-2015	Site 4 - Blair Flats, unburned prairie	43.385	-80.369	264
Arthropoda	Insecta	Diptera	Simuliidae	Simuliinae	Simulium	Simulium vittatum	Angela Telfer	RRMPG260-15	BOLD:AAA4121	pending	11-Jun-2015	Site 4 - Blair Flats, unburned prairie	43.385	-80.369	264
Arthropoda	Insecta	Diptera	Simuliidae	Simuliinae	Simulium	Simulium vittatum	Angela Telfer	RRMPC708-15	BOLD:AAA4121	pending	14-May-2015	Site 4 - Blair Flats, unburned prairie	43.385	-80.369	264
Arthropoda	Insecta	Diptera	Simuliidae	Simuliinae	Simulium	Simulium vittatum	Angela Telfer	RRMPG704-15	BOLD:AAA4121	pending	11-Jun-2015	Site 4 - Blair Flats, unburned prairie	43.385	-80.369	264
Arthropoda	Insecta	Diptera	Simuliidae	Simuliinae	Simulium	Simulium vittatum	Angela Telfer	RRMPG326-15	BOLD:AAA4121	pending	11-Jun-2015	Site 4 - Blair Flats, unburned prairie	43.385	-80.369	264
Arthropoda	Insecta	Diptera	Simuliidae	Simuliinae	Simulium	Simulium vittatum	Angela Telfer	RRMPE253-15	BOLD:AAA4121	pending	27-May-2015	Site 4 - Blair Flats, unburned prairie	43.385	-80.369	264
Arthropoda	Insecta	Diptera	Simuliidae	Simuliinae	Simulium	Simulium vittatum	Angela Telfer	RRSSA1129-15	BOLD:AAA4121	pending	31-May-2015	Site 1 - Field Edge Forest	43.374	-80.354	332
Arthropoda	Insecta	Diptera	Simuliidae	Simuliinae	Simulium	Simulium vittatum	Angela Telfer	RRMPB4156-15	BOLD:AAA4121	pending	07-May-2015	Site 4 - Blair Flats, unburned prairie	43.385	-80.369	264
Arthropoda	Insecta	Diptera	Simuliidae	Simuliinae	Simulium	Simulium vittatum	Angela Telfer	RRMPB2419-15	BOLD:AAA4121	pending	07-May-2015	Site 4 - Blair Flats, unburned prairie	43.385	-80.369	264
Arthropoda	Insecta	Diptera	Simuliidae	Simuliinae	Simulium	Simulium vittatum	Angela Telfer	RRMPG324-15	BOLD:AAA4121	pending	11-Jun-2015	Site 4 - Blair Flats, unburned prairie	43.385	-80.369	264
Arthropoda	Insecta	Diptera	Simuliidae	Simuliinae	Simulium	Simulium vittatum	Angela Telfer	RRMPG242-15	BOLD:AAA4121	pending	11-Jun-2015	Site 4 - Blair Flats, unburned prairie	43.385	-80.369	264
Arthropoda	Insecta	Diptera	Simuliidae	Simuliinae	Simulium	Simulium vittatum	Angela Telfer	RRMPG269-15	BOLD:AAA4121	pending	11-Jun-2015	Site 4 - Blair Flats, unburned prairie	43.385	-80.369	264
Arthropoda	Insecta	Diptera	Simuliidae	Simuliinae	Simulium	Simulium vittatum	Angela Telfer	RRMPG322-15	BOLD:AAA4121	pending	11-Jun-2015	Site 4 - Blair Flats, unburned prairie	43.385	-80.369	264
Arthropoda	Insecta	Diptera	Simuliidae	Simuliinae	Simulium	Simulium vittatum	Angela Telfer	RRMPB2762-15	BOLD:AAA4121	pending	07-May-2015	Site 4 - Blair Flats, unburned prairie	43.385	-80.369	264
Arthropoda	Insecta	Diptera	Simuliidae	Simuliinae	Simulium	Simulium vittatum	Angela Telfer	RRMPB4053-15	BOLD:AAA4121	pending	07-May-2015	Site 4 - Blair Flats, unburned prairie	43.385	-80.369	264
Arthropoda	Insecta	Diptera	Simuliidae	Simuliinae	Simulium	Simulium vittatum	Angela Telfer	RRMPB2217-15	BOLD:AAA4121	pending	07-May-2015	Site 4 - Blair Flats, unburned prairie	43.385	-80.369	264
Arthropoda	Insecta	Diptera	Simuliidae	Simuliinae	Simulium	Simulium vittatum	Angela Telfer	RRSSA726-15	BOLD:AAA4121	pending	31-May-2015	Site 1 - Field Edge Forest	43.374	-80.354	332
Arthropoda	Insecta	Diptera	Simuliidae	Simuliinae	Simulium	Simulium vittatum	Angela Telfer	RRMPG702-15	BOLD:AAA4121	pending	11-Jun-2015	Site 4 - Blair Flats, unburned prairie	43.385	-80.369	264
Arthropoda	Insecta	Diptera	Simuliidae	Simuliinae	Simulium	Simulium vittatum	Angela Telfer	RRMPB432-15	BOLD:AAA4121	pending	07-May-2015	Site 4 - Blair Flats, unburned prairie	43.385	-80.369	264
Arthropoda	Insecta	Diptera	Simuliidae	Simuliinae	Simulium	Simulium vittatum	Angela Telfer	RRMPB2051-15	BOLD:AAA4121	pending	07-May-2015	Site 4 - Blair Flats, unburned prairie	43.385	-80.369	264
Arthropoda	Insecta	Diptera	Simuliidae	Simuliinae	Simulium	Simulium vittatum	Angela Telfer	RRMPG398-15	BOLD:AAA4121	pending	11-Jun-2015	Site 4 - Blair Flats, unburned prairie	43.385	-80.369	264
Arthropoda	Insecta	Diptera	Simuliidae	Simuliinae	Simulium	Simulium vittatum	Angela Telfer	RRMPG185-15	BOLD:AAA4121	pending	11-Jun-2015	Site 4 - Blair Flats, unburned prairie	43.385	-80.369	264
Arthropoda	Insecta	Diptera	Simuliidae	Simuliinae	Simulium	Simulium vittatum	Angela Telfer	RRMPG294-15	BOLD:AAA4121	pending	11-Jun-2015	Site 4 - Blair Flats, unburned prairie	43.385	-80.369	264
Arthropoda	Insecta	Diptera	Simuliidae	Simuliinae	Simulium	Simulium vittatum	Angela Telfer	RRMPB061-15	BOLD:AAA4121	pending	07-May-2015	Site 4 - Blair Flats, unburned prairie	43.385	-80.369	264
Arthropoda	Insecta	Diptera	Simuliidae	Simuliinae	Simulium	Simulium vittatum	Angela Telfer	RRMPB3407-15	BOLD:AAA4121	pending	07-May-2015	Site 4 - Blair Flats, unburned prairie	43.385	-80.369	264
Arthropoda	Insecta	Diptera	Simuliidae	Simuliinae	Simulium	Simulium vittatum	Angela Telfer	RRMPG392-15	BOLD:AAA4121	pending	11-Jun-2015	Site 4 - Blair Flats, unburned prairie	43.385	-80.369	264
Arthropoda	Insecta	Diptera	Simuliidae	Simuliinae	Simulium	Simulium vittatum	Angela Telfer	RRMPG703-15	BOLD:AAA4121	pending	11-Jun-2015	Site 4 - Blair Flats, unburned prairie	43.385	-80.369	264
Arthropoda	Insecta	Diptera	Simuliidae	Simuliinae	Simulium	Simulium vittatum	Angela Telfer	RRMPG396-15	BOLD:AAA4121	pending	11-Jun-2015	Site 4 - Blair Flats, unburned prairie	43.385	-80.369	264
Arthropoda	Insecta	Diptera	Simuliidae	Simuliinae	Simulium	Simulium vittatum	Angela Telfer	RRMPG270-15	BOLD:AAA4121	pending	11-Jun-2015	Site 4 - Blair Flats, unburned prairie	43.385	-80.369	264
Arthropoda	Insecta	Diptera	Simuliidae	Simuliinae	Simulium	Simulium vittatum	Angela Telfer	RRMPG889-15	BOLD:AAA4121	pending	11-Jun-2015	Site 4 - Blair Flats, unburned prairie	43.385	-80.369	264
Arthropoda	Insecta	Diptera	Simuliidae	Simuliinae	Simulium	Simulium vittatum	Angela Telfer	RRMPB3765-15	BOLD:AAA4121	pending	07-May-2015	Site 4 - Blair Flats, unburned prairie	43.385	-80.369	264
Arthropoda	Insecta	Diptera	Simuliidae	Simuliinae	Simulium	Simulium vittatum	Angela Telfer	RRMPB2057-15	BOLD:AAA4121	pending	07-May-2015	Site 4 - Blair Flats, unburned prairie	43.385	-80.369	264
Arthropoda	Insecta	Diptera	Simuliidae	Simuliinae	Simulium	Simulium vittatum	Angela Telfer	RRMPG391-15	BOLD:AAA4121	pending	11-Jun-2015	Site 4 - Blair Flats, unburned prairie	43.385	-80.369	264
Arthropoda	Insecta	Diptera	Simuliidae	Simuliinae	Simulium	Simulium vittatum	Angela Telfer	RRMPB2767-15	BOLD:AAA4121	pending	07-May-2015	Site 4 - Blair Flats, unburned prairie	43.385	-80.369	264
Arthropoda	Insecta	Diptera	Simuliidae	Simuliinae	Simulium	Simulium vittatum	Angela Telfer	RRMPG240-15	BOLD:AAA4121	pending	11-Jun-2015	Site 4 - Blair Flats, unburned prairie	43.385	-80.369	264
Arthropoda	Insecta	Diptera	Simuliidae	Simuliinae	Simulium	Simulium vittatum	Angela Telfer	RRMPE289-15	BOLD:AAA4121	pending	27-May-2015	Site 4 - Blair Flats, unburned prairie	43.385	-80.369	264
Arthropoda	Insecta	Diptera	Simuliidae	Simuliinae	Simulium	Simulium vittatum	Angela Telfer	RRMPG267-15	BOLD:AAA4121	pending	11-Jun-2015	Site 4 - Blair Flats, unburned prairie	43.385	-80.369	264
Arthropoda	Insecta	Diptera	Simuliidae	Simuliinae	Simulium	Simulium vittatum	Angela Telfer	RRSSA855-15	BOLD:AAA4121	pending	31-May-2015	Site 1 - Field Edge Forest	43.374	-80.354	332
Arthropoda	Insecta	Diptera	Simuliidae	Simuliinae	Simulium	Simulium vittatum	Angela Telfer	RRMPB2900-15	BOLD:AAA4121	pending	07-May-2015	Site 4 - Blair Flats, unburned prairie	43.385	-80.369	264
Arthropoda	Insecta	Diptera	Simuliidae	Simuliinae	Simulium	Simulium vittatum	Angela Telfer	RRMFG527-15	BOLD:AAA4121	pending	11-Jun-2015	Site 3 - South Field, forest edge	43.3705	-80.3641	312
Arthropoda	Insecta	Diptera	Simuliidae	Simuliinae	Simulium	Simulium vittatum	Angela Telfer	RRMPB4167-15	BOLD:AAA4121	pending	07-May-2015	Site 4 - Blair Flats, unburned prairie	43.385	-80.369	264
Arthropoda	Insecta	Diptera	Simuliidae	Simuliinae	Simulium	Simulium vittatum	Angela Telfer	RRMPG108-15	BOLD:AAA4121	pending	11-Jun-2015	Site 4 - Blair Flats, unburned prairie	43.385	-80.369	264
Arthropoda	Insecta	Diptera	Simuliidae	Simuliinae	Simulium	Simulium vittatum	Angela Telfer	RRMPB2468-15	BOLD:AAA4121	pending	07-May-2015	Site 4 - Blair Flats, unburned prairie	43.385	-80.369	264
Arthropoda	Insecta	Diptera	Simuliidae	Simuliinae	Simulium	Simulium vittatum	Angela Telfer	RRMPE078-15	BOLD:AAA4121	pending	27-May-2015	Site 4 - Blair Flats, unburned prairie	43.385	-80.369	264
Arthropoda	Insecta	Diptera	Simuliidae	Simuliinae	Simulium	Simulium vittatum	Angela Telfer	RRMPG701-15	BOLD:AAA4121	pending	11-Jun-2015	Site 4 - Blair Flats, unburned prairie	43.385	-80.369	264
Arthropoda	Arachnida	Araneae	Araneidae		Neoscona	Neoscona arabesca	Gergin A. Blagoev	RRSPI231-15	BOLD:AAA4123	pending	04-Jun-2015	Site 4 - Blair Flats, unburned prairie	43.385	-80.369	264
Arthropoda	Arachnida	Araneae	Araneidae		Neoscona	Neoscona arabesca	Gergin A. Blagoev	RRSPI131-15	BOLD:AAA4123	pending	29-May-2015	Site 2 - Grassy Field	43.376	-80.375	294
Arthropoda	Arachnida	Araneae	Araneidae		Neoscona	Neoscona arabesca	Gergin A. Blagoev	RRSSA4222-15	BOLD:AAA4123	pending	27-May-2015	Site 1 - Field Edge Forest	43.374	-80.354	332
Arthropoda	Arachnida	Araneae	Araneidae		Araneus	Araneus diadematus	Gergin A. Blagoev	RRSPI320-15	BOLD:AAA4125	pending	25-May-2015	Site 3 - Grassy Wetland	43.391	-80.375	270
Arthropoda	Insecta	Lepidoptera	Noctuidae	Noctuinae	Orthosia	Orthosia hibisci	Angela Telfer	RRMFE941-15	BOLD:AAA4128	pending	27-May-2015	Site 3 - South Field, forest edge	43.37	-80.364	312
Arthropoda	Insecta	Lepidoptera	Noctuidae	Noctuinae	Orthosia	Orthosia hibisci	Angela Telfer	RRSSA3878-15	BOLD:AAA4128	pending	31-May-2015	Site 1 - Field Edge Forest	43.374	-80.354	332
Arthropoda	Insecta	Lepidoptera	Noctuidae	Noctuinae	Orthosia	Orthosia hibisci	Angela Telfer	RRMPC1030-15	BOLD:AAA4128	pending	14-May-2015	Site 4 - Blair Flats, unburned prairie	43.385	-80.369	264
Arthropoda	Insecta	Lepidoptera	Noctuidae	Noctuinae	Orthosia	Orthosia hibisci	Angela Telfer	RRSSA3877-15	BOLD:AAA4128	pending	31-May-2015	Site 1 - Field Edge Forest	43.374	-80.354	332
Arthropoda	Insecta	Lepidoptera	Noctuidae	Noctuinae	Orthosia	Orthosia hibisci	Angela Telfer	RRMFD1617-15	BOLD:AAA4128	pending	21-May-2015	Site 3 - South Field, forest edge	43.37	-80.364	312
Arthropoda	Insecta	Lepidoptera	Noctuidae	Noctuinae	Orthosia	Orthosia hibisci	Angela Telfer	RRSSA2512-15	BOLD:AAA4128	pending	31-May-2015	Site 1 - Field Edge Forest	43.374	-80.354	332
Arthropoda	Insecta	Lepidoptera	Noctuidae	Noctuinae	Orthosia	Orthosia hibisci	Angela Telfer	RRSSA2504-15	BOLD:AAA4128	pending	31-May-2015	Site 1 - Field Edge Forest	43.374	-80.354	332
Arthropoda	Insecta	Lepidoptera	Noctuidae	Noctuinae	Orthosia	Orthosia hibisci	Angela Telfer	RRSSA1973-15	BOLD:AAA4128	pending	25-May-2015	Site 1 - Field Edge Forest	43.374	-80.354	332
Arthropoda	Insecta	Lepidoptera	Noctuidae	Noctuinae	Orthosia	Orthosia hibisci	Angela Telfer	RRSSA2505-15	BOLD:AAA4128	pending	31-May-2015	Site 1 - Field Edge Forest	43.374	-80.354	332
Arthropoda	Insecta	Lepidoptera	Noctuidae	Noctuinae	Orthosia	Orthosia hibisci	Angela Telfer	RRMFA243-15	BOLD:AAA4128	pending	29-Apr-2015	Site 3 - South Field, forest edge	43.3705	-80.3641	312
Arthropoda	Insecta	Lepidoptera	Noctuidae	Noctuinae	Orthosia	Orthosia hibisci	Angela Telfer	RRMFE940-15	BOLD:AAA4128	pending	27-May-2015	Site 3 - South Field, forest edge	43.37	-80.364	312
Arthropoda	Insecta	Lepidoptera	Lasiocampidae	Malacosomatinae	Malacosoma	Malacosoma disstria	Angela Telfer	RRMFE2905-15	BOLD:AAA4130	pending	27-May-2015	Site 3 - South Field, forest edge	43.3705	-80.3641	312
Arthropoda	Insecta	Lepidoptera	Lasiocampidae	Malacosomatinae	Malacosoma	Malacosoma disstria	Angela Telfer	RRMFE2904-15	BOLD:AAA4130	pending	27-May-2015	Site 3 - South Field, forest edge	43.3705	-80.3641	312
Arthropoda	Insecta	Lepidoptera	Lasiocampidae	Malacosomatinae	Malacosoma	Malacosoma disstria	Angela Telfer	RRMFD480-15	BOLD:AAA4130	pending	21-May-2015	Site 3 - South Field, forest edge	43.37	-80.364	312
Arthropoda	Insecta	Lepidoptera	Lasiocampidae	Malacosomatinae	Malacosoma	Malacosoma disstria	Angela Telfer	RRSSA1971-15	BOLD:AAA4130	pending	25-May-2015	Site 1 - Field Edge Forest	43.374	-80.354	332
Arthropoda	Insecta	Lepidoptera	Lasiocampidae	Malacosomatinae	Malacosoma	Malacosoma disstria	Angela Telfer	RRMFE2902-15	BOLD:AAA4130	pending	27-May-2015	Site 3 - South Field, forest edge	43.3705	-80.3641	312
Arthropoda	Insecta	Lepidoptera	Lasiocampidae	Malacosomatinae	Malacosoma	Malacosoma disstria	Angela Telfer	RRMFE2903-15	BOLD:AAA4130	pending	27-May-2015	Site 3 - South Field, forest edge	43.3705	-80.3641	312
Arthropoda	Arachnida	Araneae	Linyphiidae		Centromerus	Centromerus sylvaticus	Gergin A. Blagoev	RRSPI122-15	BOLD:AAA4132	pending	04-Jun-2015	Site 3 - South Field, forest edge	43.37	-80.364	312
Arthropoda	Collembola	Entomobryomorpha	Isotomidae		Parisotoma		Angela Telfer	RRBAA086-15	BOLD:AAA4157	pending	01-May-2015	Site 1 - Woodland Trail, alvar	43.379	-80.346	288
Arthropoda	Collembola	Entomobryomorpha	Isotomidae		Parisotoma		Angela Telfer	RRBAA208-15	BOLD:AAA4157	pending	01-May-2015	Site 1 - Woodland Trail, alvar	43.379	-80.346	288
Arthropoda	Collembola	Entomobryomorpha	Isotomidae		Parisotoma		Angela Telfer	RRBAA079-15	BOLD:AAA4157	pending	01-May-2015	Site 1 - Woodland Trail, alvar	43.379	-80.346	288
Arthropoda	Collembola	Entomobryomorpha	Isotomidae		Parisotoma		Angela Telfer	RRBAA076-15	BOLD:AAA4157	pending	01-May-2015	Site 1 - Woodland Trail, alvar	43.379	-80.346	288
Arthropoda	Collembola	Entomobryomorpha	Isotomidae		Parisotoma		Angela Telfer	RRBAA021-15	BOLD:AAA4157	pending	01-May-2015	Site 1 - Woodland Trail, alvar	43.379	-80.346	288
Arthropoda	Collembola	Entomobryomorpha	Isotomidae		Parisotoma		Angela Telfer	RRBFA472-15	BOLD:AAA4157	pending	01-May-2015	Site 3 - South Field, forest edge	43.37	-80.364	312
Arthropoda	Collembola	Entomobryomorpha	Isotomidae		Parisotoma		Angela Telfer	RRBAA088-15	BOLD:AAA4157	pending	01-May-2015	Site 1 - Woodland Trail, alvar	43.379	-80.346	288
Arthropoda	Collembola	Entomobryomorpha	Isotomidae		Parisotoma		Angela Telfer	RRBAA016-15	BOLD:AAA4157	pending	01-May-2015	Site 1 - Woodland Trail, alvar	43.379	-80.346	288
Arthropoda	Collembola	Entomobryomorpha	Isotomidae		Parisotoma		Angela Telfer	RRBAA006-15	BOLD:AAA4157	pending	01-May-2015	Site 1 - Woodland Trail, alvar	43.379	-80.346	288
Arthropoda	Collembola	Entomobryomorpha	Isotomidae		Parisotoma		Angela Telfer	RRBFA417-15	BOLD:AAA4157	pending	01-May-2015	Site 3 - South Field, forest edge	43.37	-80.364	312
Arthropoda	Collembola	Entomobryomorpha	Isotomidae		Parisotoma		Angela Telfer	RRBAA477-15	BOLD:AAA4157	pending	01-May-2015	Site 1 - Woodland Trail, alvar	43.379	-80.346	288
Arthropoda	Collembola	Entomobryomorpha	Isotomidae		Parisotoma		Angela Telfer	RRBFA413-15	BOLD:AAA4157	pending	01-May-2015	Site 3 - South Field, forest edge	43.37	-80.364	312
Arthropoda	Collembola	Entomobryomorpha	Isotomidae		Parisotoma		Angela Telfer	RRBGA156-15	BOLD:AAA4157	pending	01-May-2015	Site 2 - South Field, field	43.37	-80.364	312
Arthropoda	Collembola	Entomobryomorpha	Isotomidae		Parisotoma		Angela Telfer	RRBAA012-15	BOLD:AAA4157	pending	01-May-2015	Site 1 - Woodland Trail, alvar	43.379	-80.346	288
Arthropoda	Collembola	Entomobryomorpha	Isotomidae		Parisotoma		Angela Telfer	RRBAA485-15	BOLD:AAA4157	pending	01-May-2015	Site 1 - Woodland Trail, alvar	43.379	-80.346	288
Arthropoda	Collembola	Entomobryomorpha	Isotomidae		Parisotoma		Angela Telfer	RRBGA080-15	BOLD:AAA4157	pending	01-May-2015	Site 2 - South Field, field	43.37	-80.364	312
Arthropoda	Collembola	Entomobryomorpha	Isotomidae		Parisotoma		Angela Telfer	RRBAA015-15	BOLD:AAA4157	pending	01-May-2015	Site 1 - Woodland Trail, alvar	43.379	-80.346	288
Arthropoda	Collembola	Entomobryomorpha	Isotomidae		Parisotoma		Angela Telfer	RRBGA075-15	BOLD:AAA4157	pending	01-May-2015	Site 2 - South Field, field	43.37	-80.364	312
Arthropoda	Collembola	Entomobryomorpha	Isotomidae		Parisotoma		Angela Telfer	RRBAA035-15	BOLD:AAA4157	pending	01-May-2015	Site 1 - Woodland Trail, alvar	43.379	-80.346	288
Arthropoda	Collembola	Entomobryomorpha	Isotomidae		Parisotoma		Angela Telfer	RRBAA072-15	BOLD:AAA4157	pending	01-May-2015	Site 1 - Woodland Trail, alvar	43.379	-80.346	288
Arthropoda	Collembola	Entomobryomorpha	Isotomidae		Parisotoma		Angela Telfer	RRBAA422-15	BOLD:AAA4157	pending	01-May-2015	Site 1 - Woodland Trail, alvar	43.379	-80.346	288
Arthropoda	Collembola	Entomobryomorpha	Isotomidae		Parisotoma		Angela Telfer	RRBAA449-15	BOLD:AAA4157	pending	01-May-2015	Site 1 - Woodland Trail, alvar	43.379	-80.346	288
Arthropoda	Collembola	Entomobryomorpha	Isotomidae		Parisotoma		Angela Telfer	RRBAA484-15	BOLD:AAA4157	pending	01-May-2015	Site 1 - Woodland Trail, alvar	43.379	-80.346	288
Arthropoda	Collembola	Entomobryomorpha	Isotomidae		Parisotoma		Angela Telfer	RRBGA076-15	BOLD:AAA4157	pending	01-May-2015	Site 2 - South Field, field	43.37	-80.364	312
Arthropoda	Collembola	Entomobryomorpha	Isotomidae		Parisotoma		Angela Telfer	RRBFA468-15	BOLD:AAA4157	pending	01-May-2015	Site 3 - South Field, forest edge	43.37	-80.364	312
Arthropoda	Collembola	Entomobryomorpha	Isotomidae		Parisotoma		Angela Telfer	RRBFA459-15	BOLD:AAA4157	pending	01-May-2015	Site 3 - South Field, forest edge	43.37	-80.364	312
Arthropoda	Collembola	Entomobryomorpha	Isotomidae		Parisotoma		Angela Telfer	RRBAA031-15	BOLD:AAA4157	pending	01-May-2015	Site 1 - Woodland Trail, alvar	43.379	-80.346	288
Arthropoda	Collembola	Entomobryomorpha	Isotomidae		Parisotoma		Angela Telfer	RRBGA079-15	BOLD:AAA4157	pending	01-May-2015	Site 2 - South Field, field	43.37	-80.364	312
Arthropoda	Collembola	Entomobryomorpha	Isotomidae		Parisotoma		Angela Telfer	RRBFA450-15	BOLD:AAA4157	pending	01-May-2015	Site 3 - South Field, forest edge	43.37	-80.364	312
Arthropoda	Collembola	Entomobryomorpha	Isotomidae		Parisotoma		Angela Telfer	RRBAA094-15	BOLD:AAA4157	pending	01-May-2015	Site 1 - Woodland Trail, alvar	43.379	-80.346	288
Arthropoda	Collembola	Entomobryomorpha	Isotomidae		Parisotoma		Angela Telfer	RRBAA209-15	BOLD:AAA4157	pending	01-May-2015	Site 1 - Woodland Trail, alvar	43.379	-80.346	288
Arthropoda	Collembola	Entomobryomorpha	Isotomidae		Parisotoma		Angela Telfer	RRBGA071-15	BOLD:AAA4157	pending	01-May-2015	Site 2 - South Field, field	43.37	-80.364	312
Arthropoda	Collembola	Entomobryomorpha	Isotomidae		Parisotoma		Angela Telfer	RRBAA054-15	BOLD:AAA4157	pending	01-May-2015	Site 1 - Woodland Trail, alvar	43.379	-80.346	288
Arthropoda	Collembola	Entomobryomorpha	Isotomidae		Parisotoma		Angela Telfer	RRBAA083-15	BOLD:AAA4157	pending	01-May-2015	Site 1 - Woodland Trail, alvar	43.379	-80.346	288
Arthropoda	Collembola	Entomobryomorpha	Isotomidae		Parisotoma		Angela Telfer	RRBAA206-15	BOLD:AAA4157	pending	01-May-2015	Site 1 - Woodland Trail, alvar	43.379	-80.346	288
Arthropoda	Collembola	Entomobryomorpha	Isotomidae		Parisotoma		Angela Telfer	RRBAA476-15	BOLD:AAA4157	pending	01-May-2015	Site 1 - Woodland Trail, alvar	43.379	-80.346	288
Arthropoda	Insecta	Hymenoptera	Braconidae	Aphidiinae	Aphidius	Aphidius ervi	Angela Telfer	RRMPG997-15	BOLD:AAA4188	pending	11-Jun-2015	Site 4 - Blair Flats, unburned prairie	43.385	-80.369	264
Arthropoda	Insecta	Diptera	Syrphidae	Syrphinae	Toxomerus	Toxomerus marginatus	Angela Telfer	RRMFE2962-15	BOLD:AAA4277	pending	27-May-2015	Site 3 - South Field, forest edge	43.3705	-80.3641	312
Arthropoda	Insecta	Diptera	Syrphidae	Syrphinae	Toxomerus	Toxomerus marginatus	Angela Telfer	RRMPC875-15	BOLD:AAA4277	pending	14-May-2015	Site 4 - Blair Flats, unburned prairie	43.385	-80.369	264
Arthropoda	Insecta	Diptera	Syrphidae	Syrphinae	Toxomerus	Toxomerus marginatus	Angela Telfer	RRMFE2745-15	BOLD:AAA4277	pending	27-May-2015	Site 3 - South Field, forest edge	43.3705	-80.3641	312
Arthropoda	Insecta	Diptera	Syrphidae	Syrphinae	Toxomerus	Toxomerus marginatus	Angela Telfer	RRMPE349-15	BOLD:AAA4277	pending	27-May-2015	Site 4 - Blair Flats, unburned prairie	43.385	-80.369	264
Arthropoda	Insecta	Lepidoptera	Erebidae	Rivulinae	Rivula	Rivula propinqualis	Angela Telfer	RRBFA428-15	BOLD:AAA4282	pending	01-May-2015	Site 3 - South Field, forest edge	43.37	-80.364	312
Arthropoda	Insecta	Lepidoptera	Noctuidae	Noctuinae	Sunira	Sunira bicolorago	Angela Telfer	RRSSA3702-15	BOLD:AAA4426	pending	31-May-2015	Site 1 - Field Edge Forest	43.374	-80.354	332
Arthropoda	Insecta	Lepidoptera	Noctuidae	Noctuinae	Sunira	Sunira bicolorago	Angela Telfer	RRSSA2511-15	BOLD:AAA4426	pending	31-May-2015	Site 1 - Field Edge Forest	43.374	-80.354	332
Arthropoda	Insecta	Lepidoptera	Geometridae	Ennominae	Speranza	Speranza pustularia	Jeremy deWaard	RRSSA1968-15	BOLD:AAA4456	pending	25-May-2015	Site 1 - Field Edge Forest	43.374	-80.354	332
Arthropoda	Insecta	Diptera	Syrphidae	Syrphinae	Syrphus	Syrphus ribesii	Angela Telfer	RRMFC2005-15	BOLD:AAA4570	pending	14-May-2015	Site 3 - South Field, forest edge	43.37	-80.364	312
Arthropoda	Insecta	Hymenoptera	Braconidae	Microgastrinae	Glyptapanteles		Angela Telfer	RRMFE2087-15	BOLD:AAA4781	pending	27-May-2015	Site 3 - South Field, forest edge	43.3705	-80.3641	312
Arthropoda	Insecta	Hymenoptera	Braconidae	Microgastrinae	Protapanteles		Jose Leonardo Fernandez Triana	RRMFE2111-15	BOLD:AAA4782	pending	27-May-2015	Site 3 - South Field, forest edge	43.3705	-80.3641	312
Arthropoda	Collembola	Poduromorpha	Hypogastruridae				Angela Telfer	RRSSA1358-15	BOLD:AAA4811	pending	31-May-2015	Site 1 - Field Edge Forest	43.374	-80.354	332
Arthropoda	Collembola	Poduromorpha	Hypogastruridae				Angela Telfer	RRSSA2874-15	BOLD:AAA4811	pending	31-May-2015	Site 1 - Field Edge Forest	43.374	-80.354	332
Arthropoda	Collembola	Poduromorpha	Hypogastruridae				Angela Telfer	RRSSA3518-15	BOLD:AAA4811	pending	31-May-2015	Site 1 - Field Edge Forest	43.374	-80.354	332
Arthropoda	Collembola	Poduromorpha	Hypogastruridae				Angela Telfer	RRSSA358-15	BOLD:AAA4811	pending	31-May-2015	Site 1 - Field Edge Forest	43.374	-80.354	332
Arthropoda	Arachnida	Araneae	Lycosidae		Pardosa	Pardosa modica	Gergin A. Blagoev	RRSPI215-15	BOLD:AAA5090	pending	27-May-2015	Site 2 - South Field, field	43.37	-80.364	312
Arthropoda	Arachnida	Araneae	Lycosidae		Pardosa	Pardosa modica	Gergin A. Blagoev	RRSPI007-15	BOLD:AAA5090	pending	29-Apr-2015	Site 2 - South Field, field	43.37	-80.364	312
Arthropoda	Arachnida	Araneae	Lycosidae		Pardosa	Pardosa modica	Gergin A. Blagoev	RRSPI006-15	BOLD:AAA5090	pending	29-Apr-2015	Site 2 - South Field, field	43.37	-80.364	312
Arthropoda	Arachnida	Araneae	Lycosidae		Pardosa	Pardosa modica	Gergin A. Blagoev	RRSPI174-15	BOLD:AAA5090	pending	07-May-2015	Site 2 - South Field, field	43.37	-80.364	312
Arthropoda	Insecta	Lepidoptera	Geometridae	Ennominae	Phigalia	Phigalia titea	Mari Kekkonen	RRSSA2230-15	BOLD:AAA5234	pending	31-May-2015	Site 1 - Field Edge Forest	43.374	-80.354	332
Arthropoda	Insecta	Lepidoptera	Geometridae	Ennominae	Phigalia	Phigalia titea	Jayme E. Sones	RRSSA2510-15	BOLD:AAA5234	pending	31-May-2015	Site 1 - Field Edge Forest	43.374	-80.354	332
Arthropoda	Insecta	Diptera	Chironomidae	Orthocladiinae	Cricotopus		Angela Telfer	RRMPG614-15	BOLD:AAA5299	pending	11-Jun-2015	Site 4 - Blair Flats, unburned prairie	43.385	-80.369	264
Arthropoda	Insecta	Diptera	Chironomidae	Orthocladiinae	Cricotopus		Angela Telfer	RRMPG877-15	BOLD:AAA5299	pending	11-Jun-2015	Site 4 - Blair Flats, unburned prairie	43.385	-80.369	264
Arthropoda	Insecta	Diptera	Chironomidae	Orthocladiinae	Cricotopus		Angela Telfer	RRMFI1176-15	BOLD:AAA5299	pending	24-Jun-2015	Site 3 - South Field, forest edge	43.37	-80.364	312
Arthropoda	Insecta	Diptera	Chironomidae	Orthocladiinae	Cricotopus		Angela Telfer	RRSSA1067-15	BOLD:AAA5299	pending	31-May-2015	Site 1 - Field Edge Forest	43.374	-80.354	332
Arthropoda	Insecta	Diptera	Chironomidae	Orthocladiinae	Cricotopus		Angela Telfer	RRMFA155-15	BOLD:AAA5299	pending	29-Apr-2015	Site 3 - South Field, forest edge	43.3705	-80.3641	312
Arthropoda	Insecta	Hymenoptera	Ichneumonidae	Mesochorinae	Stictopisthus		Angela Telfer	RRMFE2842-15	BOLD:AAA5522	pending	27-May-2015	Site 3 - South Field, forest edge	43.3705	-80.3641	312
Arthropoda	Arachnida	Araneae	Salticidae		Eris	Eris militaris	Gergin A. Blagoev	RRSPI096-15	BOLD:AAA5654	pending	31-May-2015	Site 2 - Grassy Field	43.376	-80.375	294
Arthropoda	Arachnida	Araneae	Salticidae		Eris	Eris militaris	Gergin A. Blagoev	RRSPI073-15	BOLD:AAA5654	pending	25-May-2015	Site 1 - Field Edge Forest	43.374	-80.354	332
Arthropoda	Insecta	Trichoptera	Hydropsychidae	Hydropsychinae	Cheumatopsyche		Angela Telfer	RRMPD077-15	BOLD:AAA5695	pending	21-May-2015	Site 4 - Blair Flats, unburned prairie	43.385	-80.369	264
Arthropoda	Insecta	Trichoptera	Hydropsychidae	Hydropsychinae	Cheumatopsyche		Angela Telfer	RRMPD076-15	BOLD:AAA5695	pending	21-May-2015	Site 4 - Blair Flats, unburned prairie	43.385	-80.369	264
Arthropoda	Insecta	Trichoptera	Hydropsychidae	Hydropsychinae	Cheumatopsyche		Angela Telfer	RRMPC946-15	BOLD:AAA5695	pending	14-May-2015	Site 4 - Blair Flats, unburned prairie	43.385	-80.369	264
Arthropoda	Arachnida	Araneae	Thomisidae		Misumena	Misumena vatia	Gergin A. Blagoev	RRSPI241-15	BOLD:AAA6275	pending	04-Jun-2015	Around the Site 2 and Site 3	43.37	-80.364	312
Arthropoda	Arachnida	Araneae	Tetragnathidae		Tetragnatha	Tetragnatha laboriosa	Gergin A. Blagoev	RRMPC913-15	BOLD:AAA6381	pending	14-May-2015	Site 4 - Blair Flats, unburned prairie	43.385	-80.369	264
Arthropoda	Arachnida	Araneae	Tetragnathidae		Tetragnatha	Tetragnatha laboriosa	Gergin A. Blagoev	RRMPD048-15	BOLD:AAA6381	pending	21-May-2015	Site 4 - Blair Flats, unburned prairie	43.385	-80.369	264
Arthropoda	Arachnida	Araneae	Tetragnathidae		Tetragnatha	Tetragnatha laboriosa	Gergin A. Blagoev	RRMPD050-15	BOLD:AAA6381	pending	21-May-2015	Site 4 - Blair Flats, unburned prairie	43.385	-80.369	264
Arthropoda	Arachnida	Araneae	Tetragnathidae		Tetragnatha	Tetragnatha laboriosa	Gergin A. Blagoev	RRMPD051-15	BOLD:AAA6381	pending	21-May-2015	Site 4 - Blair Flats, unburned prairie	43.385	-80.369	264
Arthropoda	Arachnida	Araneae	Tetragnathidae		Tetragnatha	Tetragnatha laboriosa	Gergin A. Blagoev	RRSPI054-15	BOLD:AAA6381	pending	04-Jun-2015	Site 1 - Woodland Trail, alvar	43.379	-80.346	288
Arthropoda	Arachnida	Araneae	Tetragnathidae		Tetragnatha	Tetragnatha laboriosa	Gergin A. Blagoev	RRMPD047-15	BOLD:AAA6381	pending	21-May-2015	Site 4 - Blair Flats, unburned prairie	43.385	-80.369	264
Arthropoda	Arachnida	Araneae	Tetragnathidae		Tetragnatha	Tetragnatha laboriosa	Gergin A. Blagoev	RRSPI053-15	BOLD:AAA6381	pending	04-Jun-2015	Site 1 - Woodland Trail, alvar	43.379	-80.346	288
Arthropoda	Arachnida	Araneae	Tetragnathidae		Tetragnatha	Tetragnatha laboriosa	Gergin A. Blagoev	RRMPC914-15	BOLD:AAA6381	pending	14-May-2015	Site 4 - Blair Flats, unburned prairie	43.385	-80.369	264
Arthropoda	Insecta	Lepidoptera	Noctuidae	Noctuinae	Morrisonia	Morrisonia confusa	Angela Telfer	RRSSA4207-15	BOLD:AAA6652	pending	27-May-2015	Site 1 - Field Edge Forest	43.374	-80.354	332
Arthropoda	Insecta	Lepidoptera	Noctuidae	Noctuinae	Morrisonia	Morrisonia confusa	Angela Telfer	RRMFE2988-15	BOLD:AAA6652	pending	27-May-2015	Site 3 - South Field, forest edge	43.3705	-80.3641	312
Arthropoda	Insecta	Lepidoptera	Tortricidae	Olethreutinae	Proteoteras	Proteoteras aesculana	Angela Telfer	RRMPC915-15	BOLD:AAA6740	pending	14-May-2015	Site 4 - Blair Flats, unburned prairie	43.385	-80.369	264
Arthropoda	Arachnida	Araneae	Theridiidae		Enoplognatha	Enoplognatha ovata	Gergin A. Blagoev	RRMFG3280-15	BOLD:AAA6910	pending	11-Jun-2015	Site 3 - South Field, forest edge	43.37	-80.364	312
Arthropoda	Arachnida	Araneae	Theridiidae		Enoplognatha	Enoplognatha ovata	Gergin A. Blagoev	RRMFG2973-15	BOLD:AAA6910	pending	11-Jun-2015	Site 3 - South Field, forest edge	43.37	-80.364	312
Arthropoda	Arachnida	Araneae	Theridiidae		Enoplognatha	Enoplognatha ovata	Gergin A. Blagoev	RRMFG3163-15	BOLD:AAA6910	pending	11-Jun-2015	Site 3 - South Field, forest edge	43.37	-80.364	312
Arthropoda	Insecta	Lepidoptera	Noctuidae	Noctuinae	Crocigrapha	Crocigrapha normani	Mari Kekkonen	RRSSA2232-15	BOLD:AAA6924	pending	31-May-2015	Site 1 - Field Edge Forest	43.374	-80.354	332
Arthropoda	Insecta	Lepidoptera	Noctuidae	Noctuinae	Crocigrapha	Crocigrapha normani	Jeremy deWaard	RRMFD576-15	BOLD:AAA6924	pending	21-May-2015	Site 3 - South Field, forest edge	43.37	-80.364	312
Arthropoda	Insecta	Lepidoptera	Geometridae	Larentiinae	Trichodezia	Trichodezia albovittata	Angela Telfer	RRMFE2996-15	BOLD:AAA6926	pending	27-May-2015	Site 3 - South Field, forest edge	43.3705	-80.3641	312
Arthropoda	Insecta	Lepidoptera	Geometridae	Larentiinae	Trichodezia	Trichodezia albovittata	Angela Telfer	RRMFE3002-15	BOLD:AAA6926	pending	27-May-2015	Site 3 - South Field, forest edge	43.3705	-80.3641	312
Arthropoda	Insecta	Lepidoptera	Geometridae	Larentiinae	Trichodezia	Trichodezia albovittata	Angela Telfer	RRMFE3003-15	BOLD:AAA6926	pending	27-May-2015	Site 3 - South Field, forest edge	43.3705	-80.3641	312
Arthropoda	Insecta	Lepidoptera	Geometridae	Larentiinae	Trichodezia	Trichodezia albovittata	Angela Telfer	RRMFE2993-15	BOLD:AAA6926	pending	27-May-2015	Site 3 - South Field, forest edge	43.3705	-80.3641	312
Arthropoda	Insecta	Lepidoptera	Geometridae	Larentiinae	Trichodezia	Trichodezia albovittata	Angela Telfer	RRMFE3001-15	BOLD:AAA6926	pending	27-May-2015	Site 3 - South Field, forest edge	43.3705	-80.3641	312
Arthropoda	Insecta	Lepidoptera	Geometridae	Larentiinae	Trichodezia	Trichodezia albovittata	Angela Telfer	RRMFD574-15	BOLD:AAA6926	pending	21-May-2015	Site 3 - South Field, forest edge	43.37	-80.364	312
Arthropoda	Insecta	Lepidoptera	Geometridae	Larentiinae	Trichodezia	Trichodezia albovittata	Angela Telfer	RRMFD571-15	BOLD:AAA6926	pending	21-May-2015	Site 3 - South Field, forest edge	43.37	-80.364	312
Arthropoda	Insecta	Lepidoptera	Geometridae	Larentiinae	Trichodezia	Trichodezia albovittata	Angela Telfer	RRMFE2992-15	BOLD:AAA6926	pending	27-May-2015	Site 3 - South Field, forest edge	43.3705	-80.3641	312
Arthropoda	Insecta	Diptera	Culicidae	Culicinae	Aedes	Aedes vexans	Angela Telfer	RRSSA3576-15	BOLD:AAA7067	pending	27-May-2015	Site 1 - Field Edge Forest	43.374	-80.354	332
Arthropoda	Insecta	Diptera	Culicidae	Culicinae	Aedes	Aedes vexans	Angela Telfer	RRSSA3456-15	BOLD:AAA7067	pending	27-May-2015	Site 1 - Field Edge Forest	43.374	-80.354	332
Arthropoda	Insecta	Diptera	Culicidae	Culicinae	Aedes	Aedes vexans	Angela Telfer	RRSSA425-15	BOLD:AAA7067	pending	29-May-2015	Site 1 - Field Edge Forest	43.374	-80.354	332
Arthropoda	Insecta	Diptera	Culicidae	Culicinae	Aedes	Aedes vexans	Angela Telfer	RRSSA3578-15	BOLD:AAA7067	pending	27-May-2015	Site 1 - Field Edge Forest	43.374	-80.354	332
Arthropoda	Insecta	Diptera	Culicidae	Culicinae	Aedes	Aedes vexans	Angela Telfer	RRSSA3580-15	BOLD:AAA7067	pending	27-May-2015	Site 1 - Field Edge Forest	43.374	-80.354	332
Arthropoda	Collembola	Entomobryomorpha	Isotomidae		Desoria		Angela Telfer	RRSSA2856-15	BOLD:AAA7162	pending	31-May-2015	Site 1 - Field Edge Forest	43.374	-80.354	332
Arthropoda	Arachnida	Araneae	Philodromidae		Tibellus	Tibellus maritimus	Gergin A. Blagoev	RRMFC1789-15	BOLD:AAA7188	pending	14-May-2015	Site 3 - South Field, forest edge	43.37	-80.364	312
Arthropoda	Arachnida	Araneae	Philodromidae		Tibellus	Tibellus maritimus	Gergin A. Blagoev	RRSPI071-15	BOLD:AAA7188	pending	29-May-2015	Site 2 - Grassy Field	43.376	-80.375	294
Arthropoda	Arachnida	Araneae	Philodromidae		Tibellus	Tibellus maritimus	Gergin A. Blagoev	RRSPI072-15	BOLD:AAA7188	pending	29-May-2015	Site 2 - Grassy Field	43.376	-80.375	294
Arthropoda	Arachnida	Araneae	Philodromidae		Tibellus	Tibellus maritimus	Gergin A. Blagoev	RRSPI051-15	BOLD:AAA7188	pending	04-Jun-2015	Site 1 - Woodland Trail, alvar	43.379	-80.346	288
Arthropoda	Arachnida	Araneae	Philodromidae		Tibellus	Tibellus maritimus	Gergin A. Blagoev	RRSPI206-15	BOLD:AAA7188	pending	07-May-2015	Around the Site 2 and Site 3	43.37	-80.364	312
Arthropoda	Arachnida	Araneae	Philodromidae		Tibellus	Tibellus maritimus	Gergin A. Blagoev	RRSPI052-15	BOLD:AAA7188	pending	04-Jun-2015	Site 1 - Woodland Trail, alvar	43.379	-80.346	288
Arthropoda	Arachnida	Araneae	Philodromidae		Tibellus	Tibellus maritimus	Gergin A. Blagoev	RRSPI220-15	BOLD:AAA7188	pending	25-May-2015	Site 3 - Grassy Wetland	43.391	-80.375	270
Arthropoda	Arachnida	Araneae	Philodromidae		Tibellus	Tibellus maritimus	Gergin A. Blagoev	RRSPI112-15	BOLD:AAA7188	pending	04-Jun-2015	Around the Site 2 and Site 3	43.37	-80.364	312
Arthropoda	Arachnida	Araneae	Philodromidae		Tibellus	Tibellus oblongus	Gergin A. Blagoev	RRSPI084-15	BOLD:AAA7188	pending	25-May-2015	Site 2 - Grassy Field	43.376	-80.375	294
Arthropoda	Arachnida	Araneae	Philodromidae		Tibellus	Tibellus oblongus	Gergin A. Blagoev	RRSPI083-15	BOLD:AAA7188	pending	25-May-2015	Site 2 - Grassy Field	43.376	-80.375	294
Arthropoda	Insecta	Hymenoptera	Encyrtidae	Encyrtinae	Copidosoma	Copidosoma floridanum	Angela Telfer	RRMFG1559-15	BOLD:AAA7203	pending	11-Jun-2015	Site 3 - South Field, forest edge	43.3705	-80.3641	312
Arthropoda	Insecta	Hymenoptera	Encyrtidae	Encyrtinae	Copidosoma	Copidosoma floridanum	Angela Telfer	RRMFG1608-15	BOLD:AAA7203	pending	11-Jun-2015	Site 3 - South Field, forest edge	43.3705	-80.3641	312
Arthropoda	Arachnida	Araneae	Lycosidae		Schizocosa	Schizocosa ocreata	Gergin A. Blagoev	RRSSA2476-15	BOLD:AAA7232	pending	31-May-2015	Site 1 - Field Edge Forest	43.374	-80.354	332
Arthropoda	Arachnida	Araneae	Lycosidae		Schizocosa	Schizocosa ocreata	Gergin A. Blagoev	RRSSA2484-15	BOLD:AAA7232	pending	31-May-2015	Site 1 - Field Edge Forest	43.374	-80.354	332
Arthropoda	Arachnida	Araneae	Lycosidae		Schizocosa	Schizocosa ocreata	Gergin A. Blagoev	RRSSA2494-15	BOLD:AAA7232	pending	31-May-2015	Site 1 - Field Edge Forest	43.374	-80.354	332
Arthropoda	Arachnida	Araneae	Lycosidae		Schizocosa	Schizocosa ocreata	Gergin A. Blagoev	RRSSA2495-15	BOLD:AAA7232	pending	31-May-2015	Site 1 - Field Edge Forest	43.374	-80.354	332
Arthropoda	Arachnida	Araneae	Lycosidae		Schizocosa	Schizocosa ocreata	Gergin A. Blagoev	RRSPI162-15	BOLD:AAA7232	pending	14-May-2015	Site 1 - Woodland Trail, alvar	43.379	-80.346	288
Arthropoda	Arachnida	Araneae	Lycosidae		Schizocosa	Schizocosa ocreata	Gergin A. Blagoev	RRSSA2487-15	BOLD:AAA7232	pending	31-May-2015	Site 1 - Field Edge Forest	43.374	-80.354	332
Arthropoda	Arachnida	Araneae	Lycosidae		Schizocosa	Schizocosa ocreata	Gergin A. Blagoev	RRSSA2474-15	BOLD:AAA7232	pending	31-May-2015	Site 1 - Field Edge Forest	43.374	-80.354	332
Arthropoda	Arachnida	Araneae	Lycosidae		Schizocosa	Schizocosa ocreata	Gergin A. Blagoev	RRSSA2481-15	BOLD:AAA7232	pending	31-May-2015	Site 1 - Field Edge Forest	43.374	-80.354	332
Arthropoda	Arachnida	Araneae	Lycosidae		Schizocosa	Schizocosa ocreata	Gergin A. Blagoev	RRSSA2503-15	BOLD:AAA7232	pending	31-May-2015	Site 1 - Field Edge Forest	43.374	-80.354	332
Arthropoda	Arachnida	Araneae	Lycosidae		Schizocosa	Schizocosa ocreata	Gergin A. Blagoev	RRSSA2477-15	BOLD:AAA7232	pending	31-May-2015	Site 1 - Field Edge Forest	43.374	-80.354	332
Arthropoda	Arachnida	Araneae	Lycosidae		Schizocosa	Schizocosa ocreata	Gergin A. Blagoev	RRSSA2472-15	BOLD:AAA7232	pending	31-May-2015	Site 1 - Field Edge Forest	43.374	-80.354	332
Arthropoda	Arachnida	Araneae	Lycosidae		Schizocosa	Schizocosa ocreata	Gergin A. Blagoev	RRSSA2452-15	BOLD:AAA7232	pending	31-May-2015	Site 1 - Field Edge Forest	43.374	-80.354	332
Arthropoda	Arachnida	Araneae	Lycosidae		Schizocosa	Schizocosa ocreata	Gergin A. Blagoev	RRSPI212-15	BOLD:AAA7232	pending	27-May-2015	Site 1 - Woodland Trail, alvar	43.379	-80.346	288
Arthropoda	Arachnida	Araneae	Lycosidae		Schizocosa	Schizocosa ocreata	Gergin A. Blagoev	RRSSA2482-15	BOLD:AAA7232	pending	31-May-2015	Site 1 - Field Edge Forest	43.374	-80.354	332
Arthropoda	Arachnida	Araneae	Lycosidae		Schizocosa	Schizocosa ocreata	Gergin A. Blagoev	RRSSA2488-15	BOLD:AAA7232	pending	31-May-2015	Site 1 - Field Edge Forest	43.374	-80.354	332
Arthropoda	Arachnida	Araneae	Lycosidae		Schizocosa	Schizocosa ocreata	Gergin A. Blagoev	RRSSA2486-15	BOLD:AAA7232	pending	31-May-2015	Site 1 - Field Edge Forest	43.374	-80.354	332
Arthropoda	Arachnida	Araneae	Lycosidae		Schizocosa	Schizocosa ocreata	Gergin A. Blagoev	RRSSA2468-15	BOLD:AAA7232	pending	31-May-2015	Site 1 - Field Edge Forest	43.374	-80.354	332
Arthropoda	Arachnida	Araneae	Lycosidae		Schizocosa	Schizocosa ocreata	Gergin A. Blagoev	RRSSA2489-15	BOLD:AAA7232	pending	31-May-2015	Site 1 - Field Edge Forest	43.374	-80.354	332
Arthropoda	Arachnida	Araneae	Lycosidae		Schizocosa	Schizocosa ocreata	Gergin A. Blagoev	RRSSA2497-15	BOLD:AAA7232	pending	31-May-2015	Site 1 - Field Edge Forest	43.374	-80.354	332
Arthropoda	Arachnida	Araneae	Lycosidae		Schizocosa	Schizocosa ocreata	Gergin A. Blagoev	RRSPI194-15	BOLD:AAA7232	pending	21-May-2015	Site 3 - South Field, forest edge	43.37	-80.364	312
Arthropoda	Arachnida	Araneae	Lycosidae		Schizocosa	Schizocosa ocreata	Gergin A. Blagoev	RRSPI027-15	BOLD:AAA7232	pending	07-May-2015	Site 3 - South Field, forest edge	43.37	-80.364	312
Arthropoda	Arachnida	Araneae	Lycosidae		Schizocosa	Schizocosa ocreata	Gergin A. Blagoev	RRSSA2483-15	BOLD:AAA7232	pending	31-May-2015	Site 1 - Field Edge Forest	43.374	-80.354	332
Arthropoda	Arachnida	Araneae	Lycosidae		Schizocosa	Schizocosa ocreata	Gergin A. Blagoev	RRSPI211-15	BOLD:AAA7232	pending	27-May-2015	Site 1 - Woodland Trail, alvar	43.379	-80.346	288
Arthropoda	Arachnida	Araneae	Lycosidae		Schizocosa	Schizocosa ocreata	Gergin A. Blagoev	RRSSA2460-15	BOLD:AAA7232	pending	31-May-2015	Site 1 - Field Edge Forest	43.374	-80.354	332
Arthropoda	Arachnida	Araneae	Lycosidae		Schizocosa	Schizocosa ocreata	Gergin A. Blagoev	RRSSA2461-15	BOLD:AAA7232	pending	31-May-2015	Site 1 - Field Edge Forest	43.374	-80.354	332
Arthropoda	Arachnida	Araneae	Lycosidae		Schizocosa	Schizocosa ocreata	Gergin A. Blagoev	RRSSA2464-15	BOLD:AAA7232	pending	31-May-2015	Site 1 - Field Edge Forest	43.374	-80.354	332
Arthropoda	Arachnida	Araneae	Lycosidae		Schizocosa	Schizocosa ocreata	Gergin A. Blagoev	RRSPI163-15	BOLD:AAA7232	pending	14-May-2015	Site 1 - Woodland Trail, alvar	43.379	-80.346	288
Arthropoda	Arachnida	Araneae	Lycosidae		Schizocosa	Schizocosa ocreata	Gergin A. Blagoev	RRSSA2462-15	BOLD:AAA7232	pending	31-May-2015	Site 1 - Field Edge Forest	43.374	-80.354	332
Arthropoda	Collembola	Entomobryomorpha	Entomobryidae	Entomobryinae	Entomobrya		Angela Telfer	RRMFB1436-15	BOLD:AAA7249	pending	07-May-2015	Site 3 - South Field, forest edge	43.37	-80.364	312
Arthropoda	Collembola	Entomobryomorpha	Entomobryidae	Entomobryinae	Entomobrya		Angela Telfer	RRSSA1337-15	BOLD:AAA7249	pending	31-May-2015	Site 1 - Field Edge Forest	43.374	-80.354	332
Arthropoda	Collembola	Entomobryomorpha	Entomobryidae	Entomobryinae	Entomobrya		Angela Telfer	RRSSA1349-15	BOLD:AAA7249	pending	31-May-2015	Site 1 - Field Edge Forest	43.374	-80.354	332
Arthropoda	Collembola	Entomobryomorpha	Entomobryidae	Entomobryinae	Entomobrya		Angela Telfer	RRMFA374-15	BOLD:AAA7249	pending	29-Apr-2015	Site 3 - South Field, forest edge	43.3705	-80.3641	312
Arthropoda	Collembola	Entomobryomorpha	Entomobryidae	Entomobryinae	Entomobrya		Angela Telfer	RRSSA1355-15	BOLD:AAA7249	pending	31-May-2015	Site 1 - Field Edge Forest	43.374	-80.354	332
Arthropoda	Collembola	Entomobryomorpha	Entomobryidae	Entomobryinae	Entomobrya		Angela Telfer	RRMFB1425-15	BOLD:AAA7249	pending	07-May-2015	Site 3 - South Field, forest edge	43.37	-80.364	312
Arthropoda	Collembola	Entomobryomorpha	Entomobryidae	Entomobryinae	Entomobrya		Angela Telfer	RRMFA390-15	BOLD:AAA7249	pending	29-Apr-2015	Site 3 - South Field, forest edge	43.3705	-80.3641	312
Arthropoda	Collembola	Entomobryomorpha	Entomobryidae	Entomobryinae	Entomobrya		Angela Telfer	RRMFB1423-15	BOLD:AAA7249	pending	07-May-2015	Site 3 - South Field, forest edge	43.37	-80.364	312
Arthropoda	Collembola	Entomobryomorpha	Entomobryidae	Entomobryinae	Entomobrya		Angela Telfer	RRMFA381-15	BOLD:AAA7249	pending	29-Apr-2015	Site 3 - South Field, forest edge	43.3705	-80.3641	312
Arthropoda	Collembola	Entomobryomorpha	Entomobryidae	Entomobryinae	Entomobrya		Angela Telfer	RRSSA1344-15	BOLD:AAA7249	pending	31-May-2015	Site 1 - Field Edge Forest	43.374	-80.354	332
Arthropoda	Collembola	Entomobryomorpha	Entomobryidae	Entomobryinae	Entomobrya		Angela Telfer	RRMFA377-15	BOLD:AAA7249	pending	29-Apr-2015	Site 3 - South Field, forest edge	43.3705	-80.3641	312
Arthropoda	Collembola	Entomobryomorpha	Entomobryidae	Entomobryinae	Entomobrya		Angela Telfer	RRMFB1442-15	BOLD:AAA7249	pending	07-May-2015	Site 3 - South Field, forest edge	43.37	-80.364	312
Arthropoda	Collembola	Entomobryomorpha	Entomobryidae	Entomobryinae	Entomobrya		Angela Telfer	RRSSA1335-15	BOLD:AAA7249	pending	31-May-2015	Site 1 - Field Edge Forest	43.374	-80.354	332
Arthropoda	Collembola	Entomobryomorpha	Entomobryidae	Entomobryinae	Entomobrya		Angela Telfer	RRSSA1352-15	BOLD:AAA7249	pending	31-May-2015	Site 1 - Field Edge Forest	43.374	-80.354	332
Arthropoda	Collembola	Entomobryomorpha	Entomobryidae	Entomobryinae	Entomobrya		Angela Telfer	RRSSA1372-15	BOLD:AAA7249	pending	31-May-2015	Site 1 - Field Edge Forest	43.374	-80.354	332
Arthropoda	Collembola	Entomobryomorpha	Entomobryidae	Entomobryinae	Entomobrya		Angela Telfer	RRMFA378-15	BOLD:AAA7249	pending	29-Apr-2015	Site 3 - South Field, forest edge	43.3705	-80.3641	312
Arthropoda	Collembola	Entomobryomorpha	Entomobryidae	Entomobryinae	Entomobrya		Angela Telfer	RRMFA384-15	BOLD:AAA7249	pending	29-Apr-2015	Site 3 - South Field, forest edge	43.3705	-80.3641	312
Arthropoda	Collembola	Entomobryomorpha	Entomobryidae	Entomobryinae	Entomobrya		Angela Telfer	RRSSA1347-15	BOLD:AAA7249	pending	31-May-2015	Site 1 - Field Edge Forest	43.374	-80.354	332
Arthropoda	Collembola	Entomobryomorpha	Entomobryidae	Entomobryinae	Entomobrya		Angela Telfer	RRSSA1341-15	BOLD:AAA7249	pending	31-May-2015	Site 1 - Field Edge Forest	43.374	-80.354	332
Arthropoda	Collembola	Entomobryomorpha	Entomobryidae	Entomobryinae	Entomobrya		Angela Telfer	RRMFD304-15	BOLD:AAA7249	pending	21-May-2015	Site 3 - South Field, forest edge	43.37	-80.364	312
Arthropoda	Collembola	Entomobryomorpha	Entomobryidae	Entomobryinae	Entomobrya		Angela Telfer	RRSSA1354-15	BOLD:AAA7249	pending	31-May-2015	Site 1 - Field Edge Forest	43.374	-80.354	332
Arthropoda	Collembola	Entomobryomorpha	Entomobryidae	Entomobryinae	Entomobrya		Angela Telfer	RRMFC2378-15	BOLD:AAA7249	pending	14-May-2015	Site 3 - South Field, forest edge	43.37	-80.364	312
Arthropoda	Collembola	Entomobryomorpha	Entomobryidae	Entomobryinae	Entomobrya		Angela Telfer	RRMFC2375-15	BOLD:AAA7249	pending	14-May-2015	Site 3 - South Field, forest edge	43.37	-80.364	312
Arthropoda	Collembola	Entomobryomorpha	Entomobryidae	Entomobryinae	Entomobrya		Angela Telfer	RRMFE3332-15	BOLD:AAA7249	pending	27-May-2015	Site 3 - South Field, forest edge	43.3705	-80.3641	312
Arthropoda	Collembola	Entomobryomorpha	Entomobryidae	Entomobryinae	Entomobrya		Angela Telfer	RRSSA1364-15	BOLD:AAA7249	pending	31-May-2015	Site 1 - Field Edge Forest	43.374	-80.354	332
Arthropoda	Collembola	Entomobryomorpha	Entomobryidae	Entomobryinae	Entomobrya		Angela Telfer	RRMFD309-15	BOLD:AAA7249	pending	21-May-2015	Site 3 - South Field, forest edge	43.37	-80.364	312
Arthropoda	Collembola	Entomobryomorpha	Entomobryidae	Entomobryinae	Entomobrya		Angela Telfer	RRSSA1353-15	BOLD:AAA7249	pending	31-May-2015	Site 1 - Field Edge Forest	43.374	-80.354	332
Arthropoda	Collembola	Entomobryomorpha	Entomobryidae	Entomobryinae	Entomobrya		Angela Telfer	RRMFG2975-15	BOLD:AAA7249	pending	11-Jun-2015	Site 3 - South Field, forest edge	43.37	-80.364	312
Arthropoda	Collembola	Entomobryomorpha	Entomobryidae	Entomobryinae	Entomobrya		Angela Telfer	RRSSA378-15	BOLD:AAA7249	pending	31-May-2015	Site 1 - Field Edge Forest	43.374	-80.354	332
Arthropoda	Collembola	Entomobryomorpha	Entomobryidae	Entomobryinae	Entomobrya		Angela Telfer	RRMFA386-15	BOLD:AAA7249	pending	29-Apr-2015	Site 3 - South Field, forest edge	43.3705	-80.3641	312
Arthropoda	Collembola	Entomobryomorpha	Entomobryidae	Entomobryinae	Entomobrya		Angela Telfer	RRMFC2371-15	BOLD:AAA7249	pending	14-May-2015	Site 3 - South Field, forest edge	43.37	-80.364	312
Arthropoda	Collembola	Entomobryomorpha	Entomobryidae	Entomobryinae	Entomobrya		Angela Telfer	RRMFD306-15	BOLD:AAA7249	pending	21-May-2015	Site 3 - South Field, forest edge	43.37	-80.364	312
Arthropoda	Collembola	Entomobryomorpha	Entomobryidae	Entomobryinae	Entomobrya		Angela Telfer	RRMFC2247-15	BOLD:AAA7249	pending	14-May-2015	Site 3 - South Field, forest edge	43.37	-80.364	312
Arthropoda	Collembola	Entomobryomorpha	Entomobryidae	Entomobryinae	Entomobrya		Angela Telfer	RRSSA357-15	BOLD:AAA7249	pending	31-May-2015	Site 1 - Field Edge Forest	43.374	-80.354	332
Arthropoda	Collembola	Entomobryomorpha	Entomobryidae	Entomobryinae	Entomobrya		Angela Telfer	RRMFD313-15	BOLD:AAA7249	pending	21-May-2015	Site 3 - South Field, forest edge	43.37	-80.364	312
Arthropoda	Collembola	Entomobryomorpha	Entomobryidae	Entomobryinae	Entomobrya		Angela Telfer	RRMFA392-15	BOLD:AAA7249	pending	29-Apr-2015	Site 3 - South Field, forest edge	43.3705	-80.3641	312
Arthropoda	Collembola	Entomobryomorpha	Entomobryidae	Entomobryinae	Entomobrya		Angela Telfer	RRSSA356-15	BOLD:AAA7249	pending	31-May-2015	Site 1 - Field Edge Forest	43.374	-80.354	332
Arthropoda	Collembola	Entomobryomorpha	Entomobryidae	Entomobryinae	Entomobrya		Angela Telfer	RRSSA1351-15	BOLD:AAA7249	pending	31-May-2015	Site 1 - Field Edge Forest	43.374	-80.354	332
Arthropoda	Collembola	Entomobryomorpha	Entomobryidae	Entomobryinae	Entomobrya		Angela Telfer	RRSSA1377-15	BOLD:AAA7249	pending	31-May-2015	Site 1 - Field Edge Forest	43.374	-80.354	332
Arthropoda	Collembola	Entomobryomorpha	Entomobryidae	Entomobryinae	Entomobrya		Angela Telfer	RRMFA382-15	BOLD:AAA7249	pending	29-Apr-2015	Site 3 - South Field, forest edge	43.3705	-80.3641	312
Arthropoda	Collembola	Entomobryomorpha	Entomobryidae	Entomobryinae	Entomobrya		Angela Telfer	RRMFC2245-15	BOLD:AAA7249	pending	14-May-2015	Site 3 - South Field, forest edge	43.37	-80.364	312
Arthropoda	Collembola	Entomobryomorpha	Entomobryidae	Entomobryinae	Entomobrya		Angela Telfer	RRMFD303-15	BOLD:AAA7249	pending	21-May-2015	Site 3 - South Field, forest edge	43.37	-80.364	312
Arthropoda	Collembola	Entomobryomorpha	Entomobryidae	Entomobryinae	Entomobrya		Angela Telfer	RRMFB1420-15	BOLD:AAA7249	pending	07-May-2015	Site 3 - South Field, forest edge	43.37	-80.364	312
Arthropoda	Collembola	Entomobryomorpha	Entomobryidae	Entomobryinae	Entomobrya		Angela Telfer	RRMFB1424-15	BOLD:AAA7249	pending	07-May-2015	Site 3 - South Field, forest edge	43.37	-80.364	312
Arthropoda	Collembola	Entomobryomorpha	Entomobryidae	Entomobryinae	Entomobrya		Angela Telfer	RRMFA385-15	BOLD:AAA7249	pending	29-Apr-2015	Site 3 - South Field, forest edge	43.3705	-80.3641	312
Arthropoda	Collembola	Entomobryomorpha	Entomobryidae	Entomobryinae	Entomobrya		Angela Telfer	RRSSA1376-15	BOLD:AAA7249	pending	31-May-2015	Site 1 - Field Edge Forest	43.374	-80.354	332
Arthropoda	Collembola	Entomobryomorpha	Entomobryidae	Entomobryinae	Entomobrya		Angela Telfer	RRMFC2246-15	BOLD:AAA7249	pending	14-May-2015	Site 3 - South Field, forest edge	43.37	-80.364	312
Arthropoda	Collembola	Entomobryomorpha	Entomobryidae	Entomobryinae	Entomobrya		Angela Telfer	RRMFB1414-15	BOLD:AAA7249	pending	07-May-2015	Site 3 - South Field, forest edge	43.37	-80.364	312
Arthropoda	Collembola	Entomobryomorpha	Entomobryidae	Entomobryinae	Entomobrya		Angela Telfer	RRSSA1332-15	BOLD:AAA7249	pending	31-May-2015	Site 1 - Field Edge Forest	43.374	-80.354	332
Arthropoda	Collembola	Entomobryomorpha	Entomobryidae	Entomobryinae	Entomobrya		Angela Telfer	RRMFC2243-15	BOLD:AAA7249	pending	14-May-2015	Site 3 - South Field, forest edge	43.37	-80.364	312
Arthropoda	Collembola	Entomobryomorpha	Entomobryidae	Entomobryinae	Entomobrya		Angela Telfer	RRSSA376-15	BOLD:AAA7249	pending	31-May-2015	Site 1 - Field Edge Forest	43.374	-80.354	332
Arthropoda	Collembola	Entomobryomorpha	Entomobryidae	Entomobryinae	Entomobrya		Angela Telfer	RRMFB1417-15	BOLD:AAA7249	pending	07-May-2015	Site 3 - South Field, forest edge	43.37	-80.364	312
Arthropoda	Collembola	Entomobryomorpha	Entomobryidae	Entomobryinae	Entomobrya		Angela Telfer	RRMFC2376-15	BOLD:AAA7249	pending	14-May-2015	Site 3 - South Field, forest edge	43.37	-80.364	312
Arthropoda	Collembola	Entomobryomorpha	Entomobryidae	Entomobryinae	Entomobrya		Angela Telfer	RRMFB1416-15	BOLD:AAA7249	pending	07-May-2015	Site 3 - South Field, forest edge	43.37	-80.364	312
Arthropoda	Collembola	Entomobryomorpha	Entomobryidae	Entomobryinae	Entomobrya		Angela Telfer	RRSSA1339-15	BOLD:AAA7249	pending	31-May-2015	Site 1 - Field Edge Forest	43.374	-80.354	332
Arthropoda	Collembola	Entomobryomorpha	Entomobryidae	Entomobryinae	Entomobrya		Angela Telfer	RRMFD302-15	BOLD:AAA7249	pending	21-May-2015	Site 3 - South Field, forest edge	43.37	-80.364	312
Arthropoda	Collembola	Entomobryomorpha	Entomobryidae	Entomobryinae	Entomobrya		Angela Telfer	RRMFC2372-15	BOLD:AAA7249	pending	14-May-2015	Site 3 - South Field, forest edge	43.37	-80.364	312
Arthropoda	Collembola	Entomobryomorpha	Entomobryidae	Entomobryinae	Entomobrya		Angela Telfer	RRSSA1331-15	BOLD:AAA7249	pending	31-May-2015	Site 1 - Field Edge Forest	43.374	-80.354	332
Arthropoda	Collembola	Entomobryomorpha	Entomobryidae	Entomobryinae	Entomobrya		Angela Telfer	RRSSA1361-15	BOLD:AAA7249	pending	31-May-2015	Site 1 - Field Edge Forest	43.374	-80.354	332
Arthropoda	Collembola	Entomobryomorpha	Entomobryidae	Entomobryinae	Entomobrya		Angela Telfer	RRMFB1438-15	BOLD:AAA7249	pending	07-May-2015	Site 3 - South Field, forest edge	43.37	-80.364	312
Arthropoda	Collembola	Entomobryomorpha	Entomobryidae	Entomobryinae	Entomobrya		Angela Telfer	RRMFD312-15	BOLD:AAA7249	pending	21-May-2015	Site 3 - South Field, forest edge	43.37	-80.364	312
Arthropoda	Collembola	Entomobryomorpha	Entomobryidae	Entomobryinae	Entomobrya		Angela Telfer	RRSSA1345-15	BOLD:AAA7249	pending	31-May-2015	Site 1 - Field Edge Forest	43.374	-80.354	332
Arthropoda	Collembola	Entomobryomorpha	Entomobryidae	Entomobryinae	Entomobrya		Angela Telfer	RRSSA1333-15	BOLD:AAA7249	pending	31-May-2015	Site 1 - Field Edge Forest	43.374	-80.354	332
Arthropoda	Collembola	Entomobryomorpha	Entomobryidae	Entomobryinae	Entomobrya		Angela Telfer	RRMFA391-15	BOLD:AAA7249	pending	29-Apr-2015	Site 3 - South Field, forest edge	43.3705	-80.3641	312
Arthropoda	Collembola	Entomobryomorpha	Entomobryidae	Entomobryinae	Entomobrya		Angela Telfer	RRMFD308-15	BOLD:AAA7249	pending	21-May-2015	Site 3 - South Field, forest edge	43.37	-80.364	312
Arthropoda	Collembola	Entomobryomorpha	Entomobryidae	Entomobryinae	Entomobrya		Angela Telfer	RRSSA1342-15	BOLD:AAA7249	pending	31-May-2015	Site 1 - Field Edge Forest	43.374	-80.354	332
Arthropoda	Collembola	Entomobryomorpha	Entomobryidae	Entomobryinae	Entomobrya		Angela Telfer	RRSSA366-15	BOLD:AAA7249	pending	31-May-2015	Site 1 - Field Edge Forest	43.374	-80.354	332
Arthropoda	Collembola	Entomobryomorpha	Entomobryidae	Entomobryinae	Entomobrya		Angela Telfer	RRMFB1432-15	BOLD:AAA7249	pending	07-May-2015	Site 3 - South Field, forest edge	43.37	-80.364	312
Arthropoda	Collembola	Entomobryomorpha	Entomobryidae	Entomobryinae	Entomobrya		Angela Telfer	RRMFB1448-15	BOLD:AAA7249	pending	07-May-2015	Site 3 - South Field, forest edge	43.37	-80.364	312
Arthropoda	Collembola	Entomobryomorpha	Entomobryidae	Entomobryinae	Entomobrya		Angela Telfer	RRMFC2377-15	BOLD:AAA7249	pending	14-May-2015	Site 3 - South Field, forest edge	43.37	-80.364	312
Arthropoda	Collembola	Entomobryomorpha	Entomobryidae	Entomobryinae	Entomobrya		Angela Telfer	RRMFA376-15	BOLD:AAA7249	pending	29-Apr-2015	Site 3 - South Field, forest edge	43.3705	-80.3641	312
Arthropoda	Collembola	Entomobryomorpha	Entomobryidae	Entomobryinae	Entomobrya		Angela Telfer	RRMFC2244-15	BOLD:AAA7249	pending	14-May-2015	Site 3 - South Field, forest edge	43.37	-80.364	312
Arthropoda	Collembola	Entomobryomorpha	Entomobryidae	Entomobryinae	Entomobrya		Angela Telfer	RRSSA1357-15	BOLD:AAA7249	pending	31-May-2015	Site 1 - Field Edge Forest	43.374	-80.354	332
Arthropoda	Collembola	Entomobryomorpha	Entomobryidae	Entomobryinae	Entomobrya		Angela Telfer	RRSSA1375-15	BOLD:AAA7249	pending	31-May-2015	Site 1 - Field Edge Forest	43.374	-80.354	332
Arthropoda	Collembola	Entomobryomorpha	Entomobryidae	Entomobryinae	Entomobrya		Angela Telfer	RRMFA379-15	BOLD:AAA7249	pending	29-Apr-2015	Site 3 - South Field, forest edge	43.3705	-80.3641	312
Arthropoda	Collembola	Entomobryomorpha	Entomobryidae	Entomobryinae	Entomobrya		Angela Telfer	RRSSA1348-15	BOLD:AAA7249	pending	31-May-2015	Site 1 - Field Edge Forest	43.374	-80.354	332
Arthropoda	Collembola	Entomobryomorpha	Entomobryidae	Entomobryinae	Entomobrya		Angela Telfer	RRMFA388-15	BOLD:AAA7249	pending	29-Apr-2015	Site 3 - South Field, forest edge	43.3705	-80.3641	312
Arthropoda	Collembola	Entomobryomorpha	Entomobryidae	Entomobryinae	Entomobrya		Angela Telfer	RRSSA1350-15	BOLD:AAA7249	pending	31-May-2015	Site 1 - Field Edge Forest	43.374	-80.354	332
Arthropoda	Collembola	Entomobryomorpha	Entomobryidae	Entomobryinae	Entomobrya		Angela Telfer	RRSSA1381-15	BOLD:AAA7249	pending	31-May-2015	Site 1 - Field Edge Forest	43.374	-80.354	332
Arthropoda	Collembola	Entomobryomorpha	Entomobryidae	Entomobryinae	Entomobrya		Angela Telfer	RRMFA372-15	BOLD:AAA7249	pending	29-Apr-2015	Site 3 - South Field, forest edge	43.3705	-80.3641	312
Arthropoda	Collembola	Entomobryomorpha	Entomobryidae	Entomobryinae	Entomobrya		Angela Telfer	RRSSA1371-15	BOLD:AAA7249	pending	31-May-2015	Site 1 - Field Edge Forest	43.374	-80.354	332
Arthropoda	Collembola	Entomobryomorpha	Entomobryidae	Entomobryinae	Entomobrya		Angela Telfer	RRMFB1418-15	BOLD:AAA7249	pending	07-May-2015	Site 3 - South Field, forest edge	43.37	-80.364	312
Arthropoda	Collembola	Entomobryomorpha	Entomobryidae	Entomobryinae	Entomobrya		Angela Telfer	RRSSA1370-15	BOLD:AAA7249	pending	31-May-2015	Site 1 - Field Edge Forest	43.374	-80.354	332
Arthropoda	Arachnida	Araneae	Dictynidae		Emblyna	Emblyna sublata	Gergin A. Blagoev	RRSSA1617-15	BOLD:AAA7272	pending	31-May-2015	Site 1 - Field Edge Forest	43.374	-80.354	332
Arthropoda	Arachnida	Araneae	Dictynidae		Emblyna	Emblyna sublata	Gergin A. Blagoev	RRSSA1620-15	BOLD:AAA7272	pending	31-May-2015	Site 1 - Field Edge Forest	43.374	-80.354	332
Arthropoda	Arachnida	Araneae	Dictynidae		Emblyna	Emblyna sublata	Gergin A. Blagoev	RRSSA1616-15	BOLD:AAA7272	pending	31-May-2015	Site 1 - Field Edge Forest	43.374	-80.354	332
Arthropoda	Arachnida	Araneae	Dictynidae		Emblyna	Emblyna sublata	Gergin A. Blagoev	RRMFD1646-15	BOLD:AAA7272	pending	21-May-2015	Site 3 - South Field, forest edge	43.37	-80.364	312
Arthropoda	Arachnida	Araneae	Dictynidae		Emblyna	Emblyna sublata	Gergin A. Blagoev	RRSSA113-15	BOLD:AAA7272	pending	25-May-2015	Site 1 - Field Edge Forest	43.374	-80.354	332
Arthropoda	Arachnida	Araneae	Dictynidae		Emblyna	Emblyna sublata	Gergin A. Blagoev	RRSSA4221-15	BOLD:AAA7272	pending	27-May-2015	Site 1 - Field Edge Forest	43.374	-80.354	332
Arthropoda	Arachnida	Araneae	Dictynidae		Emblyna	Emblyna sublata	Gergin A. Blagoev	RRSSA1619-15	BOLD:AAA7272	pending	31-May-2015	Site 1 - Field Edge Forest	43.374	-80.354	332
Arthropoda	Arachnida	Araneae	Dictynidae		Emblyna	Emblyna sublata	Gergin A. Blagoev	RRSPI150-15	BOLD:AAA7272	pending	29-May-2015	Site 3 - Grassy Wetland	43.391	-80.375	270
Arthropoda	Arachnida	Araneae	Dictynidae		Emblyna	Emblyna sublata	Gergin A. Blagoev	RRMFE2411-15	BOLD:AAA7272	pending	27-May-2015	Site 3 - South Field, forest edge	43.3705	-80.3641	312
Arthropoda	Arachnida	Araneae	Dictynidae		Emblyna	Emblyna sublata	Gergin A. Blagoev	RRSPI305-15	BOLD:AAA7272	pending	25-May-2015	Site 3 - Grassy Wetland	43.391	-80.375	270
Arthropoda	Arachnida	Araneae	Dictynidae		Emblyna	Emblyna sublata	Gergin A. Blagoev	RRSSA4223-15	BOLD:AAA7272	pending	27-May-2015	Site 1 - Field Edge Forest	43.374	-80.354	332
Arthropoda	Arachnida	Araneae	Dictynidae		Emblyna	Emblyna sublata	Gergin A. Blagoev	RRSPI115-15	BOLD:AAA7272	pending	04-Jun-2015	Around the Site 2 and Site 3	43.37	-80.364	312
Arthropoda	Arachnida	Araneae	Dictynidae		Emblyna	Emblyna sublata	Gergin A. Blagoev	RRMFD1644-15	BOLD:AAA7272	pending	21-May-2015	Site 3 - South Field, forest edge	43.37	-80.364	312
Arthropoda	Arachnida	Araneae	Dictynidae		Emblyna	Emblyna sublata	Gergin A. Blagoev	RRSPI141-15	BOLD:AAA7272	pending	27-May-2015	Site 1 - Field Edge Forest	43.374	-80.354	332
Arthropoda	Arachnida	Araneae	Dictynidae		Emblyna	Emblyna sublata	Gergin A. Blagoev	RRSSA2638-15	BOLD:AAA7272	pending	31-May-2015	Site 1 - Field Edge Forest	43.374	-80.354	332
Arthropoda	Insecta	Diptera	Syrphidae	Syrphinae	Sphaerophoria		Angela Telfer	RRMFD143-15	BOLD:AAA7374	pending	21-May-2015	Site 3 - South Field, forest edge	43.37	-80.364	312
Arthropoda	Insecta	Diptera	Syrphidae	Syrphinae	Sphaerophoria		Angela Telfer	RRMFD133-15	BOLD:AAA7374	pending	21-May-2015	Site 3 - South Field, forest edge	43.37	-80.364	312
Arthropoda	Insecta	Diptera	Syrphidae	Syrphinae	Sphaerophoria		Angela Telfer	RRMFB1451-15	BOLD:AAA7374	pending	07-May-2015	Site 3 - South Field, forest edge	43.37	-80.364	312
Arthropoda	Insecta	Diptera	Syrphidae	Syrphinae	Sphaerophoria		Angela Telfer	RRMFD141-15	BOLD:AAA7374	pending	21-May-2015	Site 3 - South Field, forest edge	43.37	-80.364	312
Arthropoda	Insecta	Diptera	Syrphidae	Syrphinae	Sphaerophoria		Angela Telfer	RRMPD009-15	BOLD:AAA7374	pending	21-May-2015	Site 4 - Blair Flats, unburned prairie	43.385	-80.369	264
Arthropoda	Insecta	Diptera	Syrphidae	Syrphinae	Sphaerophoria		Angela Telfer	RRMPE355-15	BOLD:AAA7374	pending	27-May-2015	Site 4 - Blair Flats, unburned prairie	43.385	-80.369	264
Arthropoda	Insecta	Diptera	Syrphidae	Syrphinae	Sphaerophoria		Angela Telfer	RRMFE2909-15	BOLD:AAA7374	pending	27-May-2015	Site 3 - South Field, forest edge	43.3705	-80.3641	312
Arthropoda	Insecta	Diptera	Syrphidae	Syrphinae	Sphaerophoria		Angela Telfer	RRMFE2910-15	BOLD:AAA7374	pending	27-May-2015	Site 3 - South Field, forest edge	43.3705	-80.3641	312
Arthropoda	Insecta	Diptera	Syrphidae	Syrphinae	Sphaerophoria		Angela Telfer	RRMPC873-15	BOLD:AAA7374	pending	14-May-2015	Site 4 - Blair Flats, unburned prairie	43.385	-80.369	264
Arthropoda	Insecta	Diptera	Syrphidae	Syrphinae	Sphaerophoria		Angela Telfer	RRMFE2944-15	BOLD:AAA7374	pending	27-May-2015	Site 3 - South Field, forest edge	43.3705	-80.3641	312
Arthropoda	Insecta	Diptera	Syrphidae	Syrphinae	Sphaerophoria		Angela Telfer	RRMFD036-15	BOLD:AAA7374	pending	21-May-2015	Site 3 - South Field, forest edge	43.37	-80.364	312
Arthropoda	Insecta	Diptera	Syrphidae	Syrphinae	Sphaerophoria		Angela Telfer	RRMPD016-15	BOLD:AAA7374	pending	21-May-2015	Site 4 - Blair Flats, unburned prairie	43.385	-80.369	264
Arthropoda	Insecta	Diptera	Syrphidae	Syrphinae	Sphaerophoria		Angela Telfer	RRMPC872-15	BOLD:AAA7374	pending	14-May-2015	Site 4 - Blair Flats, unburned prairie	43.385	-80.369	264
Arthropoda	Insecta	Diptera	Syrphidae	Syrphinae	Sphaerophoria		Angela Telfer	RRMPD010-15	BOLD:AAA7374	pending	21-May-2015	Site 4 - Blair Flats, unburned prairie	43.385	-80.369	264
Arthropoda	Insecta	Diptera	Syrphidae	Syrphinae	Sphaerophoria		Angela Telfer	RRMFD098-15	BOLD:AAA7374	pending	21-May-2015	Site 3 - South Field, forest edge	43.37	-80.364	312
Arthropoda	Insecta	Diptera	Syrphidae	Syrphinae	Sphaerophoria		Angela Telfer	RRMFD136-15	BOLD:AAA7374	pending	21-May-2015	Site 3 - South Field, forest edge	43.37	-80.364	312
Arthropoda	Insecta	Diptera	Syrphidae	Syrphinae	Sphaerophoria		Angela Telfer	RRMPB015-15	BOLD:AAA7374	pending	07-May-2015	Site 4 - Blair Flats, unburned prairie	43.385	-80.369	264
Arthropoda	Insecta	Diptera	Syrphidae	Syrphinae	Sphaerophoria		Angela Telfer	RRMFE2917-15	BOLD:AAA7374	pending	27-May-2015	Site 3 - South Field, forest edge	43.3705	-80.3641	312
Arthropoda	Insecta	Diptera	Syrphidae	Syrphinae	Sphaerophoria		Angela Telfer	RRMPC877-15	BOLD:AAA7374	pending	14-May-2015	Site 4 - Blair Flats, unburned prairie	43.385	-80.369	264
Arthropoda	Insecta	Diptera	Syrphidae	Syrphinae	Sphaerophoria		Angela Telfer	RRMPE347-15	BOLD:AAA7374	pending	27-May-2015	Site 4 - Blair Flats, unburned prairie	43.385	-80.369	264
Arthropoda	Insecta	Diptera	Syrphidae	Syrphinae	Sphaerophoria		Angela Telfer	RRMFD097-15	BOLD:AAA7374	pending	21-May-2015	Site 3 - South Field, forest edge	43.37	-80.364	312
Arthropoda	Insecta	Diptera	Syrphidae	Syrphinae	Sphaerophoria		Angela Telfer	RRMPB108-15	BOLD:AAA7374	pending	07-May-2015	Site 4 - Blair Flats, unburned prairie	43.385	-80.369	264
Arthropoda	Insecta	Diptera	Syrphidae	Syrphinae	Sphaerophoria		Angela Telfer	RRMFE2908-15	BOLD:AAA7374	pending	27-May-2015	Site 3 - South Field, forest edge	43.3705	-80.3641	312
Arthropoda	Insecta	Diptera	Syrphidae	Syrphinae	Sphaerophoria		Angela Telfer	RRMFD408-15	BOLD:AAA7374	pending	21-May-2015	Site 3 - South Field, forest edge	43.37	-80.364	312
Arthropoda	Insecta	Diptera	Syrphidae	Syrphinae	Sphaerophoria		Angela Telfer	RRMPC874-15	BOLD:AAA7374	pending	14-May-2015	Site 4 - Blair Flats, unburned prairie	43.385	-80.369	264
Arthropoda	Insecta	Diptera	Syrphidae	Syrphinae	Sphaerophoria		Angela Telfer	RRMPD013-15	BOLD:AAA7374	pending	21-May-2015	Site 4 - Blair Flats, unburned prairie	43.385	-80.369	264
Arthropoda	Insecta	Diptera	Syrphidae	Syrphinae	Sphaerophoria		Angela Telfer	RRMFD140-15	BOLD:AAA7374	pending	21-May-2015	Site 3 - South Field, forest edge	43.37	-80.364	312
Arthropoda	Insecta	Lepidoptera	Depressariidae	Depressariinae	Agonopterix	Agonopterix pulvipennella	Angela Telfer	RRMFB1022-15	BOLD:AAA7550	pending	07-May-2015	Site 3 - South Field, forest edge	43.37	-80.364	312
Arthropoda	Insecta	Lepidoptera	Depressariidae	Depressariinae	Agonopterix	Agonopterix pulvipennella	Angela Telfer	RRMFB1025-15	BOLD:AAA7550	pending	07-May-2015	Site 3 - South Field, forest edge	43.37	-80.364	312
Arthropoda	Insecta	Lepidoptera	Depressariidae	Depressariinae	Agonopterix	Agonopterix pulvipennella	Angela Telfer	RRMFB1024-15	BOLD:AAA7550	pending	07-May-2015	Site 3 - South Field, forest edge	43.37	-80.364	312
Arthropoda	Insecta	Lepidoptera	Depressariidae	Depressariinae	Agonopterix	Agonopterix pulvipennella	Angela Telfer	RRMFB1016-15	BOLD:AAA7550	pending	07-May-2015	Site 3 - South Field, forest edge	43.37	-80.364	312
Arthropoda	Insecta	Lepidoptera	Depressariidae	Depressariinae	Agonopterix	Agonopterix pulvipennella	Angela Telfer	RRMPC945-15	BOLD:AAA7550	pending	14-May-2015	Site 4 - Blair Flats, unburned prairie	43.385	-80.369	264
Arthropoda	Insecta	Lepidoptera	Depressariidae	Depressariinae	Agonopterix	Agonopterix pulvipennella	Angela Telfer	RRMFB1010-15	BOLD:AAA7550	pending	07-May-2015	Site 3 - South Field, forest edge	43.37	-80.364	312
Arthropoda	Insecta	Lepidoptera	Depressariidae	Depressariinae	Agonopterix	Agonopterix pulvipennella	Angela Telfer	RRMFB1021-15	BOLD:AAA7550	pending	07-May-2015	Site 3 - South Field, forest edge	43.37	-80.364	312
Arthropoda	Insecta	Lepidoptera	Depressariidae	Depressariinae	Agonopterix	Agonopterix pulvipennella	Angela Telfer	RRMFB1019-15	BOLD:AAA7550	pending	07-May-2015	Site 3 - South Field, forest edge	43.37	-80.364	312
Arthropoda	Insecta	Lepidoptera	Depressariidae	Depressariinae	Agonopterix	Agonopterix pulvipennella	Angela Telfer	RRMFB1027-15	BOLD:AAA7550	pending	07-May-2015	Site 3 - South Field, forest edge	43.37	-80.364	312
Arthropoda	Insecta	Lepidoptera	Depressariidae	Depressariinae	Agonopterix	Agonopterix pulvipennella	Angela Telfer	RRMFB1018-15	BOLD:AAA7550	pending	07-May-2015	Site 3 - South Field, forest edge	43.37	-80.364	312
Arthropoda	Insecta	Lepidoptera	Depressariidae	Depressariinae	Agonopterix	Agonopterix pulvipennella	Angela Telfer	RRMFB1012-15	BOLD:AAA7550	pending	07-May-2015	Site 3 - South Field, forest edge	43.37	-80.364	312
Arthropoda	Insecta	Lepidoptera	Depressariidae	Depressariinae	Agonopterix	Agonopterix pulvipennella	Angela Telfer	RRMFC1991-15	BOLD:AAA7550	pending	14-May-2015	Site 3 - South Field, forest edge	43.37	-80.364	312
Arthropoda	Insecta	Hymenoptera	Braconidae	Alysiinae	Dinotrema		Renee Labbee	RRSSA1242-15	BOLD:AAA7636	pending	31-May-2015	Site 1 - Field Edge Forest	43.374	-80.354	332
Arthropoda	Insecta	Hymenoptera	Braconidae	Alysiinae	Dinotrema		Renee Labbee	RRMFG1444-15	BOLD:AAA7636	pending	11-Jun-2015	Site 3 - South Field, forest edge	43.3705	-80.3641	312
Arthropoda	Insecta	Hymenoptera	Braconidae	Alysiinae	Dinotrema		Renee Labbee	RRMFE1748-15	BOLD:AAA7636	pending	27-May-2015	Site 3 - South Field, forest edge	43.3705	-80.3641	312
Arthropoda	Insecta	Diptera	Culicidae	Culicinae	Culex	Culex restuans	Angela Telfer	RRMFE2603-15	BOLD:AAA7661	pending	27-May-2015	Site 3 - South Field, forest edge	43.3705	-80.3641	312
Arthropoda	Insecta	Diptera	Culicidae	Culicinae	Culex	Culex restuans	Angela Telfer	RRMFC1758-15	BOLD:AAA7661	pending	14-May-2015	Site 3 - South Field, forest edge	43.37	-80.364	312
Arthropoda	Insecta	Diptera	Culicidae	Culicinae	Culex	Culex restuans	Angela Telfer	RRMPD024-15	BOLD:AAA7661	pending	21-May-2015	Site 4 - Blair Flats, unburned prairie	43.385	-80.369	264
Arthropoda	Insecta	Diptera	Culicidae	Culicinae	Culex	Culex restuans	Angela Telfer	RRSSA3581-15	BOLD:AAA7661	pending	27-May-2015	Site 1 - Field Edge Forest	43.374	-80.354	332
Arthropoda	Insecta	Lepidoptera	Tortricidae	Tortricinae	Acleris	Acleris chalybeana	Angela Telfer	RRMFE2899-15	BOLD:AAA7667	pending	27-May-2015	Site 3 - South Field, forest edge	43.3705	-80.3641	312
Arthropoda	Insecta	Lepidoptera	Tortricidae	Tortricinae	Acleris	Acleris chalybeana	Angela Telfer	RRMFE2900-15	BOLD:AAA7667	pending	27-May-2015	Site 3 - South Field, forest edge	43.3705	-80.3641	312
Arthropoda	Insecta	Lepidoptera	Tortricidae	Tortricinae	Acleris	Acleris chalybeana	Angela Telfer	RRMFC1994-15	BOLD:AAA7667	pending	14-May-2015	Site 3 - South Field, forest edge	43.37	-80.364	312
Arthropoda	Insecta	Lepidoptera	Tortricidae	Tortricinae	Acleris	Acleris chalybeana	Angela Telfer	RRMFE2897-15	BOLD:AAA7667	pending	27-May-2015	Site 3 - South Field, forest edge	43.3705	-80.3641	312
Arthropoda	Insecta	Lepidoptera	Tortricidae	Tortricinae	Acleris	Acleris chalybeana	Angela Telfer	RRMFE934-15	BOLD:AAA7667	pending	27-May-2015	Site 3 - South Field, forest edge	43.37	-80.364	312
Arthropoda	Insecta	Lepidoptera	Tortricidae	Tortricinae	Acleris	Acleris chalybeana	Angela Telfer	RRMFC1990-15	BOLD:AAA7667	pending	14-May-2015	Site 3 - South Field, forest edge	43.37	-80.364	312
Arthropoda	Insecta	Lepidoptera	Tortricidae	Tortricinae	Acleris	Acleris chalybeana	Angela Telfer	RRMFE2891-15	BOLD:AAA7667	pending	27-May-2015	Site 3 - South Field, forest edge	43.3705	-80.3641	312
Arthropoda	Insecta	Lepidoptera	Tortricidae	Tortricinae	Acleris	Acleris chalybeana	Angela Telfer	RRMFE928-15	BOLD:AAA7667	pending	27-May-2015	Site 3 - South Field, forest edge	43.37	-80.364	312
Arthropoda	Insecta	Lepidoptera	Tortricidae	Tortricinae	Acleris	Acleris chalybeana	Angela Telfer	RRMFE936-15	BOLD:AAA7667	pending	27-May-2015	Site 3 - South Field, forest edge	43.37	-80.364	312
Arthropoda	Insecta	Lepidoptera	Tortricidae	Tortricinae	Acleris	Acleris chalybeana	Angela Telfer	RRMFB1020-15	BOLD:AAA7667	pending	07-May-2015	Site 3 - South Field, forest edge	43.37	-80.364	312
Arthropoda	Insecta	Lepidoptera	Tortricidae	Tortricinae	Acleris	Acleris chalybeana	Angela Telfer	RRMFD575-15	BOLD:AAA7667	pending	21-May-2015	Site 3 - South Field, forest edge	43.37	-80.364	312
Arthropoda	Insecta	Lepidoptera	Tortricidae	Tortricinae	Acleris	Acleris chalybeana	Angela Telfer	RRMFA250-15	BOLD:AAA7667	pending	29-Apr-2015	Site 3 - South Field, forest edge	43.3705	-80.3641	312
Arthropoda	Insecta	Lepidoptera	Tortricidae	Tortricinae	Acleris	Acleris chalybeana	Angela Telfer	RRMFB1013-15	BOLD:AAA7667	pending	07-May-2015	Site 3 - South Field, forest edge	43.37	-80.364	312
Arthropoda	Insecta	Lepidoptera	Tortricidae	Tortricinae	Acleris	Acleris chalybeana	Angela Telfer	RRMFE2894-15	BOLD:AAA7667	pending	27-May-2015	Site 3 - South Field, forest edge	43.3705	-80.3641	312
Arthropoda	Insecta	Lepidoptera	Tortricidae	Tortricinae	Acleris	Acleris chalybeana	Angela Telfer	RRMFE2890-15	BOLD:AAA7667	pending	27-May-2015	Site 3 - South Field, forest edge	43.3705	-80.3641	312
Arthropoda	Insecta	Lepidoptera	Tortricidae	Tortricinae	Acleris	Acleris chalybeana	Angela Telfer	RRMFE923-15	BOLD:AAA7667	pending	27-May-2015	Site 3 - South Field, forest edge	43.37	-80.364	312
Arthropoda	Insecta	Lepidoptera	Tortricidae	Tortricinae	Acleris	Acleris chalybeana	Angela Telfer	RRMFE927-15	BOLD:AAA7667	pending	27-May-2015	Site 3 - South Field, forest edge	43.37	-80.364	312
Arthropoda	Insecta	Lepidoptera	Tortricidae	Tortricinae	Acleris	Acleris chalybeana	Angela Telfer	RRMFE2889-15	BOLD:AAA7667	pending	27-May-2015	Site 3 - South Field, forest edge	43.3705	-80.3641	312
Arthropoda	Insecta	Lepidoptera	Tortricidae	Tortricinae	Acleris	Acleris chalybeana	Angela Telfer	RRMFA247-15	BOLD:AAA7667	pending	29-Apr-2015	Site 3 - South Field, forest edge	43.3705	-80.3641	312
Arthropoda	Insecta	Lepidoptera	Tortricidae	Tortricinae	Acleris	Acleris chalybeana	Angela Telfer	RRMFE935-15	BOLD:AAA7667	pending	27-May-2015	Site 3 - South Field, forest edge	43.37	-80.364	312
Arthropoda	Insecta	Lepidoptera	Tortricidae	Tortricinae	Acleris	Acleris chalybeana	Angela Telfer	RRMFE933-15	BOLD:AAA7667	pending	27-May-2015	Site 3 - South Field, forest edge	43.37	-80.364	312
Arthropoda	Insecta	Lepidoptera	Tortricidae	Tortricinae	Acleris	Acleris chalybeana	Angela Telfer	RRMFE2898-15	BOLD:AAA7667	pending	27-May-2015	Site 3 - South Field, forest edge	43.3705	-80.3641	312
Arthropoda	Insecta	Lepidoptera	Tortricidae	Tortricinae	Acleris	Acleris chalybeana	Angela Telfer	RRMFB1014-15	BOLD:AAA7667	pending	07-May-2015	Site 3 - South Field, forest edge	43.37	-80.364	312
Arthropoda	Insecta	Lepidoptera	Tortricidae	Tortricinae	Acleris	Acleris chalybeana	Angela Telfer	RRMFE2896-15	BOLD:AAA7667	pending	27-May-2015	Site 3 - South Field, forest edge	43.3705	-80.3641	312
Arthropoda	Insecta	Lepidoptera	Tortricidae	Tortricinae	Acleris	Acleris chalybeana	Angela Telfer	RRMFE2901-15	BOLD:AAA7667	pending	27-May-2015	Site 3 - South Field, forest edge	43.3705	-80.3641	312
Arthropoda	Insecta	Lepidoptera	Tortricidae	Tortricinae	Acleris	Acleris chalybeana	Angela Telfer	RRMFB1015-15	BOLD:AAA7667	pending	07-May-2015	Site 3 - South Field, forest edge	43.37	-80.364	312
Arthropoda	Insecta	Lepidoptera	Tortricidae	Tortricinae	Acleris	Acleris chalybeana	Angela Telfer	RRMFE930-15	BOLD:AAA7667	pending	27-May-2015	Site 3 - South Field, forest edge	43.37	-80.364	312
Arthropoda	Insecta	Lepidoptera	Tortricidae	Tortricinae	Acleris	Acleris chalybeana	Angela Telfer	RRMFC1989-15	BOLD:AAA7667	pending	14-May-2015	Site 3 - South Field, forest edge	43.37	-80.364	312
Arthropoda	Insecta	Lepidoptera	Tortricidae	Tortricinae	Acleris	Acleris chalybeana	Angela Telfer	RRMFE931-15	BOLD:AAA7667	pending	27-May-2015	Site 3 - South Field, forest edge	43.37	-80.364	312
Arthropoda	Insecta	Lepidoptera	Tortricidae	Tortricinae	Acleris	Acleris chalybeana	Angela Telfer	RRMFE2892-15	BOLD:AAA7667	pending	27-May-2015	Site 3 - South Field, forest edge	43.3705	-80.3641	312
Arthropoda	Insecta	Lepidoptera	Tortricidae	Tortricinae	Acleris	Acleris chalybeana	Angela Telfer	RRMFA248-15	BOLD:AAA7667	pending	29-Apr-2015	Site 3 - South Field, forest edge	43.3705	-80.3641	312
Arthropoda	Insecta	Lepidoptera	Tortricidae	Tortricinae	Acleris	Acleris chalybeana	Angela Telfer	RRMFE932-15	BOLD:AAA7667	pending	27-May-2015	Site 3 - South Field, forest edge	43.37	-80.364	312
Arthropoda	Insecta	Lepidoptera	Tortricidae	Tortricinae	Acleris	Acleris chalybeana	Angela Telfer	RRMFE2893-15	BOLD:AAA7667	pending	27-May-2015	Site 3 - South Field, forest edge	43.3705	-80.3641	312
Arthropoda	Insecta	Lepidoptera	Tortricidae	Tortricinae	Acleris	Acleris chalybeana	Angela Telfer	RRMFE2895-15	BOLD:AAA7667	pending	27-May-2015	Site 3 - South Field, forest edge	43.3705	-80.3641	312
Arthropoda	Insecta	Lepidoptera	Tortricidae	Tortricinae	Acleris	Acleris chalybeana	Angela Telfer	RRMFD573-15	BOLD:AAA7667	pending	21-May-2015	Site 3 - South Field, forest edge	43.37	-80.364	312
Arthropoda	Insecta	Lepidoptera	Tortricidae	Tortricinae	Acleris	Acleris chalybeana	Angela Telfer	RRMFA245-15	BOLD:AAA7667	pending	29-Apr-2015	Site 3 - South Field, forest edge	43.3705	-80.3641	312
Arthropoda	Insecta	Lepidoptera	Tortricidae	Tortricinae	Acleris	Acleris chalybeana	Angela Telfer	RRMFA244-15	BOLD:AAA7667	pending	29-Apr-2015	Site 3 - South Field, forest edge	43.3705	-80.3641	312
Arthropoda	Insecta	Lepidoptera	Tortricidae	Tortricinae	Acleris	Acleris chalybeana	Angela Telfer	RRMFG2892-15	BOLD:AAA7667	pending	11-Jun-2015	Site 3 - South Field, forest edge	43.37	-80.364	312
Arthropoda	Insecta	Lepidoptera	Tortricidae	Tortricinae	Acleris	Acleris chalybeana	Angela Telfer	RRMFE924-15	BOLD:AAA7667	pending	27-May-2015	Site 3 - South Field, forest edge	43.37	-80.364	312
Arthropoda	Insecta	Hymenoptera	Braconidae	Microgastrinae	Microgaster		Angela Telfer	RRMFC1825-15	BOLD:AAA7886	pending	14-May-2015	Site 3 - South Field, forest edge	43.37	-80.364	312
Arthropoda	Insecta	Hymenoptera	Braconidae	Microgastrinae	Microgaster		Angela Telfer	RRMFE2609-15	BOLD:AAA7886	pending	27-May-2015	Site 3 - South Field, forest edge	43.3705	-80.3641	312
Arthropoda	Insecta	Hymenoptera	Braconidae	Microgastrinae	Microgaster		Angela Telfer	RRMFE2640-15	BOLD:AAA7886	pending	27-May-2015	Site 3 - South Field, forest edge	43.3705	-80.3641	312
Arthropoda	Insecta	Hymenoptera	Braconidae	Microgastrinae	Microgaster		Angela Telfer	RRMFE2814-15	BOLD:AAA7886	pending	27-May-2015	Site 3 - South Field, forest edge	43.3705	-80.3641	312
Arthropoda	Insecta	Hymenoptera	Braconidae	Microgastrinae	Microgaster		Angela Telfer	RRMFE2643-15	BOLD:AAA7886	pending	27-May-2015	Site 3 - South Field, forest edge	43.3705	-80.3641	312
Arthropoda	Collembola	Entomobryomorpha	Tomoceridae	Tomocerinae	Tomocerus		Angela Telfer	RRSSA2917-15	BOLD:AAA7969	pending	31-May-2015	Site 1 - Field Edge Forest	43.374	-80.354	332
Arthropoda	Collembola	Entomobryomorpha	Tomoceridae	Tomocerinae	Tomocerus		Angela Telfer	RRSSA2237-15	BOLD:AAA7969	pending	31-May-2015	Site 1 - Field Edge Forest	43.374	-80.354	332
Arthropoda	Insecta	Lepidoptera	Tortricidae	Olethreutinae	Eucosma		Mari Kekkonen	RRMFE926-15	BOLD:AAA8046	pending	27-May-2015	Site 3 - South Field, forest edge	43.37	-80.364	312
Arthropoda	Insecta	Lepidoptera	Gelechiidae	Dichomeridinae	Dichomeris	Dichomeris ligulella	Angela Telfer	RRMFD483-15	BOLD:AAA8109	pending	21-May-2015	Site 3 - South Field, forest edge	43.37	-80.364	312
Arthropoda	Insecta	Lepidoptera	Gelechiidae	Dichomeridinae	Dichomeris	Dichomeris ligulella	Angela Telfer	RRMFE925-15	BOLD:AAA8109	pending	27-May-2015	Site 3 - South Field, forest edge	43.37	-80.364	312
Arthropoda	Insecta	Lepidoptera	Gelechiidae	Dichomeridinae	Dichomeris	Dichomeris ligulella	Angela Telfer	RRMFE938-15	BOLD:AAA8109	pending	27-May-2015	Site 3 - South Field, forest edge	43.37	-80.364	312
Arthropoda	Arachnida	Araneae	Linyphiidae		Neriene	Neriene clathrata	Gergin A. Blagoev	RRSPI193-15	BOLD:AAA8358	pending	14-May-2015	Site 3 - South Field, forest edge	43.37	-80.364	312
Arthropoda	Arachnida	Araneae	Araneidae		Araniella	Araniella displicata	Gergin A. Blagoev	RRSPI049-15	BOLD:AAA8399	pending	04-Jun-2015	Site 1 - Woodland Trail, alvar	43.379	-80.346	288
Arthropoda	Insecta	Hymenoptera	Braconidae	Euphorinae	Peristenus		Angela Telfer	RRMPD477-15	BOLD:AAA8464	pending	21-May-2015	Site 4 - Blair Flats, unburned prairie	43.385	-80.369	264
Arthropoda	Insecta	Lepidoptera	Noctuidae	Amphipyrinae	Amphipyra	Amphipyra pyramidoides	Angela Telfer	RRSSA3875-15	BOLD:AAA8525	pending	27-May-2015	Site 1 - Field Edge Forest	43.374	-80.354	332
Arthropoda	Insecta	Lepidoptera	Noctuidae	Amphipyrinae	Amphipyra	Amphipyra pyramidoides	Angela Telfer	RRSSA467-15	BOLD:AAA8525	pending	29-May-2015	Site 1 - Field Edge Forest	43.374	-80.354	332
Arthropoda	Insecta	Lepidoptera	Geometridae	Larentiinae	Xanthorhoe	Xanthorhoe lacustrata	Angela Telfer	RRMFA246-15	BOLD:AAA8660	pending	29-Apr-2015	Site 3 - South Field, forest edge	43.3705	-80.3641	312
Arthropoda	Insecta	Lepidoptera	Geometridae	Larentiinae	Xanthorhoe	Xanthorhoe lacustrata	Angela Telfer	RRMFB1009-15	BOLD:AAA8660	pending	07-May-2015	Site 3 - South Field, forest edge	43.37	-80.364	312
Arthropoda	Collembola	Entomobryomorpha	Entomobryidae	Orchesellinae	Orchesella	Orchesella villosa	Angela Telfer	RRBAA482-15	BOLD:AAA8726	pending	01-May-2015	Site 1 - Woodland Trail, alvar	43.379	-80.346	288
Arthropoda	Arachnida	Araneae	Gnaphosidae		Zelotes	Zelotes hentzi	Gergin A. Blagoev	RRSPI385-15	BOLD:AAA8914	pending	23-Jun-2015	Site 3 - South Field, forest edge	43.3705	-80.3641	312
Arthropoda	Arachnida	Araneae	Gnaphosidae		Zelotes	Zelotes hentzi	Gergin A. Blagoev	RRSPI176-15	BOLD:AAA8914	pending	14-May-2015	Site 2 - South Field, field	43.37	-80.364	312
Arthropoda	Arachnida	Araneae	Gnaphosidae		Zelotes	Zelotes hentzi	Gergin A. Blagoev	RRSPI387-15	BOLD:AAA8914	pending	15-Jul-2015	Site 3 - South Field, forest edge	43.3705	-80.3641	312
Arthropoda	Arachnida	Araneae	Gnaphosidae		Zelotes	Zelotes hentzi	Gergin A. Blagoev	RRSPI063-15	BOLD:AAA8914	pending	04-Jun-2015	Site 2 - South Field, field	43.37	-80.364	312
Arthropoda	Insecta	Lepidoptera	Blastobasidae		Asaphocrita	Asaphocrita busckiella	Angela Telfer	RRSSA4203-15	BOLD:AAA8938	pending	27-May-2015	Site 1 - Field Edge Forest	43.374	-80.354	332
Arthropoda	Arachnida	Araneae	Araneidae		Larinioides	Larinioides cornutus	Gergin A. Blagoev	RRSPI353-15	BOLD:AAA8999	pending	23-Jun-2015	Site 4 - Blair Flats, unburned prairie	43.3854	-80.369	264
Arthropoda	Insecta	Hymenoptera	Formicidae	Formicinae	Lasius	Lasius alienus	Angela Telfer	RRSSA2233-15	BOLD:AAA9049	pending	31-May-2015	Site 1 - Field Edge Forest	43.374	-80.354	332
Arthropoda	Insecta	Hymenoptera	Formicidae	Formicinae	Lasius	Lasius alienus	Angela Telfer	RRSSA4191-15	BOLD:AAA9049	pending	27-May-2015	Site 1 - Field Edge Forest	43.374	-80.354	332
Arthropoda	Insecta	Hymenoptera	Formicidae	Formicinae	Lasius	Lasius alienus	Angela Telfer	RRSSA302-15	BOLD:AAA9049	pending	25-May-2015	Site 1 - Field Edge Forest	43.374	-80.354	332
Arthropoda	Insecta	Hymenoptera	Formicidae	Formicinae	Lasius	Lasius alienus	Angela Telfer	RRSSA4179-15	BOLD:AAA9049	pending	27-May-2015	Site 1 - Field Edge Forest	43.374	-80.354	332
Arthropoda	Insecta	Hymenoptera	Formicidae	Formicinae	Lasius	Lasius alienus	Angela Telfer	RRSSA2600-15	BOLD:AAA9049	pending	31-May-2015	Site 1 - Field Edge Forest	43.374	-80.354	332
Arthropoda	Insecta	Hymenoptera	Formicidae	Formicinae	Lasius	Lasius alienus	Angela Telfer	RRSSA298-15	BOLD:AAA9049	pending	25-May-2015	Site 1 - Field Edge Forest	43.374	-80.354	332
Arthropoda	Insecta	Hymenoptera	Formicidae	Formicinae	Lasius	Lasius alienus	Angela Telfer	RRSSA319-15	BOLD:AAA9049	pending	25-May-2015	Site 1 - Field Edge Forest	43.374	-80.354	332
Arthropoda	Insecta	Hymenoptera	Formicidae	Formicinae	Lasius	Lasius alienus	Angela Telfer	RRMFD1514-15	BOLD:AAA9049	pending	21-May-2015	Site 3 - South Field, forest edge	43.37	-80.364	312
Arthropoda	Insecta	Hymenoptera	Formicidae	Formicinae	Lasius	Lasius alienus	Angela Telfer	RRSSA2593-15	BOLD:AAA9049	pending	31-May-2015	Site 1 - Field Edge Forest	43.374	-80.354	332
Arthropoda	Insecta	Hymenoptera	Formicidae	Formicinae	Lasius	Lasius alienus	Angela Telfer	RRSSA295-15	BOLD:AAA9049	pending	25-May-2015	Site 1 - Field Edge Forest	43.374	-80.354	332
Arthropoda	Insecta	Hymenoptera	Formicidae	Formicinae	Lasius	Lasius alienus	Angela Telfer	RRSSA304-15	BOLD:AAA9049	pending	25-May-2015	Site 1 - Field Edge Forest	43.374	-80.354	332
Arthropoda	Insecta	Hymenoptera	Formicidae	Formicinae	Lasius	Lasius alienus	Angela Telfer	RRSSA2602-15	BOLD:AAA9049	pending	31-May-2015	Site 1 - Field Edge Forest	43.374	-80.354	332
Arthropoda	Insecta	Hymenoptera	Formicidae	Formicinae	Lasius	Lasius alienus	Angela Telfer	RRSSA286-15	BOLD:AAA9049	pending	25-May-2015	Site 1 - Field Edge Forest	43.374	-80.354	332
Arthropoda	Insecta	Hymenoptera	Formicidae	Formicinae	Lasius	Lasius alienus	Angela Telfer	RRSSA294-15	BOLD:AAA9049	pending	25-May-2015	Site 1 - Field Edge Forest	43.374	-80.354	332
Arthropoda	Insecta	Hymenoptera	Formicidae	Formicinae	Lasius	Lasius alienus	Angela Telfer	RRSSA287-15	BOLD:AAA9049	pending	25-May-2015	Site 1 - Field Edge Forest	43.374	-80.354	332
Arthropoda	Insecta	Hymenoptera	Formicidae	Formicinae	Lasius	Lasius alienus	Angela Telfer	RRMFB933-15	BOLD:AAA9049	pending	07-May-2015	Site 3 - South Field, forest edge	43.3705	-80.3641	312
Arthropoda	Insecta	Hymenoptera	Formicidae	Formicinae	Lasius	Lasius alienus	Angela Telfer	RRSSA306-15	BOLD:AAA9049	pending	25-May-2015	Site 1 - Field Edge Forest	43.374	-80.354	332
Arthropoda	Insecta	Hymenoptera	Formicidae	Formicinae	Lasius	Lasius alienus	Angela Telfer	RRSSA297-15	BOLD:AAA9049	pending	25-May-2015	Site 1 - Field Edge Forest	43.374	-80.354	332
Arthropoda	Insecta	Hymenoptera	Formicidae	Formicinae	Lasius	Lasius alienus	Angela Telfer	RRSSA2592-15	BOLD:AAA9049	pending	31-May-2015	Site 1 - Field Edge Forest	43.374	-80.354	332
Arthropoda	Insecta	Hymenoptera	Formicidae	Formicinae	Lasius	Lasius alienus	Angela Telfer	RRSSA4189-15	BOLD:AAA9049	pending	27-May-2015	Site 1 - Field Edge Forest	43.374	-80.354	332
Arthropoda	Insecta	Hymenoptera	Formicidae	Formicinae	Lasius	Lasius alienus	Angela Telfer	RRSSA2590-15	BOLD:AAA9049	pending	31-May-2015	Site 1 - Field Edge Forest	43.374	-80.354	332
Arthropoda	Insecta	Hymenoptera	Formicidae	Formicinae	Lasius	Lasius alienus	Angela Telfer	RRSSA2611-15	BOLD:AAA9049	pending	31-May-2015	Site 1 - Field Edge Forest	43.374	-80.354	332
Arthropoda	Collembola	Entomobryomorpha	Entomobryidae	Lepidocyrtinae	Pseudosinella	Pseudosinella octopunctata	Angela Telfer	RRBGA125-15	BOLD:AAA9292	pending	01-May-2015	Site 2 - South Field, field	43.37	-80.364	312
Arthropoda	Collembola	Entomobryomorpha	Entomobryidae	Lepidocyrtinae	Pseudosinella	Pseudosinella octopunctata	Angela Telfer	RRBGA074-15	BOLD:AAA9292	pending	01-May-2015	Site 2 - South Field, field	43.37	-80.364	312
Arthropoda	Insecta	Hymenoptera	Braconidae	Microgastrinae	Cotesia	Cotesia xylina	Angela Telfer	RRMFD1539-15	BOLD:AAA9386	pending	21-May-2015	Site 3 - South Field, forest edge	43.37	-80.364	312
Arthropoda	Insecta	Hymenoptera	Braconidae	Microgastrinae	Cotesia	Cotesia xylina	Angela Telfer	RRMFE2041-15	BOLD:AAA9386	pending	27-May-2015	Site 3 - South Field, forest edge	43.3705	-80.3641	312
Arthropoda	Insecta	Hymenoptera	Braconidae	Microgastrinae	Cotesia	Cotesia xylina	Angela Telfer	RRMFE2431-15	BOLD:AAA9386	pending	27-May-2015	Site 3 - South Field, forest edge	43.3705	-80.3641	312
Arthropoda	Insecta	Hymenoptera	Braconidae	Microgastrinae	Cotesia	Cotesia xylina	Angela Telfer	RRMFG1980-15	BOLD:AAA9386	pending	11-Jun-2015	Site 3 - South Field, forest edge	43.3705	-80.3641	312
Arthropoda	Insecta	Hymenoptera	Braconidae	Microgastrinae	Cotesia	Cotesia xylina	Angela Telfer	RRMFE2159-15	BOLD:AAA9386	pending	27-May-2015	Site 3 - South Field, forest edge	43.3705	-80.3641	312
Arthropoda	Insecta	Hymenoptera	Braconidae	Microgastrinae	Cotesia	Cotesia xylina	Angela Telfer	RRMFE2100-15	BOLD:AAA9386	pending	27-May-2015	Site 3 - South Field, forest edge	43.3705	-80.3641	312
Arthropoda	Insecta	Hymenoptera	Braconidae	Microgastrinae	Cotesia	Cotesia xylina	Angela Telfer	RRMFG2548-15	BOLD:AAA9386	pending	11-Jun-2015	Site 3 - South Field, forest edge	43.37	-80.364	312
Arthropoda	Insecta	Hymenoptera	Braconidae	Microgastrinae	Cotesia	Cotesia xylina	Angela Telfer	RRMFE2148-15	BOLD:AAA9386	pending	27-May-2015	Site 3 - South Field, forest edge	43.3705	-80.3641	312
Arthropoda	Insecta	Hymenoptera	Braconidae	Microgastrinae	Cotesia	Cotesia xylina	Angela Telfer	RRMFG2270-15	BOLD:AAA9386	pending	11-Jun-2015	Site 3 - South Field, forest edge	43.3705	-80.3641	312
Arthropoda	Insecta	Hemiptera	Cicadellidae	Deltocephalinae	Macrosteles	Macrosteles quadrilineatus	Angela Telfer	RRMFG446-15	BOLD:AAA9422	pending	11-Jun-2015	Site 3 - South Field, forest edge	43.3705	-80.3641	312
Arthropoda	Insecta	Hemiptera	Cicadellidae	Deltocephalinae	Macrosteles	Macrosteles quadrilineatus	Angela Telfer	RRMFE3202-15	BOLD:AAA9422	pending	27-May-2015	Site 3 - South Field, forest edge	43.3705	-80.3641	312
Arthropoda	Insecta	Hymenoptera	Formicidae	Formicinae	Camponotus	Camponotus pennsylvanicus	Angela Telfer	RRSSA1013-15	BOLD:AAA9461	pending	31-May-2015	Site 1 - Field Edge Forest	43.374	-80.354	332
Arthropoda	Insecta	Hymenoptera	Formicidae	Formicinae	Camponotus	Camponotus pennsylvanicus	Angela Telfer	RRMFC1783-15	BOLD:AAA9461	pending	14-May-2015	Site 3 - South Field, forest edge	43.37	-80.364	312
Arthropoda	Insecta	Hymenoptera	Formicidae	Formicinae	Camponotus	Camponotus pennsylvanicus	Angela Telfer	RRMFG2785-15	BOLD:AAA9461	pending	11-Jun-2015	Site 3 - South Field, forest edge	43.37	-80.364	312
Arthropoda	Insecta	Hymenoptera	Formicidae	Formicinae	Camponotus	Camponotus pennsylvanicus	Angela Telfer	RRMFD440-15	BOLD:AAA9461	pending	21-May-2015	Site 3 - South Field, forest edge	43.37	-80.364	312
Arthropoda	Insecta	Hymenoptera	Formicidae	Formicinae	Camponotus	Camponotus pennsylvanicus	Angela Telfer	RRMFG2787-15	BOLD:AAA9461	pending	11-Jun-2015	Site 3 - South Field, forest edge	43.37	-80.364	312
Arthropoda	Insecta	Hymenoptera	Formicidae	Formicinae	Camponotus	Camponotus pennsylvanicus	Angela Telfer	RRMFC2134-15	BOLD:AAA9461	pending	14-May-2015	Site 3 - South Field, forest edge	43.37	-80.364	312
Arthropoda	Insecta	Hymenoptera	Formicidae	Formicinae	Camponotus	Camponotus pennsylvanicus	Angela Telfer	RRMFG2790-15	BOLD:AAA9461	pending	11-Jun-2015	Site 3 - South Field, forest edge	43.37	-80.364	312
Arthropoda	Insecta	Hymenoptera	Formicidae	Formicinae	Camponotus	Camponotus pennsylvanicus	Angela Telfer	RRMFG2788-15	BOLD:AAA9461	pending	11-Jun-2015	Site 3 - South Field, forest edge	43.37	-80.364	312
Arthropoda	Insecta	Hymenoptera	Formicidae	Formicinae	Camponotus	Camponotus pennsylvanicus	Angela Telfer	RRMFE2876-15	BOLD:AAA9461	pending	27-May-2015	Site 3 - South Field, forest edge	43.3705	-80.3641	312
Arthropoda	Insecta	Hymenoptera	Formicidae	Formicinae	Camponotus	Camponotus pennsylvanicus	Angela Telfer	RRMFG2789-15	BOLD:AAA9461	pending	11-Jun-2015	Site 3 - South Field, forest edge	43.37	-80.364	312
Arthropoda	Insecta	Hymenoptera	Formicidae	Formicinae	Camponotus	Camponotus pennsylvanicus	Angela Telfer	RRMFG2791-15	BOLD:AAA9461	pending	11-Jun-2015	Site 3 - South Field, forest edge	43.37	-80.364	312
Arthropoda	Insecta	Hymenoptera	Formicidae	Formicinae	Camponotus	Camponotus pennsylvanicus	Angela Telfer	RRMFE2875-15	BOLD:AAA9461	pending	27-May-2015	Site 3 - South Field, forest edge	43.3705	-80.3641	312
Arthropoda	Insecta	Hymenoptera	Formicidae	Formicinae	Camponotus	Camponotus pennsylvanicus	Angela Telfer	RRMFG2786-15	BOLD:AAA9461	pending	11-Jun-2015	Site 3 - South Field, forest edge	43.37	-80.364	312
Arthropoda	Insecta	Hymenoptera	Formicidae	Formicinae	Camponotus	Camponotus pennsylvanicus	Angela Telfer	RRMFB1159-15	BOLD:AAA9461	pending	07-May-2015	Site 3 - South Field, forest edge	43.37	-80.364	312
Arthropoda	Insecta	Hymenoptera	Formicidae	Formicinae	Camponotus	Camponotus pennsylvanicus	Angela Telfer	RRMFD443-15	BOLD:AAA9461	pending	21-May-2015	Site 3 - South Field, forest edge	43.37	-80.364	312
Arthropoda	Insecta	Hymenoptera	Formicidae	Formicinae	Camponotus	Camponotus pennsylvanicus	Angela Telfer	RRMFE2874-15	BOLD:AAA9461	pending	27-May-2015	Site 3 - South Field, forest edge	43.3705	-80.3641	312
Arthropoda	Insecta	Hymenoptera	Formicidae	Formicinae	Camponotus	Camponotus pennsylvanicus	Angela Telfer	RRMFD446-15	BOLD:AAA9461	pending	21-May-2015	Site 3 - South Field, forest edge	43.37	-80.364	312
Arthropoda	Insecta	Hymenoptera	Formicidae	Formicinae	Camponotus	Camponotus pennsylvanicus	Angela Telfer	RRSSA1019-15	BOLD:AAA9461	pending	31-May-2015	Site 1 - Field Edge Forest	43.374	-80.354	332
Arthropoda	Insecta	Hymenoptera	Formicidae	Formicinae	Camponotus	Camponotus pennsylvanicus	Angela Telfer	RRMFD444-15	BOLD:AAA9461	pending	21-May-2015	Site 3 - South Field, forest edge	43.37	-80.364	312
Arthropoda	Insecta	Hymenoptera	Formicidae	Formicinae	Camponotus	Camponotus pennsylvanicus	Angela Telfer	RRMFG2784-15	BOLD:AAA9461	pending	11-Jun-2015	Site 3 - South Field, forest edge	43.37	-80.364	312
Arthropoda	Insecta	Diptera	Syrphidae	Syrphinae	Platycheirus		Angela Telfer	RRMFE2539-15	BOLD:AAA9506	pending	27-May-2015	Site 3 - South Field, forest edge	43.3705	-80.3641	312
Arthropoda	Insecta	Lepidoptera	Sphingidae	Macroglossinae	Deidamia	Deidamia inscriptum	Angela Telfer	RRMFD577-15	BOLD:AAB0001	pending	21-May-2015	Site 3 - South Field, forest edge	43.37	-80.364	312
Arthropoda	Insecta	Hymenoptera	Braconidae	Microgastrinae			Angela Telfer	RRMFG2256-15	BOLD:AAB0096	pending	11-Jun-2015	Site 3 - South Field, forest edge	43.3705	-80.3641	312
Arthropoda	Insecta	Hymenoptera	Braconidae	Microgastrinae			Angela Telfer	RRMFG2541-15	BOLD:AAB0096	pending	11-Jun-2015	Site 3 - South Field, forest edge	43.37	-80.364	312
Arthropoda	Insecta	Hymenoptera	Braconidae	Microgastrinae			Angela Telfer	RRMFG2537-15	BOLD:AAB0096	pending	11-Jun-2015	Site 3 - South Field, forest edge	43.37	-80.364	312
Arthropoda	Insecta	Hymenoptera	Braconidae	Microgastrinae			Angela Telfer	RRMFG2545-15	BOLD:AAB0096	pending	11-Jun-2015	Site 3 - South Field, forest edge	43.37	-80.364	312
Arthropoda	Insecta	Hymenoptera	Braconidae	Microgastrinae			Angela Telfer	RRMFG2534-15	BOLD:AAB0096	pending	11-Jun-2015	Site 3 - South Field, forest edge	43.37	-80.364	312
Arthropoda	Insecta	Hymenoptera	Braconidae	Microgastrinae			Angela Telfer	RRMFG3277-15	BOLD:AAB0096	pending	11-Jun-2015	Site 3 - South Field, forest edge	43.37	-80.364	312
Arthropoda	Insecta	Hymenoptera	Braconidae	Microgastrinae			Angela Telfer	RRMFG2532-15	BOLD:AAB0096	pending	11-Jun-2015	Site 3 - South Field, forest edge	43.37	-80.364	312
Arthropoda	Insecta	Hymenoptera	Braconidae	Microgastrinae	Diolcogaster		Angela Telfer	RRMPE380-15	BOLD:AAB0185	pending	27-May-2015	Site 4 - Blair Flats, unburned prairie	43.385	-80.369	264
Arthropoda	Insecta	Hymenoptera	Braconidae	Microgastrinae	Diolcogaster		Angela Telfer	RRMFD1464-15	BOLD:AAB0185	pending	21-May-2015	Site 3 - South Field, forest edge	43.37	-80.364	312
Arthropoda	Insecta	Lepidoptera	Geometridae	Ennominae	Alsophila	Alsophila pometaria	Angela Telfer	RRSSA468-15	BOLD:AAB0196	pending	29-May-2015	Site 1 - Field Edge Forest	43.374	-80.354	332
Arthropoda	Insecta	Lepidoptera	Geometridae	Ennominae	Alsophila	Alsophila pometaria	Angela Telfer	RRSSA3873-15	BOLD:AAB0196	pending	27-May-2015	Site 1 - Field Edge Forest	43.374	-80.354	332
Arthropoda	Insecta	Lepidoptera	Geometridae	Ennominae	Alsophila	Alsophila pometaria	Angela Telfer	RRSSA3876-15	BOLD:AAB0196	pending	27-May-2015	Site 1 - Field Edge Forest	43.374	-80.354	332
Arthropoda	Insecta	Lepidoptera	Geometridae	Ennominae	Alsophila	Alsophila pometaria	Angela Telfer	RRMPC838-15	BOLD:AAB0196	pending	14-May-2015	Site 4 - Blair Flats, unburned prairie	43.385	-80.369	264
Arthropoda	Collembola	Poduromorpha	Onychiuridae	Onychiurinae	Protaphorura		Angela Telfer	RRSSA3548-15	BOLD:AAB0246	pending	01-Jun-2015	Site 1 - Field Edge Forest	43.374	-80.354	332
Arthropoda	Arachnida	Araneae	Theridiidae		Neospintharus	Neospintharus trigonum	Gergin A. Blagoev	RRSPI280-15	BOLD:AAB0273	pending	07-May-2015	Around the Site 2 and Site 3	43.37	-80.364	312
Arthropoda	Insecta	Hymenoptera	Braconidae	Microgastrinae	Pholetesor	Pholetesor ornigis	Angela Telfer	RRMFE1090-15	BOLD:AAB0520	pending	27-May-2015	Site 3 - South Field, forest edge	43.37	-80.364	312
Arthropoda	Arachnida	Araneae	Lycosidae		Trochosa	Trochosa ruricola	Gergin A. Blagoev	RRSSA1618-15	BOLD:AAB0726	pending	31-May-2015	Site 1 - Field Edge Forest	43.374	-80.354	332
Arthropoda	Arachnida	Araneae	Lycosidae		Trochosa	Trochosa ruricola	Gergin A. Blagoev	RRSPI005-15	BOLD:AAB0726	pending	29-Apr-2015	Site 2 - South Field, field	43.37	-80.364	312
Arthropoda	Arachnida	Araneae	Lycosidae		Trochosa	Trochosa ruricola	Gergin A. Blagoev	RRSPI170-15	BOLD:AAB0726	pending	07-May-2015	Site 2 - South Field, field	43.37	-80.364	312
Arthropoda	Arachnida	Araneae	Lycosidae		Trochosa	Trochosa ruricola	Gergin A. Blagoev	RRSPI016-15	BOLD:AAB0726	pending	07-May-2015	Site 2 - South Field, field	43.37	-80.364	312
Arthropoda	Arachnida	Araneae	Lycosidae		Trochosa	Trochosa ruricola	Gergin A. Blagoev	RRSPI009-15	BOLD:AAB0726	pending	29-Apr-2015	Site 4 - Blair Flats, unburned prairie	43.385	-80.369	264
Arthropoda	Arachnida	Araneae	Lycosidae		Trochosa	Trochosa ruricola	Gergin A. Blagoev	RRSPI017-15	BOLD:AAB0726	pending	07-May-2015	Site 2 - South Field, field	43.37	-80.364	312
Arthropoda	Arachnida	Araneae	Lycosidae		Trochosa	Trochosa terricola	Gergin A. Blagoev	RRSSA2480-15	BOLD:AAB0727	pending	31-May-2015	Site 1 - Field Edge Forest	43.374	-80.354	332
Arthropoda	Arachnida	Araneae	Lycosidae		Trochosa	Trochosa terricola	Gergin A. Blagoev	RRSPI021-15	BOLD:AAB0727	pending	07-May-2015	Site 3 - South Field, forest edge	43.37	-80.364	312
Arthropoda	Arachnida	Araneae	Lycosidae		Trochosa	Trochosa terricola	Gergin A. Blagoev	RRSPI019-15	BOLD:AAB0727	pending	07-May-2015	Site 3 - South Field, forest edge	43.37	-80.364	312
Arthropoda	Arachnida	Araneae	Lycosidae		Trochosa	Trochosa terricola	Gergin A. Blagoev	RRSPI020-15	BOLD:AAB0727	pending	07-May-2015	Site 3 - South Field, forest edge	43.37	-80.364	312
Arthropoda	Arachnida	Araneae	Lycosidae		Trochosa	Trochosa terricola	Gergin A. Blagoev	RRSSA2493-15	BOLD:AAB0727	pending	31-May-2015	Site 1 - Field Edge Forest	43.374	-80.354	332
Arthropoda	Arachnida	Araneae	Lycosidae		Trochosa	Trochosa terricola	Gergin A. Blagoev	RRSPI002-15	BOLD:AAB0727	pending	29-Apr-2015	Site 1 - Woodland Trail, alvar	43.379	-80.346	288
Arthropoda	Arachnida	Araneae	Lycosidae		Trochosa	Trochosa terricola	Gergin A. Blagoev	RRSPI154-15	BOLD:AAB0727	pending	07-May-2015	Site 1 - Woodland Trail, alvar	43.379	-80.346	288
Arthropoda	Arachnida	Araneae	Lycosidae		Trochosa	Trochosa terricola	Gergin A. Blagoev	RRSPI003-15	BOLD:AAB0727	pending	29-Apr-2015	Site 1 - Woodland Trail, alvar	43.379	-80.346	288
Arthropoda	Arachnida	Araneae	Lycosidae		Trochosa	Trochosa terricola	Gergin A. Blagoev	RRSSA2467-15	BOLD:AAB0727	pending	31-May-2015	Site 1 - Field Edge Forest	43.374	-80.354	332
Arthropoda	Arachnida	Araneae	Lycosidae		Trochosa	Trochosa terricola	Gergin A. Blagoev	RRSPI039-15	BOLD:AAB0727	pending	14-May-2015	Site 1 - Woodland Trail, alvar	43.379	-80.346	288
Arthropoda	Arachnida	Araneae	Lycosidae		Pardosa	Pardosa moesta	Gergin A. Blagoev	RRSPI024-15	BOLD:AAB0863	pending	07-May-2015	Site 3 - South Field, forest edge	43.37	-80.364	312
Arthropoda	Arachnida	Araneae	Lycosidae		Pardosa	Pardosa moesta	Gergin A. Blagoev	RRSPI028-15	BOLD:AAB0863	pending	07-May-2015	Site 3 - South Field, forest edge	43.37	-80.364	312
Arthropoda	Arachnida	Araneae	Lycosidae		Pardosa	Pardosa moesta	Angela Telfer	RRSSC013-15	BOLD:AAB0863	pending	31-May-2015	Site 3 - Grassy Wetland	43.391	-80.375	270
Arthropoda	Arachnida	Araneae	Lycosidae		Pardosa	Pardosa moesta	Gergin A. Blagoev	RRSPI022-15	BOLD:AAB0863	pending	07-May-2015	Site 3 - South Field, forest edge	43.37	-80.364	312
Arthropoda	Arachnida	Araneae	Lycosidae		Pardosa	Pardosa moesta	Gergin A. Blagoev	RRSPI046-15	BOLD:AAB0863	pending	14-May-2015	Site 1 - Woodland Trail, alvar	43.379	-80.346	288
Arthropoda	Arachnida	Araneae	Lycosidae		Pardosa	Pardosa moesta	Gergin A. Blagoev	RRSPI043-15	BOLD:AAB0863	pending	14-May-2015	Site 1 - Woodland Trail, alvar	43.379	-80.346	288
Arthropoda	Arachnida	Araneae	Lycosidae		Pardosa	Pardosa moesta	Gergin A. Blagoev	RRSPI023-15	BOLD:AAB0863	pending	07-May-2015	Site 3 - South Field, forest edge	43.37	-80.364	312
Arthropoda	Arachnida	Araneae	Lycosidae		Pardosa	Pardosa moesta	Gergin A. Blagoev	RRSPI177-15	BOLD:AAB0863	pending	14-May-2015	Site 2 - South Field, field	43.37	-80.364	312
Arthropoda	Arachnida	Araneae	Lycosidae		Pardosa	Pardosa moesta	Gergin A. Blagoev	RRSPI025-15	BOLD:AAB0863	pending	07-May-2015	Site 3 - South Field, forest edge	43.37	-80.364	312
Arthropoda	Arachnida	Araneae	Lycosidae		Pardosa	Pardosa moesta	Gergin A. Blagoev	RRSPI156-15	BOLD:AAB0863	pending	07-May-2015	Site 1 - Woodland Trail, alvar	43.379	-80.346	288
Arthropoda	Arachnida	Araneae	Lycosidae		Pardosa	Pardosa moesta	Gergin A. Blagoev	RRSPI030-15	BOLD:AAB0863	pending	07-May-2015	Site 3 - South Field, forest edge	43.37	-80.364	312
Arthropoda	Arachnida	Araneae	Lycosidae		Pardosa	Pardosa moesta	Gergin A. Blagoev	RRSPI029-15	BOLD:AAB0863	pending	07-May-2015	Site 3 - South Field, forest edge	43.37	-80.364	312
Arthropoda	Arachnida	Araneae	Lycosidae		Pardosa	Pardosa moesta	Gergin A. Blagoev	RRSPI004-15	BOLD:AAB0863	pending	29-Apr-2015	Site 1 - Woodland Trail, alvar	43.379	-80.346	288
Arthropoda	Arachnida	Araneae	Lycosidae		Pardosa	Pardosa moesta	Gergin A. Blagoev	RRMFE2888-15	BOLD:AAB0863	pending	27-May-2015	Site 3 - South Field, forest edge	43.3705	-80.3641	312
Arthropoda	Arachnida	Araneae	Lycosidae		Pardosa	Pardosa moesta	Gergin A. Blagoev	RRSPI026-15	BOLD:AAB0863	pending	07-May-2015	Site 3 - South Field, forest edge	43.37	-80.364	312
Arthropoda	Arachnida	Araneae	Lycosidae		Pardosa	Pardosa moesta	Gergin A. Blagoev	RRMFA394-15	BOLD:AAB0863	pending	29-Apr-2015	Site 3 - South Field, forest edge	43.3705	-80.3641	312
Arthropoda	Arachnida	Araneae	Lycosidae		Pardosa	Pardosa moesta	Gergin A. Blagoev	RRSPI041-15	BOLD:AAB0863	pending	14-May-2015	Site 1 - Woodland Trail, alvar	43.379	-80.346	288
Arthropoda	Arachnida	Araneae	Lycosidae		Pardosa	Pardosa moesta	Gergin A. Blagoev	RRSPI037-15	BOLD:AAB0863	pending	14-May-2015	Site 1 - Woodland Trail, alvar	43.379	-80.346	288
Arthropoda	Arachnida	Araneae	Lycosidae		Pardosa	Pardosa moesta	Gergin A. Blagoev	RRSPI012-15	BOLD:AAB0863	pending	29-Apr-2015	Site 4 - Blair Flats, unburned prairie	43.385	-80.369	264
Arthropoda	Arachnida	Araneae	Lycosidae		Pardosa	Pardosa moesta	Gergin A. Blagoev	RRSPI013-15	BOLD:AAB0863	pending	07-May-2015	Site 1 - Woodland Trail, alvar	43.379	-80.346	288
Arthropoda	Arachnida	Araneae	Lycosidae		Pardosa	Pardosa moesta	Gergin A. Blagoev	RRSPI042-15	BOLD:AAB0863	pending	14-May-2015	Site 1 - Woodland Trail, alvar	43.379	-80.346	288
Arthropoda	Arachnida	Araneae	Lycosidae		Pardosa	Pardosa moesta	Gergin A. Blagoev	RRSPI044-15	BOLD:AAB0863	pending	14-May-2015	Site 1 - Woodland Trail, alvar	43.379	-80.346	288
Arthropoda	Insecta	Diptera	Calliphoridae	Calliphorinae	Cynomya	Cynomya cadaverina	Angela Telfer	RRMPA008-15	BOLD:AAB0868	pending	29-Apr-2015	Site 4 - Blair Flats, unburned prairie	43.3854	-80.369	264
Arthropoda	Insecta	Diptera	Calliphoridae	Calliphorinae	Cynomya	Cynomya cadaverina	Angela Telfer	RRMPB093-15	BOLD:AAB0868	pending	07-May-2015	Site 4 - Blair Flats, unburned prairie	43.385	-80.369	264
Arthropoda	Insecta	Lepidoptera	Noctuidae	Noctuinae	Lithophane		Angela Telfer	RRSSA1303-15	BOLD:AAB1070	pending	31-May-2015	Site 1 - Field Edge Forest	43.374	-80.354	332
Arthropoda	Insecta	Lepidoptera	Blastobasidae		Blastobasis	Blastobasis glandulella	Jayme E. Sones	RRSSA3532-15	BOLD:AAB1096	pending	31-May-2015	Site 1 - Field Edge Forest	43.374	-80.354	332
Arthropoda	Insecta	Diptera	Culicidae	Culicinae	Aedes		Angela Telfer	RRSSA2045-15	BOLD:AAB1098	pending	29-May-2015	Site 1 - Field Edge Forest	43.374	-80.354	332
Arthropoda	Insecta	Diptera	Culicidae	Culicinae	Aedes		Angela Telfer	RRSSA3582-15	BOLD:AAB1098	pending	27-May-2015	Site 1 - Field Edge Forest	43.374	-80.354	332
Arthropoda	Insecta	Diptera	Culicidae	Culicinae	Aedes		Angela Telfer	RRSSA3773-15	BOLD:AAB1098	pending	27-May-2015	Site 1 - Field Edge Forest	43.374	-80.354	332
Arthropoda	Insecta	Diptera	Culicidae	Culicinae	Aedes		Angela Telfer	RRSSA1991-15	BOLD:AAB1098	pending	25-May-2015	Site 1 - Field Edge Forest	43.374	-80.354	332
Arthropoda	Insecta	Diptera	Culicidae	Culicinae	Aedes		Angela Telfer	RRSSA2012-15	BOLD:AAB1098	pending	25-May-2015	Site 1 - Field Edge Forest	43.374	-80.354	332
Arthropoda	Insecta	Diptera	Culicidae	Culicinae	Aedes		Angela Telfer	RRSSA1986-15	BOLD:AAB1098	pending	25-May-2015	Site 1 - Field Edge Forest	43.374	-80.354	332
Arthropoda	Insecta	Diptera	Culicidae	Culicinae	Aedes		Angela Telfer	RRSSA2041-15	BOLD:AAB1098	pending	29-May-2015	Site 1 - Field Edge Forest	43.374	-80.354	332
Arthropoda	Insecta	Diptera	Culicidae	Culicinae	Aedes		Angela Telfer	RRSSA3739-15	BOLD:AAB1098	pending	27-May-2015	Site 1 - Field Edge Forest	43.374	-80.354	332
Arthropoda	Insecta	Diptera	Culicidae	Culicinae	Aedes		Angela Telfer	RRSSA2011-15	BOLD:AAB1098	pending	25-May-2015	Site 1 - Field Edge Forest	43.374	-80.354	332
Arthropoda	Insecta	Diptera	Culicidae	Culicinae	Aedes		Angela Telfer	RRSSA1996-15	BOLD:AAB1098	pending	25-May-2015	Site 1 - Field Edge Forest	43.374	-80.354	332
Arthropoda	Insecta	Diptera	Culicidae	Culicinae	Aedes		Angela Telfer	RRSSA410-15	BOLD:AAB1098	pending	29-May-2015	Site 1 - Field Edge Forest	43.374	-80.354	332
Arthropoda	Insecta	Diptera	Culicidae	Culicinae	Aedes		Angela Telfer	RRSSA3788-15	BOLD:AAB1098	pending	27-May-2015	Site 1 - Field Edge Forest	43.374	-80.354	332
Arthropoda	Insecta	Diptera	Culicidae	Culicinae	Aedes		Angela Telfer	RRSSA2049-15	BOLD:AAB1098	pending	29-May-2015	Site 1 - Field Edge Forest	43.374	-80.354	332
Arthropoda	Insecta	Diptera	Culicidae	Culicinae	Aedes		Angela Telfer	RRSSA3803-15	BOLD:AAB1098	pending	27-May-2015	Site 1 - Field Edge Forest	43.374	-80.354	332
Arthropoda	Insecta	Diptera	Culicidae	Culicinae	Aedes		Angela Telfer	RRSSA1981-15	BOLD:AAB1098	pending	25-May-2015	Site 1 - Field Edge Forest	43.374	-80.354	332
Arthropoda	Insecta	Diptera	Culicidae	Culicinae	Aedes		Angela Telfer	RRSSA3282-15	BOLD:AAB1098	pending	27-May-2015	Site 1 - Field Edge Forest	43.374	-80.354	332
Arthropoda	Insecta	Diptera	Culicidae	Culicinae	Aedes		Angela Telfer	RRSSA1987-15	BOLD:AAB1098	pending	25-May-2015	Site 1 - Field Edge Forest	43.374	-80.354	332
Arthropoda	Insecta	Diptera	Culicidae	Culicinae	Aedes		Angela Telfer	RRSSA2014-15	BOLD:AAB1098	pending	25-May-2015	Site 1 - Field Edge Forest	43.374	-80.354	332
Arthropoda	Insecta	Diptera	Culicidae	Culicinae	Aedes		Angela Telfer	RRSSA3575-15	BOLD:AAB1098	pending	27-May-2015	Site 1 - Field Edge Forest	43.374	-80.354	332
Arthropoda	Insecta	Diptera	Culicidae	Culicinae	Aedes		Angela Telfer	RRSSA3763-15	BOLD:AAB1098	pending	27-May-2015	Site 1 - Field Edge Forest	43.374	-80.354	332
Arthropoda	Insecta	Diptera	Culicidae	Culicinae	Aedes		Angela Telfer	RRSSA3777-15	BOLD:AAB1098	pending	27-May-2015	Site 1 - Field Edge Forest	43.374	-80.354	332
Arthropoda	Insecta	Diptera	Culicidae	Culicinae	Aedes		Angela Telfer	RRSSA3738-15	BOLD:AAB1098	pending	27-May-2015	Site 1 - Field Edge Forest	43.374	-80.354	332
Arthropoda	Insecta	Diptera	Culicidae	Culicinae	Aedes		Angela Telfer	RRSSA2542-15	BOLD:AAB1098	pending	31-May-2015	Site 1 - Field Edge Forest	43.374	-80.354	332
Arthropoda	Insecta	Diptera	Culicidae	Culicinae	Aedes		Angela Telfer	RRSSA1995-15	BOLD:AAB1098	pending	25-May-2015	Site 1 - Field Edge Forest	43.374	-80.354	332
Arthropoda	Insecta	Diptera	Culicidae	Culicinae	Aedes		Angela Telfer	RRSSA2052-15	BOLD:AAB1098	pending	29-May-2015	Site 1 - Field Edge Forest	43.374	-80.354	332
Arthropoda	Insecta	Diptera	Culicidae	Culicinae	Aedes		Angela Telfer	RRSSA2002-15	BOLD:AAB1098	pending	25-May-2015	Site 1 - Field Edge Forest	43.374	-80.354	332
Arthropoda	Insecta	Diptera	Culicidae	Culicinae	Aedes		Angela Telfer	RRSSA2053-15	BOLD:AAB1098	pending	29-May-2015	Site 1 - Field Edge Forest	43.374	-80.354	332
Arthropoda	Insecta	Diptera	Culicidae	Culicinae	Aedes		Angela Telfer	RRSSA061-15	BOLD:AAB1098	pending	25-May-2015	Site 1 - Field Edge Forest	43.374	-80.354	332
Arthropoda	Insecta	Diptera	Culicidae	Culicinae	Aedes		Angela Telfer	RRSSA3755-15	BOLD:AAB1098	pending	27-May-2015	Site 1 - Field Edge Forest	43.374	-80.354	332
Arthropoda	Insecta	Diptera	Culicidae	Culicinae	Aedes		Angela Telfer	RRSSA3768-15	BOLD:AAB1098	pending	27-May-2015	Site 1 - Field Edge Forest	43.374	-80.354	332
Arthropoda	Insecta	Diptera	Culicidae	Culicinae	Aedes		Angela Telfer	RRSSA3762-15	BOLD:AAB1098	pending	27-May-2015	Site 1 - Field Edge Forest	43.374	-80.354	332
Arthropoda	Insecta	Diptera	Culicidae	Culicinae	Aedes		Angela Telfer	RRSSA1978-15	BOLD:AAB1098	pending	25-May-2015	Site 1 - Field Edge Forest	43.374	-80.354	332
Arthropoda	Insecta	Diptera	Culicidae	Culicinae	Aedes		Angela Telfer	RRSSA1989-15	BOLD:AAB1098	pending	25-May-2015	Site 1 - Field Edge Forest	43.374	-80.354	332
Arthropoda	Insecta	Diptera	Culicidae	Culicinae	Aedes		Angela Telfer	RRSSA2024-15	BOLD:AAB1098	pending	25-May-2015	Site 1 - Field Edge Forest	43.374	-80.354	332
Arthropoda	Insecta	Diptera	Culicidae	Culicinae	Aedes		Angela Telfer	RRSSA128-15	BOLD:AAB1098	pending	25-May-2015	Site 1 - Field Edge Forest	43.374	-80.354	332
Arthropoda	Insecta	Diptera	Culicidae	Culicinae	Aedes		Angela Telfer	RRSSA3753-15	BOLD:AAB1098	pending	27-May-2015	Site 1 - Field Edge Forest	43.374	-80.354	332
Arthropoda	Insecta	Diptera	Culicidae	Culicinae	Aedes		Angela Telfer	RRSSA2057-15	BOLD:AAB1098	pending	29-May-2015	Site 1 - Field Edge Forest	43.374	-80.354	332
Arthropoda	Insecta	Diptera	Culicidae	Culicinae	Aedes		Angela Telfer	RRSSA3577-15	BOLD:AAB1098	pending	27-May-2015	Site 1 - Field Edge Forest	43.374	-80.354	332
Arthropoda	Insecta	Diptera	Culicidae	Culicinae	Aedes		Angela Telfer	RRSSA2026-15	BOLD:AAB1098	pending	25-May-2015	Site 1 - Field Edge Forest	43.374	-80.354	332
Arthropoda	Insecta	Diptera	Culicidae	Culicinae	Aedes		Angela Telfer	RRSSA2007-15	BOLD:AAB1098	pending	25-May-2015	Site 1 - Field Edge Forest	43.374	-80.354	332
Arthropoda	Insecta	Diptera	Culicidae	Culicinae	Aedes		Angela Telfer	RRSSA2023-15	BOLD:AAB1098	pending	25-May-2015	Site 1 - Field Edge Forest	43.374	-80.354	332
Arthropoda	Insecta	Diptera	Culicidae	Culicinae	Aedes		Angela Telfer	RRSSA2051-15	BOLD:AAB1098	pending	29-May-2015	Site 1 - Field Edge Forest	43.374	-80.354	332
Arthropoda	Insecta	Diptera	Culicidae	Culicinae	Aedes		Angela Telfer	RRSSA1979-15	BOLD:AAB1098	pending	25-May-2015	Site 1 - Field Edge Forest	43.374	-80.354	332
Arthropoda	Insecta	Diptera	Culicidae	Culicinae	Aedes		Angela Telfer	RRSSA3759-15	BOLD:AAB1098	pending	27-May-2015	Site 1 - Field Edge Forest	43.374	-80.354	332
Arthropoda	Insecta	Diptera	Culicidae	Culicinae	Aedes		Angela Telfer	RRSSA2013-15	BOLD:AAB1098	pending	25-May-2015	Site 1 - Field Edge Forest	43.374	-80.354	332
Arthropoda	Insecta	Diptera	Culicidae	Culicinae	Aedes		Angela Telfer	RRSSA584-15	BOLD:AAB1098	pending	29-May-2015	Site 1 - Field Edge Forest	43.374	-80.354	332
Arthropoda	Insecta	Diptera	Culicidae	Culicinae	Aedes		Angela Telfer	RRSSA2017-15	BOLD:AAB1098	pending	25-May-2015	Site 1 - Field Edge Forest	43.374	-80.354	332
Arthropoda	Insecta	Diptera	Culicidae	Culicinae	Aedes		Angela Telfer	RRSSA066-15	BOLD:AAB1098	pending	25-May-2015	Site 1 - Field Edge Forest	43.374	-80.354	332
Arthropoda	Insecta	Diptera	Culicidae	Culicinae	Aedes		Angela Telfer	RRSSA3812-15	BOLD:AAB1098	pending	27-May-2015	Site 1 - Field Edge Forest	43.374	-80.354	332
Arthropoda	Insecta	Diptera	Culicidae	Culicinae	Aedes		Angela Telfer	RRSSA2038-15	BOLD:AAB1098	pending	29-May-2015	Site 1 - Field Edge Forest	43.374	-80.354	332
Arthropoda	Insecta	Diptera	Culicidae	Culicinae	Aedes		Angela Telfer	RRSSA3774-15	BOLD:AAB1098	pending	27-May-2015	Site 1 - Field Edge Forest	43.374	-80.354	332
Arthropoda	Insecta	Diptera	Culicidae	Culicinae	Aedes		Angela Telfer	RRSSA1984-15	BOLD:AAB1098	pending	25-May-2015	Site 1 - Field Edge Forest	43.374	-80.354	332
Arthropoda	Insecta	Diptera	Culicidae	Culicinae	Aedes		Angela Telfer	RRSSA3770-15	BOLD:AAB1098	pending	27-May-2015	Site 1 - Field Edge Forest	43.374	-80.354	332
Arthropoda	Insecta	Diptera	Culicidae	Culicinae	Aedes		Angela Telfer	RRSSA3742-15	BOLD:AAB1098	pending	27-May-2015	Site 1 - Field Edge Forest	43.374	-80.354	332
Arthropoda	Insecta	Diptera	Culicidae	Culicinae	Aedes		Angela Telfer	RRSSA1985-15	BOLD:AAB1098	pending	25-May-2015	Site 1 - Field Edge Forest	43.374	-80.354	332
Arthropoda	Insecta	Diptera	Culicidae	Culicinae	Aedes		Angela Telfer	RRSSA172-15	BOLD:AAB1098	pending	25-May-2015	Site 1 - Field Edge Forest	43.374	-80.354	332
Arthropoda	Insecta	Diptera	Culicidae	Culicinae	Aedes		Angela Telfer	RRSSA2043-15	BOLD:AAB1098	pending	29-May-2015	Site 1 - Field Edge Forest	43.374	-80.354	332
Arthropoda	Insecta	Diptera	Culicidae	Culicinae	Aedes		Angela Telfer	RRSSA2042-15	BOLD:AAB1098	pending	29-May-2015	Site 1 - Field Edge Forest	43.374	-80.354	332
Arthropoda	Insecta	Diptera	Culicidae	Culicinae	Aedes		Angela Telfer	RRBPA067-15	BOLD:AAB1098	pending	01-May-2015	Site 4 - Blair Flats, unburned prairie	43.385	-80.369	264
Arthropoda	Insecta	Diptera	Culicidae	Culicinae	Aedes		Angela Telfer	RRSSA1993-15	BOLD:AAB1098	pending	25-May-2015	Site 1 - Field Edge Forest	43.374	-80.354	332
Arthropoda	Insecta	Diptera	Culicidae	Culicinae	Aedes		Angela Telfer	RRSSA3760-15	BOLD:AAB1098	pending	27-May-2015	Site 1 - Field Edge Forest	43.374	-80.354	332
Arthropoda	Insecta	Diptera	Culicidae	Culicinae	Aedes		Angela Telfer	RRMFC1774-15	BOLD:AAB1098	pending	14-May-2015	Site 3 - South Field, forest edge	43.37	-80.364	312
Arthropoda	Insecta	Diptera	Culicidae	Culicinae	Aedes		Angela Telfer	RRSSA3766-15	BOLD:AAB1098	pending	27-May-2015	Site 1 - Field Edge Forest	43.374	-80.354	332
Arthropoda	Insecta	Diptera	Culicidae	Culicinae	Aedes		Angela Telfer	RRSSA2006-15	BOLD:AAB1098	pending	25-May-2015	Site 1 - Field Edge Forest	43.374	-80.354	332
Arthropoda	Insecta	Diptera	Culicidae	Culicinae	Aedes		Angela Telfer	RRSSA3761-15	BOLD:AAB1098	pending	27-May-2015	Site 1 - Field Edge Forest	43.374	-80.354	332
Arthropoda	Insecta	Diptera	Culicidae	Culicinae	Aedes		Angela Telfer	RRSSA2054-15	BOLD:AAB1098	pending	29-May-2015	Site 1 - Field Edge Forest	43.374	-80.354	332
Arthropoda	Insecta	Diptera	Culicidae	Culicinae	Aedes		Angela Telfer	RRSSA3805-15	BOLD:AAB1098	pending	27-May-2015	Site 1 - Field Edge Forest	43.374	-80.354	332
Arthropoda	Insecta	Diptera	Culicidae	Culicinae	Aedes		Angela Telfer	RRSSA2036-15	BOLD:AAB1098	pending	29-May-2015	Site 1 - Field Edge Forest	43.374	-80.354	332
Arthropoda	Insecta	Diptera	Culicidae	Culicinae	Aedes		Angela Telfer	RRSSA1977-15	BOLD:AAB1098	pending	25-May-2015	Site 1 - Field Edge Forest	43.374	-80.354	332
Arthropoda	Insecta	Diptera	Culicidae	Culicinae	Aedes		Angela Telfer	RRSSA3822-15	BOLD:AAB1098	pending	27-May-2015	Site 1 - Field Edge Forest	43.374	-80.354	332
Arthropoda	Insecta	Diptera	Culicidae	Culicinae	Aedes		Angela Telfer	RRSSA3757-15	BOLD:AAB1098	pending	27-May-2015	Site 1 - Field Edge Forest	43.374	-80.354	332
Arthropoda	Insecta	Diptera	Culicidae	Culicinae	Aedes		Angela Telfer	RRSSA2047-15	BOLD:AAB1098	pending	29-May-2015	Site 1 - Field Edge Forest	43.374	-80.354	332
Arthropoda	Insecta	Diptera	Culicidae	Culicinae	Aedes		Angela Telfer	RRSSA431-15	BOLD:AAB1098	pending	29-May-2015	Site 1 - Field Edge Forest	43.374	-80.354	332
Arthropoda	Insecta	Diptera	Culicidae	Culicinae	Aedes		Angela Telfer	RRSSA2050-15	BOLD:AAB1098	pending	29-May-2015	Site 1 - Field Edge Forest	43.374	-80.354	332
Arthropoda	Insecta	Diptera	Culicidae	Culicinae	Aedes		Angela Telfer	RRSSA469-15	BOLD:AAB1098	pending	29-May-2015	Site 1 - Field Edge Forest	43.374	-80.354	332
Arthropoda	Insecta	Diptera	Culicidae	Culicinae	Aedes		Angela Telfer	RRSSA3800-15	BOLD:AAB1098	pending	27-May-2015	Site 1 - Field Edge Forest	43.374	-80.354	332
Arthropoda	Insecta	Diptera	Culicidae	Culicinae	Aedes		Angela Telfer	RRSSA2025-15	BOLD:AAB1098	pending	25-May-2015	Site 1 - Field Edge Forest	43.374	-80.354	332
Arthropoda	Insecta	Diptera	Culicidae	Culicinae	Aedes		Angela Telfer	RRSSA196-15	BOLD:AAB1098	pending	25-May-2015	Site 1 - Field Edge Forest	43.374	-80.354	332
Arthropoda	Insecta	Diptera	Culicidae	Culicinae	Aedes		Angela Telfer	RRSSA1998-15	BOLD:AAB1098	pending	25-May-2015	Site 1 - Field Edge Forest	43.374	-80.354	332
Arthropoda	Insecta	Diptera	Culicidae	Culicinae	Aedes		Angela Telfer	RRSSA3752-15	BOLD:AAB1098	pending	27-May-2015	Site 1 - Field Edge Forest	43.374	-80.354	332
Arthropoda	Insecta	Diptera	Culicidae	Culicinae	Aedes		Angela Telfer	RRSSA633-15	BOLD:AAB1098	pending	29-May-2015	Site 1 - Field Edge Forest	43.374	-80.354	332
Arthropoda	Insecta	Diptera	Culicidae	Culicinae	Aedes		Angela Telfer	RRSSA2015-15	BOLD:AAB1098	pending	25-May-2015	Site 1 - Field Edge Forest	43.374	-80.354	332
Arthropoda	Insecta	Diptera	Culicidae	Culicinae	Aedes		Angela Telfer	RRSSA2040-15	BOLD:AAB1098	pending	29-May-2015	Site 1 - Field Edge Forest	43.374	-80.354	332
Arthropoda	Insecta	Diptera	Culicidae	Culicinae	Aedes		Angela Telfer	RRSSA2016-15	BOLD:AAB1098	pending	25-May-2015	Site 1 - Field Edge Forest	43.374	-80.354	332
Arthropoda	Insecta	Diptera	Culicidae	Culicinae	Aedes		Angela Telfer	RRSSA3745-15	BOLD:AAB1098	pending	27-May-2015	Site 1 - Field Edge Forest	43.374	-80.354	332
Arthropoda	Insecta	Diptera	Culicidae	Culicinae	Aedes		Angela Telfer	RRSSA2001-15	BOLD:AAB1098	pending	25-May-2015	Site 1 - Field Edge Forest	43.374	-80.354	332
Arthropoda	Insecta	Diptera	Culicidae	Culicinae	Aedes		Angela Telfer	RRSSA1994-15	BOLD:AAB1098	pending	25-May-2015	Site 1 - Field Edge Forest	43.374	-80.354	332
Arthropoda	Insecta	Diptera	Culicidae	Culicinae	Aedes		Angela Telfer	RRSSA2039-15	BOLD:AAB1098	pending	29-May-2015	Site 1 - Field Edge Forest	43.374	-80.354	332
Arthropoda	Insecta	Diptera	Culicidae	Culicinae	Aedes		Angela Telfer	RRSSA3817-15	BOLD:AAB1098	pending	27-May-2015	Site 1 - Field Edge Forest	43.374	-80.354	332
Arthropoda	Insecta	Diptera	Culicidae	Culicinae	Aedes		Angela Telfer	RRSSA3764-15	BOLD:AAB1098	pending	27-May-2015	Site 1 - Field Edge Forest	43.374	-80.354	332
Arthropoda	Insecta	Diptera	Culicidae	Culicinae	Aedes		Angela Telfer	RRSSA2055-15	BOLD:AAB1098	pending	29-May-2015	Site 1 - Field Edge Forest	43.374	-80.354	332
Arthropoda	Insecta	Diptera	Culicidae	Culicinae	Aedes		Angela Telfer	RRSSA1980-15	BOLD:AAB1098	pending	25-May-2015	Site 1 - Field Edge Forest	43.374	-80.354	332
Arthropoda	Insecta	Diptera	Culicidae	Culicinae	Aedes		Angela Telfer	RRSSA394-15	BOLD:AAB1098	pending	29-May-2015	Site 1 - Field Edge Forest	43.374	-80.354	332
Arthropoda	Insecta	Diptera	Culicidae	Culicinae	Aedes		Angela Telfer	RRSSA2037-15	BOLD:AAB1098	pending	29-May-2015	Site 1 - Field Edge Forest	43.374	-80.354	332
Arthropoda	Insecta	Diptera	Culicidae	Culicinae	Aedes		Angela Telfer	RRSSA3771-15	BOLD:AAB1098	pending	27-May-2015	Site 1 - Field Edge Forest	43.374	-80.354	332
Arthropoda	Insecta	Diptera	Culicidae	Culicinae	Aedes		Angela Telfer	RRSSA392-15	BOLD:AAB1098	pending	29-May-2015	Site 1 - Field Edge Forest	43.374	-80.354	332
Arthropoda	Insecta	Diptera	Culicidae	Culicinae	Aedes		Angela Telfer	RRSSA397-15	BOLD:AAB1098	pending	29-May-2015	Site 1 - Field Edge Forest	43.374	-80.354	332
Arthropoda	Insecta	Diptera	Culicidae	Culicinae	Aedes		Angela Telfer	RRSSA2010-15	BOLD:AAB1098	pending	25-May-2015	Site 1 - Field Edge Forest	43.374	-80.354	332
Arthropoda	Insecta	Diptera	Culicidae	Culicinae	Aedes		Angela Telfer	RRSSA2046-15	BOLD:AAB1098	pending	29-May-2015	Site 1 - Field Edge Forest	43.374	-80.354	332
Arthropoda	Insecta	Diptera	Culicidae	Culicinae	Aedes		Angela Telfer	RRSSA040-15	BOLD:AAB1098	pending	25-May-2015	Site 1 - Field Edge Forest	43.374	-80.354	332
Arthropoda	Insecta	Diptera	Culicidae	Culicinae	Aedes		Angela Telfer	RRSSA3750-15	BOLD:AAB1098	pending	27-May-2015	Site 1 - Field Edge Forest	43.374	-80.354	332
Arthropoda	Insecta	Diptera	Culicidae	Culicinae	Aedes		Angela Telfer	RRSSA3832-15	BOLD:AAB1098	pending	27-May-2015	Site 1 - Field Edge Forest	43.374	-80.354	332
Arthropoda	Insecta	Diptera	Culicidae	Culicinae	Aedes		Angela Telfer	RRSSA2058-15	BOLD:AAB1098	pending	29-May-2015	Site 1 - Field Edge Forest	43.374	-80.354	332
Arthropoda	Insecta	Diptera	Culicidae	Culicinae	Aedes		Angela Telfer	RRSSA1988-15	BOLD:AAB1098	pending	25-May-2015	Site 1 - Field Edge Forest	43.374	-80.354	332
Arthropoda	Insecta	Diptera	Culicidae	Culicinae	Aedes		Angela Telfer	RRSSA1997-15	BOLD:AAB1098	pending	25-May-2015	Site 1 - Field Edge Forest	43.374	-80.354	332
Arthropoda	Insecta	Diptera	Culicidae	Culicinae	Aedes		Angela Telfer	RRSSA3811-15	BOLD:AAB1098	pending	27-May-2015	Site 1 - Field Edge Forest	43.374	-80.354	332
Arthropoda	Insecta	Diptera	Culicidae	Culicinae	Aedes		Angela Telfer	RRSSA1983-15	BOLD:AAB1098	pending	25-May-2015	Site 1 - Field Edge Forest	43.374	-80.354	332
Arthropoda	Insecta	Diptera	Culicidae	Culicinae	Aedes		Angela Telfer	RRSSA407-15	BOLD:AAB1098	pending	29-May-2015	Site 1 - Field Edge Forest	43.374	-80.354	332
Arthropoda	Insecta	Diptera	Culicidae	Culicinae	Aedes		Angela Telfer	RRSSA3756-15	BOLD:AAB1098	pending	27-May-2015	Site 1 - Field Edge Forest	43.374	-80.354	332
Arthropoda	Insecta	Diptera	Culicidae	Culicinae	Aedes		Angela Telfer	RRSSA3743-15	BOLD:AAB1098	pending	27-May-2015	Site 1 - Field Edge Forest	43.374	-80.354	332
Arthropoda	Insecta	Diptera	Culicidae	Culicinae	Aedes		Angela Telfer	RRSSA041-15	BOLD:AAB1098	pending	25-May-2015	Site 1 - Field Edge Forest	43.374	-80.354	332
Arthropoda	Insecta	Diptera	Culicidae	Culicinae	Aedes		Angela Telfer	RRSSA2048-15	BOLD:AAB1098	pending	29-May-2015	Site 1 - Field Edge Forest	43.374	-80.354	332
Arthropoda	Insecta	Diptera	Culicidae	Culicinae	Aedes		Angela Telfer	RRSSA3749-15	BOLD:AAB1098	pending	27-May-2015	Site 1 - Field Edge Forest	43.374	-80.354	332
Arthropoda	Insecta	Diptera	Culicidae	Culicinae	Aedes		Angela Telfer	RRSSA3781-15	BOLD:AAB1098	pending	27-May-2015	Site 1 - Field Edge Forest	43.374	-80.354	332
Arthropoda	Insecta	Diptera	Culicidae	Culicinae	Aedes		Angela Telfer	RRSSA1002-15	BOLD:AAB1098	pending	31-May-2015	Site 1 - Field Edge Forest	43.374	-80.354	332
Arthropoda	Insecta	Diptera	Culicidae	Culicinae	Aedes		Angela Telfer	RRSSA3767-15	BOLD:AAB1098	pending	27-May-2015	Site 1 - Field Edge Forest	43.374	-80.354	332
Arthropoda	Insecta	Diptera	Culicidae	Culicinae	Aedes		Angela Telfer	RRMFD122-15	BOLD:AAB1098	pending	21-May-2015	Site 3 - South Field, forest edge	43.37	-80.364	312
Arthropoda	Insecta	Diptera	Culicidae	Culicinae	Aedes		Angela Telfer	RRSSA426-15	BOLD:AAB1098	pending	29-May-2015	Site 1 - Field Edge Forest	43.374	-80.354	332
Arthropoda	Insecta	Diptera	Culicidae	Culicinae	Aedes		Angela Telfer	RRMFE2790-15	BOLD:AAB1098	pending	27-May-2015	Site 3 - South Field, forest edge	43.3705	-80.3641	312
Arthropoda	Insecta	Diptera	Culicidae	Culicinae	Aedes		Angela Telfer	RRSSA3744-15	BOLD:AAB1098	pending	27-May-2015	Site 1 - Field Edge Forest	43.374	-80.354	332
Arthropoda	Insecta	Hymenoptera	Ichneumonidae	Orthocentrinae	Orthocentrus		Angela Telfer	RRMFE2797-15	BOLD:AAB1188	pending	27-May-2015	Site 3 - South Field, forest edge	43.3705	-80.3641	312
Arthropoda	Arachnida	Araneae	Dictynidae		Dictyna	Dictyna volucripes	Gergin A. Blagoev	RRSPI285-15	BOLD:AAB1638	pending	07-May-2015	Around the Site 2 and Site 3	43.37	-80.364	312
Arthropoda	Arachnida	Araneae	Dictynidae		Dictyna	Dictyna volucripes	Gergin A. Blagoev	RRSPI116-15	BOLD:AAB1638	pending	04-Jun-2015	Site 1 - Woodland Trail, alvar	43.379	-80.346	288
Arthropoda	Insecta	Hemiptera	Cercopidae		Philaenus	Philaenus spumarius quadrimaculatus	Jayme E. Sones	RRMFD292-15	BOLD:AAB1850	pending	21-May-2015	Site 3 - South Field, forest edge	43.37	-80.364	312
Arthropoda	Collembola	Entomobryomorpha	Isotomidae				Angela Telfer	RRBFA461-15	BOLD:AAB2085	pending	01-May-2015	Site 3 - South Field, forest edge	43.37	-80.364	312
Arthropoda	Collembola	Entomobryomorpha	Isotomidae				Angela Telfer	RRBFA457-15	BOLD:AAB2085	pending	01-May-2015	Site 3 - South Field, forest edge	43.37	-80.364	312
Arthropoda	Collembola	Entomobryomorpha	Isotomidae				Angela Telfer	RRBFA463-15	BOLD:AAB2085	pending	01-May-2015	Site 3 - South Field, forest edge	43.37	-80.364	312
Arthropoda	Collembola	Entomobryomorpha	Isotomidae				Angela Telfer	RRBFA465-15	BOLD:AAB2085	pending	01-May-2015	Site 3 - South Field, forest edge	43.37	-80.364	312
Arthropoda	Insecta	Hemiptera	Miridae	Mirinae			Angela Telfer	RRSSA1924-15	BOLD:AAB2216	pending	25-May-2015	Site 1 - Field Edge Forest	43.374	-80.354	332
Arthropoda	Insecta	Hemiptera	Miridae	Mirinae	Lygocoris	Lygocoris pabulinus	Angela Telfer	RRMFC745-15	BOLD:AAB2218	pending	14-May-2015	Site 3 - South Field, forest edge	43.37	-80.364	312
Arthropoda	Arachnida	Araneae	Dictynidae		Dictyna	Dictyna brevitarsa	Gergin A. Blagoev	RRSPI140-15	BOLD:AAB2306	pending	27-May-2015	Site 1 - Field Edge Forest	43.374	-80.354	332
Arthropoda	Insecta	Diptera	Syrphidae	Syrphinae	Eupeodes		Angela Telfer	RRMFC1696-15	BOLD:AAB2384	pending	14-May-2015	Site 3 - South Field, forest edge	43.37	-80.364	312
Arthropoda	Insecta	Diptera	Syrphidae	Syrphinae	Eupeodes		Angela Telfer	RRMFC1702-15	BOLD:AAB2384	pending	14-May-2015	Site 3 - South Field, forest edge	43.37	-80.364	312
Arthropoda	Insecta	Diptera	Syrphidae	Syrphinae	Eupeodes		Angela Telfer	RRMPC935-15	BOLD:AAB2384	pending	14-May-2015	Site 4 - Blair Flats, unburned prairie	43.385	-80.369	264
Arthropoda	Insecta	Diptera	Syrphidae	Syrphinae	Eupeodes		Angela Telfer	RRMPC940-15	BOLD:AAB2384	pending	14-May-2015	Site 4 - Blair Flats, unburned prairie	43.385	-80.369	264
Arthropoda	Insecta	Diptera	Syrphidae	Syrphinae	Eupeodes		Angela Telfer	RRMPD069-15	BOLD:AAB2384	pending	21-May-2015	Site 4 - Blair Flats, unburned prairie	43.385	-80.369	264
Arthropoda	Insecta	Diptera	Syrphidae	Syrphinae	Eupeodes		Angela Telfer	RRMFC2006-15	BOLD:AAB2384	pending	14-May-2015	Site 3 - South Field, forest edge	43.37	-80.364	312
Arthropoda	Insecta	Diptera	Syrphidae	Syrphinae	Eupeodes		Angela Telfer	RRMPB074-15	BOLD:AAB2384	pending	07-May-2015	Site 4 - Blair Flats, unburned prairie	43.385	-80.369	264
Arthropoda	Insecta	Diptera	Syrphidae	Syrphinae	Eupeodes		Angela Telfer	RRMPB075-15	BOLD:AAB2384	pending	07-May-2015	Site 4 - Blair Flats, unburned prairie	43.385	-80.369	264
Arthropoda	Insecta	Diptera	Syrphidae	Syrphinae	Eupeodes		Angela Telfer	RRMFC2012-15	BOLD:AAB2384	pending	14-May-2015	Site 3 - South Field, forest edge	43.37	-80.364	312
Arthropoda	Insecta	Diptera	Syrphidae	Syrphinae	Eupeodes		Angela Telfer	RRMPB080-15	BOLD:AAB2384	pending	07-May-2015	Site 4 - Blair Flats, unburned prairie	43.385	-80.369	264
Arthropoda	Insecta	Diptera	Syrphidae	Syrphinae	Eupeodes		Angela Telfer	RRMFB1094-15	BOLD:AAB2384	pending	07-May-2015	Site 3 - South Field, forest edge	43.37	-80.364	312
Arthropoda	Insecta	Diptera	Syrphidae	Syrphinae	Eupeodes		Angela Telfer	RRMPD071-15	BOLD:AAB2384	pending	21-May-2015	Site 4 - Blair Flats, unburned prairie	43.385	-80.369	264
Arthropoda	Insecta	Diptera	Syrphidae	Syrphinae	Eupeodes		Angela Telfer	RRMFC1698-15	BOLD:AAB2384	pending	14-May-2015	Site 3 - South Field, forest edge	43.37	-80.364	312
Arthropoda	Insecta	Diptera	Syrphidae	Syrphinae	Eupeodes		Angela Telfer	RRMPB079-15	BOLD:AAB2384	pending	07-May-2015	Site 4 - Blair Flats, unburned prairie	43.385	-80.369	264
Arthropoda	Insecta	Diptera	Syrphidae	Syrphinae	Eupeodes		Angela Telfer	RRMPB081-15	BOLD:AAB2384	pending	07-May-2015	Site 4 - Blair Flats, unburned prairie	43.385	-80.369	264
Arthropoda	Insecta	Diptera	Syrphidae	Syrphinae	Eupeodes		Angela Telfer	RRMPC943-15	BOLD:AAB2384	pending	14-May-2015	Site 4 - Blair Flats, unburned prairie	43.385	-80.369	264
Arthropoda	Insecta	Diptera	Syrphidae	Syrphinae	Eupeodes		Angela Telfer	RRMPD014-15	BOLD:AAB2384	pending	21-May-2015	Site 4 - Blair Flats, unburned prairie	43.385	-80.369	264
Arthropoda	Insecta	Diptera	Syrphidae	Syrphinae	Eupeodes		Angela Telfer	RRMFC1703-15	BOLD:AAB2384	pending	14-May-2015	Site 3 - South Field, forest edge	43.37	-80.364	312
Arthropoda	Insecta	Diptera	Syrphidae	Syrphinae	Eupeodes		Angela Telfer	RRMFC1700-15	BOLD:AAB2384	pending	14-May-2015	Site 3 - South Field, forest edge	43.37	-80.364	312
Arthropoda	Insecta	Diptera	Syrphidae	Syrphinae	Eupeodes		Angela Telfer	RRMPA005-15	BOLD:AAB2384	pending	29-Apr-2015	Site 4 - Blair Flats, unburned prairie	43.3854	-80.369	264
Arthropoda	Insecta	Diptera	Syrphidae	Syrphinae	Eupeodes		Angela Telfer	RRMFE2564-15	BOLD:AAB2384	pending	27-May-2015	Site 3 - South Field, forest edge	43.3705	-80.3641	312
Arthropoda	Insecta	Diptera	Syrphidae	Syrphinae	Eupeodes		Angela Telfer	RRMPB076-15	BOLD:AAB2384	pending	07-May-2015	Site 4 - Blair Flats, unburned prairie	43.385	-80.369	264
Arthropoda	Insecta	Diptera	Syrphidae	Syrphinae	Eupeodes		Angela Telfer	RRMPC938-15	BOLD:AAB2384	pending	14-May-2015	Site 4 - Blair Flats, unburned prairie	43.385	-80.369	264
Arthropoda	Insecta	Diptera	Syrphidae	Syrphinae	Eupeodes		Angela Telfer	RRMPD012-15	BOLD:AAB2384	pending	21-May-2015	Site 4 - Blair Flats, unburned prairie	43.385	-80.369	264
Arthropoda	Insecta	Diptera	Syrphidae	Syrphinae	Eupeodes		Angela Telfer	RRMPD011-15	BOLD:AAB2384	pending	21-May-2015	Site 4 - Blair Flats, unburned prairie	43.385	-80.369	264
Arthropoda	Insecta	Diptera	Syrphidae	Syrphinae	Eupeodes		Angela Telfer	RRMFB1095-15	BOLD:AAB2384	pending	07-May-2015	Site 3 - South Field, forest edge	43.37	-80.364	312
Arthropoda	Insecta	Diptera	Syrphidae	Syrphinae	Eupeodes		Angela Telfer	RRMPA003-15	BOLD:AAB2384	pending	29-Apr-2015	Site 4 - Blair Flats, unburned prairie	43.3854	-80.369	264
Arthropoda	Insecta	Diptera	Syrphidae	Syrphinae	Eupeodes		Angela Telfer	RRMFC2008-15	BOLD:AAB2384	pending	14-May-2015	Site 3 - South Field, forest edge	43.37	-80.364	312
Arthropoda	Insecta	Diptera	Syrphidae	Syrphinae	Eupeodes		Angela Telfer	RRMPA006-15	BOLD:AAB2384	pending	29-Apr-2015	Site 4 - Blair Flats, unburned prairie	43.3854	-80.369	264
Arthropoda	Insecta	Diptera	Syrphidae	Syrphinae	Eupeodes		Angela Telfer	RRMFC1697-15	BOLD:AAB2384	pending	14-May-2015	Site 3 - South Field, forest edge	43.37	-80.364	312
Arthropoda	Insecta	Diptera	Syrphidae	Syrphinae	Eupeodes		Angela Telfer	RRMPB071-15	BOLD:AAB2384	pending	07-May-2015	Site 4 - Blair Flats, unburned prairie	43.385	-80.369	264
Arthropoda	Insecta	Diptera	Syrphidae	Syrphinae	Eupeodes		Angela Telfer	RRMPC941-15	BOLD:AAB2384	pending	14-May-2015	Site 4 - Blair Flats, unburned prairie	43.385	-80.369	264
Arthropoda	Insecta	Diptera	Syrphidae	Syrphinae	Eupeodes		Angela Telfer	RRMPC936-15	BOLD:AAB2384	pending	14-May-2015	Site 4 - Blair Flats, unburned prairie	43.385	-80.369	264
Arthropoda	Insecta	Diptera	Syrphidae	Syrphinae	Eupeodes		Angela Telfer	RRMPC944-15	BOLD:AAB2384	pending	14-May-2015	Site 4 - Blair Flats, unburned prairie	43.385	-80.369	264
Arthropoda	Insecta	Diptera	Syrphidae	Syrphinae	Eupeodes		Angela Telfer	RRMPD073-15	BOLD:AAB2384	pending	21-May-2015	Site 4 - Blair Flats, unburned prairie	43.385	-80.369	264
Arthropoda	Insecta	Diptera	Syrphidae	Syrphinae	Eupeodes		Angela Telfer	RRMFB1096-15	BOLD:AAB2384	pending	07-May-2015	Site 3 - South Field, forest edge	43.37	-80.364	312
Arthropoda	Insecta	Diptera	Syrphidae	Syrphinae	Eupeodes		Angela Telfer	RRMPE348-15	BOLD:AAB2384	pending	27-May-2015	Site 4 - Blair Flats, unburned prairie	43.385	-80.369	264
Arthropoda	Insecta	Diptera	Syrphidae	Syrphinae	Eupeodes		Angela Telfer	RRMFE2565-15	BOLD:AAB2384	pending	27-May-2015	Site 3 - South Field, forest edge	43.3705	-80.3641	312
Arthropoda	Insecta	Diptera	Syrphidae	Syrphinae	Eupeodes		Angela Telfer	RRMPD072-15	BOLD:AAB2384	pending	21-May-2015	Site 4 - Blair Flats, unburned prairie	43.385	-80.369	264
Arthropoda	Insecta	Diptera	Syrphidae	Syrphinae	Eupeodes		Angela Telfer	RRMPD068-15	BOLD:AAB2384	pending	21-May-2015	Site 4 - Blair Flats, unburned prairie	43.385	-80.369	264
Arthropoda	Insecta	Diptera	Syrphidae	Syrphinae	Eupeodes		Angela Telfer	RRMPC933-15	BOLD:AAB2384	pending	14-May-2015	Site 4 - Blair Flats, unburned prairie	43.385	-80.369	264
Arthropoda	Insecta	Diptera	Syrphidae	Syrphinae	Eupeodes		Angela Telfer	RRMFE2563-15	BOLD:AAB2384	pending	27-May-2015	Site 3 - South Field, forest edge	43.3705	-80.3641	312
Arthropoda	Insecta	Diptera	Syrphidae	Syrphinae	Eupeodes		Angela Telfer	RRMFB1093-15	BOLD:AAB2384	pending	07-May-2015	Site 3 - South Field, forest edge	43.37	-80.364	312
Arthropoda	Insecta	Diptera	Syrphidae	Syrphinae	Eupeodes		Angela Telfer	RRMPB072-15	BOLD:AAB2384	pending	07-May-2015	Site 4 - Blair Flats, unburned prairie	43.385	-80.369	264
Arthropoda	Insecta	Diptera	Syrphidae	Syrphinae	Eupeodes		Angela Telfer	RRMPD070-15	BOLD:AAB2384	pending	21-May-2015	Site 4 - Blair Flats, unburned prairie	43.385	-80.369	264
Arthropoda	Insecta	Diptera	Syrphidae	Syrphinae	Eupeodes		Angela Telfer	RRMFC2007-15	BOLD:AAB2384	pending	14-May-2015	Site 3 - South Field, forest edge	43.37	-80.364	312
Arthropoda	Insecta	Diptera	Syrphidae	Syrphinae	Eupeodes		Angela Telfer	RRMPC937-15	BOLD:AAB2384	pending	14-May-2015	Site 4 - Blair Flats, unburned prairie	43.385	-80.369	264
Arthropoda	Insecta	Diptera	Syrphidae	Syrphinae	Eupeodes		Angela Telfer	RRMPB077-15	BOLD:AAB2384	pending	07-May-2015	Site 4 - Blair Flats, unburned prairie	43.385	-80.369	264
Arthropoda	Insecta	Diptera	Syrphidae	Syrphinae	Eupeodes		Angela Telfer	RRMPC942-15	BOLD:AAB2384	pending	14-May-2015	Site 4 - Blair Flats, unburned prairie	43.385	-80.369	264
Arthropoda	Insecta	Diptera	Syrphidae	Syrphinae	Eupeodes		Angela Telfer	RRMPC934-15	BOLD:AAB2384	pending	14-May-2015	Site 4 - Blair Flats, unburned prairie	43.385	-80.369	264
Arthropoda	Insecta	Diptera	Syrphidae	Syrphinae	Eupeodes		Angela Telfer	RRMPB073-15	BOLD:AAB2384	pending	07-May-2015	Site 4 - Blair Flats, unburned prairie	43.385	-80.369	264
Arthropoda	Insecta	Diptera	Syrphidae	Syrphinae	Eupeodes		Angela Telfer	RRMFC2011-15	BOLD:AAB2384	pending	14-May-2015	Site 3 - South Field, forest edge	43.37	-80.364	312
Arthropoda	Insecta	Diptera	Syrphidae	Syrphinae	Eupeodes		Angela Telfer	RRMPB082-15	BOLD:AAB2384	pending	07-May-2015	Site 4 - Blair Flats, unburned prairie	43.385	-80.369	264
Arthropoda	Insecta	Diptera	Syrphidae	Syrphinae	Eupeodes		Angela Telfer	RRMPB070-15	BOLD:AAB2384	pending	07-May-2015	Site 4 - Blair Flats, unburned prairie	43.385	-80.369	264
Arthropoda	Insecta	Diptera	Syrphidae	Syrphinae	Eupeodes		Angela Telfer	RRMPC939-15	BOLD:AAB2384	pending	14-May-2015	Site 4 - Blair Flats, unburned prairie	43.385	-80.369	264
Arthropoda	Insecta	Diptera	Syrphidae	Syrphinae	Eupeodes		Angela Telfer	RRMFC1701-15	BOLD:AAB2384	pending	14-May-2015	Site 3 - South Field, forest edge	43.37	-80.364	312
Arthropoda	Insecta	Diptera	Syrphidae	Syrphinae	Eupeodes		Angela Telfer	RRMFC1699-15	BOLD:AAB2384	pending	14-May-2015	Site 3 - South Field, forest edge	43.37	-80.364	312
Arthropoda	Insecta	Diptera	Syrphidae	Syrphinae	Eupeodes		Angela Telfer	RRMPA004-15	BOLD:AAB2384	pending	29-Apr-2015	Site 4 - Blair Flats, unburned prairie	43.3854	-80.369	264
Arthropoda	Insecta	Diptera	Syrphidae	Syrphinae	Eupeodes		Angela Telfer	RRMFE2561-15	BOLD:AAB2384	pending	27-May-2015	Site 3 - South Field, forest edge	43.3705	-80.3641	312
Arthropoda	Insecta	Diptera	Syrphidae	Syrphinae	Eupeodes		Angela Telfer	RRMPB078-15	BOLD:AAB2384	pending	07-May-2015	Site 4 - Blair Flats, unburned prairie	43.385	-80.369	264
Arthropoda	Insecta	Diptera	Syrphidae	Syrphinae	Eupeodes		Angela Telfer	RRMPA002-15	BOLD:AAB2384	pending	29-Apr-2015	Site 4 - Blair Flats, unburned prairie	43.3854	-80.369	264
Arthropoda	Arachnida	Pseudoscorpiones	Neobisiidae		Microbisium		Angela Telfer	RRBAA231-15	BOLD:AAB2506	pending	01-May-2015	Site 1 - Woodland Trail, alvar	43.379	-80.346	288
Arthropoda	Arachnida	Pseudoscorpiones	Neobisiidae		Microbisium		Angela Telfer	RRBFA432-15	BOLD:AAB2508	pending	01-May-2015	Site 3 - South Field, forest edge	43.37	-80.364	312
Arthropoda	Insecta	Diptera	Culicidae	Culicinae	Coquillettidia	Coquillettidia perturbans	Angela Telfer	RRMFG2873-15	BOLD:AAB2539	pending	11-Jun-2015	Site 3 - South Field, forest edge	43.37	-80.364	312
Arthropoda	Insecta	Diptera	Culicidae	Culicinae	Coquillettidia	Coquillettidia perturbans	Angela Telfer	RRMFG2874-15	BOLD:AAB2539	pending	11-Jun-2015	Site 3 - South Field, forest edge	43.37	-80.364	312
Arthropoda	Insecta	Diptera	Culicidae	Culicinae	Coquillettidia	Coquillettidia perturbans	Angela Telfer	RRMFG2872-15	BOLD:AAB2539	pending	11-Jun-2015	Site 3 - South Field, forest edge	43.37	-80.364	312
Arthropoda	Insecta	Diptera	Culicidae	Culicinae	Coquillettidia	Coquillettidia perturbans	Angela Telfer	RRMFG2878-15	BOLD:AAB2539	pending	11-Jun-2015	Site 3 - South Field, forest edge	43.37	-80.364	312
Arthropoda	Insecta	Diptera	Chironomidae	Orthocladiinae	Orthocladius	Orthocladius dorenus	Angela Telfer	RRMPB602-15	BOLD:AAB2641	pending	07-May-2015	Site 4 - Blair Flats, unburned prairie	43.385	-80.369	264
Arthropoda	Insecta	Diptera	Chironomidae	Orthocladiinae	Orthocladius	Orthocladius dorenus	Angela Telfer	RRMFB363-15	BOLD:AAB2641	pending	07-May-2015	Site 3 - South Field, forest edge	43.3705	-80.3641	312
Arthropoda	Insecta	Diptera	Chironomidae	Orthocladiinae	Orthocladius	Orthocladius dorenus	Angela Telfer	RRMPB359-15	BOLD:AAB2641	pending	07-May-2015	Site 4 - Blair Flats, unburned prairie	43.385	-80.369	264
Arthropoda	Insecta	Diptera	Chironomidae	Orthocladiinae	Orthocladius		Angela Telfer	RRMFA016-15	BOLD:AAB2644	pending	29-Apr-2015	Site 3 - South Field, forest edge	43.3705	-80.3641	312
Arthropoda	Insecta	Diptera	Chironomidae	Orthocladiinae	Orthocladius		Angela Telfer	RRMPA733-15	BOLD:AAB2644	pending	29-Apr-2015	Site 4 - Blair Flats, unburned prairie	43.3854	-80.369	264
Arthropoda	Insecta	Diptera	Chironomidae	Orthocladiinae	Orthocladius		Angela Telfer	RRMPA229-15	BOLD:AAB2644	pending	29-Apr-2015	Site 4 - Blair Flats, unburned prairie	43.3854	-80.369	264
Arthropoda	Insecta	Diptera	Chironomidae	Orthocladiinae	Orthocladius		Angela Telfer	RRMPC328-15	BOLD:AAB2644	pending	14-May-2015	Site 4 - Blair Flats, unburned prairie	43.385	-80.369	264
Arthropoda	Insecta	Diptera	Chironomidae	Orthocladiinae	Orthocladius		Angela Telfer	RRMPC274-15	BOLD:AAB2644	pending	14-May-2015	Site 4 - Blair Flats, unburned prairie	43.385	-80.369	264
Arthropoda	Insecta	Diptera	Chironomidae	Orthocladiinae	Orthocladius		Angela Telfer	RRMPC568-15	BOLD:AAB2644	pending	14-May-2015	Site 4 - Blair Flats, unburned prairie	43.385	-80.369	264
Arthropoda	Insecta	Diptera	Chironomidae	Orthocladiinae	Orthocladius		Angela Telfer	RRMPA214-15	BOLD:AAB2644	pending	29-Apr-2015	Site 4 - Blair Flats, unburned prairie	43.3854	-80.369	264
Arthropoda	Insecta	Diptera	Chironomidae	Orthocladiinae	Orthocladius		Angela Telfer	RRMPC752-15	BOLD:AAB2644	pending	14-May-2015	Site 4 - Blair Flats, unburned prairie	43.385	-80.369	264
Arthropoda	Insecta	Diptera	Chironomidae	Orthocladiinae	Orthocladius		Angela Telfer	RRMPA851-15	BOLD:AAB2644	pending	29-Apr-2015	Site 4 - Blair Flats, unburned prairie	43.3854	-80.369	264
Arthropoda	Insecta	Diptera	Chironomidae	Orthocladiinae	Orthocladius		Angela Telfer	RRMPD518-15	BOLD:AAB2644	pending	21-May-2015	Site 4 - Blair Flats, unburned prairie	43.385	-80.369	264
Arthropoda	Insecta	Diptera	Chironomidae	Orthocladiinae	Orthocladius		Angela Telfer	RRMFA084-15	BOLD:AAB2644	pending	29-Apr-2015	Site 3 - South Field, forest edge	43.3705	-80.3641	312
Arthropoda	Insecta	Diptera	Chironomidae	Orthocladiinae	Orthocladius		Angela Telfer	RRMPE185-15	BOLD:AAB2644	pending	27-May-2015	Site 4 - Blair Flats, unburned prairie	43.385	-80.369	264
Arthropoda	Insecta	Diptera	Chironomidae	Orthocladiinae	Orthocladius		Angela Telfer	RRMFD618-15	BOLD:AAB2644	pending	21-May-2015	Site 3 - South Field, forest edge	43.37	-80.364	312
Arthropoda	Insecta	Diptera	Chironomidae	Orthocladiinae	Orthocladius		Angela Telfer	RRMFA037-15	BOLD:AAB2644	pending	29-Apr-2015	Site 3 - South Field, forest edge	43.3705	-80.3641	312
Arthropoda	Insecta	Diptera	Chironomidae	Orthocladiinae	Orthocladius		Angela Telfer	RRMPC468-15	BOLD:AAB2644	pending	14-May-2015	Site 4 - Blair Flats, unburned prairie	43.385	-80.369	264
Arthropoda	Insecta	Diptera	Chironomidae	Orthocladiinae	Orthocladius		Angela Telfer	RRMPC230-15	BOLD:AAB2644	pending	14-May-2015	Site 4 - Blair Flats, unburned prairie	43.385	-80.369	264
Arthropoda	Insecta	Diptera	Chironomidae	Orthocladiinae	Orthocladius		Angela Telfer	RRMPA835-15	BOLD:AAB2644	pending	29-Apr-2015	Site 4 - Blair Flats, unburned prairie	43.3854	-80.369	264
Arthropoda	Insecta	Diptera	Chironomidae	Orthocladiinae	Orthocladius		Angela Telfer	RRMPB4144-15	BOLD:AAB2644	pending	07-May-2015	Site 4 - Blair Flats, unburned prairie	43.385	-80.369	264
Arthropoda	Insecta	Diptera	Chironomidae	Orthocladiinae	Orthocladius		Angela Telfer	RRMPA683-15	BOLD:AAB2644	pending	29-Apr-2015	Site 4 - Blair Flats, unburned prairie	43.3854	-80.369	264
Arthropoda	Insecta	Diptera	Chironomidae	Orthocladiinae	Orthocladius		Angela Telfer	RRMPB326-15	BOLD:AAB2644	pending	07-May-2015	Site 4 - Blair Flats, unburned prairie	43.385	-80.369	264
Arthropoda	Insecta	Diptera	Chironomidae	Orthocladiinae	Orthocladius		Angela Telfer	RRMPE224-15	BOLD:AAB2644	pending	27-May-2015	Site 4 - Blair Flats, unburned prairie	43.385	-80.369	264
Arthropoda	Insecta	Diptera	Chironomidae	Orthocladiinae	Orthocladius		Angela Telfer	RRMPB2639-15	BOLD:AAB2644	pending	07-May-2015	Site 4 - Blair Flats, unburned prairie	43.385	-80.369	264
Arthropoda	Insecta	Diptera	Chironomidae	Orthocladiinae	Orthocladius		Angela Telfer	RRMFD1049-15	BOLD:AAB2644	pending	21-May-2015	Site 3 - South Field, forest edge	43.37	-80.364	312
Arthropoda	Insecta	Diptera	Chironomidae	Orthocladiinae	Orthocladius		Angela Telfer	RRMPC695-15	BOLD:AAB2644	pending	14-May-2015	Site 4 - Blair Flats, unburned prairie	43.385	-80.369	264
Arthropoda	Insecta	Diptera	Chironomidae	Orthocladiinae	Orthocladius		Angela Telfer	RRMPA827-15	BOLD:AAB2644	pending	29-Apr-2015	Site 4 - Blair Flats, unburned prairie	43.3854	-80.369	264
Arthropoda	Insecta	Diptera	Chironomidae	Orthocladiinae	Orthocladius		Angela Telfer	RRMPA215-15	BOLD:AAB2644	pending	29-Apr-2015	Site 4 - Blair Flats, unburned prairie	43.3854	-80.369	264
Arthropoda	Insecta	Diptera	Chironomidae	Orthocladiinae	Orthocladius		Angela Telfer	RRMPA525-15	BOLD:AAB2644	pending	29-Apr-2015	Site 4 - Blair Flats, unburned prairie	43.3854	-80.369	264
Arthropoda	Insecta	Diptera	Chironomidae	Orthocladiinae	Orthocladius		Angela Telfer	RRMFA148-15	BOLD:AAB2644	pending	29-Apr-2015	Site 3 - South Field, forest edge	43.3705	-80.3641	312
Arthropoda	Insecta	Diptera	Chironomidae	Orthocladiinae	Orthocladius		Angela Telfer	RRMPC404-15	BOLD:AAB2644	pending	14-May-2015	Site 4 - Blair Flats, unburned prairie	43.385	-80.369	264
Arthropoda	Insecta	Diptera	Chironomidae	Orthocladiinae	Orthocladius		Angela Telfer	RRMPC250-15	BOLD:AAB2644	pending	14-May-2015	Site 4 - Blair Flats, unburned prairie	43.385	-80.369	264
Arthropoda	Insecta	Diptera	Chironomidae	Orthocladiinae	Orthocladius		Angela Telfer	RRMPB1384-15	BOLD:AAB2644	pending	07-May-2015	Site 4 - Blair Flats, unburned prairie	43.385	-80.369	264
Arthropoda	Insecta	Diptera	Chironomidae	Orthocladiinae	Orthocladius		Angela Telfer	RRMFC1255-15	BOLD:AAB2644	pending	14-May-2015	Site 3 - South Field, forest edge	43.37	-80.364	312
Arthropoda	Insecta	Diptera	Chironomidae	Orthocladiinae	Orthocladius		Angela Telfer	RRMPA212-15	BOLD:AAB2644	pending	29-Apr-2015	Site 4 - Blair Flats, unburned prairie	43.3854	-80.369	264
Arthropoda	Insecta	Diptera	Chironomidae	Orthocladiinae	Orthocladius		Angela Telfer	RRMPC396-15	BOLD:AAB2644	pending	14-May-2015	Site 4 - Blair Flats, unburned prairie	43.385	-80.369	264
Arthropoda	Insecta	Diptera	Chironomidae	Orthocladiinae	Orthocladius		Angela Telfer	RRMPC632-15	BOLD:AAB2644	pending	14-May-2015	Site 4 - Blair Flats, unburned prairie	43.385	-80.369	264
Arthropoda	Insecta	Diptera	Chironomidae	Orthocladiinae	Orthocladius		Angela Telfer	RRMPA522-15	BOLD:AAB2644	pending	29-Apr-2015	Site 4 - Blair Flats, unburned prairie	43.3854	-80.369	264
Arthropoda	Insecta	Diptera	Chironomidae	Orthocladiinae	Orthocladius		Angela Telfer	RRMPE273-15	BOLD:AAB2644	pending	27-May-2015	Site 4 - Blair Flats, unburned prairie	43.385	-80.369	264
Arthropoda	Insecta	Diptera	Chironomidae	Orthocladiinae	Orthocladius		Angela Telfer	RRMFD734-15	BOLD:AAB2644	pending	21-May-2015	Site 3 - South Field, forest edge	43.37	-80.364	312
Arthropoda	Insecta	Diptera	Chironomidae	Orthocladiinae	Orthocladius		Angela Telfer	RRMPC700-15	BOLD:AAB2644	pending	14-May-2015	Site 4 - Blair Flats, unburned prairie	43.385	-80.369	264
Arthropoda	Insecta	Diptera	Chironomidae	Orthocladiinae	Orthocladius		Angela Telfer	RRMPA041-15	BOLD:AAB2644	pending	29-Apr-2015	Site 4 - Blair Flats, unburned prairie	43.3854	-80.369	264
Arthropoda	Insecta	Diptera	Chironomidae	Orthocladiinae	Orthocladius		Angela Telfer	RRMPE082-15	BOLD:AAB2644	pending	27-May-2015	Site 4 - Blair Flats, unburned prairie	43.385	-80.369	264
Arthropoda	Insecta	Diptera	Chironomidae	Orthocladiinae	Orthocladius		Angela Telfer	RRMFA167-15	BOLD:AAB2644	pending	29-Apr-2015	Site 3 - South Field, forest edge	43.3705	-80.3641	312
Arthropoda	Insecta	Diptera	Chironomidae	Orthocladiinae	Orthocladius		Angela Telfer	RRMPC242-15	BOLD:AAB2644	pending	14-May-2015	Site 4 - Blair Flats, unburned prairie	43.385	-80.369	264
Arthropoda	Insecta	Diptera	Chironomidae	Orthocladiinae	Orthocladius		Angela Telfer	RRMPA294-15	BOLD:AAB2644	pending	29-Apr-2015	Site 4 - Blair Flats, unburned prairie	43.3854	-80.369	264
Arthropoda	Insecta	Diptera	Chironomidae	Orthocladiinae	Orthocladius		Angela Telfer	RRMPA783-15	BOLD:AAB2644	pending	29-Apr-2015	Site 4 - Blair Flats, unburned prairie	43.3854	-80.369	264
Arthropoda	Insecta	Diptera	Chironomidae	Orthocladiinae	Orthocladius		Angela Telfer	RRMPC640-15	BOLD:AAB2644	pending	14-May-2015	Site 4 - Blair Flats, unburned prairie	43.385	-80.369	264
Arthropoda	Insecta	Diptera	Chironomidae	Orthocladiinae	Orthocladius		Angela Telfer	RRMPC164-15	BOLD:AAB2644	pending	14-May-2015	Site 4 - Blair Flats, unburned prairie	43.385	-80.369	264
Arthropoda	Insecta	Diptera	Chironomidae	Orthocladiinae	Orthocladius		Angela Telfer	RRMPA536-15	BOLD:AAB2644	pending	29-Apr-2015	Site 4 - Blair Flats, unburned prairie	43.3854	-80.369	264
Arthropoda	Insecta	Diptera	Chironomidae	Orthocladiinae	Orthocladius		Angela Telfer	RRMPC1110-15	BOLD:AAB2644	pending	14-May-2015	Site 4 - Blair Flats, unburned prairie	43.385	-80.369	264
Arthropoda	Insecta	Diptera	Chironomidae	Orthocladiinae	Orthocladius		Angela Telfer	RRMPC652-15	BOLD:AAB2644	pending	14-May-2015	Site 4 - Blair Flats, unburned prairie	43.385	-80.369	264
Arthropoda	Insecta	Diptera	Chironomidae	Orthocladiinae	Orthocladius		Angela Telfer	RRMPA060-15	BOLD:AAB2644	pending	29-Apr-2015	Site 4 - Blair Flats, unburned prairie	43.3854	-80.369	264
Arthropoda	Insecta	Diptera	Chironomidae	Orthocladiinae	Orthocladius		Angela Telfer	RRMPA287-15	BOLD:AAB2644	pending	29-Apr-2015	Site 4 - Blair Flats, unburned prairie	43.3854	-80.369	264
Arthropoda	Insecta	Diptera	Chironomidae	Orthocladiinae	Orthocladius		Angela Telfer	RRMPA373-15	BOLD:AAB2644	pending	29-Apr-2015	Site 4 - Blair Flats, unburned prairie	43.3854	-80.369	264
Arthropoda	Insecta	Diptera	Chironomidae	Orthocladiinae	Orthocladius		Angela Telfer	RRMPA837-15	BOLD:AAB2644	pending	29-Apr-2015	Site 4 - Blair Flats, unburned prairie	43.3854	-80.369	264
Arthropoda	Insecta	Diptera	Chironomidae	Orthocladiinae	Orthocladius		Angela Telfer	RRMPC028-15	BOLD:AAB2644	pending	14-May-2015	Site 4 - Blair Flats, unburned prairie	43.385	-80.369	264
Arthropoda	Insecta	Diptera	Chironomidae	Orthocladiinae	Orthocladius		Angela Telfer	RRMFD581-15	BOLD:AAB2644	pending	21-May-2015	Site 3 - South Field, forest edge	43.37	-80.364	312
Arthropoda	Insecta	Diptera	Chironomidae	Orthocladiinae	Orthocladius		Angela Telfer	RRMPD394-15	BOLD:AAB2644	pending	21-May-2015	Site 4 - Blair Flats, unburned prairie	43.385	-80.369	264
Arthropoda	Insecta	Diptera	Chironomidae	Orthocladiinae	Orthocladius		Angela Telfer	RRMFA049-15	BOLD:AAB2644	pending	29-Apr-2015	Site 3 - South Field, forest edge	43.3705	-80.3641	312
Arthropoda	Insecta	Diptera	Chironomidae	Orthocladiinae	Orthocladius		Angela Telfer	RRMPA556-15	BOLD:AAB2644	pending	29-Apr-2015	Site 4 - Blair Flats, unburned prairie	43.3854	-80.369	264
Arthropoda	Insecta	Diptera	Chironomidae	Orthocladiinae	Orthocladius		Angela Telfer	RRMPA819-15	BOLD:AAB2644	pending	29-Apr-2015	Site 4 - Blair Flats, unburned prairie	43.3854	-80.369	264
Arthropoda	Insecta	Diptera	Chironomidae	Orthocladiinae	Orthocladius		Angela Telfer	RRMPA848-15	BOLD:AAB2644	pending	29-Apr-2015	Site 4 - Blair Flats, unburned prairie	43.3854	-80.369	264
Arthropoda	Insecta	Diptera	Chironomidae	Orthocladiinae	Orthocladius		Angela Telfer	RRMFC1626-15	BOLD:AAB2644	pending	14-May-2015	Site 3 - South Field, forest edge	43.37	-80.364	312
Arthropoda	Insecta	Diptera	Chironomidae	Orthocladiinae	Orthocladius		Angela Telfer	RRMFD376-15	BOLD:AAB2644	pending	21-May-2015	Site 3 - South Field, forest edge	43.37	-80.364	312
Arthropoda	Insecta	Diptera	Chironomidae	Orthocladiinae	Orthocladius		Angela Telfer	RRMPD537-15	BOLD:AAB2644	pending	21-May-2015	Site 4 - Blair Flats, unburned prairie	43.385	-80.369	264
Arthropoda	Insecta	Diptera	Chironomidae	Orthocladiinae	Orthocladius		Angela Telfer	RRMPA236-15	BOLD:AAB2644	pending	29-Apr-2015	Site 4 - Blair Flats, unburned prairie	43.3854	-80.369	264
Arthropoda	Insecta	Diptera	Chironomidae	Orthocladiinae	Orthocladius		Angela Telfer	RRMPC319-15	BOLD:AAB2644	pending	14-May-2015	Site 4 - Blair Flats, unburned prairie	43.385	-80.369	264
Arthropoda	Insecta	Diptera	Chironomidae	Orthocladiinae	Orthocladius		Angela Telfer	RRMPA055-15	BOLD:AAB2644	pending	29-Apr-2015	Site 4 - Blair Flats, unburned prairie	43.3854	-80.369	264
Arthropoda	Insecta	Diptera	Chironomidae	Orthocladiinae	Orthocladius		Angela Telfer	RRMFD643-15	BOLD:AAB2644	pending	21-May-2015	Site 3 - South Field, forest edge	43.37	-80.364	312
Arthropoda	Insecta	Diptera	Chironomidae	Orthocladiinae	Orthocladius		Angela Telfer	RRMPA053-15	BOLD:AAB2644	pending	29-Apr-2015	Site 4 - Blair Flats, unburned prairie	43.3854	-80.369	264
Arthropoda	Insecta	Diptera	Chironomidae	Orthocladiinae	Orthocladius		Angela Telfer	RRMFC1500-15	BOLD:AAB2644	pending	14-May-2015	Site 3 - South Field, forest edge	43.37	-80.364	312
Arthropoda	Insecta	Diptera	Chironomidae	Orthocladiinae	Orthocladius		Angela Telfer	RRMPD133-15	BOLD:AAB2644	pending	21-May-2015	Site 4 - Blair Flats, unburned prairie	43.385	-80.369	264
Arthropoda	Insecta	Diptera	Chironomidae	Orthocladiinae	Orthocladius		Angela Telfer	RRMFD601-15	BOLD:AAB2644	pending	21-May-2015	Site 3 - South Field, forest edge	43.37	-80.364	312
Arthropoda	Insecta	Diptera	Chironomidae	Orthocladiinae	Orthocladius		Angela Telfer	RRMPC244-15	BOLD:AAB2644	pending	14-May-2015	Site 4 - Blair Flats, unburned prairie	43.385	-80.369	264
Arthropoda	Insecta	Diptera	Chironomidae	Orthocladiinae	Orthocladius		Angela Telfer	RRMPA209-15	BOLD:AAB2644	pending	29-Apr-2015	Site 4 - Blair Flats, unburned prairie	43.3854	-80.369	264
Arthropoda	Insecta	Diptera	Chironomidae	Orthocladiinae	Orthocladius		Angela Telfer	RRMPA579-15	BOLD:AAB2644	pending	29-Apr-2015	Site 4 - Blair Flats, unburned prairie	43.3854	-80.369	264
Arthropoda	Insecta	Diptera	Chironomidae	Orthocladiinae	Orthocladius		Angela Telfer	RRMPC541-15	BOLD:AAB2644	pending	14-May-2015	Site 4 - Blair Flats, unburned prairie	43.385	-80.369	264
Arthropoda	Insecta	Diptera	Chironomidae	Orthocladiinae	Orthocladius		Angela Telfer	RRMFA067-15	BOLD:AAB2644	pending	29-Apr-2015	Site 3 - South Field, forest edge	43.3705	-80.3641	312
Arthropoda	Insecta	Diptera	Chironomidae	Orthocladiinae	Orthocladius		Angela Telfer	RRMPA605-15	BOLD:AAB2644	pending	29-Apr-2015	Site 4 - Blair Flats, unburned prairie	43.3854	-80.369	264
Arthropoda	Insecta	Diptera	Chironomidae	Orthocladiinae	Orthocladius		Angela Telfer	RRMPD413-15	BOLD:AAB2644	pending	21-May-2015	Site 4 - Blair Flats, unburned prairie	43.385	-80.369	264
Arthropoda	Insecta	Diptera	Chironomidae	Orthocladiinae	Orthocladius		Angela Telfer	RRMPA167-15	BOLD:AAB2644	pending	29-Apr-2015	Site 4 - Blair Flats, unburned prairie	43.3854	-80.369	264
Arthropoda	Insecta	Diptera	Chironomidae	Orthocladiinae	Orthocladius		Angela Telfer	RRMPC104-15	BOLD:AAB2644	pending	14-May-2015	Site 4 - Blair Flats, unburned prairie	43.385	-80.369	264
Arthropoda	Insecta	Diptera	Chironomidae	Orthocladiinae	Orthocladius		Angela Telfer	RRMFC1168-15	BOLD:AAB2644	pending	14-May-2015	Site 3 - South Field, forest edge	43.37	-80.364	312
Arthropoda	Insecta	Diptera	Chironomidae	Orthocladiinae	Orthocladius		Angela Telfer	RRMPD167-15	BOLD:AAB2644	pending	21-May-2015	Site 4 - Blair Flats, unburned prairie	43.385	-80.369	264
Arthropoda	Insecta	Diptera	Chironomidae	Orthocladiinae	Orthocladius		Angela Telfer	RRMFB325-15	BOLD:AAB2644	pending	07-May-2015	Site 3 - South Field, forest edge	43.3705	-80.3641	312
Arthropoda	Insecta	Diptera	Chironomidae	Orthocladiinae	Orthocladius		Angela Telfer	RRMPA416-15	BOLD:AAB2644	pending	29-Apr-2015	Site 4 - Blair Flats, unburned prairie	43.3854	-80.369	264
Arthropoda	Insecta	Diptera	Chironomidae	Orthocladiinae	Orthocladius		Angela Telfer	RRMPA745-15	BOLD:AAB2644	pending	29-Apr-2015	Site 4 - Blair Flats, unburned prairie	43.3854	-80.369	264
Arthropoda	Insecta	Diptera	Chironomidae	Orthocladiinae	Orthocladius		Angela Telfer	RRMPB2884-15	BOLD:AAB2644	pending	07-May-2015	Site 4 - Blair Flats, unburned prairie	43.385	-80.369	264
Arthropoda	Insecta	Diptera	Chironomidae	Orthocladiinae	Orthocladius		Angela Telfer	RRMPA317-15	BOLD:AAB2644	pending	29-Apr-2015	Site 4 - Blair Flats, unburned prairie	43.3854	-80.369	264
Arthropoda	Insecta	Diptera	Chironomidae	Orthocladiinae	Orthocladius		Angela Telfer	RRMPC564-15	BOLD:AAB2644	pending	14-May-2015	Site 4 - Blair Flats, unburned prairie	43.385	-80.369	264
Arthropoda	Insecta	Diptera	Chironomidae	Orthocladiinae	Orthocladius		Angela Telfer	RRMPC403-15	BOLD:AAB2644	pending	14-May-2015	Site 4 - Blair Flats, unburned prairie	43.385	-80.369	264
Arthropoda	Insecta	Diptera	Chironomidae	Orthocladiinae	Orthocladius		Angela Telfer	RRMFA136-15	BOLD:AAB2644	pending	29-Apr-2015	Site 3 - South Field, forest edge	43.3705	-80.3641	312
Arthropoda	Insecta	Diptera	Chironomidae	Orthocladiinae	Orthocladius		Angela Telfer	RRMPA260-15	BOLD:AAB2644	pending	29-Apr-2015	Site 4 - Blair Flats, unburned prairie	43.3854	-80.369	264
Arthropoda	Insecta	Diptera	Chironomidae	Orthocladiinae	Orthocladius		Angela Telfer	RRMPC647-15	BOLD:AAB2644	pending	14-May-2015	Site 4 - Blair Flats, unburned prairie	43.385	-80.369	264
Arthropoda	Insecta	Diptera	Chironomidae	Orthocladiinae	Orthocladius		Angela Telfer	RRMFA170-15	BOLD:AAB2644	pending	29-Apr-2015	Site 3 - South Field, forest edge	43.3705	-80.3641	312
Arthropoda	Insecta	Diptera	Chironomidae	Orthocladiinae	Orthocladius		Angela Telfer	RRMPA285-15	BOLD:AAB2644	pending	29-Apr-2015	Site 4 - Blair Flats, unburned prairie	43.3854	-80.369	264
Arthropoda	Insecta	Diptera	Chironomidae	Orthocladiinae	Orthocladius		Angela Telfer	RRMFA185-15	BOLD:AAB2644	pending	29-Apr-2015	Site 3 - South Field, forest edge	43.3705	-80.3641	312
Arthropoda	Insecta	Diptera	Chironomidae	Orthocladiinae	Orthocladius		Angela Telfer	RRMPC109-15	BOLD:AAB2644	pending	14-May-2015	Site 4 - Blair Flats, unburned prairie	43.385	-80.369	264
Arthropoda	Insecta	Diptera	Chironomidae	Orthocladiinae	Orthocladius		Angela Telfer	RRMPC393-15	BOLD:AAB2644	pending	14-May-2015	Site 4 - Blair Flats, unburned prairie	43.385	-80.369	264
Arthropoda	Insecta	Diptera	Chironomidae	Orthocladiinae	Orthocladius		Angela Telfer	RRMPA079-15	BOLD:AAB2644	pending	29-Apr-2015	Site 4 - Blair Flats, unburned prairie	43.3854	-80.369	264
Arthropoda	Insecta	Diptera	Chironomidae	Orthocladiinae	Orthocladius		Angela Telfer	RRMPC1057-15	BOLD:AAB2644	pending	14-May-2015	Site 4 - Blair Flats, unburned prairie	43.385	-80.369	264
Arthropoda	Insecta	Diptera	Chironomidae	Orthocladiinae	Orthocladius		Angela Telfer	RRMPC608-15	BOLD:AAB2644	pending	14-May-2015	Site 4 - Blair Flats, unburned prairie	43.385	-80.369	264
Arthropoda	Insecta	Diptera	Chironomidae	Orthocladiinae	Orthocladius		Angela Telfer	RRMPD089-15	BOLD:AAB2644	pending	21-May-2015	Site 4 - Blair Flats, unburned prairie	43.385	-80.369	264
Arthropoda	Insecta	Diptera	Chironomidae	Orthocladiinae	Orthocladius		Angela Telfer	RRMPA390-15	BOLD:AAB2644	pending	29-Apr-2015	Site 4 - Blair Flats, unburned prairie	43.3854	-80.369	264
Arthropoda	Insecta	Diptera	Chironomidae	Orthocladiinae	Orthocladius		Angela Telfer	RRMPD409-15	BOLD:AAB2644	pending	21-May-2015	Site 4 - Blair Flats, unburned prairie	43.385	-80.369	264
Arthropoda	Insecta	Diptera	Chironomidae	Orthocladiinae	Orthocladius		Angela Telfer	RRMFD1172-15	BOLD:AAB2644	pending	21-May-2015	Site 3 - South Field, forest edge	43.37	-80.364	312
Arthropoda	Insecta	Diptera	Chironomidae	Orthocladiinae	Orthocladius		Angela Telfer	RRMPA669-15	BOLD:AAB2644	pending	29-Apr-2015	Site 4 - Blair Flats, unburned prairie	43.3854	-80.369	264
Arthropoda	Insecta	Diptera	Chironomidae	Orthocladiinae	Orthocladius		Angela Telfer	RRMFD1274-15	BOLD:AAB2644	pending	21-May-2015	Site 3 - South Field, forest edge	43.37	-80.364	312
Arthropoda	Insecta	Diptera	Chironomidae	Orthocladiinae	Orthocladius		Angela Telfer	RRMFD652-15	BOLD:AAB2644	pending	21-May-2015	Site 3 - South Field, forest edge	43.37	-80.364	312
Arthropoda	Insecta	Diptera	Chironomidae	Orthocladiinae	Orthocladius		Angela Telfer	RRMPA563-15	BOLD:AAB2644	pending	29-Apr-2015	Site 4 - Blair Flats, unburned prairie	43.3854	-80.369	264
Arthropoda	Insecta	Diptera	Chironomidae	Orthocladiinae	Orthocladius		Angela Telfer	RRMPC722-15	BOLD:AAB2644	pending	14-May-2015	Site 4 - Blair Flats, unburned prairie	43.385	-80.369	264
Arthropoda	Insecta	Diptera	Chironomidae	Orthocladiinae	Orthocladius		Angela Telfer	RRMPC120-15	BOLD:AAB2644	pending	14-May-2015	Site 4 - Blair Flats, unburned prairie	43.385	-80.369	264
Arthropoda	Insecta	Diptera	Chironomidae	Orthocladiinae	Orthocladius		Angela Telfer	RRMPA025-15	BOLD:AAB2644	pending	29-Apr-2015	Site 4 - Blair Flats, unburned prairie	43.3854	-80.369	264
Arthropoda	Insecta	Diptera	Chironomidae	Orthocladiinae	Orthocladius		Angela Telfer	RRMPA696-15	BOLD:AAB2644	pending	29-Apr-2015	Site 4 - Blair Flats, unburned prairie	43.3854	-80.369	264
Arthropoda	Insecta	Diptera	Chironomidae	Orthocladiinae	Orthocladius		Angela Telfer	RRMPD395-15	BOLD:AAB2644	pending	21-May-2015	Site 4 - Blair Flats, unburned prairie	43.385	-80.369	264
Arthropoda	Insecta	Diptera	Chironomidae	Orthocladiinae	Orthocladius		Angela Telfer	RRMPA718-15	BOLD:AAB2644	pending	29-Apr-2015	Site 4 - Blair Flats, unburned prairie	43.3854	-80.369	264
Arthropoda	Insecta	Diptera	Chironomidae	Orthocladiinae	Orthocladius		Angela Telfer	RRMPC311-15	BOLD:AAB2644	pending	14-May-2015	Site 4 - Blair Flats, unburned prairie	43.385	-80.369	264
Arthropoda	Insecta	Diptera	Chironomidae	Orthocladiinae	Orthocladius		Angela Telfer	RRMPC236-15	BOLD:AAB2644	pending	14-May-2015	Site 4 - Blair Flats, unburned prairie	43.385	-80.369	264
Arthropoda	Insecta	Diptera	Chironomidae	Orthocladiinae	Orthocladius		Angela Telfer	RRMFA012-15	BOLD:AAB2644	pending	29-Apr-2015	Site 3 - South Field, forest edge	43.3705	-80.3641	312
Arthropoda	Insecta	Diptera	Chironomidae	Orthocladiinae	Orthocladius		Angela Telfer	RRMPA438-15	BOLD:AAB2644	pending	29-Apr-2015	Site 4 - Blair Flats, unburned prairie	43.3854	-80.369	264
Arthropoda	Insecta	Diptera	Chironomidae	Orthocladiinae	Orthocladius		Angela Telfer	RRMPA159-15	BOLD:AAB2644	pending	29-Apr-2015	Site 4 - Blair Flats, unburned prairie	43.3854	-80.369	264
Arthropoda	Insecta	Diptera	Chironomidae	Orthocladiinae	Orthocladius		Angela Telfer	RRMPA510-15	BOLD:AAB2644	pending	29-Apr-2015	Site 4 - Blair Flats, unburned prairie	43.3854	-80.369	264
Arthropoda	Insecta	Diptera	Chironomidae	Orthocladiinae	Orthocladius		Angela Telfer	RRMPC587-15	BOLD:AAB2644	pending	14-May-2015	Site 4 - Blair Flats, unburned prairie	43.385	-80.369	264
Arthropoda	Insecta	Diptera	Chironomidae	Orthocladiinae	Orthocladius		Angela Telfer	RRMPC333-15	BOLD:AAB2644	pending	14-May-2015	Site 4 - Blair Flats, unburned prairie	43.385	-80.369	264
Arthropoda	Insecta	Diptera	Chironomidae	Orthocladiinae	Orthocladius		Angela Telfer	RRMPA799-15	BOLD:AAB2644	pending	29-Apr-2015	Site 4 - Blair Flats, unburned prairie	43.3854	-80.369	264
Arthropoda	Insecta	Diptera	Chironomidae	Orthocladiinae	Orthocladius		Angela Telfer	RRMPC754-15	BOLD:AAB2644	pending	14-May-2015	Site 4 - Blair Flats, unburned prairie	43.385	-80.369	264
Arthropoda	Insecta	Diptera	Chironomidae	Orthocladiinae	Orthocladius		Angela Telfer	RRMPD584-15	BOLD:AAB2644	pending	21-May-2015	Site 4 - Blair Flats, unburned prairie	43.385	-80.369	264
Arthropoda	Insecta	Diptera	Chironomidae	Orthocladiinae	Orthocladius		Angela Telfer	RRMPC1072-15	BOLD:AAB2644	pending	14-May-2015	Site 4 - Blair Flats, unburned prairie	43.385	-80.369	264
Arthropoda	Insecta	Diptera	Chironomidae	Orthocladiinae	Orthocladius		Angela Telfer	RRMPA805-15	BOLD:AAB2644	pending	29-Apr-2015	Site 4 - Blair Flats, unburned prairie	43.3854	-80.369	264
Arthropoda	Insecta	Diptera	Chironomidae	Orthocladiinae	Orthocladius		Angela Telfer	RRMPC1065-15	BOLD:AAB2644	pending	14-May-2015	Site 4 - Blair Flats, unburned prairie	43.385	-80.369	264
Arthropoda	Insecta	Diptera	Chironomidae	Orthocladiinae	Orthocladius		Angela Telfer	RRMPA678-15	BOLD:AAB2644	pending	29-Apr-2015	Site 4 - Blair Flats, unburned prairie	43.3854	-80.369	264
Arthropoda	Insecta	Diptera	Chironomidae	Orthocladiinae	Orthocladius		Angela Telfer	RRMPC1108-15	BOLD:AAB2644	pending	14-May-2015	Site 4 - Blair Flats, unburned prairie	43.385	-80.369	264
Arthropoda	Insecta	Diptera	Chironomidae	Orthocladiinae	Orthocladius		Angela Telfer	RRMPA216-15	BOLD:AAB2644	pending	29-Apr-2015	Site 4 - Blair Flats, unburned prairie	43.3854	-80.369	264
Arthropoda	Insecta	Diptera	Chironomidae	Orthocladiinae	Orthocladius		Angela Telfer	RRMPD168-15	BOLD:AAB2644	pending	21-May-2015	Site 4 - Blair Flats, unburned prairie	43.385	-80.369	264
Arthropoda	Insecta	Diptera	Chironomidae	Orthocladiinae	Orthocladius		Angela Telfer	RRMPC263-15	BOLD:AAB2644	pending	14-May-2015	Site 4 - Blair Flats, unburned prairie	43.385	-80.369	264
Arthropoda	Insecta	Diptera	Chironomidae	Orthocladiinae	Orthocladius		Angela Telfer	RRMPB1698-15	BOLD:AAB2644	pending	07-May-2015	Site 4 - Blair Flats, unburned prairie	43.385	-80.369	264
Arthropoda	Insecta	Diptera	Chironomidae	Orthocladiinae	Orthocladius		Angela Telfer	RRMFA079-15	BOLD:AAB2644	pending	29-Apr-2015	Site 3 - South Field, forest edge	43.3705	-80.3641	312
Arthropoda	Insecta	Diptera	Chironomidae	Orthocladiinae	Orthocladius		Angela Telfer	RRMPC1106-15	BOLD:AAB2644	pending	14-May-2015	Site 4 - Blair Flats, unburned prairie	43.385	-80.369	264
Arthropoda	Insecta	Diptera	Chironomidae	Orthocladiinae	Orthocladius		Angela Telfer	RRMPA241-15	BOLD:AAB2644	pending	29-Apr-2015	Site 4 - Blair Flats, unburned prairie	43.3854	-80.369	264
Arthropoda	Insecta	Diptera	Chironomidae	Orthocladiinae	Orthocladius		Angela Telfer	RRMPA635-15	BOLD:AAB2644	pending	29-Apr-2015	Site 4 - Blair Flats, unburned prairie	43.3854	-80.369	264
Arthropoda	Insecta	Diptera	Chironomidae	Orthocladiinae	Orthocladius		Angela Telfer	RRMPB610-15	BOLD:AAB2644	pending	07-May-2015	Site 4 - Blair Flats, unburned prairie	43.385	-80.369	264
Arthropoda	Insecta	Diptera	Chironomidae	Orthocladiinae	Orthocladius		Angela Telfer	RRMPC622-15	BOLD:AAB2644	pending	14-May-2015	Site 4 - Blair Flats, unburned prairie	43.385	-80.369	264
Arthropoda	Insecta	Diptera	Chironomidae	Orthocladiinae	Orthocladius		Angela Telfer	RRMPD266-15	BOLD:AAB2644	pending	21-May-2015	Site 4 - Blair Flats, unburned prairie	43.385	-80.369	264
Arthropoda	Insecta	Diptera	Chironomidae	Orthocladiinae	Orthocladius		Angela Telfer	RRMFD998-15	BOLD:AAB2644	pending	21-May-2015	Site 3 - South Field, forest edge	43.37	-80.364	312
Arthropoda	Insecta	Diptera	Chironomidae	Orthocladiinae	Orthocladius		Angela Telfer	RRMFC1493-15	BOLD:AAB2644	pending	14-May-2015	Site 3 - South Field, forest edge	43.37	-80.364	312
Arthropoda	Insecta	Diptera	Chironomidae	Orthocladiinae	Orthocladius		Angela Telfer	RRMPC811-15	BOLD:AAB2644	pending	14-May-2015	Site 4 - Blair Flats, unburned prairie	43.385	-80.369	264
Arthropoda	Insecta	Diptera	Chironomidae	Orthocladiinae	Orthocladius		Angela Telfer	RRMFD625-15	BOLD:AAB2644	pending	21-May-2015	Site 3 - South Field, forest edge	43.37	-80.364	312
Arthropoda	Insecta	Diptera	Chironomidae	Orthocladiinae	Orthocladius		Angela Telfer	RRMPA600-15	BOLD:AAB2644	pending	29-Apr-2015	Site 4 - Blair Flats, unburned prairie	43.3854	-80.369	264
Arthropoda	Insecta	Diptera	Chironomidae	Orthocladiinae	Orthocladius		Angela Telfer	RRMFD844-15	BOLD:AAB2644	pending	21-May-2015	Site 3 - South Field, forest edge	43.37	-80.364	312
Arthropoda	Insecta	Diptera	Chironomidae	Orthocladiinae	Orthocladius		Angela Telfer	RRMPA058-15	BOLD:AAB2644	pending	29-Apr-2015	Site 4 - Blair Flats, unburned prairie	43.3854	-80.369	264
Arthropoda	Insecta	Diptera	Chironomidae	Orthocladiinae	Orthocladius		Angela Telfer	RRMPA706-15	BOLD:AAB2644	pending	29-Apr-2015	Site 4 - Blair Flats, unburned prairie	43.3854	-80.369	264
Arthropoda	Insecta	Diptera	Chironomidae	Orthocladiinae	Orthocladius		Angela Telfer	RRMPA243-15	BOLD:AAB2644	pending	29-Apr-2015	Site 4 - Blair Flats, unburned prairie	43.3854	-80.369	264
Arthropoda	Insecta	Diptera	Chironomidae	Orthocladiinae	Orthocladius		Angela Telfer	RRMPB3567-15	BOLD:AAB2644	pending	07-May-2015	Site 4 - Blair Flats, unburned prairie	43.385	-80.369	264
Arthropoda	Insecta	Diptera	Chironomidae	Orthocladiinae	Orthocladius		Angela Telfer	RRMPC491-15	BOLD:AAB2644	pending	14-May-2015	Site 4 - Blair Flats, unburned prairie	43.385	-80.369	264
Arthropoda	Insecta	Diptera	Chironomidae	Orthocladiinae	Orthocladius		Angela Telfer	RRMPA589-15	BOLD:AAB2644	pending	29-Apr-2015	Site 4 - Blair Flats, unburned prairie	43.3854	-80.369	264
Arthropoda	Insecta	Diptera	Chironomidae	Orthocladiinae	Orthocladius		Angela Telfer	RRBAA618-15	BOLD:AAB2644	pending	01-May-2015	Site 1 - Woodland Trail, alvar	43.379	-80.346	288
Arthropoda	Insecta	Diptera	Chironomidae	Orthocladiinae	Orthocladius		Angela Telfer	RRMFC405-15	BOLD:AAB2644	pending	14-May-2015	Site 3 - South Field, forest edge	43.37	-80.364	312
Arthropoda	Insecta	Diptera	Chironomidae	Orthocladiinae	Orthocladius		Angela Telfer	RRMPA540-15	BOLD:AAB2644	pending	29-Apr-2015	Site 4 - Blair Flats, unburned prairie	43.3854	-80.369	264
Arthropoda	Insecta	Diptera	Chironomidae	Orthocladiinae	Orthocladius		Angela Telfer	RRMPC1058-15	BOLD:AAB2644	pending	14-May-2015	Site 4 - Blair Flats, unburned prairie	43.385	-80.369	264
Arthropoda	Insecta	Diptera	Chironomidae	Orthocladiinae	Orthocladius		Angela Telfer	RRMPE146-15	BOLD:AAB2644	pending	27-May-2015	Site 4 - Blair Flats, unburned prairie	43.385	-80.369	264
Arthropoda	Insecta	Diptera	Chironomidae	Orthocladiinae	Orthocladius		Angela Telfer	RRMPD311-15	BOLD:AAB2644	pending	21-May-2015	Site 4 - Blair Flats, unburned prairie	43.385	-80.369	264
Arthropoda	Insecta	Diptera	Chironomidae	Orthocladiinae	Orthocladius		Angela Telfer	RRMPC670-15	BOLD:AAB2644	pending	14-May-2015	Site 4 - Blair Flats, unburned prairie	43.385	-80.369	264
Arthropoda	Insecta	Diptera	Chironomidae	Orthocladiinae	Orthocladius		Angela Telfer	RRMPA313-15	BOLD:AAB2644	pending	29-Apr-2015	Site 4 - Blair Flats, unburned prairie	43.3854	-80.369	264
Arthropoda	Insecta	Diptera	Chironomidae	Orthocladiinae	Orthocladius		Angela Telfer	RRMPA295-15	BOLD:AAB2644	pending	29-Apr-2015	Site 4 - Blair Flats, unburned prairie	43.3854	-80.369	264
Arthropoda	Insecta	Diptera	Chironomidae	Orthocladiinae	Orthocladius		Angela Telfer	RRMFA007-15	BOLD:AAB2644	pending	29-Apr-2015	Site 3 - South Field, forest edge	43.3705	-80.3641	312
Arthropoda	Insecta	Diptera	Chironomidae	Orthocladiinae	Orthocladius		Angela Telfer	RRMFC1467-15	BOLD:AAB2644	pending	14-May-2015	Site 3 - South Field, forest edge	43.37	-80.364	312
Arthropoda	Insecta	Diptera	Chironomidae	Orthocladiinae	Orthocladius		Angela Telfer	RRMFD1130-15	BOLD:AAB2644	pending	21-May-2015	Site 3 - South Field, forest edge	43.37	-80.364	312
Arthropoda	Insecta	Diptera	Chironomidae	Orthocladiinae	Orthocladius		Angela Telfer	RRMPC395-15	BOLD:AAB2644	pending	14-May-2015	Site 4 - Blair Flats, unburned prairie	43.385	-80.369	264
Arthropoda	Insecta	Diptera	Chironomidae	Orthocladiinae	Orthocladius		Angela Telfer	RRMPA469-15	BOLD:AAB2644	pending	29-Apr-2015	Site 4 - Blair Flats, unburned prairie	43.3854	-80.369	264
Arthropoda	Insecta	Diptera	Chironomidae	Orthocladiinae	Orthocladius		Angela Telfer	RRMPA756-15	BOLD:AAB2644	pending	29-Apr-2015	Site 4 - Blair Flats, unburned prairie	43.3854	-80.369	264
Arthropoda	Insecta	Diptera	Chironomidae	Orthocladiinae	Orthocladius		Angela Telfer	RRMPA360-15	BOLD:AAB2644	pending	29-Apr-2015	Site 4 - Blair Flats, unburned prairie	43.3854	-80.369	264
Arthropoda	Insecta	Diptera	Chironomidae	Orthocladiinae	Orthocladius		Angela Telfer	RRMFA020-15	BOLD:AAB2644	pending	29-Apr-2015	Site 3 - South Field, forest edge	43.3705	-80.3641	312
Arthropoda	Insecta	Diptera	Chironomidae	Orthocladiinae	Orthocladius		Angela Telfer	RRMPC313-15	BOLD:AAB2644	pending	14-May-2015	Site 4 - Blair Flats, unburned prairie	43.385	-80.369	264
Arthropoda	Insecta	Diptera	Chironomidae	Orthocladiinae	Orthocladius		Angela Telfer	RRMPA299-15	BOLD:AAB2644	pending	29-Apr-2015	Site 4 - Blair Flats, unburned prairie	43.3854	-80.369	264
Arthropoda	Insecta	Diptera	Chironomidae	Orthocladiinae	Orthocladius		Angela Telfer	RRMPA405-15	BOLD:AAB2644	pending	29-Apr-2015	Site 4 - Blair Flats, unburned prairie	43.3854	-80.369	264
Arthropoda	Insecta	Diptera	Chironomidae	Orthocladiinae	Orthocladius		Angela Telfer	RRMPC304-15	BOLD:AAB2644	pending	14-May-2015	Site 4 - Blair Flats, unburned prairie	43.385	-80.369	264
Arthropoda	Insecta	Diptera	Chironomidae	Orthocladiinae	Orthocladius		Angela Telfer	RRMPC1104-15	BOLD:AAB2644	pending	14-May-2015	Site 4 - Blair Flats, unburned prairie	43.385	-80.369	264
Arthropoda	Insecta	Diptera	Chironomidae	Orthocladiinae	Orthocladius		Angela Telfer	RRMPC185-15	BOLD:AAB2644	pending	14-May-2015	Site 4 - Blair Flats, unburned prairie	43.385	-80.369	264
Arthropoda	Insecta	Diptera	Chironomidae	Orthocladiinae	Orthocladius		Angela Telfer	RRMPD201-15	BOLD:AAB2644	pending	21-May-2015	Site 4 - Blair Flats, unburned prairie	43.385	-80.369	264
Arthropoda	Insecta	Diptera	Chironomidae	Orthocladiinae	Orthocladius		Angela Telfer	RRMFA017-15	BOLD:AAB2644	pending	29-Apr-2015	Site 3 - South Field, forest edge	43.3705	-80.3641	312
Arthropoda	Insecta	Diptera	Chironomidae	Orthocladiinae	Orthocladius		Angela Telfer	RRMPC820-15	BOLD:AAB2644	pending	14-May-2015	Site 4 - Blair Flats, unburned prairie	43.385	-80.369	264
Arthropoda	Insecta	Diptera	Chironomidae	Orthocladiinae	Orthocladius		Angela Telfer	RRMFD1269-15	BOLD:AAB2644	pending	21-May-2015	Site 3 - South Field, forest edge	43.37	-80.364	312
Arthropoda	Insecta	Diptera	Chironomidae	Orthocladiinae	Orthocladius		Angela Telfer	RRMPB2010-15	BOLD:AAB2644	pending	07-May-2015	Site 4 - Blair Flats, unburned prairie	43.385	-80.369	264
Arthropoda	Insecta	Diptera	Chironomidae	Orthocladiinae	Orthocladius		Angela Telfer	RRMFC1616-15	BOLD:AAB2644	pending	14-May-2015	Site 3 - South Field, forest edge	43.37	-80.364	312
Arthropoda	Insecta	Diptera	Chironomidae	Orthocladiinae	Orthocladius		Angela Telfer	RRMPC457-15	BOLD:AAB2644	pending	14-May-2015	Site 4 - Blair Flats, unburned prairie	43.385	-80.369	264
Arthropoda	Insecta	Diptera	Chironomidae	Orthocladiinae	Orthocladius		Angela Telfer	RRMPD547-15	BOLD:AAB2644	pending	21-May-2015	Site 4 - Blair Flats, unburned prairie	43.385	-80.369	264
Arthropoda	Insecta	Diptera	Chironomidae	Orthocladiinae	Orthocladius		Angela Telfer	RRMPA353-15	BOLD:AAB2644	pending	29-Apr-2015	Site 4 - Blair Flats, unburned prairie	43.3854	-80.369	264
Arthropoda	Insecta	Diptera	Chironomidae	Orthocladiinae	Orthocladius		Angela Telfer	RRMPC330-15	BOLD:AAB2644	pending	14-May-2015	Site 4 - Blair Flats, unburned prairie	43.385	-80.369	264
Arthropoda	Insecta	Diptera	Chironomidae	Orthocladiinae	Orthocladius		Angela Telfer	RRMPC210-15	BOLD:AAB2644	pending	14-May-2015	Site 4 - Blair Flats, unburned prairie	43.385	-80.369	264
Arthropoda	Insecta	Diptera	Chironomidae	Orthocladiinae	Orthocladius		Angela Telfer	RRMPC238-15	BOLD:AAB2644	pending	14-May-2015	Site 4 - Blair Flats, unburned prairie	43.385	-80.369	264
Arthropoda	Insecta	Diptera	Chironomidae	Orthocladiinae	Orthocladius		Angela Telfer	RRMPA344-15	BOLD:AAB2644	pending	29-Apr-2015	Site 4 - Blair Flats, unburned prairie	43.3854	-80.369	264
Arthropoda	Insecta	Diptera	Chironomidae	Orthocladiinae	Orthocladius		Angela Telfer	RRMFC526-15	BOLD:AAB2644	pending	14-May-2015	Site 3 - South Field, forest edge	43.37	-80.364	312
Arthropoda	Insecta	Diptera	Chironomidae	Orthocladiinae	Orthocladius		Angela Telfer	RRMPD438-15	BOLD:AAB2644	pending	21-May-2015	Site 4 - Blair Flats, unburned prairie	43.385	-80.369	264
Arthropoda	Insecta	Diptera	Chironomidae	Orthocladiinae	Orthocladius		Angela Telfer	RRMPC737-15	BOLD:AAB2644	pending	14-May-2015	Site 4 - Blair Flats, unburned prairie	43.385	-80.369	264
Arthropoda	Insecta	Diptera	Chironomidae	Orthocladiinae	Orthocladius		Angela Telfer	RRMPC507-15	BOLD:AAB2644	pending	14-May-2015	Site 4 - Blair Flats, unburned prairie	43.385	-80.369	264
Arthropoda	Insecta	Diptera	Chironomidae	Orthocladiinae	Orthocladius		Angela Telfer	RRMPC067-15	BOLD:AAB2644	pending	14-May-2015	Site 4 - Blair Flats, unburned prairie	43.385	-80.369	264
Arthropoda	Insecta	Diptera	Chironomidae	Orthocladiinae	Orthocladius		Angela Telfer	RRMPD341-15	BOLD:AAB2644	pending	21-May-2015	Site 4 - Blair Flats, unburned prairie	43.385	-80.369	264
Arthropoda	Insecta	Diptera	Chironomidae	Orthocladiinae	Orthocladius		Angela Telfer	RRMPC059-15	BOLD:AAB2644	pending	14-May-2015	Site 4 - Blair Flats, unburned prairie	43.385	-80.369	264
Arthropoda	Insecta	Diptera	Chironomidae	Orthocladiinae	Orthocladius		Angela Telfer	RRMPA230-15	BOLD:AAB2644	pending	29-Apr-2015	Site 4 - Blair Flats, unburned prairie	43.3854	-80.369	264
Arthropoda	Insecta	Diptera	Chironomidae	Orthocladiinae	Orthocladius		Angela Telfer	RRMPC058-15	BOLD:AAB2644	pending	14-May-2015	Site 4 - Blair Flats, unburned prairie	43.385	-80.369	264
Arthropoda	Insecta	Diptera	Chironomidae	Orthocladiinae	Orthocladius		Angela Telfer	RRMFD1368-15	BOLD:AAB2644	pending	21-May-2015	Site 3 - South Field, forest edge	43.37	-80.364	312
Arthropoda	Insecta	Diptera	Chironomidae	Orthocladiinae	Orthocladius		Angela Telfer	RRMFD1417-15	BOLD:AAB2644	pending	21-May-2015	Site 3 - South Field, forest edge	43.37	-80.364	312
Arthropoda	Insecta	Diptera	Chironomidae	Orthocladiinae	Orthocladius		Angela Telfer	RRMPA188-15	BOLD:AAB2644	pending	29-Apr-2015	Site 4 - Blair Flats, unburned prairie	43.3854	-80.369	264
Arthropoda	Insecta	Diptera	Chironomidae	Orthocladiinae	Orthocladius		Angela Telfer	RRMPC202-15	BOLD:AAB2644	pending	14-May-2015	Site 4 - Blair Flats, unburned prairie	43.385	-80.369	264
Arthropoda	Insecta	Diptera	Chironomidae	Orthocladiinae	Orthocladius		Angela Telfer	RRMPC1032-15	BOLD:AAB2644	pending	14-May-2015	Site 4 - Blair Flats, unburned prairie	43.385	-80.369	264
Arthropoda	Insecta	Diptera	Chironomidae	Orthocladiinae	Orthocladius		Angela Telfer	RRMPA487-15	BOLD:AAB2644	pending	29-Apr-2015	Site 4 - Blair Flats, unburned prairie	43.3854	-80.369	264
Arthropoda	Insecta	Diptera	Chironomidae	Orthocladiinae	Orthocladius		Angela Telfer	RRMPA723-15	BOLD:AAB2644	pending	29-Apr-2015	Site 4 - Blair Flats, unburned prairie	43.3854	-80.369	264
Arthropoda	Insecta	Diptera	Chironomidae	Orthocladiinae	Orthocladius		Angela Telfer	RRMFD585-15	BOLD:AAB2644	pending	21-May-2015	Site 3 - South Field, forest edge	43.37	-80.364	312
Arthropoda	Insecta	Diptera	Chironomidae	Orthocladiinae	Orthocladius		Angela Telfer	RRMPC442-15	BOLD:AAB2644	pending	14-May-2015	Site 4 - Blair Flats, unburned prairie	43.385	-80.369	264
Arthropoda	Insecta	Diptera	Chironomidae	Orthocladiinae	Orthocladius		Angela Telfer	RRMPA547-15	BOLD:AAB2644	pending	29-Apr-2015	Site 4 - Blair Flats, unburned prairie	43.3854	-80.369	264
Arthropoda	Insecta	Diptera	Chironomidae	Orthocladiinae	Orthocladius		Angela Telfer	RRMPA337-15	BOLD:AAB2644	pending	29-Apr-2015	Site 4 - Blair Flats, unburned prairie	43.3854	-80.369	264
Arthropoda	Insecta	Diptera	Chironomidae	Orthocladiinae	Orthocladius		Angela Telfer	RRMFD667-15	BOLD:AAB2644	pending	21-May-2015	Site 3 - South Field, forest edge	43.37	-80.364	312
Arthropoda	Insecta	Diptera	Chironomidae	Orthocladiinae	Orthocladius		Angela Telfer	RRMPA156-15	BOLD:AAB2644	pending	29-Apr-2015	Site 4 - Blair Flats, unburned prairie	43.3854	-80.369	264
Arthropoda	Insecta	Diptera	Chironomidae	Orthocladiinae	Orthocladius		Angela Telfer	RRMPA781-15	BOLD:AAB2644	pending	29-Apr-2015	Site 4 - Blair Flats, unburned prairie	43.3854	-80.369	264
Arthropoda	Insecta	Diptera	Chironomidae	Orthocladiinae	Orthocladius		Angela Telfer	RRMPC582-15	BOLD:AAB2644	pending	14-May-2015	Site 4 - Blair Flats, unburned prairie	43.385	-80.369	264
Arthropoda	Insecta	Diptera	Chironomidae	Orthocladiinae	Orthocladius		Angela Telfer	RRMPA254-15	BOLD:AAB2644	pending	29-Apr-2015	Site 4 - Blair Flats, unburned prairie	43.3854	-80.369	264
Arthropoda	Insecta	Diptera	Chironomidae	Orthocladiinae	Orthocladius		Angela Telfer	RRMFD1020-15	BOLD:AAB2644	pending	21-May-2015	Site 3 - South Field, forest edge	43.37	-80.364	312
Arthropoda	Insecta	Diptera	Chironomidae	Orthocladiinae	Orthocladius		Angela Telfer	RRMPA187-15	BOLD:AAB2644	pending	29-Apr-2015	Site 4 - Blair Flats, unburned prairie	43.3854	-80.369	264
Arthropoda	Insecta	Diptera	Chironomidae	Orthocladiinae	Orthocladius		Angela Telfer	RRMPA498-15	BOLD:AAB2644	pending	29-Apr-2015	Site 4 - Blair Flats, unburned prairie	43.3854	-80.369	264
Arthropoda	Insecta	Diptera	Chironomidae	Orthocladiinae	Orthocladius		Angela Telfer	RRMPA300-15	BOLD:AAB2644	pending	29-Apr-2015	Site 4 - Blair Flats, unburned prairie	43.3854	-80.369	264
Arthropoda	Insecta	Diptera	Chironomidae	Orthocladiinae	Orthocladius		Angela Telfer	RRMPC1323-15	BOLD:AAB2644	pending	14-May-2015	Site 4 - Blair Flats, unburned prairie	43.385	-80.369	264
Arthropoda	Insecta	Diptera	Chironomidae	Orthocladiinae	Orthocladius		Angela Telfer	RRMPB3384-15	BOLD:AAB2644	pending	07-May-2015	Site 4 - Blair Flats, unburned prairie	43.385	-80.369	264
Arthropoda	Insecta	Diptera	Chironomidae	Orthocladiinae	Orthocladius		Angela Telfer	RRMFD691-15	BOLD:AAB2644	pending	21-May-2015	Site 3 - South Field, forest edge	43.37	-80.364	312
Arthropoda	Insecta	Diptera	Chironomidae	Orthocladiinae	Orthocladius		Angela Telfer	RRMPA039-15	BOLD:AAB2644	pending	29-Apr-2015	Site 4 - Blair Flats, unburned prairie	43.3854	-80.369	264
Arthropoda	Insecta	Diptera	Chironomidae	Orthocladiinae	Orthocladius		Angela Telfer	RRMFA125-15	BOLD:AAB2644	pending	29-Apr-2015	Site 3 - South Field, forest edge	43.3705	-80.3641	312
Arthropoda	Insecta	Diptera	Chironomidae	Orthocladiinae	Orthocladius		Angela Telfer	RRMPD543-15	BOLD:AAB2644	pending	21-May-2015	Site 4 - Blair Flats, unburned prairie	43.385	-80.369	264
Arthropoda	Insecta	Diptera	Chironomidae	Orthocladiinae	Orthocladius		Angela Telfer	RRMPA347-15	BOLD:AAB2644	pending	29-Apr-2015	Site 4 - Blair Flats, unburned prairie	43.3854	-80.369	264
Arthropoda	Insecta	Diptera	Chironomidae	Orthocladiinae	Orthocladius		Angela Telfer	RRMPC733-15	BOLD:AAB2644	pending	14-May-2015	Site 4 - Blair Flats, unburned prairie	43.385	-80.369	264
Arthropoda	Insecta	Diptera	Chironomidae	Orthocladiinae	Orthocladius		Angela Telfer	RRMPC1067-15	BOLD:AAB2644	pending	14-May-2015	Site 4 - Blair Flats, unburned prairie	43.385	-80.369	264
Arthropoda	Insecta	Diptera	Chironomidae	Orthocladiinae	Orthocladius		Angela Telfer	RRMPC262-15	BOLD:AAB2644	pending	14-May-2015	Site 4 - Blair Flats, unburned prairie	43.385	-80.369	264
Arthropoda	Insecta	Diptera	Chironomidae	Orthocladiinae	Orthocladius		Angela Telfer	RRMPC369-15	BOLD:AAB2644	pending	14-May-2015	Site 4 - Blair Flats, unburned prairie	43.385	-80.369	264
Arthropoda	Insecta	Diptera	Chironomidae	Orthocladiinae	Orthocladius		Angela Telfer	RRMPD568-15	BOLD:AAB2644	pending	21-May-2015	Site 4 - Blair Flats, unburned prairie	43.385	-80.369	264
Arthropoda	Insecta	Diptera	Chironomidae	Orthocladiinae	Orthocladius		Angela Telfer	RRMFD779-15	BOLD:AAB2644	pending	21-May-2015	Site 3 - South Field, forest edge	43.37	-80.364	312
Arthropoda	Insecta	Diptera	Chironomidae	Orthocladiinae	Orthocladius		Angela Telfer	RRMPA057-15	BOLD:AAB2644	pending	29-Apr-2015	Site 4 - Blair Flats, unburned prairie	43.3854	-80.369	264
Arthropoda	Insecta	Diptera	Chironomidae	Orthocladiinae	Orthocladius		Angela Telfer	RRMPC1310-15	BOLD:AAB2644	pending	14-May-2015	Site 4 - Blair Flats, unburned prairie	43.385	-80.369	264
Arthropoda	Insecta	Diptera	Chironomidae	Orthocladiinae	Orthocladius		Angela Telfer	RRMPC082-15	BOLD:AAB2644	pending	14-May-2015	Site 4 - Blair Flats, unburned prairie	43.385	-80.369	264
Arthropoda	Insecta	Diptera	Chironomidae	Orthocladiinae	Orthocladius		Angela Telfer	RRMPD329-15	BOLD:AAB2644	pending	21-May-2015	Site 4 - Blair Flats, unburned prairie	43.385	-80.369	264
Arthropoda	Insecta	Diptera	Chironomidae	Orthocladiinae	Orthocladius		Angela Telfer	RRMPC788-15	BOLD:AAB2644	pending	14-May-2015	Site 4 - Blair Flats, unburned prairie	43.385	-80.369	264
Arthropoda	Insecta	Diptera	Chironomidae	Orthocladiinae	Orthocladius		Angela Telfer	RRMPA461-15	BOLD:AAB2644	pending	29-Apr-2015	Site 4 - Blair Flats, unburned prairie	43.3854	-80.369	264
Arthropoda	Insecta	Diptera	Chironomidae	Orthocladiinae	Orthocladius		Angela Telfer	RRMFC1566-15	BOLD:AAB2644	pending	14-May-2015	Site 3 - South Field, forest edge	43.37	-80.364	312
Arthropoda	Insecta	Diptera	Chironomidae	Orthocladiinae	Orthocladius		Angela Telfer	RRMPC621-15	BOLD:AAB2644	pending	14-May-2015	Site 4 - Blair Flats, unburned prairie	43.385	-80.369	264
Arthropoda	Insecta	Diptera	Chironomidae	Orthocladiinae	Orthocladius		Angela Telfer	RRMFD668-15	BOLD:AAB2644	pending	21-May-2015	Site 3 - South Field, forest edge	43.37	-80.364	312
Arthropoda	Insecta	Diptera	Chironomidae	Orthocladiinae	Orthocladius		Angela Telfer	RRMFC1617-15	BOLD:AAB2644	pending	14-May-2015	Site 3 - South Field, forest edge	43.37	-80.364	312
Arthropoda	Insecta	Diptera	Chironomidae	Orthocladiinae	Orthocladius		Angela Telfer	RRMFA042-15	BOLD:AAB2644	pending	29-Apr-2015	Site 3 - South Field, forest edge	43.3705	-80.3641	312
Arthropoda	Insecta	Diptera	Chironomidae	Orthocladiinae	Orthocladius		Angela Telfer	RRMPA595-15	BOLD:AAB2644	pending	29-Apr-2015	Site 4 - Blair Flats, unburned prairie	43.3854	-80.369	264
Arthropoda	Insecta	Diptera	Chironomidae	Orthocladiinae	Orthocladius		Angela Telfer	RRMPC196-15	BOLD:AAB2644	pending	14-May-2015	Site 4 - Blair Flats, unburned prairie	43.385	-80.369	264
Arthropoda	Insecta	Diptera	Chironomidae	Orthocladiinae	Orthocladius		Angela Telfer	RRMPC585-15	BOLD:AAB2644	pending	14-May-2015	Site 4 - Blair Flats, unburned prairie	43.385	-80.369	264
Arthropoda	Insecta	Diptera	Chironomidae	Orthocladiinae	Orthocladius		Angela Telfer	RRMFB926-15	BOLD:AAB2644	pending	07-May-2015	Site 3 - South Field, forest edge	43.3705	-80.3641	312
Arthropoda	Insecta	Diptera	Chironomidae	Orthocladiinae	Orthocladius		Angela Telfer	RRMPA484-15	BOLD:AAB2644	pending	29-Apr-2015	Site 4 - Blair Flats, unburned prairie	43.3854	-80.369	264
Arthropoda	Insecta	Diptera	Chironomidae	Orthocladiinae	Orthocladius		Angela Telfer	RRMPA047-15	BOLD:AAB2644	pending	29-Apr-2015	Site 4 - Blair Flats, unburned prairie	43.3854	-80.369	264
Arthropoda	Insecta	Diptera	Chironomidae	Orthocladiinae	Orthocladius		Angela Telfer	RRMPC1318-15	BOLD:AAB2644	pending	14-May-2015	Site 4 - Blair Flats, unburned prairie	43.385	-80.369	264
Arthropoda	Insecta	Diptera	Chironomidae	Orthocladiinae	Orthocladius		Angela Telfer	RRMPB3213-15	BOLD:AAB2644	pending	07-May-2015	Site 4 - Blair Flats, unburned prairie	43.385	-80.369	264
Arthropoda	Insecta	Diptera	Chironomidae	Orthocladiinae	Orthocladius		Angela Telfer	RRMPA321-15	BOLD:AAB2644	pending	29-Apr-2015	Site 4 - Blair Flats, unburned prairie	43.3854	-80.369	264
Arthropoda	Insecta	Diptera	Chironomidae	Orthocladiinae	Orthocladius		Angela Telfer	RRMFC1479-15	BOLD:AAB2644	pending	14-May-2015	Site 3 - South Field, forest edge	43.37	-80.364	312
Arthropoda	Insecta	Diptera	Chironomidae	Orthocladiinae	Orthocladius		Angela Telfer	RRMPA038-15	BOLD:AAB2644	pending	29-Apr-2015	Site 4 - Blair Flats, unburned prairie	43.3854	-80.369	264
Arthropoda	Insecta	Diptera	Chironomidae	Orthocladiinae	Orthocladius		Angela Telfer	RRMPA073-15	BOLD:AAB2644	pending	29-Apr-2015	Site 4 - Blair Flats, unburned prairie	43.3854	-80.369	264
Arthropoda	Insecta	Diptera	Chironomidae	Orthocladiinae	Orthocladius		Angela Telfer	RRMPB3558-15	BOLD:AAB2644	pending	07-May-2015	Site 4 - Blair Flats, unburned prairie	43.385	-80.369	264
Arthropoda	Insecta	Diptera	Chironomidae	Orthocladiinae	Orthocladius		Angela Telfer	RRMPC719-15	BOLD:AAB2644	pending	14-May-2015	Site 4 - Blair Flats, unburned prairie	43.385	-80.369	264
Arthropoda	Insecta	Diptera	Chironomidae	Orthocladiinae	Orthocladius		Angela Telfer	RRMPC291-15	BOLD:AAB2644	pending	14-May-2015	Site 4 - Blair Flats, unburned prairie	43.385	-80.369	264
Arthropoda	Insecta	Diptera	Chironomidae	Orthocladiinae	Orthocladius		Angela Telfer	RRMPE099-15	BOLD:AAB2644	pending	27-May-2015	Site 4 - Blair Flats, unburned prairie	43.385	-80.369	264
Arthropoda	Insecta	Diptera	Chironomidae	Orthocladiinae	Orthocladius		Angela Telfer	RRMFC1203-15	BOLD:AAB2644	pending	14-May-2015	Site 3 - South Field, forest edge	43.37	-80.364	312
Arthropoda	Insecta	Diptera	Chironomidae	Orthocladiinae	Orthocladius		Angela Telfer	RRMPA807-15	BOLD:AAB2644	pending	29-Apr-2015	Site 4 - Blair Flats, unburned prairie	43.3854	-80.369	264
Arthropoda	Insecta	Diptera	Chironomidae	Orthocladiinae	Orthocladius		Angela Telfer	RRMPD208-15	BOLD:AAB2644	pending	21-May-2015	Site 4 - Blair Flats, unburned prairie	43.385	-80.369	264
Arthropoda	Insecta	Diptera	Chironomidae	Orthocladiinae	Orthocladius		Angela Telfer	RRMPC261-15	BOLD:AAB2644	pending	14-May-2015	Site 4 - Blair Flats, unburned prairie	43.385	-80.369	264
Arthropoda	Insecta	Diptera	Chironomidae	Orthocladiinae	Orthocladius		Angela Telfer	RRMFD1182-15	BOLD:AAB2644	pending	21-May-2015	Site 3 - South Field, forest edge	43.37	-80.364	312
Arthropoda	Insecta	Diptera	Chironomidae	Orthocladiinae	Orthocladius		Angela Telfer	RRMPD182-15	BOLD:AAB2644	pending	21-May-2015	Site 4 - Blair Flats, unburned prairie	43.385	-80.369	264
Arthropoda	Insecta	Diptera	Chironomidae	Orthocladiinae	Orthocladius		Angela Telfer	RRMFC583-15	BOLD:AAB2644	pending	14-May-2015	Site 3 - South Field, forest edge	43.37	-80.364	312
Arthropoda	Insecta	Diptera	Chironomidae	Orthocladiinae	Orthocladius		Angela Telfer	RRMPC769-15	BOLD:AAB2644	pending	14-May-2015	Site 4 - Blair Flats, unburned prairie	43.385	-80.369	264
Arthropoda	Insecta	Diptera	Chironomidae	Orthocladiinae	Orthocladius		Angela Telfer	RRMFA080-15	BOLD:AAB2644	pending	29-Apr-2015	Site 3 - South Field, forest edge	43.3705	-80.3641	312
Arthropoda	Insecta	Diptera	Chironomidae	Orthocladiinae	Orthocladius		Angela Telfer	RRMPC755-15	BOLD:AAB2644	pending	14-May-2015	Site 4 - Blair Flats, unburned prairie	43.385	-80.369	264
Arthropoda	Insecta	Diptera	Chironomidae	Orthocladiinae	Orthocladius		Angela Telfer	RRMPA268-15	BOLD:AAB2644	pending	29-Apr-2015	Site 4 - Blair Flats, unburned prairie	43.3854	-80.369	264
Arthropoda	Insecta	Diptera	Chironomidae	Orthocladiinae	Orthocladius		Angela Telfer	RRMPC387-15	BOLD:AAB2644	pending	14-May-2015	Site 4 - Blair Flats, unburned prairie	43.385	-80.369	264
Arthropoda	Insecta	Diptera	Chironomidae	Orthocladiinae	Orthocladius		Angela Telfer	RRMPA775-15	BOLD:AAB2644	pending	29-Apr-2015	Site 4 - Blair Flats, unburned prairie	43.3854	-80.369	264
Arthropoda	Insecta	Diptera	Chironomidae	Orthocladiinae	Orthocladius		Angela Telfer	RRMPC1311-15	BOLD:AAB2644	pending	14-May-2015	Site 4 - Blair Flats, unburned prairie	43.385	-80.369	264
Arthropoda	Insecta	Diptera	Chironomidae	Orthocladiinae	Orthocladius		Angela Telfer	RRMPB2048-15	BOLD:AAB2644	pending	07-May-2015	Site 4 - Blair Flats, unburned prairie	43.385	-80.369	264
Arthropoda	Insecta	Diptera	Chironomidae	Orthocladiinae	Orthocladius		Angela Telfer	RRMPA727-15	BOLD:AAB2644	pending	29-Apr-2015	Site 4 - Blair Flats, unburned prairie	43.3854	-80.369	264
Arthropoda	Insecta	Diptera	Chironomidae	Orthocladiinae	Orthocladius		Angela Telfer	RRMPD193-15	BOLD:AAB2644	pending	21-May-2015	Site 4 - Blair Flats, unburned prairie	43.385	-80.369	264
Arthropoda	Insecta	Diptera	Chironomidae	Orthocladiinae	Orthocladius		Angela Telfer	RRMPC488-15	BOLD:AAB2644	pending	14-May-2015	Site 4 - Blair Flats, unburned prairie	43.385	-80.369	264
Arthropoda	Insecta	Diptera	Chironomidae	Orthocladiinae	Orthocladius		Angela Telfer	RRMPA237-15	BOLD:AAB2644	pending	29-Apr-2015	Site 4 - Blair Flats, unburned prairie	43.3854	-80.369	264
Arthropoda	Insecta	Diptera	Chironomidae	Orthocladiinae	Orthocladius		Angela Telfer	RRMPA532-15	BOLD:AAB2644	pending	29-Apr-2015	Site 4 - Blair Flats, unburned prairie	43.3854	-80.369	264
Arthropoda	Insecta	Diptera	Chironomidae	Orthocladiinae	Orthocladius		Angela Telfer	RRMPC1118-15	BOLD:AAB2644	pending	14-May-2015	Site 4 - Blair Flats, unburned prairie	43.385	-80.369	264
Arthropoda	Insecta	Diptera	Chironomidae	Orthocladiinae	Orthocladius		Angela Telfer	RRMFD1070-15	BOLD:AAB2644	pending	21-May-2015	Site 3 - South Field, forest edge	43.37	-80.364	312
Arthropoda	Insecta	Diptera	Chironomidae	Orthocladiinae	Orthocladius		Angela Telfer	RRMPD458-15	BOLD:AAB2644	pending	21-May-2015	Site 4 - Blair Flats, unburned prairie	43.385	-80.369	264
Arthropoda	Insecta	Diptera	Chironomidae	Orthocladiinae	Orthocladius		Angela Telfer	RRMPA150-15	BOLD:AAB2644	pending	29-Apr-2015	Site 4 - Blair Flats, unburned prairie	43.3854	-80.369	264
Arthropoda	Insecta	Diptera	Chironomidae	Orthocladiinae	Orthocladius		Angela Telfer	RRMPA276-15	BOLD:AAB2644	pending	29-Apr-2015	Site 4 - Blair Flats, unburned prairie	43.3854	-80.369	264
Arthropoda	Insecta	Diptera	Chironomidae	Orthocladiinae	Orthocladius		Angela Telfer	RRMPC1248-15	BOLD:AAB2644	pending	14-May-2015	Site 4 - Blair Flats, unburned prairie	43.385	-80.369	264
Arthropoda	Insecta	Diptera	Chironomidae	Orthocladiinae	Orthocladius		Angela Telfer	RRMPC560-15	BOLD:AAB2644	pending	14-May-2015	Site 4 - Blair Flats, unburned prairie	43.385	-80.369	264
Arthropoda	Insecta	Diptera	Chironomidae	Orthocladiinae	Orthocladius		Angela Telfer	RRMFA111-15	BOLD:AAB2644	pending	29-Apr-2015	Site 3 - South Field, forest edge	43.3705	-80.3641	312
Arthropoda	Insecta	Diptera	Chironomidae	Orthocladiinae	Orthocladius		Angela Telfer	RRMPC064-15	BOLD:AAB2644	pending	14-May-2015	Site 4 - Blair Flats, unburned prairie	43.385	-80.369	264
Arthropoda	Insecta	Diptera	Chironomidae	Orthocladiinae	Orthocladius		Angela Telfer	RRMPC050-15	BOLD:AAB2644	pending	14-May-2015	Site 4 - Blair Flats, unburned prairie	43.385	-80.369	264
Arthropoda	Insecta	Diptera	Chironomidae	Orthocladiinae	Orthocladius		Angela Telfer	RRMFD1277-15	BOLD:AAB2644	pending	21-May-2015	Site 3 - South Field, forest edge	43.37	-80.364	312
Arthropoda	Insecta	Diptera	Chironomidae	Orthocladiinae	Orthocladius		Angela Telfer	RRMPA675-15	BOLD:AAB2644	pending	29-Apr-2015	Site 4 - Blair Flats, unburned prairie	43.3854	-80.369	264
Arthropoda	Insecta	Diptera	Chironomidae	Orthocladiinae	Orthocladius		Angela Telfer	RRMPB2702-15	BOLD:AAB2644	pending	07-May-2015	Site 4 - Blair Flats, unburned prairie	43.385	-80.369	264
Arthropoda	Insecta	Diptera	Chironomidae	Orthocladiinae	Orthocladius		Angela Telfer	RRMFA166-15	BOLD:AAB2644	pending	29-Apr-2015	Site 3 - South Field, forest edge	43.3705	-80.3641	312
Arthropoda	Insecta	Diptera	Chironomidae	Orthocladiinae	Orthocladius		Angela Telfer	RRMFD1029-15	BOLD:AAB2644	pending	21-May-2015	Site 3 - South Field, forest edge	43.37	-80.364	312
Arthropoda	Insecta	Diptera	Chironomidae	Orthocladiinae	Orthocladius		Angela Telfer	RRMPC219-15	BOLD:AAB2644	pending	14-May-2015	Site 4 - Blair Flats, unburned prairie	43.385	-80.369	264
Arthropoda	Insecta	Diptera	Chironomidae	Orthocladiinae	Orthocladius		Angela Telfer	RRMPA442-15	BOLD:AAB2644	pending	29-Apr-2015	Site 4 - Blair Flats, unburned prairie	43.3854	-80.369	264
Arthropoda	Insecta	Diptera	Chironomidae	Orthocladiinae	Orthocladius		Angela Telfer	RRMFA182-15	BOLD:AAB2644	pending	29-Apr-2015	Site 3 - South Field, forest edge	43.3705	-80.3641	312
Arthropoda	Insecta	Diptera	Chironomidae	Orthocladiinae	Orthocladius		Angela Telfer	RRMPB2308-15	BOLD:AAB2644	pending	07-May-2015	Site 4 - Blair Flats, unburned prairie	43.385	-80.369	264
Arthropoda	Insecta	Diptera	Chironomidae	Orthocladiinae	Orthocladius		Angela Telfer	RRMPC802-15	BOLD:AAB2644	pending	14-May-2015	Site 4 - Blair Flats, unburned prairie	43.385	-80.369	264
Arthropoda	Insecta	Diptera	Chironomidae	Orthocladiinae	Orthocladius		Angela Telfer	RRMPC126-15	BOLD:AAB2644	pending	14-May-2015	Site 4 - Blair Flats, unburned prairie	43.385	-80.369	264
Arthropoda	Insecta	Diptera	Chironomidae	Orthocladiinae	Orthocladius		Angela Telfer	RRMPC116-15	BOLD:AAB2644	pending	14-May-2015	Site 4 - Blair Flats, unburned prairie	43.385	-80.369	264
Arthropoda	Insecta	Diptera	Chironomidae	Orthocladiinae	Orthocladius		Angela Telfer	RRMPA550-15	BOLD:AAB2644	pending	29-Apr-2015	Site 4 - Blair Flats, unburned prairie	43.3854	-80.369	264
Arthropoda	Insecta	Diptera	Chironomidae	Orthocladiinae	Orthocladius		Angela Telfer	RRMPA740-15	BOLD:AAB2644	pending	29-Apr-2015	Site 4 - Blair Flats, unburned prairie	43.3854	-80.369	264
Arthropoda	Insecta	Diptera	Chironomidae	Orthocladiinae	Orthocladius		Angela Telfer	RRMFA174-15	BOLD:AAB2644	pending	29-Apr-2015	Site 3 - South Field, forest edge	43.3705	-80.3641	312
Arthropoda	Insecta	Diptera	Chironomidae	Orthocladiinae	Orthocladius		Angela Telfer	RRMFA085-15	BOLD:AAB2644	pending	29-Apr-2015	Site 3 - South Field, forest edge	43.3705	-80.3641	312
Arthropoda	Insecta	Diptera	Chironomidae	Orthocladiinae	Orthocladius		Angela Telfer	RRMPA581-15	BOLD:AAB2644	pending	29-Apr-2015	Site 4 - Blair Flats, unburned prairie	43.3854	-80.369	264
Arthropoda	Insecta	Diptera	Chironomidae	Orthocladiinae	Orthocladius		Angela Telfer	RRMFA078-15	BOLD:AAB2644	pending	29-Apr-2015	Site 3 - South Field, forest edge	43.3705	-80.3641	312
Arthropoda	Insecta	Diptera	Chironomidae	Orthocladiinae	Orthocladius		Angela Telfer	RRMFA014-15	BOLD:AAB2644	pending	29-Apr-2015	Site 3 - South Field, forest edge	43.3705	-80.3641	312
Arthropoda	Insecta	Diptera	Chironomidae	Orthocladiinae	Orthocladius	Orthocladius dorenus	Angela Telfer	RRMPB230-15	BOLD:AAB2645	pending	07-May-2015	Site 4 - Blair Flats, unburned prairie	43.385	-80.369	264
Arthropoda	Insecta	Hymenoptera	Colletidae	Hylaeinae	Hylaeus		Angela Telfer	RRMFE2660-15	BOLD:AAB2744	pending	27-May-2015	Site 3 - South Field, forest edge	43.3705	-80.3641	312
Arthropoda	Insecta	Coleoptera	Curculionidae	Scolytinae	Xyleborinus	Xyleborinus alni	Angela Telfer	RRMFB1412-15	BOLD:AAB2754	pending	07-May-2015	Site 3 - South Field, forest edge	43.37	-80.364	312
Arthropoda	Insecta	Coleoptera	Curculionidae	Scolytinae	Xyleborinus	Xyleborinus alni	Angela Telfer	RRMFA272-15	BOLD:AAB2754	pending	29-Apr-2015	Site 3 - South Field, forest edge	43.3705	-80.3641	312
Arthropoda	Insecta	Coleoptera	Curculionidae	Scolytinae	Xyleborinus	Xyleborinus alni	Angela Telfer	RRMFC023-15	BOLD:AAB2754	pending	14-May-2015	Site 3 - South Field, forest edge	43.37	-80.364	312
Arthropoda	Arachnida	Araneae	Philodromidae		Philodromus	Philodromus rufus vibrans	Gergin A. Blagoev	RRSSA327-15	BOLD:AAB2768	pending	29-May-2015	Site 1 - Field Edge Forest	43.374	-80.354	332
Arthropoda	Arachnida	Araneae	Philodromidae		Philodromus	Philodromus rufus vibrans	Gergin A. Blagoev	RRSPI243-15	BOLD:AAB2768	pending	04-Jun-2015	Around the Site 2 and Site 3	43.37	-80.364	312
Arthropoda	Arachnida	Araneae	Philodromidae		Philodromus	Philodromus rufus vibrans	Gergin A. Blagoev	RRSSA1622-15	BOLD:AAB2768	pending	31-May-2015	Site 1 - Field Edge Forest	43.374	-80.354	332
Arthropoda	Arachnida	Araneae	Philodromidae		Philodromus	Philodromus rufus vibrans	Gergin A. Blagoev	RRSSA1615-15	BOLD:AAB2768	pending	31-May-2015	Site 1 - Field Edge Forest	43.374	-80.354	332
Arthropoda	Arachnida	Araneae	Philodromidae		Philodromus	Philodromus rufus vibrans	Gergin A. Blagoev	RRSPI218-15	BOLD:AAB2768	pending	25-May-2015	Site 3 - Grassy Wetland	43.391	-80.375	270
Arthropoda	Insecta	Diptera	Syrphidae	Syrphinae	Melanostoma		Angela Telfer	RRMFD407-15	BOLD:AAB2866	pending	21-May-2015	Site 3 - South Field, forest edge	43.37	-80.364	312
Arthropoda	Insecta	Diptera	Syrphidae	Syrphinae	Melanostoma		Angela Telfer	RRMFC2090-15	BOLD:AAB2866	pending	14-May-2015	Site 3 - South Field, forest edge	43.37	-80.364	312
Arthropoda	Insecta	Diptera	Syrphidae	Syrphinae	Melanostoma		Angela Telfer	RRMFE2932-15	BOLD:AAB2866	pending	27-May-2015	Site 3 - South Field, forest edge	43.3705	-80.3641	312
Arthropoda	Insecta	Diptera	Syrphidae	Syrphinae	Melanostoma		Angela Telfer	RRMFE2939-15	BOLD:AAB2866	pending	27-May-2015	Site 3 - South Field, forest edge	43.3705	-80.3641	312
Arthropoda	Insecta	Diptera	Syrphidae	Syrphinae	Melanostoma		Angela Telfer	RRMFE2911-15	BOLD:AAB2866	pending	27-May-2015	Site 3 - South Field, forest edge	43.3705	-80.3641	312
Arthropoda	Insecta	Diptera	Syrphidae	Syrphinae	Melanostoma		Angela Telfer	RRMFD119-15	BOLD:AAB2866	pending	21-May-2015	Site 3 - South Field, forest edge	43.37	-80.364	312
Arthropoda	Insecta	Diptera	Syrphidae	Syrphinae	Melanostoma		Angela Telfer	RRMFD113-15	BOLD:AAB2866	pending	21-May-2015	Site 3 - South Field, forest edge	43.37	-80.364	312
Arthropoda	Insecta	Diptera	Syrphidae	Syrphinae	Melanostoma		Angela Telfer	RRMFD128-15	BOLD:AAB2866	pending	21-May-2015	Site 3 - South Field, forest edge	43.37	-80.364	312
Arthropoda	Insecta	Diptera	Syrphidae	Syrphinae	Melanostoma		Angela Telfer	RRMFE2907-15	BOLD:AAB2866	pending	27-May-2015	Site 3 - South Field, forest edge	43.3705	-80.3641	312
Arthropoda	Insecta	Diptera	Syrphidae	Syrphinae	Melanostoma		Angela Telfer	RRMFD124-15	BOLD:AAB2866	pending	21-May-2015	Site 3 - South Field, forest edge	43.37	-80.364	312
Arthropoda	Insecta	Diptera	Syrphidae	Syrphinae	Melanostoma		Angela Telfer	RRMFE2930-15	BOLD:AAB2866	pending	27-May-2015	Site 3 - South Field, forest edge	43.3705	-80.3641	312
Arthropoda	Insecta	Diptera	Syrphidae	Syrphinae	Melanostoma		Angela Telfer	RRMFD415-15	BOLD:AAB2866	pending	21-May-2015	Site 3 - South Field, forest edge	43.37	-80.364	312
Arthropoda	Insecta	Diptera	Syrphidae	Syrphinae	Melanostoma		Angela Telfer	RRMFE2949-15	BOLD:AAB2866	pending	27-May-2015	Site 3 - South Field, forest edge	43.3705	-80.3641	312
Arthropoda	Insecta	Diptera	Syrphidae	Syrphinae	Melanostoma		Angela Telfer	RRMFE2915-15	BOLD:AAB2866	pending	27-May-2015	Site 3 - South Field, forest edge	43.3705	-80.3641	312
Arthropoda	Insecta	Diptera	Syrphidae	Syrphinae	Melanostoma		Angela Telfer	RRMFE971-15	BOLD:AAB2866	pending	27-May-2015	Site 3 - South Field, forest edge	43.37	-80.364	312
Arthropoda	Insecta	Diptera	Syrphidae	Syrphinae	Melanostoma		Angela Telfer	RRMFD427-15	BOLD:AAB2866	pending	21-May-2015	Site 3 - South Field, forest edge	43.37	-80.364	312
Arthropoda	Insecta	Diptera	Syrphidae	Syrphinae	Melanostoma		Angela Telfer	RRMFE2912-15	BOLD:AAB2866	pending	27-May-2015	Site 3 - South Field, forest edge	43.3705	-80.3641	312
Arthropoda	Insecta	Diptera	Syrphidae	Syrphinae	Melanostoma		Angela Telfer	RRMFE2916-15	BOLD:AAB2866	pending	27-May-2015	Site 3 - South Field, forest edge	43.3705	-80.3641	312
Arthropoda	Collembola	Entomobryomorpha	Isotomidae		Parisotoma		Angela Telfer	RRBAA468-15	BOLD:AAB2869	pending	01-May-2015	Site 1 - Woodland Trail, alvar	43.379	-80.346	288
Arthropoda	Collembola	Entomobryomorpha	Isotomidae		Parisotoma		Angela Telfer	RRBAA269-15	BOLD:AAB2869	pending	01-May-2015	Site 1 - Woodland Trail, alvar	43.379	-80.346	288
Arthropoda	Collembola	Entomobryomorpha	Isotomidae		Parisotoma		Angela Telfer	RRBAA492-15	BOLD:AAB2869	pending	01-May-2015	Site 1 - Woodland Trail, alvar	43.379	-80.346	288
Arthropoda	Collembola	Entomobryomorpha	Isotomidae		Parisotoma		Angela Telfer	RRBAA266-15	BOLD:AAB2869	pending	01-May-2015	Site 1 - Woodland Trail, alvar	43.379	-80.346	288
Arthropoda	Collembola	Entomobryomorpha	Isotomidae		Parisotoma		Angela Telfer	RRBAA488-15	BOLD:AAB2869	pending	01-May-2015	Site 1 - Woodland Trail, alvar	43.379	-80.346	288
Arthropoda	Collembola	Entomobryomorpha	Isotomidae		Parisotoma		Angela Telfer	RRBAA461-15	BOLD:AAB2869	pending	01-May-2015	Site 1 - Woodland Trail, alvar	43.379	-80.346	288
Arthropoda	Collembola	Entomobryomorpha	Isotomidae		Parisotoma		Angela Telfer	RRBAA473-15	BOLD:AAB2869	pending	01-May-2015	Site 1 - Woodland Trail, alvar	43.379	-80.346	288
Arthropoda	Collembola	Entomobryomorpha	Isotomidae		Parisotoma		Angela Telfer	RRBAA211-15	BOLD:AAB2869	pending	01-May-2015	Site 1 - Woodland Trail, alvar	43.379	-80.346	288
Arthropoda	Collembola	Entomobryomorpha	Isotomidae		Parisotoma		Angela Telfer	RRBAA267-15	BOLD:AAB2869	pending	01-May-2015	Site 1 - Woodland Trail, alvar	43.379	-80.346	288
Arthropoda	Collembola	Entomobryomorpha	Isotomidae		Parisotoma		Angela Telfer	RRBAA493-15	BOLD:AAB2869	pending	01-May-2015	Site 1 - Woodland Trail, alvar	43.379	-80.346	288
Arthropoda	Collembola	Entomobryomorpha	Isotomidae		Parisotoma	Parisotoma notabilis	Angela Telfer	RRBAA247-15	BOLD:AAB2870	pending	01-May-2015	Site 1 - Woodland Trail, alvar	43.379	-80.346	288
Arthropoda	Collembola	Entomobryomorpha	Isotomidae		Parisotoma	Parisotoma notabilis	Angela Telfer	RRBAA464-15	BOLD:AAB2870	pending	01-May-2015	Site 1 - Woodland Trail, alvar	43.379	-80.346	288
Arthropoda	Arachnida	Araneae	Salticidae		Pelegrina	Pelegrina insignis	Gergin A. Blagoev	RRSPI058-15	BOLD:AAB2928	pending	25-May-2015	Site 3 - Grassy Wetland	43.391	-80.375	270
Arthropoda	Arachnida	Araneae	Salticidae		Pelegrina	Pelegrina insignis	Gergin A. Blagoev	RRSPI059-15	BOLD:AAB2928	pending	25-May-2015	Site 3 - Grassy Wetland	43.391	-80.375	270
Arthropoda	Arachnida	Araneae	Salticidae		Pelegrina	Pelegrina galathea	Gergin A. Blagoev	RRSPI229-15	BOLD:AAB2930	pending	04-Jun-2015	Site 4 - Blair Flats, unburned prairie	43.385	-80.369	264
Arthropoda	Arachnida	Araneae	Salticidae		Pelegrina	Pelegrina galathea	Gergin A. Blagoev	RRSPI230-15	BOLD:AAB2930	pending	04-Jun-2015	Site 4 - Blair Flats, unburned prairie	43.385	-80.369	264
Arthropoda	Insecta	Lepidoptera	Noctuidae	Erebinae	Catocala	Catocala cerogama	Angela Telfer	RRMFB952-15	BOLD:AAB3383	pending	07-May-2015	Site 3 - South Field, forest edge	43.3705	-80.3641	312
Arthropoda	Collembola	Symphypleona	Katiannidae		Sminthurinus	Sminthurinus elegans	Angela Telfer	RRSSA2941-15	BOLD:AAB3495	pending	31-May-2015	Site 1 - Field Edge Forest	43.374	-80.354	332
Arthropoda	Collembola	Symphypleona	Katiannidae		Sminthurinus	Sminthurinus elegans	Angela Telfer	RRSSA2960-15	BOLD:AAB3495	pending	31-May-2015	Site 1 - Field Edge Forest	43.374	-80.354	332
Arthropoda	Collembola	Symphypleona	Katiannidae		Sminthurinus	Sminthurinus elegans	Angela Telfer	RRSSA2247-15	BOLD:AAB3495	pending	31-May-2015	Site 1 - Field Edge Forest	43.374	-80.354	332
Arthropoda	Collembola	Symphypleona	Katiannidae		Sminthurinus	Sminthurinus elegans	Angela Telfer	RRSSA2951-15	BOLD:AAB3495	pending	31-May-2015	Site 1 - Field Edge Forest	43.374	-80.354	332
Arthropoda	Collembola	Symphypleona	Katiannidae		Sminthurinus	Sminthurinus elegans	Angela Telfer	RRSSA2924-15	BOLD:AAB3495	pending	31-May-2015	Site 1 - Field Edge Forest	43.374	-80.354	332
Arthropoda	Collembola	Symphypleona	Katiannidae		Sminthurinus	Sminthurinus elegans	Angela Telfer	RRSSA2179-15	BOLD:AAB3495	pending	31-May-2015	Site 1 - Field Edge Forest	43.374	-80.354	332
Arthropoda	Collembola	Symphypleona	Katiannidae		Sminthurinus	Sminthurinus elegans	Angela Telfer	RRSSA2959-15	BOLD:AAB3495	pending	31-May-2015	Site 1 - Field Edge Forest	43.374	-80.354	332
Arthropoda	Collembola	Symphypleona	Katiannidae		Sminthurinus	Sminthurinus elegans	Angela Telfer	RRSSA2963-15	BOLD:AAB3495	pending	31-May-2015	Site 1 - Field Edge Forest	43.374	-80.354	332
Arthropoda	Collembola	Symphypleona	Katiannidae		Sminthurinus	Sminthurinus elegans	Angela Telfer	RRSSA2947-15	BOLD:AAB3495	pending	31-May-2015	Site 1 - Field Edge Forest	43.374	-80.354	332
Arthropoda	Collembola	Symphypleona	Katiannidae		Sminthurinus	Sminthurinus elegans	Angela Telfer	RRSSA2950-15	BOLD:AAB3495	pending	31-May-2015	Site 1 - Field Edge Forest	43.374	-80.354	332
Arthropoda	Collembola	Symphypleona	Katiannidae		Sminthurinus	Sminthurinus elegans	Angela Telfer	RRSSA2249-15	BOLD:AAB3495	pending	31-May-2015	Site 1 - Field Edge Forest	43.374	-80.354	332
Arthropoda	Collembola	Symphypleona	Katiannidae		Sminthurinus	Sminthurinus elegans	Angela Telfer	RRSSA2958-15	BOLD:AAB3495	pending	31-May-2015	Site 1 - Field Edge Forest	43.374	-80.354	332
Arthropoda	Collembola	Symphypleona	Katiannidae		Sminthurinus	Sminthurinus elegans	Angela Telfer	RRSSA2953-15	BOLD:AAB3495	pending	31-May-2015	Site 1 - Field Edge Forest	43.374	-80.354	332
Arthropoda	Collembola	Symphypleona	Katiannidae		Sminthurinus	Sminthurinus elegans	Angela Telfer	RRSSA2243-15	BOLD:AAB3495	pending	31-May-2015	Site 1 - Field Edge Forest	43.374	-80.354	332
Arthropoda	Collembola	Symphypleona	Katiannidae		Sminthurinus	Sminthurinus elegans	Angela Telfer	RRSSA2176-15	BOLD:AAB3495	pending	31-May-2015	Site 1 - Field Edge Forest	43.374	-80.354	332
Arthropoda	Collembola	Symphypleona	Katiannidae		Sminthurinus	Sminthurinus elegans	Angela Telfer	RRSSA2954-15	BOLD:AAB3495	pending	31-May-2015	Site 1 - Field Edge Forest	43.374	-80.354	332
Arthropoda	Collembola	Symphypleona	Katiannidae		Sminthurinus	Sminthurinus elegans	Angela Telfer	RRSSA2944-15	BOLD:AAB3495	pending	31-May-2015	Site 1 - Field Edge Forest	43.374	-80.354	332
Arthropoda	Collembola	Symphypleona	Katiannidae		Sminthurinus	Sminthurinus elegans	Angela Telfer	RRSSA335-15	BOLD:AAB3495	pending	01-Jun-2015	Site 1 - Field Edge Forest	43.374	-80.354	332
Arthropoda	Collembola	Symphypleona	Katiannidae		Sminthurinus	Sminthurinus elegans	Angela Telfer	RRSSA3570-15	BOLD:AAB3495	pending	01-Jun-2015	Site 1 - Field Edge Forest	43.374	-80.354	332
Arthropoda	Collembola	Symphypleona	Katiannidae		Sminthurinus	Sminthurinus elegans	Angela Telfer	RRSSA2964-15	BOLD:AAB3495	pending	31-May-2015	Site 1 - Field Edge Forest	43.374	-80.354	332
Arthropoda	Collembola	Symphypleona	Katiannidae		Sminthurinus	Sminthurinus elegans	Angela Telfer	RRSSA2938-15	BOLD:AAB3495	pending	31-May-2015	Site 1 - Field Edge Forest	43.374	-80.354	332
Arthropoda	Collembola	Symphypleona	Katiannidae		Sminthurinus	Sminthurinus elegans	Angela Telfer	RRSSA2242-15	BOLD:AAB3495	pending	31-May-2015	Site 1 - Field Edge Forest	43.374	-80.354	332
Arthropoda	Collembola	Symphypleona	Katiannidae		Sminthurinus	Sminthurinus elegans	Angela Telfer	RRSSA2979-15	BOLD:AAB3495	pending	31-May-2015	Site 1 - Field Edge Forest	43.374	-80.354	332
Arthropoda	Collembola	Symphypleona	Katiannidae		Sminthurinus	Sminthurinus elegans	Angela Telfer	RRSSA2246-15	BOLD:AAB3495	pending	31-May-2015	Site 1 - Field Edge Forest	43.374	-80.354	332
Arthropoda	Collembola	Symphypleona	Katiannidae		Sminthurinus	Sminthurinus elegans	Angela Telfer	RRSSA2946-15	BOLD:AAB3495	pending	31-May-2015	Site 1 - Field Edge Forest	43.374	-80.354	332
Arthropoda	Collembola	Symphypleona	Katiannidae		Sminthurinus	Sminthurinus elegans	Angela Telfer	RRSSA2957-15	BOLD:AAB3495	pending	31-May-2015	Site 1 - Field Edge Forest	43.374	-80.354	332
Arthropoda	Collembola	Symphypleona	Katiannidae		Sminthurinus	Sminthurinus elegans	Angela Telfer	RRSSA2945-15	BOLD:AAB3495	pending	31-May-2015	Site 1 - Field Edge Forest	43.374	-80.354	332
Arthropoda	Collembola	Symphypleona	Katiannidae		Sminthurinus	Sminthurinus elegans	Angela Telfer	RRSSA2948-15	BOLD:AAB3495	pending	31-May-2015	Site 1 - Field Edge Forest	43.374	-80.354	332
Arthropoda	Collembola	Symphypleona	Katiannidae		Sminthurinus	Sminthurinus elegans	Angela Telfer	RRSSA2955-15	BOLD:AAB3495	pending	31-May-2015	Site 1 - Field Edge Forest	43.374	-80.354	332
Arthropoda	Collembola	Symphypleona	Katiannidae		Sminthurinus	Sminthurinus elegans	Angela Telfer	RRSSA2952-15	BOLD:AAB3495	pending	31-May-2015	Site 1 - Field Edge Forest	43.374	-80.354	332
Arthropoda	Collembola	Symphypleona	Katiannidae		Sminthurinus	Sminthurinus elegans	Angela Telfer	RRSSA2943-15	BOLD:AAB3495	pending	31-May-2015	Site 1 - Field Edge Forest	43.374	-80.354	332
Arthropoda	Collembola	Symphypleona	Katiannidae		Sminthurinus	Sminthurinus elegans	Angela Telfer	RRSSA2260-15	BOLD:AAB3495	pending	31-May-2015	Site 1 - Field Edge Forest	43.374	-80.354	332
Arthropoda	Collembola	Symphypleona	Katiannidae		Sminthurinus	Sminthurinus elegans	Angela Telfer	RRSSA2961-15	BOLD:AAB3495	pending	31-May-2015	Site 1 - Field Edge Forest	43.374	-80.354	332
Arthropoda	Collembola	Symphypleona	Katiannidae		Sminthurinus	Sminthurinus elegans	Angela Telfer	RRSSA2244-15	BOLD:AAB3495	pending	31-May-2015	Site 1 - Field Edge Forest	43.374	-80.354	332
Arthropoda	Collembola	Symphypleona	Katiannidae		Sminthurinus	Sminthurinus elegans	Angela Telfer	RRSSA2942-15	BOLD:AAB3495	pending	31-May-2015	Site 1 - Field Edge Forest	43.374	-80.354	332
Arthropoda	Collembola	Symphypleona	Katiannidae		Sminthurinus	Sminthurinus elegans	Angela Telfer	RRSSA2245-15	BOLD:AAB3495	pending	31-May-2015	Site 1 - Field Edge Forest	43.374	-80.354	332
Arthropoda	Collembola	Symphypleona	Katiannidae		Sminthurinus	Sminthurinus elegans	Angela Telfer	RRSSA2986-15	BOLD:AAB3495	pending	31-May-2015	Site 1 - Field Edge Forest	43.374	-80.354	332
Arthropoda	Collembola	Symphypleona	Katiannidae		Sminthurinus	Sminthurinus elegans	Angela Telfer	RRSSA3519-15	BOLD:AAB3495	pending	31-May-2015	Site 1 - Field Edge Forest	43.374	-80.354	332
Arthropoda	Collembola	Symphypleona	Katiannidae		Sminthurinus	Sminthurinus elegans	Angela Telfer	RRBPA029-15	BOLD:AAB3496	pending	01-May-2015	Site 4 - Blair Flats, unburned prairie	43.385	-80.369	264
Arthropoda	Insecta	Lepidoptera	Tortricidae	Tortricinae	Cochylis	Cochylis hoffmanana	Jayme E. Sones	RRMPG044-15	BOLD:AAB3571	pending	11-Jun-2015	Site 4 - Blair Flats, unburned prairie	43.385	-80.369	264
Arthropoda	Arachnida	Araneae	Philodromidae		Philodromus	Philodromus cespitum	Gergin A. Blagoev	RRMPE367-15	BOLD:AAB3836	pending	27-May-2015	Site 4 - Blair Flats, unburned prairie	43.385	-80.369	264
Arthropoda	Arachnida	Araneae	Philodromidae		Philodromus	Philodromus cespitum	Gergin A. Blagoev	RRMPG071-15	BOLD:AAB3836	pending	11-Jun-2015	Site 4 - Blair Flats, unburned prairie	43.385	-80.369	264
Arthropoda	Arachnida	Araneae	Philodromidae		Philodromus	Philodromus cespitum	Gergin A. Blagoev	RRMPE372-15	BOLD:AAB3836	pending	27-May-2015	Site 4 - Blair Flats, unburned prairie	43.385	-80.369	264
Arthropoda	Arachnida	Araneae	Philodromidae		Philodromus	Philodromus cespitum	Gergin A. Blagoev	RRMPD043-15	BOLD:AAB3836	pending	21-May-2015	Site 4 - Blair Flats, unburned prairie	43.385	-80.369	264
Arthropoda	Arachnida	Araneae	Philodromidae		Philodromus	Philodromus cespitum	Gergin A. Blagoev	RRMPE373-15	BOLD:AAB3836	pending	27-May-2015	Site 4 - Blair Flats, unburned prairie	43.385	-80.369	264
Arthropoda	Arachnida	Araneae	Philodromidae		Philodromus	Philodromus cespitum	Gergin A. Blagoev	RRMPE371-15	BOLD:AAB3836	pending	27-May-2015	Site 4 - Blair Flats, unburned prairie	43.385	-80.369	264
Arthropoda	Arachnida	Araneae	Philodromidae		Philodromus	Philodromus cespitum	Gergin A. Blagoev	RRMPC836-15	BOLD:AAB3836	pending	14-May-2015	Site 4 - Blair Flats, unburned prairie	43.385	-80.369	264
Arthropoda	Arachnida	Araneae	Philodromidae		Philodromus	Philodromus cespitum	Gergin A. Blagoev	RRSPI217-15	BOLD:AAB3836	pending	25-May-2015	Site 3 - Grassy Wetland	43.391	-80.375	270
Arthropoda	Arachnida	Araneae	Philodromidae		Philodromus	Philodromus cespitum	Gergin A. Blagoev	RRSPI316-15	BOLD:AAB3836	pending	25-May-2015	Site 3 - Grassy Wetland	43.391	-80.375	270
Arthropoda	Arachnida	Araneae	Philodromidae		Philodromus	Philodromus cespitum	Gergin A. Blagoev	RRSPI225-15	BOLD:AAB3836	pending	29-May-2015	Site 3 - Grassy Wetland	43.391	-80.375	270
Arthropoda	Arachnida	Araneae	Philodromidae		Philodromus	Philodromus cespitum	Gergin A. Blagoev	RRMPE369-15	BOLD:AAB3836	pending	27-May-2015	Site 4 - Blair Flats, unburned prairie	43.385	-80.369	264
Arthropoda	Arachnida	Araneae	Philodromidae		Philodromus	Philodromus cespitum	Gergin A. Blagoev	RRMPE370-15	BOLD:AAB3836	pending	27-May-2015	Site 4 - Blair Flats, unburned prairie	43.385	-80.369	264
Arthropoda	Arachnida	Araneae	Philodromidae		Philodromus	Philodromus cespitum	Gergin A. Blagoev	RRMPE368-15	BOLD:AAB3836	pending	27-May-2015	Site 4 - Blair Flats, unburned prairie	43.385	-80.369	264
Arthropoda	Arachnida	Araneae	Philodromidae		Philodromus	Philodromus cespitum	Gergin A. Blagoev	RRMPC835-15	BOLD:AAB3836	pending	14-May-2015	Site 4 - Blair Flats, unburned prairie	43.385	-80.369	264
Arthropoda	Insecta	Diptera	Chironomidae	Orthocladiinae	Orthocladius	Orthocladius rivulorum	Angela Telfer	RRMPB1244-15	BOLD:AAB3988	pending	07-May-2015	Site 4 - Blair Flats, unburned prairie	43.385	-80.369	264
Arthropoda	Insecta	Lepidoptera	Crambidae	Pyraustinae	Anania	Anania funebris	Angela Telfer	RRMFE3004-15	BOLD:AAB4181	pending	27-May-2015	Site 3 - South Field, forest edge	43.3705	-80.3641	312
Arthropoda	Arachnida	Araneae	Linyphiidae		Hypselistes	Hypselistes florens	Gergin A. Blagoev	RRSPI363-15	BOLD:AAB4233	pending	15-Jul-2015	Site 1 - Woodland Trail, alvar	43.3792	-80.3456	288
Arthropoda	Arachnida	Araneae	Linyphiidae		Hypselistes	Hypselistes florens	Gergin A. Blagoev	RRSPI279-15	BOLD:AAB4233	pending	07-May-2015	Around the Site 2 and Site 3	43.37	-80.364	312
Arthropoda	Arachnida	Araneae	Thomisidae		Xysticus	Xysticus emertoni	Gergin A. Blagoev	RRSPI219-15	BOLD:AAB4300	pending	25-May-2015	Site 3 - Grassy Wetland	43.391	-80.375	270
Arthropoda	Arachnida	Araneae	Thomisidae		Xysticus	Xysticus emertoni	Gergin A. Blagoev	RRSPI067-15	BOLD:AAB4300	pending	29-May-2015	Site 2 - Grassy Field	43.376	-80.375	294
Arthropoda	Arachnida	Araneae	Thomisidae		Xysticus	Xysticus emertoni	Gergin A. Blagoev	RRSPI222-15	BOLD:AAB4300	pending	29-May-2015	Site 3 - Grassy Wetland	43.391	-80.375	270
Arthropoda	Arachnida	Araneae	Thomisidae		Xysticus	Xysticus emertoni	Gergin A. Blagoev	RRSPI066-15	BOLD:AAB4300	pending	04-Jun-2015	Site 4 - Blair Flats, unburned prairie	43.385	-80.369	264
Arthropoda	Insecta	Lepidoptera	Noctuidae	Noctuinae	Eupsilia		Angela Telfer	RRSSA2506-15	BOLD:AAB4640	pending	31-May-2015	Site 1 - Field Edge Forest	43.374	-80.354	332
Arthropoda	Insecta	Lepidoptera	Noctuidae	Noctuinae	Eupsilia		Angela Telfer	RRSSA1972-15	BOLD:AAB4640	pending	25-May-2015	Site 1 - Field Edge Forest	43.374	-80.354	332
Arthropoda	Insecta	Lepidoptera	Noctuidae	Noctuinae	Eupsilia		Angela Telfer	RRSSA2508-15	BOLD:AAB4640	pending	31-May-2015	Site 1 - Field Edge Forest	43.374	-80.354	332
Arthropoda	Insecta	Diptera	Chironomidae	Chironominae	Chironomus	Chironomus maturus	Angela Telfer	RRMFG3264-15	BOLD:AAB4657	pending	11-Jun-2015	Site 3 - South Field, forest edge	43.37	-80.364	312
Arthropoda	Insecta	Diptera	Chironomidae	Chironominae	Chironomus	Chironomus maturus	Angela Telfer	RRMFA032-15	BOLD:AAB4657	pending	29-Apr-2015	Site 3 - South Field, forest edge	43.3705	-80.3641	312
Arthropoda	Insecta	Diptera	Chironomidae	Chironominae	Chironomus	Chironomus maturus	Angela Telfer	RRMFG3272-15	BOLD:AAB4657	pending	11-Jun-2015	Site 3 - South Field, forest edge	43.37	-80.364	312
Arthropoda	Insecta	Diptera	Chironomidae	Chironominae	Chironomus	Chironomus maturus	Angela Telfer	RRMFB1136-15	BOLD:AAB4657	pending	07-May-2015	Site 3 - South Field, forest edge	43.37	-80.364	312
Arthropoda	Insecta	Diptera	Chironomidae	Chironominae	Chironomus	Chironomus dilutus	Angela Telfer	RRSSA393-15	BOLD:AAB4658	pending	29-May-2015	Site 1 - Field Edge Forest	43.374	-80.354	332
Arthropoda	Insecta	Lepidoptera	Bucculatricidae	Bucculatricinae	Bucculatrix	Bucculatrix ainsliella	Angela Telfer	RRSSA1301-15	BOLD:AAB4931	pending	31-May-2015	Site 1 - Field Edge Forest	43.374	-80.354	332
Arthropoda	Insecta	Lepidoptera	Bucculatricidae	Bucculatricinae	Bucculatrix	Bucculatrix ainsliella	Angela Telfer	RRMFC663-15	BOLD:AAB4931	pending	14-May-2015	Site 3 - South Field, forest edge	43.37	-80.364	312
Arthropoda	Insecta	Lepidoptera	Bucculatricidae	Bucculatricinae	Bucculatrix	Bucculatrix ainsliella	Angela Telfer	RRMFD1626-15	BOLD:AAB4931	pending	21-May-2015	Site 3 - South Field, forest edge	43.37	-80.364	312
Arthropoda	Insecta	Lepidoptera	Bucculatricidae	Bucculatricinae	Bucculatrix	Bucculatrix ainsliella	Angela Telfer	RRSSA1294-15	BOLD:AAB4931	pending	31-May-2015	Site 1 - Field Edge Forest	43.374	-80.354	332
Arthropoda	Insecta	Lepidoptera	Bucculatricidae	Bucculatricinae	Bucculatrix	Bucculatrix ainsliella	Angela Telfer	RRSSA1292-15	BOLD:AAB4931	pending	31-May-2015	Site 1 - Field Edge Forest	43.374	-80.354	332
Arthropoda	Insecta	Lepidoptera	Bucculatricidae	Bucculatricinae	Bucculatrix	Bucculatrix ainsliella	Angela Telfer	RRMFC666-15	BOLD:AAB4931	pending	14-May-2015	Site 3 - South Field, forest edge	43.37	-80.364	312
Arthropoda	Insecta	Lepidoptera	Bucculatricidae	Bucculatricinae	Bucculatrix	Bucculatrix ainsliella	Angela Telfer	RRSSA1302-15	BOLD:AAB4931	pending	31-May-2015	Site 1 - Field Edge Forest	43.374	-80.354	332
Arthropoda	Insecta	Hymenoptera	Andrenidae	Andreninae	Andrena	Andrena barbilabris	Angela Telfer	RRMFA258-15	BOLD:AAB4998	pending	29-Apr-2015	Site 3 - South Field, forest edge	43.3705	-80.3641	312
Arthropoda	Insecta	Diptera	Syrphidae	Syrphinae	Syrphus		Angela Telfer	RRMFE2562-15	BOLD:AAB5577	pending	27-May-2015	Site 3 - South Field, forest edge	43.3705	-80.3641	312
Arthropoda	Insecta	Coleoptera	Coccinellidae	Coccinellinae	Harmonia	Harmonia axyridis	Angela Telfer	RRSSA323-15	BOLD:AAB5640	pending	29-May-2015	Site 1 - Field Edge Forest	43.374	-80.354	332
Arthropoda	Insecta	Diptera	Culicidae	Culicinae			Angela Telfer	RRSSA148-15	BOLD:AAB5696	pending	25-May-2015	Site 1 - Field Edge Forest	43.374	-80.354	332
Arthropoda	Insecta	Lepidoptera	Noctuidae	Noctuinae	Lithophane		Angela Telfer	RRSSA1974-15	BOLD:AAB5821	pending	25-May-2015	Site 1 - Field Edge Forest	43.374	-80.354	332
Arthropoda	Arachnida	Araneae	Lycosidae		Pirata	Pirata piraticus	Gergin A. Blagoev	RRSPI158-15	BOLD:AAB6784	pending	14-May-2015	Site 1 - Woodland Trail, alvar	43.379	-80.346	288
Arthropoda	Arachnida	Araneae	Lycosidae		Pirata	Pirata piraticus	Gergin A. Blagoev	RRSPI181-15	BOLD:AAB6784	pending	21-May-2015	Site 1 - Woodland Trail, alvar	43.379	-80.346	288
Arthropoda	Insecta	Hemiptera	Aphididae	Aphidinae	Aphis	Aphis middletonii	Angela Telfer	RRBAA615-15	BOLD:AAB6817	pending	01-May-2015	Site 1 - Woodland Trail, alvar	43.379	-80.346	288
Arthropoda	Insecta	Diptera	Culicidae	Culicinae	Culex	Culex territans	Angela Telfer	RRMFG3120-15	BOLD:AAB6943	pending	11-Jun-2015	Site 3 - South Field, forest edge	43.37	-80.364	312
Arthropoda	Insecta	Hymenoptera	Halictidae	Halictinae	Lasioglossum	Lasioglossum coriaceum	Angela Telfer	RRMFD547-15	BOLD:AAB7007	pending	21-May-2015	Site 3 - South Field, forest edge	43.37	-80.364	312
Arthropoda	Insecta	Diptera	Chironomidae	Chironominae	Chironomus		Angela Telfer	RRSSA2214-15	BOLD:AAB7030	pending	31-May-2015	Site 1 - Field Edge Forest	43.374	-80.354	332
Arthropoda	Insecta	Diptera	Chironomidae	Chironominae	Chironomus		Angela Telfer	RRMFG3118-15	BOLD:AAB7030	pending	11-Jun-2015	Site 3 - South Field, forest edge	43.37	-80.364	312
Arthropoda	Insecta	Diptera	Chironomidae	Chironominae	Chironomus		Angela Telfer	RRSSA202-15	BOLD:AAB7030	pending	25-May-2015	Site 1 - Field Edge Forest	43.374	-80.354	332
Arthropoda	Insecta	Diptera	Chironomidae	Chironominae	Chironomus		Angela Telfer	RRMPB135-15	BOLD:AAB7030	pending	07-May-2015	Site 4 - Blair Flats, unburned prairie	43.385	-80.369	264
Arthropoda	Insecta	Diptera	Chironomidae	Chironominae	Chironomus		Angela Telfer	RRMPC882-15	BOLD:AAB7030	pending	14-May-2015	Site 4 - Blair Flats, unburned prairie	43.385	-80.369	264
Arthropoda	Insecta	Diptera	Chironomidae	Chironominae	Chironomus		Angela Telfer	RRMPB021-15	BOLD:AAB7030	pending	07-May-2015	Site 4 - Blair Flats, unburned prairie	43.385	-80.369	264
Arthropoda	Insecta	Diptera	Chironomidae	Chironominae	Chironomus		Angela Telfer	RRMFG3108-15	BOLD:AAB7030	pending	11-Jun-2015	Site 3 - South Field, forest edge	43.37	-80.364	312
Arthropoda	Insecta	Diptera	Chironomidae	Chironominae	Chironomus		Angela Telfer	RRMPB122-15	BOLD:AAB7030	pending	07-May-2015	Site 4 - Blair Flats, unburned prairie	43.385	-80.369	264
Arthropoda	Insecta	Diptera	Chironomidae	Chironominae	Chironomus		Angela Telfer	RRMFE2707-15	BOLD:AAB7030	pending	27-May-2015	Site 3 - South Field, forest edge	43.3705	-80.3641	312
Arthropoda	Insecta	Diptera	Chironomidae	Chironominae	Chironomus		Angela Telfer	RRMFE2387-15	BOLD:AAB7030	pending	27-May-2015	Site 3 - South Field, forest edge	43.3705	-80.3641	312
Arthropoda	Insecta	Diptera	Chironomidae	Chironominae	Chironomus		Angela Telfer	RRMFG2896-15	BOLD:AAB7030	pending	11-Jun-2015	Site 3 - South Field, forest edge	43.37	-80.364	312
Arthropoda	Insecta	Diptera	Chironomidae	Chironominae	Chironomus		Angela Telfer	RRSSA534-15	BOLD:AAB7030	pending	29-May-2015	Site 1 - Field Edge Forest	43.374	-80.354	332
Arthropoda	Insecta	Diptera	Chironomidae	Chironominae	Chironomus		Angela Telfer	RRSSA454-15	BOLD:AAB7030	pending	29-May-2015	Site 1 - Field Edge Forest	43.374	-80.354	332
Arthropoda	Insecta	Diptera	Chironomidae	Chironominae	Chironomus		Angela Telfer	RRMFE1853-15	BOLD:AAB7030	pending	27-May-2015	Site 3 - South Field, forest edge	43.3705	-80.3641	312
Arthropoda	Insecta	Diptera	Chironomidae	Chironominae	Chironomus		Angela Telfer	RRMFG3115-15	BOLD:AAB7030	pending	11-Jun-2015	Site 3 - South Field, forest edge	43.37	-80.364	312
Arthropoda	Insecta	Diptera	Chironomidae	Chironominae	Chironomus		Angela Telfer	RRMFG3145-15	BOLD:AAB7030	pending	11-Jun-2015	Site 3 - South Field, forest edge	43.37	-80.364	312
Arthropoda	Insecta	Diptera	Chironomidae	Chironominae	Chironomus		Angela Telfer	RRMFG3107-15	BOLD:AAB7030	pending	11-Jun-2015	Site 3 - South Field, forest edge	43.37	-80.364	312
Arthropoda	Insecta	Diptera	Chironomidae	Chironominae	Chironomus		Angela Telfer	RRMFG3112-15	BOLD:AAB7030	pending	11-Jun-2015	Site 3 - South Field, forest edge	43.37	-80.364	312
Arthropoda	Insecta	Diptera	Chironomidae	Chironominae	Chironomus		Angela Telfer	RRMPB128-15	BOLD:AAB7030	pending	07-May-2015	Site 4 - Blair Flats, unburned prairie	43.385	-80.369	264
Arthropoda	Insecta	Diptera	Chironomidae	Chironominae	Chironomus		Angela Telfer	RRSSA1001-15	BOLD:AAB7030	pending	31-May-2015	Site 1 - Field Edge Forest	43.374	-80.354	332
Arthropoda	Insecta	Diptera	Chironomidae	Chironominae	Chironomus		Angela Telfer	RRSSA2543-15	BOLD:AAB7030	pending	31-May-2015	Site 1 - Field Edge Forest	43.374	-80.354	332
Arthropoda	Insecta	Diptera	Chironomidae	Chironominae	Chironomus		Angela Telfer	RRMFG3113-15	BOLD:AAB7030	pending	11-Jun-2015	Site 3 - South Field, forest edge	43.37	-80.364	312
Arthropoda	Insecta	Diptera	Chironomidae	Chironominae	Chironomus		Angela Telfer	RRSSA2033-15	BOLD:AAB7030	pending	25-May-2015	Site 1 - Field Edge Forest	43.374	-80.354	332
Arthropoda	Insecta	Diptera	Chironomidae	Chironominae	Chironomus		Angela Telfer	RRSSA962-15	BOLD:AAB7030	pending	29-May-2015	Site 1 - Field Edge Forest	43.374	-80.354	332
Arthropoda	Insecta	Diptera	Chironomidae	Chironominae	Chironomus		Angela Telfer	RRMFG3109-15	BOLD:AAB7030	pending	11-Jun-2015	Site 3 - South Field, forest edge	43.37	-80.364	312
Arthropoda	Insecta	Diptera	Chironomidae	Chironominae	Chironomus		Angela Telfer	RRMFD522-15	BOLD:AAB7030	pending	21-May-2015	Site 3 - South Field, forest edge	43.37	-80.364	312
Arthropoda	Insecta	Diptera	Chironomidae	Chironominae	Chironomus		Angela Telfer	RRMFG2877-15	BOLD:AAB7030	pending	11-Jun-2015	Site 3 - South Field, forest edge	43.37	-80.364	312
Arthropoda	Insecta	Diptera	Chironomidae	Chironominae	Chironomus		Angela Telfer	RRSSA1992-15	BOLD:AAB7030	pending	25-May-2015	Site 1 - Field Edge Forest	43.374	-80.354	332
Arthropoda	Insecta	Diptera	Chironomidae	Chironominae	Chironomus		Angela Telfer	RRMPB133-15	BOLD:AAB7030	pending	07-May-2015	Site 4 - Blair Flats, unburned prairie	43.385	-80.369	264
Arthropoda	Insecta	Diptera	Chironomidae	Chironominae	Chironomus		Angela Telfer	RRSSA998-15	BOLD:AAB7030	pending	31-May-2015	Site 1 - Field Edge Forest	43.374	-80.354	332
Arthropoda	Insecta	Diptera	Chironomidae	Chironominae	Chironomus		Angela Telfer	RRSSA821-15	BOLD:AAB7030	pending	29-May-2015	Site 1 - Field Edge Forest	43.374	-80.354	332
Arthropoda	Insecta	Diptera	Chironomidae	Chironominae	Chironomus		Angela Telfer	RRSSA179-15	BOLD:AAB7030	pending	25-May-2015	Site 1 - Field Edge Forest	43.374	-80.354	332
Arthropoda	Insecta	Diptera	Chironomidae	Chironominae	Chironomus		Angela Telfer	RRSSA472-15	BOLD:AAB7030	pending	29-May-2015	Site 1 - Field Edge Forest	43.374	-80.354	332
Arthropoda	Insecta	Diptera	Chironomidae	Chironominae	Chironomus		Angela Telfer	RRMPC890-15	BOLD:AAB7030	pending	14-May-2015	Site 4 - Blair Flats, unburned prairie	43.385	-80.369	264
Arthropoda	Insecta	Diptera	Chironomidae	Chironominae	Chironomus		Angela Telfer	RRMFG2875-15	BOLD:AAB7030	pending	11-Jun-2015	Site 3 - South Field, forest edge	43.37	-80.364	312
Arthropoda	Insecta	Diptera	Chironomidae	Chironominae	Chironomus		Angela Telfer	RRMFG3129-15	BOLD:AAB7030	pending	11-Jun-2015	Site 3 - South Field, forest edge	43.37	-80.364	312
Arthropoda	Insecta	Diptera	Chironomidae	Chironominae	Chironomus		Angela Telfer	RRMFC1757-15	BOLD:AAB7030	pending	14-May-2015	Site 3 - South Field, forest edge	43.37	-80.364	312
Arthropoda	Insecta	Diptera	Chironomidae	Chironominae	Chironomus		Angela Telfer	RRSSA851-15	BOLD:AAB7030	pending	29-May-2015	Site 1 - Field Edge Forest	43.374	-80.354	332
Arthropoda	Insecta	Diptera	Chironomidae	Chironominae	Chironomus		Angela Telfer	RRSSA142-15	BOLD:AAB7030	pending	25-May-2015	Site 1 - Field Edge Forest	43.374	-80.354	332
Arthropoda	Insecta	Diptera	Chironomidae	Chironominae	Chironomus		Angela Telfer	RRSSA542-15	BOLD:AAB7030	pending	29-May-2015	Site 1 - Field Edge Forest	43.374	-80.354	332
Arthropoda	Insecta	Diptera	Chironomidae	Chironominae	Chironomus		Angela Telfer	RRMFE1993-15	BOLD:AAB7030	pending	27-May-2015	Site 3 - South Field, forest edge	43.3705	-80.3641	312
Arthropoda	Insecta	Diptera	Chironomidae	Chironominae	Chironomus		Angela Telfer	RRSSA414-15	BOLD:AAB7030	pending	29-May-2015	Site 1 - Field Edge Forest	43.374	-80.354	332
Arthropoda	Insecta	Diptera	Chironomidae	Chironominae	Chironomus		Angela Telfer	RRSSA1000-15	BOLD:AAB7030	pending	31-May-2015	Site 1 - Field Edge Forest	43.374	-80.354	332
Arthropoda	Insecta	Diptera	Chironomidae	Chironominae	Chironomus		Angela Telfer	RRSSA963-15	BOLD:AAB7030	pending	29-May-2015	Site 1 - Field Edge Forest	43.374	-80.354	332
Arthropoda	Insecta	Diptera	Chironomidae	Chironominae	Chironomus		Angela Telfer	RRSSA476-15	BOLD:AAB7030	pending	29-May-2015	Site 1 - Field Edge Forest	43.374	-80.354	332
Arthropoda	Insecta	Diptera	Chironomidae	Chironominae	Chironomus		Angela Telfer	RRSSA412-15	BOLD:AAB7030	pending	29-May-2015	Site 1 - Field Edge Forest	43.374	-80.354	332
Arthropoda	Insecta	Diptera	Chironomidae	Chironominae	Chironomus		Angela Telfer	RRSSA3736-15	BOLD:AAB7030	pending	27-May-2015	Site 1 - Field Edge Forest	43.374	-80.354	332
Arthropoda	Insecta	Diptera	Chironomidae	Chironominae	Chironomus		Angela Telfer	RRSSA497-15	BOLD:AAB7030	pending	29-May-2015	Site 1 - Field Edge Forest	43.374	-80.354	332
Arthropoda	Insecta	Diptera	Chironomidae	Chironominae	Chironomus		Angela Telfer	RRMFG3117-15	BOLD:AAB7030	pending	11-Jun-2015	Site 3 - South Field, forest edge	43.37	-80.364	312
Arthropoda	Insecta	Diptera	Chironomidae	Chironominae	Chironomus		Angela Telfer	RRMPB126-15	BOLD:AAB7030	pending	07-May-2015	Site 4 - Blair Flats, unburned prairie	43.385	-80.369	264
Arthropoda	Insecta	Diptera	Chironomidae	Chironominae	Chironomus		Angela Telfer	RRSSA975-15	BOLD:AAB7030	pending	31-May-2015	Site 1 - Field Edge Forest	43.374	-80.354	332
Arthropoda	Insecta	Diptera	Chironomidae	Chironominae	Chironomus		Angela Telfer	RRSSA2227-15	BOLD:AAB7030	pending	31-May-2015	Site 1 - Field Edge Forest	43.374	-80.354	332
Arthropoda	Insecta	Hymenoptera	Vespidae	Polistinae	Polistes	Polistes dominula	Angela Telfer	RRMPC919-15	BOLD:AAB7105	pending	14-May-2015	Site 4 - Blair Flats, unburned prairie	43.385	-80.369	264
Arthropoda	Insecta	Hymenoptera	Vespidae	Polistinae	Polistes	Polistes dominula	Angela Telfer	RRMFC1669-15	BOLD:AAB7105	pending	14-May-2015	Site 3 - South Field, forest edge	43.37	-80.364	312
Arthropoda	Collembola	Poduromorpha	Neanuridae				Angela Telfer	RRBAA436-15	BOLD:AAB7286	pending	01-May-2015	Site 1 - Woodland Trail, alvar	43.379	-80.346	288
Arthropoda	Collembola	Poduromorpha	Neanuridae				Angela Telfer	RRBAA446-15	BOLD:AAB7286	pending	01-May-2015	Site 1 - Woodland Trail, alvar	43.379	-80.346	288
Arthropoda	Arachnida	Araneae	Linyphiidae		Neriene	Neriene clathrata	Gergin A. Blagoev	RRSPI366-15	BOLD:AAB7327	pending	15-Jul-2015	Site 2 - South Field, field	43.3705	-80.3641	312
Arthropoda	Arachnida	Araneae	Linyphiidae		Neriene	Neriene clathrata	Gergin A. Blagoev	RRSPI183-15	BOLD:AAB7327	pending	21-May-2015	Site 1 - Woodland Trail, alvar	43.379	-80.346	288
Arthropoda	Arachnida	Araneae	Linyphiidae		Neriene	Neriene clathrata	Gergin A. Blagoev	RRSPI214-15	BOLD:AAB7327	pending	27-May-2015	Site 1 - Woodland Trail, alvar	43.379	-80.346	288
Arthropoda	Arachnida	Araneae	Araneidae		Mangora	Mangora gibberosa	Gergin A. Blagoev	RRSPI128-15	BOLD:AAB7330	pending	29-May-2015	Site 2 - Grassy Field	43.376	-80.375	294
Arthropoda	Arachnida	Araneae	Araneidae		Mangora	Mangora gibberosa	Gergin A. Blagoev	RRSPI113-15	BOLD:AAB7330	pending	04-Jun-2015	Around the Site 2 and Site 3	43.37	-80.364	312
Arthropoda	Insecta	Diptera	Chironomidae	Orthocladiinae	Limnophyes	Limnophyes natalensis	Angela Telfer	RRMFC943-15	BOLD:AAB7361	pending	14-May-2015	Site 3 - South Field, forest edge	43.37	-80.364	312
Arthropoda	Insecta	Diptera	Chironomidae	Orthocladiinae	Limnophyes	Limnophyes natalensis	Angela Telfer	RRMFC1069-15	BOLD:AAB7361	pending	14-May-2015	Site 3 - South Field, forest edge	43.37	-80.364	312
Arthropoda	Insecta	Lepidoptera	Noctuidae	Noctuinae	Achatia	Achatia distincta	Jeremy deWaard	RRMPD598-15	BOLD:AAB7392	pending	21-May-2015	Site 4 - Blair Flats, unburned prairie	43.385	-80.369	264
Arthropoda	Insecta	Diptera	Drosophilidae	Drosophilinae	Drosophila	Drosophila falleni	Angela Telfer	RRMFG2578-15	BOLD:AAB7507	pending	11-Jun-2015	Site 3 - South Field, forest edge	43.37	-80.364	312
Arthropoda	Insecta	Diptera	Drosophilidae	Drosophilinae	Drosophila	Drosophila falleni	Angela Telfer	RRMFA066-15	BOLD:AAB7507	pending	29-Apr-2015	Site 3 - South Field, forest edge	43.3705	-80.3641	312
Arthropoda	Insecta	Diptera	Simuliidae	Simuliinae	Stegopterna		Angela Telfer	RRMFC1911-15	BOLD:AAB7514	pending	14-May-2015	Site 3 - South Field, forest edge	43.37	-80.364	312
Arthropoda	Insecta	Lepidoptera	Tortricidae	Tortricinae	Cochylis	Cochylis temerana	Angela Telfer	RRMFD484-15	BOLD:AAB7534	pending	21-May-2015	Site 3 - South Field, forest edge	43.37	-80.364	312
Arthropoda	Insecta	Lepidoptera	Tortricidae	Tortricinae	Cochylis	Cochylis temerana	Angela Telfer	RRMFD482-15	BOLD:AAB7534	pending	21-May-2015	Site 3 - South Field, forest edge	43.37	-80.364	312
Arthropoda	Insecta	Lepidoptera	Tortricidae	Tortricinae	Cochylis	Cochylis temerana	Angela Telfer	RRMFC2135-15	BOLD:AAB7534	pending	14-May-2015	Site 3 - South Field, forest edge	43.37	-80.364	312
Arthropoda	Insecta	Lepidoptera	Tortricidae	Tortricinae	Cochylis	Cochylis temerana	Angela Telfer	RRMFC2136-15	BOLD:AAB7534	pending	14-May-2015	Site 3 - South Field, forest edge	43.37	-80.364	312
Arthropoda	Arachnida	Araneae	Lycosidae		Pardosa	Pardosa saxatilis	Gergin A. Blagoev	RRSPI188-15	BOLD:AAB7667	pending	21-May-2015	Site 2 - South Field, field	43.37	-80.364	312
Arthropoda	Arachnida	Araneae	Lycosidae		Pardosa	Pardosa saxatilis	Gergin A. Blagoev	RRSPI189-15	BOLD:AAB7667	pending	21-May-2015	Site 2 - South Field, field	43.37	-80.364	312
Arthropoda	Arachnida	Araneae	Lycosidae		Pardosa	Pardosa saxatilis	Gergin A. Blagoev	RRBPA039-15	BOLD:AAB7667	pending	01-May-2015	Site 4 - Blair Flats, unburned prairie	43.385	-80.369	264
Arthropoda	Arachnida	Araneae	Lycosidae		Pardosa	Pardosa milvina	Gergin A. Blagoev	RRSPI198-15	BOLD:AAB7668	pending	14-May-2015	Site 4 - Blair Flats, unburned prairie	43.385	-80.369	264
Arthropoda	Arachnida	Araneae	Lycosidae		Pardosa	Pardosa milvina	Gergin A. Blagoev	RRSPI197-15	BOLD:AAB7668	pending	14-May-2015	Site 4 - Blair Flats, unburned prairie	43.385	-80.369	264
Arthropoda	Arachnida	Araneae	Lycosidae		Pardosa	Pardosa milvina	Gergin A. Blagoev	RRSPI202-15	BOLD:AAB7668	pending	21-May-2015	Site 4 - Blair Flats, unburned prairie	43.385	-80.369	264
Arthropoda	Insecta	Diptera	Simuliidae	Simuliinae	Simulium		Angela Telfer	RRMFC1926-15	BOLD:AAB7749	pending	14-May-2015	Site 3 - South Field, forest edge	43.37	-80.364	312
Arthropoda	Insecta	Diptera	Chironomidae	Orthocladiinae	Orthocladius	Orthocladius oliveri	Angela Telfer	RRMPB3417-15	BOLD:AAB7872	pending	07-May-2015	Site 4 - Blair Flats, unburned prairie	43.385	-80.369	264
Arthropoda	Insecta	Diptera	Chironomidae	Orthocladiinae	Orthocladius	Orthocladius oliveri	Angela Telfer	RRMPA813-15	BOLD:AAB7872	pending	29-Apr-2015	Site 4 - Blair Flats, unburned prairie	43.3854	-80.369	264
Arthropoda	Insecta	Diptera	Chironomidae	Orthocladiinae	Orthocladius	Orthocladius oliveri	Angela Telfer	RRMPB4103-15	BOLD:AAB7872	pending	07-May-2015	Site 4 - Blair Flats, unburned prairie	43.385	-80.369	264
Arthropoda	Insecta	Diptera	Chironomidae	Orthocladiinae	Orthocladius	Orthocladius oliveri	Angela Telfer	RRMPA050-15	BOLD:AAB7872	pending	29-Apr-2015	Site 4 - Blair Flats, unburned prairie	43.3854	-80.369	264
Arthropoda	Insecta	Diptera	Chironomidae	Orthocladiinae	Orthocladius	Orthocladius oliveri	Angela Telfer	RRMPB3510-15	BOLD:AAB7872	pending	07-May-2015	Site 4 - Blair Flats, unburned prairie	43.385	-80.369	264
Arthropoda	Insecta	Diptera	Chironomidae	Orthocladiinae	Orthocladius	Orthocladius oliveri	Angela Telfer	RRMPA759-15	BOLD:AAB7872	pending	29-Apr-2015	Site 4 - Blair Flats, unburned prairie	43.3854	-80.369	264
Arthropoda	Insecta	Diptera	Chironomidae	Orthocladiinae	Orthocladius	Orthocladius oliveri	Angela Telfer	RRMPB1149-15	BOLD:AAB7872	pending	07-May-2015	Site 4 - Blair Flats, unburned prairie	43.385	-80.369	264
Arthropoda	Insecta	Diptera	Chironomidae	Orthocladiinae	Orthocladius	Orthocladius oliveri	Angela Telfer	RRMPB3134-15	BOLD:AAB7872	pending	07-May-2015	Site 4 - Blair Flats, unburned prairie	43.385	-80.369	264
Arthropoda	Insecta	Diptera	Chironomidae	Orthocladiinae	Orthocladius	Orthocladius oliveri	Angela Telfer	RRMPB4162-15	BOLD:AAB7872	pending	07-May-2015	Site 4 - Blair Flats, unburned prairie	43.385	-80.369	264
Arthropoda	Insecta	Diptera	Chironomidae	Orthocladiinae	Orthocladius	Orthocladius oliveri	Angela Telfer	RRMPB2717-15	BOLD:AAB7872	pending	07-May-2015	Site 4 - Blair Flats, unburned prairie	43.385	-80.369	264
Arthropoda	Insecta	Diptera	Chironomidae	Orthocladiinae	Orthocladius	Orthocladius oliveri	Angela Telfer	RRMPB2916-15	BOLD:AAB7872	pending	07-May-2015	Site 4 - Blair Flats, unburned prairie	43.385	-80.369	264
Arthropoda	Insecta	Diptera	Chironomidae	Orthocladiinae	Orthocladius	Orthocladius oliveri	Angela Telfer	RRMPB2871-15	BOLD:AAB7872	pending	07-May-2015	Site 4 - Blair Flats, unburned prairie	43.385	-80.369	264
Arthropoda	Insecta	Diptera	Chironomidae	Orthocladiinae	Orthocladius	Orthocladius oliveri	Angela Telfer	RRMPA592-15	BOLD:AAB7872	pending	29-Apr-2015	Site 4 - Blair Flats, unburned prairie	43.3854	-80.369	264
Arthropoda	Insecta	Diptera	Chironomidae	Orthocladiinae	Orthocladius	Orthocladius oliveri	Angela Telfer	RRMPA145-15	BOLD:AAB7872	pending	29-Apr-2015	Site 4 - Blair Flats, unburned prairie	43.3854	-80.369	264
Arthropoda	Insecta	Diptera	Chironomidae	Orthocladiinae	Orthocladius	Orthocladius oliveri	Angela Telfer	RRMPB3933-15	BOLD:AAB7872	pending	07-May-2015	Site 4 - Blair Flats, unburned prairie	43.385	-80.369	264
Arthropoda	Insecta	Diptera	Chironomidae	Orthocladiinae	Orthocladius	Orthocladius oliveri	Angela Telfer	RRMPB045-15	BOLD:AAB7872	pending	07-May-2015	Site 4 - Blair Flats, unburned prairie	43.385	-80.369	264
Arthropoda	Insecta	Diptera	Chironomidae	Orthocladiinae	Orthocladius	Orthocladius oliveri	Angela Telfer	RRMPA485-15	BOLD:AAB7872	pending	29-Apr-2015	Site 4 - Blair Flats, unburned prairie	43.3854	-80.369	264
Arthropoda	Insecta	Diptera	Chironomidae	Orthocladiinae	Orthocladius	Orthocladius oliveri	Angela Telfer	RRMPB1118-15	BOLD:AAB7872	pending	07-May-2015	Site 4 - Blair Flats, unburned prairie	43.385	-80.369	264
Arthropoda	Insecta	Diptera	Chironomidae	Orthocladiinae	Orthocladius	Orthocladius oliveri	Angela Telfer	RRMPA266-15	BOLD:AAB7872	pending	29-Apr-2015	Site 4 - Blair Flats, unburned prairie	43.3854	-80.369	264
Arthropoda	Insecta	Diptera	Chironomidae	Orthocladiinae	Orthocladius	Orthocladius oliveri	Angela Telfer	RRMPB2716-15	BOLD:AAB7872	pending	07-May-2015	Site 4 - Blair Flats, unburned prairie	43.385	-80.369	264
Arthropoda	Insecta	Diptera	Chironomidae	Orthocladiinae	Orthocladius	Orthocladius oliveri	Angela Telfer	RRMPA296-15	BOLD:AAB7872	pending	29-Apr-2015	Site 4 - Blair Flats, unburned prairie	43.3854	-80.369	264
Arthropoda	Insecta	Diptera	Chironomidae	Orthocladiinae	Orthocladius	Orthocladius oliveri	Angela Telfer	RRMPA435-15	BOLD:AAB7872	pending	29-Apr-2015	Site 4 - Blair Flats, unburned prairie	43.3854	-80.369	264
Arthropoda	Insecta	Diptera	Chironomidae	Orthocladiinae	Orthocladius	Orthocladius oliveri	Angela Telfer	RRMPB1438-15	BOLD:AAB7872	pending	07-May-2015	Site 4 - Blair Flats, unburned prairie	43.385	-80.369	264
Arthropoda	Insecta	Diptera	Chironomidae	Orthocladiinae	Orthocladius	Orthocladius oliveri	Angela Telfer	RRMPA374-15	BOLD:AAB7872	pending	29-Apr-2015	Site 4 - Blair Flats, unburned prairie	43.3854	-80.369	264
Arthropoda	Insecta	Diptera	Chironomidae	Orthocladiinae	Orthocladius	Orthocladius oliveri	Angela Telfer	RRMPB4030-15	BOLD:AAB7872	pending	07-May-2015	Site 4 - Blair Flats, unburned prairie	43.385	-80.369	264
Arthropoda	Insecta	Diptera	Chironomidae	Orthocladiinae	Orthocladius	Orthocladius oliveri	Angela Telfer	RRMPB509-15	BOLD:AAB7872	pending	07-May-2015	Site 4 - Blair Flats, unburned prairie	43.385	-80.369	264
Arthropoda	Insecta	Diptera	Chironomidae	Orthocladiinae	Orthocladius	Orthocladius oliveri	Angela Telfer	RRMPB3275-15	BOLD:AAB7872	pending	07-May-2015	Site 4 - Blair Flats, unburned prairie	43.385	-80.369	264
Arthropoda	Insecta	Diptera	Chironomidae	Orthocladiinae	Orthocladius	Orthocladius oliveri	Angela Telfer	RRMPB1553-15	BOLD:AAB7872	pending	07-May-2015	Site 4 - Blair Flats, unburned prairie	43.385	-80.369	264
Arthropoda	Insecta	Diptera	Chironomidae	Orthocladiinae	Orthocladius	Orthocladius oliveri	Angela Telfer	RRMPB2759-15	BOLD:AAB7872	pending	07-May-2015	Site 4 - Blair Flats, unburned prairie	43.385	-80.369	264
Arthropoda	Insecta	Diptera	Chironomidae	Orthocladiinae	Orthocladius	Orthocladius oliveri	Angela Telfer	RRMPA480-15	BOLD:AAB7872	pending	29-Apr-2015	Site 4 - Blair Flats, unburned prairie	43.3854	-80.369	264
Arthropoda	Insecta	Diptera	Chironomidae	Orthocladiinae	Orthocladius	Orthocladius oliveri	Angela Telfer	RRMPB1374-15	BOLD:AAB7872	pending	07-May-2015	Site 4 - Blair Flats, unburned prairie	43.385	-80.369	264
Arthropoda	Insecta	Diptera	Chironomidae	Orthocladiinae	Orthocladius	Orthocladius oliveri	Angela Telfer	RRMPB058-15	BOLD:AAB7872	pending	07-May-2015	Site 4 - Blair Flats, unburned prairie	43.385	-80.369	264
Arthropoda	Insecta	Diptera	Chironomidae	Orthocladiinae	Orthocladius	Orthocladius oliveri	Angela Telfer	RRMPA282-15	BOLD:AAB7872	pending	29-Apr-2015	Site 4 - Blair Flats, unburned prairie	43.3854	-80.369	264
Arthropoda	Insecta	Diptera	Chironomidae	Orthocladiinae	Orthocladius	Orthocladius oliveri	Angela Telfer	RRMPB3548-15	BOLD:AAB7872	pending	07-May-2015	Site 4 - Blair Flats, unburned prairie	43.385	-80.369	264
Arthropoda	Insecta	Diptera	Chironomidae	Orthocladiinae	Orthocladius	Orthocladius oliveri	Angela Telfer	RRMPA754-15	BOLD:AAB7872	pending	29-Apr-2015	Site 4 - Blair Flats, unburned prairie	43.3854	-80.369	264
Arthropoda	Insecta	Diptera	Chironomidae	Orthocladiinae	Orthocladius	Orthocladius oliveri	Angela Telfer	RRMPB2699-15	BOLD:AAB7872	pending	07-May-2015	Site 4 - Blair Flats, unburned prairie	43.385	-80.369	264
Arthropoda	Insecta	Diptera	Chironomidae	Orthocladiinae	Orthocladius	Orthocladius oliveri	Angela Telfer	RRMPA261-15	BOLD:AAB7872	pending	29-Apr-2015	Site 4 - Blair Flats, unburned prairie	43.3854	-80.369	264
Arthropoda	Insecta	Diptera	Chironomidae	Orthocladiinae	Orthocladius	Orthocladius oliveri	Angela Telfer	RRMPB4022-15	BOLD:AAB7872	pending	07-May-2015	Site 4 - Blair Flats, unburned prairie	43.385	-80.369	264
Arthropoda	Insecta	Diptera	Chironomidae	Orthocladiinae	Orthocladius	Orthocladius oliveri	Angela Telfer	RRMPB2242-15	BOLD:AAB7872	pending	07-May-2015	Site 4 - Blair Flats, unburned prairie	43.385	-80.369	264
Arthropoda	Insecta	Diptera	Chironomidae	Orthocladiinae	Orthocladius	Orthocladius oliveri	Angela Telfer	RRMPA664-15	BOLD:AAB7872	pending	29-Apr-2015	Site 4 - Blair Flats, unburned prairie	43.3854	-80.369	264
Arthropoda	Insecta	Diptera	Chironomidae	Orthocladiinae	Orthocladius	Orthocladius oliveri	Angela Telfer	RRMPA255-15	BOLD:AAB7872	pending	29-Apr-2015	Site 4 - Blair Flats, unburned prairie	43.3854	-80.369	264
Arthropoda	Insecta	Diptera	Chironomidae	Orthocladiinae	Orthocladius	Orthocladius oliveri	Angela Telfer	RRMPB262-15	BOLD:AAB7872	pending	07-May-2015	Site 4 - Blair Flats, unburned prairie	43.385	-80.369	264
Arthropoda	Insecta	Diptera	Chironomidae	Orthocladiinae	Orthocladius	Orthocladius oliveri	Angela Telfer	RRMPB3440-15	BOLD:AAB7872	pending	07-May-2015	Site 4 - Blair Flats, unburned prairie	43.385	-80.369	264
Arthropoda	Insecta	Diptera	Chironomidae	Orthocladiinae	Orthocladius	Orthocladius oliveri	Angela Telfer	RRMPB2467-15	BOLD:AAB7872	pending	07-May-2015	Site 4 - Blair Flats, unburned prairie	43.385	-80.369	264
Arthropoda	Insecta	Diptera	Chironomidae	Orthocladiinae	Orthocladius	Orthocladius oliveri	Angela Telfer	RRMPB4031-15	BOLD:AAB7872	pending	07-May-2015	Site 4 - Blair Flats, unburned prairie	43.385	-80.369	264
Arthropoda	Insecta	Diptera	Chironomidae	Orthocladiinae	Orthocladius	Orthocladius oliveri	Angela Telfer	RRMPA645-15	BOLD:AAB7872	pending	29-Apr-2015	Site 4 - Blair Flats, unburned prairie	43.3854	-80.369	264
Arthropoda	Insecta	Diptera	Chironomidae	Orthocladiinae	Orthocladius	Orthocladius oliveri	Angela Telfer	RRMPB1660-15	BOLD:AAB7872	pending	07-May-2015	Site 4 - Blair Flats, unburned prairie	43.385	-80.369	264
Arthropoda	Insecta	Diptera	Chironomidae	Orthocladiinae	Orthocladius	Orthocladius oliveri	Angela Telfer	RRMPA343-15	BOLD:AAB7872	pending	29-Apr-2015	Site 4 - Blair Flats, unburned prairie	43.3854	-80.369	264
Arthropoda	Insecta	Diptera	Chironomidae	Orthocladiinae	Orthocladius	Orthocladius oliveri	Angela Telfer	RRMPB3225-15	BOLD:AAB7872	pending	07-May-2015	Site 4 - Blair Flats, unburned prairie	43.385	-80.369	264
Arthropoda	Insecta	Diptera	Chironomidae	Orthocladiinae	Orthocladius	Orthocladius oliveri	Angela Telfer	RRMPB2839-15	BOLD:AAB7872	pending	07-May-2015	Site 4 - Blair Flats, unburned prairie	43.385	-80.369	264
Arthropoda	Insecta	Diptera	Chironomidae	Orthocladiinae	Orthocladius	Orthocladius oliveri	Angela Telfer	RRMPA221-15	BOLD:AAB7872	pending	29-Apr-2015	Site 4 - Blair Flats, unburned prairie	43.3854	-80.369	264
Arthropoda	Insecta	Diptera	Chironomidae	Orthocladiinae	Orthocladius	Orthocladius oliveri	Angela Telfer	RRMPB1479-15	BOLD:AAB7872	pending	07-May-2015	Site 4 - Blair Flats, unburned prairie	43.385	-80.369	264
Arthropoda	Insecta	Diptera	Chironomidae	Orthocladiinae	Orthocladius	Orthocladius oliveri	Angela Telfer	RRMPA712-15	BOLD:AAB7872	pending	29-Apr-2015	Site 4 - Blair Flats, unburned prairie	43.3854	-80.369	264
Arthropoda	Insecta	Diptera	Chironomidae	Orthocladiinae	Orthocladius	Orthocladius oliveri	Angela Telfer	RRMPB3084-15	BOLD:AAB7872	pending	07-May-2015	Site 4 - Blair Flats, unburned prairie	43.385	-80.369	264
Arthropoda	Insecta	Diptera	Chironomidae	Orthocladiinae	Orthocladius	Orthocladius oliveri	Angela Telfer	RRMPB1238-15	BOLD:AAB7872	pending	07-May-2015	Site 4 - Blair Flats, unburned prairie	43.385	-80.369	264
Arthropoda	Insecta	Diptera	Chironomidae	Orthocladiinae	Orthocladius	Orthocladius oliveri	Angela Telfer	RRMPB3819-15	BOLD:AAB7872	pending	07-May-2015	Site 4 - Blair Flats, unburned prairie	43.385	-80.369	264
Arthropoda	Insecta	Diptera	Chironomidae	Orthocladiinae	Orthocladius	Orthocladius oliveri	Angela Telfer	RRMPA177-15	BOLD:AAB7872	pending	29-Apr-2015	Site 4 - Blair Flats, unburned prairie	43.3854	-80.369	264
Arthropoda	Insecta	Diptera	Chironomidae	Orthocladiinae	Orthocladius	Orthocladius oliveri	Angela Telfer	RRMPA646-15	BOLD:AAB7872	pending	29-Apr-2015	Site 4 - Blair Flats, unburned prairie	43.3854	-80.369	264
Arthropoda	Insecta	Diptera	Chironomidae	Orthocladiinae	Orthocladius	Orthocladius oliveri	Angela Telfer	RRMPA023-15	BOLD:AAB7872	pending	29-Apr-2015	Site 4 - Blair Flats, unburned prairie	43.3854	-80.369	264
Arthropoda	Insecta	Diptera	Chironomidae	Orthocladiinae	Orthocladius	Orthocladius oliveri	Angela Telfer	RRMPB2078-15	BOLD:AAB7872	pending	07-May-2015	Site 4 - Blair Flats, unburned prairie	43.385	-80.369	264
Arthropoda	Insecta	Diptera	Chironomidae	Orthocladiinae	Orthocladius	Orthocladius oliveri	Angela Telfer	RRMPA273-15	BOLD:AAB7872	pending	29-Apr-2015	Site 4 - Blair Flats, unburned prairie	43.3854	-80.369	264
Arthropoda	Insecta	Diptera	Chironomidae	Orthocladiinae	Orthocladius	Orthocladius oliveri	Angela Telfer	RRMPB4025-15	BOLD:AAB7872	pending	07-May-2015	Site 4 - Blair Flats, unburned prairie	43.385	-80.369	264
Arthropoda	Insecta	Diptera	Chironomidae	Orthocladiinae	Orthocladius	Orthocladius oliveri	Angela Telfer	RRMPA393-15	BOLD:AAB7872	pending	29-Apr-2015	Site 4 - Blair Flats, unburned prairie	43.3854	-80.369	264
Arthropoda	Insecta	Diptera	Chironomidae	Orthocladiinae	Orthocladius	Orthocladius oliveri	Angela Telfer	RRMPB1677-15	BOLD:AAB7872	pending	07-May-2015	Site 4 - Blair Flats, unburned prairie	43.385	-80.369	264
Arthropoda	Insecta	Diptera	Chironomidae	Orthocladiinae	Orthocladius	Orthocladius oliveri	Angela Telfer	RRMPB3356-15	BOLD:AAB7872	pending	07-May-2015	Site 4 - Blair Flats, unburned prairie	43.385	-80.369	264
Arthropoda	Insecta	Diptera	Chironomidae	Orthocladiinae	Orthocladius	Orthocladius oliveri	Angela Telfer	RRMPA382-15	BOLD:AAB7872	pending	29-Apr-2015	Site 4 - Blair Flats, unburned prairie	43.3854	-80.369	264
Arthropoda	Insecta	Diptera	Chironomidae	Orthocladiinae	Orthocladius	Orthocladius oliveri	Angela Telfer	RRMPB3845-15	BOLD:AAB7872	pending	07-May-2015	Site 4 - Blair Flats, unburned prairie	43.385	-80.369	264
Arthropoda	Insecta	Diptera	Chironomidae	Orthocladiinae	Orthocladius	Orthocladius oliveri	Angela Telfer	RRMPA270-15	BOLD:AAB7872	pending	29-Apr-2015	Site 4 - Blair Flats, unburned prairie	43.3854	-80.369	264
Arthropoda	Insecta	Diptera	Chironomidae	Orthocladiinae	Orthocladius	Orthocladius oliveri	Angela Telfer	RRMPA165-15	BOLD:AAB7872	pending	29-Apr-2015	Site 4 - Blair Flats, unburned prairie	43.3854	-80.369	264
Arthropoda	Insecta	Diptera	Chironomidae	Orthocladiinae	Orthocladius	Orthocladius oliveri	Angela Telfer	RRMPB4169-15	BOLD:AAB7872	pending	07-May-2015	Site 4 - Blair Flats, unburned prairie	43.385	-80.369	264
Arthropoda	Insecta	Diptera	Chironomidae	Orthocladiinae	Orthocladius	Orthocladius oliveri	Angela Telfer	RRMPB2325-15	BOLD:AAB7872	pending	07-May-2015	Site 4 - Blair Flats, unburned prairie	43.385	-80.369	264
Arthropoda	Insecta	Diptera	Chironomidae	Orthocladiinae	Orthocladius	Orthocladius oliveri	Angela Telfer	RRMPB3020-15	BOLD:AAB7872	pending	07-May-2015	Site 4 - Blair Flats, unburned prairie	43.385	-80.369	264
Arthropoda	Insecta	Diptera	Chironomidae	Orthocladiinae	Orthocladius	Orthocladius oliveri	Angela Telfer	RRMPA334-15	BOLD:AAB7872	pending	29-Apr-2015	Site 4 - Blair Flats, unburned prairie	43.3854	-80.369	264
Arthropoda	Insecta	Diptera	Chironomidae	Orthocladiinae	Orthocladius	Orthocladius oliveri	Angela Telfer	RRMPA208-15	BOLD:AAB7872	pending	29-Apr-2015	Site 4 - Blair Flats, unburned prairie	43.3854	-80.369	264
Arthropoda	Insecta	Diptera	Chironomidae	Orthocladiinae	Orthocladius	Orthocladius oliveri	Angela Telfer	RRMPB2493-15	BOLD:AAB7872	pending	07-May-2015	Site 4 - Blair Flats, unburned prairie	43.385	-80.369	264
Arthropoda	Insecta	Diptera	Chironomidae	Orthocladiinae	Orthocladius	Orthocladius oliveri	Angela Telfer	RRMPB2873-15	BOLD:AAB7872	pending	07-May-2015	Site 4 - Blair Flats, unburned prairie	43.385	-80.369	264
Arthropoda	Insecta	Diptera	Chironomidae	Orthocladiinae	Orthocladius	Orthocladius oliveri	Angela Telfer	RRMPB3344-15	BOLD:AAB7872	pending	07-May-2015	Site 4 - Blair Flats, unburned prairie	43.385	-80.369	264
Arthropoda	Insecta	Diptera	Chironomidae	Orthocladiinae	Orthocladius	Orthocladius oliveri	Angela Telfer	RRMPA615-15	BOLD:AAB7872	pending	29-Apr-2015	Site 4 - Blair Flats, unburned prairie	43.3854	-80.369	264
Arthropoda	Insecta	Diptera	Chironomidae	Orthocladiinae	Orthocladius	Orthocladius oliveri	Angela Telfer	RRMPA676-15	BOLD:AAB7872	pending	29-Apr-2015	Site 4 - Blair Flats, unburned prairie	43.3854	-80.369	264
Arthropoda	Insecta	Diptera	Chironomidae	Orthocladiinae	Orthocladius	Orthocladius oliveri	Angela Telfer	RRMPA081-15	BOLD:AAB7872	pending	29-Apr-2015	Site 4 - Blair Flats, unburned prairie	43.3854	-80.369	264
Arthropoda	Insecta	Diptera	Chironomidae	Orthocladiinae	Orthocladius	Orthocladius oliveri	Angela Telfer	RRMPB4001-15	BOLD:AAB7872	pending	07-May-2015	Site 4 - Blair Flats, unburned prairie	43.385	-80.369	264
Arthropoda	Insecta	Diptera	Chironomidae	Orthocladiinae	Orthocladius	Orthocladius oliveri	Angela Telfer	RRMPB3118-15	BOLD:AAB7872	pending	07-May-2015	Site 4 - Blair Flats, unburned prairie	43.385	-80.369	264
Arthropoda	Insecta	Diptera	Chironomidae	Orthocladiinae	Orthocladius	Orthocladius oliveri	Angela Telfer	RRMPA778-15	BOLD:AAB7872	pending	29-Apr-2015	Site 4 - Blair Flats, unburned prairie	43.3854	-80.369	264
Arthropoda	Insecta	Diptera	Chironomidae	Orthocladiinae	Orthocladius	Orthocladius oliveri	Angela Telfer	RRMPB4100-15	BOLD:AAB7872	pending	07-May-2015	Site 4 - Blair Flats, unburned prairie	43.385	-80.369	264
Arthropoda	Insecta	Diptera	Chironomidae	Orthocladiinae	Orthocladius	Orthocladius oliveri	Angela Telfer	RRMPA817-15	BOLD:AAB7872	pending	29-Apr-2015	Site 4 - Blair Flats, unburned prairie	43.3854	-80.369	264
Arthropoda	Insecta	Diptera	Chironomidae	Orthocladiinae	Orthocladius	Orthocladius oliveri	Angela Telfer	RRMPB3802-15	BOLD:AAB7872	pending	07-May-2015	Site 4 - Blair Flats, unburned prairie	43.385	-80.369	264
Arthropoda	Insecta	Diptera	Chironomidae	Orthocladiinae	Orthocladius	Orthocladius oliveri	Angela Telfer	RRMPA751-15	BOLD:AAB7872	pending	29-Apr-2015	Site 4 - Blair Flats, unburned prairie	43.3854	-80.369	264
Arthropoda	Insecta	Diptera	Chironomidae	Orthocladiinae	Orthocladius	Orthocladius oliveri	Angela Telfer	RRMPB3896-15	BOLD:AAB7872	pending	07-May-2015	Site 4 - Blair Flats, unburned prairie	43.385	-80.369	264
Arthropoda	Insecta	Diptera	Chironomidae	Orthocladiinae	Orthocladius	Orthocladius oliveri	Angela Telfer	RRMPA072-15	BOLD:AAB7872	pending	29-Apr-2015	Site 4 - Blair Flats, unburned prairie	43.3854	-80.369	264
Arthropoda	Insecta	Diptera	Chironomidae	Orthocladiinae	Orthocladius	Orthocladius oliveri	Angela Telfer	RRMPA663-15	BOLD:AAB7872	pending	29-Apr-2015	Site 4 - Blair Flats, unburned prairie	43.3854	-80.369	264
Arthropoda	Insecta	Diptera	Chironomidae	Orthocladiinae	Orthocladius	Orthocladius oliveri	Angela Telfer	RRMPA545-15	BOLD:AAB7872	pending	29-Apr-2015	Site 4 - Blair Flats, unburned prairie	43.3854	-80.369	264
Arthropoda	Insecta	Diptera	Chironomidae	Orthocladiinae	Orthocladius	Orthocladius oliveri	Angela Telfer	RRMPA514-15	BOLD:AAB7872	pending	29-Apr-2015	Site 4 - Blair Flats, unburned prairie	43.3854	-80.369	264
Arthropoda	Insecta	Diptera	Chironomidae	Orthocladiinae	Orthocladius	Orthocladius oliveri	Angela Telfer	RRMPB4055-15	BOLD:AAB7872	pending	07-May-2015	Site 4 - Blair Flats, unburned prairie	43.385	-80.369	264
Arthropoda	Insecta	Diptera	Chironomidae	Orthocladiinae	Orthocladius	Orthocladius oliveri	Angela Telfer	RRMPA427-15	BOLD:AAB7872	pending	29-Apr-2015	Site 4 - Blair Flats, unburned prairie	43.3854	-80.369	264
Arthropoda	Insecta	Diptera	Chironomidae	Orthocladiinae	Orthocladius	Orthocladius oliveri	Angela Telfer	RRMPB2604-15	BOLD:AAB7872	pending	07-May-2015	Site 4 - Blair Flats, unburned prairie	43.385	-80.369	264
Arthropoda	Insecta	Diptera	Chironomidae	Orthocladiinae	Orthocladius	Orthocladius oliveri	Angela Telfer	RRMPB3122-15	BOLD:AAB7872	pending	07-May-2015	Site 4 - Blair Flats, unburned prairie	43.385	-80.369	264
Arthropoda	Insecta	Diptera	Chironomidae	Orthocladiinae	Orthocladius	Orthocladius oliveri	Angela Telfer	RRMPA179-15	BOLD:AAB7872	pending	29-Apr-2015	Site 4 - Blair Flats, unburned prairie	43.3854	-80.369	264
Arthropoda	Insecta	Diptera	Chironomidae	Orthocladiinae	Orthocladius	Orthocladius oliveri	Angela Telfer	RRMPB3783-15	BOLD:AAB7872	pending	07-May-2015	Site 4 - Blair Flats, unburned prairie	43.385	-80.369	264
Arthropoda	Insecta	Diptera	Chironomidae	Orthocladiinae	Orthocladius	Orthocladius oliveri	Angela Telfer	RRMPA192-15	BOLD:AAB7872	pending	29-Apr-2015	Site 4 - Blair Flats, unburned prairie	43.3854	-80.369	264
Arthropoda	Insecta	Diptera	Chironomidae	Orthocladiinae	Orthocladius	Orthocladius oliveri	Angela Telfer	RRMPA453-15	BOLD:AAB7872	pending	29-Apr-2015	Site 4 - Blair Flats, unburned prairie	43.3854	-80.369	264
Arthropoda	Insecta	Diptera	Chironomidae	Orthocladiinae	Orthocladius	Orthocladius oliveri	Angela Telfer	RRMPB2337-15	BOLD:AAB7872	pending	07-May-2015	Site 4 - Blair Flats, unburned prairie	43.385	-80.369	264
Arthropoda	Insecta	Diptera	Chironomidae	Orthocladiinae	Orthocladius	Orthocladius oliveri	Angela Telfer	RRMPB1947-15	BOLD:AAB7872	pending	07-May-2015	Site 4 - Blair Flats, unburned prairie	43.385	-80.369	264
Arthropoda	Insecta	Diptera	Chironomidae	Orthocladiinae	Orthocladius	Orthocladius oliveri	Angela Telfer	RRMPB1414-15	BOLD:AAB7872	pending	07-May-2015	Site 4 - Blair Flats, unburned prairie	43.385	-80.369	264
Arthropoda	Insecta	Diptera	Chironomidae	Orthocladiinae	Orthocladius	Orthocladius oliveri	Angela Telfer	RRMPB4092-15	BOLD:AAB7872	pending	07-May-2015	Site 4 - Blair Flats, unburned prairie	43.385	-80.369	264
Arthropoda	Insecta	Diptera	Chironomidae	Orthocladiinae	Orthocladius	Orthocladius oliveri	Angela Telfer	RRMPB3855-15	BOLD:AAB7872	pending	07-May-2015	Site 4 - Blair Flats, unburned prairie	43.385	-80.369	264
Arthropoda	Insecta	Diptera	Chironomidae	Orthocladiinae	Orthocladius	Orthocladius oliveri	Angela Telfer	RRMPB4088-15	BOLD:AAB7872	pending	07-May-2015	Site 4 - Blair Flats, unburned prairie	43.385	-80.369	264
Arthropoda	Insecta	Diptera	Chironomidae	Orthocladiinae	Orthocladius	Orthocladius oliveri	Angela Telfer	RRMPB2503-15	BOLD:AAB7872	pending	07-May-2015	Site 4 - Blair Flats, unburned prairie	43.385	-80.369	264
Arthropoda	Insecta	Diptera	Chironomidae	Orthocladiinae	Orthocladius	Orthocladius oliveri	Angela Telfer	RRMPA543-15	BOLD:AAB7872	pending	29-Apr-2015	Site 4 - Blair Flats, unburned prairie	43.3854	-80.369	264
Arthropoda	Insecta	Diptera	Chironomidae	Orthocladiinae	Orthocladius	Orthocladius oliveri	Angela Telfer	RRMPB2397-15	BOLD:AAB7872	pending	07-May-2015	Site 4 - Blair Flats, unburned prairie	43.385	-80.369	264
Arthropoda	Insecta	Diptera	Chironomidae	Orthocladiinae	Orthocladius	Orthocladius oliveri	Angela Telfer	RRMPB3146-15	BOLD:AAB7872	pending	07-May-2015	Site 4 - Blair Flats, unburned prairie	43.385	-80.369	264
Arthropoda	Insecta	Diptera	Chironomidae	Orthocladiinae	Orthocladius	Orthocladius oliveri	Angela Telfer	RRMPA450-15	BOLD:AAB7872	pending	29-Apr-2015	Site 4 - Blair Flats, unburned prairie	43.3854	-80.369	264
Arthropoda	Insecta	Diptera	Chironomidae	Orthocladiinae	Orthocladius	Orthocladius oliveri	Angela Telfer	RRMPA248-15	BOLD:AAB7872	pending	29-Apr-2015	Site 4 - Blair Flats, unburned prairie	43.3854	-80.369	264
Arthropoda	Insecta	Diptera	Chironomidae	Orthocladiinae	Orthocladius	Orthocladius oliveri	Angela Telfer	RRMPB216-15	BOLD:AAB7872	pending	07-May-2015	Site 4 - Blair Flats, unburned prairie	43.385	-80.369	264
Arthropoda	Insecta	Diptera	Chironomidae	Orthocladiinae	Orthocladius	Orthocladius oliveri	Angela Telfer	RRMPB360-15	BOLD:AAB7872	pending	07-May-2015	Site 4 - Blair Flats, unburned prairie	43.385	-80.369	264
Arthropoda	Insecta	Diptera	Chironomidae	Orthocladiinae	Orthocladius	Orthocladius oliveri	Angela Telfer	RRMPA619-15	BOLD:AAB7872	pending	29-Apr-2015	Site 4 - Blair Flats, unburned prairie	43.3854	-80.369	264
Arthropoda	Collembola	Symphypleona	Bourletiellidae				Angela Telfer	RRSSA1419-15	BOLD:AAB7913	pending	31-May-2015	Site 1 - Field Edge Forest	43.374	-80.354	332
Arthropoda	Collembola	Symphypleona	Bourletiellidae				Angela Telfer	RRSSA1469-15	BOLD:AAB7913	pending	31-May-2015	Site 1 - Field Edge Forest	43.374	-80.354	332
Arthropoda	Collembola	Symphypleona	Bourletiellidae				Angela Telfer	RRSSA1437-15	BOLD:AAB7913	pending	31-May-2015	Site 1 - Field Edge Forest	43.374	-80.354	332
Arthropoda	Collembola	Symphypleona	Bourletiellidae				Angela Telfer	RRSSA1503-15	BOLD:AAB7913	pending	31-May-2015	Site 1 - Field Edge Forest	43.374	-80.354	332
Arthropoda	Collembola	Symphypleona	Bourletiellidae				Angela Telfer	RRSSA1506-15	BOLD:AAB7913	pending	31-May-2015	Site 1 - Field Edge Forest	43.374	-80.354	332
Arthropoda	Collembola	Symphypleona	Bourletiellidae				Angela Telfer	RRSSA1427-15	BOLD:AAB7913	pending	31-May-2015	Site 1 - Field Edge Forest	43.374	-80.354	332
Arthropoda	Collembola	Symphypleona	Bourletiellidae				Angela Telfer	RRSSA2863-15	BOLD:AAB7913	pending	31-May-2015	Site 1 - Field Edge Forest	43.374	-80.354	332
Arthropoda	Collembola	Symphypleona	Bourletiellidae				Angela Telfer	RRSSA2971-15	BOLD:AAB7913	pending	31-May-2015	Site 1 - Field Edge Forest	43.374	-80.354	332
Arthropoda	Collembola	Symphypleona	Bourletiellidae				Angela Telfer	RRSSA1434-15	BOLD:AAB7913	pending	31-May-2015	Site 1 - Field Edge Forest	43.374	-80.354	332
Arthropoda	Collembola	Symphypleona	Bourletiellidae				Angela Telfer	RRSSA1414-15	BOLD:AAB7913	pending	31-May-2015	Site 1 - Field Edge Forest	43.374	-80.354	332
Arthropoda	Collembola	Symphypleona	Bourletiellidae				Angela Telfer	RRSSA2850-15	BOLD:AAB7913	pending	31-May-2015	Site 1 - Field Edge Forest	43.374	-80.354	332
Arthropoda	Collembola	Symphypleona	Bourletiellidae				Angela Telfer	RRSSA1432-15	BOLD:AAB7913	pending	31-May-2015	Site 1 - Field Edge Forest	43.374	-80.354	332
Arthropoda	Collembola	Symphypleona	Bourletiellidae				Angela Telfer	RRSSA1510-15	BOLD:AAB7913	pending	31-May-2015	Site 1 - Field Edge Forest	43.374	-80.354	332
Arthropoda	Collembola	Symphypleona	Bourletiellidae				Angela Telfer	RRSSA2981-15	BOLD:AAB7913	pending	31-May-2015	Site 1 - Field Edge Forest	43.374	-80.354	332
Arthropoda	Collembola	Symphypleona	Bourletiellidae				Angela Telfer	RRSSA1496-15	BOLD:AAB7913	pending	31-May-2015	Site 1 - Field Edge Forest	43.374	-80.354	332
Arthropoda	Collembola	Symphypleona	Bourletiellidae				Angela Telfer	RRSSA1416-15	BOLD:AAB7913	pending	31-May-2015	Site 1 - Field Edge Forest	43.374	-80.354	332
Arthropoda	Collembola	Symphypleona	Bourletiellidae				Angela Telfer	RRSSA1455-15	BOLD:AAB7913	pending	31-May-2015	Site 1 - Field Edge Forest	43.374	-80.354	332
Arthropoda	Collembola	Symphypleona	Bourletiellidae				Angela Telfer	RRSSA1413-15	BOLD:AAB7913	pending	31-May-2015	Site 1 - Field Edge Forest	43.374	-80.354	332
Arthropoda	Collembola	Symphypleona	Bourletiellidae				Angela Telfer	RRSSA1418-15	BOLD:AAB7913	pending	31-May-2015	Site 1 - Field Edge Forest	43.374	-80.354	332
Arthropoda	Collembola	Symphypleona	Bourletiellidae				Angela Telfer	RRMFG2990-15	BOLD:AAB7913	pending	11-Jun-2015	Site 3 - South Field, forest edge	43.37	-80.364	312
Arthropoda	Collembola	Symphypleona	Bourletiellidae				Angela Telfer	RRSSA1504-15	BOLD:AAB7913	pending	31-May-2015	Site 1 - Field Edge Forest	43.374	-80.354	332
Arthropoda	Collembola	Symphypleona	Bourletiellidae				Angela Telfer	RRSSA1468-15	BOLD:AAB7913	pending	31-May-2015	Site 1 - Field Edge Forest	43.374	-80.354	332
Arthropoda	Collembola	Symphypleona	Bourletiellidae				Angela Telfer	RRSSA1415-15	BOLD:AAB7913	pending	31-May-2015	Site 1 - Field Edge Forest	43.374	-80.354	332
Arthropoda	Collembola	Symphypleona	Bourletiellidae				Angela Telfer	RRSSA2860-15	BOLD:AAB7913	pending	31-May-2015	Site 1 - Field Edge Forest	43.374	-80.354	332
Arthropoda	Collembola	Symphypleona	Bourletiellidae				Angela Telfer	RRSSA1411-15	BOLD:AAB7913	pending	31-May-2015	Site 1 - Field Edge Forest	43.374	-80.354	332
Arthropoda	Collembola	Symphypleona	Bourletiellidae				Angela Telfer	RRSSA2995-15	BOLD:AAB7913	pending	31-May-2015	Site 1 - Field Edge Forest	43.374	-80.354	332
Arthropoda	Collembola	Symphypleona	Bourletiellidae				Angela Telfer	RRSSA1498-15	BOLD:AAB7913	pending	31-May-2015	Site 1 - Field Edge Forest	43.374	-80.354	332
Arthropoda	Collembola	Symphypleona	Bourletiellidae				Angela Telfer	RRSSA1433-15	BOLD:AAB7913	pending	31-May-2015	Site 1 - Field Edge Forest	43.374	-80.354	332
Arthropoda	Collembola	Symphypleona	Bourletiellidae				Angela Telfer	RRSSA1409-15	BOLD:AAB7913	pending	31-May-2015	Site 1 - Field Edge Forest	43.374	-80.354	332
Arthropoda	Collembola	Symphypleona	Bourletiellidae				Angela Telfer	RRSSA1499-15	BOLD:AAB7913	pending	31-May-2015	Site 1 - Field Edge Forest	43.374	-80.354	332
Arthropoda	Collembola	Symphypleona	Bourletiellidae				Angela Telfer	RRSSA1422-15	BOLD:AAB7913	pending	31-May-2015	Site 1 - Field Edge Forest	43.374	-80.354	332
Arthropoda	Collembola	Symphypleona	Bourletiellidae				Angela Telfer	RRSSA1461-15	BOLD:AAB7913	pending	31-May-2015	Site 1 - Field Edge Forest	43.374	-80.354	332
Arthropoda	Collembola	Symphypleona	Bourletiellidae				Angela Telfer	RRSSA1502-15	BOLD:AAB7913	pending	31-May-2015	Site 1 - Field Edge Forest	43.374	-80.354	332
Arthropoda	Collembola	Symphypleona	Bourletiellidae				Angela Telfer	RRSSA371-15	BOLD:AAB7913	pending	31-May-2015	Site 1 - Field Edge Forest	43.374	-80.354	332
Arthropoda	Collembola	Symphypleona	Bourletiellidae				Angela Telfer	RRSSA1507-15	BOLD:AAB7913	pending	31-May-2015	Site 1 - Field Edge Forest	43.374	-80.354	332
Arthropoda	Collembola	Symphypleona	Bourletiellidae				Angela Telfer	RRSSA1509-15	BOLD:AAB7913	pending	31-May-2015	Site 1 - Field Edge Forest	43.374	-80.354	332
Arthropoda	Collembola	Symphypleona	Bourletiellidae				Angela Telfer	RRSSA1439-15	BOLD:AAB7913	pending	31-May-2015	Site 1 - Field Edge Forest	43.374	-80.354	332
Arthropoda	Collembola	Symphypleona	Bourletiellidae				Angela Telfer	RRSSA1462-15	BOLD:AAB7913	pending	31-May-2015	Site 1 - Field Edge Forest	43.374	-80.354	332
Arthropoda	Collembola	Symphypleona	Bourletiellidae				Angela Telfer	RRSSA1464-15	BOLD:AAB7913	pending	31-May-2015	Site 1 - Field Edge Forest	43.374	-80.354	332
Arthropoda	Collembola	Symphypleona	Bourletiellidae				Angela Telfer	RRSSA1440-15	BOLD:AAB7913	pending	31-May-2015	Site 1 - Field Edge Forest	43.374	-80.354	332
Arthropoda	Collembola	Symphypleona	Bourletiellidae				Angela Telfer	RRSSA1457-15	BOLD:AAB7913	pending	31-May-2015	Site 1 - Field Edge Forest	43.374	-80.354	332
Arthropoda	Collembola	Symphypleona	Bourletiellidae				Angela Telfer	RRSSA364-15	BOLD:AAB7913	pending	31-May-2015	Site 1 - Field Edge Forest	43.374	-80.354	332
Arthropoda	Collembola	Symphypleona	Bourletiellidae				Angela Telfer	RRSSA1511-15	BOLD:AAB7913	pending	31-May-2015	Site 1 - Field Edge Forest	43.374	-80.354	332
Arthropoda	Collembola	Symphypleona	Bourletiellidae				Angela Telfer	RRSSA1430-15	BOLD:AAB7913	pending	31-May-2015	Site 1 - Field Edge Forest	43.374	-80.354	332
Arthropoda	Collembola	Symphypleona	Bourletiellidae				Angela Telfer	RRSSA365-15	BOLD:AAB7913	pending	31-May-2015	Site 1 - Field Edge Forest	43.374	-80.354	332
Arthropoda	Collembola	Symphypleona	Bourletiellidae				Angela Telfer	RRSSA1501-15	BOLD:AAB7913	pending	31-May-2015	Site 1 - Field Edge Forest	43.374	-80.354	332
Arthropoda	Collembola	Symphypleona	Bourletiellidae				Angela Telfer	RRSSA361-15	BOLD:AAB7913	pending	31-May-2015	Site 1 - Field Edge Forest	43.374	-80.354	332
Arthropoda	Collembola	Symphypleona	Bourletiellidae				Angela Telfer	RRSSA1467-15	BOLD:AAB7913	pending	31-May-2015	Site 1 - Field Edge Forest	43.374	-80.354	332
Arthropoda	Collembola	Symphypleona	Bourletiellidae				Angela Telfer	RRSSA1465-15	BOLD:AAB7913	pending	31-May-2015	Site 1 - Field Edge Forest	43.374	-80.354	332
Arthropoda	Collembola	Symphypleona	Bourletiellidae				Angela Telfer	RRSSA2862-15	BOLD:AAB7913	pending	31-May-2015	Site 1 - Field Edge Forest	43.374	-80.354	332
Arthropoda	Collembola	Symphypleona	Bourletiellidae				Angela Telfer	RRSSA1428-15	BOLD:AAB7913	pending	31-May-2015	Site 1 - Field Edge Forest	43.374	-80.354	332
Arthropoda	Collembola	Symphypleona	Bourletiellidae				Angela Telfer	RRSSA1453-15	BOLD:AAB7913	pending	31-May-2015	Site 1 - Field Edge Forest	43.374	-80.354	332
Arthropoda	Collembola	Symphypleona	Bourletiellidae				Angela Telfer	RRSSA1459-15	BOLD:AAB7913	pending	31-May-2015	Site 1 - Field Edge Forest	43.374	-80.354	332
Arthropoda	Collembola	Symphypleona	Bourletiellidae				Angela Telfer	RRSSA1452-15	BOLD:AAB7913	pending	31-May-2015	Site 1 - Field Edge Forest	43.374	-80.354	332
Arthropoda	Collembola	Symphypleona	Bourletiellidae				Angela Telfer	RRMFG2991-15	BOLD:AAB7913	pending	11-Jun-2015	Site 3 - South Field, forest edge	43.37	-80.364	312
Arthropoda	Collembola	Symphypleona	Bourletiellidae				Angela Telfer	RRSSA1512-15	BOLD:AAB7913	pending	31-May-2015	Site 1 - Field Edge Forest	43.374	-80.354	332
Arthropoda	Collembola	Symphypleona	Bourletiellidae				Angela Telfer	RRSSA1505-15	BOLD:AAB7913	pending	31-May-2015	Site 1 - Field Edge Forest	43.374	-80.354	332
Arthropoda	Collembola	Symphypleona	Bourletiellidae				Angela Telfer	RRSSA373-15	BOLD:AAB7913	pending	31-May-2015	Site 1 - Field Edge Forest	43.374	-80.354	332
Arthropoda	Collembola	Symphypleona	Bourletiellidae				Angela Telfer	RRSSA1446-15	BOLD:AAB7913	pending	31-May-2015	Site 1 - Field Edge Forest	43.374	-80.354	332
Arthropoda	Collembola	Symphypleona	Bourletiellidae				Angela Telfer	RRSSA1471-15	BOLD:AAB7913	pending	31-May-2015	Site 1 - Field Edge Forest	43.374	-80.354	332
Arthropoda	Collembola	Symphypleona	Bourletiellidae		Bourletiella		Angela Telfer	RRSSA1402-15	BOLD:AAB7914	pending	31-May-2015	Site 1 - Field Edge Forest	43.374	-80.354	332
Arthropoda	Collembola	Symphypleona	Bourletiellidae		Bourletiella		Angela Telfer	RRSSA1425-15	BOLD:AAB7914	pending	31-May-2015	Site 1 - Field Edge Forest	43.374	-80.354	332
Arthropoda	Collembola	Symphypleona	Bourletiellidae		Bourletiella		Angela Telfer	RRSSA1426-15	BOLD:AAB7914	pending	31-May-2015	Site 1 - Field Edge Forest	43.374	-80.354	332
Arthropoda	Collembola	Symphypleona	Bourletiellidae		Deuterosminthurus		Angela Telfer	RRSSA2921-15	BOLD:AAB7915	pending	31-May-2015	Site 1 - Field Edge Forest	43.374	-80.354	332
Arthropoda	Collembola	Symphypleona	Bourletiellidae		Deuterosminthurus		Angela Telfer	RRSSA4213-15	BOLD:AAB7915	pending	27-May-2015	Site 1 - Field Edge Forest	43.374	-80.354	332
Arthropoda	Collembola	Symphypleona	Bourletiellidae		Deuterosminthurus		Angela Telfer	RRSSA4215-15	BOLD:AAB7915	pending	27-May-2015	Site 1 - Field Edge Forest	43.374	-80.354	332
Arthropoda	Collembola	Symphypleona	Bourletiellidae		Deuterosminthurus		Angela Telfer	RRSSA2873-15	BOLD:AAB7915	pending	31-May-2015	Site 1 - Field Edge Forest	43.374	-80.354	332
Arthropoda	Collembola	Symphypleona	Bourletiellidae		Deuterosminthurus		Angela Telfer	RRSSA4210-15	BOLD:AAB7915	pending	27-May-2015	Site 1 - Field Edge Forest	43.374	-80.354	332
Arthropoda	Collembola	Symphypleona	Bourletiellidae		Deuterosminthurus		Angela Telfer	RRSSA2831-15	BOLD:AAB7915	pending	31-May-2015	Site 1 - Field Edge Forest	43.374	-80.354	332
Arthropoda	Collembola	Symphypleona	Bourletiellidae		Deuterosminthurus		Angela Telfer	RRSSA2865-15	BOLD:AAB7915	pending	31-May-2015	Site 1 - Field Edge Forest	43.374	-80.354	332
Arthropoda	Collembola	Symphypleona	Bourletiellidae		Deuterosminthurus		Angela Telfer	RRSSA2976-15	BOLD:AAB7915	pending	31-May-2015	Site 1 - Field Edge Forest	43.374	-80.354	332
Arthropoda	Collembola	Symphypleona	Bourletiellidae		Deuterosminthurus		Angela Telfer	RRSSA2997-15	BOLD:AAB7915	pending	31-May-2015	Site 1 - Field Edge Forest	43.374	-80.354	332
Arthropoda	Collembola	Symphypleona	Bourletiellidae		Deuterosminthurus		Angela Telfer	RRSSA3015-15	BOLD:AAB7915	pending	31-May-2015	Site 1 - Field Edge Forest	43.374	-80.354	332
Arthropoda	Collembola	Symphypleona	Bourletiellidae		Deuterosminthurus		Angela Telfer	RRBGA147-15	BOLD:AAB7915	pending	01-May-2015	Site 2 - South Field, field	43.37	-80.364	312
Arthropoda	Collembola	Symphypleona	Bourletiellidae		Deuterosminthurus		Angela Telfer	RRBGA097-15	BOLD:AAB7915	pending	01-May-2015	Site 2 - South Field, field	43.37	-80.364	312
Arthropoda	Collembola	Symphypleona	Bourletiellidae		Deuterosminthurus		Angela Telfer	RRBGA146-15	BOLD:AAB7915	pending	01-May-2015	Site 2 - South Field, field	43.37	-80.364	312
Arthropoda	Collembola	Symphypleona	Bourletiellidae		Deuterosminthurus		Angela Telfer	RRSSA2990-15	BOLD:AAB7915	pending	31-May-2015	Site 1 - Field Edge Forest	43.374	-80.354	332
Arthropoda	Collembola	Symphypleona	Bourletiellidae		Deuterosminthurus		Angela Telfer	RRSSA2180-15	BOLD:AAB7915	pending	31-May-2015	Site 1 - Field Edge Forest	43.374	-80.354	332
Arthropoda	Collembola	Symphypleona	Bourletiellidae		Deuterosminthurus		Angela Telfer	RRSSA2832-15	BOLD:AAB7915	pending	31-May-2015	Site 1 - Field Edge Forest	43.374	-80.354	332
Arthropoda	Collembola	Symphypleona	Bourletiellidae		Deuterosminthurus		Angela Telfer	RRSSA3517-15	BOLD:AAB7915	pending	31-May-2015	Site 1 - Field Edge Forest	43.374	-80.354	332
Arthropoda	Collembola	Symphypleona	Bourletiellidae		Deuterosminthurus		Angela Telfer	RRSSA1384-15	BOLD:AAB7915	pending	31-May-2015	Site 1 - Field Edge Forest	43.374	-80.354	332
Arthropoda	Collembola	Symphypleona	Bourletiellidae		Deuterosminthurus		Angela Telfer	RRSSA328-15	BOLD:AAB7915	pending	29-May-2015	Site 1 - Field Edge Forest	43.374	-80.354	332
Arthropoda	Collembola	Symphypleona	Bourletiellidae		Deuterosminthurus		Angela Telfer	RRSSA2984-15	BOLD:AAB7915	pending	31-May-2015	Site 1 - Field Edge Forest	43.374	-80.354	332
Arthropoda	Collembola	Symphypleona	Bourletiellidae		Deuterosminthurus		Angela Telfer	RRSSA2988-15	BOLD:AAB7915	pending	31-May-2015	Site 1 - Field Edge Forest	43.374	-80.354	332
Arthropoda	Collembola	Symphypleona	Bourletiellidae		Deuterosminthurus		Angela Telfer	RRSSA1393-15	BOLD:AAB7915	pending	31-May-2015	Site 1 - Field Edge Forest	43.374	-80.354	332
Arthropoda	Collembola	Symphypleona	Bourletiellidae		Deuterosminthurus		Angela Telfer	RRSSA2238-15	BOLD:AAB7915	pending	31-May-2015	Site 1 - Field Edge Forest	43.374	-80.354	332
Arthropoda	Collembola	Symphypleona	Bourletiellidae		Deuterosminthurus		Angela Telfer	RRSSA1392-15	BOLD:AAB7915	pending	31-May-2015	Site 1 - Field Edge Forest	43.374	-80.354	332
Arthropoda	Collembola	Symphypleona	Bourletiellidae		Deuterosminthurus		Angela Telfer	RRSSA2182-15	BOLD:AAB7915	pending	31-May-2015	Site 1 - Field Edge Forest	43.374	-80.354	332
Arthropoda	Collembola	Symphypleona	Bourletiellidae		Deuterosminthurus		Angela Telfer	RRSSA2982-15	BOLD:AAB7915	pending	31-May-2015	Site 1 - Field Edge Forest	43.374	-80.354	332
Arthropoda	Collembola	Symphypleona	Bourletiellidae		Deuterosminthurus		Angela Telfer	RRSSA3006-15	BOLD:AAB7915	pending	31-May-2015	Site 1 - Field Edge Forest	43.374	-80.354	332
Arthropoda	Collembola	Symphypleona	Bourletiellidae		Deuterosminthurus		Angela Telfer	RRSSA4211-15	BOLD:AAB7915	pending	27-May-2015	Site 1 - Field Edge Forest	43.374	-80.354	332
Arthropoda	Collembola	Symphypleona	Bourletiellidae		Deuterosminthurus		Angela Telfer	RRSSA2989-15	BOLD:AAB7915	pending	31-May-2015	Site 1 - Field Edge Forest	43.374	-80.354	332
Arthropoda	Collembola	Symphypleona	Bourletiellidae		Deuterosminthurus		Angela Telfer	RRSSA1394-15	BOLD:AAB7915	pending	31-May-2015	Site 1 - Field Edge Forest	43.374	-80.354	332
Arthropoda	Collembola	Symphypleona	Bourletiellidae		Deuterosminthurus		Angela Telfer	RRSSA2672-15	BOLD:AAB7915	pending	31-May-2015	Site 1 - Field Edge Forest	43.374	-80.354	332
Arthropoda	Collembola	Symphypleona	Bourletiellidae		Deuterosminthurus		Angela Telfer	RRSSA3007-15	BOLD:AAB7915	pending	31-May-2015	Site 1 - Field Edge Forest	43.374	-80.354	332
Arthropoda	Collembola	Symphypleona	Bourletiellidae		Deuterosminthurus		Angela Telfer	RRSSA2970-15	BOLD:AAB7915	pending	31-May-2015	Site 1 - Field Edge Forest	43.374	-80.354	332
Arthropoda	Collembola	Symphypleona	Bourletiellidae		Deuterosminthurus		Angela Telfer	RRSSA2983-15	BOLD:AAB7915	pending	31-May-2015	Site 1 - Field Edge Forest	43.374	-80.354	332
Arthropoda	Collembola	Symphypleona	Bourletiellidae		Deuterosminthurus		Angela Telfer	RRSSA2236-15	BOLD:AAB7915	pending	31-May-2015	Site 1 - Field Edge Forest	43.374	-80.354	332
Arthropoda	Collembola	Symphypleona	Bourletiellidae		Deuterosminthurus		Angela Telfer	RRSSA1395-15	BOLD:AAB7915	pending	31-May-2015	Site 1 - Field Edge Forest	43.374	-80.354	332
Arthropoda	Collembola	Symphypleona	Bourletiellidae		Deuterosminthurus		Angela Telfer	RRSSA2977-15	BOLD:AAB7915	pending	31-May-2015	Site 1 - Field Edge Forest	43.374	-80.354	332
Arthropoda	Collembola	Symphypleona	Bourletiellidae		Deuterosminthurus		Angela Telfer	RRSSA2991-15	BOLD:AAB7915	pending	31-May-2015	Site 1 - Field Edge Forest	43.374	-80.354	332
Arthropoda	Collembola	Symphypleona	Bourletiellidae		Deuterosminthurus		Angela Telfer	RRSSA4212-15	BOLD:AAB7915	pending	27-May-2015	Site 1 - Field Edge Forest	43.374	-80.354	332
Arthropoda	Collembola	Symphypleona	Bourletiellidae		Deuterosminthurus		Angela Telfer	RRSSA2671-15	BOLD:AAB7915	pending	31-May-2015	Site 1 - Field Edge Forest	43.374	-80.354	332
Arthropoda	Collembola	Symphypleona	Bourletiellidae		Deuterosminthurus		Angela Telfer	RRSSA2239-15	BOLD:AAB7915	pending	31-May-2015	Site 1 - Field Edge Forest	43.374	-80.354	332
Arthropoda	Collembola	Symphypleona	Bourletiellidae		Deuterosminthurus		Angela Telfer	RRSSA2925-15	BOLD:AAB7915	pending	31-May-2015	Site 1 - Field Edge Forest	43.374	-80.354	332
Arthropoda	Collembola	Symphypleona	Bourletiellidae		Deuterosminthurus		Angela Telfer	RRSSA1388-15	BOLD:AAB7915	pending	31-May-2015	Site 1 - Field Edge Forest	43.374	-80.354	332
Arthropoda	Collembola	Symphypleona	Bourletiellidae		Deuterosminthurus		Angela Telfer	RRBPA041-15	BOLD:AAB7915	pending	01-May-2015	Site 4 - Blair Flats, unburned prairie	43.385	-80.369	264
Arthropoda	Collembola	Symphypleona	Bourletiellidae		Deuterosminthurus		Angela Telfer	RRSSA1386-15	BOLD:AAB7915	pending	31-May-2015	Site 1 - Field Edge Forest	43.374	-80.354	332
Arthropoda	Collembola	Symphypleona	Bourletiellidae		Deuterosminthurus		Angela Telfer	RRSSA2851-15	BOLD:AAB7915	pending	31-May-2015	Site 1 - Field Edge Forest	43.374	-80.354	332
Arthropoda	Collembola	Symphypleona	Bourletiellidae		Deuterosminthurus		Angela Telfer	RRSSA3009-15	BOLD:AAB7915	pending	31-May-2015	Site 1 - Field Edge Forest	43.374	-80.354	332
Arthropoda	Collembola	Symphypleona	Bourletiellidae		Deuterosminthurus		Angela Telfer	RRSSA2184-15	BOLD:AAB7915	pending	31-May-2015	Site 1 - Field Edge Forest	43.374	-80.354	332
Arthropoda	Collembola	Symphypleona	Bourletiellidae		Deuterosminthurus		Angela Telfer	RRSSA3005-15	BOLD:AAB7915	pending	31-May-2015	Site 1 - Field Edge Forest	43.374	-80.354	332
Arthropoda	Collembola	Symphypleona	Bourletiellidae		Deuterosminthurus		Angela Telfer	RRSSA3568-15	BOLD:AAB7915	pending	01-Jun-2015	Site 1 - Field Edge Forest	43.374	-80.354	332
Arthropoda	Collembola	Symphypleona	Bourletiellidae		Deuterosminthurus		Angela Telfer	RRSSA2181-15	BOLD:AAB7915	pending	31-May-2015	Site 1 - Field Edge Forest	43.374	-80.354	332
Arthropoda	Collembola	Symphypleona	Bourletiellidae		Deuterosminthurus		Angela Telfer	RRSSA1389-15	BOLD:AAB7915	pending	31-May-2015	Site 1 - Field Edge Forest	43.374	-80.354	332
Arthropoda	Collembola	Symphypleona	Bourletiellidae		Deuterosminthurus		Angela Telfer	RRSSA2975-15	BOLD:AAB7915	pending	31-May-2015	Site 1 - Field Edge Forest	43.374	-80.354	332
Arthropoda	Collembola	Symphypleona	Bourletiellidae		Deuterosminthurus		Angela Telfer	RRSSA2965-15	BOLD:AAB7915	pending	31-May-2015	Site 1 - Field Edge Forest	43.374	-80.354	332
Arthropoda	Collembola	Symphypleona	Bourletiellidae		Deuterosminthurus		Angela Telfer	RRSSA1385-15	BOLD:AAB7915	pending	31-May-2015	Site 1 - Field Edge Forest	43.374	-80.354	332
Arthropoda	Collembola	Symphypleona	Bourletiellidae		Deuterosminthurus		Angela Telfer	RRSSA2234-15	BOLD:AAB7915	pending	31-May-2015	Site 1 - Field Edge Forest	43.374	-80.354	332
Arthropoda	Collembola	Symphypleona	Bourletiellidae		Deuterosminthurus		Angela Telfer	RRSSA2966-15	BOLD:AAB7915	pending	31-May-2015	Site 1 - Field Edge Forest	43.374	-80.354	332
Arthropoda	Collembola	Symphypleona	Bourletiellidae		Deuterosminthurus		Angela Telfer	RRSSA2667-15	BOLD:AAB7915	pending	31-May-2015	Site 1 - Field Edge Forest	43.374	-80.354	332
Arthropoda	Collembola	Symphypleona	Bourletiellidae		Deuterosminthurus		Angela Telfer	RRMPC871-15	BOLD:AAB7915	pending	14-May-2015	Site 4 - Blair Flats, unburned prairie	43.385	-80.369	264
Arthropoda	Collembola	Symphypleona	Bourletiellidae		Deuterosminthurus		Angela Telfer	RRSSA3008-15	BOLD:AAB7915	pending	31-May-2015	Site 1 - Field Edge Forest	43.374	-80.354	332
Arthropoda	Collembola	Symphypleona	Bourletiellidae		Deuterosminthurus		Angela Telfer	RRSSA2183-15	BOLD:AAB7915	pending	31-May-2015	Site 1 - Field Edge Forest	43.374	-80.354	332
Arthropoda	Collembola	Symphypleona	Bourletiellidae		Deuterosminthurus		Angela Telfer	RRSSA3569-15	BOLD:AAB7915	pending	01-Jun-2015	Site 1 - Field Edge Forest	43.374	-80.354	332
Arthropoda	Collembola	Symphypleona	Bourletiellidae		Deuterosminthurus		Angela Telfer	RRSSA329-15	BOLD:AAB7915	pending	29-May-2015	Site 1 - Field Edge Forest	43.374	-80.354	332
Arthropoda	Collembola	Symphypleona	Bourletiellidae		Deuterosminthurus		Angela Telfer	RRSSA1383-15	BOLD:AAB7915	pending	31-May-2015	Site 1 - Field Edge Forest	43.374	-80.354	332
Arthropoda	Collembola	Symphypleona	Bourletiellidae		Deuterosminthurus		Angela Telfer	RRSSA2974-15	BOLD:AAB7915	pending	31-May-2015	Site 1 - Field Edge Forest	43.374	-80.354	332
Arthropoda	Collembola	Symphypleona	Bourletiellidae		Deuterosminthurus		Angela Telfer	RRSSA2241-15	BOLD:AAB7915	pending	31-May-2015	Site 1 - Field Edge Forest	43.374	-80.354	332
Arthropoda	Collembola	Symphypleona	Bourletiellidae		Deuterosminthurus		Angela Telfer	RRMFE3336-15	BOLD:AAB7915	pending	27-May-2015	Site 3 - South Field, forest edge	43.3705	-80.3641	312
Arthropoda	Collembola	Symphypleona	Bourletiellidae		Deuterosminthurus		Angela Telfer	RRSSA2248-15	BOLD:AAB7915	pending	31-May-2015	Site 1 - Field Edge Forest	43.374	-80.354	332
Arthropoda	Collembola	Symphypleona	Bourletiellidae		Deuterosminthurus		Angela Telfer	RRSSA1460-15	BOLD:AAB7915	pending	31-May-2015	Site 1 - Field Edge Forest	43.374	-80.354	332
Arthropoda	Arachnida	Araneae	Araneidae		Argiope	Argiope aurantia	Gergin A. Blagoev	RRSPI076-15	BOLD:AAB7933	pending	31-May-2015	Site 3 - Grassy Wetland	43.391	-80.375	270
Arthropoda	Arachnida	Araneae	Araneidae		Eustala	Eustala cepina	Gergin A. Blagoev	RRSPI321-15	BOLD:AAB7935	pending	25-May-2015	Site 3 - Grassy Wetland	43.391	-80.375	270
Arthropoda	Insecta	Hemiptera	Aphididae	Aphidinae	Aphis	Aphis glycines	Angela Telfer	RRMFG3200-15	BOLD:AAB7938	pending	11-Jun-2015	Site 3 - South Field, forest edge	43.37	-80.364	312
Arthropoda	Arachnida	Araneae	Tetragnathidae		Tetragnatha	Tetragnatha shoshone	Gergin A. Blagoev	RRMPB142-15	BOLD:AAB7995	pending	07-May-2015	Site 4 - Blair Flats, unburned prairie	43.385	-80.369	264
Arthropoda	Arachnida	Araneae	Tetragnathidae		Tetragnatha	Tetragnatha shoshone	Gergin A. Blagoev	RRMPB146-15	BOLD:AAB7995	pending	07-May-2015	Site 4 - Blair Flats, unburned prairie	43.385	-80.369	264
Arthropoda	Arachnida	Araneae	Amaurobiidae		Callobius	Callobius bennetti	Gergin A. Blagoev	RRSSA2485-15	BOLD:AAB8212	pending	31-May-2015	Site 1 - Field Edge Forest	43.374	-80.354	332
Arthropoda	Arachnida	Araneae	Araneidae		Araneus	Araneus trifolium	Gergin A. Blagoev	RRSPI340-15	BOLD:AAB8544	pending	04-Jun-2015	Site 4 - Blair Flats, unburned prairie	43.385	-80.369	264
Arthropoda	Insecta	Lepidoptera	Noctuidae	Noctuinae	Papaipema		Angela Telfer	RRMFG3263-15	BOLD:AAB8711	pending	11-Jun-2015	Site 3 - South Field, forest edge	43.37	-80.364	312
Arthropoda	Arachnida	Araneae	Tetragnathidae		Leucauge	Leucauge venusta	Gergin A. Blagoev	RRSPI074-15	BOLD:AAB8714	pending	25-May-2015	Site 1 - Field Edge Forest	43.374	-80.354	332
Arthropoda	Insecta	Diptera	Muscidae	Azeliinae	Muscina	Muscina levida	Angela Telfer	RRMFB1079-15	BOLD:AAB8817	pending	07-May-2015	Site 3 - South Field, forest edge	43.37	-80.364	312
Arthropoda	Insecta	Diptera	Muscidae	Azeliinae	Muscina	Muscina levida	Angela Telfer	RRMFA217-15	BOLD:AAB8817	pending	29-Apr-2015	Site 3 - South Field, forest edge	43.3705	-80.3641	312
Arthropoda	Insecta	Diptera	Muscidae	Azeliinae	Muscina	Muscina levida	Angela Telfer	RRMFA202-15	BOLD:AAB8817	pending	29-Apr-2015	Site 3 - South Field, forest edge	43.3705	-80.3641	312
Arthropoda	Insecta	Diptera	Muscidae	Azeliinae	Muscina	Muscina levida	Angela Telfer	RRMFA214-15	BOLD:AAB8817	pending	29-Apr-2015	Site 3 - South Field, forest edge	43.3705	-80.3641	312
Arthropoda	Insecta	Diptera	Muscidae	Azeliinae	Muscina	Muscina levida	Angela Telfer	RRMFB1291-15	BOLD:AAB8817	pending	07-May-2015	Site 3 - South Field, forest edge	43.37	-80.364	312
Arthropoda	Insecta	Diptera	Muscidae	Azeliinae	Muscina	Muscina levida	Angela Telfer	RRMFA235-15	BOLD:AAB8817	pending	29-Apr-2015	Site 3 - South Field, forest edge	43.3705	-80.3641	312
Arthropoda	Insecta	Diptera	Muscidae	Azeliinae	Muscina	Muscina levida	Angela Telfer	RRMPB090-15	BOLD:AAB8817	pending	07-May-2015	Site 4 - Blair Flats, unburned prairie	43.385	-80.369	264
Arthropoda	Insecta	Diptera	Muscidae	Azeliinae	Muscina	Muscina levida	Angela Telfer	RRMFB1278-15	BOLD:AAB8817	pending	07-May-2015	Site 3 - South Field, forest edge	43.37	-80.364	312
Arthropoda	Insecta	Diptera	Muscidae	Azeliinae	Muscina	Muscina levida	Angela Telfer	RRMFA213-15	BOLD:AAB8817	pending	29-Apr-2015	Site 3 - South Field, forest edge	43.3705	-80.3641	312
Arthropoda	Insecta	Diptera	Muscidae	Azeliinae	Muscina	Muscina levida	Angela Telfer	RRMFA194-15	BOLD:AAB8817	pending	29-Apr-2015	Site 3 - South Field, forest edge	43.3705	-80.3641	312
Arthropoda	Insecta	Diptera	Muscidae	Azeliinae	Muscina	Muscina levida	Angela Telfer	RRMPB086-15	BOLD:AAB8817	pending	07-May-2015	Site 4 - Blair Flats, unburned prairie	43.385	-80.369	264
Arthropoda	Insecta	Diptera	Muscidae	Azeliinae	Muscina	Muscina levida	Angela Telfer	RRMFC2015-15	BOLD:AAB8817	pending	14-May-2015	Site 3 - South Field, forest edge	43.37	-80.364	312
Arthropoda	Insecta	Diptera	Muscidae	Azeliinae	Muscina	Muscina levida	Angela Telfer	RRMFA228-15	BOLD:AAB8817	pending	29-Apr-2015	Site 3 - South Field, forest edge	43.3705	-80.3641	312
Arthropoda	Insecta	Hymenoptera	Halictidae	Halictinae	Lasioglossum		Angela Telfer	RRMFD469-15	BOLD:AAB8845	pending	21-May-2015	Site 3 - South Field, forest edge	43.37	-80.364	312
Arthropoda	Insecta	Diptera	Drosophilidae	Drosophilinae	Drosophila	Drosophila affinis	Angela Telfer	RRSSA722-15	BOLD:AAB8851	pending	31-May-2015	Site 1 - Field Edge Forest	43.374	-80.354	332
Arthropoda	Insecta	Diptera	Drosophilidae	Drosophilinae	Drosophila	Drosophila affinis	Angela Telfer	RRMFG143-15	BOLD:AAB8851	pending	11-Jun-2015	Site 3 - South Field, forest edge	43.37	-80.364	312
Arthropoda	Insecta	Diptera	Drosophilidae	Drosophilinae	Drosophila	Drosophila affinis	Angela Telfer	RRMFG187-15	BOLD:AAB8851	pending	11-Jun-2015	Site 3 - South Field, forest edge	43.37	-80.364	312
Arthropoda	Insecta	Diptera	Drosophilidae	Drosophilinae	Drosophila	Drosophila affinis	Angela Telfer	RRMFG271-15	BOLD:AAB8851	pending	11-Jun-2015	Site 3 - South Field, forest edge	43.37	-80.364	312
Arthropoda	Insecta	Diptera	Drosophilidae	Drosophilinae	Drosophila	Drosophila affinis	Angela Telfer	RRSSA1111-15	BOLD:AAB8851	pending	31-May-2015	Site 1 - Field Edge Forest	43.374	-80.354	332
Arthropoda	Insecta	Diptera	Drosophilidae	Drosophilinae	Drosophila	Drosophila affinis	Angela Telfer	RRMFG1188-15	BOLD:AAB8851	pending	11-Jun-2015	Site 3 - South Field, forest edge	43.3705	-80.3641	312
Arthropoda	Insecta	Diptera	Drosophilidae	Drosophilinae	Drosophila	Drosophila affinis	Angela Telfer	RRSSA756-15	BOLD:AAB8851	pending	31-May-2015	Site 1 - Field Edge Forest	43.374	-80.354	332
Arthropoda	Insecta	Hymenoptera	Formicidae	Formicinae	Lasius	Lasius neoniger	Angela Telfer	RRMPB4182-15	BOLD:AAB9126	pending	07-May-2015	Site 4 - Blair Flats, unburned prairie	43.385	-80.369	264
Arthropoda	Insecta	Diptera	Calliphoridae		Phormia	Phormia regina	Angela Telfer	RRMFB1269-15	BOLD:AAB9140	pending	07-May-2015	Site 3 - South Field, forest edge	43.37	-80.364	312
Arthropoda	Insecta	Diptera	Calliphoridae		Phormia	Phormia regina	Angela Telfer	RRMFC1689-15	BOLD:AAB9140	pending	14-May-2015	Site 3 - South Field, forest edge	43.37	-80.364	312
Arthropoda	Insecta	Diptera	Calliphoridae		Phormia	Phormia regina	Angela Telfer	RRMFD530-15	BOLD:AAB9140	pending	21-May-2015	Site 3 - South Field, forest edge	43.37	-80.364	312
Arthropoda	Insecta	Diptera	Calliphoridae		Phormia	Phormia regina	Angela Telfer	RRMFA216-15	BOLD:AAB9140	pending	29-Apr-2015	Site 3 - South Field, forest edge	43.3705	-80.3641	312
Arthropoda	Arachnida	Araneae	Linyphiidae		Hypomma	Hypomma marxi	Gergin A. Blagoev	RRSPI334-15	BOLD:AAB9520	pending	04-Jun-2015	Site 4 - Blair Flats, unburned prairie	43.385	-80.369	264
Arthropoda	Insecta	Coleoptera	Curculionidae	Scolytinae	Xyleborinus	Xyleborinus saxeseni	Angela Telfer	RRMFE1708-15	BOLD:AAB9578	pending	27-May-2015	Site 3 - South Field, forest edge	43.3705	-80.3641	312
Arthropoda	Arachnida	Araneae	Theridiidae		Parasteatoda	Parasteatoda tepidariorum	Gergin A. Blagoev	RRSSA2195-15	BOLD:AAC0175	pending	31-May-2015	Site 1 - Field Edge Forest	43.374	-80.354	332
Arthropoda	Arachnida	Araneae	Theridiidae		Parasteatoda	Parasteatoda tepidariorum	Gergin A. Blagoev	RRMFG2590-15	BOLD:AAC0175	pending	11-Jun-2015	Site 3 - South Field, forest edge	43.37	-80.364	312
Arthropoda	Arachnida	Araneae	Theridiidae		Parasteatoda	Parasteatoda tepidariorum	Gergin A. Blagoev	RRSSA1614-15	BOLD:AAC0175	pending	31-May-2015	Site 1 - Field Edge Forest	43.374	-80.354	332
Arthropoda	Insecta	Lepidoptera	Depressariidae	Depressariinae	Agonopterix		Mari Kekkonen	RRMPB003-15	BOLD:AAC0205	pending	07-May-2015	Site 4 - Blair Flats, unburned prairie	43.385	-80.369	264
Arthropoda	Insecta	Lepidoptera	Depressariidae	Depressariinae	Agonopterix		Mari Kekkonen	RRMFD479-15	BOLD:AAC0205	pending	21-May-2015	Site 3 - South Field, forest edge	43.37	-80.364	312
Arthropoda	Insecta	Lepidoptera	Depressariidae	Depressariinae	Agonopterix		Mari Kekkonen	RRMFA249-15	BOLD:AAC0205	pending	29-Apr-2015	Site 3 - South Field, forest edge	43.3705	-80.3641	312
Arthropoda	Insecta	Lepidoptera	Depressariidae	Depressariinae	Agonopterix		Mari Kekkonen	RRMPB4236-15	BOLD:AAC0205	pending	07-May-2015	Site 4 - Blair Flats, unburned prairie	43.3854	-80.369	264
Arthropoda	Insecta	Lepidoptera	Depressariidae	Depressariinae	Agonopterix		Mari Kekkonen	RRMPB110-15	BOLD:AAC0205	pending	07-May-2015	Site 4 - Blair Flats, unburned prairie	43.385	-80.369	264
Arthropoda	Insecta	Lepidoptera	Depressariidae	Depressariinae	Agonopterix		Mari Kekkonen	RRMFB1161-15	BOLD:AAC0205	pending	07-May-2015	Site 3 - South Field, forest edge	43.37	-80.364	312
Arthropoda	Insecta	Lepidoptera	Depressariidae	Depressariinae	Agonopterix		Mari Kekkonen	RRMPC917-15	BOLD:AAC0205	pending	14-May-2015	Site 4 - Blair Flats, unburned prairie	43.385	-80.369	264
Arthropoda	Insecta	Lepidoptera	Depressariidae	Depressariinae	Agonopterix		Mari Kekkonen	RRMFB1026-15	BOLD:AAC0205	pending	07-May-2015	Site 3 - South Field, forest edge	43.37	-80.364	312
Arthropoda	Insecta	Lepidoptera	Depressariidae	Depressariinae	Agonopterix		Mari Kekkonen	RRMFB1028-15	BOLD:AAC0205	pending	07-May-2015	Site 3 - South Field, forest edge	43.37	-80.364	312
Arthropoda	Arachnida	Araneae	Salticidae		Evarcha	Evarcha hoyi	Gergin A. Blagoev	RRSPI132-15	BOLD:AAC0342	pending	29-May-2015	Site 2 - Grassy Field	43.376	-80.375	294
Arthropoda	Insecta	Diptera	Chironomidae	Chironominae	Dicrotendipes	Dicrotendipes tritomus	Angela Telfer	RRMFE1900-15	BOLD:AAC0706	pending	27-May-2015	Site 3 - South Field, forest edge	43.3705	-80.3641	312
Arthropoda	Insecta	Diptera	Chironomidae	Chironominae	Dicrotendipes	Dicrotendipes tritomus	Angela Telfer	RRMFE2383-15	BOLD:AAC0706	pending	27-May-2015	Site 3 - South Field, forest edge	43.3705	-80.3641	312
Arthropoda	Insecta	Diptera	Chironomidae	Chironominae	Dicrotendipes	Dicrotendipes tritomus	Angela Telfer	RRSSA3422-15	BOLD:AAC0706	pending	27-May-2015	Site 1 - Field Edge Forest	43.374	-80.354	332
Arthropoda	Insecta	Diptera	Chironomidae	Chironominae	Dicrotendipes	Dicrotendipes tritomus	Angela Telfer	RRMFE091-15	BOLD:AAC0706	pending	27-May-2015	Site 3 - South Field, forest edge	43.37	-80.364	312
Arthropoda	Insecta	Diptera	Chironomidae	Chironominae	Dicrotendipes	Dicrotendipes tritomus	Angela Telfer	RRSSA3315-15	BOLD:AAC0706	pending	27-May-2015	Site 1 - Field Edge Forest	43.374	-80.354	332
Arthropoda	Insecta	Diptera	Chironomidae	Chironominae	Dicrotendipes	Dicrotendipes tritomus	Angela Telfer	RRMFD693-15	BOLD:AAC0706	pending	21-May-2015	Site 3 - South Field, forest edge	43.37	-80.364	312
Arthropoda	Insecta	Diptera	Chironomidae	Chironominae	Dicrotendipes	Dicrotendipes tritomus	Angela Telfer	RRMFE683-15	BOLD:AAC0706	pending	27-May-2015	Site 3 - South Field, forest edge	43.37	-80.364	312
Arthropoda	Insecta	Diptera	Chironomidae	Chironominae	Dicrotendipes	Dicrotendipes tritomus	Angela Telfer	RRMFI2302-15	BOLD:AAC0706	pending	24-Jun-2015	Site 3 - South Field, forest edge	43.37	-80.364	312
Arthropoda	Insecta	Diptera	Chironomidae	Chironominae	Dicrotendipes	Dicrotendipes tritomus	Angela Telfer	RRMFG658-15	BOLD:AAC0706	pending	11-Jun-2015	Site 3 - South Field, forest edge	43.3705	-80.3641	312
Arthropoda	Insecta	Diptera	Chironomidae	Chironominae	Dicrotendipes	Dicrotendipes tritomus	Angela Telfer	RRMFE1190-15	BOLD:AAC0706	pending	27-May-2015	Site 3 - South Field, forest edge	43.37	-80.364	312
Arthropoda	Insecta	Diptera	Chironomidae	Chironominae	Dicrotendipes	Dicrotendipes tritomus	Angela Telfer	RRMFE919-15	BOLD:AAC0706	pending	27-May-2015	Site 3 - South Field, forest edge	43.37	-80.364	312
Arthropoda	Insecta	Diptera	Chironomidae	Chironominae	Dicrotendipes	Dicrotendipes tritomus	Angela Telfer	RRSSA3268-15	BOLD:AAC0706	pending	27-May-2015	Site 1 - Field Edge Forest	43.374	-80.354	332
Arthropoda	Insecta	Diptera	Chironomidae	Chironominae	Dicrotendipes	Dicrotendipes tritomus	Angela Telfer	RRMFG1003-15	BOLD:AAC0706	pending	11-Jun-2015	Site 3 - South Field, forest edge	43.3705	-80.3641	312
Arthropoda	Insecta	Diptera	Chironomidae	Chironominae	Dicrotendipes	Dicrotendipes tritomus	Angela Telfer	RRMFE1417-15	BOLD:AAC0706	pending	27-May-2015	Site 3 - South Field, forest edge	43.37	-80.364	312
Arthropoda	Insecta	Diptera	Chironomidae	Chironominae	Dicrotendipes	Dicrotendipes tritomus	Angela Telfer	RRBPA063-15	BOLD:AAC0706	pending	01-May-2015	Site 4 - Blair Flats, unburned prairie	43.385	-80.369	264
Arthropoda	Insecta	Diptera	Chironomidae	Chironominae	Dicrotendipes	Dicrotendipes tritomus	Angela Telfer	RRMFG1193-15	BOLD:AAC0706	pending	11-Jun-2015	Site 3 - South Field, forest edge	43.3705	-80.3641	312
Arthropoda	Insecta	Diptera	Chironomidae	Chironominae	Dicrotendipes	Dicrotendipes tritomus	Angela Telfer	RRMPC1278-15	BOLD:AAC0706	pending	14-May-2015	Site 4 - Blair Flats, unburned prairie	43.385	-80.369	264
Arthropoda	Insecta	Diptera	Chironomidae	Chironominae	Dicrotendipes	Dicrotendipes tritomus	Angela Telfer	RRSSA3455-15	BOLD:AAC0706	pending	27-May-2015	Site 1 - Field Edge Forest	43.374	-80.354	332
Arthropoda	Insecta	Diptera	Chironomidae	Chironominae	Dicrotendipes	Dicrotendipes tritomus	Angela Telfer	RRMFD874-15	BOLD:AAC0706	pending	21-May-2015	Site 3 - South Field, forest edge	43.37	-80.364	312
Arthropoda	Insecta	Diptera	Chironomidae	Chironominae	Dicrotendipes	Dicrotendipes tritomus	Angela Telfer	RRMFE1537-15	BOLD:AAC0706	pending	27-May-2015	Site 3 - South Field, forest edge	43.37	-80.364	312
Arthropoda	Insecta	Diptera	Chironomidae	Chironominae	Dicrotendipes	Dicrotendipes tritomus	Angela Telfer	RRMFD957-15	BOLD:AAC0706	pending	21-May-2015	Site 3 - South Field, forest edge	43.37	-80.364	312
Arthropoda	Insecta	Diptera	Chironomidae	Chironominae	Dicrotendipes	Dicrotendipes tritomus	Angela Telfer	RRMPC1285-15	BOLD:AAC0706	pending	14-May-2015	Site 4 - Blair Flats, unburned prairie	43.385	-80.369	264
Arthropoda	Insecta	Diptera	Chironomidae	Chironominae	Dicrotendipes	Dicrotendipes tritomus	Angela Telfer	RRMFE885-15	BOLD:AAC0706	pending	27-May-2015	Site 3 - South Field, forest edge	43.37	-80.364	312
Arthropoda	Insecta	Diptera	Chironomidae	Chironominae	Dicrotendipes	Dicrotendipes tritomus	Angela Telfer	RRMFE1396-15	BOLD:AAC0706	pending	27-May-2015	Site 3 - South Field, forest edge	43.37	-80.364	312
Arthropoda	Insecta	Diptera	Chironomidae	Chironominae	Dicrotendipes	Dicrotendipes tritomus	Angela Telfer	RRMFE1251-15	BOLD:AAC0706	pending	27-May-2015	Site 3 - South Field, forest edge	43.37	-80.364	312
Arthropoda	Insecta	Diptera	Chironomidae	Chironominae	Dicrotendipes	Dicrotendipes tritomus	Angela Telfer	RRMFE109-15	BOLD:AAC0706	pending	27-May-2015	Site 3 - South Field, forest edge	43.37	-80.364	312
Arthropoda	Insecta	Diptera	Chironomidae	Chironominae	Dicrotendipes	Dicrotendipes tritomus	Angela Telfer	RRMFG2569-15	BOLD:AAC0706	pending	11-Jun-2015	Site 3 - South Field, forest edge	43.37	-80.364	312
Arthropoda	Insecta	Diptera	Chironomidae	Chironominae	Dicrotendipes	Dicrotendipes tritomus	Angela Telfer	RRMFG1838-15	BOLD:AAC0706	pending	11-Jun-2015	Site 3 - South Field, forest edge	43.3705	-80.3641	312
Arthropoda	Insecta	Diptera	Chironomidae	Chironominae	Dicrotendipes	Dicrotendipes tritomus	Angela Telfer	RRMFG1207-15	BOLD:AAC0706	pending	11-Jun-2015	Site 3 - South Field, forest edge	43.3705	-80.3641	312
Arthropoda	Insecta	Diptera	Chironomidae	Chironominae	Dicrotendipes	Dicrotendipes tritomus	Angela Telfer	RRMFE1871-15	BOLD:AAC0706	pending	27-May-2015	Site 3 - South Field, forest edge	43.3705	-80.3641	312
Arthropoda	Insecta	Diptera	Chironomidae	Chironominae	Dicrotendipes	Dicrotendipes tritomus	Angela Telfer	RRMFG971-15	BOLD:AAC0706	pending	11-Jun-2015	Site 3 - South Field, forest edge	43.3705	-80.3641	312
Arthropoda	Insecta	Diptera	Chironomidae	Chironominae	Dicrotendipes	Dicrotendipes tritomus	Angela Telfer	RRMFE1552-15	BOLD:AAC0706	pending	27-May-2015	Site 3 - South Field, forest edge	43.37	-80.364	312
Arthropoda	Insecta	Diptera	Chironomidae	Chironominae	Dicrotendipes	Dicrotendipes tritomus	Angela Telfer	RRMFE845-15	BOLD:AAC0706	pending	27-May-2015	Site 3 - South Field, forest edge	43.37	-80.364	312
Arthropoda	Insecta	Diptera	Chironomidae	Chironominae	Dicrotendipes	Dicrotendipes tritomus	Angela Telfer	RRSSA779-15	BOLD:AAC0706	pending	29-May-2015	Site 1 - Field Edge Forest	43.374	-80.354	332
Arthropoda	Insecta	Diptera	Chironomidae	Chironominae	Dicrotendipes	Dicrotendipes tritomus	Angela Telfer	RRMFE702-15	BOLD:AAC0706	pending	27-May-2015	Site 3 - South Field, forest edge	43.37	-80.364	312
Arthropoda	Insecta	Diptera	Chironomidae	Chironominae	Dicrotendipes	Dicrotendipes tritomus	Angela Telfer	RRMFE855-15	BOLD:AAC0706	pending	27-May-2015	Site 3 - South Field, forest edge	43.37	-80.364	312
Arthropoda	Insecta	Diptera	Chironomidae	Chironominae	Dicrotendipes	Dicrotendipes tritomus	Angela Telfer	RRMFI2674-15	BOLD:AAC0706	pending	24-Jun-2015	Site 3 - South Field, forest edge	43.37	-80.364	312
Arthropoda	Insecta	Diptera	Chironomidae	Chironominae	Dicrotendipes	Dicrotendipes tritomus	Angela Telfer	RRMFD718-15	BOLD:AAC0706	pending	21-May-2015	Site 3 - South Field, forest edge	43.37	-80.364	312
Arthropoda	Insecta	Diptera	Chironomidae	Chironominae	Dicrotendipes	Dicrotendipes tritomus	Angela Telfer	RRSSA3263-15	BOLD:AAC0706	pending	27-May-2015	Site 1 - Field Edge Forest	43.374	-80.354	332
Arthropoda	Insecta	Diptera	Chironomidae	Chironominae	Dicrotendipes	Dicrotendipes tritomus	Angela Telfer	RRMFD911-15	BOLD:AAC0706	pending	21-May-2015	Site 3 - South Field, forest edge	43.37	-80.364	312
Arthropoda	Insecta	Diptera	Chironomidae	Chironominae	Dicrotendipes	Dicrotendipes tritomus	Angela Telfer	RRSSA3324-15	BOLD:AAC0706	pending	27-May-2015	Site 1 - Field Edge Forest	43.374	-80.354	332
Arthropoda	Insecta	Diptera	Chironomidae	Chironominae	Dicrotendipes	Dicrotendipes tritomus	Angela Telfer	RRMFE1752-15	BOLD:AAC0706	pending	27-May-2015	Site 3 - South Field, forest edge	43.3705	-80.3641	312
Arthropoda	Insecta	Diptera	Chironomidae	Chironominae	Dicrotendipes	Dicrotendipes tritomus	Angela Telfer	RRMFE067-15	BOLD:AAC0706	pending	27-May-2015	Site 3 - South Field, forest edge	43.37	-80.364	312
Arthropoda	Insecta	Diptera	Chironomidae	Chironominae	Dicrotendipes	Dicrotendipes tritomus	Angela Telfer	RRMFD1299-15	BOLD:AAC0706	pending	21-May-2015	Site 3 - South Field, forest edge	43.37	-80.364	312
Arthropoda	Insecta	Diptera	Chironomidae	Chironominae	Dicrotendipes	Dicrotendipes tritomus	Angela Telfer	RRMFG1263-15	BOLD:AAC0706	pending	11-Jun-2015	Site 3 - South Field, forest edge	43.3705	-80.3641	312
Arthropoda	Insecta	Diptera	Chironomidae	Chironominae	Dicrotendipes	Dicrotendipes tritomus	Angela Telfer	RRMFG760-15	BOLD:AAC0706	pending	11-Jun-2015	Site 3 - South Field, forest edge	43.3705	-80.3641	312
Arthropoda	Insecta	Diptera	Chironomidae	Chironominae	Dicrotendipes	Dicrotendipes tritomus	Angela Telfer	RRMFD1148-15	BOLD:AAC0706	pending	21-May-2015	Site 3 - South Field, forest edge	43.37	-80.364	312
Arthropoda	Insecta	Diptera	Chironomidae	Chironominae	Dicrotendipes	Dicrotendipes tritomus	Angela Telfer	RRSSA940-15	BOLD:AAC0706	pending	31-May-2015	Site 1 - Field Edge Forest	43.374	-80.354	332
Arthropoda	Insecta	Diptera	Chironomidae	Chironominae	Dicrotendipes	Dicrotendipes tritomus	Angela Telfer	RRSSA1106-15	BOLD:AAC0706	pending	31-May-2015	Site 1 - Field Edge Forest	43.374	-80.354	332
Arthropoda	Insecta	Diptera	Chironomidae	Chironominae	Dicrotendipes	Dicrotendipes tritomus	Angela Telfer	RRSSA687-15	BOLD:AAC0706	pending	31-May-2015	Site 1 - Field Edge Forest	43.374	-80.354	332
Arthropoda	Insecta	Diptera	Chironomidae	Chironominae	Dicrotendipes	Dicrotendipes tritomus	Angela Telfer	RRMFG1317-15	BOLD:AAC0706	pending	11-Jun-2015	Site 3 - South Field, forest edge	43.3705	-80.3641	312
Arthropoda	Insecta	Diptera	Chironomidae	Chironominae	Dicrotendipes	Dicrotendipes tritomus	Angela Telfer	RRMFE481-15	BOLD:AAC0706	pending	27-May-2015	Site 3 - South Field, forest edge	43.37	-80.364	312
Arthropoda	Insecta	Diptera	Chironomidae	Chironominae	Dicrotendipes	Dicrotendipes tritomus	Angela Telfer	RRMFE866-15	BOLD:AAC0706	pending	27-May-2015	Site 3 - South Field, forest edge	43.37	-80.364	312
Arthropoda	Insecta	Diptera	Chironomidae	Chironominae	Dicrotendipes	Dicrotendipes tritomus	Angela Telfer	RRMFE2013-15	BOLD:AAC0706	pending	27-May-2015	Site 3 - South Field, forest edge	43.3705	-80.3641	312
Arthropoda	Insecta	Diptera	Chironomidae	Chironominae	Dicrotendipes	Dicrotendipes tritomus	Angela Telfer	RRMFD876-15	BOLD:AAC0706	pending	21-May-2015	Site 3 - South Field, forest edge	43.37	-80.364	312
Arthropoda	Insecta	Diptera	Chironomidae	Chironominae	Dicrotendipes	Dicrotendipes tritomus	Angela Telfer	RRMFE1867-15	BOLD:AAC0706	pending	27-May-2015	Site 3 - South Field, forest edge	43.3705	-80.3641	312
Arthropoda	Insecta	Diptera	Chironomidae	Chironominae	Dicrotendipes	Dicrotendipes tritomus	Angela Telfer	RRMFE1467-15	BOLD:AAC0706	pending	27-May-2015	Site 3 - South Field, forest edge	43.37	-80.364	312
Arthropoda	Insecta	Diptera	Chironomidae	Chironominae	Dicrotendipes	Dicrotendipes tritomus	Angela Telfer	RRMFE1989-15	BOLD:AAC0706	pending	27-May-2015	Site 3 - South Field, forest edge	43.3705	-80.3641	312
Arthropoda	Insecta	Diptera	Chironomidae	Chironominae	Dicrotendipes	Dicrotendipes tritomus	Angela Telfer	RRMFE1485-15	BOLD:AAC0706	pending	27-May-2015	Site 3 - South Field, forest edge	43.37	-80.364	312
Arthropoda	Insecta	Diptera	Chironomidae	Chironominae	Dicrotendipes	Dicrotendipes tritomus	Angela Telfer	RRMFE2003-15	BOLD:AAC0706	pending	27-May-2015	Site 3 - South Field, forest edge	43.3705	-80.3641	312
Arthropoda	Insecta	Diptera	Chironomidae	Chironominae	Dicrotendipes	Dicrotendipes tritomus	Angela Telfer	RRMFG735-15	BOLD:AAC0706	pending	11-Jun-2015	Site 3 - South Field, forest edge	43.3705	-80.3641	312
Arthropoda	Insecta	Diptera	Chironomidae	Chironominae	Dicrotendipes	Dicrotendipes tritomus	Angela Telfer	RRMFG776-15	BOLD:AAC0706	pending	11-Jun-2015	Site 3 - South Field, forest edge	43.3705	-80.3641	312
Arthropoda	Insecta	Diptera	Chironomidae	Chironominae	Dicrotendipes	Dicrotendipes tritomus	Angela Telfer	RRMFE2007-15	BOLD:AAC0706	pending	27-May-2015	Site 3 - South Field, forest edge	43.3705	-80.3641	312
Arthropoda	Insecta	Diptera	Chironomidae	Chironominae	Dicrotendipes	Dicrotendipes tritomus	Angela Telfer	RRMFI1884-15	BOLD:AAC0706	pending	24-Jun-2015	Site 3 - South Field, forest edge	43.37	-80.364	312
Arthropoda	Insecta	Diptera	Chironomidae	Chironominae	Dicrotendipes	Dicrotendipes tritomus	Angela Telfer	RRSSA3228-15	BOLD:AAC0706	pending	27-May-2015	Site 1 - Field Edge Forest	43.374	-80.354	332
Arthropoda	Insecta	Diptera	Chironomidae	Chironominae	Dicrotendipes	Dicrotendipes tritomus	Angela Telfer	RRSSA3245-15	BOLD:AAC0706	pending	27-May-2015	Site 1 - Field Edge Forest	43.374	-80.354	332
Arthropoda	Insecta	Diptera	Chironomidae	Chironominae	Dicrotendipes	Dicrotendipes tritomus	Angela Telfer	RRMFE1966-15	BOLD:AAC0706	pending	27-May-2015	Site 3 - South Field, forest edge	43.3705	-80.3641	312
Arthropoda	Insecta	Diptera	Chironomidae	Chironominae	Dicrotendipes	Dicrotendipes tritomus	Angela Telfer	RRSSA3416-15	BOLD:AAC0706	pending	27-May-2015	Site 1 - Field Edge Forest	43.374	-80.354	332
Arthropoda	Insecta	Diptera	Chironomidae	Chironominae	Dicrotendipes	Dicrotendipes tritomus	Angela Telfer	RRMFD814-15	BOLD:AAC0706	pending	21-May-2015	Site 3 - South Field, forest edge	43.37	-80.364	312
Arthropoda	Insecta	Diptera	Chironomidae	Chironominae	Dicrotendipes	Dicrotendipes tritomus	Angela Telfer	RRSSA1163-15	BOLD:AAC0706	pending	31-May-2015	Site 1 - Field Edge Forest	43.374	-80.354	332
Arthropoda	Insecta	Diptera	Chironomidae	Chironominae	Dicrotendipes	Dicrotendipes tritomus	Angela Telfer	RRMFE1939-15	BOLD:AAC0706	pending	27-May-2015	Site 3 - South Field, forest edge	43.3705	-80.3641	312
Arthropoda	Insecta	Diptera	Chironomidae	Chironominae	Dicrotendipes	Dicrotendipes tritomus	Angela Telfer	RRSSA552-15	BOLD:AAC0706	pending	29-May-2015	Site 1 - Field Edge Forest	43.374	-80.354	332
Arthropoda	Insecta	Diptera	Chironomidae	Chironominae	Dicrotendipes	Dicrotendipes tritomus	Angela Telfer	RRMPC1238-15	BOLD:AAC0706	pending	14-May-2015	Site 4 - Blair Flats, unburned prairie	43.385	-80.369	264
Arthropoda	Insecta	Diptera	Chironomidae	Chironominae	Dicrotendipes	Dicrotendipes tritomus	Angela Telfer	RRMFE1827-15	BOLD:AAC0706	pending	27-May-2015	Site 3 - South Field, forest edge	43.3705	-80.3641	312
Arthropoda	Insecta	Diptera	Chironomidae	Chironominae	Dicrotendipes	Dicrotendipes tritomus	Angela Telfer	RRMFG1250-15	BOLD:AAC0706	pending	11-Jun-2015	Site 3 - South Field, forest edge	43.3705	-80.3641	312
Arthropoda	Insecta	Diptera	Chironomidae	Chironominae	Dicrotendipes	Dicrotendipes tritomus	Angela Telfer	RRMFD1076-15	BOLD:AAC0706	pending	21-May-2015	Site 3 - South Field, forest edge	43.37	-80.364	312
Arthropoda	Insecta	Diptera	Chironomidae	Chironominae	Dicrotendipes	Dicrotendipes tritomus	Angela Telfer	RRMFE1842-15	BOLD:AAC0706	pending	27-May-2015	Site 3 - South Field, forest edge	43.3705	-80.3641	312
Arthropoda	Insecta	Diptera	Chironomidae	Chironominae	Dicrotendipes	Dicrotendipes tritomus	Angela Telfer	RRMFE1195-15	BOLD:AAC0706	pending	27-May-2015	Site 3 - South Field, forest edge	43.37	-80.364	312
Arthropoda	Insecta	Diptera	Chironomidae	Chironominae	Dicrotendipes	Dicrotendipes tritomus	Angela Telfer	RRSSA849-15	BOLD:AAC0706	pending	29-May-2015	Site 1 - Field Edge Forest	43.374	-80.354	332
Arthropoda	Insecta	Diptera	Chironomidae	Chironominae	Dicrotendipes	Dicrotendipes tritomus	Angela Telfer	RRMFD794-15	BOLD:AAC0706	pending	21-May-2015	Site 3 - South Field, forest edge	43.37	-80.364	312
Arthropoda	Insecta	Diptera	Chironomidae	Chironominae	Dicrotendipes	Dicrotendipes tritomus	Angela Telfer	RRMFE1443-15	BOLD:AAC0706	pending	27-May-2015	Site 3 - South Field, forest edge	43.37	-80.364	312
Arthropoda	Insecta	Diptera	Chironomidae	Chironominae	Dicrotendipes	Dicrotendipes tritomus	Angela Telfer	RRMFC1570-15	BOLD:AAC0706	pending	14-May-2015	Site 3 - South Field, forest edge	43.37	-80.364	312
Arthropoda	Insecta	Diptera	Chironomidae	Chironominae	Dicrotendipes	Dicrotendipes tritomus	Angela Telfer	RRMFG2574-15	BOLD:AAC0706	pending	11-Jun-2015	Site 3 - South Field, forest edge	43.37	-80.364	312
Arthropoda	Insecta	Diptera	Chironomidae	Chironominae	Dicrotendipes	Dicrotendipes tritomus	Angela Telfer	RRSSA131-15	BOLD:AAC0706	pending	25-May-2015	Site 1 - Field Edge Forest	43.374	-80.354	332
Arthropoda	Insecta	Diptera	Chironomidae	Chironominae	Dicrotendipes	Dicrotendipes tritomus	Angela Telfer	RRMFD1304-15	BOLD:AAC0706	pending	21-May-2015	Site 3 - South Field, forest edge	43.37	-80.364	312
Arthropoda	Insecta	Diptera	Chironomidae	Chironominae	Dicrotendipes	Dicrotendipes tritomus	Angela Telfer	RRSSA3418-15	BOLD:AAC0706	pending	27-May-2015	Site 1 - Field Edge Forest	43.374	-80.354	332
Arthropoda	Insecta	Diptera	Chironomidae	Chironominae	Dicrotendipes	Dicrotendipes tritomus	Angela Telfer	RRSSA3468-15	BOLD:AAC0706	pending	27-May-2015	Site 1 - Field Edge Forest	43.374	-80.354	332
Arthropoda	Insecta	Diptera	Chironomidae	Chironominae	Dicrotendipes	Dicrotendipes tritomus	Angela Telfer	RRMFE1996-15	BOLD:AAC0706	pending	27-May-2015	Site 3 - South Field, forest edge	43.3705	-80.3641	312
Arthropoda	Insecta	Diptera	Chironomidae	Chironominae	Dicrotendipes	Dicrotendipes tritomus	Angela Telfer	RRMFD896-15	BOLD:AAC0706	pending	21-May-2015	Site 3 - South Field, forest edge	43.37	-80.364	312
Arthropoda	Insecta	Diptera	Chironomidae	Chironominae	Dicrotendipes	Dicrotendipes tritomus	Angela Telfer	RRMFE1242-15	BOLD:AAC0706	pending	27-May-2015	Site 3 - South Field, forest edge	43.37	-80.364	312
Arthropoda	Insecta	Diptera	Chironomidae	Chironominae	Dicrotendipes	Dicrotendipes tritomus	Angela Telfer	RRSSA3573-15	BOLD:AAC0706	pending	27-May-2015	Site 1 - Field Edge Forest	43.374	-80.354	332
Arthropoda	Insecta	Diptera	Chironomidae	Chironominae	Dicrotendipes	Dicrotendipes tritomus	Angela Telfer	RRMFG671-15	BOLD:AAC0706	pending	11-Jun-2015	Site 3 - South Field, forest edge	43.3705	-80.3641	312
Arthropoda	Insecta	Diptera	Chironomidae	Chironominae	Dicrotendipes	Dicrotendipes tritomus	Angela Telfer	RRSSA913-15	BOLD:AAC0706	pending	31-May-2015	Site 1 - Field Edge Forest	43.374	-80.354	332
[truncated: 26,790 more rows]
