# Supplementary material for: Biodiversity inventories in high gear: DNA barcoding facilitates a rapid biotic survey of a temperate nature reserve
Source: Biodivers Data J. 2015 Aug 30;(3):e6313. doi: 10.3897/BDJ.3.e6313 (PMC4568406; doi:10.3897/BDJ.3.e6313)
Supplement: Supplementary material 6 — Contributors list [file biodiversity_data_journal-3-e6313-s006.xls]

## Sheet: Sheet1
Name	E-Mail	Institution	City	Country
Abinah Thevanayagam	athevana@mail.uoguelph.ca	Biodiversity Institute of Ontario	Guelph	Canada
Adrian Boskovic	abosko01@mail.uoguelph.ca	Biodiversity Institute of Ontario	Guelph	Canada
Alex Borisenko	aborisen@uoguelph.ca	Biodiversity Institute of Ontario	Guelph	Canada
Alex Cadel	cadel.alex@gmail.com	University of Waterloo	Waterloo	Canada
Allison Brown	abrown21@uoguelph.ca	Biodiversity Institute of Ontario	Guelph	Canada
Anais Pages	anais.pages2@gmail.com	Université de Montpellier	Montpellier	France
Angela Telfer	atelfer@uoguelph.ca	Biodiversity Institute of Ontario	Guelph	Canada
Anibal H. Castillo	acastill@uoguelph.ca	Biodiversity Institute of Ontario	Guelph	Canada
Annegret Nicolai	annegret.nicolai@univ-rennes1.fr	UMR 6553 EcoBio, Université Rennes 1, France	Rennes	France
Barb Mockford	mockford@kw.igs.net	rare Charitable Research Reserve (Affiliate of)	Cambridge	Canada
Belén Bukowski	belenbukowski@gmail.com	Museo Argentino de Ciencias Naturales "Bernardino Rivadavia" (MACN-CONICET)	Buenos Aires	Argentina
Bill Wilson	wgwils@gmail.com	rare Charitable Research Reserve (Affiliate of)	Cambridge	Canada
Brock Trojahn	brock.trojahn@raresites.org	rare Charitable Research Reserve	Cambridge	Canada
Carole Ann Lacroix	botcal@uoguelph.ca	Biodiversity Institute of Ontario	Guelph	Canada
Chris Brimblecombe	brimby@gmail.com	University of Waikato	Hamilton	New Zealand
Chris Hay	chay9@uwo.ca	The University of Western Ontario	London	Canada
Chris Ho	hoc@uoguelph.ca	Biodiversity Institute of Ontario	Guelph	Canada
Claudia Steinke	csteinke@uoguelph.ca	Biodiversity Institute of Ontario	Guelph	Canada
Connor Warne	cwarne@uoguelph.ca	Biodiversity Institute of Ontario	Guelph	Canada
Cristina Garrido Cortes	cgarrido@mail.uoguelph.ca	University of Guelph	Guelph	Canada
Crystal Sobel	csobel@uoguelph.ca	Biodiversity Institute of Ontario	Guelph	Canada
Daniel Engelking	dengelki@mail.uoguelph.ca	Biodiversity Institute of Ontario	Guelph	Canada
Danielle Wright	dwrigh06@uoguelph.ca	Biodiversity Institute of Ontario	Guelph	Canada
Dario A. Lijtmaer	dariolijtmaer@gmail.com	Museo Argentino de Ciencias Naturales "Bernardino Rivadavia" (MACN-CONICET)	Buenos Aires	Argentina
David Gascoigne	theospreynest@sympatico.ca	rare Charitable Research Reserve (Affiliate of)	Cambridge	Canada
David Hernandez Martich	hernandezmartich@yahoo.com	Universidad Autonoma de Santo Domingo DR	Santo Domingo	Dominican Republic
Derek Morningstar	myotistar@gmail.com	Myotistar	Cambridge	Canada
Dirk Neumann	dirk.neumann@zsm.mwn.de	SNSB, Zoologische Staatssammlung Muenchen	Munich	Germany
Dirk Steinke	dsteinke@uoguelph.ca	Biodiversity Institute of Ontario	Guelph	Canada
Donna DeBruin	marco_donna@sympatico.ca	rare Charitable Research Reserve (Affiliate of)	Cambridge	Canada
Dylan Dobias	dylan.dobias@hotmail.com	University of Guelph	Guelph	Canada
Elizabeth Sears	esears@uoguelph.ca	Biodiversity Institute of Ontario	Guelph	Canada
Ellen Richard	ericha03@mail.uoguelph.ca	University of Guelph	Guelph	Canada
Emily Damstra	esdamstra@gmail.com	rare Charitable Research Reserve (Affiliate of)	Cambridge	Canada
Evgeny Zakharov	zakharov@uoguelph.ca	Biodiversity Institute of Ontario	Guelph	Canada
Gemma Collins	gec9@students.waikato.ac.nz	University of Waikato	Hamilton	New Zealand
Gergin Blagoev	gblagoev@uoguelph.ca	Biodiversity Institute of Ontario	Guelph	Canada
Gerrie Grainge	ggrainge@rogers.com	rare Charitable Research Reserve (Affiliate of)	Cambridge	Canada
Glenn Mockford	mockford@kw.igs.net	rare Charitable Research Reserve (Affiliate of)	Cambridge	Canada
Graham Ansell	gansell@mail.uoguelph.ca	Biodiversity Institute of Ontario	Guelph	Canada
Greg Meredith	gmeredith@grandriver.ca	Grand River Conservation Authority	Guelph	Canada
Ian Hogg	hogg@waikato.ac.nz	University of Waikato	Hamilton	New Zealand
Jaclyn McKeown	mccormij@uoguelph.ca	Biodiversity Institute of Ontario	Guelph	Canada
Janet Topan	jtopan@uoguelph.ca	Biodiversity Institute of Ontario	Guelph	Canada
Jason Bracey	jason_bracey@wrdsb.on.ca	rare Charitable Research Reserve (Affiliate of)	Cambridge	Canada
Jayme Sones	jsones@uoguelph.ca	Biodiversity Institute of Ontario	Guelph	Canada
Jenna Quinn	jenna.quinn@raresites.org	rare Charitable Research Reserve	Cambridge	Canada
Jeremy deWaard	dewaardj@uoguelph.ca	Biodiversity Institute of Ontario	Guelph	Canada
Jerry Guenther	jerg@rogers.com	rare Charitable Research Reserve (Affiliate of)	Cambridge	Canada
Jesse Sills-Gilligan	jsillsgi@mail.uoguelph.ca	Biodiversity Institute of Ontario	Guelph	Canada
Jose Fernandez Triana	jftriana@uoguelph.ca	Canadian National Collection of Insects, Arachnids and Nematodes	Ottawa	Canada
Joseph Addesi	addesij@mail.uoguelph.ca	Biodiversity Institute of Ontario	Guelph	Canada
Joshua Persi	jpersi@mail.uoguelph.ca	Biodiversity Institute of Ontario	Guelph	Canada
Kara Layton	klayton@uoguelph.ca	The University of Western Australia	Perth	Australia
Kareina D'Souza	dsouzak@mail.uoguelph.ca	Biodiversity Institute of Ontario	Guelph	Canada
Kate Perez	kperez@uoguelph.ca	Biodiversity Institute of Ontario	Guelph	Canada
Kencho Dorji	kencho.185@gmail.com	National Biodiversity Centre	Thimphu	Bhutan
Kevin Grundy	kevin.grundy@economical.com	rare Charitable Research Reserve (Affiliate of)	Cambridge	Canada
Kirsti Nghidinwa	knghidinwa@met.na	Ministry of Environment and Tourism in Namibia	Windhoek	Namibia
Kylee Ronnenberg	kronnenb@mail.uoguelph.ca	Biodiversity Institute of Ontario	Guelph	Canada
Kyung Min Lee	kyungmin.lee@oulu.fi	University of Oulu	Oulu	Finland
Linxi Xie	linxixie33@yahoo.com	The University of Western Ontario	London	Canada
Liuqiong Lu	llu@uoguelph.ca	Biodiversity Institute of Ontario	Guelph	Canada
Lyubomir Penev	lyubo.penev@gmail.com	Bulgarian Academy of Sciences	Sofia	Bulgaria
Mailyn Gonzalez	magonzalez@humboldt.org.co	Alexander von Humboldt Biological Resources Research Institute	Bogotá	Colombia
Marco DeBruin	marco_donna@sympatico.ca	rare Charitable Research Reserve (Affiliate of)	Cambridge	Canada
Margaret Rosati	RosatiME@si.edu	Smithsonian National Museum of Natural History	Washington	United States of America
Mari Kekkonen	kekkonen@uoguelph.ca	Biodiversity Institute of Ontario	Guelph	Canada
Marianne Iskandar	miskanda@uoguelph.ca	Biodiversity Institute of Ontario	Guelph	Canada
Marko Mutanen	marko.mutanen@oulu.fi	University of Oulu	Oulu	Finland
Maryam Fatahi	maryamfatahi34@gmail.com	Biodiversity Institute of Ontario	Guelph	Canada
Masha Kuzmina	kuzminam@uoguelph.ca	Biodiversity Institute of Ontario	Guelph	Canada
Mikko Pentinsaari	mikko.pentinsaari@oulu.fi	University of Oulu	Oulu	Finland
Miriam Bauman	miriamba@sympatico.ca	rare Charitable Research Reserve (Affiliate of)	Cambridge	Canada
Monica Young	myoung02@uoguelph.ca	Biodiversity Institute of Ontario	Guelph	Canada
Nadya Nikolova	nikolova@uoguelph.ca	Biodiversity Institute of Ontario	Guelph	Canada
Natalia Ivanova	nivanova@uoguelph.ca	Biodiversity Institute of Ontario	Guelph	Canada
Nathaniel Jones	nathanie@mail.uoguelph.ca	Biodiversity Institute of Ontario	Guelph	Canada
Nimalka Weerasuriya	Nweerasu@uwo.ca	The University of Western Ontario	London	Canada
Norman Monkhouse	nmonkhou@uoguelph.ca	Biodiversity Institute of Ontario	Guelph	Canada
Pablo D. Lavinia	pablodlo23@gmail.com	Museo Argentino de Ciencias Naturales "Bernardino Rivadavia" (MACN-CONICET)	Buenos Aires	Argentina
Paul Hebert	phebert@uoguelph.ca	Biodiversity Institute of Ontario	Guelph	Canada
Paul Jannetta	pjannett@uoguelph.ca	Biodiversity Institute of Ontario	Guelph	Canada
Priscila E. Hanisch	hanisch.priscila@gmail.com	Museo Argentino de Ciencias Naturales "Bernardino Rivadavia" (MACN-CONICET)	Buenos Aires	Argentina
R. Troy McMullin	rmcmulli@uoguelph.ca	Biodiversity Institute of Ontario Herbarium	Guelph	Canada
Rachael Derbyshire	derbrach7@gmail.com	Biodiversity Institute of Ontario	Guelph	Canada
Rafael Ojeda Flores	ojeda_rafael@yahoo.com.mx	Universidad Nacional Autónoma de México	Mexico City	Mexico
Raphaëlle Mouttet	raphaelle.mouttet@anses.fr	ANSES, Laboratoire de la Santé des Végétaux	Montferrier sur Lez	France
Reid Vender	rvender@uoguelph.ca	Biodiversity Institute of Ontario	Guelph	Canada
Renee Labbee	rlabbe@uoguelph.ca	Biodiversity Institute of Ontario	Guelph	Canada
Robert Forsyth	rforsyth@telus.net	New Brunswick Museum	Saint John	Canada
Rob Lauder	D27@live.ca	London Homeopathy	London	Canada
Rodolphe Rougerie	rrougeri@gmail.com	Muséum national d'Histoire Naturelle, Paris	Paris	France
Ross Dickson	rossdickson1112@gmail.com	rare Charitable Research Reserve (Affiliate of)	Cambridge	Canada
Ruth Kroft	rkroft@sympatico.ca	rare Charitable Research Reserve (Affiliate of)	Cambridge	Canada
Scott Miller	MillerS@si.edu	Smithsonian National Museum of Natural History	Washington	United States of America
Shannon MacDonald	smacdo15@mail.uoguelph.ca	Biodiversity Institute of Ontario	Guelph	Canada
Sishir Panthi	panthi.sishir@gmail.com	Ministry of Forests and Soil Conservation	Kathmandu	Nepal
Stephanie Pedersen	spederse@uoguelph.ca	Biodiversity Institute of Ontario	Guelph	Canada
Stephanie Sobek-Swant	stephanie.sobek-swant@raresites.org	rare Charitable Research Reserve	Cambridge	Canada
Suresh Naik	snaik@uoguelph.ca	Biodiversity Institute of Ontario	Guelph	Canada
Tatsiana Lipinskaya	tatsiana.lipinskaya@gmail.com	Scientific and Practical Center for Bioresources, National Academy of Sciences of Belarus	Minsk	Belarus
Thanushi Eagalle	teagalle@uoguelph.ca	Biodiversity Institute of Ontario	Guelph	Canada
Thibaud Decaëns	thibaud.DECAENS@cefe.cnrs.fr	Université de Montpellier Centre d'Ecologie Fonctionnelle et Evolutive	Montpellier	France
Thibault Kosuth	kosuth.thibault@gmail.com	Université de Montpellier	Montpellier	France
Thomas Braukmann	tbraukma@uoguelph.ca	Biodiversity Institute of Ontario	Guelph	Canada
Tom Woodcock	tom.woodcock@raresites.org	rare Charitable Research Reserve	Cambridge	Canada
Tomas Roslin	tomas.roslin@helsinki.fi	University of Helsinki; Swedish University of Agricultural Sciences	Helsinki; Uppsala	Finland; Sweden
Tony Zammit	tzammit@grandriver.ca	Grand River Conservation Authority	Cambridge	Canada
Valerie Levesque-Beaudin	valerie@uoguelph.ca	Biodiversity Institute of Ontario	Guelph	Canada
Victoria Campbell	vecampbe@uoguelph.ca	Biodiversity Institute of Ontario	Guelph	Canada
Vlad Dinca	vdinca@uoguelph.ca	Biodiversity Institute of Ontario	Guelph	Canada
Vlada Peneva	vpeneva@ecolab.bas.bg	Bulgarian Academy of Sciences	Sofia	Bulgaria
