# Supplementary material for: Biodiversity inventories in high gear: DNA barcoding facilitates a rapid biotic survey of a temperate nature reserve
Source: Biodivers Data J. 2015 Aug 30;(3):e6313. doi: 10.3897/BDJ.3.e6313 (PMC4568406; doi:10.3897/BDJ.3.e6313)
Supplement: Supplementary material 7 — Human observations during rare BioBlitz [file biodiversity_data_journal-3-e6313-s007.xlsx]

## Sheet: Sightings
Sample #	Phylum	Class	Order	Family	Genus	Species	Common Name	Number	Latitude	Longitude	Site	Collector	Notes
RARE-Sight-00001	Chordata	Actinopterygii	Perciformes	Centrarchidae	Ambloplites	Ambloplites rupestris	Rock Bass		43.3842	-80.3538	Site 1	Nate Jones, Adrian Boskovic
RARE-Sight-00002	Chordata	Aves	Anseriformes	Anatidae	Anas	Anas platyrhynchos	Mallard	31	43.38	-80.35	rare Charitable Research Reserve (Partial Grand Trunk Trail, Woodland Trail, Partial Cliff and Alvars)	Ross Dickson; Bill Wilson & Jerry Guenther; Glenn & Barb Mockford; Marco & Donna DeBruin; Jason Bracey; David Gascoigne & Miriam Bauman; Tony Zammit; Ruth Kroft
RARE-Sight-00003	Chordata	Amphibia	Anura	Bufonidae	Anaxyrus	Anaxyrus americanus	American Toad	4	43.3799	-80.3483	Site 4; Partial Grand Trunk Trail, Woodland Trail, Partial Cliff and Alvars	F. Laberge; Marco, Donna DeBruin Ruth Kroft
RARE-Sight-00004	Chordata	Aves	Passeriformes	Bombycillidae	Bombycilla	Bombycilla cedrorum	Cedar Waxwing	33	43.38	-80.35	rare Charitable Research Reserve (Partial Grand Trunk Trail, Woodland Trail, Partial Cliff and Alvars)	Ross Dickson; Ruth Kroft; Glenn & Barb Mockford; Kevin Grundy; Marco & Donna DeBruin; Jason Bracey; David Gascoigne & Miriam Bauman; Belen Bukowski, Pablo D. Lavinia, Dario A. Lijtmaer; Tony Zammit
RARE-Sight-00005	Chordata	Aves	Anseriformes	Anatidae	Branta	Branta canadensis	Canada Goose	30	43.38	-80.35	rare Charitable Research Reserve (Partial Grand Trunk Trail, Woodland Trail, Partial Cliff and Alvars)	Ross Dickson; Glenn & Barb Mockford; Ruth Kroft; Kevin Grundy; Marco & Donna DeBruin; Jason Bracey; Bill Wilson & Jerry Guenther; David Gascoigne & Miriam Bauman; Belen Bukowski, Pablo D. Lavinia, Dario A. Lijtmaer; Tony Zammit
RARE-Sight-00006	Chordata	Aves	Passeriformes	Cardinalidae	Cardinalis	Cardinalis cardinalis	Northern Cardinal	9	43.38	-80.35	rare Charitable Research Reserve (Partial Grand Trunk Trail, Woodland Trail, Partial Cliff and Alvars)	Ross Dickson; Glenn & Barb Mockford; Kevin Grundy; Ruth Kroft; Marco & Donna DeBruin; Jason Bracey; Gerrie Grainge & Emily Damstra; David Gascoigne & Miriam Bauman; Belen Bukowski, Pablo D. Lavinia, Dario A. Lijtmaer
RARE-Sight-00007	Chordata	Aves	Passeriformes	Fringillidae	Carduelis	Carduelis tristis	American Goldfinch	37	43.38	-80.35	RARE Charitable Research Reserve	Ross Dickson; Glenn & Barb Mockford; Kevin Grundy; Ruth Kroft; Marco & Donna DeBruin; Jason Bracey; Gerrie Grainge & Emily Damstra; Bill Wilson & Jerry Guenther; David Gascoigne & Miriam Bauman; Belen Bukowski, Pablo D. Lavinia, Dario A. Lijtmaer; Tony Zammit
RARE-Sight-00008	Chordata	Aves	Falconiformes	Cathartidae	Cathartes	Cathartes aura	Turkey Vulture	6	43.38	-80.35	rare Charitable Research Reserve (Partial Grand Trunk Trail, Woodland Trail, Partial Cliff and Alvars)	Ross Dickson; Glenn & Barb Mockford; Ruth Kroft; Kevin Grundy; Marco & Donna DeBruin; Jason Bracey; Ross Dickson; Belen Bukowski, Pablo D. Lavinia, Dario A. Lijtmaer
RARE-Sight-00009	Chordata	Actinopterygii	Cypriniformes	Catostomidae	Catostomus	Catostomus commersonii	White Sucker		43.3842	-80.3538	Site 1	Nate Jones, Adrian Boskovic
RARE-Sight-00010	Arthropoda	Insecta	Lepidoptera	Nymphalidae	Cercyonis	Cercyonis pegala	Common Wood Nymph		43.3842	-80.3538	Site 1	V. Dinca
RARE-Sight-00011	Chordata	Aves	Apodiformes	Apodidae	Chaetura	Chaetura pelagica	Chimney Swift	4	43.38	-80.35	rare Charitable Research Reserve (Partial Grand Trunk Trail, Woodland Trail, Partial Cliff and Alvars)	Ross Dickson; Bill Wilson & Jerry Guenther; Marco & Donna DeBruin; Ruth Kroft
RARE-Sight-00012	Chordata	Aves	Cuculiformes	Cuculidae	Coccyzus	Coccyzus erythropthalmus	Black-billed Cuckoo	1	43.38	-80.35	rare Charitable Research Reserve (Partial Grand Trunk Trail, Woodland Trail, Partial Cliff and Alvars)	R. Dickson/ K. Grundy; Gerrie Grainge & Emily Damstra
RARE-Sight-00013	Chordata	Aves	Piciformes	Picidae	Colaptes	Colaptes auratus	Northern Flicker	2	43.38	-80.35	rare Charitable Research Reserve (Partial Grand Trunk Trail, Woodland Trail, Partial Cliff and Alvars)	Ross Dickson; Kevin Grundy; Ruth Kroft; Jason Bracey; Bill Wilson & Jerry Guenther; David Gascoigne & Miriam Bauman; Belen Bukowski, Pablo D. Lavinia, Dario A. Lijtmaer
RARE-Sight-00014	Arthropoda	Insecta	Lepidoptera	Pieridae	Colias	Colias philodice	Clouded Sulphur		43.3842	-80.3538	Site 1	V. Dinca
RARE-Sight-00015	Chordata	Aves	Passeriformes	Tyrannidae	Contopus	Contopus virens	Eastern Wood-Pewee	1	43.38	-80.35	rare Charitable Research Reserve (Partial Grand Trunk Trail, Woodland Trail, Partial Cliff and Alvars)	Ross Dickson; Glenn & Barb Mockford; Kevin Grundy; Tony Zammit; Marco & Donna DeBruin; Ruth Kroft
RARE-Sight-00016	Chordata	Aves	Passeriformes	Corvidae	Corvus	Corvus brachyrhynchos	American Crow	6	43.38	-80.35	rare Charitable Research Reserve (Partial Grand Trunk Trail, Woodland Trail, Partial Cliff and Alvars)	Ross Dickson; Glenn & Barb Mockford; Kevin Grundy; Ruth Kroft; Marco & Donna DeBruin; Jason Bracey; Gerrie Grainge & Emily Damstra; Bill Wilson & Jerry Guenther; David Gascoigne & Miriam Bauman; Belen Bukowski, Pablo D. Lavinia, Dario A. Lijtmaer
RARE-Sight-00017	Arthropoda	Insecta	Hymenoptera	Formicidae	Crematogaster	Crematogaster cerasi	None		43.3842	-80.3538	Site 1	Priscila Hanisch
RARE-Sight-00018	Chordata	Actinopterygii	Gasterosteiformes	Gasterosteidae	Culaea	Culaea inconstans	Brook stickleback		43.3842	-80.3538	Site 1	Nate Jones, Adrian Boskovic
RARE-Sight-00019	Chordata	Aves	Passeriformes	Corvidae	Cyanocitta	Cyanocitta cristata	Blue Jay	4	43.38	-80.35	rare Charitable Research Reserve (Partial Grand Trunk Trail, Woodland Trail, Partial Cliff and Alvars)	Ross Dickson; Kevin Grundy; Ruth Kroft; Marco & Donna DeBruin; Jason Bracey; Bill Wilson & Jerry Guenther; David Gascoigne & Miriam Bauman; Belen Bukowski, Pablo D. Lavinia, Dario A. Lijtmaer; Tony Zammit
RARE-Sight-00020	Arthropoda	Insecta	Lepidoptera	Nymphalidae	Danaus	Danaus plexippus	Monarch		43.38	-80.35	rare Charitable Research Reserve (Partial Grand Trunk Trail, Woodland Trail, Partial Cliff and Alvars)	Marco, Donna DeBruin Ruth Kroft
RARE-Sight-00021	Chordata	Aves	Passeriformes	Mimidae	Dumetella	Dumetella carolinensis	Gray Catbird	14	43.38	-80.35	rare Charitable Research Reserve (Partial Grand Trunk Trail, Woodland Trail, Partial Cliff and Alvars)	Ross Dickson; Glenn & Barb Mockford; Kevin Grundy; Ruth Kroft; Marco & Donna DeBruin; Jason Bracey; Gerrie Grainge & Emily Damstra; David Gascoigne & Miriam Bauman; Belen Bukowski, Pablo D. Lavinia, Dario A. Lijtmaer; Tony Zammit
RARE-Sight-00022	Chordata	Mammalia	Chiroptera	Vespertilionidae	Eptesicus	Eptesicus fuscus	Big Brown Bat		43.3773	-80.3408		Derek Morningstar	Acoustics only
RARE-Sight-00023	Chordata	Actinopterygii	Perciformes	Percidae	Etheostoma	Etheostoma blennioides	Greenside Darter		43.3842	-80.3538	Site 1	Nate Jones, Adrian Boskovic
RARE-Sight-00024	Chordata	Actinopterygii	Perciformes	Percidae	Etheostoma	Etheostoma nigrum	Johnny Darter		43.3842	-80.3538	Site 1	Nate Jones, Adrian Boskovic
RARE-Sight-00025	Chordata	Aves	Falconiformes	Falconidae	Falco	Falco columbarius	Merlin	1	43.38	-80.35	rare Charitable Research Reserve (Partial Grand Trunk Trail, Woodland Trail, Partial Cliff and Alvars)	Ross Dickson; Kevin Grundy; Jason Bracey
RARE-Sight-00026	Chordata	Aves	Passeriformes	Parulidae	Geothlypis	Geothlypis trichas	Common Yellowthroat	3	43.38	-80.35	rare Charitable Research Reserve (Partial Grand Trunk Trail, Woodland Trail, Partial Cliff and Alvars)	Ross Dickson; Kevin Grundy; Marco & Donna DeBruin
RARE-Sight-00027	Chordata	Aves	Passeriformes	Hirundinidae	Hirundo	Hirundo rustica	Barn Swallow	4	43.38	-80.35	rare Charitable Research Reserve (Partial Grand Trunk Trail, Woodland Trail, Partial Cliff and Alvars)	Ross Dickson; Kevin Grundy; Ruth Kroft; Jason Bracey; Marco & Donna DeBruin; Ruth Kroft; Bill Wilson & Jerry Guenther; Belen Bukowski, Pablo D. Lavinia, Dario A. Lijtmaer
RARE-Sight-00028	Chordata	Aves	Charadriiformes	Sternidae	Hydroprogne	Hydroprogne caspia	Caspian Tern	3	43.38	-80.35	rare Charitable Research Reserve (Partial Grand Trunk Trail, Woodland Trail, Partial Cliff and Alvars)	Ross Dickson; Glenn & Barb Mockford; Kevin Grundy; Marco & Donna DeBruin; Jason Bracey; Bill Wilson & Jerry Guenther; David Gascoigne & Miriam Bauman; Belen Bukowski, Pablo D. Lavinia, Dario A. Lijtmaer; Tony Zammit
RARE-Sight-00029	Chordata	Aves	Passeriformes	Icteridae	Icterus	Icterus galbula	Baltimore Oriole	2	43.38	-80.35	rare Charitable Research Reserve (Partial Grand Trunk Trail, Woodland Trail, Partial Cliff and Alvars)	Ross Dickson; Glenn & Barb Mockford; Kevin Grundy; Ruth Kroft; Marco & Donna DeBruin; Jason Bracey; Gerrie Grainge & Emily Damstra; Bill Wilson & Jerry Guenther; David Gascoigne & Miriam Bauman; Belen Bukowski, Pablo D. Lavinia, Dario A. Lijtmaer
RARE-Sight-00030	Chordata	Aves	Charadriiformes	Laridae	Larus	Larus delawarensis	Ring-billed Gull	7	43.38	-80.35	rare Charitable Research Reserve (Partial Grand Trunk Trail, Woodland Trail, Partial Cliff and Alvars)	Ross Dickson; Bill Wilson & Jerry Guenther; Glenn & Barb Mockford; Marco & Donna DeBruin; Jason Bracey; Kevin Grundy; Ruth Kroft
RARE-Sight-00031	Chordata	Aves	Charadriiformes	Laridae	Larus	Larus smithsonianus	Herring Gull	1	43.38	-80.35	rare Charitable Research Reserve (Partial Grand Trunk Trail, Woodland Trail, Partial Cliff and Alvars)	Bill Wilson & Jerry Guenther; Ross Dickson; Kevin Grundy; Belen Bukowski, Pablo D. Lavinia, Dario A. Lijtmaer
RARE-Sight-00032	Chordata	Mammalia	Chiroptera	Vespertilionidae	Lasionycteris	Lasionycteris noctivagans	Silver-Haired Bat		43.3773	-80.3408		Derek Morningstar	Acoustics only
RARE-Sight-00033	Chordata	Mammalia	Chiroptera	Vespertilionidae	Lasiurus	Lasiurus borealis	Eastern Red Bat		43.3773	-80.3408		Derek Morningstar
RARE-Sight-00034	Chordata	Mammalia	Chiroptera	Vespertilionidae	Lasiurus	Lasiurus cinereus	Hoary Bat		43.3773	-80.3408		Derek Morningstar	Acoustics only
RARE-Sight-00035	Chordata	Actinopterygii	Perciformes	Centrarchidae	Lepomis	Lepomis gibbosus	Pumpkinseed		43.3842	-80.3538	Site 1	Nate Jones, Adrian Boskovic
RARE-Sight-00036	Arthropoda	Insecta	Lepidoptera	Nymphalidae	Limenitis	Limenitis arthemis	White Admiral		43.3842	-80.3538	Site 1	V. Dinca
RARE-Sight-00037	Chordata	Actinopterygii	Cypriniformes	Cyprinidae	Luxilus	Luxilus chrysocephalus	Striped Shiner		43.3842	-80.3538	Site 1	Nate Jones, Adrian Boskovic
RARE-Sight-00038	Chordata	Actinopterygii	Cypriniformes	Cyprinidae	Luxilus	Luxilus cornutus	Common Shiner		43.3842	-80.3538	Site 1	Nate Jones, Adrian Boskovic
RARE-Sight-00039	Mycetozoa	Myxogastria	Liceales	Tubiferaceae	Lycogala	Lycogala epidendrum	Wolf's Milk, Slime Mold		43.3799	-80.3483	Site 4	Chris Hay	Sliver Maple, terrestrial
RARE-Sight-00040	Chordata	Aves	Piciformes	Picidae	Melanerpes	Melanerpes carolinus	Red-bellied Woodpecker	1	43.38	-80.35	rare Charitable Research Reserve (Partial Grand Trunk Trail, Woodland Trail, Partial Cliff and Alvars)	Ross Dickson; Jason Bracey; Marco & Donna DeBruin; Ruth Kroft
RARE-Sight-00041	Chordata	Aves	Passeriformes	Emberizidae	Melospiza	Melospiza melodia	Song Sparrow	5	43.38	-80.35	rare Charitable Research Reserve (Partial Grand Trunk Trail, Woodland Trail, Partial Cliff and Alvars)	Ross Dickson; Kevin Grundy; Ruth Kroft; Marco & Donna DeBruin; Ruth Kroft; Jason Bracey; Gerrie Grainge & Emily Damstra; Bill Wilson & Jerry Guenther; David Gascoigne & Miriam Bauman; Jason Bracey & Ross Dickson; Belen Bukowski, Pablo D. Lavinia, Dario A. Lijtmaer
RARE-Sight-00042	Chordata	Actinopterygii	Perciformes	Centrarchidae	Micropterus	Micropterus dolomieu	Smallmouth Bass		43.3842	-80.3538	Site 1	Nate Jones, Adrian Boskovic
RARE-Sight-00043	Chordata	Actinopterygii	Perciformes	Centrarchidae	Micropterus	Micropterus samoides	Largemouth Bass		43.3842	-80.3538	Site 1	Nate Jones, Adrian Boskovic
RARE-Sight-00044	Chordata	Aves	Passeriformes	Icteridae	Molothrus	Molothrus ater	Brown-headed Cowbird	1	43.38	-80.35	rare Charitable Research Reserve (Partial Grand Trunk Trail, Woodland Trail, Partial Cliff and Alvars)	Jason Bracey; Marco & Donna DeBruin; Ruth Kroft
RARE-Sight-00045	Chordata	Aves	Passeriformes	Tyrannidae	Myiarchus	Myiarchus crinitus	Great Crested Flycatcher	2	43.38	-80.35	rare Charitable Research Reserve (Partial Grand Trunk Trail, Woodland Trail, Partial Cliff and Alvars)	Ross Dickson; Kevin Grundy; Jason Bracey; Marco & Donna DeBruin; Ruth Kroft
RARE-Sight-00046	Chordata	Mammalia	Chiroptera	Vespertilionidae	Myotis	Myotis lucifugus	Little Brown Bat		43.3773	-80.3408		Derek Morningstar	Acoustics only
RARE-Sight-00047	Chordata	Actinopterygii	Cypriniformes	Cyprinidae	Nocomis	Nocomis micropogon	River chub		43.3842	-80.3538	Site 1	Nate Jones, Adrian Boskovic
RARE-Sight-00048	Chordata	Actinopterygii	Cypriniformes	Cyprinidae	Notropis	Notropis heterodon	Blackchin Shiner		43.3842	-80.3538	Site 1	Nate Jones, Adrian Boskovic
RARE-Sight-00049	Chordata	Aves	Falconiformes	Pandionidae	Pandion	Pandion haliaetus	Osprey	8	43.38	-80.35	rare Charitable Research Reserve (Partial Grand Trunk Trail, Woodland Trail, Partial Cliff and Alvars)	Ross Dickson; Kevin Grundy; Bill Wilson & Jerry Guenther; Glenn & Barb Mockford; Marco & Donna DeBruin; Gerrie Grainge & Emily Damstra; David Gascoigne & Miriam Bauman; Tony Zammit; Marco & Donna DeBruin; Ruth Kroft
RARE-Sight-00050	Arthropoda	Insecta	Lepidoptera	Papilionidae	Papilio	Papilio canadensis	Tiger Swallowtail		43.38	-80.35	rare Charitable Research Reserve (Partial Grand Trunk Trail, Woodland Trail, Partial Cliff and Alvars)	Marco, Donna DeBruin Ruth Kroft
RARE-Sight-00051	Arthropoda	Insecta	Lepidoptera	Papilionidae	Papilio	Papilio cresphontes	Giant Swallowtail		43.38	-80.35	rare Charitable Research Reserve (Partial Grand Trunk Trail, Woodland Trail, Partial Cliff and Alvars)	Marco, Donna DeBruin Ruth Kroft
RARE-Sight-00052	Chordata	Aves	Passeriformes	Cardinalidae	Passerina	Passerina cyanea	Indigo Bunting	1	43.38	-80.35	rare Charitable Research Reserve (Partial Grand Trunk Trail, Woodland Trail, Partial Cliff and Alvars)	Ross Dickson; Ruth Kroft; Marco & Donna DeBruin; Jason Bracey; Belen Bukowski, Pablo D. Lavinia, Dario A. Lijtmaer
RARE-Sight-00053	Chordata	Actinopterygii	Perciformes	Percidae	Perca	Perca flavescens	Yellow Perch		43.3842	-80.3538	Site 1	Nate Jones, Adrian Boskovic
RARE-Sight-00054	Chordata	Actinopterygii	Perciformes	Percidae	Percina	Percina maculate	Blackside Darter		43.3842	-80.3538	Site 1	Nate Jones, Adrian Boskovic
RARE-Sight-00055	Chordata	Aves	Pelecaniformes	Phalacrocoracidae	Phalacrocorax	Phalacrocorax auritus	Double-crested Cormorant	1	43.38	-80.35	rare Charitable Research Reserve (Partial Grand Trunk Trail, Woodland Trail, Partial Cliff and Alvars)	Ross Dickson; Kevin Grundy; Bill Wilson & Jerry Guenther; Glenn & Barb Mockford; Marco & Donna DeBruin
RARE-Sight-00056	Chordata	Aves	Passeriformes	Cardinalidae	Pheucticus	Pheucticus ludovicianus	Rose-breasted Grosbeak	2	43.38	-80.35	rare Charitable Research Reserve (Partial Grand Trunk Trail, Woodland Trail, Partial Cliff and Alvars)	Ross Dickson; Kevin Grundy; Marco & Donna DeBruin; Ruth Kroft; Jason Bracey; Gerrie Grainge & Emily Damstra
RARE-Sight-00057	Chordata	Aves	Piciformes	Picidae	Picoides	Picoides pubescens	Downy Woodpecker	6	43.38	-80.35	rare Charitable Research Reserve (Partial Grand Trunk Trail, Woodland Trail, Partial Cliff and Alvars)	Ross Dickson; Jason Bracey; Bill Wilson & Jerry Guenther; Belen Bukowski, Pablo D. Lavinia, Dario A. Lijtmaer; Kevin Grundy; Marco & Donna DeBruin; Ruth Kroft
RARE-Sight-00058	Chordata	Aves	Piciformes	Picidae	Picoides	Picoides villosus	Hairy Woodpecker	1	43.38	-80.35	rare Charitable Research Reserve (Partial Grand Trunk Trail, Woodland Trail, Partial Cliff and Alvars)	Marco & Donna DeBruin; Ruth Kroft; Jason Bracey; Tony Zammit
RARE-Sight-00059	Arthropoda	Insecta	Lepidoptera	Pieridae	Pieris	Pieris rapae	Cabbage White		43.3842	-80.3538	Site 1	V. Dinca
RARE-Sight-00060	Chordata	Amphibia	Caudata	Plethodontidae	Plethodon	Plethodon cinereus	Red-backed Salamander		43.3799	-80.3483	Site 4	F. Laberge
RARE-Sight-00061	Chordata	Aves	Passeriformes	Paridae	Poecile	Poecile atricapillus	Black-capped Chickadee	28	43.38	-80.35	rare Charitable Research Reserve (Partial Grand Trunk Trail, Woodland Trail, Partial Cliff and Alvars)	Ross Dickson; Glenn & Barb Mockford; Kevin Grundy; Ruth Kroft; Marco & Donna DeBruin; Jason Bracey; Gerrie Grainge & Emily Damstra; Bill Wilson & Jerry Guenther; David Gascoigne & Miriam Bauman; Belen Bukowski, Pablo D. Lavinia, Dario A. Lijtmaer; Tony Zammit
RARE-Sight-00062	Chordata	Aves	Passeriformes	Parulidae	Setophaga	Setophaga ruticilla	American Redstart	1	43.38	-80.35	rare Charitable Research Reserve (Partial Grand Trunk Trail, Woodland Trail, Partial Cliff and Alvars)	Ross Dickson; Kevin Grundy; Jason Bracey; Belen Bukowski, Pablo D. Lavinia, Dario A. Lijtmaer
RARE-Sight-00063	Chordata	Aves	Passeriformes	Sittidae	Sitta	Sitta carolinensis	White-breasted Nuthatch	3	43.38	-80.35	RARE Charitable Research Reserve (Partial Grand Trunk Trail, Woodland Trail, Partial Cliff and Alvars); Linear Trail	Jason Bracey & Ross Dickson; Marco & Donna DeBruin; Ruth Kroft; Belen Bukowski, Pablo D. Lavinia, Dario A. Lijtmaer
RARE-Sight-00064	Chordata	Aves	Passeriformes	Hirundinidae	Stelgidopteryx	Stelgidopteryx serripennis	Northern Rough-winged Swallow	1	43.38	-80.35	rare Charitable Research Reserve (Partial Grand Trunk Trail, Woodland Trail, Partial Cliff and Alvars)	Marco, Donna DeBruin Ruth Kroft
RARE-Sight-00065	Mycetozoa	Myxogastria	Stemonitida	Stemonitidae	Stemonitis	Stemonitis axifera	Slime Mold		43.3799	-80.3483	Site 4	Chris Hay	Sliver Maple, terrestrial
RARE-Sight-00066	Arthropoda	Insecta	Hymenoptera	Formicidae	Stigmatomma	Stigmatomma pallipes	Vampire Ant		43.3842	-80.3538	Site 1	Priscila Hanisch
RARE-Sight-00067	Chordata	Aves	Passeriformes	Turdidae	Turdus	Turdus migratorius	American Robin	14	43.38	-80.35	rare Charitable Research Reserve (Partial Grand Trunk Trail, Woodland Trail, Partial Cliff and Alvars)	Ross Dickson; Glenn & Barb Mockford; Kevin Grundy; Ruth Kroft; Marco & Donna DeBruin; Jason Bracey; Gerrie Grainge & Emily Damstra; Bill Wilson & Jerry Guenther; David Gascoigne & Miriam Bauman; Belen Bukowski, Pablo D. Lavinia, Dario A. Lijtmaer
RARE-Sight-00068	Chordata	Aves	Passeriformes	Tyrannidae	Tyrannus	Tyrannus tyrannus	Eastern Kingbird	2	43.38	-80.35	rare Charitable Research Reserve (Partial Grand Trunk Trail, Woodland Trail, Partial Cliff and Alvars)	Ross Dickson; Kevin Grundy; Marco & Donna DeBruin; Jason Bracey; Bill Wilson & Jerry Guenther; Belen Bukowski, Pablo D. Lavinia, Dario A. Lijtmaer
RARE-Sight-00069	Arthropoda	Insecta	Lepidoptera	Nymphalidae	Vanessa	Vanessa atalanta	Red Admiral		43.3842	-80.3538	Site 1	V. Dinca
RARE-Sight-00070	Chordata	Aves	Passeriformes	Vireonidae	Vireo	Vireo gilvus	Warbling Vireo	2	43.38	-80.35	rare Charitable Research Reserve (Partial Grand Trunk Trail, Woodland Trail, Partial Cliff and Alvars)	Ross Dickson; Kevin Grundy; Marco & Donna DeBruin; Gerrie Grainge & Emily Damstra
RARE-Sight-00071	Chordata	Aves	Passeriformes	Vireonidae	Vireo	Vireo olivaceus	Red-eyed Vireo	2	43.38	-80.35	rare Charitable Research Reserve (Partial Grand Trunk Trail, Woodland Trail, Partial Cliff and Alvars)	Ross Dickson; Kevin Grundy; Glenn & Barb Mockford; Ruth Kroft; Jason Bracey
RARE-Sight-00072	Chordata	Mammalia	Carnivora	Canidae	Vulpes	Vulpes vulpes	Red Fox		43.3842	-80.3538	Site 1	V. Dinca
RARE-Sight-00073	Chordata	Amphibia	Anura	Hylidae			Tree Frog		43.38	-80.35	rare Charitable Research Reserve (Partial Grand Trunk Trail, Woodland Trail, Partial Cliff and Alvars)	Marco, Donna DeBruin Ruth Kroft
RARE-Sight-00074	Platyhelminthes						Flatworms		43.3842	-80.3538	Site 1
RARE-Sight-00075	Mollusca	Gastropoda		Discidae	Anguispira	Anguispira alternata	Snail		43.3854	-80.3502	Site 2	A. Nicolai; R. Forsyth
RARE-Sight-00076	Mollusca	Gastropoda		Vertiginidae	Vertigo	Vertigo bollesiana	Snail		43.3854	-80.3502	Site 2	A. Nicolai; R. Forsyth
RARE-Sight-00077	Mollusca	Gastropoda		Pristilomatidae	Hawaiia	Hawaiia minuscula	Snail		43.3854	-80.3502	Site 2	A. Nicolai; R. Forsyth
RARE-Sight-00078	Mollusca	Gastropoda		Succineidae	Novisuccinea	Novisuccinea ovalis	Snail		43.3854	-80.3502	Site 2	A. Nicolai; R. Forsyth
RARE-Sight-00079	Chordata	Aves	Anseriformes	Anatidae	Anas	Anas rubripes	American Black Duck		43.3842	-80.3538	rare Charitable Research Reserve	Ross Dickson; Bill Wilson & Jerry Guenther
RARE-Sight-00080	Chordata	Aves	Accipitriformes	Accipitridae	Haliaetus	Haliaeetus leucocephalus	Bald Eagle		43.3842	-80.3538	rare Charitable Research Reserve	Bill Wilson & Jerry Guenther
RARE-Sight-00081	Chordata	Aves	Passeriformes	Hirundinidae	Riparia	Riparia riparia	Bank Swallow		43.3842	-80.3538	rare Charitable Research Reserve	Bill Wilson & Jerry Guenther; Ross Dickson
RARE-Sight-00082	Chordata	Aves	Coraciiformes	Alcedinidae	Megaceryle	Megaceryle alcyon	Belted Kingfisher		43.3842	-80.3538	rare Charitable Research Reserve	Bill Wilson & Jerry Guenther; Marco & Donna DeBruin
RARE-Sight-00083	Chordata	Aves	Passeriformes	Polioptilidae	Polioptila	Polioptila caerulea	Blue-grey Gnatcatcher		43.3842	-80.3538	rare Charitable Research Reserve	Gerrie Grainge & Emily Damstra
RARE-Sight-00084	Chordata	Aves	Anseriformes	Anatidae	Anas	Anas discors	Blue-winged Teal		43.3842	-80.3538	rare Charitable Research Reserve	Bill Wilson & Jerry Guenther
RARE-Sight-00085	Chordata	Aves	Passeriformes	Icteridae	Dolichonyx	Dolichonyx oryzivorus	Bobolink		43.3842	-80.3538	rare Charitable Research Reserve	Ruth Kroft
RARE-Sight-00086	Chordata	Aves	Passeriformes	Mimidae	Toxostoma	Toxostoma rufum	Brown Thrasher		43.3842	-80.3538	rare Charitable Research Reserve	Jason Bracey
RARE-Sight-00087	Chordata	Aves	Passeriformes	Parulidae	Cardellina	Cardellina canadensis	Canada Warbler		43.3842	-80.3538	rare Charitable Research Reserve	Jason Bracey
RARE-Sight-00088	Chordata	Aves	Passeriformes	Emberizidae	Spizella	Spizella passerina	Chipping Sparrow		43.3842	-80.3538	rare Charitable Research Reserve	Jason Bracey
RARE-Sight-00089	Chordata	Aves	Passeriformes	Emberizidae	Spizella	Spizella pallida	Clay-coloured Sparrow		43.3842	-80.3538	rare Charitable Research Reserve	Jason Bracey
RARE-Sight-00090	Chordata	Aves	Passeriformes	Icteridae	Quiscalus	Quiscalus quiscula	Common Grackle		43.3842	-80.3538	rare Charitable Research Reserve	Ross Dickson; Kevi Grundy; Ruth Kroft; Marco & Donna DeBruin; Jason Bracey; David Gascoigne & Miriam Bauman; Belen Bukowski, Pablo D. Lavinia, Dario A. Lijtmaer
RARE-Sight-00091	Chordata	Aves	Passeriformes	Corvidae	Corvus	Corvus corax	Common Raven		43.3842	-80.3538	rare Charitable Research Reserve	Glenn & Barb Mockford
RARE-Sight-00092	Chordata	Aves	Falconiformes	Accipitridae	Accipiter	Accipiter cooperii	Cooper's Hawk		43.3842	-80.3538	rare Charitable Research Reserve	Ross Dickson; Kevin Grundy; Jason Bracey
RARE-Sight-00093	Chordata	Aves	Passeriformes	Turdidae	Sialia	Sialia sialis	Eastern Bluebird		43.3842	-80.3538	rare Charitable Research Reserve	Jason Bracey
RARE-Sight-00094	Chordata	Aves	Passeriformes	Tyrannidae	Sayornis	Sayornis phoebe	Eastern Phoebe		43.3842	-80.3538	rare Charitable Research Reserve	Gerrie Grainge & Emily Damstra
RARE-Sight-00095	Chordata	Aves	Strigiformes	Strigidae	Megascops	Megascops asio	Eastern Screech Owl		43.3842	-80.3538	rare Charitable Research Reserve	Jason Bracey & Stephanie Sobek-Swant
RARE-Sight-00096	Chordata	Aves	Passeriformes	Sturnidae	Sturnus	Sturnus vulgaris	European Starling		43.3842	-80.3538	rare Charitable Research Reserve	Ross Dickson & Kevin Grundy; Jason Bracey; Belen Bukowski, Pablo D. Lavinia, Dario A. Lijtmaer
RARE-Sight-00097	Chordata	Aves	Passeriformes	Emberizidae	Spizella	Spizella pusilla	Field Sparrow		43.3842	-80.3538	rare Charitable Research Reserve	Ross Dickson; Jason Bracey; Bill Wilson & Jerry Guenther
RARE-Sight-00098	Chordata	Aves	Passeriformes	Emberizidae	Ammodramus	Ammodramus savannarum	Grasshopper Sparrow		43.3842	-80.3538	rare Charitable Research Reserve	Jason Bracey; Bill Wilson & Jerry Guenther
RARE-Sight-00099	Chordata	Aves	Ciconiiformes	Ardeidae	Ardea	Ardea herodias	Great Blue Heron		43.3842	-80.3538	rare Charitable Research Reserve	Ross Dickson; Bill Wilson & Jerry Guenther; Glenn & Barb Mockford; Marco & Donna DeBruin; Jason Bracey; David Gascoigne & Miriam Bauman
RARE-Sight-00100	Chordata	Aves	Ciconiiformes	Ardeidae	Ardea	Ardea alba	Great Egret		43.3842	-80.3538	rare Charitable Research Reserve	Bill Wilson & Jerry Guenther
RARE-Sight-00101	Chordata	Aves	Strigiformes	Strigidae	Bubo	Bubo virginianus	Great Horned Owl		43.3842	-80.3538	rare Charitable Research Reserve	Jason Bracey
RARE-Sight-00102	Chordata	Aves	Charadriiformes	Scolopacidae	Tringa	Tringa melanoleuca	Greater Yellowlegs		43.3842	-80.3538	rare Charitable Research Reserve	Bill Wilson & Jerry Guenther
RARE-Sight-00103	Chordata	Aves	Anseriformes	Anatidae	Anas	Anas crecca	Green-winged Teal		43.3842	-80.3538	rare Charitable Research Reserve	Bill Wilson & Jerry Guenther
RARE-Sight-00104	Chordata	Aves	Passeriformes	Fringillidae	Carpodacus	Carpodacus mexicanus	House Finch		43.3842	-80.3538	rare Charitable Research Reserve	Gerrie Grainge & Emily Damstra
RARE-Sight-00105	Chordata	Aves	Passeriformes	Troglodytidae	Troglodytes	Troglodytes aedon	House Wren		43.3842	-80.3538	rare Charitable Research Reserve	Ross Dickson; Jason Bracey; Gerrie Grainge & Emily Damstra; Bill Wilson & Jerry Guenther; Belen Bukowski, Pablo D. Lavinia, Dario A. Lijtmaer
RARE-Sight-00106	Chordata	Aves	Charadriiformes	Charadriidae	Charadrius	Charadrius vociferus	Killdeer		43.3842	-80.3538	rare Charitable Research Reserve	Bill Wilson & Jerry Guenther; Marco & Donna DeBruin
RARE-Sight-00107	Chordata	Aves	Charadriiformes	Scolopacidae	Calidris	Calidris minutilla	Least Sandpiper		43.3842	-80.3538	rare Charitable Research Reserve	Bill Wilson & Jerry Guenther
RARE-Sight-00108	Chordata	Aves	Charadriiformes	Scolopacidae	Tringa	Tringa flavipes	Lesser Yellowlegs		43.3842	-80.3538	rare Charitable Research Reserve	Bill Wilson & Jerry Guenther
RARE-Sight-00109	Chordata	Aves	Columbiformes	Columbidae	Zenaida	Zenaida macroura	Mourning Dove		43.3842	-80.3538	rare Charitable Research Reserve	Ross Dickson; Kevin Grundy; Ruth Kroft; Marco & Donna DeBruin; Jason Bracey; Bill Wilson & Jerry Guenther; Gerrie Grainge & Emily Damstra; Belen Bukowski, Pablo D. Lavinia, Dario A. Lijtmaer; Tony Zammit
RARE-Sight-00110	Chordata	Aves	Passeriformes	Parulidae	Leiothlypis	Leiothlypis ruficapilla	Nashville Warbler		43.3842	-80.3538	rare Charitable Research Reserve	Ross Dickson & Kevin Grundy
RARE-Sight-00111	Chordata	Aves	Passeriformes	Tyrannidae	Contopus	Contopus borealis	Olive-sided Flycatcher		43.3842	-80.3538	rare Charitable Research Reserve	Bill Wilson & Jerry Guenther
RARE-Sight-00112	Chordata	Aves	Passeriformes	Icteridae	Icterus	Icterus spurius	Orchard Oriole		43.3842	-80.3538	rare Charitable Research Reserve	Marco & Donna DeBruin
RARE-Sight-00113	Chordata	Aves	Piciformes	Picidae	Dryocopus	Dryocopus pileatus	Pileated Woodpecker		43.3842	-80.3538	rare Charitable Research Reserve	Jason Bracey
RARE-Sight-00114	Chordata	Aves	Falconiformes	Accipitridae	Buteo	Buteo jamaicensis	Red-tailed Hawk		43.3842	-80.3538	rare Charitable Research Reserve	Ross Dickson; Marco & Donna DeBruin; Jason Bracey; Bill Wilson & Jerry Guenther; Belen Bukowski, Pablo D. Lavinia, Dario A. Lijtmaer
RARE-Sight-00115	Chordata	Aves	Passeriformes	Icteridae	Agelaius	Agelaius phoeniceus	Red-winged Blackbird		43.3842	-80.3538	rare Charitable Research Reserve	Ross Dickson; Jason Bracey; Bill Wilson & Jerry Guenther
RARE-Sight-00116	Chordata	Aves	Columbiformes	Columbidae	Columba	Columba livia	Rock Pigeon		43.3842	-80.3538	rare Charitable Research Reserve	Bill Wilson & Jerry Guenther
RARE-Sight-00117	Chordata	Aves	Apodiformes	Trochilidae	Archilochus	Archilochus colubris	Ruby-throated Hummingbird		43.3842	-80.3538	rare Charitable Research Reserve	Ross Dickson; Marco & Donna DeBruin; Jason Bracey; Gerrie Grainge & Emily Damstra
RARE-Sight-00118	Chordata	Aves	Passeriformes	Emberizidae	Passerculus	Passerculus sandwichensis	Savannah Sparrow		43.3842	-80.3538	rare Charitable Research Reserve	Jason Bracey; Bill Wilson & Jerry Guenther
RARE-Sight-00119	Chordata	Aves	Falconiformes	Accipitridae	Accipiter	Accipiter striatus	Sharp-shinned Hawk		43.3842	-80.3538	rare Charitable Research Reserve	Jason Bracey
RARE-Sight-00120	Chordata	Aves	Charadriiformes	Scolopacidae	Actitis	Actitis macularius	Spotted Sandpiper		43.3842	-80.3538	rare Charitable Research Reserve	Ross Dickson; Bill Wilson & Jerry Guenther; Kevin Grundy
RARE-Sight-00121	Chordata	Aves	Passeriformes	Hirundinidae	Tachycineta	Tachycineta bicolor	Tree Swallow		43.3842	-80.3538	rare Charitable Research Reserve	Glenn & Barb Mockford; Jason Bracey & Ross Dickson; Bill Wilson & Jerry Guenther; Belen Bukowski, Pablo D. Lavinia, Dario A. Lijtmaer
RARE-Sight-00122	Chordata	Aves	Passeriformes	Emberizidae	Pooecetes	Pooecetes gramineus	Vesper Sparrow		43.3842	-80.3538	rare Charitable Research Reserve	Bill Wilson & Jerry Guenther
RARE-Sight-00123	Chordata	Aves	Galliformes	Meleagrididae	Meleagris	Meleagris gallopavo	Wild Turkey		43.3842	-80.3538	rare Charitable Research Reserve	Jason Bracey
RARE-Sight-00124	Chordata	Aves	Passeriformes	Tyrannidae	Empidonax	Empidonax traillii	Willow Flycatcher		43.3842	-80.3538	rare Charitable Research Reserve	Marco & Donna DeBruin; Ross Dickson; Kevin Grundy
RARE-Sight-00125	Chordata	Aves	Anseriformes	Anatidae	Aix	Aix sponsa	Wood Duck		43.3842	-80.3538	rare Charitable Research Reserve	Ross Dickson
RARE-Sight-00126	Chordata	Aves	Passeriformes	Parulidae	Setophaga	Setophaga petechia	Yellow Warbler		43.3842	-80.3538	rare Charitable Research Reserve	Ross Dickson; Marco & Donna DeBruin; Jason Bracey; Gerrie Grainge & Emily Damstra
RARE-Sight-00127	Chordata	Aves	Passeriformes	Parulidae	Setophaga	Setophaga coronata	Yellow-rumped Warbler		43.3842	-80.3538	rare Charitable Research Reserve	Jason Bracey
