# Supplementary material for: Biodiversity inventories in high gear: DNA barcoding facilitates a rapid biotic survey of a temperate nature reserve
Source: Biodivers Data J. 2015 Aug 30;(3):e6313. doi: 10.3897/BDJ.3.e6313 (PMC4568406; doi:10.3897/BDJ.3.e6313)
Supplement: Supplementary material 10 — Final combined inventory for rare Charitable Research Reserve [file biodiversity_data_journal-3-e6313-s010.xlsx]

## Sheet: Sheet1
Taxon_Local_ID	Kingdom	Phylum	Class	Order	Family	Genus	Species	Subspecies	Variety	AUTHORSHIP	Form	BIN	Confirmed ID	Pre-2015 Inventory	2015 Inventory	Vouchers in BIO	Notes
1	Amoebozoa	Mycetozoa	Myxogastria	Liceales	Tubiferaceae	Lycogala	epidendrum			Linnaeus, 1829			Y	Y	Y		/ flavofuscum
2	Amoebozoa	Mycetozoa	Myxogastria	Liceida	Reticulariaceae	Tubifera	ferruginosa			(Batsch) J.F. Gmel.			Y	Y
3	Amoebozoa	Mycetozoa	Myxogastria	Stemonitida	Stemonitidae	Stemonitis	axifera			Bull, 1791			Y	Y	Y	Y
4	Animalia	Annelida	Clitellata	Arhynchobdellida	Erpobdellidae	Erpobdella	punctata			Leidy, 1870			Y		Y	Y
5	Animalia	Annelida	Clitellata	Haplotaxida	Lumbricidae	Lumbricus	terrestris			Linnaeus, 1758			Y		Y	Y
6	Animalia	Arthropoda	Arachnida	Araneae	Agelenidae	Agelenopsis	potteri			Blackwall, 1846			Y		Y	Y
7	Animalia	Arthropoda	Arachnida	Araneae	Amaurobiidae	Callobius	bennetti			Blackwall, 1846		BOLD:AAB8212	Y		Y	Y	BOLD:AAB8212
8	Animalia	Arthropoda	Arachnida	Araneae	Anyphaenidae	Anyphaena	celer			Hentz, 1847			Y		Y	Y
9	Animalia	Arthropoda	Arachnida	Araneae	Anyphaenidae	Anyphaena	pectorosa			L. Koch, 1866		BOLD:AAD6926	Y		Y	Y	BOLD:AAD6926
10	Animalia	Arthropoda	Arachnida	Araneae	Anyphaenidae	Hibana	gracilis			Hentz, 1847		BOLD:AAN6394	Y		Y	Y	BOLD:AAN6394
11	Animalia	Arthropoda	Arachnida	Araneae	Anyphaenidae	Wulfila	saltabundus			Hentz, 1847		BOLD:AAC6924	Y		Y	Y	BOLD:AAC6924
12	Animalia	Arthropoda	Arachnida	Araneae	Araneidae	Acanthepeira	stellata			Walckenaer, 1805		BOLD:AAD7855	Y		Y	Y	BOLD:AAD7855
13	Animalia	Arthropoda	Arachnida	Araneae	Araneidae	Araneus	diadematus			Clerck, 1757		BOLD:AAA4125	Y		Y	Y	BOLD:AAA4125
14	Animalia	Arthropoda	Arachnida	Araneae	Araneidae	Araneus	trifolium			Hentz, 1847		BOLD:AAB8544	Y		Y	Y	BOLD:AAB8544
15	Animalia	Arthropoda	Arachnida	Araneae	Araneidae	Araniella	displicata			Hentz, 1847		BOLD:AAA8399	Y		Y	Y	BOLD:AAA8399
16	Animalia	Arthropoda	Arachnida	Araneae	Araneidae	Argiope	aurantia			Lucas, 1833		BOLD:AAB7933	Y		Y	Y	BOLD:AAB7933
17	Animalia	Arthropoda	Arachnida	Araneae	Araneidae	Argiope	trifasciata			Forsskål, 1775			Y		Y	Y
18	Animalia	Arthropoda	Arachnida	Araneae	Araneidae	Eustala	anastera			Walckenaer, 1841		BOLD:AAL4913	Y		Y	Y	BOLD:AAL4913
19	Animalia	Arthropoda	Arachnida	Araneae	Araneidae	Eustala	cepina			Walckenaer, 1841		BOLD:AAB7935	Y		Y	Y	BOLD:AAB7935
20	Animalia	Arthropoda	Arachnida	Araneae	Araneidae	Eustala	emertoni			Banks, 1904			Y		Y	Y
21	Animalia	Arthropoda	Arachnida	Araneae	Araneidae	Hypsosinga	pygmaea			Sundevall, 1831		BOLD:ABX6180	Y		Y	Y	BOLD:ABX6180
22	Animalia	Arthropoda	Arachnida	Araneae	Araneidae	Hypsosinga	rubens			Hentz, 1847		BOLD:AAN6264	Y		Y	Y	BOLD:AAN6264
23	Animalia	Arthropoda	Arachnida	Araneae	Araneidae	Larinioides	cornutus			Clerck, 1757		BOLD:AAA8999	Y		Y	Y	BOLD:AAA8999
24	Animalia	Arthropoda	Arachnida	Araneae	Araneidae	Larinioides	patagiatus			Clerck, 1757			Y		Y	Y
25	Animalia	Arthropoda	Arachnida	Araneae	Araneidae	Mangora	gibberosa			Hentz, 1847		BOLD:AAB7330	Y		Y	Y	BOLD:AAB7330
26	Animalia	Arthropoda	Arachnida	Araneae	Araneidae	Mangora	maculata			Keyserling, 1865			Y		Y	Y
27	Animalia	Arthropoda	Arachnida	Araneae	Araneidae	Mangora	placida			Hentz, 1847		BOLD:AAI4456|BOLD:ACE4103	Y		Y	Y	BOLD:AAI4456|BOLD:ACE4103
28	Animalia	Arthropoda	Arachnida	Araneae	Araneidae	Neoscona	arabesca			Walckenaer, 1841		BOLD:AAA4123	Y		Y	Y	BOLD:AAA4123
29	Animalia	Arthropoda	Arachnida	Araneae	Clubionidae	Clubiona	abboti			L. Koch, 1866		BOLD:AAD1564	Y		Y	Y	BOLD:AAD1564
30	Animalia	Arthropoda	Arachnida	Araneae	Clubionidae	Clubiona	bryantae			Gertsch, 1941			Y		Y	Y
31	Animalia	Arthropoda	Arachnida	Araneae	Clubionidae	Clubiona	johnsoni			Gertsch, 1941		BOLD:AAN4847	Y		Y	Y	BOLD:AAN4847
32	Animalia	Arthropoda	Arachnida	Araneae	Clubionidae	Clubiona	maritima			L. Koch, 1867		BOLD:AAI4085	Y		Y	Y	BOLD:AAI4085
33	Animalia	Arthropoda	Arachnida	Araneae	Clubionidae	Clubiona	obesa			Hentz, 1847		BOLD:AAD5417	Y		Y	Y	BOLD:AAD5417
34	Animalia	Arthropoda	Arachnida	Araneae	Clubionidae	Clubiona	pallidula			Clerck, 1757		BOLD:AAI4087	Y		Y	Y	BOLD:AAI4087
35	Animalia	Arthropoda	Arachnida	Araneae	Dictynidae	Cicurina	brevis			Emerton, 1890		BOLD:AAC8284	Y		Y	Y	BOLD:AAC8284
36	Animalia	Arthropoda	Arachnida	Araneae	Dictynidae	Cicurina	itasca			Chamberlin & Ivie, 1940		BOLD:AAI4031	Y		Y	Y	BOLD:AAI4031
37	Animalia	Arthropoda	Arachnida	Araneae	Dictynidae	Cicurina	pallida			Keyserling, 1887		BOLD:AAF3046	Y		Y	Y	BOLD:AAF3046
38	Animalia	Arthropoda	Arachnida	Araneae	Dictynidae	Dictyna	bellans			Chamberlin, 1919		BOLD:AAI6249	Y		Y	Y	BOLD:AAI6249
39	Animalia	Arthropoda	Arachnida	Araneae	Dictynidae	Dictyna	bostoniensis			Emerton, 1888		BOLD:AAL1061	Y		Y	Y	BOLD:AAL1061
40	Animalia	Arthropoda	Arachnida	Araneae	Dictynidae	Dictyna	brevitarsa			Emerton, 1915		BOLD:AAB2306	Y		Y	Y	BOLD:AAB2306
41	Animalia	Arthropoda	Arachnida	Araneae	Dictynidae	Dictyna	foliacea			Hentz, 1850		BOLD:AAI6247	Y		Y	Y	BOLD:AAI6247
42	Animalia	Arthropoda	Arachnida	Araneae	Dictynidae	Dictyna	volucripes			Keyserling, 1881		BOLD:AAB1638|BOLD:ACE2869	Y		Y	Y	BOLD:AAB1638|BOLD:ACE2869
43	Animalia	Arthropoda	Arachnida	Araneae	Dictynidae	Emblyna	annulipes			Blackwall, 1846			Y		Y	Y
44	Animalia	Arthropoda	Arachnida	Araneae	Dictynidae	Emblyna	hentzi			Kaston, 1945		BOLD:AAI6251	Y		Y	Y	BOLD:AAI6251
45	Animalia	Arthropoda	Arachnida	Araneae	Dictynidae	Emblyna	manitoba			Ivie, 1947		BOLD:AAI9209	Y		Y	Y	BOLD:AAI9209
46	Animalia	Arthropoda	Arachnida	Araneae	Dictynidae	Emblyna	sublata			Hentz, 1850		BOLD:AAA7272	Y		Y	Y	BOLD:AAA7272
47	Animalia	Arthropoda	Arachnida	Araneae	Gnaphosidae	Drassyllus	depressus			Emerton, 1890		BOLD:AAD8676	Y		Y	Y	BOLD:AAD8676
48	Animalia	Arthropoda	Arachnida	Araneae	Gnaphosidae	Drassyllus	niger			Banks, 1896		BOLD:AAI9037	Y		Y	Y	BOLD:AAI9037
49	Animalia	Arthropoda	Arachnida	Araneae	Gnaphosidae	Gnaphosa	parvula			Banks, 1896		BOLD:AAC3779	Y		Y	Y	BOLD:AAC3779
50	Animalia	Arthropoda	Arachnida	Araneae	Gnaphosidae	Haplodrassus	signifer			C. L. Koch, 1839		BOLD:AAD0462	Y		Y	Y	BOLD:AAD0462
51	Animalia	Arthropoda	Arachnida	Araneae	Gnaphosidae	Herpyllus	ecclesiasticus			Hentz, 1832		BOLD:AAF2106	Y		Y	Y	BOLD:AAF2106
52	Animalia	Arthropoda	Arachnida	Araneae	Gnaphosidae	Micaria	pulicaria			Sundevall, 1831		BOLD:AAC6612	Y		Y	Y	BOLD:AAC6612
53	Animalia	Arthropoda	Arachnida	Araneae	Gnaphosidae	Sergiolus	ocellatus			Walckenaer, 1837		BOLD:ACV6055	Y		Y	Y	BOLD:ACV6055
54	Animalia	Arthropoda	Arachnida	Araneae	Gnaphosidae	Zelotes	hentzi			Barrows, 1945		BOLD:AAA8914	Y		Y	Y	BOLD:AAA8914
55	Animalia	Arthropoda	Arachnida	Araneae	Gnaphosidae	Zelotes	pseustes			Chamberlin, 1922			Y		Y	Y
56	Animalia	Arthropoda	Arachnida	Araneae	Hahniidae	Neoantistea	agilis			Keyserling, 1887		BOLD:ACV5090	Y		Y	Y	BOLD:ACV5090
57	Animalia	Arthropoda	Arachnida	Araneae	Hahniidae	Neoantistea	gosiuta			Gertsch, 1934		BOLD:AAG9583	Y		Y	Y	BOLD:AAG9583
58	Animalia	Arthropoda	Arachnida	Araneae	Linyphiidae	Agyneta	fabra			Keyserling, 1886		BOLD:AAE3860	Y		Y	Y	BOLD:AAE3860
59	Animalia	Arthropoda	Arachnida	Araneae	Linyphiidae	Agyneta	micaria			Emerton, 1882		BOLD:AAN6265	Y		Y	Y	BOLD:AAN6265
60	Animalia	Arthropoda	Arachnida	Araneae	Linyphiidae	Agyneta	unimaculata			Banks, 1892		BOLD:AAH0003	Y		Y	Y	BOLD:AAH0003
61	Animalia	Arthropoda	Arachnida	Araneae	Linyphiidae	Bathyphantes	brevis			Emerton, 1911		BOLD:AAC5851	Y		Y	Y	BOLD:AAC5851
62	Animalia	Arthropoda	Arachnida	Araneae	Linyphiidae	Bathyphantes	pallidus			Banks, 1892		BOLD:AAC9112	Y		Y	Y	BOLD:AAC9112
63	Animalia	Arthropoda	Arachnida	Araneae	Linyphiidae	Centromerus	sylvaticus			Blackwall, 1841		BOLD:AAA4132	Y		Y	Y	BOLD:AAA4132
64	Animalia	Arthropoda	Arachnida	Araneae	Linyphiidae	Ceraticelus	atriceps			O. P.-Cambridge, 1874		BOLD:AAI3701	Y		Y	Y	BOLD:AAI3701
65	Animalia	Arthropoda	Arachnida	Araneae	Linyphiidae	Ceraticelus	similis			Banks, 1892		BOLD:AAF1318	Y		Y	Y	BOLD:AAF1318
66	Animalia	Arthropoda	Arachnida	Araneae	Linyphiidae	Ceratinella	brunnea			Emerton, 1882		BOLD:AAD2101	Y		Y	Y	BOLD:AAD2101
67	Animalia	Arthropoda	Arachnida	Araneae	Linyphiidae	Ceratinops	crenatus			Emerton, 1882		BOLD:ACF8798	Y		Y	Y	BOLD:ACF8798
68	Animalia	Arthropoda	Arachnida	Araneae	Linyphiidae	Ceratinops	latus			Emerton, 1882		BOLD:AAI5447	Y		Y	Y	BOLD:AAI5447
69	Animalia	Arthropoda	Arachnida	Araneae	Linyphiidae	Ceratinopsis	auriculata			Emerton, 1909		BOLD:ACR6338	Y		Y	Y	BOLD:ACR6338
70	Animalia	Arthropoda	Arachnida	Araneae	Linyphiidae	Ceratinopsis	labradorensis			Emerton, 1925		BOLD:ACV5182	Y		Y	Y	BOLD:ACV5182
71	Animalia	Arthropoda	Arachnida	Araneae	Linyphiidae	Collinsia	plumosa			Emerton, 1882		BOLD:AAM9146	Y		Y	Y	BOLD:AAM9146
72	Animalia	Arthropoda	Arachnida	Araneae	Linyphiidae	Eridantes	erigonoides			Emerton, 1882		BOLD:AAH0004	Y		Y	Y	BOLD:AAH0004
73	Animalia	Arthropoda	Arachnida	Araneae	Linyphiidae	Erigone	atra			Blackwall, 1833		BOLD:ACE5877	Y		Y	Y	BOLD:ACE5877
74	Animalia	Arthropoda	Arachnida	Araneae	Linyphiidae	Erigone	autumnalis			Emerton, 1882		BOLD:AAH0001	Y		Y	Y	BOLD:AAH0001
75	Animalia	Arthropoda	Arachnida	Araneae	Linyphiidae	Erigone	blaesa			Crosby & Bishop, 1928		BOLD:ACE9601	Y		Y	Y	BOLD:ACE9601
76	Animalia	Arthropoda	Arachnida	Araneae	Linyphiidae	Frontinella	communis			Hentz, 1850		BOLD:AAE0825	Y		Y	Y	BOLD:AAE0825
77	Animalia	Arthropoda	Arachnida	Araneae	Linyphiidae	Grammonota	angusta			Dondale, 1959		BOLD:AAD1498	Y		Y	Y	BOLD:AAD1498
78	Animalia	Arthropoda	Arachnida	Araneae	Linyphiidae	Grammonota	inornata			Emerton, 1882		BOLD:ACV5737	Y		Y	Y	BOLD:ACV5737
79	Animalia	Arthropoda	Arachnida	Araneae	Linyphiidae	Hypomma	marxi			Keyserling, 1886		BOLD:AAB9520	Y		Y	Y	BOLD:AAB9520
80	Animalia	Arthropoda	Arachnida	Araneae	Linyphiidae	Hypselistes	florens			O. P.-Cambridge, 1875		BOLD:AAB4233	Y		Y	Y	BOLD:AAB4233
81	Animalia	Arthropoda	Arachnida	Araneae	Linyphiidae	Mermessus	index			Emerton, 1914		BOLD:ACL4554	Y		Y	Y	BOLD:ACL4554
82	Animalia	Arthropoda	Arachnida	Araneae	Linyphiidae	Mermessus	trilobatus			Emerton, 1882		BOLD:AAC8898	Y		Y	Y	BOLD:AAC8898
83	Animalia	Arthropoda	Arachnida	Araneae	Linyphiidae	Microlinyphia	mandibulata			Emerton, 1882		BOLD:AAF4994	Y		Y	Y	BOLD:AAF4994
84	Animalia	Arthropoda	Arachnida	Araneae	Linyphiidae	Neriene	clathrata			Sundevall, 1830		BOLD:AAA8358|BOLD:AAB7327	Y		Y	Y	BOLD:AAA8358|BOLD:AAB7327
85	Animalia	Arthropoda	Arachnida	Araneae	Linyphiidae	Neriene	montana			Clerck, 1757			Y		Y	Y
86	Animalia	Arthropoda	Arachnida	Araneae	Linyphiidae	Neriene	variabilis			Banks, 1892			Y		Y	Y
87	Animalia	Arthropoda	Arachnida	Araneae	Linyphiidae	Pityohyphantes	costatus			Hentz, 1850			Y		Y	Y
88	Animalia	Arthropoda	Arachnida	Araneae	Linyphiidae	Pityohyphantes	subarcticus			Chamberlin & Ivie, 1943			Y		Y	Y
89	Animalia	Arthropoda	Arachnida	Araneae	Linyphiidae	Pocadicnemis	americana			Millidge, 1976		BOLD:AAC9060	Y		Y	Y	BOLD:AAC9060
90	Animalia	Arthropoda	Arachnida	Araneae	Linyphiidae	Tennesseellum	formica			Emerton, 1882		BOLD:AAG5631	Y		Y	Y	BOLD:AAG5631
91	Animalia	Arthropoda	Arachnida	Araneae	Linyphiidae	Tenuiphantes	zebra			Emerton, 1882		BOLD:AAI8098	Y		Y	Y	BOLD:AAI8098
92	Animalia	Arthropoda	Arachnida	Araneae	Linyphiidae	Walckenaeria	directa			O. P.-Cambridge, 1874		BOLD:AAH8313	Y		Y	Y	BOLD:AAH8313
93	Animalia	Arthropoda	Arachnida	Araneae	Linyphiidae	Walckenaeria	fallax			Millidge, 1983		BOLD:AAH8314	Y		Y	Y	BOLD:AAH8314
94	Animalia	Arthropoda	Arachnida	Araneae	Linyphiidae	Walckenaeria	pinocchio			Kaston, 1945		BOLD:ACT1115	Y		Y	Y	BOLD:ACT1115
95	Animalia	Arthropoda	Arachnida	Araneae	Linyphiidae	Walckenaeria	spiralis			Emerton, 1882		BOLD:AAH8314	Y		Y	Y	BOLD:AAH8314
96	Animalia	Arthropoda	Arachnida	Araneae	Lycosidae	Arctosa	emertoni			Gertsch, 1934		BOLD:ACW1682	Y		Y	Y	BOLD:ACW1682
97	Animalia	Arthropoda	Arachnida	Araneae	Lycosidae	Pardosa	distincta			Blackwall, 1846		BOLD:AAC7802	Y		Y	Y	BOLD:AAC7802
98	Animalia	Arthropoda	Arachnida	Araneae	Lycosidae	Pardosa	milvina			Hentz, 1844		BOLD:AAB7668	Y		Y	Y	BOLD:AAB7668
99	Animalia	Arthropoda	Arachnida	Araneae	Lycosidae	Pardosa	modica			Blackwall, 1846		BOLD:AAA5090	Y		Y	Y	BOLD:AAA5090
100	Animalia	Arthropoda	Arachnida	Araneae	Lycosidae	Pardosa	moesta			Banks, 1892		BOLD:AAB0863	Y		Y	Y	BOLD:AAB0863
101	Animalia	Arthropoda	Arachnida	Araneae	Lycosidae	Pardosa	saxatilis			Hentz, 1844		BOLD:AAB7667	Y		Y	Y	BOLD:AAB7667
102	Animalia	Arthropoda	Arachnida	Araneae	Lycosidae	Pirata	piraticus			Clerck, 1757		BOLD:AAB6784	Y		Y	Y	BOLD:AAB6784
103	Animalia	Arthropoda	Arachnida	Araneae	Lycosidae	Pirata	praedo			Kulczynski, 1885		BOLD:AAC5349	Y		Y	Y	BOLD:AAC5349
104	Animalia	Arthropoda	Arachnida	Araneae	Lycosidae	Piratula	cantralli			Wallace & Exline, 1978		BOLD:ABZ5613	Y		Y	Y	BOLD:ABZ5613
105	Animalia	Arthropoda	Arachnida	Araneae	Lycosidae	Piratula	minuta			Emerton, 1885		BOLD:AAE4247	Y		Y	Y	BOLD:AAE4247
106	Animalia	Arthropoda	Arachnida	Araneae	Lycosidae	Schizocosa	avida			Walckenaer, 1837		BOLD:AAD3880	Y		Y	Y	BOLD:AAD3880
107	Animalia	Arthropoda	Arachnida	Araneae	Lycosidae	Schizocosa	crassipalpata			Roewer, 1951		BOLD:AAC4687	Y		Y	Y	BOLD:AAC4687
108	Animalia	Arthropoda	Arachnida	Araneae	Lycosidae	Schizocosa	mccooki			Montgomery, 1904		BOLD:AAH0055	Y		Y	Y	BOLD:AAH0055
109	Animalia	Arthropoda	Arachnida	Araneae	Lycosidae	Schizocosa	ocreata			Hentz, 1844		BOLD:AAA7232	Y		Y	Y	BOLD:AAA7232
110	Animalia	Arthropoda	Arachnida	Araneae	Lycosidae	Trochosa	ruricola			De Geer, 1778		BOLD:AAB0726	Y		Y	Y	BOLD:AAB0726
111	Animalia	Arthropoda	Arachnida	Araneae	Lycosidae	Trochosa	terricola			Thorell, 1856		BOLD:AAB0727	Y		Y	Y	BOLD:AAB0727
112	Animalia	Arthropoda	Arachnida	Araneae	Mimetidae	Mimetus	epeiroides			Emerton, 1882		BOLD:AAG5658	Y		Y	Y	BOLD:AAG5658
113	Animalia	Arthropoda	Arachnida	Araneae	Mimetidae	Mimetus	haynesi			Gertsch & Mulaik, 1940		BOLD:AAK6284	Y		Y	Y	BOLD:AAK6284
114	Animalia	Arthropoda	Arachnida	Araneae	Mimetidae	Mimetus	notius			Chamberlin, 1923			Y		Y	Y
115	Animalia	Arthropoda	Arachnida	Araneae	Philodromidae	Philodromus	cespitum			Walckenaer, 1802		BOLD:AAB3836	Y		Y	Y	BOLD:AAB3836
116	Animalia	Arthropoda	Arachnida	Araneae	Philodromidae	Philodromus	imbecillus			Keyserling, 1880		BOLD:AAI2838	Y		Y	Y	BOLD:AAI2838
117	Animalia	Arthropoda	Arachnida	Araneae	Philodromidae	Philodromus	praelustris			Keyserling, 1880		BOLD:AAD2665	Y		Y	Y	BOLD:AAD2665
118	Animalia	Arthropoda	Arachnida	Araneae	Philodromidae	Philodromus	rufus	vibrans		Dondale			Y		Y	Y
119	Animalia	Arthropoda	Arachnida	Araneae	Philodromidae	Thanatus	coloradensis			Keyserling, 1880		BOLD:AAM7986	Y		Y	Y	BOLD:AAM7986
120	Animalia	Arthropoda	Arachnida	Araneae	Philodromidae	Tibellus	maritimus			Menge, 1875		BOLD:AAA7188	Y		Y	Y	BOLD:AAA7188
121	Animalia	Arthropoda	Arachnida	Araneae	Philodromidae	Tibellus	oblongus			Walckenaer, 1802		BOLD:AAA7188	Y		Y	Y	BOLD:AAA7188
122	Animalia	Arthropoda	Arachnida	Araneae	Phrurolithidae	Phrurotimpus	borealis			Emerton, 1911		BOLD:AAC7234	Y		Y	Y	BOLD:AAC7234
123	Animalia	Arthropoda	Arachnida	Araneae	Phrurolithidae	Scotinella	pugnata			Emerton, 1890		BOLD:AAK7452	Y		Y	Y	BOLD:AAK7452
124	Animalia	Arthropoda	Arachnida	Araneae	Pisauridae	Dolomedes	striatus			Giebel, 1869		BOLD:ACI5773	Y		Y	Y	BOLD:ACI5773
125	Animalia	Arthropoda	Arachnida	Araneae	Pisauridae	Dolomedes	tenebrosus			Hentz, 1844			Y		Y	Y
126	Animalia	Arthropoda	Arachnida	Araneae	Pisauridae	Pisaurina	mira			Walckenaer, 1837		BOLD:AAI2721	Y		Y	Y	BOLD:AAI2721
127	Animalia	Arthropoda	Arachnida	Araneae	Salticidae	Eris	militaris			Hentz, 1845		BOLD:AAA5654	Y		Y	Y	BOLD:AAA5654
128	Animalia	Arthropoda	Arachnida	Araneae	Salticidae	Evarcha	hoyi			Peckham & Peckham, 1883		BOLD:AAC0342|BOLD:ACL8050	Y		Y	Y	BOLD:AAC0342|BOLD:ACL8050
129	Animalia	Arthropoda	Arachnida	Araneae	Salticidae	Habronattus	decorus			Blackwall, 1846			Y		Y	Y
130	Animalia	Arthropoda	Arachnida	Araneae	Salticidae	Marpissa	formosa			Banks, 1892		BOLD:AAG0312	Y		Y	Y	BOLD:AAG0312
131	Animalia	Arthropoda	Arachnida	Araneae	Salticidae	Naphrys	pulex			Hentz, 1846		BOLD:AAC2433	Y		Y	Y	BOLD:AAC2433
132	Animalia	Arthropoda	Arachnida	Araneae	Salticidae	Neon	nelli			Peckham & Peckham, 1888		BOLD:AAD9221	Y		Y	Y	BOLD:AAD9221
133	Animalia	Arthropoda	Arachnida	Araneae	Salticidae	Pelegrina	galathea			Walckenaer, 1837		BOLD:AAB2930	Y		Y	Y	BOLD:AAB2930
134	Animalia	Arthropoda	Arachnida	Araneae	Salticidae	Pelegrina	insignis			Banks, 1892		BOLD:AAB2928	Y		Y	Y	BOLD:AAB2928
135	Animalia	Arthropoda	Arachnida	Araneae	Salticidae	Pelegrina	proterva			Walckenaer, 1837			Y		Y	Y
136	Animalia	Arthropoda	Arachnida	Araneae	Salticidae	Phidippus	audax			Hentz, 1845			Y		Y	Y
137	Animalia	Arthropoda	Arachnida	Araneae	Salticidae	Phidippus	clarus			Keyserling, 1885			Y		Y	Y
138	Animalia	Arthropoda	Arachnida	Araneae	Salticidae	Salticus	scenicus			Clerck, 1757			Y		Y	Y
139	Animalia	Arthropoda	Arachnida	Araneae	Salticidae	Sitticus	floricola	palustris		Peckham and Peckham, 1883			Y		Y	Y
140	Animalia	Arthropoda	Arachnida	Araneae	Salticidae	Synageles	noxiosus			Hentz, 1850		BOLD:ACL8115	Y		Y	Y	BOLD:ACL8115
141	Animalia	Arthropoda	Arachnida	Araneae	Salticidae	Tutelina	harti			Peckham, 1891		BOLD:AAW8769	Y		Y	Y	BOLD:AAW8769
142	Animalia	Arthropoda	Arachnida	Araneae	Salticidae	Tutelina	similis			Banks, 1895		BOLD:AAF6387	Y		Y	Y	BOLD:AAF6387
143	Animalia	Arthropoda	Arachnida	Araneae	Salticidae	Zygoballus	nervosus			Peckham & Peckham, 1888		BOLD:ACA1490	Y		Y	Y	BOLD:ACA1490
144	Animalia	Arthropoda	Arachnida	Araneae	Tetragnathidae	Leucauge	venusta			Walckenaer, 1841		BOLD:AAB8714	Y		Y	Y	BOLD:AAB8714
145	Animalia	Arthropoda	Arachnida	Araneae	Tetragnathidae	Pachygnatha	dorothea			McCook, 1894		BOLD:AAE5304	Y		Y	Y	BOLD:AAE5304
146	Animalia	Arthropoda	Arachnida	Araneae	Tetragnathidae	Pachygnatha	tristriata			C. L. Koch, 1845		BOLD:AAF1571	Y		Y	Y	BOLD:AAF1571
147	Animalia	Arthropoda	Arachnida	Araneae	Tetragnathidae	Pachygnatha	xanthostoma			C. L. Koch, 1845		BOLD:ACO7247|BOLD:ACP5884|BOLD:ACU5364	Y		Y	Y	BOLD:ACO7247|BOLD:ACP5884|BOLD:ACU5364
148	Animalia	Arthropoda	Arachnida	Araneae	Tetragnathidae	Tetragnatha	caudata			Emerton, 1884		BOLD:AAE3958|BOLD:ACN4034|BOLD:AAP3715	Y		Y	Y	BOLD:AAE3958|BOLD:ACN4034|BOLD:AAP3715
149	Animalia	Arthropoda	Arachnida	Araneae	Tetragnathidae	Tetragnatha	extensa			Linnaeus, 1758			Y		Y	Y
150	Animalia	Arthropoda	Arachnida	Araneae	Tetragnathidae	Tetragnatha	guatemalensis			O. P.-Cambridge, 1889			Y		Y	Y
151	Animalia	Arthropoda	Arachnida	Araneae	Tetragnathidae	Tetragnatha	laboriosa			Hentz, 1850		BOLD:AAA6381|BOLD:ACR6860	Y		Y	Y	BOLD:AAA6381|BOLD:ACR6860
152	Animalia	Arthropoda	Arachnida	Araneae	Tetragnathidae	Tetragnatha	shoshone			Levi, 1981		BOLD:AAB7995	Y		Y	Y	BOLD:AAB7995
153	Animalia	Arthropoda	Arachnida	Araneae	Tetragnathidae	Tetragnatha	straminea			Emerton, 1884		BOLD:AAD7095	Y		Y	Y	BOLD:AAD7095
154	Animalia	Arthropoda	Arachnida	Araneae	Tetragnathidae	Tetragnatha	viridis			Walckenaer, 1841		BOLD:AAG5659|BOLD:AAN6335	Y		Y	Y	BOLD:AAG5659|BOLD:AAN6335
155	Animalia	Arthropoda	Arachnida	Araneae	Theridiidae	Dipoena	nigra			Emerton, 1882		BOLD:AAF4974	Y		Y	Y	BOLD:AAF4974
156	Animalia	Arthropoda	Arachnida	Araneae	Theridiidae	Enoplognatha	caricis			Fickert, 1876		BOLD:AAO3896	Y		Y	Y	BOLD:AAO3896
157	Animalia	Arthropoda	Arachnida	Araneae	Theridiidae	Enoplognatha	ovata			Clerck, 1757		BOLD:AAA6910	Y		Y	Y	BOLD:AAA6910
158	Animalia	Arthropoda	Arachnida	Araneae	Theridiidae	Euryopis	funebris			Hentz, 1850		BOLD:AAJ0542	Y		Y	Y	BOLD:AAJ0542
159	Animalia	Arthropoda	Arachnida	Araneae	Theridiidae	Hentziectypus	globosus			Hentz, 1850		BOLD:AAN6263	Y		Y	Y	BOLD:AAN6263
160	Animalia	Arthropoda	Arachnida	Araneae	Theridiidae	Neospintharus	trigonum			Hentz, 1850		BOLD:AAB0273	Y		Y	Y	BOLD:AAB0273
161	Animalia	Arthropoda	Arachnida	Araneae	Theridiidae	Neottiura	bimaculata			Linnaeus, 1767		BOLD:AAK8332|BOLD:ACN7831	Y		Y	Y	BOLD:AAK8332|BOLD:ACN7831
162	Animalia	Arthropoda	Arachnida	Araneae	Theridiidae	Parasteatoda	tabulata			Levi, 1980			Y		Y	Y
163	Animalia	Arthropoda	Arachnida	Araneae	Theridiidae	Parasteatoda	tepidariorum			C. L. Koch, 1841		BOLD:AAC0175	Y		Y	Y	BOLD:AAC0175
164	Animalia	Arthropoda	Arachnida	Araneae	Theridiidae	Theridion	albidum			Banks, 1895		BOLD:AAV3042	Y		Y	Y	BOLD:AAV3042
165	Animalia	Arthropoda	Arachnida	Araneae	Theridiidae	Theridion	differens			Emerton, 1882		BOLD:AAC3269	Y		Y	Y	BOLD:AAC3269
166	Animalia	Arthropoda	Arachnida	Araneae	Theridiidae	Theridion	glaucescens			Becker, 1879		BOLD:AAG1794	Y		Y	Y	BOLD:AAG1794
167	Animalia	Arthropoda	Arachnida	Araneae	Theridiidae	Theridion	murarium			Emerton, 1882		BOLD:AAC6350	Y		Y	Y	BOLD:AAC6350
168	Animalia	Arthropoda	Arachnida	Araneae	Theridiidae	Theridula	emertoni			Levi, 1954		BOLD:AAD2291	Y		Y	Y	BOLD:AAD2291
169	Animalia	Arthropoda	Arachnida	Araneae	Theridiidae	Thymoites	unimaculatus			Emerton, 1882		BOLD:AAE7853	Y		Y	Y	BOLD:AAE7853
170	Animalia	Arthropoda	Arachnida	Araneae	Theridiidae	Yunohamella	lyrica			Walckenaer, 1841		BOLD:AAG4815	Y		Y	Y	BOLD:AAG4815
171	Animalia	Arthropoda	Arachnida	Araneae	Thomisidae	Mecaphesa	asperata			Hentz, 1847		BOLD:ACE7683	Y		Y	Y	BOLD:ACE7683
172	Animalia	Arthropoda	Arachnida	Araneae	Thomisidae	Misumena	vatia			Clerck, 1757		BOLD:AAA6275	Y		Y	Y	BOLD:AAA6275
173	Animalia	Arthropoda	Arachnida	Araneae	Thomisidae	Misumenoides	formosipes			Walckenaer, 1837			Y		Y	Y
174	Animalia	Arthropoda	Arachnida	Araneae	Thomisidae	Misumessus	oblongus			Keyserling, 1880			Y		Y	Y
175	Animalia	Arthropoda	Arachnida	Araneae	Thomisidae	Ozyptila	americana			Banks, 1895			Y		Y	Y
176	Animalia	Arthropoda	Arachnida	Araneae	Thomisidae	Ozyptila	praticola			C. L. Koch, 1837		BOLD:AAC7413	Y		Y	Y	BOLD:AAC7413
177	Animalia	Arthropoda	Arachnida	Araneae	Thomisidae	Tmarus	angulatus			Walckenaer, 1837		BOLD:ABY7475	Y		Y	Y	BOLD:ABY7475
178	Animalia	Arthropoda	Arachnida	Araneae	Thomisidae	Xysticus	bicuspis			Keyserling, 1887		BOLD:AAJ9685	Y		Y	Y	BOLD:AAJ9685
179	Animalia	Arthropoda	Arachnida	Araneae	Thomisidae	Xysticus	discursans			Keyserling, 1880		BOLD:AAJ9718|BOLD:ACV2014|BOLD:ACV5078	Y		Y	Y	BOLD:AAJ9718|BOLD:ACV2014|BOLD:ACV5078
180	Animalia	Arthropoda	Arachnida	Araneae	Thomisidae	Xysticus	elegans			Keyserling, 1880		BOLD:AAC1568	Y		Y	Y	BOLD:AAC1568
181	Animalia	Arthropoda	Arachnida	Araneae	Thomisidae	Xysticus	emertoni			Keyserling, 1880		BOLD:AAB4300	Y		Y	Y	BOLD:AAB4300
182	Animalia	Arthropoda	Arachnida	Araneae	Thomisidae	Xysticus	funestus			Keyserling, 1880			Y		Y	Y
183	Animalia	Arthropoda	Arachnida	Araneae	Thomisidae	Xysticus	luctans			C. L. Koch, 1845		BOLD:AAF8190	Y		Y	Y	BOLD:AAF8190
184	Animalia	Arthropoda	Arachnida	Araneae	Thomisidae	Xysticus	punctatus			Keyserling, 1880		BOLD:AAD2346	Y		Y	Y	BOLD:AAD2346
185	Animalia	Arthropoda	Arachnida	Araneae	Thomisidae	Xysticus	winnipegensis			Turnbull, Dondale & Redner, 1965		BOLD:AAM6956	Y		Y	Y	BOLD:AAM6956
186	Animalia	Arthropoda	Arachnida	Araneae	Uloboridae	Uloborus	glomosus			Walckenaer, 1841		BOLD:AAJ7823	Y		Y	Y	BOLD:AAJ7823
187	Animalia	Arthropoda	Arachnida	Mesostigmata	Ascidae	Arctoseius	cetratus			Sellnick, 1940		BOLD:ACF8021	Y		Y	Y	BOLD:ACF8021
188	Animalia	Arthropoda	Arachnida	Mesostigmata	Rhodacaridae	Rhodacarellus	silesiacus			Willmann, 1935			Y		Y	Y
189	Animalia	Arthropoda	Arachnida	Opiliones	Phalangiidae	Oligolophus	tridens			C. L. Koch, 1836		BOLD:AAM8194	Y		Y	Y	BOLD:AAM8194
190	Animalia	Arthropoda	Arachnida	Opiliones	Phalangiidae	Phalangium	opilio			Linnaeus, 1758		BOLD:AAI4346	Y		Y	Y	BOLD:AAI4346
191	Animalia	Arthropoda	Arachnida	Opiliones	Phalangiidae	Platybunus	triangularis			Herbst, 1799		BOLD:ABW0506	Y		Y	Y	BOLD:ABW0506
192	Animalia	Arthropoda	Arachnida	Opiliones	Sclerosomatidae	Leiobunum	aldrichi			Weed, 1893		BOLD:AAH7061	Y		Y	Y	BOLD:AAH7061
193	Animalia	Arthropoda	Arachnida	Opiliones	Sclerosomatidae	Leiobunum	ventricosum			Wood, 1868			Y		Y	Y
194	Animalia	Arthropoda	Arachnida	Sarcoptiformes	Euzetidae	Euzetes	globulus			Nicolet, 1855		BOLD:AAF9090	Y		Y	Y	BOLD:AAF9090
195	Animalia	Arthropoda	Arachnida	Sarcoptiformes	Gustaviidae	Gustavia	microcephala			Nicolet, 1855		BOLD:ACE3149	Y		Y	Y	BOLD:ACE3149
196	Animalia	Arthropoda	Arachnida	Sarcoptiformes	Liacaridae	Dorycranosus	acutidens			Aoki, 1965		BOLD:AAF9274	Y		Y	Y	BOLD:AAF9274
197	Animalia	Arthropoda	Arachnida	Sarcoptiformes	Mochlozetidae	Podoribates	pratensis			Banks, 1895		BOLD:AAF9173	Y		Y	Y	BOLD:AAF9173
198	Animalia	Arthropoda	Arachnida	Sarcoptiformes	Mycobatidae	Punctoribates	punctum			Koch, 1839		BOLD:AAH6516|BOLD:ACB6310	Y		Y	Y	BOLD:AAH6516|BOLD:ACB6310
199	Animalia	Arthropoda	Arachnida	Sarcoptiformes	Oppiidae	Oppia	nitens			Koch, 1836		BOLD:AAF0868	Y		Y	Y	BOLD:AAF0868
200	Animalia	Arthropoda	Arachnida	Sarcoptiformes	Oribatulidae	Oribatula	tibialis			Nicolet, 1855		BOLD:ACI4357	Y		Y	Y	BOLD:ACI4357
201	Animalia	Arthropoda	Arachnida	Sarcoptiformes	Scheloribatidae	Scheloribates	clavilanceolatus			Ewing, 1907		BOLD:AAF9097	Y		Y	Y	BOLD:AAF9097
202	Animalia	Arthropoda	Arachnida	Sarcoptiformes	Tectocepheidae	Tectocepheus	sarekensis			Trägårdh, 1910		BOLD:AAM3402|BOLD:AAM4355	Y		Y	Y	BOLD:AAM3402|BOLD:AAM4355
203	Animalia	Arthropoda	Arachnida	Trombidiformes	Arrenuridae	Arrenurus	reflexus			Marshall, 1908		BOLD:AAE6722	Y		Y	Y	BOLD:AAE6722
204	Animalia	Arthropoda	Branchiopoda	Diplostraca	Bosminidae	Bosmina	liederi			De Melo and Hebert, 1994			Y		Y	Y
205	Animalia	Arthropoda	Branchiopoda	Diplostraca	Eurycercidae	Eurycercus	longirostris			Hann, 1982			Y		Y	Y
206	Animalia	Arthropoda	Chilopoda	Geophilomorpha	Schendylidae	Schendyla	nemorensis			C.L.Koch, 1837		BOLD:AAG8560	Y		Y	Y	BOLD:AAG8560
207	Animalia	Arthropoda	Chilopoda	Lithobiomorpha	Lithobiidae	Lithobius	microps			Meinert, 1868		BOLD:AAH6432	Y		Y	Y	BOLD:AAH6432
208	Animalia	Arthropoda	Collembola	Entomobryomorpha	Entomobryidae	Entomobrya	atrocincta			Schott, 1896		BOLD:ACE5102	Y		Y	Y	BOLD:ACE5102
209	Animalia	Arthropoda	Collembola	Entomobryomorpha	Entomobryidae	Entomobrya	nivalis			Linnaeus, 1758		BOLD:ACL6239	Y		Y	Y	BOLD:ACL6239
210	Animalia	Arthropoda	Collembola	Entomobryomorpha	Entomobryidae	Lepidocyrtus	paradoxus			Uzel, 1891			Y		Y	Y
211	Animalia	Arthropoda	Collembola	Entomobryomorpha	Entomobryidae	Orchesella	villosa			Linnaeus, 1767		BOLD:AAA8726	Y		Y	Y	BOLD:AAA8726
212	Animalia	Arthropoda	Collembola	Entomobryomorpha	Entomobryidae	Pseudosinella	octopunctata			Boerner, 1901		BOLD:AAA9292	Y		Y	Y	BOLD:AAA9292
213	Animalia	Arthropoda	Collembola	Entomobryomorpha	Isotomidae	Parisotoma	notabilis			Schaffer, 1896			Y		Y	Y
214	Animalia	Arthropoda	Collembola	Poduromorpha	Hypogastruridae	Ceratophysella	bengtssoni			Ågren, 1904		BOLD:AAI3738	Y		Y	Y	BOLD:AAI3738
215	Animalia	Arthropoda	Collembola	Symphypleona	Dicyrtomidae	Dicyrtomina	minuta			Fabricius, 1783			Y		Y	Y
216	Animalia	Arthropoda	Collembola	Symphypleona	Katiannidae	Sminthurinus	elegans			Fitch, 1862		BOLD:AAB3495|BOLD:AAB3496	Y		Y	Y	BOLD:AAB3495|BOLD:AAB3496
217	Animalia	Arthropoda	Diplopoda	Julida	Julidae	Brachyiulus	pusillus			Leach, 1815		BOLD:AAM7944	Y		Y	Y	BOLD:AAM7944
218	Animalia	Arthropoda	Diplopoda	Julida	Julidae	Cylindroiulus	caeruleocinctus			Wood, 1864		BOLD:AAH7472	Y		Y	Y	BOLD:AAH7472
219	Animalia	Arthropoda	Diplopoda	Julida	Julidae	Julus	scandinavius			Latzel, 1884		BOLD:AAH7469	Y		Y	Y	BOLD:AAH7469
220	Animalia	Arthropoda	Diplopoda	Julida	Julidae	Ophyiulus	pilosus			Newport, 1843			Y		Y	Y
221	Animalia	Arthropoda	Insecta	Coleoptera	Anobiidae	Caenocara	sp.						N	Y
222	Animalia	Arthropoda	Insecta	Coleoptera	Anobiidae	Ptilinus	ruficornis			Say, 1823			Y	Y
223	Animalia	Arthropoda	Insecta	Coleoptera	Anthicidae	Malporus	formicarius			LaFerté-Sénectère, 1849		BOLD:ACF8552	Y	Y	Y	Y	BOLD:ACF8552
224	Animalia	Arthropoda	Insecta	Coleoptera	Anthicidae	Notoxus	desertus			Casey, 1895		BOLD:ABX0657	Y	Y	Y	Y	BOLD:ABX0657
225	Animalia	Arthropoda	Insecta	Coleoptera	Anthicidae	Stricticomus	tobias			Marseul, 1879		BOLD:AAQ1028	Y		Y	Y	BOLD:AAQ1028
226	Animalia	Arthropoda	Insecta	Coleoptera	Anthribidae	Anthribus	nebulosus			Forster, 1770		BOLD:AAO1339	Y		Y	Y	BOLD:AAO1339
227	Animalia	Arthropoda	Insecta	Coleoptera	Anthribidae	Ormiscus	walshii			LeConte, 1876		BOLD:AAU7341	Y		Y	Y	BOLD:AAU7341
228	Animalia	Arthropoda	Insecta	Coleoptera	Buprestidae	Agrilus	sulciollis			Lacordaire, 1835			Y	Y
229	Animalia	Arthropoda	Insecta	Coleoptera	Byrrhidae	Simplocaria	semistriata			Fabricius, 1801		BOLD:ABW1696	Y		Y	Y	BOLD:ABW1696
230	Animalia	Arthropoda	Insecta	Coleoptera	Byturidae	Byturus	unicolor			Say, 1823			Y	Y
231	Animalia	Arthropoda	Insecta	Coleoptera	Cantharidae	Cantharis	rufa			Linnaeus, 1758			Y	Y
232	Animalia	Arthropoda	Insecta	Coleoptera	Cantharidae	Chauliognathus	pensylvanicus			DeGeer, 1774			Y	Y	Y	Y
233	Animalia	Arthropoda	Insecta	Coleoptera	Cantharidae	Rhagonycha	fulva			Scopoli, 1763			Y	Y	Y	Y
234	Animalia	Arthropoda	Insecta	Coleoptera	Cantharidae	Rhaxonycha	carolina			Fabricius, 1801			Y	Y
235	Animalia	Arthropoda	Insecta	Coleoptera	Carabidae	Agonoleptus	conjunctus			Say, 1823		BOLD:AAE9008	Y	Y	Y	Y	BOLD:AAE9008
236	Animalia	Arthropoda	Insecta	Coleoptera	Carabidae	Agonum	fidele			Casey, 1920			Y	Y
237	Animalia	Arthropoda	Insecta	Coleoptera	Carabidae	Agonum	gratiosum			Mannerheim, 1853			Y	Y
238	Animalia	Arthropoda	Insecta	Coleoptera	Carabidae	Amara	angustata			Say, 1823			Y	Y
239	Animalia	Arthropoda	Insecta	Coleoptera	Carabidae	Amara	rubrica			Haldeman, 1843		BOLD:AAM7658	Y		Y	Y	BOLD:AAM7658
240	Animalia	Arthropoda	Insecta	Coleoptera	Carabidae	Bembidion	frontale			LeConte, 1847		BOLD:AAU7150	Y		Y	Y	BOLD:AAU7150
241	Animalia	Arthropoda	Insecta	Coleoptera	Carabidae	Bembidion	obtusum			Audinet-Serville, 1821		BOLD:AAP9490	Y		Y	Y	BOLD:AAP9490
242	Animalia	Arthropoda	Insecta	Coleoptera	Carabidae	Calleida	punctata			LeConte, 1846			Y	Y
243	Animalia	Arthropoda	Insecta	Coleoptera	Carabidae	Carabus	granulatus			Linnaeus, 1758			Y	Y
244	Animalia	Arthropoda	Insecta	Coleoptera	Carabidae	Carabus	nemoralis			Müller, 1764			Y		Y	Y
245	Animalia	Arthropoda	Insecta	Coleoptera	Carabidae	Chlaenius	tricolor			Dejean, 1826			Y	Y
246	Animalia	Arthropoda	Insecta	Coleoptera	Carabidae	Clivina	fossor			Linnaeus, 1758		BOLD:AAH0274	Y		Y	Y	BOLD:AAH0274
247	Animalia	Arthropoda	Insecta	Coleoptera	Carabidae	Colliuris	pensylvanica			Linnaeus, 1758			Y	Y
248	Animalia	Arthropoda	Insecta	Coleoptera	Carabidae	Dyschirius	setosus			LeConte, 1857			Y	Y
249	Animalia	Arthropoda	Insecta	Coleoptera	Carabidae	Elaphrus	clairvillei			Kirby, 1837			Y	Y
250	Animalia	Arthropoda	Insecta	Coleoptera	Carabidae	Lebia	fuscata			Dejean, 1825		BOLD:AAH0212	Y		Y	Y	BOLD:AAH0212
251	Animalia	Arthropoda	Insecta	Coleoptera	Carabidae	Lebia	solea			Hentz, 1830			Y	Y
252	Animalia	Arthropoda	Insecta	Coleoptera	Carabidae	Lebia	viridis			Say, 1823		BOLD:AAH0141	Y	Y	Y	Y	BOLD:AAH0141
253	Animalia	Arthropoda	Insecta	Coleoptera	Carabidae	Platynus	hypolithos			Say, 1823			Y	Y
254	Animalia	Arthropoda	Insecta	Coleoptera	Carabidae	Pterostichus	melanarius			Illiger, 1798			Y		Y	Y
255	Animalia	Arthropoda	Insecta	Coleoptera	Cerambycidae	Acalymma	vittata			Barber, 1947			Y	Y
256	Animalia	Arthropoda	Insecta	Coleoptera	Cerambycidae	Astylopsis	macula			Say, 1826			Y	Y
257	Animalia	Arthropoda	Insecta	Coleoptera	Cerambycidae	Astylopsis	sexguttata			Say, 1826			Y	Y
258	Animalia	Arthropoda	Insecta	Coleoptera	Cerambycidae	Bellamira	scalaris			Say, 1826			Y	Y
259	Animalia	Arthropoda	Insecta	Coleoptera	Cerambycidae	Calligrapha	californica	coreopsivora		Brown			Y	Y
260	Animalia	Arthropoda	Insecta	Coleoptera	Cerambycidae	Chaetocnema	sp.						N	Y
261	Animalia	Arthropoda	Insecta	Coleoptera	Cerambycidae	Charidotella	sexpunctata	bicolor		Fabricius, 1798			Y	Y
262	Animalia	Arthropoda	Insecta	Coleoptera	Cerambycidae	Chrysochus	auratus			Fabricius, 1775			Y	Y
263	Animalia	Arthropoda	Insecta	Coleoptera	Cerambycidae	Chrysolina	hudsonica			Brown, 1938			Y	Y
264	Animalia	Arthropoda	Insecta	Coleoptera	Cerambycidae	Cicindela	punctulata	punctulata		Olivier			Y	Y
265	Animalia	Arthropoda	Insecta	Coleoptera	Cerambycidae	Cicindela	sexguttata			Fabricius, 1775			Y	Y
266	Animalia	Arthropoda	Insecta	Coleoptera	Cerambycidae	Clytus	ruricola			Olivier, 1795			Y	Y
267	Animalia	Arthropoda	Insecta	Coleoptera	Cerambycidae	Crepidodera	sp.						N	Y
268	Animalia	Arthropoda	Insecta	Coleoptera	Cerambycidae	Cyrtophorus	verrucosus			Olivier, 1795		BOLD:AAD4513	Y		Y	Y	BOLD:AAD4513
269	Animalia	Arthropoda	Insecta	Coleoptera	Cerambycidae	Deloyala	guttata			Olivier, 1790			Y	Y
270	Animalia	Arthropoda	Insecta	Coleoptera	Cerambycidae	Dibolia	sp.						N	Y
271	Animalia	Arthropoda	Insecta	Coleoptera	Cerambycidae	Epitrix	sp.						N	Y
272	Animalia	Arthropoda	Insecta	Coleoptera	Cerambycidae	Euderces	picipes			Fabricius, 1787			Y	Y
273	Animalia	Arthropoda	Insecta	Coleoptera	Cerambycidae	Gaurotes	cyanipennis			Say, 1824		BOLD:AAI7042	Y		Y	Y	BOLD:AAI7042
274	Animalia	Arthropoda	Insecta	Coleoptera	Cerambycidae	Longitarsus	sp.						N	Y
275	Animalia	Arthropoda	Insecta	Coleoptera	Cerambycidae	Mantura	floridana			Crotch, 1873			Y	Y
276	Animalia	Arthropoda	Insecta	Coleoptera	Cerambycidae	Megacyllene	robiniae			Forster, 1771			Y	Y
277	Animalia	Arthropoda	Insecta	Coleoptera	Cerambycidae	Molorchus	bimaculatus			Say, 1824		BOLD:AAH0019	Y		Y	Y	BOLD:AAH0019
278	Animalia	Arthropoda	Insecta	Coleoptera	Cerambycidae	Neoclytus	acuminatus	acuminatus		Fabricius			Y	Y
279	Animalia	Arthropoda	Insecta	Coleoptera	Cerambycidae	Oberea	tripunctata			Swederus, 1787			Y	Y
280	Animalia	Arthropoda	Insecta	Coleoptera	Cerambycidae	Obrium	rufulum			Gahan, 1908			Y	Y
281	Animalia	Arthropoda	Insecta	Coleoptera	Cerambycidae	Oulema	palustris			Blatchley, 1913			Y	Y
282	Animalia	Arthropoda	Insecta	Coleoptera	Cerambycidae	Paria	sp.						N	Y
283	Animalia	Arthropoda	Insecta	Coleoptera	Cerambycidae	Phyllotreta	sp.						N	Y
284	Animalia	Arthropoda	Insecta	Coleoptera	Cerambycidae	Phymatodes	amoenus			Say, 1824			Y	Y
285	Animalia	Arthropoda	Insecta	Coleoptera	Cerambycidae	Plagiodera	versicolor			Laicharting, 1781			Y	Y
286	Animalia	Arthropoda	Insecta	Coleoptera	Cerambycidae	Psylliodes	punctulata			Melsheimer, 1847			Y	Y
287	Animalia	Arthropoda	Insecta	Coleoptera	Cerambycidae	Pyrrhalta	sp.						N	Y
288	Animalia	Arthropoda	Insecta	Coleoptera	Cerambycidae	Systena	blanda			F. E. Melsheimer, 1847			Y	Y
289	Animalia	Arthropoda	Insecta	Coleoptera	Cerambycidae	Tetraopes	tetrophthalmus			Forster, 1771			Y	Y
290	Animalia	Arthropoda	Insecta	Coleoptera	Cerambycidae	Tetrops	praeusta			Linnaeus, 1758		BOLD:AAE9431	Y		Y	Y	BOLD:AAE9431
291	Animalia	Arthropoda	Insecta	Coleoptera	Cerambycidae	Trigonarthris	proxima			Say, 1824			Y	Y
292	Animalia	Arthropoda	Insecta	Coleoptera	Cerambycidae	Trirhabda	sp.						N	Y
293	Animalia	Arthropoda	Insecta	Coleoptera	Cerambycidae	Typocerus	velutinus	velutinus		Olivier			Y	Y
294	Animalia	Arthropoda	Insecta	Coleoptera	Cerambycidae	Urgleptes	querci			Fitch, 1858			Y	Y
295	Animalia	Arthropoda	Insecta	Coleoptera	Cerambycidae	Xylotrechus	convergens			LeConte, 1873			Y	Y
296	Animalia	Arthropoda	Insecta	Coleoptera	Cerambycidae	Xylotrechus	gemellus			Casey, 1893			Y	Y
297	Animalia	Arthropoda	Insecta	Coleoptera	Cerambycidae	Zeugophora	varians			Crotch, 1873			Y	Y
298	Animalia	Arthropoda	Insecta	Coleoptera	Cerylonidae	Philothermus	glabriculus			LeConte, 1863		BOLD:ABX9329	Y		Y	Y	BOLD:ABX9329
299	Animalia	Arthropoda	Insecta	Coleoptera	Chrysomelidae	Altica	chalybea			Illiger, 1807			Y		Y	Y
300	Animalia	Arthropoda	Insecta	Coleoptera	Chrysomelidae	Altica	sp.						N	Y
301	Animalia	Arthropoda	Insecta	Coleoptera	Chrysomelidae	Cassida	rubiginosa			Müller, 1776		BOLD:AAO0522	Y		Y	Y	BOLD:AAO0522
302	Animalia	Arthropoda	Insecta	Coleoptera	Chrysomelidae	Crepidodera	heikertingeri			Lazorko, 1974		BOLD:AAG4462	Y		Y	Y	BOLD:AAG4462
303	Animalia	Arthropoda	Insecta	Coleoptera	Chrysomelidae	Dibolia	borealis			Chevrolat in Guérin-Méneville, 1834		BOLD:AAL0908	Y		Y	Y	BOLD:AAL0908
304	Animalia	Arthropoda	Insecta	Coleoptera	Chrysomelidae	Epitrix	cucumeris			Harris, 1851		BOLD:ABA9101	Y		Y	Y	BOLD:ABA9101
305	Animalia	Arthropoda	Insecta	Coleoptera	Chrysomelidae	Exema	canadensis			Pierce, 1940			Y	Y	Y	Y
306	Animalia	Arthropoda	Insecta	Coleoptera	Chrysomelidae	Helocassis	clavata			Fabricius, 1798			Y	Y
307	Animalia	Arthropoda	Insecta	Coleoptera	Chrysomelidae	Microrhopala	vittata			Fabricius, 1798			Y	Y	Y	Y
308	Animalia	Arthropoda	Insecta	Coleoptera	Chrysomelidae	Neogalerucella	calmariensis			Linnaeus, 1767		BOLD:AAL2945	Y		Y	Y	BOLD:AAL2945
309	Animalia	Arthropoda	Insecta	Coleoptera	Chrysomelidae	Ophraella	conferta			J. L. LeConte, 1865		BOLD:ACF8270	Y		Y	Y	BOLD:ACF8270
310	Animalia	Arthropoda	Insecta	Coleoptera	Chrysomelidae	Paria	fragariae			Wilcox, 1954		BOLD:ABA3960|BOLD:ACF6671	Y		Y	Y	BOLD:ABA3960|BOLD:ACF6671
311	Animalia	Arthropoda	Insecta	Coleoptera	Chrysomelidae	Phyllotreta	striolata			Fabricius, 1801		BOLD:AAL5267	Y	Y	Y	Y	BOLD:AAL5267
312	Animalia	Arthropoda	Insecta	Coleoptera	Chrysomelidae	Plagiodera	versicolora			Laicharting, 1781			Y		Y	Y
313	Animalia	Arthropoda	Insecta	Coleoptera	Chrysomelidae	Psylliodes	affinis			Paykull, 1799		BOLD:AAU6967	Y	Y	Y	Y	BOLD:AAU6967
314	Animalia	Arthropoda	Insecta	Coleoptera	Chrysomelidae	Psylliodes	napi			Fabricius, 1792			Y		Y	Y
315	Animalia	Arthropoda	Insecta	Coleoptera	Chrysomelidae	Psylliodes	picinus			Marsham, 1802			Y		Y	Y
316	Animalia	Arthropoda	Insecta	Coleoptera	Chrysomelidae	Pyrrhalta	viburni			Paykull, 1799			Y		Y	Y
317	Animalia	Arthropoda	Insecta	Coleoptera	Chrysomelidae	Trirhabda	borealis			Blake, 1931		BOLD:AAG4458	Y		Y	Y	BOLD:AAG4458
318	Animalia	Arthropoda	Insecta	Coleoptera	Chrysomelidae	Xanthonia	decemnotata			Say, 1824		BOLD:ABA6335|BOLD:ACJ0239	Y		Y	Y	BOLD:ABA6335|BOLD:ACJ0239
319	Animalia	Arthropoda	Insecta	Coleoptera	Ciidae	Ceracis	thoracicornis			Ziegler, 1845			Y		Y	Y
320	Animalia	Arthropoda	Insecta	Coleoptera	Cleridae	Cymatodera	bicolor			Say, 1825		BOLD:AAU6910	Y		Y	Y	BOLD:AAU6910
321	Animalia	Arthropoda	Insecta	Coleoptera	Cleridae	Enoclerus	nigripes			Say, 1823		BOLD:AAU6970	Y		Y	Y	BOLD:AAU6970
322	Animalia	Arthropoda	Insecta	Coleoptera	Cleridae	Enoclerus	rosmarus			Say, 1823			Y	Y
323	Animalia	Arthropoda	Insecta	Coleoptera	Cleridae	Isohydnocera	curtipennis			Newman			Y	Y
324	Animalia	Arthropoda	Insecta	Coleoptera	Cleridae	Phyllobaenus	verticalis			Say, 1835			Y	Y
325	Animalia	Arthropoda	Insecta	Coleoptera	Cleridae	Placopterus	thoracicus			Olivier, 1795		BOLD:AAP8584	Y	Y	Y	Y	BOLD:AAP8584
326	Animalia	Arthropoda	Insecta	Coleoptera	Cleridae	Zenodosus	sanguineus			Say, 1835		BOLD:ABA6311	Y		Y	Y	BOLD:ABA6311
327	Animalia	Arthropoda	Insecta	Coleoptera	Coccinellidae	Coccinella	septempunctata			Linnaeus, 1758			Y	Y	Y	Y
328	Animalia	Arthropoda	Insecta	Coleoptera	Coccinellidae	Coleomegilla	maculata			De Geer, 1775		BOLD:AAD7604	Y		Y	Y	BOLD:AAD7604
329	Animalia	Arthropoda	Insecta	Coleoptera	Coccinellidae	Coleomegilla	maculata	lengi		Timberlake			Y	Y
330	Animalia	Arthropoda	Insecta	Coleoptera	Coccinellidae	Didion	punctatum			Melsheimer, 1847			Y	Y
331	Animalia	Arthropoda	Insecta	Coleoptera	Coccinellidae	Harmonia	axyridis			Pallas, 1773		BOLD:AAB5640	Y	Y	Y	Y	BOLD:AAB5640
332	Animalia	Arthropoda	Insecta	Coleoptera	Coccinellidae	Hippodamia	glacialis			Fabricius, 1775		BOLD:AAH3305	Y		Y	Y	BOLD:AAH3305
333	Animalia	Arthropoda	Insecta	Coleoptera	Coccinellidae	Hippodamia	variegata			Goeze, 1777			Y	Y
334	Animalia	Arthropoda	Insecta	Coleoptera	Coccinellidae	Hyperaspis	binotata			Say, 1826			Y		Y	Y
335	Animalia	Arthropoda	Insecta	Coleoptera	Coccinellidae	Hyperaspis	cf. binotata						N	Y
336	Animalia	Arthropoda	Insecta	Coleoptera	Coccinellidae	Propylaea	quatuordecimpunctata			Linnaeus, 1758		BOLD:AAF6935	Y		Y	Y	BOLD:AAF6935
337	Animalia	Arthropoda	Insecta	Coleoptera	Coccinellidae	Propylea	quatuordecimpunctata			Linnaeus, 1758			Y	Y
338	Animalia	Arthropoda	Insecta	Coleoptera	Coccinellidae	Psyllobora	vigintimaculata	maculata		Say			Y	Y
339	Animalia	Arthropoda	Insecta	Coleoptera	Coccinellidae	Scymnus	sp.						N	Y
340	Animalia	Arthropoda	Insecta	Coleoptera	Coccinellidae	Stethorus	punctillum			Weise, 1891		BOLD:AAN6149	Y		Y	Y	BOLD:AAN6149
341	Animalia	Arthropoda	Insecta	Coleoptera	Corylophidae	Orthoperus	scutellaris			LeConte, 1878		BOLD:AAU7040	Y		Y	Y	BOLD:AAU7040
342	Animalia	Arthropoda	Insecta	Coleoptera	Corylophidae	Sericoderus	lateralis			Gyllenhal, 1827		BOLD:ABA2914	Y		Y	Y	BOLD:ABA2914
343	Animalia	Arthropoda	Insecta	Coleoptera	Cryptophagidae	Atomaria	ephippiata			Zimmermann, 1869			Y		Y	Y
344	Animalia	Arthropoda	Insecta	Coleoptera	Curculionidae	Acoptus	suturalis			LeConte, 1876		BOLD:AAU6930	Y		Y	Y	BOLD:AAU6930
345	Animalia	Arthropoda	Insecta	Coleoptera	Curculionidae	Barypeithes	pellucidus			Boheman, 1834		BOLD:AAG5192	Y	Y	Y	Y	BOLD:AAG5192
346	Animalia	Arthropoda	Insecta	Coleoptera	Curculionidae	Hylesinus	aculeatus			Say, 1824		BOLD:AAU7331	Y	Y	Y	Y	BOLD:AAU7331
347	Animalia	Arthropoda	Insecta	Coleoptera	Curculionidae	Hypera	zoilus			Scopoli, 1763			Y		Y	Y
348	Animalia	Arthropoda	Insecta	Coleoptera	Curculionidae	Isochnus	sequensi			Stierlin 1894		BOLD:ACA3052	Y		Y	Y	BOLD:ACA3052
349	Animalia	Arthropoda	Insecta	Coleoptera	Curculionidae	Madarellus	undulatus			Say, 1824		BOLD:AAY6533	Y		Y	Y	BOLD:AAY6533
350	Animalia	Arthropoda	Insecta	Coleoptera	Curculionidae	Monarthrum	mali			Fitch, 1855		BOLD:ACD0202	Y		Y	Y	BOLD:ACD0202
351	Animalia	Arthropoda	Insecta	Coleoptera	Curculionidae	Orchestes	alni			Linnaeus 1758		BOLD:AAM7726	Y		Y	Y	BOLD:AAM7726
352	Animalia	Arthropoda	Insecta	Coleoptera	Curculionidae	Phyllobius	oblongus			Linnaeus, 1758		BOLD:AAF9187	Y	Y	Y	Y	BOLD:AAF9187
353	Animalia	Arthropoda	Insecta	Coleoptera	Curculionidae	Pityogenes	hopkinsi			Swaine, 1915		BOLD:ABW5076	Y		Y	Y	BOLD:ABW5076
354	Animalia	Arthropoda	Insecta	Coleoptera	Curculionidae	Polydrusus	impressifrons			Gyllenhal, 1834		BOLD:AAO4332	Y		Y	Y	BOLD:AAO4332
355	Animalia	Arthropoda	Insecta	Coleoptera	Curculionidae	Sitona	lineellus			Bonsdorff, 1785			Y		Y	Y
356	Animalia	Arthropoda	Insecta	Coleoptera	Curculionidae	Tychius	meliloti			Stephens, 1831		BOLD:AAM7740	Y		Y	Y	BOLD:AAM7740
357	Animalia	Arthropoda	Insecta	Coleoptera	Curculionidae	Xyleborinus	alni			Niijima 1909		BOLD:AAB2754	Y		Y	Y	BOLD:AAB2754
358	Animalia	Arthropoda	Insecta	Coleoptera	Curculionidae	Xyleborinus	saxeseni			Ratzeburg, 1837		BOLD:AAB9578	Y	Y	Y	Y	BOLD:AAB9578
359	Animalia	Arthropoda	Insecta	Coleoptera	Curculionidae	Xyleborus	dispar			Fabricius, 1792		BOLD:AAD0158	Y	Y	Y	Y	BOLD:AAD0158
360	Animalia	Arthropoda	Insecta	Coleoptera	Curculionidae	Xylosandrus	germanus			Blandford, 1894		BOLD:AAF7523	Y	Y	Y	Y	BOLD:AAF7523
361	Animalia	Arthropoda	Insecta	Coleoptera	Dytiscidae	Desmopachria	convexa			Aubé, 1838			Y		Y	Y
362	Animalia	Arthropoda	Insecta	Coleoptera	Elateridae	Aeolus	mellillus			Say, 1836			Y	Y
363	Animalia	Arthropoda	Insecta	Coleoptera	Elateridae	Ampedus	areolatus			Say, 1823		BOLD:ACM2015	Y	Y	Y	Y	BOLD:ACM2015
364	Animalia	Arthropoda	Insecta	Coleoptera	Elateridae	Ampedus	linteus			Say, 1839		BOLD:AAU7141	Y		Y	Y	BOLD:AAU7141
365	Animalia	Arthropoda	Insecta	Coleoptera	Elateridae	Ampedus	nigricollis			Herbst, 1801		BOLD:AAH2376	Y		Y	Y	BOLD:AAH2376
366	Animalia	Arthropoda	Insecta	Coleoptera	Elateridae	Ampedus	oblessus			Say, 1833		BOLD:ACA3849	Y		Y	Y	BOLD:ACA3849
367	Animalia	Arthropoda	Insecta	Coleoptera	Elateridae	Ampedus	protervus			LeConte, 1853		BOLD:ACR3975	Y		Y	Y	BOLD:ACR3975
368	Animalia	Arthropoda	Insecta	Coleoptera	Elateridae	Athous	brightwelli			Kirby, 1837			Y	Y
369	Animalia	Arthropoda	Insecta	Coleoptera	Elateridae	Corymbitodes	tarsalis			Melsheimer, 1844		BOLD:ACV5201	Y		Y	Y	BOLD:ACV5201
370	Animalia	Arthropoda	Insecta	Coleoptera	Elateridae	Ctenicera	cylindriformis			Herbst, 1806		BOLD:AAH2370	Y		Y	Y	BOLD:AAH2370
371	Animalia	Arthropoda	Insecta	Coleoptera	Elateridae	Dalopius	vagus			Brown, 1934			Y		Y	Y
372	Animalia	Arthropoda	Insecta	Coleoptera	Elateridae	Hemicrepidius	memnonius			Herbst, 1806			Y	Y
373	Animalia	Arthropoda	Insecta	Coleoptera	Elateridae	Melanotus	castanipes			Paykull, 1800		BOLD:AAH2378	Y		Y	Y	BOLD:AAH2378
374	Animalia	Arthropoda	Insecta	Coleoptera	Endomychidae	Mycetina	perpulchra			Newman, 1838			Y	Y
375	Animalia	Arthropoda	Insecta	Coleoptera	Endomychidae	Phymaphora	pulchella			Newman, 1838		BOLD:ACI7114	Y		Y	Y	BOLD:ACI7114
376	Animalia	Arthropoda	Insecta	Coleoptera	Erotylidae	Triplax	flavicollis			Lacordaire, 1842			Y	Y
377	Animalia	Arthropoda	Insecta	Coleoptera	Erotylidae	Triplax	thoracica			Say, 1825			Y	Y	Y	Y
378	Animalia	Arthropoda	Insecta	Coleoptera	Erotylidae	Tritoma	pulchra			Say, 1826			Y	Y
379	Animalia	Arthropoda	Insecta	Coleoptera	Erotylidae	Tritoma	sanguinipennis			Say, 1825			Y	Y
380	Animalia	Arthropoda	Insecta	Coleoptera	Eucnemidae	Dirrhagofarsus	lewisi			Fleutiaux, 1900			Y	Y
381	Animalia	Arthropoda	Insecta	Coleoptera	Eucnemidae	Hylis	terminalis			LeConte, 1866			Y	Y
382	Animalia	Arthropoda	Insecta	Coleoptera	Eucnemidae	Isorhipis	obliqua			Say, 1836			Y	Y
383	Animalia	Arthropoda	Insecta	Coleoptera	Eucnemidae	Microrhagus	sp.						N	Y
384	Animalia	Arthropoda	Insecta	Coleoptera	Eucnemidae	Microrhagus	subsinuata			LeConte			Y	Y
385	Animalia	Arthropoda	Insecta	Coleoptera	Eucnemidae	Microrhagus	triangularis			Say, 1823			Y	Y
386	Animalia	Arthropoda	Insecta	Coleoptera	Gyrinidae	Dineutus	assimilis			Kirby, 1937			Y		Y	Y
387	Animalia	Arthropoda	Insecta	Coleoptera	Haliplidae	Haliplus	immaculicollis			Harris, 1828			Y		Y	Y
388	Animalia	Arthropoda	Insecta	Coleoptera	Hydrophilidae	Anacaena	lutescens			Stephens, 1829			Y		Y	Y
389	Animalia	Arthropoda	Insecta	Coleoptera	Hydrophilidae	Cercyon	haemorrhoidalis			Fabricius, 1775		BOLD:ABV1545	Y		Y	Y	BOLD:ABV1545
390	Animalia	Arthropoda	Insecta	Coleoptera	Hydrophilidae	Enochrus	ochraceus			Melsheimer, 1844			Y		Y	Y
391	Animalia	Arthropoda	Insecta	Coleoptera	Hydrophilidae	Tropisternus	natator			Orchymont, 1938			Y		Y	Y
392	Animalia	Arthropoda	Insecta	Coleoptera	Kateretidae	Brachypterolus	pulicarius			Linnaeus, 1758			Y	Y	Y	Y
393	Animalia	Arthropoda	Insecta	Coleoptera	Lampyridae	Ellychnia	corrusca			Linnaeus, 1767		BOLD:ACV4844	Y	Y	Y	Y	BOLD:ACV4844
394	Animalia	Arthropoda	Insecta	Coleoptera	Lampyridae	Lucidota	atra			G. Olivier, 1790			Y	Y
395	Animalia	Arthropoda	Insecta	Coleoptera	Lampyridae	Photinus	sp.						N	Y
396	Animalia	Arthropoda	Insecta	Coleoptera	Lampyridae	Pyractomena	sp.						N	Y
397	Animalia	Arthropoda	Insecta	Coleoptera	Lampyridae	Pyropyga	nigricans			Say, 1823			Y	Y
398	Animalia	Arthropoda	Insecta	Coleoptera	Languriidae	Acropteroxys	gracilis			Newman 1838			Y	Y
399	Animalia	Arthropoda	Insecta	Coleoptera	Latridiidae	Cortinicara	gibbosa			Herbst, 1793		BOLD:AAI8935	Y		Y	Y	BOLD:AAI8935
400	Animalia	Arthropoda	Insecta	Coleoptera	Leiodidae	Anisotoma	obsoleta			Horn, 1880		BOLD:AAR3435	Y		Y	Y	BOLD:AAR3435
401	Animalia	Arthropoda	Insecta	Coleoptera	Leiodidae	Anisotoma	sp.						N	Y
402	Animalia	Arthropoda	Insecta	Coleoptera	Leiodidae	Catops	paramericanus			Peck and Cook, 2002		BOLD:AAH3504	Y		Y	Y	BOLD:AAH3504
403	Animalia	Arthropoda	Insecta	Coleoptera	Leiodidae	Catops	sp.						N	Y
404	Animalia	Arthropoda	Insecta	Coleoptera	Leiodidae	Lionothus	sp.						N	Y
405	Animalia	Arthropoda	Insecta	Coleoptera	Leiodidae	Nemadus	sp.						N	Y
406	Animalia	Arthropoda	Insecta	Coleoptera	Leiodidae	Prionochaeta	opaca			Say, 1825		BOLD:AAP6949	Y	Y	Y	Y	BOLD:AAP6949
407	Animalia	Arthropoda	Insecta	Coleoptera	Leiodidae	Ptomophagus	sp.						N	Y
408	Animalia	Arthropoda	Insecta	Coleoptera	Leiodidae	Sciodrepoides	fumatus	terminans		LeConte			Y	Y
409	Animalia	Arthropoda	Insecta	Coleoptera	Melandryidae	Dircaea	liturata			LeConte, 1866			Y	Y
410	Animalia	Arthropoda	Insecta	Coleoptera	Melandryidae	Epicauta	pensylvanica			De Geer, 1775			Y	Y
411	Animalia	Arthropoda	Insecta	Coleoptera	Melandryidae	Melandrya	striata			Say, 1824		BOLD:AAK7242	Y		Y	Y	BOLD:AAK7242
412	Animalia	Arthropoda	Insecta	Coleoptera	Meloidae	Epicauta	murina			LeConte, 1853			Y	Y
413	Animalia	Arthropoda	Insecta	Coleoptera	Meloidae	Meloe	impressus			Kirby, 1837			Y	Y
414	Animalia	Arthropoda	Insecta	Coleoptera	Melyridae	Collops	quadrimaculata			Fabricius, 1798			Y	Y
415	Animalia	Arthropoda	Insecta	Coleoptera	Melyridae	Hypebaeus	apicalis			Say, 1825		BOLD:AAN5932	Y		Y	Y	BOLD:AAN5932
416	Animalia	Arthropoda	Insecta	Coleoptera	Mordellidae	Mordellina	infima			LeConte, 1862			Y	Y
417	Animalia	Arthropoda	Insecta	Coleoptera	Mordellidae	Mordellistena	andreae			LeConte, 1862			Y	Y
418	Animalia	Arthropoda	Insecta	Coleoptera	Mordellidae	Mordellistena	bifasciata			Ray, 1936			Y	Y
419	Animalia	Arthropoda	Insecta	Coleoptera	Mordellidae	Mordellistena	cervicalis			LeConte, 1862			Y	Y
420	Animalia	Arthropoda	Insecta	Coleoptera	Mordellidae	Mordellistena	cf. lutea						N	Y
421	Animalia	Arthropoda	Insecta	Coleoptera	Mordellidae	Mordellistena	ornata			Melsheimer, 1845			Y	Y
422	Animalia	Arthropoda	Insecta	Coleoptera	Mordellidae	Mordellistena	picilabris			Helmuth, 1864			Y	Y
423	Animalia	Arthropoda	Insecta	Coleoptera	Mordellidae	Mordellistena	sp.						N	Y
424	Animalia	Arthropoda	Insecta	Coleoptera	Mordellidae	Mordellochroa	scapularis			Say, 1824		BOLD:AAU6912	Y	Y	Y	Y	BOLD:AAU6912
425	Animalia	Arthropoda	Insecta	Coleoptera	Mordellidae	Paramordellaria	triloba			Say, 1824			Y	Y
426	Animalia	Arthropoda	Insecta	Coleoptera	Mordellidae	Tomoxia	lineela			LeConte			Y	Y
427	Animalia	Arthropoda	Insecta	Coleoptera	Mycetophagidae	Mycetophagus	pluripunctatus			LeConte, 1856			Y		Y	Y
428	Animalia	Arthropoda	Insecta	Coleoptera	Nitidulidae	Carpophilus	sayi			Parsons, 1943			Y	Y
429	Animalia	Arthropoda	Insecta	Coleoptera	Nitidulidae	Conotelus	obscurus			Erichson, 1843			Y	Y
430	Animalia	Arthropoda	Insecta	Coleoptera	Nitidulidae	Glischrochilus	fasciatus			Olivier, 1790			Y	Y	Y	Y
431	Animalia	Arthropoda	Insecta	Coleoptera	Nitidulidae	Glischrochilus	quadrisiginatus			Say 1835			Y	Y
432	Animalia	Arthropoda	Insecta	Coleoptera	Nitidulidae	Glischrochilus	sanguinolentus	sanguinolentus		Olivier, 1790			Y		Y	Y
433	Animalia	Arthropoda	Insecta	Coleoptera	Nitidulidae	Omosita	colon			Linnaeus, 1758			Y	Y
434	Animalia	Arthropoda	Insecta	Coleoptera	Nitidulidae	Stelidota	octomaculata			Say, 1825		BOLD:AAH0115	Y		Y	Y	BOLD:AAH0115
435	Animalia	Arthropoda	Insecta	Coleoptera	Pedilidae	Pedilus	lugubris			Say			Y	Y
436	Animalia	Arthropoda	Insecta	Coleoptera	Phalacridae	Acylomus	pugetanus			Casey, 1916		BOLD:AAH0135	Y		Y	Y	BOLD:AAH0135
437	Animalia	Arthropoda	Insecta	Coleoptera	Phalacridae	Olibrus	semistriatus			LeConte, 1856			Y		Y	Y
438	Animalia	Arthropoda	Insecta	Coleoptera	Phalacridae	Stilbus	apicialis			Melsheimer, 1844		BOLD:AAH0134	Y		Y	Y	BOLD:AAH0134
439	Animalia	Arthropoda	Insecta	Coleoptera	Psephenidae	Psephenus	herricki			DeKay, 1844			Y		Y	Y
440	Animalia	Arthropoda	Insecta	Coleoptera	Ptilodactylidae	Ptilodactyla	sp.						N	Y
441	Animalia	Arthropoda	Insecta	Coleoptera	Ptinidae	Hadrobregmus	notatus			Say, 1825		BOLD:AAP8586	Y		Y	Y	BOLD:AAP8586
442	Animalia	Arthropoda	Insecta	Coleoptera	Pyrochroidae	Dendroides	canadensis			Leconte			Y	Y
443	Animalia	Arthropoda	Insecta	Coleoptera	Pyrochroidae	Schizotus	cervicalis			Newman, 1838			Y	Y
444	Animalia	Arthropoda	Insecta	Coleoptera	Rhipiphoridae	Pelecotoma	flavipes			Melsheimer, 1846			Y	Y
445	Animalia	Arthropoda	Insecta	Coleoptera	Rhipiphoridae	Ripiphorus	fasciatus			Say, 1824			Y	Y	Y	Y
446	Animalia	Arthropoda	Insecta	Coleoptera	Scarabaeidae	Amphimallon	majale			Razumowski, 1789			Y		Y	Y
447	Animalia	Arthropoda	Insecta	Coleoptera	Scarabaeidae	Aphodius	granarius			Linnaeus, 1767			Y		Y	Y
448	Animalia	Arthropoda	Insecta	Coleoptera	Scarabaeidae	Ataenius	strigatus			Say, 1823			Y	Y
449	Animalia	Arthropoda	Insecta	Coleoptera	Scarabaeidae	Calamosternus	granarius			Linnaeus, 1767		BOLD:AAM7733	Y		Y	Y	BOLD:AAM7733
450	Animalia	Arthropoda	Insecta	Coleoptera	Scarabaeidae	Onthophagus	orpheus	canadensis		Fabricius, 1801			Y	Y
451	Animalia	Arthropoda	Insecta	Coleoptera	Scarabaeidae	Osmoderma	scabra			Palisot de Beauvois, 1805			Y	Y
452	Animalia	Arthropoda	Insecta	Coleoptera	Scarabaeidae	Phyllophaga	futilis			LeConte, 1850		BOLD:AAD1098	Y		Y	Y	BOLD:AAD1098
453	Animalia	Arthropoda	Insecta	Coleoptera	Scarabaeidae	Phyllophaga	rugosa			Melsheimer, 1845		BOLD:AAJ2312	Y		Y	Y	BOLD:AAJ2312
454	Animalia	Arthropoda	Insecta	Coleoptera	Scarabaeidae	Popillia	japonica			Newman, 1841			Y	Y	Y	Y
455	Animalia	Arthropoda	Insecta	Coleoptera	Scarabaeidae	Rhyssemus	germanus			Linnaeus, 1767			Y	Y
456	Animalia	Arthropoda	Insecta	Coleoptera	Scarabaeidae	Trox	scabrosus			Beauvois, 1805			Y	Y
457	Animalia	Arthropoda	Insecta	Coleoptera	Scirtidae	Cyphon	laevipennis			Tournier, 1868		BOLD:AAG3633	Y		Y	Y	BOLD:AAG3633
458	Animalia	Arthropoda	Insecta	Coleoptera	Scirtidae	Cyphon	obscurus			Guerin and Memeville, 1834		BOLD:AAG7259	Y		Y	Y	BOLD:AAG7259
459	Animalia	Arthropoda	Insecta	Coleoptera	Scirtidae	Cyphon	pusillus			LeConte		BOLD:AAP7021	Y		Y	Y	BOLD:AAP7021
460	Animalia	Arthropoda	Insecta	Coleoptera	Scirtidae	Scirtes	tibialis			Guerin			Y		Y	Y
461	Animalia	Arthropoda	Insecta	Coleoptera	Scolytidae	Hylurgopinus	rufipes			Eichhoff, 1868			Y	Y
462	Animalia	Arthropoda	Insecta	Coleoptera	Scolytidae	Scolytus	mali			Bechstein, 1805			Y	Y
463	Animalia	Arthropoda	Insecta	Coleoptera	Scolytidae	Xyleborus	sayi			Hopkins, 1915			Y	Y
464	Animalia	Arthropoda	Insecta	Coleoptera	Scraptiidae	Anaspis	rufa			Say, 1826		BOLD:AAH0469	Y	Y	Y	Y	BOLD:AAH0469
465	Animalia	Arthropoda	Insecta	Coleoptera	Scraptiidae	Canifa	pallipes			Melsheimer, 1846			Y	Y
466	Animalia	Arthropoda	Insecta	Coleoptera	Silphidae	Necrophila	americana			Linnaeus, 1758			Y		Y	Y
467	Animalia	Arthropoda	Insecta	Coleoptera	Silphidae	Nicrophorus	orbicollis			Say, 1825		BOLD:AAE1939	Y	Y	Y	Y	BOLD:AAE1939
468	Animalia	Arthropoda	Insecta	Coleoptera	Silphidae	Oiceoptoma	inaequale			Fabricius, 1781			Y	Y
469	Animalia	Arthropoda	Insecta	Coleoptera	Silvanidae	Ahasverus	advena			Waltl, 1834		BOLD:AAJ2005	Y		Y	Y	BOLD:AAJ2005
470	Animalia	Arthropoda	Insecta	Coleoptera	Silvanidae	Silvanus	bidentatus			Fabricius, 1792		BOLD:AAO0157	Y		Y	Y	BOLD:AAO0157
471	Animalia	Arthropoda	Insecta	Coleoptera	Silvanidae	Telephanus	velox			Haldeman, 1846		BOLD:AAW6380	Y		Y	Y	BOLD:AAW6380
472	Animalia	Arthropoda	Insecta	Coleoptera	Staphylinidae	Amischa	analis			Gravenhorst, 1802		BOLD:ABA5313	Y		Y	Y	BOLD:ABA5313
473	Animalia	Arthropoda	Insecta	Coleoptera	Staphylinidae	Anotylus	insecatus			Gravenhorst, 1806		BOLD:AAR3352	Y		Y	Y	BOLD:AAR3352
474	Animalia	Arthropoda	Insecta	Coleoptera	Staphylinidae	Anotylus	tetracarinatus			Block, 1799			Y		Y	Y
475	Animalia	Arthropoda	Insecta	Coleoptera	Staphylinidae	Atheta	brunneipennis			Thomson, 1852		BOLD:ABA9094	Y		Y	Y	BOLD:ABA9094
476	Animalia	Arthropoda	Insecta	Coleoptera	Staphylinidae	Bisnius	blandus			Gravenhorst, 1806			Y		Y	Y
477	Animalia	Arthropoda	Insecta	Coleoptera	Staphylinidae	Carpelimus	fuliginosus			Gravenhorst, 1802		BOLD:AAO0558	Y		Y	Y	BOLD:AAO0558
478	Animalia	Arthropoda	Insecta	Coleoptera	Staphylinidae	Coproporus	ventriculus			Say, 1834		BOLD:ACV1788	Y		Y	Y	BOLD:ACV1788
479	Animalia	Arthropoda	Insecta	Coleoptera	Staphylinidae	Lordithon	appalachianus			Campbell, 1982		BOLD:ABA6331	Y		Y	Y	BOLD:ABA6331
480	Animalia	Arthropoda	Insecta	Coleoptera	Staphylinidae	Lordithon	cinctus			Gravenhorst, 1802		BOLD:ABA6370	Y		Y	Y	BOLD:ABA6370
481	Animalia	Arthropoda	Insecta	Coleoptera	Staphylinidae	Meronera	venustula			Erichson, 1839		BOLD:ABW2870	Y		Y	Y	BOLD:ABW2870
482	Animalia	Arthropoda	Insecta	Coleoptera	Staphylinidae	Myllaena	arcana			Casey, 1911		BOLD:ACJ6804	Y		Y	Y	BOLD:ACJ6804
483	Animalia	Arthropoda	Insecta	Coleoptera	Staphylinidae	Philonthus	caeruleipennis			Mannerheim, 1830			Y		Y	Y
484	Animalia	Arthropoda	Insecta	Coleoptera	Staphylinidae	Philonthus	flavibasis			Casey, 1915		BOLD:AAH0113	Y		Y	Y	BOLD:AAH0113
485	Animalia	Arthropoda	Insecta	Coleoptera	Staphylinidae	Platydracus	cinnamopterus			Gravenhorst, 1802		BOLD:ACJ0017	Y		Y	Y	BOLD:ACJ0017
486	Animalia	Arthropoda	Insecta	Coleoptera	Staphylinidae	Scaphidium	quadriguttatum			Melsheimer		BOLD:ACP0011	Y		Y	Y	BOLD:ACP0011
487	Animalia	Arthropoda	Insecta	Coleoptera	Staphylinidae	Sepedophilus	cinctulus			Erichson, 1839		BOLD:ACC1294	Y		Y	Y	BOLD:ACC1294
488	Animalia	Arthropoda	Insecta	Coleoptera	Staphylinidae	Sepedophilus	testaceus			Fabricius, 1793		BOLD:AAH0108	Y		Y	Y	BOLD:AAH0108
489	Animalia	Arthropoda	Insecta	Coleoptera	Staphylinidae	Stenichnus	scutellaris			Muller & Kunze, 1822		BOLD:AAN9916	Y		Y	Y	BOLD:AAN9916
490	Animalia	Arthropoda	Insecta	Coleoptera	Staphylinidae	Tachinus	corticinus			Gravenhorst, 1802		BOLD:AAH0107	Y		Y	Y	BOLD:AAH0107
491	Animalia	Arthropoda	Insecta	Coleoptera	Staphylinidae	Tachyporus	atriceps			Stephens, 1832		BOLD:ABX2484	Y		Y	Y	BOLD:ABX2484
492	Animalia	Arthropoda	Insecta	Coleoptera	Staphylinidae	Tachyporus	chrysomelinus			Linnaeus, 1758		BOLD:AAN9511	Y		Y	Y	BOLD:AAN9511
493	Animalia	Arthropoda	Insecta	Coleoptera	Staphylinidae	Tachyporus	elegans			Horn, 1877		BOLD:AAU6934	Y		Y	Y	BOLD:AAU6934
494	Animalia	Arthropoda	Insecta	Coleoptera	Staphylinidae	Tachyporus	nitidulus			Fabricius, 1781		BOLD:ABA9096	Y		Y	Y	BOLD:ABA9096
495	Animalia	Arthropoda	Insecta	Coleoptera	Staphylinidae	Trichophya	pilicornis			Gyllenhal, 1810		BOLD:ABW9580	Y		Y	Y	BOLD:ABW9580
496	Animalia	Arthropoda	Insecta	Coleoptera	Staphylinidae	Xantholinus	linearis			Olivier, 1795		BOLD:AAG4333	Y		Y	Y	BOLD:AAG4333
497	Animalia	Arthropoda	Insecta	Coleoptera	Stenotrachelidae	Cephaloon	lepturoides			Newman, 1838			Y		Y	Y
498	Animalia	Arthropoda	Insecta	Coleoptera	Synchroidae	Mallodrya	subaenea			Horn, 1888		BOLD:AAK7440	Y		Y	Y	BOLD:AAK7440
499	Animalia	Arthropoda	Insecta	Coleoptera	Synchroidae	Synchroa	punctata			Newman, 1838			Y	Y
500	Animalia	Arthropoda	Insecta	Coleoptera	Tetratomidae	Eustrophus	tomentosus			Say, 1827		BOLD:ACI7017	Y		Y	Y	BOLD:ACI7017
501	Animalia	Arthropoda	Insecta	Coleoptera	Throscidae	Aulonothroscus	constrictor			Say, 1839		BOLD:AAU7339	Y		Y	Y	BOLD:AAU7339
502	Animalia	Arthropoda	Insecta	Coleoptera	Throscidae	Aulonothroscus	distans			Blanchard, 1917		BOLD:ABA9083	Y		Y	Y	BOLD:ABA9083
503	Animalia	Arthropoda	Insecta	Coleoptera	Throscidae	Aulonothroscus	sp.						N	Y
504	Animalia	Arthropoda	Insecta	Coleoptera	Throscidae	Trixagus	carinicollis			Schaeffer, 1916		BOLD:AAN6148	Y	Y	Y	Y	BOLD:AAN6148
505	Animalia	Arthropoda	Insecta	Coleoptera	Throscidae	Trixagus	chevrolati			Bonvouloir, 1859			Y	Y
506	Animalia	Arthropoda	Insecta	Coleoptera	Trogossitidae	Tenebroides	corticalis			Melsheimer, 1844			Y	Y
507	Animalia	Arthropoda	Insecta	Dermaptera	Forficulidae	Forficula	auricularia			Linnaeus, 1758			Y	Y
508	Animalia	Arthropoda	Insecta	Dermaptera	Forficulidae	Forficula	auricularia-A			Linnaeus, 1758		BOLD:AAG9897	Y		Y	Y	BOLD:AAG9897
509	Animalia	Arthropoda	Insecta	Diptera	Agromyzidae	Agromyza	frontella			Rondani, 1874		BOLD:AAJ7105	Y		Y	Y	BOLD:AAJ7105
510	Animalia	Arthropoda	Insecta	Diptera	Agromyzidae	Aulagromyza	luteoscutellata			de Meijere, 1924		BOLD:AAJ9681	Y		Y	Y	BOLD:AAJ9681
511	Animalia	Arthropoda	Insecta	Diptera	Agromyzidae	Calycomyza	majuscula			Frick, 1956		BOLD:AAV4861	Y		Y	Y	BOLD:AAV4861
512	Animalia	Arthropoda	Insecta	Diptera	Agromyzidae	Cerodontha	biseta			Hendel, 1920			Y		Y	Y
513	Animalia	Arthropoda	Insecta	Diptera	Agromyzidae	Cerodontha	dorsalis			Loew, 1863			Y		Y	Y
514	Animalia	Arthropoda	Insecta	Diptera	Agromyzidae	Cerodontha	fasciata			Strobl, 1880			Y		Y	Y
515	Animalia	Arthropoda	Insecta	Diptera	Agromyzidae	Cerodontha	muscina			Meigen, 1830		BOLD:AAF1051	Y		Y	Y	BOLD:AAF1051
516	Animalia	Arthropoda	Insecta	Diptera	Agromyzidae	Chromatomyia	lactuca			Frost, 1924			Y		Y	Y
517	Animalia	Arthropoda	Insecta	Diptera	Agromyzidae	Japanagromyza	viridula			Coquillett, 1902		BOLD:AAI7960	Y		Y	Y	BOLD:AAI7960
518	Animalia	Arthropoda	Insecta	Diptera	Agromyzidae	Liriomyza	brassicae			Riley, 1885		BOLD:AAF6806	Y		Y	Y	BOLD:AAF6806
519	Animalia	Arthropoda	Insecta	Diptera	Agromyzidae	Liriomyza	fricki			Spencer, 1965		BOLD:ACE7414	Y		Y	Y	BOLD:ACE7414
520	Animalia	Arthropoda	Insecta	Diptera	Agromyzidae	Nemorimyza	posticata			Meigen, 1830		BOLD:AAG9234|BOLD:ACJ0616	Y		Y	Y	BOLD:AAG9234|BOLD:ACJ0616
521	Animalia	Arthropoda	Insecta	Diptera	Agromyzidae	Ophiomyia	labiatarum			Hering, 1937			Y		Y	Y
522	Animalia	Arthropoda	Insecta	Diptera	Agromyzidae	Ophiomyia	nasuta			Melander, 1913		BOLD:AAK5607	Y		Y	Y	BOLD:AAK5607
523	Animalia	Arthropoda	Insecta	Diptera	Agromyzidae	Ophiomyia	quinta			Spencer, 1969		BOLD:AAI3360|BOLD:ABZ1036	Y		Y	Y	BOLD:AAI3360|BOLD:ABZ1036
524	Animalia	Arthropoda	Insecta	Diptera	Agromyzidae	Ophiomyia	similata			Malloch, 1918		BOLD:AAP8823|BOLD:ACV3095|BOLD:ACV5944	Y		Y	Y	BOLD:AAP8823|BOLD:ACV3095|BOLD:ACV5944
525	Animalia	Arthropoda	Insecta	Diptera	Agromyzidae	Phytoliriomyza	dorsata			Siebke, 1864		BOLD:AAG4751	Y		Y	Y	BOLD:AAG4751
526	Animalia	Arthropoda	Insecta	Diptera	Agromyzidae	Phytoliriomyza	robiniae			Valley, 1982		BOLD:AAY1337	Y		Y	Y	BOLD:AAY1337
527	Animalia	Arthropoda	Insecta	Diptera	Agromyzidae	Phytomyza	flavicornis			Fallen, 1823		BOLD:AAH9376	Y		Y	Y	BOLD:AAH9376
528	Animalia	Arthropoda	Insecta	Diptera	Agromyzidae	Phytomyza	solidaginophaga			Sehgal, 1971		BOLD:AAL4176	Y		Y	Y	BOLD:AAL4176
529	Animalia	Arthropoda	Insecta	Diptera	Agromyzidae	Pseudonapomyza	europaea			Spencer, 1973			Y		Y	Y
530	Animalia	Arthropoda	Insecta	Diptera	Anisopodidae	Sylvicola	alternatus			Say, 1823		BOLD:AAG2000	Y		Y	Y	BOLD:AAG2000
531	Animalia	Arthropoda	Insecta	Diptera	Anisopodidae	Sylvicola	fuscatus			Fabricius, 1775		BOLD:AAG1998	Y		Y	Y	BOLD:AAG1998
532	Animalia	Arthropoda	Insecta	Diptera	Anthomyiidae	Anthomyia	pluvialis			Linnaeus, 1758		BOLD:AAP2970	Y		Y	Y	BOLD:AAP2970
533	Animalia	Arthropoda	Insecta	Diptera	Anthomyiidae	Delia	antiqua			Meigen, 1826			Y		Y	Y
534	Animalia	Arthropoda	Insecta	Diptera	Anthomyiidae	Delia	platura			Meigen, 1826		BOLD:AAA3453	Y		Y	Y	BOLD:AAA3453
535	Animalia	Arthropoda	Insecta	Diptera	Anthomyiidae	Eustalomyia	festiva			Zetterstedt, 1845		BOLD:AAP8833	Y		Y	Y	BOLD:AAP8833
536	Animalia	Arthropoda	Insecta	Diptera	Anthomyiidae	Eutrichota	pilimana			Ringdahl, 1918		BOLD:AAP2968	Y		Y	Y	BOLD:AAP2968
537	Animalia	Arthropoda	Insecta	Diptera	Anthomyiidae	Hylemyza	partita			Meigen, 1826		BOLD:AAG2463	Y		Y	Y	BOLD:AAG2463
538	Animalia	Arthropoda	Insecta	Diptera	Anthomyiidae	Pegomya	flavifrons			Walker, 1849		BOLD:AAG2479	Y		Y	Y	BOLD:AAG2479
539	Animalia	Arthropoda	Insecta	Diptera	Anthomyzidae	Mumetopia	occipitalis			Melander, 1913		BOLD:AAG4827	Y		Y	Y	BOLD:AAG4827
540	Animalia	Arthropoda	Insecta	Diptera	Anthomyzidae	Stiphrosoma	balteatum			Rohacek & Barber, 2005			Y		Y	Y
541	Animalia	Arthropoda	Insecta	Diptera	Asilidae	Dioctria	baumhaueri			Meigen, 1820			Y	Y
542	Animalia	Arthropoda	Insecta	Diptera	Asilidae	Efferia	aestuans			Linnaeus, 1763			Y	Y	Y	Y
543	Animalia	Arthropoda	Insecta	Diptera	Asilidae	Efferia	albibarbis			Macquart, 1838			Y	Y
544	Animalia	Arthropoda	Insecta	Diptera	Asilidae	Laphria	canis			Williston, 1883			Y	Y
545	Animalia	Arthropoda	Insecta	Diptera	Asilidae	Laphria	canis complex			Williston, 1883			N	Y
546	Animalia	Arthropoda	Insecta	Diptera	Asilidae	Laphria	cinerea			Back, 1904			Y	Y
547	Animalia	Arthropoda	Insecta	Diptera	Asilidae	Laphria	flavicollis			Say, 1824			Y	Y
548	Animalia	Arthropoda	Insecta	Diptera	Asilidae	Laphria	janus			McAtee, 1919			Y	Y
549	Animalia	Arthropoda	Insecta	Diptera	Asilidae	Laphria	sicula			McAtee, 1919			Y	Y
550	Animalia	Arthropoda	Insecta	Diptera	Asilidae	Laphria	thoracica			Fabricius, 1805			Y	Y	Y	Y
551	Animalia	Arthropoda	Insecta	Diptera	Asilidae	Machimus	sadyates			Walker, 1849			Y	Y
552	Animalia	Arthropoda	Insecta	Diptera	Aulacigastridae	Aulacigaster	neoleucopeza			Mathis & Freidberg, 1994		BOLD:AAV0437|BOLD:ABV3853	Y		Y	Y	BOLD:AAV0437|BOLD:ABV3853
553	Animalia	Arthropoda	Insecta	Diptera	Bombyliidae	Anthrax	irroratus			Say, 1823			Y	Y
554	Animalia	Arthropoda	Insecta	Diptera	Bombyliidae	Bombylius	major			Linnaeus, 1758		BOLD:ABV0388	Y		Y	Y	BOLD:ABV0388
555	Animalia	Arthropoda	Insecta	Diptera	Bombyliidae	Hemipenthes	morio			Linnaeus, 1758			Y	Y
556	Animalia	Arthropoda	Insecta	Diptera	Bombyliidae	Hemipenthes	sinuosa			Wiedemann, 1821			Y	Y
557	Animalia	Arthropoda	Insecta	Diptera	Bombyliidae	Hemipenthes	webberi			Johnson, 1919			Y	Y
558	Animalia	Arthropoda	Insecta	Diptera	Bombyliidae	Xenox	tigrinus			De Geer, 1776			Y	Y
559	Animalia	Arthropoda	Insecta	Diptera	Calliphoridae	Calliphora	livida			Hall, 1948		BOLD:ABY7153	Y		Y	Y	BOLD:ABY7153
560	Animalia	Arthropoda	Insecta	Diptera	Calliphoridae	Cynomya	cadaverina			Robineau-Desvoidy, 1830		BOLD:AAB0868	Y		Y	Y	BOLD:AAB0868
561	Animalia	Arthropoda	Insecta	Diptera	Calliphoridae	Phormia	regina			Meigen, 1826		BOLD:AAB9140	Y		Y	Y	BOLD:AAB9140
562	Animalia	Arthropoda	Insecta	Diptera	Calliphoridae	Pollenia	angustigena			Wainwright, 1940		BOLD:AAP2825	Y		Y	Y	BOLD:AAP2825
563	Animalia	Arthropoda	Insecta	Diptera	Calliphoridae	Pollenia	griseotomentosa			Jacentkovsky, 1944		BOLD:AAI2766	Y		Y	Y	BOLD:AAI2766
564	Animalia	Arthropoda	Insecta	Diptera	Calliphoridae	Pollenia	labialis			Robineau-Desvoidy, 1863		BOLD:AAI2765	Y		Y	Y	BOLD:AAI2765
565	Animalia	Arthropoda	Insecta	Diptera	Calliphoridae	Pollenia	pediculata			Macquart, 1834		BOLD:AAG6745	Y		Y	Y	BOLD:AAG6745
566	Animalia	Arthropoda	Insecta	Diptera	Calliphoridae	Pollenia	rudis			Fabricius, 1794		BOLD:AAH3035	Y		Y	Y	BOLD:AAH3035
567	Animalia	Arthropoda	Insecta	Diptera	Cecidomyiidae	Asteromyia	carbonifera			Osten Sacken, 1862		BOLD:AAA2254|BOLD:ABX5689	Y		Y	Y	BOLD:AAA2254|BOLD:ABX5689
568	Animalia	Arthropoda	Insecta	Diptera	Cecidomyiidae	Asteromyia	laeviana			Felt, 1907		BOLD:ABV1420	Y		Y	Y	BOLD:ABV1420
569	Animalia	Arthropoda	Insecta	Diptera	Cecidomyiidae	Asteromyia	modesta			Felt, 1907		BOLD:AAM1947|BOLD:AAM1948|BOLD:AAM1954|BOLD:ACG8775|BOLD:ACN2213	Y		Y	Y	BOLD:AAM1947|BOLD:AAM1948|BOLD:AAM1954|BOLD:ACG8775|BOLD:ACN2213
570	Animalia	Arthropoda	Insecta	Diptera	Cecidomyiidae	Asteromyia	tumifica			Beutenmuller, 1907		BOLD:ACL0470	Y		Y	Y	BOLD:ACL0470
571	Animalia	Arthropoda	Insecta	Diptera	Cecidomyiidae	Janetiella	glechomae			Tavares, 1930		BOLD:AAQ0642	Y		Y	Y	BOLD:AAQ0642
572	Animalia	Arthropoda	Insecta	Diptera	Cecidomyiidae	Mayetiola	destructor			Say, 1817		BOLD:ABV9277	Y		Y	Y	BOLD:ABV9277
573	Animalia	Arthropoda	Insecta	Diptera	Ceratopogonidae	Stilobezzia	antennalis			Coquillett, 1901			Y		Y	Y
574	Animalia	Arthropoda	Insecta	Diptera	Chironomidae	Bryophaenocladius	ictericus			Meigen, 1830		BOLD:AAM6273	Y		Y	Y	BOLD:AAM6273
575	Animalia	Arthropoda	Insecta	Diptera	Chironomidae	Bryophaenocladius	sp. 8ES					BOLD:AAG1021	N		Y	Y	BOLD:AAG1021
576	Animalia	Arthropoda	Insecta	Diptera	Chironomidae	Camptocladius	stercorarius			De Geer, 1776		BOLD:AAN5341	Y		Y	Y	BOLD:AAN5341
577	Animalia	Arthropoda	Insecta	Diptera	Chironomidae	Chironomus	acidophilus			Keyl, 1960		BOLD:AAJ4295	Y		Y	Y	BOLD:AAJ4295
578	Animalia	Arthropoda	Insecta	Diptera	Chironomidae	Chironomus	dilutus			Kiknadze & Butler, 1999		BOLD:AAB4658	Y		Y	Y	BOLD:AAB4658
579	Animalia	Arthropoda	Insecta	Diptera	Chironomidae	Chironomus	maturus			Johannsen, 1908		BOLD:AAB4657	Y		Y	Y	BOLD:AAB4657
580	Animalia	Arthropoda	Insecta	Diptera	Chironomidae	Chironomus	melanescens			Keyl, 1961		BOLD:AAI4303	Y		Y	Y	BOLD:AAI4303
581	Animalia	Arthropoda	Insecta	Diptera	Chironomidae	Chironomus	ochreatus			Townes, 1945		BOLD:ACV5571	Y		Y	Y	BOLD:ACV5571
582	Animalia	Arthropoda	Insecta	Diptera	Chironomidae	Cladotanytarsus	atridorsum			Kieffer, 1924		BOLD:AAJ3263	Y		Y	Y	BOLD:AAJ3263
583	Animalia	Arthropoda	Insecta	Diptera	Chironomidae	Conchapelopia	telema			Roback, 1971		BOLD:AAC4802|BOLD:AAN5351	Y		Y	Y	BOLD:AAC4802|BOLD:AAN5351
584	Animalia	Arthropoda	Insecta	Diptera	Chironomidae	Corynoneura	scutellata			Winnertz, 1846		BOLD:AAN5330	Y		Y	Y	BOLD:AAN5330
585	Animalia	Arthropoda	Insecta	Diptera	Chironomidae	Cricotopus	annulator cmplx			Goetghebuer, 1927			N		Y	Y
586	Animalia	Arthropoda	Insecta	Diptera	Chironomidae	Cricotopus	bicinctus			Meigen, 1818		BOLD:ACC7282	Y		Y	Y	BOLD:ACC7282
587	Animalia	Arthropoda	Insecta	Diptera	Chironomidae	Cricotopus	sp. 18ES						N		Y	Y
588	Animalia	Arthropoda	Insecta	Diptera	Chironomidae	Cricotopus	sp. 19ES					BOLD:AAP5141	N		Y	Y	BOLD:AAP5141
589	Animalia	Arthropoda	Insecta	Diptera	Chironomidae	Cricotopus	tremulus			Linnaeus, 1758		BOLD:AAE4298	Y		Y	Y	BOLD:AAE4298
590	Animalia	Arthropoda	Insecta	Diptera	Chironomidae	Cricotopus	triannulatus			Macquart, 1826		BOLD:AAP5920	Y		Y	Y	BOLD:AAP5920
591	Animalia	Arthropoda	Insecta	Diptera	Chironomidae	Cricotopus	trifascia			Edwards, 1929		BOLD:ACS9429|BOLD:ACT0257	Y		Y	Y	BOLD:ACS9429|BOLD:ACT0257
592	Animalia	Arthropoda	Insecta	Diptera	Chironomidae	Cricotopus	vierriensis			Goetghebuer, 1935		BOLD:AAG1005|BOLD:ACV5403|BOLD:ACV5404	Y		Y	Y	BOLD:AAG1005|BOLD:ACV5403|BOLD:ACV5404
593	Animalia	Arthropoda	Insecta	Diptera	Chironomidae	Dicrotendipes	modestus			Say, 1823		BOLD:AAL7329	Y		Y	Y	BOLD:AAL7329
594	Animalia	Arthropoda	Insecta	Diptera	Chironomidae	Dicrotendipes	tritomus			Kieffer, 1916		BOLD:AAC0706	Y		Y	Y	BOLD:AAC0706
595	Animalia	Arthropoda	Insecta	Diptera	Chironomidae	Gymnometriocnemus	brumalis			Edwards, 1929		BOLD:AAP6873	Y		Y	Y	BOLD:AAP6873
596	Animalia	Arthropoda	Insecta	Diptera	Chironomidae	Lauterborniella	agrayloides			Kieffer, 1911		BOLD:AAN5343	Y		Y	Y	BOLD:AAN5343
597	Animalia	Arthropoda	Insecta	Diptera	Chironomidae	Limnophyes	natalensis			Kieffer, 1914		BOLD:AAB7361	Y		Y	Y	BOLD:AAB7361
598	Animalia	Arthropoda	Insecta	Diptera	Chironomidae	Limnophyes	sp. 14ES					BOLD:ABU5525	N		Y	Y	BOLD:ABU5525
599	Animalia	Arthropoda	Insecta	Diptera	Chironomidae	Metriocnemus	sp. 4ES					BOLD:ABX5809	N		Y	Y	BOLD:ABX5809
600	Animalia	Arthropoda	Insecta	Diptera	Chironomidae	Micropsectra	nigripila			Johannsen, 1905			Y		Y	Y
601	Animalia	Arthropoda	Insecta	Diptera	Chironomidae	Micropsectra	subletteorum			Anderson, Stur & Ekrem, 2013		BOLD:AAF7088	Y		Y	Y	BOLD:AAF7088
602	Animalia	Arthropoda	Insecta	Diptera	Chironomidae	Microtendipes	pedellus			De Geer, 1776		BOLD:AAE0707	Y		Y	Y	BOLD:AAE0707
603	Animalia	Arthropoda	Insecta	Diptera	Chironomidae	Monopelopia	tenuicalcar			Kieffer, 1918		BOLD:AAM6277	Y		Y	Y	BOLD:AAM6277
604	Animalia	Arthropoda	Insecta	Diptera	Chironomidae	Nanocladius	anderseni			Saether, 1977		BOLD:AAC3041	Y		Y	Y	BOLD:AAC3041
605	Animalia	Arthropoda	Insecta	Diptera	Chironomidae	Nilotanypus	fimbriatus			Walker, 1828		BOLD:AAE5762	Y		Y	Y	BOLD:AAE5762
606	Animalia	Arthropoda	Insecta	Diptera	Chironomidae	Orthocladius	carlatus			Roback, 1957		BOLD:AAG1000	Y		Y	Y	BOLD:AAG1000
607	Animalia	Arthropoda	Insecta	Diptera	Chironomidae	Orthocladius	dorenus			Roback, 1957		BOLD:AAB2641|BOLD:AAB2645|BOLD:ACV3368	Y		Y	Y	BOLD:AAB2641|BOLD:AAB2645|BOLD:ACV3368
608	Animalia	Arthropoda	Insecta	Diptera	Chironomidae	Orthocladius	oliveri			Soponis, 1977		BOLD:AAB7872	Y		Y	Y	BOLD:AAB7872
609	Animalia	Arthropoda	Insecta	Diptera	Chironomidae	Orthocladius	rivulorum			Kieffer, 1909		BOLD:AAB3988	Y		Y	Y	BOLD:AAB3988
610	Animalia	Arthropoda	Insecta	Diptera	Chironomidae	Pagastia	orthogonia			Oliver, 1959		BOLD:AAI2601	Y		Y	Y	BOLD:AAI2601
611	Animalia	Arthropoda	Insecta	Diptera	Chironomidae	Paraphaenocladius	impensus			Walker, 1856		BOLD:AAC4197	Y		Y	Y	BOLD:AAC4197
612	Animalia	Arthropoda	Insecta	Diptera	Chironomidae	Paratanytarsus	dissimilis			Johannsen, 1905		BOLD:AAE3698	Y		Y	Y	BOLD:AAE3698
613	Animalia	Arthropoda	Insecta	Diptera	Chironomidae	Paratanytarsus	grimmii			Schneider, 1885		BOLD:AAD1485	Y		Y	Y	BOLD:AAD1485
614	Animalia	Arthropoda	Insecta	Diptera	Chironomidae	Paratanytarsus	laccophilus			Edwards, 1929		BOLD:AAC8842|BOLD:ACF2457	Y		Y	Y	BOLD:AAC8842|BOLD:ACF2457
615	Animalia	Arthropoda	Insecta	Diptera	Chironomidae	Paratanytarsus	sp. 7TE					BOLD:AAP2907	N		Y	Y	BOLD:AAP2907
616	Animalia	Arthropoda	Insecta	Diptera	Chironomidae	Paratanytarsus	sp. TE03					BOLD:AAE3675	N		Y	Y	BOLD:AAE3675
617	Animalia	Arthropoda	Insecta	Diptera	Chironomidae	Polypedilum	convictum			Walker, 1856		BOLD:AAD1397	Y		Y	Y	BOLD:AAD1397
618	Animalia	Arthropoda	Insecta	Diptera	Chironomidae	Psectrocladius	obvius			Walker, 1856		BOLD:AAF6432	Y		Y	Y	BOLD:AAF6432
619	Animalia	Arthropoda	Insecta	Diptera	Chironomidae	Rheocricotopus	robacki			Beck and Beck, 1964		BOLD:AAM6249	Y		Y	Y	BOLD:AAM6249
620	Animalia	Arthropoda	Insecta	Diptera	Chironomidae	Rheotanytarsus	pellucidus			Walker, 1848		BOLD:AAI0332	Y		Y	Y	BOLD:AAI0332
621	Animalia	Arthropoda	Insecta	Diptera	Chironomidae	Smittia	edwardsi			Goetghebuer, 1932		BOLD:AAF4817	Y		Y	Y	BOLD:AAF4817
622	Animalia	Arthropoda	Insecta	Diptera	Chironomidae	Smittia	sp. 14ES					BOLD:AAM7064	N		Y	Y	BOLD:AAM7064
623	Animalia	Arthropoda	Insecta	Diptera	Chironomidae	Smittia	sp. 22ES					BOLD:AAN5358	N		Y	Y	BOLD:AAN5358
624	Animalia	Arthropoda	Insecta	Diptera	Chironomidae	Smittia	sp. 23ES					BOLD:AAH9641	N		Y	Y	BOLD:AAH9641
625	Animalia	Arthropoda	Insecta	Diptera	Chironomidae	Smittia	sp. 8ES					BOLD:ACP4736	N		Y	Y	BOLD:ACP4736
626	Animalia	Arthropoda	Insecta	Diptera	Chironomidae	Stempellinella	fimbriata			Ekrem, 2007		BOLD:AAD0300	Y		Y	Y	BOLD:AAD0300
627	Animalia	Arthropoda	Insecta	Diptera	Chironomidae	Tanytarsus	glabrescens			Edwards, 1929		BOLD:ACV5604|BOLD:ACV5898	Y		Y	Y	BOLD:ACV5604|BOLD:ACV5898
628	Animalia	Arthropoda	Insecta	Diptera	Chironomidae	Tanytarsus	guerlus			Roback, 1957		BOLD:AAC4523|BOLD:AAC4525	Y		Y	Y	BOLD:AAC4523|BOLD:AAC4525
629	Animalia	Arthropoda	Insecta	Diptera	Chironomidae	Tanytarsus	mendax			Kieffer, 1925		BOLD:ACJ3722|BOLD:ACV3832	Y		Y	Y	BOLD:ACJ3722|BOLD:ACV3832
630	Animalia	Arthropoda	Insecta	Diptera	Chironomidae	Tanytarsus	recurvatus			Brundin, 1947		BOLD:AAC3354	Y		Y	Y	BOLD:AAC3354
631	Animalia	Arthropoda	Insecta	Diptera	Chironomidae	Tanytarsus	wirthi			Ekrem, Sublette & Sublette, 2003		BOLD:AAD2144	Y		Y	Y	BOLD:AAD2144
632	Animalia	Arthropoda	Insecta	Diptera	Chironomidae	Thienemanniella	xena			Roback, 1957		BOLD:AAD5253|BOLD:AAD5254	Y		Y	Y	BOLD:AAD5253|BOLD:AAD5254
633	Animalia	Arthropoda	Insecta	Diptera	Chloropidae	Chaetochlorops	inquilinus			Coquillett, 1898			Y	Y
634	Animalia	Arthropoda	Insecta	Diptera	Chloropidae	Elachiptera	costata			Loew, 1863			Y	Y
635	Animalia	Arthropoda	Insecta	Diptera	Chloropidae	Elachiptera	nigriceps			Loew, 1863		BOLD:AAP5169	Y	Y	Y	Y	BOLD:AAP5169
636	Animalia	Arthropoda	Insecta	Diptera	Chloropidae	Elachiptera	sibirica			Loew, 1858		BOLD:AAH4208	Y		Y	Y	BOLD:AAH4208
637	Animalia	Arthropoda	Insecta	Diptera	Chloropidae	Eribolus	longulus			Loew, 1863			Y	Y
638	Animalia	Arthropoda	Insecta	Diptera	Chloropidae	Gaurax	dubius			Macquart, 1835		BOLD:ACC7744	Y		Y	Y	BOLD:ACC7744
639	Animalia	Arthropoda	Insecta	Diptera	Chloropidae	Gaurax	pallidipes			Malloch, 1915		BOLD:AAH4210	Y		Y	Y	BOLD:AAH4210
640	Animalia	Arthropoda	Insecta	Diptera	Chloropidae	Gaurax	varihalteratus			Malloch, 1913		BOLD:ACM2340	Y		Y	Y	BOLD:ACM2340
641	Animalia	Arthropoda	Insecta	Diptera	Chloropidae	Hapleginella	conicola			Greene, 1918			Y		Y	Y
642	Animalia	Arthropoda	Insecta	Diptera	Chloropidae	Malloewia	abdominalis			Becker, 1912		BOLD:ABW1379	Y		Y	Y	BOLD:ABW1379
643	Animalia	Arthropoda	Insecta	Diptera	Chloropidae	Malloewia	nigripalpis			Malloch, 1913		BOLD:ABZ4644	Y		Y	Y	BOLD:ABZ4644
644	Animalia	Arthropoda	Insecta	Diptera	Chloropidae	Olcella	provocans			Becker, 1912			Y		Y	Y
645	Animalia	Arthropoda	Insecta	Diptera	Chloropidae	Oscinella	frit			Linnaeus, 1758			Y		Y	Y
646	Animalia	Arthropoda	Insecta	Diptera	Chloropidae	Oscinisoma	alienum			Becker, 1912		BOLD:ACE3223	Y		Y	Y	BOLD:ACE3223
647	Animalia	Arthropoda	Insecta	Diptera	Chloropidae	Psilacrum	arpidia			Malloch, 1916		BOLD:ACE0829	Y		Y	Y	BOLD:ACE0829
648	Animalia	Arthropoda	Insecta	Diptera	Chloropidae	Rhopalopterum	carbonarium			Loew, 1869			Y		Y	Y
649	Animalia	Arthropoda	Insecta	Diptera	Chloropidae	Thaumatomyia	glabra			Meigen, 1830		BOLD:AAH4135	Y	Y	Y	Y	BOLD:AAH4135
650	Animalia	Arthropoda	Insecta	Diptera	Chyromyidae	Gymnochiromyia	concolor			Malloch, 1914		BOLD:ACV5890	Y		Y	Y	BOLD:ACV5890
651	Animalia	Arthropoda	Insecta	Diptera	Clusiidae	Clusia	czernyi			Johnson, 1913		BOLD:AAF4394	Y		Y	Y	BOLD:AAF4394
652	Animalia	Arthropoda	Insecta	Diptera	Clusiidae	Clusia	lateralis			Walker, 1849			Y	Y
653	Animalia	Arthropoda	Insecta	Diptera	Clusiidae	Clusiodes	johnsoni			Malloch, 1922		BOLD:AAJ4032	Y	Y	Y	Y	BOLD:AAJ4032
654	Animalia	Arthropoda	Insecta	Diptera	Clusiidae	Clusiodes	melanostomus			Loew, 1864		BOLD:AAJ4031	Y		Y	Y	BOLD:AAJ4031
655	Animalia	Arthropoda	Insecta	Diptera	Clusiidae	Sobarocephala	flaviseta			Johnson, 1913		BOLD:AAN5648	Y		Y	Y	BOLD:AAN5648
656	Animalia	Arthropoda	Insecta	Diptera	Clusiidae	Sobarocephala	setipes			Melander and Argo, 1924			Y	Y
657	Animalia	Arthropoda	Insecta	Diptera	Conopidae	Physocephala	marginata			Say, 1823			Y	Y
658	Animalia	Arthropoda	Insecta	Diptera	Culicidae	Aedes	canadensis			Theobald			Y	Y
659	Animalia	Arthropoda	Insecta	Diptera	Culicidae	Aedes	cinereus			Meigen, 1818		BOLD:AAC1222	Y		Y	Y	BOLD:AAC1222
660	Animalia	Arthropoda	Insecta	Diptera	Culicidae	Aedes	sp.						N	Y
661	Animalia	Arthropoda	Insecta	Diptera	Culicidae	Aedes	stimulans			(Walker, 1848)			Y		Y	Y
662	Animalia	Arthropoda	Insecta	Diptera	Culicidae	Aedes	vexans			Meigen, 1830		BOLD:AAA7067	Y		Y	Y	BOLD:AAA7067
663	Animalia	Arthropoda	Insecta	Diptera	Culicidae	Anopheles	quadrimaculatus			Say, 1824			Y		Y	Y
664	Animalia	Arthropoda	Insecta	Diptera	Culicidae	Coquillettidia	perturbans			Walker, 1856		BOLD:AAB2539	Y		Y	Y	BOLD:AAB2539
665	Animalia	Arthropoda	Insecta	Diptera	Culicidae	Culex	restuans			Theobald, 1901		BOLD:AAA7661	Y		Y	Y	BOLD:AAA7661
666	Animalia	Arthropoda	Insecta	Diptera	Culicidae	Culex	territans			Walker, 1856		BOLD:AAB6943|BOLD:ABY7666	Y		Y	Y	BOLD:AAB6943|BOLD:ABY7666
667	Animalia	Arthropoda	Insecta	Diptera	Culicidae	Mansonia	perturbans			Walker			Y	Y
668	Animalia	Arthropoda	Insecta	Diptera	Dolichopodidae	Dolichopus	orichalceus			Gosseries, 1989			Y		Y	Y
669	Animalia	Arthropoda	Insecta	Diptera	Dolichopodidae	Dolichopus	terminalis			Loew, 1866			Y		Y	Y
670	Animalia	Arthropoda	Insecta	Diptera	Dolichopodidae	Gymnopternus	celer			Meigen, 1824			Y		Y	Y
671	Animalia	Arthropoda	Insecta	Diptera	Dolichopodidae	Medetera	signaticornis			Loew, 1857		BOLD:AAZ3931	Y		Y	Y	BOLD:AAZ3931
672	Animalia	Arthropoda	Insecta	Diptera	Dolichopodidae	Neurigona	disjuncta			Van Duzee, 1913		BOLD:ABW1193	Y		Y	Y	BOLD:ABW1193
673	Animalia	Arthropoda	Insecta	Diptera	Dolichopodidae	Xanthochlorus	helvinus			Loew, 1861			Y		Y	Y
674	Animalia	Arthropoda	Insecta	Diptera	Drosophilidae	Chymomyza	amoena			Loew, 1862		BOLD:AAE2703	Y		Y	Y	BOLD:AAE2703
675	Animalia	Arthropoda	Insecta	Diptera	Drosophilidae	Drosophila	affinis			Sturtevant, 1916		BOLD:AAB8851	Y		Y	Y	BOLD:AAB8851
676	Animalia	Arthropoda	Insecta	Diptera	Drosophilidae	Drosophila	falleni			Wheeler, 1960		BOLD:AAB7507	Y		Y	Y	BOLD:AAB7507
677	Animalia	Arthropoda	Insecta	Diptera	Drosophilidae	Leucophenga	varia			Walker, 1849		BOLD:AAG8500	Y		Y	Y	BOLD:AAG8500
678	Animalia	Arthropoda	Insecta	Diptera	Drosophilidae	Scaptomyza	adusta			Loew, 1862		BOLD:AAG8491	Y		Y	Y	BOLD:AAG8491
679	Animalia	Arthropoda	Insecta	Diptera	Empididae	Rhamphomyia	versicolor			Chillcott, 1959		BOLD:AAM7337	Y		Y	Y	BOLD:AAM7337
680	Animalia	Arthropoda	Insecta	Diptera	Ephydridae	Athyroglossa	dinorata			Mathis & Zatwarnicki, 1990			Y	Y
681	Animalia	Arthropoda	Insecta	Diptera	Ephydridae	Athyroglossa	granulosa			Cresson, 1922		BOLD:ABY0801	Y	Y	Y	Y	BOLD:ABY0801
682	Animalia	Arthropoda	Insecta	Diptera	Ephydridae	Axysta	extera			Cresson, 1942			Y	Y
683	Animalia	Arthropoda	Insecta	Diptera	Ephydridae	Coenia	curvicauda			Meigen, 1830			Y	Y
684	Animalia	Arthropoda	Insecta	Diptera	Ephydridae	Discocerina	obscurella			Fallen, 1813			Y	Y
685	Animalia	Arthropoda	Insecta	Diptera	Ephydridae	Discomyza	incurva			Fallen 1823		BOLD:ABA8754	Y		Y	Y	BOLD:ABA8754
686	Animalia	Arthropoda	Insecta	Diptera	Ephydridae	Hyadina	albovenosa			Coquillett, 1900			Y	Y	Y	Y
687	Animalia	Arthropoda	Insecta	Diptera	Ephydridae	Hydrellia	albilabris			Meigen, 1830			Y		Y	Y
688	Animalia	Arthropoda	Insecta	Diptera	Ephydridae	Hydrellia	griseola			Fallen, 1813			Y	Y
689	Animalia	Arthropoda	Insecta	Diptera	Ephydridae	Hydrellia	ischiaca			Loew, 1862			Y	Y
690	Animalia	Arthropoda	Insecta	Diptera	Ephydridae	Hydrellia	notata			Deonier, 1971			Y		Y	Y
691	Animalia	Arthropoda	Insecta	Diptera	Ephydridae	Nostima	scutellaris			Cresson, 1933			Y	Y
692	Animalia	Arthropoda	Insecta	Diptera	Ephydridae	Ochthera	anatolikos			Clausen, 1977			Y	Y
693	Animalia	Arthropoda	Insecta	Diptera	Ephydridae	Parydra	aquila			Fallen, 1813			Y	Y
694	Animalia	Arthropoda	Insecta	Diptera	Ephydridae	Philygria	debilis			Loew, 1861			Y	Y
695	Animalia	Arthropoda	Insecta	Diptera	Ephydridae	Philygria	obtecta			Becker, 1896		BOLD:AAG2740	Y		Y	Y	BOLD:AAG2740
696	Animalia	Arthropoda	Insecta	Diptera	Ephydridae	Pseudohyadina	longicornis			Sturtevant and Wheeler, 1954			Y	Y
697	Animalia	Arthropoda	Insecta	Diptera	Ephydridae	Scatella	favillacea			Loew, 1862			Y	Y
698	Animalia	Arthropoda	Insecta	Diptera	Ephydridae	Scatella	stagnalis			Fallen, 1813			Y	Y
699	Animalia	Arthropoda	Insecta	Diptera	Ephydridae	Scatella	tenuicosta			Collin, 1930			Y		Y	Y
700	Animalia	Arthropoda	Insecta	Diptera	Ephydridae	Scatophila	despecta			Haliday, 1839			Y	Y
701	Animalia	Arthropoda	Insecta	Diptera	Ephydridae	Scatophila	virildella			Sturtevant & Wheeler, 1954			Y	Y
702	Animalia	Arthropoda	Insecta	Diptera	Fanniidae	Fannia	armata			Meigen, 1826		BOLD:AAU6630	Y		Y	Y	BOLD:AAU6630
703	Animalia	Arthropoda	Insecta	Diptera	Heleomyzidae	Suillia	quinquepunctata			Say, 1823		BOLD:AAC8595	Y		Y	Y	BOLD:AAC8595
704	Animalia	Arthropoda	Insecta	Diptera	Hybotidae	Leptopeza	flavipes			Meigen, 1820		BOLD:ACE5974	Y		Y	Y	BOLD:ACE5974
705	Animalia	Arthropoda	Insecta	Diptera	Hybotidae	Platypalpus	annulatus			Fallen, 1815			Y		Y	Y
706	Animalia	Arthropoda	Insecta	Diptera	Hybotidae	Platypalpus	holosericus			Melander, 1924		BOLD:AAP6357	Y		Y	Y	BOLD:AAP6357
707	Animalia	Arthropoda	Insecta	Diptera	Hybotidae	Platypalpus	melleus			Melander, 1927		BOLD:AAV3697	Y		Y	Y	BOLD:AAV3697
708	Animalia	Arthropoda	Insecta	Diptera	Hybotidae	Platypalpus	niger			Meigen, 1804			Y		Y	Y
709	Animalia	Arthropoda	Insecta	Diptera	Hybotidae	Platypalpus	pulicarius			Meigen, 1830		BOLD:AAQ0265	Y		Y	Y	BOLD:AAQ0265
710	Animalia	Arthropoda	Insecta	Diptera	Hybotidae	Platypalpus	stabilis			Collin, 1961			Y		Y	Y
711	Animalia	Arthropoda	Insecta	Diptera	Hybotidae	Platypalpus	unguiculatus			Zetterstedt, 1838		BOLD:ABA0579	Y		Y	Y	BOLD:ABA0579
712	Animalia	Arthropoda	Insecta	Diptera	Hybotidae	Tachydromia	aemula			Loew, 1864		BOLD:AAN5500	Y		Y	Y	BOLD:AAN5500
713	Animalia	Arthropoda	Insecta	Diptera	Keroplatidae	Orfelia	nemoralis			Meigen, 1818		BOLD:AAP2528	Y		Y	Y	BOLD:AAP2528
714	Animalia	Arthropoda	Insecta	Diptera	Lauxaniidae	Lauxania	shewelli			Perusse & Wheeler 2000			Y		Y	Y
715	Animalia	Arthropoda	Insecta	Diptera	Lauxaniidae	Poecilominettia	puncticeps			Coquillett, 1902		BOLD:AAN8633	Y		Y	Y	BOLD:AAN8633
716	Animalia	Arthropoda	Insecta	Diptera	Limoniidae	Epiphragma	fasciapenne			Say, 1823		BOLD:ACL8650	Y		Y	Y	BOLD:ACL8650
717	Animalia	Arthropoda	Insecta	Diptera	Limoniidae	Erioptera	caliptera			Say, 1823		BOLD:AAN5882	Y		Y	Y	BOLD:AAN5882
718	Animalia	Arthropoda	Insecta	Diptera	Limoniidae	Erioptera	ebenina			Alexander, 1926		BOLD:ACB0353	Y		Y	Y	BOLD:ACB0353
719	Animalia	Arthropoda	Insecta	Diptera	Limoniidae	Helius	flavipes			Macq.		BOLD:AAF9008	Y		Y	Y	BOLD:AAF9008
720	Animalia	Arthropoda	Insecta	Diptera	Limoniidae	Ilisia	venusta			Osten Sacken, 1860			Y		Y	Y
721	Animalia	Arthropoda	Insecta	Diptera	Limoniidae	Ormosia	affinis			Lundbeck, 1898		BOLD:AAU6544	Y		Y	Y	BOLD:AAU6544
722	Animalia	Arthropoda	Insecta	Diptera	Limoniidae	Ormosia	meigenii			Osten Sacken, 1859		BOLD:ACA9818	Y		Y	Y	BOLD:ACA9818
723	Animalia	Arthropoda	Insecta	Diptera	Limoniidae	Pseudolimnophila	inornata			Osten Sacken, 1869		BOLD:AAI1351	Y		Y	Y	BOLD:AAI1351
724	Animalia	Arthropoda	Insecta	Diptera	Lonchopteridae	Lonchoptera	bifurcata			Fallen, 1810			Y		Y	Y
725	Animalia	Arthropoda	Insecta	Diptera	Micropezidae	Compsobata	univitta			Walker, 1849		BOLD:AAP8989	Y	Y	Y	Y	BOLD:AAP8989
726	Animalia	Arthropoda	Insecta	Diptera	Micropezidae	Rainieria	antennaepes			Say, 1823			Y	Y
727	Animalia	Arthropoda	Insecta	Diptera	Milichiidae	Leptometopa	latipes			Meigen, 1830		BOLD:AAP8985	Y		Y	Y	BOLD:AAP8985
728	Animalia	Arthropoda	Insecta	Diptera	Milichiidae	Paramyia	nitens			Loew, 1869		BOLD:AAG0166|BOLD:AAG0169	Y		Y	Y	BOLD:AAG0166|BOLD:AAG0169
729	Animalia	Arthropoda	Insecta	Diptera	Milichiidae	Pholeomyia	indecora			Loew, 1869			Y		Y	Y
730	Animalia	Arthropoda	Insecta	Diptera	Muscidae	Coenosia	tigrina			Fabricius, 1775			Y		Y	Y
731	Animalia	Arthropoda	Insecta	Diptera	Muscidae	Helina	depuncta			Fallen, 1825			Y		Y	Y
732	Animalia	Arthropoda	Insecta	Diptera	Muscidae	Helina	evecta			Harris, 1780		BOLD:AAC2498	Y		Y	Y	BOLD:AAC2498
733	Animalia	Arthropoda	Insecta	Diptera	Muscidae	Helina	rufitibia			Stein, 1898		BOLD:AAG1742	Y		Y	Y	BOLD:AAG1742
734	Animalia	Arthropoda	Insecta	Diptera	Muscidae	Lispe	albitarsis			Stein, 1898		BOLD:AAP1125	Y		Y	Y	BOLD:AAP1125
735	Animalia	Arthropoda	Insecta	Diptera	Muscidae	Lispocephala	erythrocera			(Robineau-Desvoidy, 1830)			Y		Y	Y
736	Animalia	Arthropoda	Insecta	Diptera	Muscidae	Macrorchis	ausoba			Walker, 1849			Y		Y	Y
737	Animalia	Arthropoda	Insecta	Diptera	Muscidae	Muscina	levida			Harris, 1788		BOLD:AAB8817	Y		Y	Y	BOLD:AAB8817
738	Animalia	Arthropoda	Insecta	Diptera	Muscidae	Myospila	meditabunda			Fabricius, 1781		BOLD:AAD7145	Y		Y	Y	BOLD:AAD7145
739	Animalia	Arthropoda	Insecta	Diptera	Mycetophilidae	Aglaomyia	gatineau			Vockeroth, 1980		BOLD:ABV3010	Y		Y	Y	BOLD:ABV3010
740	Animalia	Arthropoda	Insecta	Diptera	Mycetophilidae	Exechia	attrita			Johannsen, 1912		BOLD:ACM3454	Y		Y	Y	BOLD:ACM3454
741	Animalia	Arthropoda	Insecta	Diptera	Mycetophilidae	Mycetophila	caudata			Staeger, 1840		BOLD:AAI3260	Y		Y	Y	BOLD:AAI3260
742	Animalia	Arthropoda	Insecta	Diptera	Mycetophilidae	Mycetophila	fungorum			De Geer, 1776		BOLD:ACF2821	Y		Y	Y	BOLD:ACF2821
743	Animalia	Arthropoda	Insecta	Diptera	Mycetophilidae	Mycetophila	ocellus			Walker, 1848		BOLD:AAP4734	Y		Y	Y	BOLD:AAP4734
744	Animalia	Arthropoda	Insecta	Diptera	Mycetophilidae	Paratinia	recurva			Johannsen, 1910			Y	Y
745	Animalia	Arthropoda	Insecta	Diptera	Mycetophilidae	Symmerus	lautus			Loew, 1869			Y	Y
746	Animalia	Arthropoda	Insecta	Diptera	Mycetophilidae	Trichonta	submaculata			(Staeger, 1840)		BOLD:AAU4912	Y		Y	Y	BOLD:AAU4912
747	Animalia	Arthropoda	Insecta	Diptera	Mycetophilidae	Zygomyia	zaitzevi			Chandler, 1991			Y		Y	Y
748	Animalia	Arthropoda	Insecta	Diptera	Odiniidae	Odinia	betulae			Sabrosky, 1959		BOLD:AAP8071	Y		Y	Y	BOLD:AAP8071
749	Animalia	Arthropoda	Insecta	Diptera	Odiniidae	Odinia	meijerei			Collin, 1952		BOLD:ACV3828	Y		Y	Y	BOLD:ACV3828
750	Animalia	Arthropoda	Insecta	Diptera	Opomyzidae	Geomyza	apicalis			(Meigen, 1830)		BOLD:ACM2703	Y		Y	Y	BOLD:ACM2703
751	Animalia	Arthropoda	Insecta	Diptera	Opomyzidae	Geomyza	tripunctata			Fallen, 1823			Y		Y	Y
752	Animalia	Arthropoda	Insecta	Diptera	Pediciidae	Pedicia	inconstans			Osten Sacken, 1859			Y		Y	Y
753	Animalia	Arthropoda	Insecta	Diptera	Phoridae	Conicera	dauci			Meigen, 1830		BOLD:AAN8685	Y		Y	Y	BOLD:AAN8685
754	Animalia	Arthropoda	Insecta	Diptera	Phoridae	Megaselia	arcticae			Disney, 2004		BOLD:AAG3248	Y		Y	Y	BOLD:AAG3248
755	Animalia	Arthropoda	Insecta	Diptera	Phoridae	Megaselia	citrinella			Buck & Disney, 2001			Y	Y
756	Animalia	Arthropoda	Insecta	Diptera	Phoridae	Megaselia	fungivora			Wood, 1909			Y		Y	Y
757	Animalia	Arthropoda	Insecta	Diptera	Phoridae	Megaselia	lucifrons			(Schmitz, 1918)		BOLD:AAL9075	Y		Y	Y	BOLD:AAL9075
758	Animalia	Arthropoda	Insecta	Diptera	Phoridae	Megaselia	nigriceps			Loew, 1866		BOLD:AAY6384	Y		Y	Y	BOLD:AAY6384
759	Animalia	Arthropoda	Insecta	Diptera	Phoridae	Megaselia	rufipes			Meigen, 1804		BOLD:AAG3274	Y		Y	Y	BOLD:AAG3274
760	Animalia	Arthropoda	Insecta	Diptera	Phoridae	Megaselia	variana			Schmitz, 1926		BOLD:AAZ6701	Y		Y	Y	BOLD:AAZ6701
761	Animalia	Arthropoda	Insecta	Diptera	Pipunculidae	Pipunculus	hertzogi			Rapp, 1943			Y		Y	Y
762	Animalia	Arthropoda	Insecta	Diptera	Psilidae	Loxocera	cylindrica			Say, 1823			Y	Y
763	Animalia	Arthropoda	Insecta	Diptera	Psilidae	Psila	lateralis			Loew, 1860		BOLD:AAF9707	Y		Y	Y	BOLD:AAF9707
764	Animalia	Arthropoda	Insecta	Diptera	Psilidae	Psila	persimilis			Wakerly, 1959			Y	Y
765	Animalia	Arthropoda	Insecta	Diptera	Psilidae	Psila	rosae			Fabricius, 1794		BOLD:AAP6388	Y		Y	Y	BOLD:AAP6388
766	Animalia	Arthropoda	Insecta	Diptera	Psychodidae	Psychoda	trinodulosa			Tonnoir, 1922		BOLD:AAN8770	Y		Y	Y	BOLD:AAN8770
767	Animalia	Arthropoda	Insecta	Diptera	Rhagionidae	Bolbomyia	nana			Loew, 1862		BOLD:ACV5660	Y		Y	Y	BOLD:ACV5660
768	Animalia	Arthropoda	Insecta	Diptera	Rhagionidae	Chrysopilus	thoracicus			Fabricius, 1805			Y	Y
769	Animalia	Arthropoda	Insecta	Diptera	Rhagionidae	Rhagio	tringarius			Linnaeus, 1758			Y		Y	Y
770	Animalia	Arthropoda	Insecta	Diptera	Sarcophagidae	Boettcheria	bisetosa			Parker, 1914		BOLD:AAH7139	Y		Y	Y	BOLD:AAH7139
771	Animalia	Arthropoda	Insecta	Diptera	Sarcophagidae	Boettcheria	cimbicis			Townsend, 1892			Y		Y	Y
772	Animalia	Arthropoda	Insecta	Diptera	Sarcophagidae	Sarcophaga	subvicina			Baranov, 1937		BOLD:AAG6743	Y		Y	Y	BOLD:AAG6743
773	Animalia	Arthropoda	Insecta	Diptera	Sarcophagidae	Senotainia	trilineata			Wulp, 1890		BOLD:AAG6744	Y		Y	Y	BOLD:AAG6744
774	Animalia	Arthropoda	Insecta	Diptera	Scathophagidae	Americina	adusta			Loew, 1863		BOLD:AAH4235	Y		Y	Y	BOLD:AAH4235
775	Animalia	Arthropoda	Insecta	Diptera	Scathophagidae	Megaphthalma	pallida			Fallen, 1819		BOLD:AAH4234	Y		Y	Y	BOLD:AAH4234
776	Animalia	Arthropoda	Insecta	Diptera	Scathophagidae	Parallelomma	vittatum			Meigen, 1826			Y	Y
777	Animalia	Arthropoda	Insecta	Diptera	Scathophagidae	Scathophaga	furcata			Say, 1823		BOLD:AAH0022	Y		Y	Y	BOLD:AAH0022
778	Animalia	Arthropoda	Insecta	Diptera	Sciaridae	Bradysia	difformis			Frey, 1948		BOLD:AAV1295	Y		Y	Y	BOLD:AAV1295
779	Animalia	Arthropoda	Insecta	Diptera	Sciaridae	Bradysia	fenestralis			Zetterstedt, 1838		BOLD:AAV1366	Y		Y	Y	BOLD:AAV1366
780	Animalia	Arthropoda	Insecta	Diptera	Sciaridae	Bradysia	nitidicollis			Meigen, 1818			Y		Y	Y
781	Animalia	Arthropoda	Insecta	Diptera	Sciaridae	Bradysia	pallipes			Fabricius, 1787		BOLD:AAM9254	Y		Y	Y	BOLD:AAM9254
782	Animalia	Arthropoda	Insecta	Diptera	Sciaridae	Bradysia	scabricornis			Tuomikoski, 1960		BOLD:ABA0929	Y		Y	Y	BOLD:ABA0929
783	Animalia	Arthropoda	Insecta	Diptera	Sciaridae	Bradysia	vagans			Winnertz, 1868		BOLD:AAM9252	Y		Y	Y	BOLD:AAM9252
784	Animalia	Arthropoda	Insecta	Diptera	Sciaridae	Camptochaeta	uniformis			Mohrig & Menzel , 1990		BOLD:ACA4924	Y		Y	Y	BOLD:ACA4924
785	Animalia	Arthropoda	Insecta	Diptera	Sciaridae	Corynoptera	bicuspidata			Lengersdorf, 1926		BOLD:AAU6513	Y		Y	Y	BOLD:AAU6513
786	Animalia	Arthropoda	Insecta	Diptera	Sciaridae	Corynoptera	cuniculata			Lengersdorf, 1942		BOLD:AAU6537	Y		Y	Y	BOLD:AAU6537
787	Animalia	Arthropoda	Insecta	Diptera	Sciaridae	Corynoptera	melanochaeta			Mohrig & Menzel, 1992		BOLD:AAM9242	Y		Y	Y	BOLD:AAM9242
788	Animalia	Arthropoda	Insecta	Diptera	Sciaridae	Corynoptera	saccata			Tuomikoski, 1960		BOLD:AAN6437	Y		Y	Y	BOLD:AAN6437
789	Animalia	Arthropoda	Insecta	Diptera	Sciaridae	Corynoptera	subcavipes			Menzel & Smith, 2007		BOLD:AAU6542	Y		Y	Y	BOLD:AAU6542
790	Animalia	Arthropoda	Insecta	Diptera	Sciaridae	Cratyna	ambigua			Lengersdorf, 1934		BOLD:AAH3968|BOLD:AAN6439	Y		Y	Y	BOLD:AAH3968|BOLD:AAN6439
791	Animalia	Arthropoda	Insecta	Diptera	Sciaridae	Ctenosciara	hyalipennis			Meigen, 1804		BOLD:AAH3983	Y		Y	Y	BOLD:AAH3983
792	Animalia	Arthropoda	Insecta	Diptera	Sciaridae	Leptosciarella	scutellata			Staeger, 1840		BOLD:ACD1218	Y		Y	Y	BOLD:ACD1218
793	Animalia	Arthropoda	Insecta	Diptera	Sciaridae	Lycoriella	castanescens			Lengersdorf, 1940		BOLD:ABA1215	Y		Y	Y	BOLD:ABA1215
794	Animalia	Arthropoda	Insecta	Diptera	Sciaridae	Lycoriella	perochaeta			Mohrig & Menzel, 1990		BOLD:ACC1855	Y		Y	Y	BOLD:ACC1855
795	Animalia	Arthropoda	Insecta	Diptera	Sciaridae	Lycoriella	stylata			Mohrig & Mamaev , 1985		BOLD:AAN6430	Y		Y	Y	BOLD:AAN6430
796	Animalia	Arthropoda	Insecta	Diptera	Sciaridae	Scatopsciara	atomaria			Zetterstedt, 1851		BOLD:AAN6431	Y		Y	Y	BOLD:AAN6431
797	Animalia	Arthropoda	Insecta	Diptera	Sciaridae	Sciara	humeralis			Zetterstedt, 1851			Y		Y	Y
798	Animalia	Arthropoda	Insecta	Diptera	Sciomyzidae	Poecilographa	decorum			Loew, 1864			Y	Y
799	Animalia	Arthropoda	Insecta	Diptera	Sciomyzidae	Pteromicra	similis			Steyskal, 1954		BOLD:AAG6869	Y		Y	Y	BOLD:AAG6869
800	Animalia	Arthropoda	Insecta	Diptera	Sciomyzidae	Tetanocera	plumosa			Loew, 1847			Y		Y	Y
801	Animalia	Arthropoda	Insecta	Diptera	Sciomyzidae	Trypetoptera	canadensis			Macquart, 1843			Y		Y	Y
802	Animalia	Arthropoda	Insecta	Diptera	Sepsidae	Nemopoda	nitidula			Fallen, 1820		BOLD:AAG5640	Y	Y	Y	Y	BOLD:AAG5640
803	Animalia	Arthropoda	Insecta	Diptera	Sepsidae	Saltella	sphondylii			Schrank, 1803			Y	Y
804	Animalia	Arthropoda	Insecta	Diptera	Sepsidae	Sepsis	punctum			Fabricius, 1794		BOLD:AAG5639	Y		Y	Y	BOLD:AAG5639
805	Animalia	Arthropoda	Insecta	Diptera	Simuliidae	Prosimulium	arvum			Adler and Kim, 1985		BOLD:AAD4764	Y		Y	Y	BOLD:AAD4764
806	Animalia	Arthropoda	Insecta	Diptera	Simuliidae	Prosimulium	mixtum			Syme and Davies, 1958			Y		Y	Y
807	Animalia	Arthropoda	Insecta	Diptera	Simuliidae	Simulium	vittatum			Zetterstedt, 1838		BOLD:AAA4121	Y		Y	Y	BOLD:AAA4121
808	Animalia	Arthropoda	Insecta	Diptera	Sphaeroceridae	Apteromyia	claviventris			Strobl, 1909		BOLD:AAG7283	Y	Y	Y	Y	BOLD:AAG7283
809	Animalia	Arthropoda	Insecta	Diptera	Sphaeroceridae	Coproica	acutangula			Zetterstedt, 1847			Y	Y
810	Animalia	Arthropoda	Insecta	Diptera	Sphaeroceridae	Coproica	ferruginata			Stenhammar, 1854		BOLD:AAN6407	Y	Y	Y	Y	BOLD:AAN6407
811	Animalia	Arthropoda	Insecta	Diptera	Sphaeroceridae	Coproica	hirtula			Rondani, 1880		BOLD:ACF7714	Y		Y	Y	BOLD:ACF7714
812	Animalia	Arthropoda	Insecta	Diptera	Sphaeroceridae	Copromyza	equina			Fallen, 1820		BOLD:AAJ7412	Y	Y	Y	Y	BOLD:AAJ7412
813	Animalia	Arthropoda	Insecta	Diptera	Sphaeroceridae	Gonioneura	spinipennis			Haliday, 1836			Y	Y
814	Animalia	Arthropoda	Insecta	Diptera	Sphaeroceridae	Ischiolepta	pusilla			Fallen, 1820			Y	Y
815	Animalia	Arthropoda	Insecta	Diptera	Sphaeroceridae	Leptocera	caenosa			Rondani, 1880			Y	Y
816	Animalia	Arthropoda	Insecta	Diptera	Sphaeroceridae	Leptocera	erythrocera			Becker, 1919		BOLD:AAG7276	Y	Y	Y	Y	BOLD:AAG7276
817	Animalia	Arthropoda	Insecta	Diptera	Sphaeroceridae	Lotophila	atra			Meigen, 1830			Y	Y	Y	Y
818	Animalia	Arthropoda	Insecta	Diptera	Sphaeroceridae	Minilimosina	fungicola			Spuler, 1925			Y	Y
819	Animalia	Arthropoda	Insecta	Diptera	Sphaeroceridae	Minilimosina	intercepta			Marshall, 1985		BOLD:AAG7309	Y		Y	Y	BOLD:AAG7309
820	Animalia	Arthropoda	Insecta	Diptera	Sphaeroceridae	Opalimosina	mirabilis			Collin, 1902			Y	Y
821	Animalia	Arthropoda	Insecta	Diptera	Sphaeroceridae	Pullimosina	heteroneura			Haliday, 1836			Y	Y
822	Animalia	Arthropoda	Insecta	Diptera	Sphaeroceridae	Pullimosina	longicosta			Spuler, 1925			Y	Y
823	Animalia	Arthropoda	Insecta	Diptera	Sphaeroceridae	Pullimosina	pullula			Zetterstedt, 1847			Y	Y
824	Animalia	Arthropoda	Insecta	Diptera	Sphaeroceridae	Rachispoda	fumipennis-group			Spuler 1924			Y	Y
825	Animalia	Arthropoda	Insecta	Diptera	Sphaeroceridae	Rachispoda	limosa			Fallén, 1820			Y	Y
826	Animalia	Arthropoda	Insecta	Diptera	Sphaeroceridae	Rachispoda	lutosa-group			Stenhammar, 1855			Y	Y
827	Animalia	Arthropoda	Insecta	Diptera	Sphaeroceridae	Sclerocoelus	sordipes			Adams 1904			Y	Y
828	Animalia	Arthropoda	Insecta	Diptera	Sphaeroceridae	Spelobia	bifrons			Stenhammar, 1854			Y	Y
829	Animalia	Arthropoda	Insecta	Diptera	Sphaeroceridae	Spelobia	clunipes			Meigen, 1830			Y	Y
830	Animalia	Arthropoda	Insecta	Diptera	Sphaeroceridae	Spelobia	luteilabris			Rondani, 1880			Y	Y
831	Animalia	Arthropoda	Insecta	Diptera	Sphaeroceridae	Spelobia	ochripes			Meigen, 1830		BOLD:AAG7279	Y	Y	Y	Y	BOLD:AAG7279
832	Animalia	Arthropoda	Insecta	Diptera	Sphaeroceridae	Spelobia	semioculata			Richards, 1965			Y	Y
833	Animalia	Arthropoda	Insecta	Diptera	Sphaeroceridae	Sphaerocera	curvipes			Latreille, 1805			Y	Y
834	Animalia	Arthropoda	Insecta	Diptera	Sphaeroceridae	Telomerina	flavipes			Meigen, 1830		BOLD:ACJ1971	Y		Y	Y	BOLD:ACJ1971
835	Animalia	Arthropoda	Insecta	Diptera	Sphaeroceridae	Trachyopella	nuda			Rohacek and Marshall, 1985			Y	Y
836	Animalia	Arthropoda	Insecta	Diptera	Stratiomyidae	Actina	viridis			Say, 1824		BOLD:AAP7640	Y		Y	Y	BOLD:AAP7640
837	Animalia	Arthropoda	Insecta	Diptera	Stratiomyidae	Allognosta	fuscitarsis			Say, 1823			Y	Y	Y	Y
838	Animalia	Arthropoda	Insecta	Diptera	Stratiomyidae	Allognosta	obscuriventris			Loew, 1863			Y	Y	Y	Y
839	Animalia	Arthropoda	Insecta	Diptera	Stratiomyidae	Caloparyphus	tetraspilus			Loew, 1866			Y	Y
840	Animalia	Arthropoda	Insecta	Diptera	Stratiomyidae	Euparyphus	stigmaticalis			Loew, 1866			Y	Y
841	Animalia	Arthropoda	Insecta	Diptera	Stratiomyidae	Microchrysa	polita			Linnaeus, 1758			Y	Y
842	Animalia	Arthropoda	Insecta	Diptera	Stratiomyidae	Nemotelus	bruesii			Melander, 1903			Y		Y	Y
843	Animalia	Arthropoda	Insecta	Diptera	Stratiomyidae	Nemotelus	centralis			Hanson, 1958			Y	Y
844	Animalia	Arthropoda	Insecta	Diptera	Stratiomyidae	Psellidotus	meganticus			Curran, 1925			Y	Y
845	Animalia	Arthropoda	Insecta	Diptera	Stratiomyidae	Ptecticus	gigliotosi			McFadden, 1971			Y	Y
846	Animalia	Arthropoda	Insecta	Diptera	Stratiomyidae	Sargus	decorus			Say, 1824			Y	Y
847	Animalia	Arthropoda	Insecta	Diptera	Stratiomyidae	Stratiomys	norma			Wiedemann, 1830			Y	Y
848	Animalia	Arthropoda	Insecta	Diptera	Stratiomyidae	Stratiomys	obesa			Loew, 1866			Y	Y
849	Animalia	Arthropoda	Insecta	Diptera	Syrphidae	Allograpta	micrura			Osten Sacken, 1877			Y	Y
850	Animalia	Arthropoda	Insecta	Diptera	Syrphidae	Allograpta	obliqua			Say, 1823		BOLD:AAD8276	Y	Y	Y	Y	BOLD:AAD8276
851	Animalia	Arthropoda	Insecta	Diptera	Syrphidae	Brachyopa	sedmani						Y		Y	Y
852	Animalia	Arthropoda	Insecta	Diptera	Syrphidae	Brachypalpus	oarus			Walker, 1849		BOLD:AAP8757	Y		Y	Y	BOLD:AAP8757
853	Animalia	Arthropoda	Insecta	Diptera	Syrphidae	Chalcosyrphus	libo			Walker, 1849		BOLD:AAG4679	Y		Y	Y	BOLD:AAG4679
854	Animalia	Arthropoda	Insecta	Diptera	Syrphidae	Chalcosyrphus	nemorum			Fabricius, 1805		BOLD:AAG6762	Y	Y	Y	Y	BOLD:AAG6762
855	Animalia	Arthropoda	Insecta	Diptera	Syrphidae	Chrysotoxum	pubescens			Loew, 1864			Y	Y
856	Animalia	Arthropoda	Insecta	Diptera	Syrphidae	Dasysyrphus	venustus			Meigen		BOLD:ACV5348	Y		Y	Y	BOLD:ACV5348
857	Animalia	Arthropoda	Insecta	Diptera	Syrphidae	Epistrophe	nitidicollis			Meigen, 1822			Y	Y
858	Animalia	Arthropoda	Insecta	Diptera	Syrphidae	Eristalis	arbustorum			Linnaeus, 1758			Y	Y
859	Animalia	Arthropoda	Insecta	Diptera	Syrphidae	Eristalis	dimidiata			Wiedemann, 1830			Y	Y
860	Animalia	Arthropoda	Insecta	Diptera	Syrphidae	Eristalis	flavipes			Walker, 1849			Y	Y
861	Animalia	Arthropoda	Insecta	Diptera	Syrphidae	Eristalis	stipator			Osten Sacken, 1877			Y	Y
862	Animalia	Arthropoda	Insecta	Diptera	Syrphidae	Eristalis	tenax			Linnaeus, 1758			Y	Y
863	Animalia	Arthropoda	Insecta	Diptera	Syrphidae	Eristalis	transversa			Wiedemann, 1830			Y	Y
864	Animalia	Arthropoda	Insecta	Diptera	Syrphidae	Eumerus	sp.						N	Y
865	Animalia	Arthropoda	Insecta	Diptera	Syrphidae	Eupeodes	americanus			Wiedemann, 1830			Y	Y
866	Animalia	Arthropoda	Insecta	Diptera	Syrphidae	Eupeodes	volucris			Osten Sacken, 1877			Y	Y
867	Animalia	Arthropoda	Insecta	Diptera	Syrphidae	Ferdinandea	buccata			Loew, 1863		BOLD:AAE0948	Y		Y	Y	BOLD:AAE0948
868	Animalia	Arthropoda	Insecta	Diptera	Syrphidae	Helophilus	fasciatus			Walker, 1849			Y	Y
869	Animalia	Arthropoda	Insecta	Diptera	Syrphidae	Heringia	salax			Loew, 1866			Y	Y
870	Animalia	Arthropoda	Insecta	Diptera	Syrphidae	Lejota	aerea			Loew, 1872		BOLD:AAY9807	Y		Y	Y	BOLD:AAY9807
871	Animalia	Arthropoda	Insecta	Diptera	Syrphidae	Mallota	posticata			Fabricius, 1805			Y	Y
872	Animalia	Arthropoda	Insecta	Diptera	Syrphidae	Melanotstoma	mellinum			Linnaeus 1758			Y	Y
873	Animalia	Arthropoda	Insecta	Diptera	Syrphidae	Merodon	equestris			Fabricius, 1794			Y	Y
874	Animalia	Arthropoda	Insecta	Diptera	Syrphidae	Microdon	tristis			Loew, 1864			Y	Y
875	Animalia	Arthropoda	Insecta	Diptera	Syrphidae	Myolepta	nigra			Loew, 1972		BOLD:AAV0836	Y		Y	Y	BOLD:AAV0836
876	Animalia	Arthropoda	Insecta	Diptera	Syrphidae	Neoascia	distincta			Williston, 1887		BOLD:AAG6766	Y		Y	Y	BOLD:AAG6766
877	Animalia	Arthropoda	Insecta	Diptera	Syrphidae	Ocyptamus	fuscipennis			Macquart, 1834			Y	Y
878	Animalia	Arthropoda	Insecta	Diptera	Syrphidae	Orthonevra	nitida			Wiedemann, 1830			Y	Y
879	Animalia	Arthropoda	Insecta	Diptera	Syrphidae	Paragus	haemorrhous			Meigen, 1822		BOLD:AAC2439	Y	Y	Y	Y	BOLD:AAC2439
880	Animalia	Arthropoda	Insecta	Diptera	Syrphidae	Parhelophilus	laetus			Loew, 1963			Y	Y
881	Animalia	Arthropoda	Insecta	Diptera	Syrphidae	Platycheirus	hyperboreus			Staeger, 1845		BOLD:ACF4734	Y	Y	Y	Y	BOLD:ACF4734
882	Animalia	Arthropoda	Insecta	Diptera	Syrphidae	Platycheirus	obscurus			Say, 1824		BOLD:AAF1237	Y		Y	Y	BOLD:AAF1237
883	Animalia	Arthropoda	Insecta	Diptera	Syrphidae	Platycheirus	quadratus			Say, 1823			Y	Y
884	Animalia	Arthropoda	Insecta	Diptera	Syrphidae	Platycheirus	scambus			Staeger, 1843			Y	Y
885	Animalia	Arthropoda	Insecta	Diptera	Syrphidae	Sericomyia	chrysotoxoides			Macquart, 1842		BOLD:ABX5395	Y		Y	Y	BOLD:ABX5395
886	Animalia	Arthropoda	Insecta	Diptera	Syrphidae	Sphaerophoria	asymmetrica			Knutson, 1973			Y	Y
887	Animalia	Arthropoda	Insecta	Diptera	Syrphidae	Sphaerophoria	bifurcata			Knutson, 1973			Y	Y
888	Animalia	Arthropoda	Insecta	Diptera	Syrphidae	Sphaerophoria	brevipilosa			Knutson, 1973			Y	Y
889	Animalia	Arthropoda	Insecta	Diptera	Syrphidae	Sphaerophoria	contigua			Macquart, 1847			Y	Y
890	Animalia	Arthropoda	Insecta	Diptera	Syrphidae	Sphaerophoria	philanthus			Meigen			Y	Y
891	Animalia	Arthropoda	Insecta	Diptera	Syrphidae	Sphegina	keeniana			Williston, 1887		BOLD:ACR0385	Y		Y	Y	BOLD:ACR0385
892	Animalia	Arthropoda	Insecta	Diptera	Syrphidae	Sphegina	petiolata			Coquillett, 1910			Y	Y
893	Animalia	Arthropoda	Insecta	Diptera	Syrphidae	Spilomyia	longicornis			Loew, 1872			Y	Y
894	Animalia	Arthropoda	Insecta	Diptera	Syrphidae	Syritta	pipiens			Linnaeus, 1758			Y	Y
895	Animalia	Arthropoda	Insecta	Diptera	Syrphidae	Syrphus	rectus			Osten Sacken, 1875			Y	Y
896	Animalia	Arthropoda	Insecta	Diptera	Syrphidae	Syrphus	ribesii			Linnaeus		BOLD:AAA4570	Y	Y	Y	Y	BOLD:AAA4570
897	Animalia	Arthropoda	Insecta	Diptera	Syrphidae	Syrphus	torvus			Osten Sacken, 1875		BOLD:AAC6088	Y		Y	Y	BOLD:AAC6088
898	Animalia	Arthropoda	Insecta	Diptera	Syrphidae	Toxomerus	geminatus			Say, 1923		BOLD:AAC1312	Y	Y	Y	Y	BOLD:AAC1312
899	Animalia	Arthropoda	Insecta	Diptera	Syrphidae	Toxomerus	marginatus			Say, 1823		BOLD:AAA4277	Y	Y	Y	Y	BOLD:AAA4277
900	Animalia	Arthropoda	Insecta	Diptera	Syrphidae	Xanthogramma	flavipes			Loew, 1863		BOLD:AAK0114	Y		Y	Y	BOLD:AAK0114
901	Animalia	Arthropoda	Insecta	Diptera	Syrphidae	Xylota	quadrimaculata			Loew, 1866			Y	Y
902	Animalia	Arthropoda	Insecta	Diptera	Tabanidae	Chrysops	aestuans			Wulp, 1867			Y	Y
903	Animalia	Arthropoda	Insecta	Diptera	Tabanidae	Chrysops	ater			Macquart, 1850		BOLD:ACE5640	Y		Y	Y	BOLD:ACE5640
904	Animalia	Arthropoda	Insecta	Diptera	Tabanidae	Chrysops	calvus			Pechuman and Teskey, 1967			Y	Y
905	Animalia	Arthropoda	Insecta	Diptera	Tabanidae	Chrysops	lateralis			Wiedemann, 1828			Y	Y
906	Animalia	Arthropoda	Insecta	Diptera	Tabanidae	Chrysops	striatus			Osten Sacken, 1875			Y	Y
907	Animalia	Arthropoda	Insecta	Diptera	Tabanidae	Chrysops	vittatus			Wiedemann, 1821			Y		Y	Y
908	Animalia	Arthropoda	Insecta	Diptera	Tabanidae	Hybomitra	epistates			Osten Sacken, 1878			Y	Y
909	Animalia	Arthropoda	Insecta	Diptera	Tabanidae	Hybomitra	lasiophthalma			Macquart, 1838		BOLD:AAF0889	Y	Y	Y	Y	BOLD:AAF0889
910	Animalia	Arthropoda	Insecta	Diptera	Tabanidae	Tabanus	lineola			Fabricius			Y	Y
911	Animalia	Arthropoda	Insecta	Diptera	Tachinidae	Actia	interrupta			Curran, 1933			Y		Y	Y
912	Animalia	Arthropoda	Insecta	Diptera	Tachinidae	Blepharomyia	pagana			Meigen, 1824		BOLD:AAV0903	Y		Y	Y	BOLD:AAV0903
913	Animalia	Arthropoda	Insecta	Diptera	Tachinidae	Campylocheta	teliosis			Reinhard, 1952			Y		Y	Y
914	Animalia	Arthropoda	Insecta	Diptera	Tachinidae	Ceracia	dentata			Coquillett, 1895		BOLD:ABX6290	Y		Y	Y	BOLD:ABX6290
915	Animalia	Arthropoda	Insecta	Diptera	Tachinidae	Homalactia	harringtoni			Coquillett, 1902		BOLD:AAP2717	Y		Y	Y	BOLD:AAP2717
916	Animalia	Arthropoda	Insecta	Diptera	Tachinidae	Leschenaultia	exul			Townsend, 1892		BOLD:ACE2864	Y		Y	Y	BOLD:ACE2864
917	Animalia	Arthropoda	Insecta	Diptera	Tachinidae	Lydina	americana			Townsend, 1892		BOLD:AAG2432	Y		Y	Y	BOLD:AAG2432
918	Animalia	Arthropoda	Insecta	Diptera	Tachinidae	Oswaldia	minor			Curran, 1925		BOLD:ACF1129	Y		Y	Y	BOLD:ACF1129
919	Animalia	Arthropoda	Insecta	Diptera	Tachinidae	Phorocera	obscura			Fallen, 1810		BOLD:ABY8575	Y		Y	Y	BOLD:ABY8575
920	Animalia	Arthropoda	Insecta	Diptera	Tachinidae	Siphona	hokkaidensis			Mesnil, 1957		BOLD:AAG2172	Y		Y	Y	BOLD:AAG2172
921	Animalia	Arthropoda	Insecta	Diptera	Tachinidae	Siphona	intrudens			Curran, 1932		BOLD:AAP2721	Y		Y	Y	BOLD:AAP2721
922	Animalia	Arthropoda	Insecta	Diptera	Tachinidae	Siphona	pisinnia			O'Hara, 1983		BOLD:AAZ4865	Y		Y	Y	BOLD:AAZ4865
923	Animalia	Arthropoda	Insecta	Diptera	Tephritidae	Euaresta	bella			Loew, 1862			Y	Y
924	Animalia	Arthropoda	Insecta	Diptera	Tephritidae	Eurosta	solidaginis			Fitch, 1855			Y	Y
925	Animalia	Arthropoda	Insecta	Diptera	Tephritidae	Eutreta	novaeboracensis			Fitch, 1855			Y	Y
926	Animalia	Arthropoda	Insecta	Diptera	Tephritidae	Rhagoletis	suavis			Loew, 1862			Y		Y	Y
927	Animalia	Arthropoda	Insecta	Diptera	Tephritidae	Urophora	cardui			Linnaeus, 1758			Y	Y
928	Animalia	Arthropoda	Insecta	Diptera	Tephritidae	Xanthomyia	platyptera			Loew, 1873			Y	Y
929	Animalia	Arthropoda	Insecta	Diptera	Tipulidae	Nephrotoma	cornicina			Linnaeus, 1758			Y		Y	Y
930	Animalia	Arthropoda	Insecta	Diptera	Tipulidae	Tipula	(Beringotipula) coloradensis			Doane, 1911			Y		Y	Y
931	Animalia	Arthropoda	Insecta	Diptera	Tipulidae	Tipula	dorsimacula			Walker, 1848		BOLD:AAF8990	Y		Y	Y	BOLD:AAF8990
932	Animalia	Arthropoda	Insecta	Diptera	Tipulidae	Tipula	mallochi			Alexander			Y		Y	Y
933	Animalia	Arthropoda	Insecta	Diptera	Xylomyidae	Macroceromys	terminalis			Vasey 1977			Y	Y
934	Animalia	Arthropoda	Insecta	Diptera	Xylomyidae	Solva	pallipes			Loew, 1863			Y	Y
935	Animalia	Arthropoda	Insecta	Diptera	Xylomyidae	Xylomyia	americana			Weid			Y	Y
936	Animalia	Arthropoda	Insecta	Diptera	Xylomyidae	Xylomyia	simillima			Steyskal 1947			Y	Y
937	Animalia	Arthropoda	Insecta	Diptera	Xylomyidae	Xylomyia	tenthredinoides			Van der Wulp 1867			Y	Y
938	Animalia	Arthropoda	Insecta	Diptera	Xylophagidae	Xylophagus	lugens			Loew, 1863		BOLD:AAJ9649	Y		Y	Y	BOLD:AAJ9649
939	Animalia	Arthropoda	Insecta	Diptera	Xylophagidae	Xylophagus	reflectens			Walker, 1848		BOLD:AAM7333|BOLD:AAP7637	Y	Y	Y	Y	BOLD:AAM7333|BOLD:AAP7637
940	Animalia	Arthropoda	Insecta	Ephemeroptera	Baetidae	Baetis	intercalaris			McDunnough, 1921			Y		Y	Y
941	Animalia	Arthropoda	Insecta	Ephemeroptera	Baetidae	Callibaetis	ferrugineus			Walsh, 1862			Y		Y	Y
942	Animalia	Arthropoda	Insecta	Ephemeroptera	Baetidae	Cloeon	dipterum			Linnaeus, 1761			Y		Y	Y
943	Animalia	Arthropoda	Insecta	Ephemeroptera	Baetidae	Iswaeon	anoka			Daggy, 1945			Y		Y	Y
944	Animalia	Arthropoda	Insecta	Ephemeroptera	Caenidae	Caenis	latipennis			Banks, 1907			Y		Y	Y
945	Animalia	Arthropoda	Insecta	Ephemeroptera	Ephemeridae	Hexagenia	limbata			Serville, 1829			Y		Y	Y
946	Animalia	Arthropoda	Insecta	Ephemeroptera	Heptageniidae	Stenacron	interpunctatum			Say, 1839			Y		Y	Y
947	Animalia	Arthropoda	Insecta	Hemiptera	Anthocoridae	Cardiastethus	borealis			Kelton, 1977			Y	Y
948	Animalia	Arthropoda	Insecta	Hemiptera	Anthocoridae	Orius	insidiosus			Say, 1832			Y	Y
949	Animalia	Arthropoda	Insecta	Hemiptera	Anthocoridae	Orius	tristicolor			White, 1879			Y	Y
950	Animalia	Arthropoda	Insecta	Hemiptera	Aphididae	Acyrthosiphon	malvae			Mosley, 1841		BOLD:AAF3206	Y		Y	Y	BOLD:AAF3206
951	Animalia	Arthropoda	Insecta	Hemiptera	Aphididae	Acyrthosiphon	pisum			Harris, 1776			Y		Y	Y
952	Animalia	Arthropoda	Insecta	Hemiptera	Aphididae	Aphis	glycines			Matsumura, 1917		BOLD:AAB7938	Y		Y	Y	BOLD:AAB7938
953	Animalia	Arthropoda	Insecta	Hemiptera	Aphididae	Aphis	middletonii			Thomas, 1879		BOLD:AAB6817	Y		Y	Y	BOLD:AAB6817
954	Animalia	Arthropoda	Insecta	Hemiptera	Aphididae	Aphis	rubicola			Oestlund, 1887		BOLD:AAF7621	Y		Y	Y	BOLD:AAF7621
955	Animalia	Arthropoda	Insecta	Hemiptera	Aphididae	Eriosoma	americanum			Riley, C.V., 1879		BOLD:AAD7955	Y		Y	Y	BOLD:AAD7955
956	Animalia	Arthropoda	Insecta	Hemiptera	Aphididae	Eucallipterus	tiliae			Linnaeus, 1758		BOLD:AAD0131	Y		Y	Y	BOLD:AAD0131
957	Animalia	Arthropoda	Insecta	Hemiptera	Aphididae	Lipaphis	pseudobrassicae			Davis, 1914		BOLD:AAD9153	Y		Y	Y	BOLD:AAD9153
958	Animalia	Arthropoda	Insecta	Hemiptera	Aphididae	Melaphis	rhois			Fitch, 1866		BOLD:AAA2079	Y		Y	Y	BOLD:AAA2079
959	Animalia	Arthropoda	Insecta	Hemiptera	Aphididae	Rhopalosiphum	nymphaeae			Linnaeus, 1761			Y		Y	Y
960	Animalia	Arthropoda	Insecta	Hemiptera	Aphididae	Schizaphis	scirpicola			Hille Ris Lambers, 1960		BOLD:AAD1238	Y		Y	Y	BOLD:AAD1238
961	Animalia	Arthropoda	Insecta	Hemiptera	Belostomatidae	Belostoma	flumineum			Say, 1832			Y		Y	Y
962	Animalia	Arthropoda	Insecta	Hemiptera	Berytidae	Neoneides	muticus			Say, 1832			Y	Y
963	Animalia	Arthropoda	Insecta	Hemiptera	Cercopidae	Aphrophora	alni			Fallén, 1805			Y	Y
964	Animalia	Arthropoda	Insecta	Hemiptera	Cercopidae	Aphrophora	cribrata			Walker, 1851			Y	Y
965	Animalia	Arthropoda	Insecta	Hemiptera	Cercopidae	Clastoptera	obtusa			Say, 1825			Y	Y	Y	Y
966	Animalia	Arthropoda	Insecta	Hemiptera	Cercopidae	Lepyronia	quadrangularis			Say, 1825			Y	Y	Y	Y
967	Animalia	Arthropoda	Insecta	Hemiptera	Cercopidae	Neophilaenus	lineatus			Linnaeus, 1758			Y	Y
968	Animalia	Arthropoda	Insecta	Hemiptera	Cercopidae	Philaenus	spumarius	quadrimaculatus		Schrank, 1776			Y		Y	Y
969	Animalia	Arthropoda	Insecta	Hemiptera	Cercopidae	Philaenus	spumarius			Linnaeus, 1758			Y	Y
970	Animalia	Arthropoda	Insecta	Hemiptera	Cicadellidae	Agallia	quadripunctata			Oman 1933		BOLD:AAG2899	Y		Y	Y	BOLD:AAG2899
971	Animalia	Arthropoda	Insecta	Hemiptera	Cicadellidae	Agallia	sp.						N	Y
972	Animalia	Arthropoda	Insecta	Hemiptera	Cicadellidae	Agalliopsis	ancistra			Oman 1970			Y	Y
973	Animalia	Arthropoda	Insecta	Hemiptera	Cicadellidae	Agalliopsis	sp.						N	Y
974	Animalia	Arthropoda	Insecta	Hemiptera	Cicadellidae	Anoscopus	flavostriatus			Donovan, 1799			Y		Y	Y
975	Animalia	Arthropoda	Insecta	Hemiptera	Cicadellidae	Anoscopus	flavostrigata			Donovan, 1799			Y	Y
976	Animalia	Arthropoda	Insecta	Hemiptera	Cicadellidae	Aphrodes	sp.						N	Y
977	Animalia	Arthropoda	Insecta	Hemiptera	Cicadellidae	Arboridia	sp.						N	Y
978	Animalia	Arthropoda	Insecta	Hemiptera	Cicadellidae	Athysansus	argentarius			Metcalf, 1955			Y	Y
979	Animalia	Arthropoda	Insecta	Hemiptera	Cicadellidae	Balclutha	sp.						N	Y
980	Animalia	Arthropoda	Insecta	Hemiptera	Cicadellidae	Ceratagallia	sp.						N	Y
981	Animalia	Arthropoda	Insecta	Hemiptera	Cicadellidae	Chlorotettix	unicolor			Fitch 1851			Y		Y	Y
982	Animalia	Arthropoda	Insecta	Hemiptera	Cicadellidae	Cicadula	melanogaster			Provancher 1872			Y	Y
983	Animalia	Arthropoda	Insecta	Hemiptera	Cicadellidae	Colladonus	clitellarius			Say, 1830		BOLD:ACV9851	Y	Y	Y	Y	BOLD:ACV9851
984	Animalia	Arthropoda	Insecta	Hemiptera	Cicadellidae	Cosmotettix	cf. bilineatus						N	Y
985	Animalia	Arthropoda	Insecta	Hemiptera	Cicadellidae	Cuerna	striata			Walker, 1851			Y	Y
986	Animalia	Arthropoda	Insecta	Hemiptera	Cicadellidae	Deltocephalus	pulicaris			Fallén 1806		BOLD:AAY8918	Y		Y	Y	BOLD:AAY8918
987	Animalia	Arthropoda	Insecta	Hemiptera	Cicadellidae	Dicraneura	sp.						N	Y
988	Animalia	Arthropoda	Insecta	Hemiptera	Cicadellidae	Dikraneura	mali			Provancher, 1890		BOLD:ABA5842	Y		Y	Y	BOLD:ABA5842
989	Animalia	Arthropoda	Insecta	Hemiptera	Cicadellidae	Dikrella	cruentata			Gillette, 1898		BOLD:AAV0158	Y		Y	Y	BOLD:AAV0158
990	Animalia	Arthropoda	Insecta	Hemiptera	Cicadellidae	Diplocolenus	abdominalis			Fabricius 1803		BOLD:AAG2897	Y	Y	Y	Y	BOLD:AAG2897
991	Animalia	Arthropoda	Insecta	Hemiptera	Cicadellidae	Doratura	stylata			Boheman, 1847		BOLD:AAG8821	Y	Y	Y	Y	BOLD:AAG8821
992	Animalia	Arthropoda	Insecta	Hemiptera	Cicadellidae	Draeculacephala	constricta			Davidson et DeLong, 1943			Y		Y	Y
993	Animalia	Arthropoda	Insecta	Hemiptera	Cicadellidae	Draeculacephala	sp.						N	Y
994	Animalia	Arthropoda	Insecta	Hemiptera	Cicadellidae	Elymana	caduca			DeLong 1936			Y	Y
995	Animalia	Arthropoda	Insecta	Hemiptera	Cicadellidae	Empoasca	coccinea			Fitch, 1851		BOLD:ABA5764	Y		Y	Y	BOLD:ABA5764
996	Animalia	Arthropoda	Insecta	Hemiptera	Cicadellidae	Empoasca	decipiens			Zachvatkin, 1935		BOLD:AAY6741	Y		Y	Y	BOLD:AAY6741
997	Animalia	Arthropoda	Insecta	Hemiptera	Cicadellidae	Empoasca	fabae			Cardoso, 1974		BOLD:AAG2868|BOLD:AAG2873	Y		Y	Y	BOLD:AAG2868|BOLD:AAG2873
998	Animalia	Arthropoda	Insecta	Hemiptera	Cicadellidae	Empoasca	sp.						N	Y
999	Animalia	Arthropoda	Insecta	Hemiptera	Cicadellidae	Erasmoneura	nigra			Gillette, 1898			Y	Y
1000	Animalia	Arthropoda	Insecta	Hemiptera	Cicadellidae	Eratoneura	certa			Beamer, 1932		BOLD:ABA5787	Y		Y	Y	BOLD:ABA5787
1001	Animalia	Arthropoda	Insecta	Hemiptera	Cicadellidae	Eratoneura	flexibilis			Knull, 1949		BOLD:AAZ8495|BOLD:AAZ8496	Y		Y	Y	BOLD:AAZ8495|BOLD:AAZ8496
1002	Animalia	Arthropoda	Insecta	Hemiptera	Cicadellidae	Errastunus	ocellaris			Fallén, 1806		BOLD:AAG8839	Y		Y	Y	BOLD:AAG8839
1003	Animalia	Arthropoda	Insecta	Hemiptera	Cicadellidae	Erythridula	dunni			Hepner, 1976		BOLD:ABA5786	Y		Y	Y	BOLD:ABA5786
1004	Animalia	Arthropoda	Insecta	Hemiptera	Cicadellidae	Erythridula	scytha			Auten & Johnson, 1936		BOLD:AAN8412	Y		Y	Y	BOLD:AAN8412
1005	Animalia	Arthropoda	Insecta	Hemiptera	Cicadellidae	Erythridula	tenuispica			Beamer, 1930		BOLD:ABA5830	Y		Y	Y	BOLD:ABA5830
1006	Animalia	Arthropoda	Insecta	Hemiptera	Cicadellidae	Erythridula	wysongi			Ross & DeLong, 1953		BOLD:AAN8287|BOLD:ABZ1306	Y		Y	Y	BOLD:AAN8287|BOLD:ABZ1306
1007	Animalia	Arthropoda	Insecta	Hemiptera	Cicadellidae	Erythroneura	aza			Robinson, 1924		BOLD:AAY6747	Y		Y	Y	BOLD:AAY6747
1008	Animalia	Arthropoda	Insecta	Hemiptera	Cicadellidae	Erythroneura	bakeri			Dmitriev & Dietrich, 2007		BOLD:AAV0161	Y		Y	Y	BOLD:AAV0161
1009	Animalia	Arthropoda	Insecta	Hemiptera	Cicadellidae	Erythroneura	elegans			McAtee, 1920		BOLD:ABA5798	Y		Y	Y	BOLD:ABA5798
1010	Animalia	Arthropoda	Insecta	Hemiptera	Cicadellidae	Erythroneura	ontari			Robinson, 1924		BOLD:ABA5810	Y		Y	Y	BOLD:ABA5810
1011	Animalia	Arthropoda	Insecta	Hemiptera	Cicadellidae	Erythroneura	rubrella			McAtee, 1920		BOLD:AAV0164|BOLD:ACC8414	Y		Y	Y	BOLD:AAV0164|BOLD:ACC8414
1012	Animalia	Arthropoda	Insecta	Hemiptera	Cicadellidae	Erythroneura	sp.						N	Y
1013	Animalia	Arthropoda	Insecta	Hemiptera	Cicadellidae	Erythroneura	tricincta			Fitch, 1851		BOLD:AAY6738|BOLD:AAY6751	Y	Y	Y	Y	BOLD:AAY6738|BOLD:AAY6751
1014	Animalia	Arthropoda	Insecta	Hemiptera	Cicadellidae	Erythroneura	vitifex			Fitch, 1856		BOLD:AAY6742|BOLD:ACQ8506	Y		Y	Y	BOLD:AAY6742|BOLD:ACQ8506
1015	Animalia	Arthropoda	Insecta	Hemiptera	Cicadellidae	Erythroneura	vitis			Harris, 1831			Y	Y
1016	Animalia	Arthropoda	Insecta	Hemiptera	Cicadellidae	Erythroneura	vulnerata			Fitch, 1851		BOLD:AAO8361|BOLD:AAY6752|BOLD:ABA5772|BOLD:ABY9043|BOLD:ABY9046|BOLD:ACQ3943|BOLD:ACV2800|BOLD:ACV2885|BOLD:ACV2886	Y	Y	Y	Y	BOLD:AAO8361|BOLD:AAY6752|BOLD:ABA5772|BOLD:ABY9043|BOLD:ABY9046|BOLD:ACQ3943|BOLD:ACV2800|BOLD:ACV2885|BOLD:ACV2886
1017	Animalia	Arthropoda	Insecta	Hemiptera	Cicadellidae	Eupteryx	atropunctata			Goeze, 1778		BOLD:AAG2869	Y	Y	Y	Y	BOLD:AAG2869
1018	Animalia	Arthropoda	Insecta	Hemiptera	Cicadellidae	Eupteryx	flavoscuta			Gillette, 1898		BOLD:ABA5805	Y		Y	Y	BOLD:ABA5805
1019	Animalia	Arthropoda	Insecta	Hemiptera	Cicadellidae	Fieberiella	florii			Stål, 1864			Y	Y
1020	Animalia	Arthropoda	Insecta	Hemiptera	Cicadellidae	Forcipata	acclina			DeLong & Caldwell, 1936			Y		Y	Y
1021	Animalia	Arthropoda	Insecta	Hemiptera	Cicadellidae	Forcipata	loca			DeLong & Caldwell, 1936		BOLD:ACC8165	Y	Y	Y	Y	BOLD:ACC8165
1022	Animalia	Arthropoda	Insecta	Hemiptera	Cicadellidae	Graphocephala	coccinea			Forster, 1771			Y	Y
1023	Animalia	Arthropoda	Insecta	Hemiptera	Cicadellidae	Graphocephala	sp.						N	Y
1024	Animalia	Arthropoda	Insecta	Hemiptera	Cicadellidae	Gyponana	sp.						N	Y
1025	Animalia	Arthropoda	Insecta	Hemiptera	Cicadellidae	Hymetta	balteata			McAtee, 1919		BOLD:AAV0157	Y	Y	Y	Y	BOLD:AAV0157
1026	Animalia	Arthropoda	Insecta	Hemiptera	Cicadellidae	Jikradia	olitoria			Say, 1830			Y	Y
1027	Animalia	Arthropoda	Insecta	Hemiptera	Cicadellidae	Latalus	ocellaris			De Long & Sleesman, 1929			Y	Y
1028	Animalia	Arthropoda	Insecta	Hemiptera	Cicadellidae	Macropsis	basalis			Van Duzee, 1889		BOLD:ACC9200	Y		Y	Y	BOLD:ACC9200
1029	Animalia	Arthropoda	Insecta	Hemiptera	Cicadellidae	Macrosteles	quadrilineatus			Forbes, 1885		BOLD:AAA9422	Y		Y	Y	BOLD:AAA9422
1030	Animalia	Arthropoda	Insecta	Hemiptera	Cicadellidae	Macrosteles	sp.						N	Y
1031	Animalia	Arthropoda	Insecta	Hemiptera	Cicadellidae	Macrosteles	variatus			Fallén, 1806		BOLD:AAV0236	Y		Y	Y	BOLD:AAV0236
1032	Animalia	Arthropoda	Insecta	Hemiptera	Cicadellidae	Neokolla	hieroglyphica			Say, 1830		BOLD:AAN8418	Y	Y	Y	Y	BOLD:AAN8418
1033	Animalia	Arthropoda	Insecta	Hemiptera	Cicadellidae	Oncopsis	sobria			Walker, 1851		BOLD:ACI7197	Y		Y	Y	BOLD:ACI7197
1034	Animalia	Arthropoda	Insecta	Hemiptera	Cicadellidae	Osbornellus	limosus			DeLong, 1941			Y	Y
1035	Animalia	Arthropoda	Insecta	Hemiptera	Cicadellidae	Penthimia	americana			Fitch, 1851			Y		Y	Y
1036	Animalia	Arthropoda	Insecta	Hemiptera	Cicadellidae	Scaphoideus	major			Osborn, 1900		BOLD:AAY6734	Y		Y	Y	BOLD:AAY6734
1037	Animalia	Arthropoda	Insecta	Hemiptera	Cicadellidae	Scaphoideus	sp.						N	Y
1038	Animalia	Arthropoda	Insecta	Hemiptera	Cicadellidae	Scaphytopius	sp.						N	Y
1039	Animalia	Arthropoda	Insecta	Hemiptera	Cicadellidae	Sorhoanus	pascuellus			Fallén, 1826			Y	Y
1040	Animalia	Arthropoda	Insecta	Hemiptera	Cicadellidae	Typhlocyba	arsinoe			McAtee, 1926			Y	Y
1041	Animalia	Arthropoda	Insecta	Hemiptera	Cicadellidae	Typhlocyba	niobe			McAtee, 1926		BOLD:ABA5877	Y		Y	Y	BOLD:ABA5877
1042	Animalia	Arthropoda	Insecta	Hemiptera	Cicadellidae	Typhlocyba	pomaria			McAtee, 1926		BOLD:AAF5980	Y		Y	Y	BOLD:AAF5980
1043	Animalia	Arthropoda	Insecta	Hemiptera	Cicadellidae	Zonocyba	hockingensis			Knull, 1945		BOLD:ACV8488	Y		Y	Y	BOLD:ACV8488
1044	Animalia	Arthropoda	Insecta	Hemiptera	Cicadidae	Tibicen	canicularis			Harris, 1841			Y	Y
1045	Animalia	Arthropoda	Insecta	Hemiptera	Clastopteridae	Clastoptera	proteus			Fitch, 1851			Y	Y	Y	Y
1046	Animalia	Arthropoda	Insecta	Hemiptera	Corixidae	Palmacorixa	buenoi			Abbott, 1913			Y		Y	Y
1047	Animalia	Arthropoda	Insecta	Hemiptera	Corixidae	Sehirus	cinctus			Palisot, 1811			Y	Y
1048	Animalia	Arthropoda	Insecta	Hemiptera	Corixidae	Trichocorixa	borealis			Sailer, 1948			Y	Y	Y	Y
1049	Animalia	Arthropoda	Insecta	Hemiptera	Corixidae	Trichocorixa	sexcincta			Champion, 1901			Y	Y
1050	Animalia	Arthropoda	Insecta	Hemiptera	Cydnidae	Sehirus	cinctus cinctus			Palisot, 1811			Y		Y	Y
1051	Animalia	Arthropoda	Insecta	Hemiptera	Cymidae	Cymus	angustatus			Stål, 1874			Y	Y
1052	Animalia	Arthropoda	Insecta	Hemiptera	Delphacidae	Delphacodes	sp.						N	Y
1053	Animalia	Arthropoda	Insecta	Hemiptera	Delphacidae	Javasella	pellucida			Fabricius, 1794			Y	Y
1054	Animalia	Arthropoda	Insecta	Hemiptera	Delphacidae	Kosswigianella	lutulenta			Van Duzee, 1894			Y	Y
1055	Animalia	Arthropoda	Insecta	Hemiptera	Delphacidae	Liburniella	ornata			Stål, 1862			Y		Y	Y
1056	Animalia	Arthropoda	Insecta	Hemiptera	Delphacidae	Megamelus	lunatus			Beamer, 1955			Y	Y
1057	Animalia	Arthropoda	Insecta	Hemiptera	Delphacidae	Pissonotus	basalis			Van Duzee, 1897			Y	Y
1058	Animalia	Arthropoda	Insecta	Hemiptera	Derbidae	Cedusa	incisa			Metcalf, 1923			Y	Y
1059	Animalia	Arthropoda	Insecta	Hemiptera	Dictyopharidae	Scolops	sulcipes			Say, 1825			Y	Y
1060	Animalia	Arthropoda	Insecta	Hemiptera	Flatidae	Metcalfa	pruinosa			Say, 1830			Y	Y
1061	Animalia	Arthropoda	Insecta	Hemiptera	Gelastocoridae	Gelastocoris	oculatus			Fabricius, 1798			Y	Y
1062	Animalia	Arthropoda	Insecta	Hemiptera	Gerridae	Aquarius	remigis			Say, 1832			Y	Y
1063	Animalia	Arthropoda	Insecta	Hemiptera	Issidae	Acanalonia	bivittata			Say, 1825			Y	Y
1064	Animalia	Arthropoda	Insecta	Hemiptera	Lygaeidae	Kleidocerys	resedae	geminatus		Say, 1832			Y		Y	Y
1065	Animalia	Arthropoda	Insecta	Hemiptera	Lygaeidae	Lygaeus	kalmii			Stål, 1874			Y	Y
1066	Animalia	Arthropoda	Insecta	Hemiptera	Lygaeidae	Nysius	sp.						N	Y
1067	Animalia	Arthropoda	Insecta	Hemiptera	Membracidae	Atymna	helena			Woodruff, 1915		BOLD:AAY9905	Y		Y	Y	BOLD:AAY9905
1068	Animalia	Arthropoda	Insecta	Hemiptera	Membracidae	Campylenchia	latipes			Say, 1824			Y	Y
1069	Animalia	Arthropoda	Insecta	Hemiptera	Membracidae	Ceresa	sp.						N	Y
1070	Animalia	Arthropoda	Insecta	Hemiptera	Membracidae	Cyrtolobus	sp.						N	Y
1071	Animalia	Arthropoda	Insecta	Hemiptera	Membracidae	Enchenopa	binotata			Say, 1824			Y	Y
1072	Animalia	Arthropoda	Insecta	Hemiptera	Membracidae	Entylia	carinata			Forster, 1771			Y	Y
1073	Animalia	Arthropoda	Insecta	Hemiptera	Membracidae	Micrutalis	calva			Say, 1831			Y	Y
1074	Animalia	Arthropoda	Insecta	Hemiptera	Membracidae	Publilia	concava			Say, 1824			Y	Y	Y	Y
1075	Animalia	Arthropoda	Insecta	Hemiptera	Membracidae	Telamona	decorata			Ball, 1903			Y	Y
1076	Animalia	Arthropoda	Insecta	Hemiptera	Miridae	Adelphocoris	lineolatus			Goeze, 1778			Y	Y	Y	Y
1077	Animalia	Arthropoda	Insecta	Hemiptera	Miridae	Amblytylus	nasutus			Kirschbaum, 1856			Y	Y
1078	Animalia	Arthropoda	Insecta	Hemiptera	Miridae	Capsus	ater			Linnaeus, 1758			Y	Y
1079	Animalia	Arthropoda	Insecta	Hemiptera	Miridae	Ceratocapsus	sp.						N	Y
1080	Animalia	Arthropoda	Insecta	Hemiptera	Miridae	Chlamydatus	associatus			Uhler, 1872		BOLD:AAF3365	Y		Y	Y	BOLD:AAF3365
1081	Animalia	Arthropoda	Insecta	Hemiptera	Miridae	Chlamydatus	sp.						N	Y
1082	Animalia	Arthropoda	Insecta	Hemiptera	Miridae	Collaria	meilleurii			Provancher, 1872			Y		Y	Y
1083	Animalia	Arthropoda	Insecta	Hemiptera	Miridae	Criocoris	saliens			Reuter, 1876			Y	Y
1084	Animalia	Arthropoda	Insecta	Hemiptera	Miridae	Deraeocoris	sp.						N	Y
1085	Animalia	Arthropoda	Insecta	Hemiptera	Miridae	Fulvius	slateri			Wheeler, 1977			Y		Y	Y
1086	Animalia	Arthropoda	Insecta	Hemiptera	Miridae	Halticus	sp.						N	Y
1087	Animalia	Arthropoda	Insecta	Hemiptera	Miridae	Heterocordylus	malinus			Slingerland, 1909			Y	Y
1088	Animalia	Arthropoda	Insecta	Hemiptera	Miridae	Leptopterna	dolabrata			Linnaeus, 1758			Y	Y	Y	Y
1089	Animalia	Arthropoda	Insecta	Hemiptera	Miridae	Litomiris	sp.						N	Y
1090	Animalia	Arthropoda	Insecta	Hemiptera	Miridae	Lopidea	sp.						N	Y
1091	Animalia	Arthropoda	Insecta	Hemiptera	Miridae	Lygidea	sp.						N	Y
1092	Animalia	Arthropoda	Insecta	Hemiptera	Miridae	Lygocoris	pabulinus			Linnaeus, 1761		BOLD:AAB2218	Y		Y	Y	BOLD:AAB2218
1093	Animalia	Arthropoda	Insecta	Hemiptera	Miridae	Lygus	sp.						N	Y
1094	Animalia	Arthropoda	Insecta	Hemiptera	Miridae	Nabicula	subcoleoptrata			Kirby, 1837			Y	Y
1095	Animalia	Arthropoda	Insecta	Hemiptera	Miridae	Nabis	roseipennis			Reuter, 1872			Y	Y
1096	Animalia	Arthropoda	Insecta	Hemiptera	Miridae	Neolygus	sp.						N	Y
1097	Animalia	Arthropoda	Insecta	Hemiptera	Miridae	Orthocephalus	sp.						N	Y
1098	Animalia	Arthropoda	Insecta	Hemiptera	Miridae	Orthops	scutellatus			Uhler, 1877			Y		Y	Y
1099	Animalia	Arthropoda	Insecta	Hemiptera	Miridae	Pagasa	fusca			Stein, 1857			Y	Y
1100	Animalia	Arthropoda	Insecta	Hemiptera	Miridae	Paraproba	capitata			Van Duzee, 1912			Y	Y
1101	Animalia	Arthropoda	Insecta	Hemiptera	Miridae	Phoenicocoris	strobicola			Knight, 1923		BOLD:AAH8507	Y		Y	Y	BOLD:AAH8507
1102	Animalia	Arthropoda	Insecta	Hemiptera	Miridae	Phytocoris	sp.						N	Y
1103	Animalia	Arthropoda	Insecta	Hemiptera	Miridae	Pithanus	maerkelii			Herrich-Schaeffer, 1838			Y	Y
1104	Animalia	Arthropoda	Insecta	Hemiptera	Miridae	Plagiognathus	sp.						N	Y
1105	Animalia	Arthropoda	Insecta	Hemiptera	Miridae	Poecilocapsus	lineatus			Fabricius, 1798			Y	Y
1106	Animalia	Arthropoda	Insecta	Hemiptera	Miridae	Prepops	sp.						N	Y
1107	Animalia	Arthropoda	Insecta	Hemiptera	Miridae	Slaterocoris	sp.						N	Y
1108	Animalia	Arthropoda	Insecta	Hemiptera	Miridae	Stenodema	trispinosa			Reuter, 1904			Y	Y
1109	Animalia	Arthropoda	Insecta	Hemiptera	Miridae	Stenodema	vicinum			Provancher, 1872			Y	Y
1110	Animalia	Arthropoda	Insecta	Hemiptera	Miridae	Stenotus	binotatus			Fabricius, 1794			Y	Y	Y	Y
1111	Animalia	Arthropoda	Insecta	Hemiptera	Miridae	Taedia	sp.						N	Y
1112	Animalia	Arthropoda	Insecta	Hemiptera	Nabidae	Hoplistoscelis	sordidus			Reuter, 1872			Y		Y	Y
1113	Animalia	Arthropoda	Insecta	Hemiptera	Nabidae	Nabis	rufusculus			Reuter, 1872			Y	Y	Y	Y
1114	Animalia	Arthropoda	Insecta	Hemiptera	Notonectidae	Notonecta	undulata			Say, 1832			Y		Y	Y
1115	Animalia	Arthropoda	Insecta	Hemiptera	Oxycarenidae	Crophius	disconotus			Say, 1832			Y	Y
1116	Animalia	Arthropoda	Insecta	Hemiptera	Pachygronthidae	Phlegyas	abbreviatus			Uhler, 1876			Y		Y	Y
1117	Animalia	Arthropoda	Insecta	Hemiptera	Pentatomidae	Acrosternum	hilare			Say, 1832			Y	Y	Y	Y
1118	Animalia	Arthropoda	Insecta	Hemiptera	Pentatomidae	Banasa	calva			Say, 1832			Y	Y
1119	Animalia	Arthropoda	Insecta	Hemiptera	Pentatomidae	Banasa	dimidiata			Say, 1832			Y	Y
1120	Animalia	Arthropoda	Insecta	Hemiptera	Pentatomidae	Brochymena	quadripustulata			Fabricius, 1775			Y	Y
1121	Animalia	Arthropoda	Insecta	Hemiptera	Pentatomidae	Cosmopepla	lintneriana			Kirkaldy, 1909			Y	Y
1122	Animalia	Arthropoda	Insecta	Hemiptera	Pentatomidae	Euschistus	tristigmus	luridus		Dallas, 1851			Y	Y
1123	Animalia	Arthropoda	Insecta	Hemiptera	Pentatomidae	Neottiglossa	undata			Say, 1832			Y		Y	Y
1124	Animalia	Arthropoda	Insecta	Hemiptera	Pentatomidae	Parabrochymena	arborea			Say,1825			Y	Y
1125	Animalia	Arthropoda	Insecta	Hemiptera	Pentatomidae	Picromerus	bidens			Linnaeus, 1758			Y	Y
1126	Animalia	Arthropoda	Insecta	Hemiptera	Pentatomidae	Podisus	maculiventris			Say, 1832			Y	Y
1127	Animalia	Arthropoda	Insecta	Hemiptera	Phymatidae	Phymata	americana			Melin, 1930			Y	Y
1128	Animalia	Arthropoda	Insecta	Hemiptera	Phymatidae	Piesma	cinerum			Say, 1832			Y	Y
1129	Animalia	Arthropoda	Insecta	Hemiptera	Psyllidae	Pachypsylla	celtidismamma			Fletcher, 1882			Y	Y
1130	Animalia	Arthropoda	Insecta	Hemiptera	Psyllidae	Psyllopsis	fraxinicola			Foerster, 1848			Y	Y
1131	Animalia	Arthropoda	Insecta	Hemiptera	Reduviidae	Empicornis	errabundus			Say, 1832			Y	Y
1132	Animalia	Arthropoda	Insecta	Hemiptera	Reduviidae	Sinea	diadema			Fabricius, 1776			Y		Y	Y
1133	Animalia	Arthropoda	Insecta	Hemiptera	Reduviidae	Zelus	luridus			Stål, 1862			Y	Y	Y	Y
1134	Animalia	Arthropoda	Insecta	Hemiptera	Reduviidae	Zelus	tetracanthus			Stål, 1862			Y	Y
1135	Animalia	Arthropoda	Insecta	Hemiptera	Rhopalidae	Arhyssus	sp.						N	Y
1136	Animalia	Arthropoda	Insecta	Hemiptera	Rhopalidae	Harmostes	reflexulus			Say, 1832			Y	Y	Y	Y
1137	Animalia	Arthropoda	Insecta	Hemiptera	Rhopalidae	Stictopleurus	punctiventris			Dallas, 1852			Y	Y	Y	Y
1138	Animalia	Arthropoda	Insecta	Hemiptera	Rhyparochromidae	Ligyrocoris	diffusus			Uhler, 1871			Y	Y
1139	Animalia	Arthropoda	Insecta	Hemiptera	Rhyparochromidae	Megalonotus	sabulicola			Thomson, 1870			Y	Y
1140	Animalia	Arthropoda	Insecta	Hemiptera	Rhyparochromidae	Sphragisticus	nebulosus			Fallén, 1807			Y	Y
1141	Animalia	Arthropoda	Insecta	Hemiptera	Saldidae	Saldula	confluenta			Say, 1832			Y	Y
1142	Animalia	Arthropoda	Insecta	Hemiptera	Saldidae	Saldula	pallipes			Fabricius, 1794			Y	Y
1143	Animalia	Arthropoda	Insecta	Hemiptera	Saldidae	Saldula	saltatoria			Linnaeus, 1758			Y	Y
1144	Animalia	Arthropoda	Insecta	Hemiptera	Thyreocoridae	Corimelaena	pulicaria			Germar, 1839			Y	Y
1145	Animalia	Arthropoda	Insecta	Hemiptera	Thyreocoridae	Galgupha	atra			Amyot and Serville, 1843			Y	Y
1146	Animalia	Arthropoda	Insecta	Hemiptera	Tingidae	Corythucha	marmorata			Uhler, 1878			Y	Y	Y	Y
1147	Animalia	Arthropoda	Insecta	Hemiptera	Tingidae	Corythucha	sp.						N	Y
1148	Animalia	Arthropoda	Insecta	Hemiptera	Tingidae	Dictyla	echii			Schrank, 1782			Y	Y
1149	Animalia	Arthropoda	Insecta	Hymenoptera	Andrenidae	Andrena	andrenoides			Cresson, 1878			Y	Y
1150	Animalia	Arthropoda	Insecta	Hymenoptera	Andrenidae	Andrena	barbilabris			Kirby, 1802		BOLD:AAB4998	Y		Y	Y	BOLD:AAB4998
1151	Animalia	Arthropoda	Insecta	Hymenoptera	Andrenidae	Andrena	canadensis			Dalla Torre, 1896			Y	Y
1152	Animalia	Arthropoda	Insecta	Hymenoptera	Andrenidae	Andrena	carlini			Cockerell, 1901			Y	Y
1153	Animalia	Arthropoda	Insecta	Hymenoptera	Andrenidae	Andrena	erythrogaster			Ashmead, 1890			Y	Y
1154	Animalia	Arthropoda	Insecta	Hymenoptera	Andrenidae	Andrena	hirticincta			Provancher, 1888			Y	Y
1155	Animalia	Arthropoda	Insecta	Hymenoptera	Andrenidae	Andrena	nasonii			Robertson, 1895			Y	Y
1156	Animalia	Arthropoda	Insecta	Hymenoptera	Andrenidae	Andrena	obscuripennis			Smith, 1853			Y	Y
1157	Animalia	Arthropoda	Insecta	Hymenoptera	Andrenidae	Andrena	rudbeckiae			Robertson, 1891			Y	Y
1158	Animalia	Arthropoda	Insecta	Hymenoptera	Andrenidae	Andrena	solidaginis			Robertson, 1893			N	Y
1159	Animalia	Arthropoda	Insecta	Hymenoptera	Andrenidae	Andrena	sp.						N	Y
1160	Animalia	Arthropoda	Insecta	Hymenoptera	Andrenidae	Andrena	thaspii			Graenicher, 1903			Y	Y
1161	Animalia	Arthropoda	Insecta	Hymenoptera	Andrenidae	Andrena	wilkella			Kirby, 1802			Y	Y
1162	Animalia	Arthropoda	Insecta	Hymenoptera	Andrenidae	Perdita	octomaculata			Say, 1824			Y	Y
1163	Animalia	Arthropoda	Insecta	Hymenoptera	Andrenidae	Pseudopanurgus	nebrascensis			Crawford, 1903			Y	Y
1164	Animalia	Arthropoda	Insecta	Hymenoptera	Anthophoridae	Anthophora	furcata			Panzer, 1798			Y	Y
1165	Animalia	Arthropoda	Insecta	Hymenoptera	Anthophoridae	Ceratina	calcarata			Robertson, 1900			Y	Y
1166	Animalia	Arthropoda	Insecta	Hymenoptera	Anthophoridae	Ceratina	dupla			Say, 1837			Y	Y
1167	Animalia	Arthropoda	Insecta	Hymenoptera	Anthophoridae	Ceratina	sp.						N	Y
1168	Animalia	Arthropoda	Insecta	Hymenoptera	Anthophoridae	Melissodes	desponsa			Smith, 1854			Y	Y
1169	Animalia	Arthropoda	Insecta	Hymenoptera	Apidae	Apis	mellifera			Linnaeus, 1758			Y	Y
1170	Animalia	Arthropoda	Insecta	Hymenoptera	Apidae	Bombus	bimaculatus			Cresson, 1863			Y	Y
1171	Animalia	Arthropoda	Insecta	Hymenoptera	Apidae	Bombus	borealis			Kirby, 1837			Y	Y
1172	Animalia	Arthropoda	Insecta	Hymenoptera	Apidae	Bombus	griseocollis			DeGeer, 1773			Y	Y
1173	Animalia	Arthropoda	Insecta	Hymenoptera	Apidae	Bombus	impatiens			Cresson, 1863		BOLD:ABZ2516	Y	Y	Y	Y	BOLD:ABZ2516
1174	Animalia	Arthropoda	Insecta	Hymenoptera	Apidae	Bombus	perplexus			Cresson, 1863			Y	Y
1175	Animalia	Arthropoda	Insecta	Hymenoptera	Apidae	Bombus	rufocinctus			Cresson, 1863			Y	Y	Y	Y
1176	Animalia	Arthropoda	Insecta	Hymenoptera	Apidae	Bombus	vagans			Smith, 1854			Y	Y
1177	Animalia	Arthropoda	Insecta	Hymenoptera	Apidae	Ceratina	mikmaqi			Rehan and Sheffield, 2011		BOLD:AAA2368	Y	Y	Y	Y	BOLD:AAA2368
1178	Animalia	Arthropoda	Insecta	Hymenoptera	Apidae	Melissodes	boltoniae			Robertson, 1905			N	Y
1179	Animalia	Arthropoda	Insecta	Hymenoptera	Apidae	Melissodes	communis			Cresson, 1878			Y	Y
1180	Animalia	Arthropoda	Insecta	Hymenoptera	Apidae	Melissodes	druriella			Kirby, 1802			Y	Y
1181	Animalia	Arthropoda	Insecta	Hymenoptera	Apidae	Melissodes	illata			Lovell & Cockerell, 1906			Y	Y
1182	Animalia	Arthropoda	Insecta	Hymenoptera	Apidae	Melissodes	subillata			LaBerge, 1961			Y	Y
1183	Animalia	Arthropoda	Insecta	Hymenoptera	Apidae	Melissodes	trinodis			Robertson, 1901			Y	Y
1184	Animalia	Arthropoda	Insecta	Hymenoptera	Apidae	Melissodes	wheeleri			Cockerell, 1906			N	Y
1185	Animalia	Arthropoda	Insecta	Hymenoptera	Apidae	Nomada	articulata			Smith, 1854			Y	Y
1186	Animalia	Arthropoda	Insecta	Hymenoptera	Apidae	Nomada	bella			Cresson, 1863		BOLD:ABZ2527	Y		Y	Y	BOLD:ABZ2527
1187	Animalia	Arthropoda	Insecta	Hymenoptera	Apidae	Nomada	bethunei			Cockerell, 1903			Y	Y
1188	Animalia	Arthropoda	Insecta	Hymenoptera	Apidae	Nomada	cressonii			Robertson, 1893			Y	Y
1189	Animalia	Arthropoda	Insecta	Hymenoptera	Apidae	Nomada	luteoloides			Robertson, 1895			Y	Y
1190	Animalia	Arthropoda	Insecta	Hymenoptera	Apidae	Nomada	pygmaea			Cresson, 1863		BOLD:ABZ6834	Y		Y	Y	BOLD:ABZ6834
1191	Animalia	Arthropoda	Insecta	Hymenoptera	Apidae	Nomada	subrutila			Lovell & Cockerell, 1905		BOLD:AAC5044	Y		Y	Y	BOLD:AAC5044
1192	Animalia	Arthropoda	Insecta	Hymenoptera	Apidae	Triepeolus	helianthi			Robertson, 1897			Y	Y
1193	Animalia	Arthropoda	Insecta	Hymenoptera	Apidae	Triepeolus	nigrihirtus			Mitchell, 1962			Y	Y
1194	Animalia	Arthropoda	Insecta	Hymenoptera	Apidae	Triepeolus	obliteratus			Graenicher, 1911			N	Y
1195	Animalia	Arthropoda	Insecta	Hymenoptera	Apidae	Triepeolus	simplex			Robertson, 1903			N	Y
1196	Animalia	Arthropoda	Insecta	Hymenoptera	Apidae	Xylocopa	virginiana			Linnaeus, 1771			Y	Y
1197	Animalia	Arthropoda	Insecta	Hymenoptera	Bethylidae	Parasierola	sp.						N	Y
1198	Animalia	Arthropoda	Insecta	Hymenoptera	Braconidae	Aphidius	ervi			Haliday, 1834		BOLD:AAA4188	Y		Y	Y	BOLD:AAA4188
1199	Animalia	Arthropoda	Insecta	Hymenoptera	Braconidae	Ascogaster	quadridentata			Wesmael, 1835			Y		Y	Y
1200	Animalia	Arthropoda	Insecta	Hymenoptera	Braconidae	Asobara	rufescens			Foerster, 1862		BOLD:AAU8583	Y		Y	Y	BOLD:AAU8583
1201	Animalia	Arthropoda	Insecta	Hymenoptera	Braconidae	Asobara	sp.						N		Y	Y
1202	Animalia	Arthropoda	Insecta	Hymenoptera	Braconidae	Cotesia	xylina			Say, 1836		BOLD:AAA9386	Y		Y	Y	BOLD:AAA9386
1203	Animalia	Arthropoda	Insecta	Hymenoptera	Braconidae	Diaeretiella	rapae			McIntosh, 1855		BOLD:AAG1421	Y		Y	Y	BOLD:AAG1421
1204	Animalia	Arthropoda	Insecta	Hymenoptera	Braconidae	Diolcogaster	facetosa			Weed, 1888		BOLD:ABA5941	Y		Y	Y	BOLD:ABA5941
1205	Animalia	Arthropoda	Insecta	Hymenoptera	Braconidae	Ephedrus	lacertosus			Haliday, 1833		BOLD:ACW2698	Y		Y	Y	BOLD:ACW2698
1206	Animalia	Arthropoda	Insecta	Hymenoptera	Braconidae	Peristenus	sp.						N		Y	Y
1207	Animalia	Arthropoda	Insecta	Hymenoptera	Braconidae	Pholetesor	ornigis			Weed, 1887		BOLD:AAB0520	Y		Y	Y	BOLD:AAB0520
1208	Animalia	Arthropoda	Insecta	Hymenoptera	Braconidae	Pygostolus	falcatus			Nees,1834			Y		Y	Y
1209	Animalia	Arthropoda	Insecta	Hymenoptera	Braconidae	Spathius	elegans			Matthews, 1970			Y		Y	Y
1210	Animalia	Arthropoda	Insecta	Hymenoptera	Chalcididae	Conura	albifrons			Walsh, 1861		BOLD:AAG8371	Y		Y	Y	BOLD:AAG8371
1211	Animalia	Arthropoda	Insecta	Hymenoptera	Chrysididae	Cleptes	semiauratus			Linnaeus, 1761			Y	Y
1212	Animalia	Arthropoda	Insecta	Hymenoptera	Colletidae	Colletes	eulophi			Robertson, 1891			Y	Y
1213	Animalia	Arthropoda	Insecta	Hymenoptera	Colletidae	Colletes	hyalinus			Provancher, 1888			Y	Y
1214	Animalia	Arthropoda	Insecta	Hymenoptera	Colletidae	Colletes	mandibularis			Smith, 1853			Y	Y
1215	Animalia	Arthropoda	Insecta	Hymenoptera	Colletidae	Colletes	nudus			Robertson, 1898			Y	Y
1216	Animalia	Arthropoda	Insecta	Hymenoptera	Colletidae	Colletes	simulans			Cresson, 1868			Y	Y
1217	Animalia	Arthropoda	Insecta	Hymenoptera	Colletidae	Hylaeus	affinis			Smith, 1853			Y	Y
1218	Animalia	Arthropoda	Insecta	Hymenoptera	Colletidae	Hylaeus	cf. affinis						N	Y
1219	Animalia	Arthropoda	Insecta	Hymenoptera	Colletidae	Hylaeus	ellipticus			Kirby, 1827			Y	Y
1220	Animalia	Arthropoda	Insecta	Hymenoptera	Colletidae	Hylaeus	mesillae	cressoni		Cockerell, 1907			Y	Y
1221	Animalia	Arthropoda	Insecta	Hymenoptera	Colletidae	Hylaeus	modestus			Say, 1837			Y	Y
1222	Animalia	Arthropoda	Insecta	Hymenoptera	Colletidae	Hylaeus	sp.						N	Y
1223	Animalia	Arthropoda	Insecta	Hymenoptera	Crabronidae	Astata	unicolor			Say, 1824			Y	Y
1224	Animalia	Arthropoda	Insecta	Hymenoptera	Crabronidae	Cerceris	arelate			Banks, 1912			Y	Y
1225	Animalia	Arthropoda	Insecta	Hymenoptera	Crabronidae	Cerceris	atramontensis			Banks, 1913			Y	Y
1226	Animalia	Arthropoda	Insecta	Hymenoptera	Crabronidae	Cerceris	clypeata			Dahlbom, 1844			Y	Y
1227	Animalia	Arthropoda	Insecta	Hymenoptera	Crabronidae	Crossocerus	annulipes			Lepeletier et Brullé, 1834			Y	Y
1228	Animalia	Arthropoda	Insecta	Hymenoptera	Crabronidae	Crossocerus	barbipes			Dahlbom, 1845		BOLD:AAG3190	Y		Y	Y	BOLD:AAG3190
1229	Animalia	Arthropoda	Insecta	Hymenoptera	Crabronidae	Crossocerus	elongatulus			van der Linden, 1829			Y	Y
1230	Animalia	Arthropoda	Insecta	Hymenoptera	Crabronidae	Crossocerus	tarsatus	planipes		Fox, 1895			Y	Y
1231	Animalia	Arthropoda	Insecta	Hymenoptera	Crabronidae	Diodontus	minutus			Fabricius, 1793			Y	Y
1232	Animalia	Arthropoda	Insecta	Hymenoptera	Crabronidae	Ectemnius	cephalotes			Olivier, 1792			Y	Y
1233	Animalia	Arthropoda	Insecta	Hymenoptera	Crabronidae	Ectemnius	continuus			Fabricius, 1804			Y	Y
1234	Animalia	Arthropoda	Insecta	Hymenoptera	Crabronidae	Ectemnius	lapidarius			Panzer, 1804			Y	Y
1235	Animalia	Arthropoda	Insecta	Hymenoptera	Crabronidae	Ectemnius	maculosus			Gmelin, 1781			Y	Y
1236	Animalia	Arthropoda	Insecta	Hymenoptera	Crabronidae	Ectemnius	stirpicola			Packard, 1866			Y	Y
1237	Animalia	Arthropoda	Insecta	Hymenoptera	Crabronidae	Gorytes	atricornis			Packard,1867			Y	Y
1238	Animalia	Arthropoda	Insecta	Hymenoptera	Crabronidae	Gorytes	simillimus			Smith,1856			Y	Y
1239	Animalia	Arthropoda	Insecta	Hymenoptera	Crabronidae	Hoplisoides	nebulosus			Packard, 1867			Y	Y
1240	Animalia	Arthropoda	Insecta	Hymenoptera	Crabronidae	Lestica	confluenta			Say,1837			Y	Y
1241	Animalia	Arthropoda	Insecta	Hymenoptera	Crabronidae	Lestica	producticollis			Packard,1866			Y	Y
1242	Animalia	Arthropoda	Insecta	Hymenoptera	Crabronidae	Lyroda	subita			Say, 1837			Y	Y
1243	Animalia	Arthropoda	Insecta	Hymenoptera	Crabronidae	Mimesa	pauper			Packard, 1867			Y	Y
1244	Animalia	Arthropoda	Insecta	Hymenoptera	Crabronidae	Oxybelus	uniglumis			Linnaeus, 1758			Y	Y
1245	Animalia	Arthropoda	Insecta	Hymenoptera	Crabronidae	Passaloecus	cuspidatus			Smith, 1856		BOLD:AAG7762	Y	Y	Y	Y	BOLD:AAG7762
1246	Animalia	Arthropoda	Insecta	Hymenoptera	Crabronidae	Passaloecus	singularis			Dahlbom, 1844			Y	Y
1247	Animalia	Arthropoda	Insecta	Hymenoptera	Crabronidae	Pemphredon	inornata			Say, 1824			Y	Y
1248	Animalia	Arthropoda	Insecta	Hymenoptera	Crabronidae	Pemphredon	lethifer			Shuckard, 1837			Y	Y
1249	Animalia	Arthropoda	Insecta	Hymenoptera	Crabronidae	Philanthus	bilunatus			Cresson, 1865			Y	Y
1250	Animalia	Arthropoda	Insecta	Hymenoptera	Crabronidae	Pison	koreense			Radoszkowski, 1887			Y	Y
1251	Animalia	Arthropoda	Insecta	Hymenoptera	Crabronidae	Psen	monticola			Packard, 1867			Y	Y
1252	Animalia	Arthropoda	Insecta	Hymenoptera	Crabronidae	Rhopalum	coarctatum			Scopoli, 1763			Y	Y
1253	Animalia	Arthropoda	Insecta	Hymenoptera	Crabronidae	Saygorytes	phaleratus			Say, 1837			Y	Y
1254	Animalia	Arthropoda	Insecta	Hymenoptera	Crabronidae	Solierella	peckhami			Ashmead, 1897			Y	Y
1255	Animalia	Arthropoda	Insecta	Hymenoptera	Crabronidae	Stigmus	americanus			Packard, 1867			Y	Y			or fraternus
1256	Animalia	Arthropoda	Insecta	Hymenoptera	Crabronidae	Stigmus	fraternus			Say, 1824			Y	Y
1257	Animalia	Arthropoda	Insecta	Hymenoptera	Crabronidae	Tachysphex	antennatus			Fox, 1894[", 1893"]			Y	Y
1258	Animalia	Arthropoda	Insecta	Hymenoptera	Crabronidae	Tachysphex	pompiliformis			Panzer, 1803			Y	Y
1259	Animalia	Arthropoda	Insecta	Hymenoptera	Crabronidae	Trypoxylon	attenuatum			Smith, 1851			Y	Y
1260	Animalia	Arthropoda	Insecta	Hymenoptera	Crabronidae	Trypoxylon	carinatum			Say, 1837			Y	Y
1261	Animalia	Arthropoda	Insecta	Hymenoptera	Crabronidae	Trypoxylon	clavicerum			Lepeletier & Serville, 1828			Y	Y
1262	Animalia	Arthropoda	Insecta	Hymenoptera	Crabronidae	Trypoxylon	frigidum			Smith, 1856		BOLD:AAG3193	Y	Y	Y	Y	BOLD:AAG3193
1263	Animalia	Arthropoda	Insecta	Hymenoptera	Crabronidae	Trypoxylon	johnsoni			Fox, 1891			Y	Y
1264	Animalia	Arthropoda	Insecta	Hymenoptera	Crabronidae	Trypoxylon	lactitarse			Saussure, 1867			Y	Y
1265	Animalia	Arthropoda	Insecta	Hymenoptera	Crabronidae	Trypoxylon	politum			Drury, 1773			Y	Y
1266	Animalia	Arthropoda	Insecta	Hymenoptera	Diapriidae	Belyta	validicornis			Thomson, 1858		BOLD:AAU8736	Y		Y	Y	BOLD:AAU8736
1267	Animalia	Arthropoda	Insecta	Hymenoptera	Encyrtidae	Copidosoma	floridanum			Ashmead, 1900		BOLD:AAA7203	Y		Y	Y	BOLD:AAA7203
1268	Animalia	Arthropoda	Insecta	Hymenoptera	Eupelmidae	Eupelmus	vesicularis			Retzius, 1783			Y		Y	Y
1269	Animalia	Arthropoda	Insecta	Hymenoptera	Formicidae	Camponotus	herculeanus			Linnaeus, 1758		BOLD:AAA2372	Y		Y	Y	BOLD:AAA2372
1270	Animalia	Arthropoda	Insecta	Hymenoptera	Formicidae	Camponotus	nearcticus			Emery, 1893		BOLD:AAD4432	Y		Y	Y	BOLD:AAD4432
1271	Animalia	Arthropoda	Insecta	Hymenoptera	Formicidae	Camponotus	pennsylvanicus			De Geer, 1773		BOLD:AAA9461	Y		Y	Y	BOLD:AAA9461
1272	Animalia	Arthropoda	Insecta	Hymenoptera	Formicidae	Camponotus	sp.						N	Y
1273	Animalia	Arthropoda	Insecta	Hymenoptera	Formicidae	Crematogaster	cerasi			Fitch, 1855			Y		Y
1274	Animalia	Arthropoda	Insecta	Hymenoptera	Formicidae	Crematogaster	sp.						N	Y
1275	Animalia	Arthropoda	Insecta	Hymenoptera	Formicidae	Formica	lasioides			Emery, 1893		BOLD:AAE0406	Y		Y	Y	BOLD:AAE0406
1276	Animalia	Arthropoda	Insecta	Hymenoptera	Formicidae	Formica	sp.						N	Y
1277	Animalia	Arthropoda	Insecta	Hymenoptera	Formicidae	Lasius	alienus			Foerster, 1850		BOLD:AAA9049	Y		Y	Y	BOLD:AAA9049
1278	Animalia	Arthropoda	Insecta	Hymenoptera	Formicidae	Lasius	claviger			Roger, 1862			Y		Y	Y
1279	Animalia	Arthropoda	Insecta	Hymenoptera	Formicidae	Lasius	nearcticus			Wheeler, 1906		BOLD:AAD1528	Y		Y	Y	BOLD:AAD1528
1280	Animalia	Arthropoda	Insecta	Hymenoptera	Formicidae	Lasius	neoniger			Emery, 1893		BOLD:AAB9126	Y		Y	Y	BOLD:AAB9126
1281	Animalia	Arthropoda	Insecta	Hymenoptera	Formicidae	Lasius	sp.						N	Y
1282	Animalia	Arthropoda	Insecta	Hymenoptera	Formicidae	Leptothorax	ambiguus			Emery, 1895			Y	Y
1283	Animalia	Arthropoda	Insecta	Hymenoptera	Formicidae	Myrmica	sp.						N	Y
1284	Animalia	Arthropoda	Insecta	Hymenoptera	Formicidae	Ponera	pennsylvanica			Buckley, 1866		BOLD:AAF0443	Y		Y	Y	BOLD:AAF0443
1285	Animalia	Arthropoda	Insecta	Hymenoptera	Formicidae	Prenolepis	imparis			Say, 1836		BOLD:AAC1302	Y	Y	Y	Y	BOLD:AAC1302
1286	Animalia	Arthropoda	Insecta	Hymenoptera	Formicidae	Stenamma	brevicorne			Mayr, 1886		BOLD:AAH7068	Y		Y	Y	BOLD:AAH7068
1287	Animalia	Arthropoda	Insecta	Hymenoptera	Formicidae	Stigmatomma	pallipes			Haldeman, 1844			Y		Y
1288	Animalia	Arthropoda	Insecta	Hymenoptera	Formicidae	Tapinoma	sessile			Say, 1836		BOLD:AAA3893|BOLD:AAA3900	Y	Y	Y	Y	BOLD:AAA3893|BOLD:AAA3900
1289	Animalia	Arthropoda	Insecta	Hymenoptera	Formicidae	Temnothorax	ambiguus			Emery, 1895		BOLD:AAG0685	Y		Y	Y	BOLD:AAG0685
1290	Animalia	Arthropoda	Insecta	Hymenoptera	Halictidae	Agapostemon	radiatus			Forster, 1771			Y	Y
1291	Animalia	Arthropoda	Insecta	Hymenoptera	Halictidae	Agapostemon	sericeus			Förster, 1771			Y	Y
1292	Animalia	Arthropoda	Insecta	Hymenoptera	Halictidae	Agapostemon	virescens			Fabricius, 1775			Y	Y
1293	Animalia	Arthropoda	Insecta	Hymenoptera	Halictidae	Augochlora	aurata			Smith, 1853			Y		Y	Y
1294	Animalia	Arthropoda	Insecta	Hymenoptera	Halictidae	Augochlora	pura			Say, 1837			Y		Y	Y
1295	Animalia	Arthropoda	Insecta	Hymenoptera	Halictidae	Augochlorella	aurata			Smith, 1853		BOLD:AAD6445	Y	Y	Y	Y	BOLD:AAD6445
1296	Animalia	Arthropoda	Insecta	Hymenoptera	Halictidae	Dialictus	sp.						N	Y
1297	Animalia	Arthropoda	Insecta	Hymenoptera	Halictidae	Halictus	confusus			Smith, 1853			Y	Y	Y	Y
1298	Animalia	Arthropoda	Insecta	Hymenoptera	Halictidae	Halictus	ligatus			Say, 1837			Y	Y
1299	Animalia	Arthropoda	Insecta	Hymenoptera	Halictidae	Halictus	rubicundus			Christ, 1791			Y	Y
1300	Animalia	Arthropoda	Insecta	Hymenoptera	Halictidae	Lasioglossum	anomalum			Robertson, 1892			Y	Y
1301	Animalia	Arthropoda	Insecta	Hymenoptera	Halictidae	Lasioglossum	atwoodi			Gibbs, 2010			Y	Y
1302	Animalia	Arthropoda	Insecta	Hymenoptera	Halictidae	Lasioglossum	birkmanni			Crawford, 1906			Y		Y	Y
1303	Animalia	Arthropoda	Insecta	Hymenoptera	Halictidae	Lasioglossum	bruneri			Crawford, 1902			Y	Y
1304	Animalia	Arthropoda	Insecta	Hymenoptera	Halictidae	Lasioglossum	comagenense			(Knerer & Atwood, 1964)			Y	Y
1305	Animalia	Arthropoda	Insecta	Hymenoptera	Halictidae	Lasioglossum	coriaceum			Smith, 1853		BOLD:AAB7007	Y		Y	Y	BOLD:AAB7007
1306	Animalia	Arthropoda	Insecta	Hymenoptera	Halictidae	Lasioglossum	cressonii			Robertson, 1890			Y	Y
1307	Animalia	Arthropoda	Insecta	Hymenoptera	Halictidae	Lasioglossum	dreisbachi			Mitchell, 1960			Y	Y
1308	Animalia	Arthropoda	Insecta	Hymenoptera	Halictidae	Lasioglossum	ephialtum			Gibbs, 2010			N	Y
1309	Animalia	Arthropoda	Insecta	Hymenoptera	Halictidae	Lasioglossum	fattigi			Mitchell, 1960			N	Y
1310	Animalia	Arthropoda	Insecta	Hymenoptera	Halictidae	Lasioglossum	foxii			Robertson, 1895			Y	Y
1311	Animalia	Arthropoda	Insecta	Hymenoptera	Halictidae	Lasioglossum	heterognathum			Mitchell, 1960			Y	Y
1312	Animalia	Arthropoda	Insecta	Hymenoptera	Halictidae	Lasioglossum	hitchensi			Gibbs, 2012			Y	Y
1313	Animalia	Arthropoda	Insecta	Hymenoptera	Halictidae	Lasioglossum	imitatum			Smith, 1853			Y	Y	Y	Y
1314	Animalia	Arthropoda	Insecta	Hymenoptera	Halictidae	Lasioglossum	leucozonium			Schrank, 1781			Y	Y
1315	Animalia	Arthropoda	Insecta	Hymenoptera	Halictidae	Lasioglossum	lineatulum			Crawford, 1906			Y	Y
1316	Animalia	Arthropoda	Insecta	Hymenoptera	Halictidae	Lasioglossum	macoupinense			Robertson, 1895			Y	Y
1317	Animalia	Arthropoda	Insecta	Hymenoptera	Halictidae	Lasioglossum	michiganense			Mitchell, 1960			Y	Y
1318	Animalia	Arthropoda	Insecta	Hymenoptera	Halictidae	Lasioglossum	nigroviride			Graenicher, 1911			Y	Y
1319	Animalia	Arthropoda	Insecta	Hymenoptera	Halictidae	Lasioglossum	paradmirandum			Knerer & Atwood, 1966			Y	Y
1320	Animalia	Arthropoda	Insecta	Hymenoptera	Halictidae	Lasioglossum	pectinatum			Robertson, 1890			Y	Y
1321	Animalia	Arthropoda	Insecta	Hymenoptera	Halictidae	Lasioglossum	pectorale			Smith, 1853			Y	Y
1322	Animalia	Arthropoda	Insecta	Hymenoptera	Halictidae	Lasioglossum	perpunctatum			Ellis, 1913			Y	Y
1323	Animalia	Arthropoda	Insecta	Hymenoptera	Halictidae	Lasioglossum	pilosum			Smith, 1853			Y	Y
1324	Animalia	Arthropoda	Insecta	Hymenoptera	Halictidae	Lasioglossum	platyparium			Robertson, 1895			Y	Y
1325	Animalia	Arthropoda	Insecta	Hymenoptera	Halictidae	Lasioglossum	pruinosum			Robertson, 1892			Y	Y
1326	Animalia	Arthropoda	Insecta	Hymenoptera	Halictidae	Lasioglossum	sp. 1						N	Y
1327	Animalia	Arthropoda	Insecta	Hymenoptera	Halictidae	Lasioglossum	sp. 2						N	Y
1328	Animalia	Arthropoda	Insecta	Hymenoptera	Halictidae	Lasioglossum	subversans			Mitchell, 1960			Y	Y
1329	Animalia	Arthropoda	Insecta	Hymenoptera	Halictidae	Lasioglossum	tegulare			Robertson, 1890			Y	Y
1330	Animalia	Arthropoda	Insecta	Hymenoptera	Halictidae	Lasioglossum	tenax			Sandhouse, 1924			Y	Y
1331	Animalia	Arthropoda	Insecta	Hymenoptera	Halictidae	Lasioglossum	timothyi			Gibbs, 2010			Y	Y
1332	Animalia	Arthropoda	Insecta	Hymenoptera	Halictidae	Lasioglossum	versans			Lovell, 1905		BOLD:ABZ6180	Y	Y	Y	Y	BOLD:ABZ6180
1333	Animalia	Arthropoda	Insecta	Hymenoptera	Halictidae	Lasioglossum	versatum			Robertson, 1902			Y	Y
1334	Animalia	Arthropoda	Insecta	Hymenoptera	Halictidae	Lasioglossum	vierecki			Crawford, 1904			Y	Y
1335	Animalia	Arthropoda	Insecta	Hymenoptera	Halictidae	Lasioglossum	weemsi			Mitchell, 1960			Y	Y
1336	Animalia	Arthropoda	Insecta	Hymenoptera	Halictidae	Lasioglossum	zonulum			Smith, 1848			Y	Y
1337	Animalia	Arthropoda	Insecta	Hymenoptera	Halictidae	Lasioglossum	zophops			Ellis, 1914			N	Y
1338	Animalia	Arthropoda	Insecta	Hymenoptera	Halictidae	Sphecodes	atlantis			Mitchell, 1956			Y	Y
1339	Animalia	Arthropoda	Insecta	Hymenoptera	Halictidae	Sphecodes	clematidis			Robertson, 1897			Y	Y
1340	Animalia	Arthropoda	Insecta	Hymenoptera	Halictidae	Sphecodes	confertus			Say, 1837			Y	Y
1341	Animalia	Arthropoda	Insecta	Hymenoptera	Halictidae	Sphecodes	cressonii			Robertson, 1903			Y	Y
1342	Animalia	Arthropoda	Insecta	Hymenoptera	Halictidae	Sphecodes	davisii			Robertson, 1897			N	Y
1343	Animalia	Arthropoda	Insecta	Hymenoptera	Halictidae	Sphecodes	dichrous			Smith, 1853			Y	Y
1344	Animalia	Arthropoda	Insecta	Hymenoptera	Halictidae	Sphecodes	heraclei			Robertson, 1897			Y	Y
1345	Animalia	Arthropoda	Insecta	Hymenoptera	Halictidae	Sphecodes	levis			Lovell & Cockerell, 1907			N	Y
1346	Animalia	Arthropoda	Insecta	Hymenoptera	Halictidae	Sphecodes	minor			Robertson, 1898			N	Y
1347	Animalia	Arthropoda	Insecta	Hymenoptera	Halictidae	Sphecodes	persimilis			Lovell & Cockerell, 1907			Y	Y
1348	Animalia	Arthropoda	Insecta	Hymenoptera	Halictidae	Sphecodes	pycnanthemi			Robertson, 1897			N	Y
1349	Animalia	Arthropoda	Insecta	Hymenoptera	Halictidae	Sphecodes	ranunculi			Robertson, 1897		BOLD:AAC7655	Y		Y	Y	BOLD:AAC7655
1350	Animalia	Arthropoda	Insecta	Hymenoptera	Halictidae	Sphecodes	sp.						N	Y
1351	Animalia	Arthropoda	Insecta	Hymenoptera	Halictidae	Sphecodes	stygius			Robertson, 1893			N	Y
1352	Animalia	Arthropoda	Insecta	Hymenoptera	Halictidae	Sphecodes	wheeleri			Mitchell, 1956			N	Y
1353	Animalia	Arthropoda	Insecta	Hymenoptera	Ichneumonidae	Agrothereutes	abbreviatus			Fabricius, 1794		BOLD:AAG7687	Y		Y	Y	BOLD:AAG7687
1354	Animalia	Arthropoda	Insecta	Hymenoptera	Ichneumonidae	Agrypon	flexorium			Thunberg, 1822		BOLD:AAH7052	Y		Y	Y	BOLD:AAH7052
1355	Animalia	Arthropoda	Insecta	Hymenoptera	Ichneumonidae	Aritranis	director			Thunberg , 1822		BOLD:AAG7768	Y		Y	Y	BOLD:AAG7768
1356	Animalia	Arthropoda	Insecta	Hymenoptera	Ichneumonidae	Bathyplectes	anurus			Thomson, 1887		BOLD:ABA6269	Y		Y	Y	BOLD:ABA6269
1357	Animalia	Arthropoda	Insecta	Hymenoptera	Ichneumonidae	Bathythrix	decipiens			Gravenhorst, 1829		BOLD:AAU8495	Y		Y	Y	BOLD:AAU8495
1358	Animalia	Arthropoda	Insecta	Hymenoptera	Ichneumonidae	Campoletis	flavicincta			Ashmead, 1890		BOLD:AAZ8146	Y		Y	Y	BOLD:AAZ8146
1359	Animalia	Arthropoda	Insecta	Hymenoptera	Ichneumonidae	Cryptus	albitarsis			Cresson, 1864		BOLD:AAH1693	Y		Y	Y	BOLD:AAH1693
1360	Animalia	Arthropoda	Insecta	Hymenoptera	Ichneumonidae	Cylloceria	melancholica			Gravenhorst, 1820			Y		Y	Y
1361	Animalia	Arthropoda	Insecta	Hymenoptera	Ichneumonidae	Cymodusa	distincta			Cresson, 1864		BOLD:ABZ4364	Y		Y	Y	BOLD:ABZ4364
1362	Animalia	Arthropoda	Insecta	Hymenoptera	Ichneumonidae	Diadegma	pendulum			Walley, 1967		BOLD:AAZ9563	Y		Y	Y	BOLD:AAZ9563
1363	Animalia	Arthropoda	Insecta	Hymenoptera	Ichneumonidae	Dialipsis	dissimilis			Dasch, 1992		BOLD:ABA6048	Y		Y	Y	BOLD:ABA6048
1364	Animalia	Arthropoda	Insecta	Hymenoptera	Ichneumonidae	Diplazon	laetatorius			Fabricius, 1781		BOLD:AAD4214	Y		Y	Y	BOLD:AAD4214
1365	Animalia	Arthropoda	Insecta	Hymenoptera	Ichneumonidae	Dolichomitus	irritator			Fabricius, 1775		BOLD:AAU8680	Y		Y	Y	BOLD:AAU8680
1366	Animalia	Arthropoda	Insecta	Hymenoptera	Ichneumonidae	Dusona	minor			Provancher, 1879		BOLD:AAH1652	Y		Y	Y	BOLD:AAH1652
1367	Animalia	Arthropoda	Insecta	Hymenoptera	Ichneumonidae	Enytus	apostata			Gravenhorst, 1829		BOLD:AAG5797	Y		Y	Y	BOLD:AAG5797
1368	Animalia	Arthropoda	Insecta	Hymenoptera	Ichneumonidae	Exochus	nigripalpis			Thomson, 1887		BOLD:AAG7713	Y		Y	Y	BOLD:AAG7713
1369	Animalia	Arthropoda	Insecta	Hymenoptera	Ichneumonidae	Hyposoter	inquinatus			Holmgren, 1860		BOLD:AAU8361	Y		Y	Y	BOLD:AAU8361
1370	Animalia	Arthropoda	Insecta	Hymenoptera	Ichneumonidae	Ichneumon	discoensis			Fox, 1892		BOLD:ACE9045	Y		Y	Y	BOLD:ACE9045
1371	Animalia	Arthropoda	Insecta	Hymenoptera	Ichneumonidae	Ischnus	inquisitorius			Muller, 1776		BOLD:AAG7737	Y		Y	Y	BOLD:AAG7737
1372	Animalia	Arthropoda	Insecta	Hymenoptera	Ichneumonidae	Iseropus	stercorator			Fabricius, 1793		BOLD:AAO2094	Y		Y	Y	BOLD:AAO2094
1373	Animalia	Arthropoda	Insecta	Hymenoptera	Ichneumonidae	Lissonota	coracina			Gmelin, 1790			Y		Y	Y
1374	Animalia	Arthropoda	Insecta	Hymenoptera	Ichneumonidae	Megacara	hortulana			Gravenhorst, 1829		BOLD:AAU8687	Y		Y	Y	BOLD:AAU8687
1375	Animalia	Arthropoda	Insecta	Hymenoptera	Ichneumonidae	Mesochorus	suomiensis			Schwenke, 1999		BOLD:AAZ1979	Y		Y	Y	BOLD:AAZ1979
1376	Animalia	Arthropoda	Insecta	Hymenoptera	Ichneumonidae	Ophion	bilineatus			Say, 1829		BOLD:AAG8323	Y		Y	Y	BOLD:AAG8323
1377	Animalia	Arthropoda	Insecta	Hymenoptera	Ichneumonidae	Ophion	clave			Viereck, 1905		BOLD:AAG7774	Y		Y	Y	BOLD:AAG7774
1378	Animalia	Arthropoda	Insecta	Hymenoptera	Ichneumonidae	Ophion	idoneus			Viereck, 1905		BOLD:AAN8172	Y		Y	Y	BOLD:AAN8172
1379	Animalia	Arthropoda	Insecta	Hymenoptera	Ichneumonidae	Ophion	sp. 5 MDS2014					BOLD:AAI3361	N		Y	Y	BOLD:AAI3361
1380	Animalia	Arthropoda	Insecta	Hymenoptera	Ichneumonidae	Oresbius	taeniatus			Townes, 1962			Y		Y	Y
1381	Animalia	Arthropoda	Insecta	Hymenoptera	Ichneumonidae	Orthocentrus	fulvipes			Gravenhorst, 1829		BOLD:AAM9125	Y		Y	Y	BOLD:AAM9125
1382	Animalia	Arthropoda	Insecta	Hymenoptera	Ichneumonidae	Phobocampe	bicingulata			Gravenhorst, 1829		BOLD:AAM7401	Y		Y	Y	BOLD:AAM7401
1383	Animalia	Arthropoda	Insecta	Hymenoptera	Ichneumonidae	Pimpla	aequalis			Provancher, 1880		BOLD:AAG7634	Y		Y	Y	BOLD:AAG7634
1384	Animalia	Arthropoda	Insecta	Hymenoptera	Ichneumonidae	Pleolophus	basizonus			Gravenhorst			Y		Y	Y
1385	Animalia	Arthropoda	Insecta	Hymenoptera	Ichneumonidae	Podoschistus	vittifrons			Cresson, 1868		BOLD:AAL0380	Y		Y	Y	BOLD:AAL0380
1386	Animalia	Arthropoda	Insecta	Hymenoptera	Ichneumonidae	Stenomacrus	nemoralis			Holmgren, 1858		BOLD:AAM7494	Y		Y	Y	BOLD:AAM7494
1387	Animalia	Arthropoda	Insecta	Hymenoptera	Ichneumonidae	Tranosema	rostrale			Brischke, 1880		BOLD:AAD1926	Y		Y	Y	BOLD:AAD1926
1388	Animalia	Arthropoda	Insecta	Hymenoptera	Ichneumonidae	Zaglyptus	varipes			Gravenhorst, 1829			Y		Y	Y
1389	Animalia	Arthropoda	Insecta	Hymenoptera	Leucospidae	Leucospis	affinis			Say, 1824			Y	Y
1390	Animalia	Arthropoda	Insecta	Hymenoptera	Megachilidae	Anthidiellum	notatum			Latreille, 1809			Y	Y
1391	Animalia	Arthropoda	Insecta	Hymenoptera	Megachilidae	Anthidium	manicatum			Linnaeus, 1758			Y	Y
1392	Animalia	Arthropoda	Insecta	Hymenoptera	Megachilidae	Coelioxys	rufitarsus			Smith, 1854			Y	Y
1393	Animalia	Arthropoda	Insecta	Hymenoptera	Megachilidae	Heriades	variolosa	variolosa		Cresson, 1872			Y	Y
1394	Animalia	Arthropoda	Insecta	Hymenoptera	Megachilidae	Hoplitis	pilosifrons			Cresson, 1864			Y	Y
1395	Animalia	Arthropoda	Insecta	Hymenoptera	Megachilidae	Hoplitis	producta			Cresson, 1864			Y	Y
1396	Animalia	Arthropoda	Insecta	Hymenoptera	Megachilidae	Hoplitis	truncata			Cresson, 1878			Y	Y
1397	Animalia	Arthropoda	Insecta	Hymenoptera	Megachilidae	Megachile	brevis			Say, 1837			Y	Y
1398	Animalia	Arthropoda	Insecta	Hymenoptera	Megachilidae	Megachile	campanulae			Robertson, 1903			Y	Y
1399	Animalia	Arthropoda	Insecta	Hymenoptera	Megachilidae	Megachile	frigide			Smith, 1853			Y	Y
1400	Animalia	Arthropoda	Insecta	Hymenoptera	Megachilidae	Megachile	gemula			Cresson, 1878			Y	Y
1401	Animalia	Arthropoda	Insecta	Hymenoptera	Megachilidae	Megachile	inermis			Provancher, 1888			Y	Y
1402	Animalia	Arthropoda	Insecta	Hymenoptera	Megachilidae	Megachile	latimanus			Say, 1823			Y	Y
1403	Animalia	Arthropoda	Insecta	Hymenoptera	Megachilidae	Megachile	lippiae			Cockerell, 1900			Y	Y
1404	Animalia	Arthropoda	Insecta	Hymenoptera	Megachilidae	Megachile	mendica			Cresson, 1878			Y	Y
1405	Animalia	Arthropoda	Insecta	Hymenoptera	Megachilidae	Megachile	montivaga			Cresson, 1878			Y	Y
1406	Animalia	Arthropoda	Insecta	Hymenoptera	Megachilidae	Megachile	perihirta			Cockerell, 1898			Y	Y
1407	Animalia	Arthropoda	Insecta	Hymenoptera	Megachilidae	Megachile	pugnata			Say, 1837			Y	Y	Y	Y
1408	Animalia	Arthropoda	Insecta	Hymenoptera	Megachilidae	Megachile	relativa			Cresson, 1878			Y	Y
1409	Animalia	Arthropoda	Insecta	Hymenoptera	Megachilidae	Megachile	rotundata			Fabricius, 1793			Y	Y
1410	Animalia	Arthropoda	Insecta	Hymenoptera	Megachilidae	Megachile	texana			Cresson, 1878			Y	Y
1411	Animalia	Arthropoda	Insecta	Hymenoptera	Megachilidae	Osmia	coerulescens			Mitchell, T.B. 1962			Y	Y
1412	Animalia	Arthropoda	Insecta	Hymenoptera	Megachilidae	Osmia	conjuncta			Cresson, 1864			Y	Y
1413	Animalia	Arthropoda	Insecta	Hymenoptera	Megachilidae	Osmia	lignaria			Say, 1837		BOLD:AAE5495	Y		Y	Y	BOLD:AAE5495
1414	Animalia	Arthropoda	Insecta	Hymenoptera	Megachilidae	Osmia	proxima			Cresson, 1864			Y	Y
1415	Animalia	Arthropoda	Insecta	Hymenoptera	Megachilidae	Osmia	pumila			Cresson, 1864			Y	Y
1416	Animalia	Arthropoda	Insecta	Hymenoptera	Megachilidae	Stelis	lateralis			Cresson, 1864			Y	Y
1417	Animalia	Arthropoda	Insecta	Hymenoptera	Mutillidae	Myrmosa	unicolor			Say, 1824			Y	Y
1418	Animalia	Arthropoda	Insecta	Hymenoptera	Mutillidae	Pseudomethoca	frigida			Smith 1855			Y	Y
1419	Animalia	Arthropoda	Insecta	Hymenoptera	Mymaridae	Anaphes	listronoti			Huber, 1997			Y		Y	Y
1420	Animalia	Arthropoda	Insecta	Hymenoptera	Mymaridae	Gonatocerus	morrilli			Howard, 1908			Y		Y	Y
1421	Animalia	Arthropoda	Insecta	Hymenoptera	Mymaridae	Ooctonus	silvensis			Girault, 1916		BOLD:AAN7553	Y		Y	Y	BOLD:AAN7553
1422	Animalia	Arthropoda	Insecta	Hymenoptera	Platygastridae	Platygaster	variabilis			Fouts, 1924		BOLD:ABW3242	Y		Y	Y	BOLD:ABW3242
1423	Animalia	Arthropoda	Insecta	Hymenoptera	Platygastridae	Synopeas	pennsylvanicum			Fouts, 1924		BOLD:ABA6127	Y		Y	Y	BOLD:ABA6127
1424	Animalia	Arthropoda	Insecta	Hymenoptera	Platygastridae	Telenomus	podisi			Ashmead, 1893		BOLD:AAG7891|BOLD:AAY9192|BOLD:ACU5364	Y		Y	Y	BOLD:AAG7891|BOLD:AAY9192|BOLD:ACU5364
1425	Animalia	Arthropoda	Insecta	Hymenoptera	Pompilidae	Agenioideus	cinctellus			Spinola, 1808			Y	Y
1426	Animalia	Arthropoda	Insecta	Hymenoptera	Pompilidae	Agenioideus	humilis			Cresson, 1867			Y	Y
1427	Animalia	Arthropoda	Insecta	Hymenoptera	Pompilidae	Anoplius	imbellis			Banks, 1944			Y	Y
1428	Animalia	Arthropoda	Insecta	Hymenoptera	Pompilidae	Anoplius	nigerrimus			van der Vecht, 1973			Y	Y
1429	Animalia	Arthropoda	Insecta	Hymenoptera	Pompilidae	Anoplius	virginiensis			Cresson			Y	Y
1430	Animalia	Arthropoda	Insecta	Hymenoptera	Pompilidae	Aporinellus	wheeleri			Baquaert, 1919			Y	Y
1431	Animalia	Arthropoda	Insecta	Hymenoptera	Pompilidae	Arachnospila	michiganensis	michiganensis		(Dreisbach)			Y	Y
1432	Animalia	Arthropoda	Insecta	Hymenoptera	Pompilidae	Auplopus	carbonarius			Scopoli, 1763			Y	Y
1433	Animalia	Arthropoda	Insecta	Hymenoptera	Pompilidae	Auplopus	mellipes	variitarsatus		Dalla Torre, 1897			Y	Y
1434	Animalia	Arthropoda	Insecta	Hymenoptera	Pompilidae	Auplopus	nigrellus			Banks, 1912			Y	Y
1435	Animalia	Arthropoda	Insecta	Hymenoptera	Pompilidae	Caliadurgus	fasciatellus	alienatus		Smith, 1855			Y	Y
1436	Animalia	Arthropoda	Insecta	Hymenoptera	Pompilidae	Dipogon	sayi	sayi		Banks, 1941			Y	Y
1437	Animalia	Arthropoda	Insecta	Hymenoptera	Pompilidae	Episyron	biguttatus	biguttatus		Fabricius, 1798			Y	Y
1438	Animalia	Arthropoda	Insecta	Hymenoptera	Pompilidae	Priocnemis	cornica			Say, 1836			Y	Y
1439	Animalia	Arthropoda	Insecta	Hymenoptera	Pompilidae	Priocnemis	germana			Cresson, 1867			Y	Y
1440	Animalia	Arthropoda	Insecta	Hymenoptera	Pompilidae	Priocnemis	minorata			Banks, 1912			Y	Y
1441	Animalia	Arthropoda	Insecta	Hymenoptera	Pompilidae	Priocnemis	notha	notha		Cresson, 1867			Y	Y
1442	Animalia	Arthropoda	Insecta	Hymenoptera	Pompilidae	Priocnemis	scitula	relicta		Banks, 1912			Y	Y
1443	Animalia	Arthropoda	Insecta	Hymenoptera	Pteromalidae	Mesopolobus	bruchophagi			Gahan, 1917		BOLD:ACL4975	Y		Y	Y	BOLD:ACL4975
1444	Animalia	Arthropoda	Insecta	Hymenoptera	Sapygidae	Sapyga	centrata			Say, 1836		BOLD:ACL7820	Y		Y	Y	BOLD:ACL7820
1445	Animalia	Arthropoda	Insecta	Hymenoptera	Sierolomorphidae	Sierolomorpha	canadensis			Provancher, 1888			Y	Y
1446	Animalia	Arthropoda	Insecta	Hymenoptera	Siricidae	Tremex	columba			Linnaeus			Y		Y	Y
1447	Animalia	Arthropoda	Insecta	Hymenoptera	Sphecidae	Chalybion	californicum			de Saussure, 1867			Y	Y
1448	Animalia	Arthropoda	Insecta	Hymenoptera	Sphecidae	Isodontia	auripes			Fernald, 1906			Y	Y
1449	Animalia	Arthropoda	Insecta	Hymenoptera	Sphecidae	Isodontia	mexicana			de Saussure, 1867			Y	Y
1450	Animalia	Arthropoda	Insecta	Hymenoptera	Sphecidae	Sceliphron	caementarium			Drury, 1773			Y	Y
1451	Animalia	Arthropoda	Insecta	Hymenoptera	Sphecidae	Sphex	ichneumoneus			Linnaeus, 1758			Y	Y
1452	Animalia	Arthropoda	Insecta	Hymenoptera	Tenthredinidae	Ametastegia	aperta			Norton, 1861		BOLD:AAI4543	Y		Y	Y	BOLD:AAI4543
1453	Animalia	Arthropoda	Insecta	Hymenoptera	Tenthredinidae	Ametastegia	pallipes			Spinola		BOLD:AAE5602	Y		Y	Y	BOLD:AAE5602
1454	Animalia	Arthropoda	Insecta	Hymenoptera	Tenthredinidae	Caulocampus	acericaulis			MacGillivray, 1906		BOLD:ACJ9109	Y		Y	Y	BOLD:ACJ9109
1455	Animalia	Arthropoda	Insecta	Hymenoptera	Tenthredinidae	Dolerus	asper			Zaddach, 1859		BOLD:AAG7773	Y		Y	Y	BOLD:AAG7773
1456	Animalia	Arthropoda	Insecta	Hymenoptera	Tenthredinidae	Dolerus	nitens			Zaddach 1859		BOLD:ACV5952	Y		Y	Y	BOLD:ACV5952
1457	Animalia	Arthropoda	Insecta	Hymenoptera	Tenthredinidae	Empria	maculata			Norton, 1861		BOLD:ACC8799	Y		Y	Y	BOLD:ACC8799
1458	Animalia	Arthropoda	Insecta	Hymenoptera	Tenthredinidae	Empria	nordica			Ross 1936		BOLD:ACI4328	Y		Y	Y	BOLD:ACI4328
1459	Animalia	Arthropoda	Insecta	Hymenoptera	Tenthredinidae	Fenusa	ulmi			Sundevall		BOLD:AAN7643	Y		Y	Y	BOLD:AAN7643
1460	Animalia	Arthropoda	Insecta	Hymenoptera	Tenthredinidae	Halidamia	affinis			Fallén 1807		BOLD:AAN7641	Y		Y	Y	BOLD:AAN7641
1461	Animalia	Arthropoda	Insecta	Hymenoptera	Tenthredinidae	Macrophya	flavolineata			Norton 1860		BOLD:ABU8852	Y		Y	Y	BOLD:ABU8852
1462	Animalia	Arthropoda	Insecta	Hymenoptera	Tenthredinidae	Metallus	lanceolatus			Thomson, 1870		BOLD:AAP1085	Y		Y	Y	BOLD:AAP1085
1463	Animalia	Arthropoda	Insecta	Hymenoptera	Tenthredinidae	Monophadnus	pallescens			Gmelin 1790		BOLD:ACK2140	Y		Y	Y	BOLD:ACK2140
1464	Animalia	Arthropoda	Insecta	Hymenoptera	Tenthredinidae	Pachynematus	extensicornis			Norton		BOLD:AAN8130	Y		Y	Y	BOLD:AAN8130
1465	Animalia	Arthropoda	Insecta	Hymenoptera	Tenthredinidae	Periclista	sp. tM8					BOLD:AAG3550	N		Y	Y	BOLD:AAG3550
1466	Animalia	Arthropoda	Insecta	Hymenoptera	Tenthredinidae	Priophorus	compressicornis			Fabricius, 1804		BOLD:ACI7354	Y		Y	Y	BOLD:ACI7354
1467	Animalia	Arthropoda	Insecta	Hymenoptera	Tenthredinidae	Pristiphora	chlorea			Norton 1867		BOLD:ACG2990|BOLD:ACM9731	Y		Y	Y	BOLD:ACG2990|BOLD:ACM9731
1468	Animalia	Arthropoda	Insecta	Hymenoptera	Tenthredinidae	Taxonus	epicera			Say 1836		BOLD:ACC7921	Y		Y	Y	BOLD:ACC7921
1469	Animalia	Arthropoda	Insecta	Hymenoptera	Tenthredinidae	Taxonus	pallicoxus			Provancher 1885		BOLD:AAG7788	Y		Y	Y	BOLD:AAG7788
1470	Animalia	Arthropoda	Insecta	Hymenoptera	Tenthredinidae	Taxonus	terminalis			Say 1824		BOLD:AAU8702	Y		Y	Y	BOLD:AAU8702
1471	Animalia	Arthropoda	Insecta	Hymenoptera	Tenthredinidae	Tomostethus	multicinctus			Rohwer		BOLD:ACV5036	Y		Y	Y	BOLD:ACV5036
1472	Animalia	Arthropoda	Insecta	Hymenoptera	Trichogrammatidae	Trichogramma	platneri			Nagarkatti, 1975		BOLD:AAE0242	Y		Y	Y	BOLD:AAE0242
1473	Animalia	Arthropoda	Insecta	Hymenoptera	Vespidae	Ancistrocerus	adiabatus	adiabatus		Saussure, 1852			Y	Y
1474	Animalia	Arthropoda	Insecta	Hymenoptera	Vespidae	Ancistrocerus	albophaleratus			de Saussure, 1855			Y	Y
1475	Animalia	Arthropoda	Insecta	Hymenoptera	Vespidae	Ancistrocerus	antilope	antilope		Panzer, 1798			Y	Y
1476	Animalia	Arthropoda	Insecta	Hymenoptera	Vespidae	Ancistrocerus	campestris			Saussure, 1852			Y	Y
1477	Animalia	Arthropoda	Insecta	Hymenoptera	Vespidae	Ancistrocerus	catskill			Saussure, 1853			Y	Y
1478	Animalia	Arthropoda	Insecta	Hymenoptera	Vespidae	Ancistrocerus	unifasciatus	unifasciatus		Saussure, 1852			Y	Y
1479	Animalia	Arthropoda	Insecta	Hymenoptera	Vespidae	Dolichovespula	arenaria			Fabricius		BOLD:ACE9710	Y		Y	Y	BOLD:ACE9710
1480	Animalia	Arthropoda	Insecta	Hymenoptera	Vespidae	Eumenes	crucifer			Provancher, 1888			Y	Y
1481	Animalia	Arthropoda	Insecta	Hymenoptera	Vespidae	Eumenes	fraternus			Say			Y	Y
1482	Animalia	Arthropoda	Insecta	Hymenoptera	Vespidae	Euodynerus	foraminatus	foraminatus		de Saussure, 1853			Y	Y
1483	Animalia	Arthropoda	Insecta	Hymenoptera	Vespidae	Euodynerus	leucomelas	leucomelas		de Saussure, 1856			Y	Y
1484	Animalia	Arthropoda	Insecta	Hymenoptera	Vespidae	Monobia	quadridens			Linnaeus, 1763			Y	Y
1485	Animalia	Arthropoda	Insecta	Hymenoptera	Vespidae	Parancistrocerus	leionotus			Viereck, 1906			Y	Y
1486	Animalia	Arthropoda	Insecta	Hymenoptera	Vespidae	Parancistrocerus	pedestris			de Saussure, 1855			Y	Y			subsp pedestris? No authorship found
1487	Animalia	Arthropoda	Insecta	Hymenoptera	Vespidae	Parancistrocerus	pensylvanicus			de Saussure, 1856			Y		Y	Y
1488	Animalia	Arthropoda	Insecta	Hymenoptera	Vespidae	Parancistrocerus	pensylvanicus	pensylvanicus		de Saussure, 1856			Y	Y
1489	Animalia	Arthropoda	Insecta	Hymenoptera	Vespidae	Polistes	dominula			Christ, 1791		BOLD:AAB7105	Y	Y	Y	Y	BOLD:AAB7105
1490	Animalia	Arthropoda	Insecta	Hymenoptera	Vespidae	Polistes	fuscatus			Fabricius, 1793			Y	Y
1491	Animalia	Arthropoda	Insecta	Hymenoptera	Vespidae	Symmorphus	canadensis			Saussure, 1855			Y	Y
1492	Animalia	Arthropoda	Insecta	Hymenoptera	Vespidae	Symmorphus	cristatus			Saussure, 1856			Y	Y
1493	Animalia	Arthropoda	Insecta	Hymenoptera	Vespidae	Vespula	flavopilosa			Jakobson, 1978			Y	Y
1494	Animalia	Arthropoda	Insecta	Hymenoptera	Vespidae	Vespula	germanica			Fabricius, 1793		BOLD:AAG9055	Y		Y	Y	BOLD:AAG9055
1495	Animalia	Arthropoda	Insecta	Hymenoptera	Vespidae	Vespula	maculifrons			Buysson		BOLD:AAD5593	Y	Y	Y	Y	BOLD:AAD5593
1496	Animalia	Arthropoda	Insecta	Hymenoptera	Vespidae	Vespula	vidua			de Saussure, 1854		BOLD:AAN8137	Y	Y	Y	Y	BOLD:AAN8137
1497	Animalia	Arthropoda	Insecta	Hymenoptera	Vespidae	Vespula	vulgaris			Linnaeus, 1758			Y	Y
1498	Animalia	Arthropoda	Insecta	Lepidoptera	Blastobasidae	Asaphocrita	busckiella			Dietz, 1910		BOLD:AAA8938	Y		Y	Y	BOLD:AAA8938
1499	Animalia	Arthropoda	Insecta	Lepidoptera	Blastobasidae	Blastobasis	glandulella			Riley, 1871		BOLD:AAB1096	Y		Y	Y	BOLD:AAB1096
1500	Animalia	Arthropoda	Insecta	Lepidoptera	Bucculatricidae	Bucculatrix	ainsliella			Murtfeldt 1905		BOLD:AAB4931	Y		Y	Y	BOLD:AAB4931
1501	Animalia	Arthropoda	Insecta	Lepidoptera	Bucculatricidae	Bucculatrix	pomifoliella			Clemens, 1860		BOLD:AAD2085	Y		Y	Y	BOLD:AAD2085
1502	Animalia	Arthropoda	Insecta	Lepidoptera	Cosmopterigidae	Cosmopterix	montisella			Chambers, 1875		BOLD:AAH4285	Y		Y	Y	BOLD:AAH4285
1503	Animalia	Arthropoda	Insecta	Lepidoptera	Cosmopterigidae	Teladoma	helianthi			Busck, 1932		BOLD:AAE1519	Y		Y	Y	BOLD:AAE1519
1504	Animalia	Arthropoda	Insecta	Lepidoptera	Crambidae	Acentria	ephemerella			Denis & Schiffermüller, 1775			Y		Y	Y
1505	Animalia	Arthropoda	Insecta	Lepidoptera	Crambidae	Agriphila	vulgivagella			Clemens, 1860			Y	Y
1506	Animalia	Arthropoda	Insecta	Lepidoptera	Crambidae	Anania	funebris			Ström, 1768		BOLD:AAB4181	Y		Y	Y	BOLD:AAB4181
1507	Animalia	Arthropoda	Insecta	Lepidoptera	Crambidae	Desmia	maculalis			Westwood, 1832		BOLD:ACE8375	Y		Y	Y	BOLD:ACE8375
1508	Animalia	Arthropoda	Insecta	Lepidoptera	Crambidae	Elophila	gyralis			Hulst, 1886			Y		Y	Y
1509	Animalia	Arthropoda	Insecta	Lepidoptera	Crambidae	Elophila	icciusalis			Walker, 1859			Y		Y	Y
1510	Animalia	Arthropoda	Insecta	Lepidoptera	Crambidae	Elophila	tinealis			Munroe, 1972			Y		Y	Y
1511	Animalia	Arthropoda	Insecta	Lepidoptera	Crambidae	Loxostege	sticticalis			Linnaeus, 1761			Y		Y	Y
1512	Animalia	Arthropoda	Insecta	Lepidoptera	Crambidae	Microcrambus	elegans			Clemens, 1860			Y		Y	Y
1513	Animalia	Arthropoda	Insecta	Lepidoptera	Crambidae	Nomophila	nearctica			Munroe, 1973			Y	Y
1514	Animalia	Arthropoda	Insecta	Lepidoptera	Crambidae	Perispasta	caeculalis			Zell., 1875			Y		Y	Y
1515	Animalia	Arthropoda	Insecta	Lepidoptera	Crambidae	Petrophila	bifascialis			Robinson, 1869			Y		Y	Y
1516	Animalia	Arthropoda	Insecta	Lepidoptera	Crambidae	Sitochroa	palealis			Denis & Schiffermüller, 1775			Y		Y	Y
1517	Animalia	Arthropoda	Insecta	Lepidoptera	Crambidae	Udea	rubigalis			Guenée, 1854			Y	Y
1518	Animalia	Arthropoda	Insecta	Lepidoptera	Crambidae	Urola	nivalis			Drury, 1773			Y		Y	Y
1519	Animalia	Arthropoda	Insecta	Lepidoptera	Depressariidae	Agonopterix	arenella			Denis & Schiffermüller, 1775		BOLD:AAC6982	Y		Y	Y	BOLD:AAC6982
1520	Animalia	Arthropoda	Insecta	Lepidoptera	Depressariidae	Agonopterix	pulvipennella			Clemens, 1864		BOLD:AAA7550	Y		Y	Y	BOLD:AAA7550
1521	Animalia	Arthropoda	Insecta	Lepidoptera	Depressariidae	Depressaria	depressana			Fabricius, 1775			Y		Y	Y
1522	Animalia	Arthropoda	Insecta	Lepidoptera	Depressariidae	Machimia	tentoriferella			Clemens, 1860			Y		Y	Y
1523	Animalia	Arthropoda	Insecta	Lepidoptera	Drepanidae	Drepana	arcuata			Walker			Y		Y	Y
1524	Animalia	Arthropoda	Insecta	Lepidoptera	Elachistidae	Perittia	herrichiella			Herrich-Schaffer, 1855			Y		Y	Y
1525	Animalia	Arthropoda	Insecta	Lepidoptera	Epermeniidae	Epermenia	albapunctella			Busck, 1908		BOLD:AAF0142	Y		Y	Y	BOLD:AAF0142
1526	Animalia	Arthropoda	Insecta	Lepidoptera	Erebidae	Apantesis	phalerata			Harris, 1841			Y		Y	Y
1527	Animalia	Arthropoda	Insecta	Lepidoptera	Erebidae	Cisseps	fulvicollis			Hübner, 1818			Y		Y	Y
1528	Animalia	Arthropoda	Insecta	Lepidoptera	Erebidae	Ctenucha	virginica			Esper, 1794			Y		Y	Y
1529	Animalia	Arthropoda	Insecta	Lepidoptera	Erebidae	Hypena	madefactalis			Guenée, 1854			Y		Y	Y
1530	Animalia	Arthropoda	Insecta	Lepidoptera	Erebidae	Hypena	scabra			Fabricius, 1798			Y	Y	Y	Y
1531	Animalia	Arthropoda	Insecta	Lepidoptera	Erebidae	Hyphantria	cunea			Drury, 1773			Y		Y	Y
1532	Animalia	Arthropoda	Insecta	Lepidoptera	Erebidae	Lymantria	dispar	dispar		Linnaeus, 1758			Y		Y	Y
1533	Animalia	Arthropoda	Insecta	Lepidoptera	Erebidae	Rivula	propinqualis			Guenée, 1854		BOLD:AAA4282	Y		Y	Y	BOLD:AAA4282
1534	Animalia	Arthropoda	Insecta	Lepidoptera	Gelechiidae	Bryotropha	hodgesi			Rutten & Karsholt, 2004		BOLD:AAH4276	Y		Y	Y	BOLD:AAH4276
1535	Animalia	Arthropoda	Insecta	Lepidoptera	Gelechiidae	Chionodes	fondella			Busck, 1906		BOLD:ABA4737	Y		Y	Y	BOLD:ABA4737
1536	Animalia	Arthropoda	Insecta	Lepidoptera	Gelechiidae	Chrysoesthia	sexguttella			Thunberg, 1794		BOLD:AAD8505	Y		Y	Y	BOLD:AAD8505
1537	Animalia	Arthropoda	Insecta	Lepidoptera	Gelechiidae	Dichomeris	furia			Hodges, 1986		BOLD:AAI9560	Y		Y	Y	BOLD:AAI9560
1538	Animalia	Arthropoda	Insecta	Lepidoptera	Gelechiidae	Dichomeris	inserrata			Walsingham, 1882		BOLD:AAH4488	Y		Y	Y	BOLD:AAH4488
1539	Animalia	Arthropoda	Insecta	Lepidoptera	Gelechiidae	Dichomeris	leuconotella			Busck, 1904			Y		Y	Y
1540	Animalia	Arthropoda	Insecta	Lepidoptera	Gelechiidae	Dichomeris	ligulella			Hübner, 1818		BOLD:AAA8109	Y		Y	Y	BOLD:AAA8109
1541	Animalia	Arthropoda	Insecta	Lepidoptera	Gelechiidae	Dichomeris	mercatrix			Hodges, 1986			Y		Y	Y
1542	Animalia	Arthropoda	Insecta	Lepidoptera	Gelechiidae	Helcystogramma	hystricella			Braun, 1921		BOLD:AAE7016	Y		Y	Y	BOLD:AAE7016
1543	Animalia	Arthropoda	Insecta	Lepidoptera	Gelechiidae	Metzneria	lappella			Linnaeus, 1758			Y		Y	Y
1544	Animalia	Arthropoda	Insecta	Lepidoptera	Gelechiidae	Monochroa	fragariae			Busck, 1919			Y		Y	Y
1545	Animalia	Arthropoda	Insecta	Lepidoptera	Gelechiidae	Scrobipalpa	acuminatella			Sircom, 1850		BOLD:AAC1644	Y		Y	Y	BOLD:AAC1644
1546	Animalia	Arthropoda	Insecta	Lepidoptera	Gelechiidae	Scrobipalpula	physaliella			Chambers, 1872		BOLD:ACB8750	Y		Y	Y	BOLD:ACB8750
1547	Animalia	Arthropoda	Insecta	Lepidoptera	Gelechiidae	Scrobipalpula	sacculicola			Braun, 1925		BOLD:ABY8834	Y		Y	Y	BOLD:ABY8834
1548	Animalia	Arthropoda	Insecta	Lepidoptera	Gelechiidae	Sinoe	chambersi			Lee, 2012		BOLD:ACF2217	Y		Y	Y	BOLD:ACF2217
1549	Animalia	Arthropoda	Insecta	Lepidoptera	Gelechiidae	Xenolechia	ontariensis			Keifer, 1933		BOLD:AAC6357	Y		Y	Y	BOLD:AAC6357
1550	Animalia	Arthropoda	Insecta	Lepidoptera	Geometridae	Alsophila	pometaria			Harris, 1841		BOLD:AAB0196	Y		Y	Y	BOLD:AAB0196
1551	Animalia	Arthropoda	Insecta	Lepidoptera	Geometridae	Besma	quercivoraria			Guenée in Boisduval and Guenée, 1858			Y		Y	Y
1552	Animalia	Arthropoda	Insecta	Lepidoptera	Geometridae	Biston	betularia			Linnaeus, 1758			Y		Y	Y
1553	Animalia	Arthropoda	Insecta	Lepidoptera	Geometridae	Campaea	perlata			Guenée in Boisduval and Guenée, 1858			Y		Y	Y
1554	Animalia	Arthropoda	Insecta	Lepidoptera	Geometridae	Coryphista	meadii			Packard, 1874			Y		Y	Y
1555	Animalia	Arthropoda	Insecta	Lepidoptera	Geometridae	Costaconvexa	centrostrigaria			Wollaston, 1858			Y		Y	Y
1556	Animalia	Arthropoda	Insecta	Lepidoptera	Geometridae	Ecliptopera	silaceata			[Denis and Schiffermüller], 1775			Y	Y
1557	Animalia	Arthropoda	Insecta	Lepidoptera	Geometridae	Ennomos	magnaria			Guenée in Boisduval and Guenée, 1858			Y		Y	Y
1558	Animalia	Arthropoda	Insecta	Lepidoptera	Geometridae	Epirrhoe	alternata			Müller, 1764			Y	Y	Y	Y
1559	Animalia	Arthropoda	Insecta	Lepidoptera	Geometridae	Euchlaena	serrata			Drury, 1773			Y		Y	Y
1560	Animalia	Arthropoda	Insecta	Lepidoptera	Geometridae	Idaea	dimidiata			Hufnagel, 1767			Y		Y	Y
1561	Animalia	Arthropoda	Insecta	Lepidoptera	Geometridae	Operophtera	bruceata			Hulst, 1886		BOLD:AAA2999	Y		Y	Y	BOLD:AAA2999
1562	Animalia	Arthropoda	Insecta	Lepidoptera	Geometridae	Orthonama	obstipata			Fabricius, 1794			Y	Y	Y	Y
1563	Animalia	Arthropoda	Insecta	Lepidoptera	Geometridae	Phigalia	titea			Cramer, 1780		BOLD:AAA5234	Y		Y	Y	BOLD:AAA5234
1564	Animalia	Arthropoda	Insecta	Lepidoptera	Geometridae	Plagodis	phlogosaria			Guenée in Boisduval and Guenée, 1858		BOLD:AAA3984	Y		Y	Y	BOLD:AAA3984
1565	Animalia	Arthropoda	Insecta	Lepidoptera	Geometridae	Pleuroprucha	insulsaria			Guenée in Boisduval and Guenée, 1858			Y	Y
1566	Animalia	Arthropoda	Insecta	Lepidoptera	Geometridae	Scopula	inductata			Guenée in Boisduval and Guenée, 1858			Y		Y	Y
1567	Animalia	Arthropoda	Insecta	Lepidoptera	Geometridae	Speranza	pustularia			Guenée in Boisduval and Guenée, 1858		BOLD:AAA4456	Y		Y	Y	BOLD:AAA4456
1568	Animalia	Arthropoda	Insecta	Lepidoptera	Geometridae	Synchlora	frondaria			Guenée in Boisduval and Guenée, 1858			Y		Y	Y
1569	Animalia	Arthropoda	Insecta	Lepidoptera	Geometridae	Trichodezia	albovittata			Guenée in Boisduval and Guenée, 1858		BOLD:AAA6926	Y	Y	Y	Y	BOLD:AAA6926
1570	Animalia	Arthropoda	Insecta	Lepidoptera	Geometridae	Xanthorhoe	ferrugata			Clerck, 1759		BOLD:AAA3817	Y	Y	Y	Y	BOLD:AAA3817
1571	Animalia	Arthropoda	Insecta	Lepidoptera	Geometridae	Xanthorhoe	lacustrata			Guenée in Boisduval and Guenée, 1858		BOLD:AAA8660	Y		Y	Y	BOLD:AAA8660
1572	Animalia	Arthropoda	Insecta	Lepidoptera	Gracillariidae	Acrocercops	astericola			Frey & Boll, 1873		BOLD:AAD3996	Y		Y	Y	BOLD:AAD3996
1573	Animalia	Arthropoda	Insecta	Lepidoptera	Gracillariidae	Caloptilia	packardella			Chambers, 1872		BOLD:AAD2590	Y		Y	Y	BOLD:AAD2590
1574	Animalia	Arthropoda	Insecta	Lepidoptera	Gracillariidae	Cameraria	saccharella			Braun, 1908		BOLD:AAH4493	Y		Y	Y	BOLD:AAH4493
1575	Animalia	Arthropoda	Insecta	Lepidoptera	Gracillariidae	Cremastobombycia	solidaginis			Frey & Boll, 1876			Y		Y	Y
1576	Animalia	Arthropoda	Insecta	Lepidoptera	Gracillariidae	Parornix	betulae			Stainton, 1854		BOLD:AAE3418	Y		Y	Y	BOLD:AAE3418
1577	Animalia	Arthropoda	Insecta	Lepidoptera	Gracillariidae	Parornix	crataegifoliella			Clemens, 1860		BOLD:AAF8198	Y		Y	Y	BOLD:AAF8198
1578	Animalia	Arthropoda	Insecta	Lepidoptera	Gracillariidae	Phyllocnistis	ampelopsiella			Chambers, 1871		BOLD:AAI3015	Y		Y	Y	BOLD:AAI3015
1579	Animalia	Arthropoda	Insecta	Lepidoptera	Gracillariidae	Phyllocnistis	vitegenella			Clemens, 1859		BOLD:AAI3014	Y		Y	Y	BOLD:AAI3014
1580	Animalia	Arthropoda	Insecta	Lepidoptera	Gracillariidae	Phyllonorycter	clemensella			Chambers, 1871		BOLD:AAN8981	Y		Y	Y	BOLD:AAN8981
1581	Animalia	Arthropoda	Insecta	Lepidoptera	Gracillariidae	Phyllonorycter	maestingella			Müller, 1764		BOLD:AAL6962	Y		Y	Y	BOLD:AAL6962
1582	Animalia	Arthropoda	Insecta	Lepidoptera	Gracillariidae	Phyllonorycter	ostryaefoliella			Clemens, 1859		BOLD:AAD7999	Y		Y	Y	BOLD:AAD7999
1583	Animalia	Arthropoda	Insecta	Lepidoptera	Gracillariidae	Phyllonorycter	propinquinella			Braun, 1908		BOLD:AAH4497	Y		Y	Y	BOLD:AAH4497
1584	Animalia	Arthropoda	Insecta	Lepidoptera	Gracillariidae	Phyllonorycter	salicifoliella			Chambers, 1871		BOLD:AAD4915	Y		Y	Y	BOLD:AAD4915
1585	Animalia	Arthropoda	Insecta	Lepidoptera	Gracillariidae	Phyllonorycter	trinotella			Braun, 1908		BOLD:AAG1128	Y		Y	Y	BOLD:AAG1128
1586	Animalia	Arthropoda	Insecta	Lepidoptera	Gracillariidae	Phyllonorycter	tritaenianella			Chambers, 1871		BOLD:AAF6577	Y		Y	Y	BOLD:AAF6577
1587	Animalia	Arthropoda	Insecta	Lepidoptera	Hesperiidae	Anatrytone	logan			W. H. Edwards, 1863			Y	Y
1588	Animalia	Arthropoda	Insecta	Lepidoptera	Hesperiidae	Ancyloxypha	numitor			Fabricius, 1793			Y	Y
1589	Animalia	Arthropoda	Insecta	Lepidoptera	Hesperiidae	Atalopedes	campestris			Boisduval, 1852			Y	Y
1590	Animalia	Arthropoda	Insecta	Lepidoptera	Hesperiidae	Carterocephalus	palaemon			Pallas, 1771			Y	Y
1591	Animalia	Arthropoda	Insecta	Lepidoptera	Hesperiidae	Epargyreus	clarus			Cramer, 1775			Y	Y	Y	Y
1592	Animalia	Arthropoda	Insecta	Lepidoptera	Hesperiidae	Erynnis	baptisiae			W. Forbes, 1936			Y	Y
1593	Animalia	Arthropoda	Insecta	Lepidoptera	Hesperiidae	Erynnis	juvenalis			Fabricius, 1793		BOLD:AAC6872	Y	Y	Y	Y	BOLD:AAC6872
1594	Animalia	Arthropoda	Insecta	Lepidoptera	Hesperiidae	Erynnis	lucilius			Scudder and Burgess, 1870			Y	Y
1595	Animalia	Arthropoda	Insecta	Lepidoptera	Hesperiidae	Euphyes	conspicua			W. H. Edwards, 1863			Y	Y
1596	Animalia	Arthropoda	Insecta	Lepidoptera	Hesperiidae	Euphyes	dion			W. H. Edwards, 1879			Y	Y
1597	Animalia	Arthropoda	Insecta	Lepidoptera	Hesperiidae	Euphyes	vestris			Boisduval, 1852			Y	Y
1598	Animalia	Arthropoda	Insecta	Lepidoptera	Hesperiidae	Pholisora	catullus			Fabricius, 1793			Y	Y
1599	Animalia	Arthropoda	Insecta	Lepidoptera	Hesperiidae	Poanes	hobomok			T. Harris, 1862			Y	Y
1600	Animalia	Arthropoda	Insecta	Lepidoptera	Hesperiidae	Poanes	massasoit			Scudder, 1863			Y	Y
1601	Animalia	Arthropoda	Insecta	Lepidoptera	Hesperiidae	Poanes	viator			W. H. Edwards, 1865			Y	Y
1602	Animalia	Arthropoda	Insecta	Lepidoptera	Hesperiidae	Polites	mystic			W. H. Edwards, 1863			Y	Y
1603	Animalia	Arthropoda	Insecta	Lepidoptera	Hesperiidae	Polites	origenes			Fabricius, 1793			Y	Y
1604	Animalia	Arthropoda	Insecta	Lepidoptera	Hesperiidae	Polites	peckius			W. Kirby, 1837			Y	Y
1605	Animalia	Arthropoda	Insecta	Lepidoptera	Hesperiidae	Polites	themistocles			Latreille, 1824			Y	Y
1606	Animalia	Arthropoda	Insecta	Lepidoptera	Hesperiidae	Pompeius	verna			W. H. Edwards, 1862			Y	Y
1607	Animalia	Arthropoda	Insecta	Lepidoptera	Hesperiidae	Thymelicus	lineola			Ochsenheimer, 1808			Y	Y	Y	Y
1608	Animalia	Arthropoda	Insecta	Lepidoptera	Hesperiidae	Wallengrenia	egeremet			Scudder, 1863			Y	Y
1609	Animalia	Arthropoda	Insecta	Lepidoptera	Lasiocampidae	Malacosoma	disstria			Hubner		BOLD:AAA4130	Y		Y	Y	BOLD:AAA4130
1610	Animalia	Arthropoda	Insecta	Lepidoptera	Lasiocampidae	Tolype	velleda			Stoll, 1791			Y	Y
1611	Animalia	Arthropoda	Insecta	Lepidoptera	Lycaenidae	Celastrina	ladon			Cramer, 1780			Y	Y
1612	Animalia	Arthropoda	Insecta	Lepidoptera	Lycaenidae	Celastrina	neglecta			W. H. Edwards, 1862			Y	Y
1613	Animalia	Arthropoda	Insecta	Lepidoptera	Lycaenidae	Cupido	comyntas			Godart, 1824			Y	Y	Y	Y
1614	Animalia	Arthropoda	Insecta	Lepidoptera	Lycaenidae	Feniseca	tarquinius			Fabricius, 1793			Y	Y
1615	Animalia	Arthropoda	Insecta	Lepidoptera	Lycaenidae	Lycaena	hyllus			Cramer, 1775			Y	Y
1616	Animalia	Arthropoda	Insecta	Lepidoptera	Lycaenidae	Satyirum	titus			Fabricius, 1793			Y	Y
1617	Animalia	Arthropoda	Insecta	Lepidoptera	Lycaenidae	Satyrium	acadicum			W. H. Edwards, 1862			Y	Y
1618	Animalia	Arthropoda	Insecta	Lepidoptera	Lycaenidae	Satyrium	calanus			Hübner, 1809			Y	Y
1619	Animalia	Arthropoda	Insecta	Lepidoptera	Lycaenidae	Satyrium	caryaevorus			McDunnough, 1942			Y	Y
1620	Animalia	Arthropoda	Insecta	Lepidoptera	Lycaenidae	Satyrium	liparops			LeConte, 1833			Y	Y
1621	Animalia	Arthropoda	Insecta	Lepidoptera	Lymantriidae	Dasychira	basiflava			Packard, 1864			Y	Y
1622	Animalia	Arthropoda	Insecta	Lepidoptera	Lymantriidae	Orgyia	definita			Packard, 1864			Y	Y
1623	Animalia	Arthropoda	Insecta	Lepidoptera	Lymantriidae	Orgyia	leucostigma			J. E. Smith, 1797			Y	Y
1624	Animalia	Arthropoda	Insecta	Lepidoptera	Momphidae	Mompha	terminella			Humphreys & Westwood, 1845		BOLD:AAX4784	Y		Y	Y	BOLD:AAX4784
1625	Animalia	Arthropoda	Insecta	Lepidoptera	Nepticulidae	Ectoedemia	argyropeza			Zeller, 1839		BOLD:AAC1036	Y		Y	Y	BOLD:AAC1036
1626	Animalia	Arthropoda	Insecta	Lepidoptera	Nepticulidae	Stigmella	microtheriella			Stainton, 1854		BOLD:AAI0007	Y		Y	Y	BOLD:AAI0007
1627	Animalia	Arthropoda	Insecta	Lepidoptera	Nepticulidae	Stigmella	rhamnicola			Braun, 1916		BOLD:AAU7678	Y		Y	Y	BOLD:AAU7678
1628	Animalia	Arthropoda	Insecta	Lepidoptera	Noctuidae	Achatia	distincta			Hübner, 1813		BOLD:AAB7392	Y		Y	Y	BOLD:AAB7392
1629	Animalia	Arthropoda	Insecta	Lepidoptera	Noctuidae	Agrotis	ipsilon			Hufnagel, 1766			Y	Y
1630	Animalia	Arthropoda	Insecta	Lepidoptera	Noctuidae	Agrotis	venerabilis			Walker, 1857			Y	Y
1631	Animalia	Arthropoda	Insecta	Lepidoptera	Noctuidae	Allagrapha	aerea			Hübner, 1803			Y		Y	Y
1632	Animalia	Arthropoda	Insecta	Lepidoptera	Noctuidae	Amphipoea	americana			Speyer, 1875			Y		Y	Y
1633	Animalia	Arthropoda	Insecta	Lepidoptera	Noctuidae	Amphipoea	interoceanica			Smith, 1899			Y		Y	Y
1634	Animalia	Arthropoda	Insecta	Lepidoptera	Noctuidae	Amphipyra	pyramidoides			Guenée, 1852		BOLD:AAA8525	Y		Y	Y	BOLD:AAA8525
1635	Animalia	Arthropoda	Insecta	Lepidoptera	Noctuidae	Anathix	ralla			Grote and Robinson, 1868		BOLD:AAC9569	Y		Y	Y	BOLD:AAC9569
1636	Animalia	Arthropoda	Insecta	Lepidoptera	Noctuidae	Apamea	devastator			Brace, 1819			Y		Y	Y
1637	Animalia	Arthropoda	Insecta	Lepidoptera	Noctuidae	Autographa	precationis			Guenée, 1852			Y	Y
1638	Animalia	Arthropoda	Insecta	Lepidoptera	Noctuidae	Caenurgina	crassiuscula			Haworth, 1809			Y		Y	Y
1639	Animalia	Arthropoda	Insecta	Lepidoptera	Noctuidae	Catocala	cerogama			Guenée, 1852		BOLD:AAB3383	Y		Y	Y	BOLD:AAB3383
1640	Animalia	Arthropoda	Insecta	Lepidoptera	Noctuidae	Catocala	grynea			Cramer, 1779			Y		Y	Y
1641	Animalia	Arthropoda	Insecta	Lepidoptera	Noctuidae	Cerastis	tenebrifera			Walker, 1865		BOLD:AAC1487	Y		Y	Y	BOLD:AAC1487
1642	Animalia	Arthropoda	Insecta	Lepidoptera	Noctuidae	Chrysodeixis	includens			Walker, 1858			Y	Y
1643	Animalia	Arthropoda	Insecta	Lepidoptera	Noctuidae	Crocigrapha	normani			Grote, 1874		BOLD:AAA6924	Y		Y	Y	BOLD:AAA6924
1644	Animalia	Arthropoda	Insecta	Lepidoptera	Noctuidae	Cucullia	asteroides			Guenée, 1852			Y		Y	Y
1645	Animalia	Arthropoda	Insecta	Lepidoptera	Noctuidae	Cucullia	convexipennis			Grote and Robinson, 1868			Y		Y	Y
1646	Animalia	Arthropoda	Insecta	Lepidoptera	Noctuidae	Euplexia	benesimilis			McDunnough, 1922		BOLD:AAA4097	Y		Y	Y	BOLD:AAA4097
1647	Animalia	Arthropoda	Insecta	Lepidoptera	Noctuidae	Eupsilia	devia			Grote, 1875		BOLD:AAD9847	Y		Y	Y	BOLD:AAD9847
1648	Animalia	Arthropoda	Insecta	Lepidoptera	Noctuidae	Feltia	jaculifera			Guenée, 1852			Y		Y	Y
1649	Animalia	Arthropoda	Insecta	Lepidoptera	Noctuidae	Hyppa	xylinoides			Guenée, 1852		BOLD:ABY9574	Y		Y	Y	BOLD:ABY9574
1650	Animalia	Arthropoda	Insecta	Lepidoptera	Noctuidae	Idia	aemula			Hübner, 1814			Y	Y
1651	Animalia	Arthropoda	Insecta	Lepidoptera	Noctuidae	Lacinipolia	meditata			Grote, 1873			Y		Y	Y
1652	Animalia	Arthropoda	Insecta	Lepidoptera	Noctuidae	Lacinipolia	renigera			Stephens, 1829			Y	Y	Y	Y
1653	Animalia	Arthropoda	Insecta	Lepidoptera	Noctuidae	Leucania	commoides			Guenée, 1852			Y		Y	Y
1654	Animalia	Arthropoda	Insecta	Lepidoptera	Noctuidae	Leucania	multilinea			Walker, 1856			Y	Y
1655	Animalia	Arthropoda	Insecta	Lepidoptera	Noctuidae	Leucania	phragmitidicola			Guenée, 1852			Y		Y	Y
1656	Animalia	Arthropoda	Insecta	Lepidoptera	Noctuidae	Leucania	pseudargyria			Guenée, 1852			Y		Y	Y
1657	Animalia	Arthropoda	Insecta	Lepidoptera	Noctuidae	Loscopia	velata			Walker, 1865			Y		Y	Y
1658	Animalia	Arthropoda	Insecta	Lepidoptera	Noctuidae	Macrochilo	absorptalis			Walker, 1859			Y		Y	Y
1659	Animalia	Arthropoda	Insecta	Lepidoptera	Noctuidae	Melanchra	adjuncta			Guenée, 1852		BOLD:ACF4823	Y		Y	Y	BOLD:ACF4823
1660	Animalia	Arthropoda	Insecta	Lepidoptera	Noctuidae	Meropleon	diversicolor			Morrison, 1874			Y	Y
1661	Animalia	Arthropoda	Insecta	Lepidoptera	Noctuidae	Morrisonia	confusa			Hübner, 1831		BOLD:AAA6652	Y		Y	Y	BOLD:AAA6652
1662	Animalia	Arthropoda	Insecta	Lepidoptera	Noctuidae	Mythimna	unipuncta			Haworth, 1809			Y	Y
1663	Animalia	Arthropoda	Insecta	Lepidoptera	Noctuidae	Noctua	pronuba			Linnaeus, 1758			Y	Y	Y	Y
1664	Animalia	Arthropoda	Insecta	Lepidoptera	Noctuidae	Ochropleura	implecta			Lafontaine, 1998			Y	Y
1665	Animalia	Arthropoda	Insecta	Lepidoptera	Noctuidae	Oligia	modica			Guenée, 1852			Y		Y	Y
1666	Animalia	Arthropoda	Insecta	Lepidoptera	Noctuidae	Orthosia	hibisci			Guenée, 1852		BOLD:AAA4128	Y		Y	Y	BOLD:AAA4128
1667	Animalia	Arthropoda	Insecta	Lepidoptera	Noctuidae	Orthosia	rubescens			Walker, 1865		BOLD:AAC0946	Y		Y	Y	BOLD:AAC0946
1668	Animalia	Arthropoda	Insecta	Lepidoptera	Noctuidae	Palthis	angulalis			Hübner, 1796		BOLD:AAA3933	Y		Y	Y	BOLD:AAA3933
1669	Animalia	Arthropoda	Insecta	Lepidoptera	Noctuidae	Peridroma	saucia			Hübner, 1808			Y	Y
1670	Animalia	Arthropoda	Insecta	Lepidoptera	Noctuidae	Phalaenostola	metonalis			Walker, 1859			Y		Y	Y
1671	Animalia	Arthropoda	Insecta	Lepidoptera	Noctuidae	Protodeltote	albidula			Guenée, 1852			Y		Y	Y
1672	Animalia	Arthropoda	Insecta	Lepidoptera	Noctuidae	Pseudohermonassa	bicarnea			Guenée, 1852			Y		Y	Y
1673	Animalia	Arthropoda	Insecta	Lepidoptera	Noctuidae	Renia	adspergillus			Bosc, 1800			Y		Y	Y
1674	Animalia	Arthropoda	Insecta	Lepidoptera	Noctuidae	Striacosta	albicosta			Smith, 1888			Y		Y	Y
1675	Animalia	Arthropoda	Insecta	Lepidoptera	Noctuidae	Sunira	bicolorago			Guenée, 1852		BOLD:AAA4426	Y		Y	Y	BOLD:AAA4426
1676	Animalia	Arthropoda	Insecta	Lepidoptera	Noctuidae	Xestia	smithii			Snellen, 1896		BOLD:AAA2590	Y		Y	Y	BOLD:AAA2590
1677	Animalia	Arthropoda	Insecta	Lepidoptera	Nolidae	Nola	ovilla			Grote, 1875		BOLD:AAD1810	Y		Y	Y	BOLD:AAD1810
1678	Animalia	Arthropoda	Insecta	Lepidoptera	Notodontidae	Schizura	unicornis			J. E. Smith, 1797			Y		Y	Y
1679	Animalia	Arthropoda	Insecta	Lepidoptera	Notodontidae	Symmerista	leucitys			Franclemont, 1946			Y		Y	Y
1680	Animalia	Arthropoda	Insecta	Lepidoptera	Nymphalidae	Aglais	milberti			Godart, 1819			Y	Y
1681	Animalia	Arthropoda	Insecta	Lepidoptera	Nymphalidae	Asterocampa	clyton			Boisduval and Le Conte, 1835			Y	Y
1682	Animalia	Arthropoda	Insecta	Lepidoptera	Nymphalidae	Boloria	Bellona			Fabricius, 1775			Y	Y
1683	Animalia	Arthropoda	Insecta	Lepidoptera	Nymphalidae	Boloria	selene			[Schiffermüller], 1775			Y	Y
1684	Animalia	Arthropoda	Insecta	Lepidoptera	Nymphalidae	Cercyonis	pegala			Fabricius, 1775			Y	Y	Y	Y
1685	Animalia	Arthropoda	Insecta	Lepidoptera	Nymphalidae	Chlosyne	nycteis			E. Doubleday, 1847			Y	Y
1686	Animalia	Arthropoda	Insecta	Lepidoptera	Nymphalidae	Coenonympha	tullia			Müller, 1764			Y	Y
1687	Animalia	Arthropoda	Insecta	Lepidoptera	Nymphalidae	Danaus	plexippus			Linnaeus, 1758			Y	Y	Y
1688	Animalia	Arthropoda	Insecta	Lepidoptera	Nymphalidae	Euphydryas	phaeton			Drury, 1773			Y	Y
1689	Animalia	Arthropoda	Insecta	Lepidoptera	Nymphalidae	Euptoieta	claudia			Cramer, 1775			Y	Y
1690	Animalia	Arthropoda	Insecta	Lepidoptera	Nymphalidae	Junonia	coenia			Hübner, 1822			Y	Y
1691	Animalia	Arthropoda	Insecta	Lepidoptera	Nymphalidae	Lethe	anthedon			A. Clark, 1936			Y	Y
1692	Animalia	Arthropoda	Insecta	Lepidoptera	Nymphalidae	Lethe	appalachia			R. Chermock, 1947			Y	Y
1693	Animalia	Arthropoda	Insecta	Lepidoptera	Nymphalidae	Lethe	eurydice			Linnaeus, 1763			Y	Y
1694	Animalia	Arthropoda	Insecta	Lepidoptera	Nymphalidae	Libytheana	carinenta			Cramer, 1777			Y	Y
1695	Animalia	Arthropoda	Insecta	Lepidoptera	Nymphalidae	Limenitis	archippus			Cramer, 1775			Y	Y
1696	Animalia	Arthropoda	Insecta	Lepidoptera	Nymphalidae	Limenitis	arthemis			Drury, 1773			Y	Y	Y
1697	Animalia	Arthropoda	Insecta	Lepidoptera	Nymphalidae	Megisto	cymela			Cramer, 1777			Y	Y
1698	Animalia	Arthropoda	Insecta	Lepidoptera	Nymphalidae	Nymphalis	antiopa			Linnaeus, 1758			Y	Y
1699	Animalia	Arthropoda	Insecta	Lepidoptera	Nymphalidae	Nymphalis	l-album			[Schiffermüller], 1775			Y	Y
1700	Animalia	Arthropoda	Insecta	Lepidoptera	Nymphalidae	Phyciodes	cocyta			Cramer, 1777			Y	Y
1701	Animalia	Arthropoda	Insecta	Lepidoptera	Nymphalidae	Phyciodes	tharos			Drury, 1773			Y	Y
1702	Animalia	Arthropoda	Insecta	Lepidoptera	Nymphalidae	Polygonia	comma			T. Harris, 1842			Y	Y
1703	Animalia	Arthropoda	Insecta	Lepidoptera	Nymphalidae	Polygonia	interrogationis			Fabricius, 1798			Y	Y
1704	Animalia	Arthropoda	Insecta	Lepidoptera	Nymphalidae	Polygonia	progne			Cramer, 1775			Y	Y
1705	Animalia	Arthropoda	Insecta	Lepidoptera	Nymphalidae	Speyeria	Cybele			Fabricius, 1775			Y	Y
1706	Animalia	Arthropoda	Insecta	Lepidoptera	Nymphalidae	Vanessa	atalanta			Linnaeus, 1758			Y	Y	Y
1707	Animalia	Arthropoda	Insecta	Lepidoptera	Nymphalidae	Vanessa	cardui			Linnaeus, 1758			Y	Y
1708	Animalia	Arthropoda	Insecta	Lepidoptera	Nymphalidae	Vanessa	virginiensis			Drury, 1773			Y	Y
1709	Animalia	Arthropoda	Insecta	Lepidoptera	Papilionidae	Papilio	canadensis			Rothschild and Jordan, 1906			Y		Y
1710	Animalia	Arthropoda	Insecta	Lepidoptera	Papilionidae	Papilio	cresphontes			Cramer, 1777			Y	Y	Y
1711	Animalia	Arthropoda	Insecta	Lepidoptera	Papilionidae	Papilio	glaucus			Linnaeus, 1758			Y	Y
1712	Animalia	Arthropoda	Insecta	Lepidoptera	Papilionidae	Papilio	polyxenes			Fabricius, 1775			Y	Y
1713	Animalia	Arthropoda	Insecta	Lepidoptera	Pieridae	Colias	eurytheme			Boisduval, 1852			Y	Y
1714	Animalia	Arthropoda	Insecta	Lepidoptera	Pieridae	Colias	philodice			Godart, 1819			Y	Y	Y
1715	Animalia	Arthropoda	Insecta	Lepidoptera	Pieridae	Pieris	oleracea			T. Harris, 1829			Y	Y
1716	Animalia	Arthropoda	Insecta	Lepidoptera	Pieridae	Pieris	rapae			Linnaeus, 1758			Y	Y	Y
1717	Animalia	Arthropoda	Insecta	Lepidoptera	Pieridae	Pyrisitia	lisa			Boisduval and Le Conte, 1830			Y	Y
1718	Animalia	Arthropoda	Insecta	Lepidoptera	Plutellidae	Plutella	porrectella			Linnaeus, 1758		BOLD:ACG9804	Y		Y	Y	BOLD:ACG9804
1719	Animalia	Arthropoda	Insecta	Lepidoptera	Plutellidae	Plutella	xylostella			Linnaeus, 1758		BOLD:AAA1513	Y	Y	Y	Y	BOLD:AAA1513
1720	Animalia	Arthropoda	Insecta	Lepidoptera	Psychidae	Psyche	casta			Pallas, 1767		BOLD:ACL8669	Y		Y	Y	BOLD:ACL8669
1721	Animalia	Arthropoda	Insecta	Lepidoptera	Pterophoridae	Gillmeria	pallidactyla			Haworth, 1811			Y	Y
1722	Animalia	Arthropoda	Insecta	Lepidoptera	Pterophoridae	Hellinsia	homodactylus			Walker, 1864			Y		Y	Y
1723	Animalia	Arthropoda	Insecta	Lepidoptera	Pterophoridae	Hellinsia	pectodactylus			Staudinger, 1859			Y		Y	Y
1724	Animalia	Arthropoda	Insecta	Lepidoptera	Sphingidae	Deidamia	inscriptum			Harris, 1839		BOLD:AAB0001	Y		Y	Y	BOLD:AAB0001
1725	Animalia	Arthropoda	Insecta	Lepidoptera	Tischeriidae	Coptotriche	badiiella			Chambers, 1875		BOLD:ACU4456	Y		Y	Y	BOLD:ACU4456
1726	Animalia	Arthropoda	Insecta	Lepidoptera	Tortricidae	Acleris	chalybeana			Fernald, 1882		BOLD:AAA7667	Y		Y	Y	BOLD:AAA7667
1727	Animalia	Arthropoda	Insecta	Lepidoptera	Tortricidae	Acleris	cornana			McDunnough, 1933			Y		Y	Y
1728	Animalia	Arthropoda	Insecta	Lepidoptera	Tortricidae	Ancylis	muricana			Walsingham, 1879		BOLD:AAU7760	Y		Y	Y	BOLD:AAU7760
1729	Animalia	Arthropoda	Insecta	Lepidoptera	Tortricidae	Argyrotaenia	mariana			Fernald, 1882		BOLD:AAA4119	Y		Y	Y	BOLD:AAA4119
1730	Animalia	Arthropoda	Insecta	Lepidoptera	Tortricidae	Choristoneura	rosaceana			Harris, 1841		BOLD:AAA1517	Y		Y	Y	BOLD:AAA1517
1731	Animalia	Arthropoda	Insecta	Lepidoptera	Tortricidae	Cochylis	hoffmanana			Kearfott, 1907		BOLD:AAB3571	Y		Y	Y	BOLD:AAB3571
1732	Animalia	Arthropoda	Insecta	Lepidoptera	Tortricidae	Cochylis	temerana			Busck, 1907		BOLD:AAB7534	Y		Y	Y	BOLD:AAB7534
1733	Animalia	Arthropoda	Insecta	Lepidoptera	Tortricidae	Endothenia	hebesana			Walker, 1863			Y		Y	Y
1734	Animalia	Arthropoda	Insecta	Lepidoptera	Tortricidae	Epinotia	medioviridana			Kearfott, 1908			Y		Y	Y
1735	Animalia	Arthropoda	Insecta	Lepidoptera	Tortricidae	Eucosma	similana			Clemens, 1860			Y		Y	Y
1736	Animalia	Arthropoda	Insecta	Lepidoptera	Tortricidae	Grapholita	prunivora			Walsh, 1868		BOLD:AAG0330	Y		Y	Y	BOLD:AAG0330
1737	Animalia	Arthropoda	Insecta	Lepidoptera	Tortricidae	Olethreutes	atrodentana			Fernald, 1882			Y		Y	Y
1738	Animalia	Arthropoda	Insecta	Lepidoptera	Tortricidae	Olethreutes	fasciatana			Clemens, 1860			Y		Y	Y
1739	Animalia	Arthropoda	Insecta	Lepidoptera	Tortricidae	Olethreutes	permundana			Clemens, 1860			Y		Y	Y
1740	Animalia	Arthropoda	Insecta	Lepidoptera	Tortricidae	Pandemis	lamprosana			Robinson, 1869			Y		Y	Y
1741	Animalia	Arthropoda	Insecta	Lepidoptera	Tortricidae	Phaneta	ochrocephala			Walsingham, 1895			Y		Y	Y
1742	Animalia	Arthropoda	Insecta	Lepidoptera	Tortricidae	Phaneta	parmatana			Clemens, 1860			Y		Y	Y
1743	Animalia	Arthropoda	Insecta	Lepidoptera	Tortricidae	Phaneta	tomonana			Kearfott, 1907			Y		Y	Y
1744	Animalia	Arthropoda	Insecta	Lepidoptera	Tortricidae	Platynota	idaeusalis			Walker, 1859		BOLD:ABY7901	Y		Y	Y	BOLD:ABY7901
1745	Animalia	Arthropoda	Insecta	Lepidoptera	Tortricidae	Pristerognatha	fuligana			Denis & Schiffermüller, 1775		BOLD:AAC7661	Y		Y	Y	BOLD:AAC7661
1746	Animalia	Arthropoda	Insecta	Lepidoptera	Tortricidae	Proteoteras	aesculana			Riley, 1881		BOLD:AAA6740	Y		Y	Y	BOLD:AAA6740
1747	Animalia	Arthropoda	Insecta	Mantodea	Mantidae	Mantis	religiosa	religiosa		Linnaeus, 1758			Y	Y
1748	Animalia	Arthropoda	Insecta	Mecoptera	Bittacidae	Bittacus	strigosus			Hagen, 1861			Y		Y	Y
1749	Animalia	Arthropoda	Insecta	Mecoptera	Panorpidae	Panorpa	galerita			Byers, 1962			Y	Y
1750	Animalia	Arthropoda	Insecta	Mecoptera	Panorpidae	Panorpa	latipennis			Hine, 1901			Y	Y
1751	Animalia	Arthropoda	Insecta	Mecoptera	Panorpidae	Panorpa	subfurcata			Westwood, 1846			Y	Y	Y	Y
1752	Animalia	Arthropoda	Insecta	Neuroptera	Chrysopidae	Chrysopa	oculata			Say, 1839			Y	Y	Y	Y
1753	Animalia	Arthropoda	Insecta	Neuroptera	Hemerobiidae	Hemerobius	humulinus			Linnaeus, 1758		BOLD:AAG0892|BOLD:AAN7492	Y		Y	Y	BOLD:AAG0892|BOLD:AAN7492
1754	Animalia	Arthropoda	Insecta	Neuroptera	Hemerobiidae	Hemerobius	stigma			Stephens, 1836		BOLD:AAG0891	Y		Y	Y	BOLD:AAG0891
1755	Animalia	Arthropoda	Insecta	Neuroptera	Hemerobiidae	Micromus	posticus			Walker, 1853		BOLD:AAG0906	Y		Y	Y	BOLD:AAG0906
1756	Animalia	Arthropoda	Insecta	Odonata	Aeshnidae	Aeshna	umbrosa			Walker, 1908			Y	Y
1757	Animalia	Arthropoda	Insecta	Odonata	Aeshnidae	Anax	junius			Drury, 1773			Y	Y
1758	Animalia	Arthropoda	Insecta	Odonata	Calopterygidae	Hetaerina	americana			Fabricius, 1798			Y	Y
1759	Animalia	Arthropoda	Insecta	Odonata	Coenagrionidae	Argia	moesta			Hagen, 1861			Y	Y
1760	Animalia	Arthropoda	Insecta	Odonata	Coenagrionidae	Enallagma	antennatum			Say, 1839			Y		Y	Y
1761	Animalia	Arthropoda	Insecta	Odonata	Coenagrionidae	Enallagma	civile			Hagen, 1861			Y	Y
1762	Animalia	Arthropoda	Insecta	Odonata	Coenagrionidae	Enallagma	ebrium			Hagen, 1861			Y	Y
1763	Animalia	Arthropoda	Insecta	Odonata	Coenagrionidae	Enallagma	exsulans			Hagen, 1861			Y		Y	Y
1764	Animalia	Arthropoda	Insecta	Odonata	Coenagrionidae	Enallagma	geminatum			Kellicott, 1895			Y		Y	Y
1765	Animalia	Arthropoda	Insecta	Odonata	Coenagrionidae	Enallagma	signatum			Hagen, 1861			Y		Y	Y
1766	Animalia	Arthropoda	Insecta	Odonata	Coenagrionidae	Ischnura	kellicotti			Williamson, 1898			Y		Y	Y
1767	Animalia	Arthropoda	Insecta	Odonata	Coenagrionidae	Ischnura	posita			Hagen, 1861			Y	Y
1768	Animalia	Arthropoda	Insecta	Odonata	Coenagrionidae	Ishnura	verticalis			Say, 1839			Y	Y
1769	Animalia	Arthropoda	Insecta	Odonata	Coenagrionidae	Nehalennia	irene			Hagen, 1861			Y		Y	Y
1770	Animalia	Arthropoda	Insecta	Odonata	Lestidae	Lestes	disjunctus			Selys, 1862			Y	Y
1771	Animalia	Arthropoda	Insecta	Odonata	Lestidae	Lestes	rectangularis			Say, 1839			Y	Y
1772	Animalia	Arthropoda	Insecta	Odonata	Libellulidae	Erythemis	simplicicollis			Say, 1839			Y	Y
1773	Animalia	Arthropoda	Insecta	Odonata	Libellulidae	Libellula	luctuosa			Burmeister, 1839			Y		Y	Y
1774	Animalia	Arthropoda	Insecta	Odonata	Libellulidae	Libellula	pulchella			Drury, 1773			Y	Y
1775	Animalia	Arthropoda	Insecta	Odonata	Libellulidae	Libellula	quadrimaculata			Linnaeus, 1758			Y	Y
1776	Animalia	Arthropoda	Insecta	Odonata	Libellulidae	Pachydiplax	longipennis			Burmeister, 1839			Y	Y
1777	Animalia	Arthropoda	Insecta	Odonata	Libellulidae	Plathemis	lydia			Drury, 1773			Y	Y
1778	Animalia	Arthropoda	Insecta	Odonata	Libellulidae	Sympetrum	internum			Montgomery, 1943			Y	Y
1779	Animalia	Arthropoda	Insecta	Odonata	Libellulidae	Sympetrum	obtrusum			Hagen, 1867			Y	Y
1780	Animalia	Arthropoda	Insecta	Odonata	Libellulidae	Sympetrum	semicinctum			Say, 1839			Y	Y
1781	Animalia	Arthropoda	Insecta	Odonata	Libellulidae	Tramea	lacerat			Hagen, 1861			Y	Y
1782	Animalia	Arthropoda	Insecta	Orthoptera	Acrididae	Cholealtis	conspera			Harris, 1841			Y	Y
1783	Animalia	Arthropoda	Insecta	Orthoptera	Acrididae	Chorthippus	curtipennis			Harris, 1835			Y		Y	Y
1784	Animalia	Arthropoda	Insecta	Orthoptera	Acrididae	Chortophaga	viridifasciata			De Geer, 1773			Y	Y
1785	Animalia	Arthropoda	Insecta	Orthoptera	Acrididae	Dissosteira	carolina			Linnaeus, 1758			Y		Y	Y
1786	Animalia	Arthropoda	Insecta	Orthoptera	Acrididae	Dissosteria	carolina			Linnaeus, 1758			Y	Y
1787	Animalia	Arthropoda	Insecta	Orthoptera	Acrididae	Melanoplus	bivatattus			Say, 1825			Y	Y
1788	Animalia	Arthropoda	Insecta	Orthoptera	Acrididae	Melanoplus	sanguinipes	sanguinipes		Fabricius, 1798			Y	Y
1789	Animalia	Arthropoda	Insecta	Orthoptera	Acrididae	Melanoplus	sp.						N	Y
1790	Animalia	Arthropoda	Insecta	Orthoptera	Gryllidae	Allonemobius	fasciatus			De Geer, 1773			Y	Y
1791	Animalia	Arthropoda	Insecta	Orthoptera	Gryllidae	Gryllus	veletis			Alexander and Bigelow, 1960			Y	Y
1792	Animalia	Arthropoda	Insecta	Orthoptera	Gryllidae	Oecanthus	nigricornis			F. Walker, 1869			Y		Y	Y
1793	Animalia	Arthropoda	Insecta	Orthoptera	Gryllidae	Oecanthus	quadripunctatus			Beutenmuller, 1894			Y	Y
1794	Animalia	Arthropoda	Insecta	Orthoptera	Tetrigidae	Tetrix	arenonsum	angusta		Hancock, 1896			Y	Y
1795	Animalia	Arthropoda	Insecta	Orthoptera	Tetrigidae	Tetrix	subulata			Linnaeus, 1761			Y	Y
1796	Animalia	Arthropoda	Insecta	Orthoptera	Tetrigoniidae	Conocephalus	brevipennis			Scudder, 1863			Y	Y
1797	Animalia	Arthropoda	Insecta	Orthoptera	Tetrigoniidae	Scudderia	sp.						N	Y
1798	Animalia	Arthropoda	Insecta	Phasmatodea	Heteronemiidae	Diapheromera	femorata			Say, 1824			Y		Y	Y
1799	Animalia	Arthropoda	Insecta	Plecoptera	Chloroperlidae	Sweltsa	onkos			Ricker, 1935			Y		Y	Y
1800	Animalia	Arthropoda	Insecta	Psocoptera	Amphipsocidae	Polypsocus	corruptus			Hagen, 1861			Y		Y	Y
1801	Animalia	Arthropoda	Insecta	Psocoptera	Caeciliidae	Caecillius	sp.						N	Y
1802	Animalia	Arthropoda	Insecta	Psocoptera	Caeciliusidae	Valenzuela	flavidus			Stephens, 1836		BOLD:AAH3228|BOLD:AAN8447	Y		Y	Y	BOLD:AAH3228|BOLD:AAN8447
1803	Animalia	Arthropoda	Insecta	Psocoptera	Ectopsocidae	Ectopsocus	meridionalis			Ribaga, 1904			Y	Y	Y	Y
1804	Animalia	Arthropoda	Insecta	Psocoptera	Mesopsocidae	Mesopsocus	unipunctatus			Müller, 1764			Y	Y
1805	Animalia	Arthropoda	Insecta	Psocoptera	Peripsocidae	Peripsocus	subfasciatus			Rambur, 1842			Y	Y
1806	Animalia	Arthropoda	Insecta	Psocoptera	Psocidae	Blaste	opposita			Banks, 1907			Y	Y
1807	Animalia	Arthropoda	Insecta	Psocoptera	Psocidae	Metylophorus	novaescotiae			Walker, 1853			Y	Y
1808	Animalia	Arthropoda	Insecta	Psocoptera	Stenopsocidae	Graphopsocus	cruciatus			Linnaeus, 1768		BOLD:ACA2933|BOLD:ACB0984	Y		Y	Y	BOLD:ACA2933|BOLD:ACB0984
1809	Animalia	Arthropoda	Insecta	Thysanoptera	Aeolothripidae	Aeolothrips	ericae			Bagnall, 1920		BOLD:ABA2981	Y		Y	Y	BOLD:ABA2981
1810	Animalia	Arthropoda	Insecta	Thysanoptera	Phlaeothripidae	Haplothrips	verbasci			Osborn, 1897		BOLD:AAI6861	Y		Y	Y	BOLD:AAI6861
1811	Animalia	Arthropoda	Insecta	Thysanoptera	Thripidae	Chirothrips	manicatus			Haliday, 1836			Y		Y	Y
1812	Animalia	Arthropoda	Insecta	Thysanoptera	Thripidae	Odontothrips	biuncus			John, 1921			Y		Y	Y
1813	Animalia	Arthropoda	Insecta	Thysanoptera	Thripidae	Taeniothrips	inconsequens			Uzel, 1895		BOLD:ACC0651	Y		Y	Y	BOLD:ACC0651
1814	Animalia	Arthropoda	Insecta	Trichoptera	Helicopsychidae	Helicopsyche	borealis			Hagen, 1861			Y		Y	Y
1815	Animalia	Arthropoda	Insecta	Trichoptera	Hydropsychidae	Ceratopsyche	morosa			Hagen, 1861		BOLD:AAA3679	Y		Y	Y	BOLD:AAA3679
1816	Animalia	Arthropoda	Insecta	Trichoptera	Hydropsychidae	Cheumatopsyche	campyla			Ross, 1938		BOLD:AAA3892|BOLD:ACE5263	Y		Y	Y	BOLD:AAA3892|BOLD:ACE5263
1817	Animalia	Arthropoda	Insecta	Trichoptera	Hydropsychidae	Hydropsyche	phalerata			Hagen, 1861		BOLD:AAC3243	Y		Y	Y	BOLD:AAC3243
1818	Animalia	Arthropoda	Insecta	Trichoptera	Hydroptilidae	Agraylea	multipunctata			Curtis, 1834			Y		Y	Y
1819	Animalia	Arthropoda	Insecta	Trichoptera	Hydroptilidae	Hydroptila	armata			Ross, 1938			Y		Y	Y
1820	Animalia	Arthropoda	Insecta	Trichoptera	Hydroptilidae	Hydroptila	perdita			Morton, 1905		BOLD:AAE5187	Y		Y	Y	BOLD:AAE5187
1821	Animalia	Arthropoda	Insecta	Trichoptera	Hydroptilidae	Hydroptila	spatulata			Morton, 1905		BOLD:AAD0137	Y		Y	Y	BOLD:AAD0137
1822	Animalia	Arthropoda	Insecta	Trichoptera	Hydroptilidae	Orthotrichia	cristata			Morton, 1905			Y		Y	Y
1823	Animalia	Arthropoda	Insecta	Trichoptera	Leptoceridae	Oecetis	avara			Banks, 1895			Y		Y	Y
1824	Animalia	Arthropoda	Insecta	Trichoptera	Leptoceridae	Oecetis	cinerascens			Hagen, 1861			Y		Y	Y
1825	Animalia	Arthropoda	Insecta	Trichoptera	Leptoceridae	Oecetis	inconspicua			Walker, 1852		BOLD:AAA1532	Y		Y	Y	BOLD:AAA1532
1826	Animalia	Arthropoda	Insecta	Trichoptera	Leptoceridae	Oecetis	nocturna			Ross, 1966			Y		Y	Y
1827	Animalia	Arthropoda	Insecta	Trichoptera	Limnephilidae	Ironoquia	punctatissima			Walker, 1852			Y		Y	Y
1828	Animalia	Arthropoda	Insecta	Trichoptera	Limnephilidae	Pycnopsyche	antica			Walker, 1852			Y		Y	Y
1829	Animalia	Arthropoda	Insecta	Trichoptera	Phryganeidae	Banksiola	crotchi			Banks, 1944			Y		Y	Y
1830	Animalia	Arthropoda	Insecta	Trichoptera	Polycentropodidae	Plectrocnemia	cinerea			Hagen, 1861		BOLD:AAA3441|BOLD:ACL7631	Y		Y	Y	BOLD:AAA3441|BOLD:ACL7631
1831	Animalia	Arthropoda	Malacostraca	Amphipoda	Hyalellidae	Hyalella	azteca			Saussure, 1858			Y		Y	Y
1832	Animalia	Arthropoda	Malacostraca	Decapoda	Cambaridae	Orconectes	propinquus			Girard, 1852			Y		Y	Y
1833	Animalia	Arthropoda	Malacostraca	Isopoda	Trachelipodidae	Trachelipus	rathkii			Brandt, 1833		BOLD:AAH4102	Y		Y	Y	BOLD:AAH4102
1834	Animalia	Arthropoda	Malacostraca	Isopoda	Trichoniscidae	Hyloniscus	riparius			Koch, 1838		BOLD:AAV6495	Y		Y	Y	BOLD:AAV6495
1835	Animalia	Arthropoda	Malacostraca	Isopoda	Trichoniscidae	Trichoniscus	pusillus			Brandt, 1833		BOLD:AAN7523	Y		Y	Y	BOLD:AAN7523
1836	Animalia	Chordata	Actinopterygii	Cypriniformes	Catostomidae	Catostomus	catostomus			Forster, 1773			Y	Y
1837	Animalia	Chordata	Actinopterygii	Cypriniformes	Catostomidae	Catostomus	commersonii			Lacepède, 1803			Y	Y	Y
1838	Animalia	Chordata	Actinopterygii	Cypriniformes	Catostomidae	Hypentelium	nigricans			Lesueur, 1817			Y	Y
1839	Animalia	Chordata	Actinopterygii	Cypriniformes	Catostomidae	Moxostoma	erythrurum			Rafinesque, 1818			Y	Y
1840	Animalia	Chordata	Actinopterygii	Cypriniformes	Catostomidae	Moxostoma	valenciennesi			Jordan, 1885			Y	Y
1841	Animalia	Chordata	Actinopterygii	Cypriniformes	Cyprinidae	Cyprinella	spiloptera			Cope, 1867			Y	Y
1842	Animalia	Chordata	Actinopterygii	Cypriniformes	Cyprinidae	Cyprinus	carpio			Linnaeus, 1758			Y	Y
1843	Animalia	Chordata	Actinopterygii	Cypriniformes	Cyprinidae	Luxilus	chrysocephalus			Rafinesque, 1820			Y	Y	Y
1844	Animalia	Chordata	Actinopterygii	Cypriniformes	Cyprinidae	Luxilus	cornutus			Mitchill, 1817			Y	Y	Y
1845	Animalia	Chordata	Actinopterygii	Cypriniformes	Cyprinidae	Nocomis	biguttatus			Kirtland, 1840			Y	Y
1846	Animalia	Chordata	Actinopterygii	Cypriniformes	Cyprinidae	Nocomis	micropogon			Cope, 1865			Y		Y
1847	Animalia	Chordata	Actinopterygii	Cypriniformes	Cyprinidae	Notropis	heterodon			Cope, 1865			Y		Y
1848	Animalia	Chordata	Actinopterygii	Cypriniformes	Cyprinidae	Notropis	photogenis			Cope, 1865			Y	Y
1849	Animalia	Chordata	Actinopterygii	Cypriniformes	Cyprinidae	Pimephales	notatus			Rafinesque, 1820			Y	Y
1850	Animalia	Chordata	Actinopterygii	Cypriniformes	Cyprinidae	Rhinichthys	atratulus			Hermann, 1804			Y	Y
1851	Animalia	Chordata	Actinopterygii	Cypriniformes	Cyprinidae	Semotilus	atromaculatus			Mitchill, 1818			Y	Y
1852	Animalia	Chordata	Actinopterygii	Esociformes	Esocidae	Esox	lucius			Linnaeus, 1758			Y	Y
1853	Animalia	Chordata	Actinopterygii	Gasterosteiformes	Gasterosteidae	Culaea	inconstans			Kirtland, 1840			Y		Y
1854	Animalia	Chordata	Actinopterygii	Perciformes	Centrarchidae	Ambloplites	rupestris			Rafinesque, 1817			Y	Y	Y
1855	Animalia	Chordata	Actinopterygii	Perciformes	Centrarchidae	Lepomis	gibbosus			Linnaeus, 1758			Y	Y	Y
1856	Animalia	Chordata	Actinopterygii	Perciformes	Centrarchidae	Micropterus	dolomieu			Lacepède, 1802			Y	Y	Y
1857	Animalia	Chordata	Actinopterygii	Perciformes	Centrarchidae	Micropterus	salmoides			Lacepède, 1802			Y	Y	Y
1858	Animalia	Chordata	Actinopterygii	Perciformes	Centrarchidae	Pomoxis	nigromaculatus			Lesueur in Cuvier and Valenciennes, 1829			Y	Y
1859	Animalia	Chordata	Actinopterygii	Perciformes	Percidae	Etheostoma	blennioides			Rafinesque, 1819			Y	Y	Y
1860	Animalia	Chordata	Actinopterygii	Perciformes	Percidae	Etheostoma	exile			Girard, 1859			Y	Y
1861	Animalia	Chordata	Actinopterygii	Perciformes	Percidae	Etheostoma	nigrum			Rafinesque, 1820			Y	Y	Y
1862	Animalia	Chordata	Actinopterygii	Perciformes	Percidae	Perca	flavescens			Mitchill, 1814			Y	Y	Y
1863	Animalia	Chordata	Actinopterygii	Perciformes	Percidae	Percina	maculata			Girard, 1859			Y	Y	Y
1864	Animalia	Chordata	Actinopterygii	Salmoniformes	Salmonidae	Salvelinus	fontinalis			Mitchill, 1814			Y	Y
1865	Animalia	Chordata	Actinopterygii	Siluriformes	Ictaluridae	Ameiurus	nebulosus			Lesueur, 1819			Y	Y
1866	Animalia	Chordata	Actinopterygii	Siluriformes	Ictaluridae	Noturus	flavus			Rafinesque, 1818			Y	Y
1867	Animalia	Chordata	Amphibia	Anura	Bufonidae	Anaxyrus	americanus			Holbrook, 1836			Y	Y	Y
1868	Animalia	Chordata	Amphibia	Anura	Hylidae	Hyla	versicolor			LeConte, 1825			Y	Y
1869	Animalia	Chordata	Amphibia	Anura	Hylidae	Pseudacris	crucifer			Wied-Neuwied, 1838			Y	Y
1870	Animalia	Chordata	Amphibia	Anura	Hylidae	Pseudacris	triseriata			Wied-Neuwied, 1838			Y	Y
1871	Animalia	Chordata	Amphibia	Anura	Ranidae	Lithobates	catesbeiana			Shaw, 1802			Y	Y
1872	Animalia	Chordata	Amphibia	Anura	Ranidae	Lithobates	clamitans			Latreille in Sonnini de Manoncourt and Latreille, 1801			Y	Y
1873	Animalia	Chordata	Amphibia	Anura	Ranidae	Lithobates	pipiens			Schreber, 1782			Y	Y
1874	Animalia	Chordata	Amphibia	Anura	Ranidae	Lithobates	sylvatica			LeConte, 1825			Y	Y
1875	Animalia	Chordata	Amphibia	Caudata	Ambystomidae	Ambystoma	jeffersonianum x laterale		hybrid species: jefferson and blue-spotted	Green, 1827 and Hallowell, 1856			Y	Y
1876	Animalia	Chordata	Amphibia	Caudata	Ambystomidae	Ambystoma	laterale			Hallowell, 1856			Y	Y
1877	Animalia	Chordata	Amphibia	Caudata	Ambystomidae	Ambystoma	maculatum			Shaw, 1802			Y	Y
1878	Animalia	Chordata	Amphibia	Caudata	Plethodontidae	Hemidactylium	scutatum			Temminck and Schlegel, 1838			Y	Y
1879	Animalia	Chordata	Amphibia	Caudata	Plethodontidae	Plethodon	cinereus			Green, 1818			Y	Y	Y
1880	Animalia	Chordata	Aves	Anseriformes	Anatidae	Aix	sponsa			Linnaeus, 1758			Y	Y	Y
1881	Animalia	Chordata	Aves	Anseriformes	Anatidae	Anas	acuta			Linnaeus, 1758			Y	Y
1882	Animalia	Chordata	Aves	Anseriformes	Anatidae	Anas	americana			Gmelin, 1789			Y	Y
1883	Animalia	Chordata	Aves	Anseriformes	Anatidae	Anas	clypeata			Linnaeus, 1758			Y	Y
1884	Animalia	Chordata	Aves	Anseriformes	Anatidae	Anas	crecca			Linnaeus, 1758			Y	Y	Y
1885	Animalia	Chordata	Aves	Anseriformes	Anatidae	Anas	discors			Linnaeus, 1766			Y	Y	Y
1886	Animalia	Chordata	Aves	Anseriformes	Anatidae	Anas	platyrhynchos			Linnaeus, 1758			Y	Y	Y
1887	Animalia	Chordata	Aves	Anseriformes	Anatidae	Anas	rubripes			Brewster, 1902			Y	Y	Y
1888	Animalia	Chordata	Aves	Anseriformes	Anatidae	Anas	strepera			Linnaeus, 1758			Y	Y
1889	Animalia	Chordata	Aves	Anseriformes	Anatidae	Aythya	affinis			Eyton, 1838			Y	Y
1890	Animalia	Chordata	Aves	Anseriformes	Anatidae	Aythya	americana			Eyton, 1838			Y	Y
1891	Animalia	Chordata	Aves	Anseriformes	Anatidae	Aythya	collaris			Donovan, 1809			Y	Y
1892	Animalia	Chordata	Aves	Anseriformes	Anatidae	Aythya	marila			Linnaeus, 1761			Y	Y
1893	Animalia	Chordata	Aves	Anseriformes	Anatidae	Aythya	valisineria			A. Wilson, 1814			Y	Y
1894	Animalia	Chordata	Aves	Anseriformes	Anatidae	Branta	bernicla			Linnaeus, 1758			Y	Y
1895	Animalia	Chordata	Aves	Anseriformes	Anatidae	Branta	canadensis			Linnaeus, 1758			Y	Y	Y
1896	Animalia	Chordata	Aves	Anseriformes	Anatidae	Branta	hutchinsii			Richardson, 1832			Y	Y
1897	Animalia	Chordata	Aves	Anseriformes	Anatidae	Bucephala	albeola			Linnaeus, 1758			Y	Y
1898	Animalia	Chordata	Aves	Anseriformes	Anatidae	Bucephala	clangula			Linnaeus, 1758			Y	Y
1899	Animalia	Chordata	Aves	Anseriformes	Anatidae	Chen	caerulescens			Linnaeus, 1758			Y	Y
1900	Animalia	Chordata	Aves	Anseriformes	Anatidae	Clangula	hyemalis			Linnaeus, 1758			Y	Y
1901	Animalia	Chordata	Aves	Anseriformes	Anatidae	Cygnus	buccinator			Richardson, 1831			Y	Y
1902	Animalia	Chordata	Aves	Anseriformes	Anatidae	Cygnus	columbianus			Ord, 1815			Y	Y
1903	Animalia	Chordata	Aves	Anseriformes	Anatidae	Cygnus	olor			Gmelin, 1789			Y	Y
1904	Animalia	Chordata	Aves	Anseriformes	Anatidae	Lophodytes	cucullatus			Linnaeus, 1758			Y	Y
1905	Animalia	Chordata	Aves	Anseriformes	Anatidae	Melanerpes	erythrocephalus			Linnaeus, 1758			Y	Y
1906	Animalia	Chordata	Aves	Anseriformes	Anatidae	Mergus	merganser			Linnaeus, 1758			Y	Y
1907	Animalia	Chordata	Aves	Anseriformes	Anatidae	Mergus	serrator			Linnaeus, 1758			Y	Y
1908	Animalia	Chordata	Aves	Anseriformes	Anatidae	Oxyura	jamaicensis			Gmelin, 1789			Y	Y
1909	Animalia	Chordata	Aves	Apodiformes	Apodidae	Chaetura	pelagica			Linnaeus, 1758			Y	Y	Y
1910	Animalia	Chordata	Aves	Apodiformes	Trochilidae	Archilochus	colubris			Linnaeus, 1758			Y	Y	Y
1911	Animalia	Chordata	Aves	Caprimulgiformes	Caprimulgidae	Caprimulgus	vociferus			A. Wilson, 1812			Y	Y
1912	Animalia	Chordata	Aves	Caprimulgiformes	Caprimulgidae	Chordeiles	minor			J. R. Forster, 1771			Y	Y
1913	Animalia	Chordata	Aves	Charadriiformes	Charadriidae	Charadrius	semipalmatus			Bonaparte, 1825			Y	Y
1914	Animalia	Chordata	Aves	Charadriiformes	Charadriidae	Charadrius	vociferus			Linnaeus, 1758			Y	Y	Y
1915	Animalia	Chordata	Aves	Charadriiformes	Laridae	Chroicocephalus	philadelphia			Ord, 1815			Y	Y
1916	Animalia	Chordata	Aves	Charadriiformes	Laridae	Larus	delawarensis			Ord, 1815			Y	Y	Y
1917	Animalia	Chordata	Aves	Charadriiformes	Laridae	Larus	fuscus			Linnaeus, 1758			Y	Y
1918	Animalia	Chordata	Aves	Charadriiformes	Laridae	Larus	glaucoides			B. Meyer, 1822			Y	Y
1919	Animalia	Chordata	Aves	Charadriiformes	Laridae	Larus	hyperboreus			Gunnerus, 1767			Y	Y
1920	Animalia	Chordata	Aves	Charadriiformes	Laridae	Larus	marinus			Linnaeus, 1758			Y	Y
1921	Animalia	Chordata	Aves	Charadriiformes	Laridae	Larus	smithsonianus			Coues, 1862			Y	Y	Y
1922	Animalia	Chordata	Aves	Charadriiformes	Laridae	Larus	thayeri			W. S. Brooks, 1915			Y	Y
1923	Animalia	Chordata	Aves	Charadriiformes	Laridae	Mniotilta	varia			Linnaeus, 1766			Y	Y
1924	Animalia	Chordata	Aves	Charadriiformes	Laridae	Sterna	hirundo			Linnaeus, 1758			Y	Y
1925	Animalia	Chordata	Aves	Charadriiformes	Scolopacidae	Actitis	macularius			Linnaeus, 1766			Y	Y	Y
1926	Animalia	Chordata	Aves	Charadriiformes	Scolopacidae	Arenaria	interpres			Linnaeus, 1758			N	Y
1927	Animalia	Chordata	Aves	Charadriiformes	Scolopacidae	Bartramia	longicauda			Bechstein, 1812			Y	Y
1928	Animalia	Chordata	Aves	Charadriiformes	Scolopacidae	Calidris	alpina			Linnaeus, 1758			Y	Y
1929	Animalia	Chordata	Aves	Charadriiformes	Scolopacidae	Calidris	bairdii			Coues, 1861			Y	Y
1930	Animalia	Chordata	Aves	Charadriiformes	Scolopacidae	Calidris	melanotos			Vieillot, 1819			Y	Y
1931	Animalia	Chordata	Aves	Charadriiformes	Scolopacidae	Calidris	minutilla			Vieillot, 1819			Y	Y	Y
1932	Animalia	Chordata	Aves	Charadriiformes	Scolopacidae	Calidris	pusilla			Linnaeus, 1766			Y	Y
1933	Animalia	Chordata	Aves	Charadriiformes	Scolopacidae	Gallinago	delicata			Ord, 1825			Y	Y
1934	Animalia	Chordata	Aves	Charadriiformes	Scolopacidae	Scolopax	minor			Gmelin, 1789			Y	Y
1935	Animalia	Chordata	Aves	Charadriiformes	Scolopacidae	Tringa	flavipes			Gmelin, 1789			Y	Y	Y
1936	Animalia	Chordata	Aves	Charadriiformes	Scolopacidae	Tringa	melanoleuca			Gmelin, 1789			Y	Y	Y
1937	Animalia	Chordata	Aves	Charadriiformes	Scolopacidae	Tringa	solitaria			A. Wilson, 1813			Y	Y
1938	Animalia	Chordata	Aves	Charadriiformes	Sternidae	Hydroprogne	caspia			Pallas, 1770			Y	Y	Y
1939	Animalia	Chordata	Aves	Ciconiiformes	Ardeidae	Ardea	alba			Linnaeus, 1758			Y	Y	Y
1940	Animalia	Chordata	Aves	Ciconiiformes	Ardeidae	Ardea	herodias			Linnaeus, 1758			Y	Y	Y
1941	Animalia	Chordata	Aves	Ciconiiformes	Ardeidae	Botaurus	lentiginosus			Rackett, 1813			Y	Y
1942	Animalia	Chordata	Aves	Ciconiiformes	Ardeidae	Butorides	virescens			Linnaeus, 1758			Y	Y
1943	Animalia	Chordata	Aves	Ciconiiformes	Ardeidae	Chlidonias	niger			Linnaeus, 1758			Y	Y
1944	Animalia	Chordata	Aves	Ciconiiformes	Ardeidae	Egretta	caerulea			Linnaeus, 1758			Y	Y
1945	Animalia	Chordata	Aves	Columbiformes	Columbidae	Columba	livia			Gmelin, 1789			Y	Y	Y
1946	Animalia	Chordata	Aves	Columbiformes	Columbidae	Zenaida	macroura			(Linnaeus, 1758)			Y	Y	Y
1947	Animalia	Chordata	Aves	Coraciiformes	Alcedinidae	Megaceryle	alcyon			Linnaeus, 1758			Y	Y	Y
1948	Animalia	Chordata	Aves	Cuculiformes	Cuculidae	Coccyzus	americanus			Linnaeus, 1758			Y	Y
1949	Animalia	Chordata	Aves	Cuculiformes	Cuculidae	Coccyzus	erythropthalmus			A. Wilson, 1811			Y	Y	Y
1950	Animalia	Chordata	Aves	Falconiformes	Accipitridae	Accipiter	cooperii			Bonaparte, 1828			Y	Y	Y
1951	Animalia	Chordata	Aves	Falconiformes	Accipitridae	Accipiter	gentilis			Linnaeus, 1758			Y	Y
1952	Animalia	Chordata	Aves	Falconiformes	Accipitridae	Accipiter	striatus			Vieillot, 1808			Y	Y	Y
1953	Animalia	Chordata	Aves	Falconiformes	Accipitridae	Agelaius	phoeniceus			Linnaeus, 1766			Y	Y	Y
1954	Animalia	Chordata	Aves	Falconiformes	Accipitridae	Aquila	chrysaetos			Linnaeus, 1758			Y	Y
1955	Animalia	Chordata	Aves	Falconiformes	Accipitridae	Buteo	jamaicensis			Gmelin, 1788			Y	Y	Y
1956	Animalia	Chordata	Aves	Falconiformes	Accipitridae	Buteo	lagopus			Pontoppidan, 1763			Y	Y
1957	Animalia	Chordata	Aves	Falconiformes	Accipitridae	Buteo	lineatus			Gmelin, 1788			Y	Y
1958	Animalia	Chordata	Aves	Falconiformes	Accipitridae	Buteo	platypterus			Vieillot, 1823			Y	Y
1959	Animalia	Chordata	Aves	Falconiformes	Accipitridae	Circus	cyaneus			Linnaeus, 1766			Y	Y
1960	Animalia	Chordata	Aves	Falconiformes	Accipitridae	Haliaeetus	leucocephalus			Linnaeus, 1766			Y	Y	Y
1961	Animalia	Chordata	Aves	Falconiformes	Cathartidae	Cathartes	aura			Linnaeus, 1758			Y	Y	Y
1962	Animalia	Chordata	Aves	Falconiformes	Falconidae	Falco	columbarius			Linnaeus, 1758			Y	Y	Y
1963	Animalia	Chordata	Aves	Falconiformes	Falconidae	Falco	peregrinus			Tunstall, 1771			Y	Y
1964	Animalia	Chordata	Aves	Falconiformes	Falconidae	Falco	sparverius			Linnaeus, 1758			Y	Y
1965	Animalia	Chordata	Aves	Falconiformes	Pandionidae	Pandion	haliaetus			Linnaeus, 1758			Y	Y	Y
1966	Animalia	Chordata	Aves	Galliformes	Odontophoridae	Colinus	virginianus			Linnaeus, 1758			Y	Y
1967	Animalia	Chordata	Aves	Galliformes	Phasianidae	Bonasa	umbellus			Linnaeus, 1766			Y	Y
1968	Animalia	Chordata	Aves	Galliformes	Phasianidae	Meleagris	gallopavo			Linnaeus, 1758			Y	Y	Y
1969	Animalia	Chordata	Aves	Galliformes	Phasianidae	Phasianus	colchicus			Linnaeus, 1758			Y	Y
1970	Animalia	Chordata	Aves	Gaviiformes	Gaviidae	Gavia	immer			Brunnich, 1764			Y	Y
1971	Animalia	Chordata	Aves	Gruiformes	Gruidae	Grus	canadensis			Linnaeus, 1758			Y	Y
1972	Animalia	Chordata	Aves	Gruiformes	Rallidae	Fulica	americana			Gmelin, 1789			Y	Y
1973	Animalia	Chordata	Aves	Gruiformes	Rallidae	Porzana	carolina			Linnaeus, 1758			Y	Y
1974	Animalia	Chordata	Aves	Gruiformes	Rallidae	Rallus	limicola			Vieillot, 1819			Y	Y
1975	Animalia	Chordata	Aves	Passeriformes	Alaudidae	Eremophilia	alpestris			(Linnaeus, 1758)			Y	Y
1976	Animalia	Chordata	Aves	Passeriformes	Bombycillidae	Bombycilla	cedrorum			Vieillot, 1808			Y	Y	Y
1977	Animalia	Chordata	Aves	Passeriformes	Calcariidae	Calcarius	lapponicus			Linnaeus, 1758			Y	Y
1978	Animalia	Chordata	Aves	Passeriformes	Cardinalidae	Cardinalis	cardinalis			Linnaeus, 1758			Y	Y	Y
1979	Animalia	Chordata	Aves	Passeriformes	Cardinalidae	Passerina	cyanea			Linnaeus, 1766			Y	Y	Y
1980	Animalia	Chordata	Aves	Passeriformes	Cardinalidae	Pheucticus	ludovicianus			Linnaeus, 1766			Y	Y	Y
1981	Animalia	Chordata	Aves	Passeriformes	Cardinalidae	Plectrophenax	nivalis			Linnaeus, 1758			Y	Y
1982	Animalia	Chordata	Aves	Passeriformes	Certhiidae	Certhia	americana			Bonaparte, 1838			Y	Y
1983	Animalia	Chordata	Aves	Passeriformes	Corvidae	Corvus	brachyrhynchos			C. L. Brehm, 1822			Y	Y	Y
1984	Animalia	Chordata	Aves	Passeriformes	Corvidae	Corvus	corax			Linnaeus, 1758			Y	Y	Y
1985	Animalia	Chordata	Aves	Passeriformes	Corvidae	Cyanocitta	cristata			Linnaeus, 1758			Y	Y	Y
1986	Animalia	Chordata	Aves	Passeriformes	Emberizidae	Ammodramus	leconteii			Audubon, 1844			Y	Y
1987	Animalia	Chordata	Aves	Passeriformes	Emberizidae	Ammodramus	nelsoni			Allen, 1875			Y	Y
1988	Animalia	Chordata	Aves	Passeriformes	Emberizidae	Ammodramus	savannarum			Gmelin, 1789			Y	Y	Y
1989	Animalia	Chordata	Aves	Passeriformes	Emberizidae	Junco	hyemalis			Linnaeus, 1758			Y	Y
1990	Animalia	Chordata	Aves	Passeriformes	Emberizidae	Melospiza	georgiana			Latham, 1790			Y	Y
1991	Animalia	Chordata	Aves	Passeriformes	Emberizidae	Melospiza	lincolnii			Audubon, 1834			Y	Y
1992	Animalia	Chordata	Aves	Passeriformes	Emberizidae	Melospiza	melodia			A. Wilson, 1810			Y	Y	Y
1993	Animalia	Chordata	Aves	Passeriformes	Emberizidae	Passerculus	sandwichensis			Gmelin, 1789			Y	Y	Y
1994	Animalia	Chordata	Aves	Passeriformes	Emberizidae	Passerella	iliaca			Merrem, 1786			Y	Y
1995	Animalia	Chordata	Aves	Passeriformes	Emberizidae	Pipilo	erythrophthalmus			Linnaeus, 1758			Y	Y
1996	Animalia	Chordata	Aves	Passeriformes	Emberizidae	Pipilo	maculatus			Swainson, 1827			Y	Y
1997	Animalia	Chordata	Aves	Passeriformes	Emberizidae	Pooecetes	gramineus			Gmelin, 1789			Y	Y	Y
1998	Animalia	Chordata	Aves	Passeriformes	Emberizidae	Spizella	arborea			A. Wilson, 1810			Y	Y
1999	Animalia	Chordata	Aves	Passeriformes	Emberizidae	Spizella	pallida			Swainson, 1832			Y	Y	Y
[truncated: 1,349 more rows]
