# Supplementary material for: Biodiversity inventories in high gear: DNA barcoding facilitates a rapid biotic survey of a temperate nature reserve
Source: Biodivers Data J. 2015 Aug 30;(3):e6313. doi: 10.3897/BDJ.3.e6313 (PMC4568406; doi:10.3897/BDJ.3.e6313)
Supplement: Supplementary material 11 — Raw data for accumulation curve [file biodiversity_data_journal-3-e6313-s011.xlsx]

## Sheet: Generating Format for EstS
Field ID	FieldID_Code	BIN	BIN_Code	Count of Process Id					Field ID	FieldID_Code		BIN	BIN_Code
GMP#07724	1	BOLD:AAA3453	1	2					GMP#07724	1		BOLD:AAA3453	1
GMP#07724	1	BOLD:AAA4121	2	1					GMP#07725	2		BOLD:AAA4121	2
GMP#07724	1	BOLD:AAA4128	3	1					GMP#07726	3		BOLD:AAA4128	3
GMP#07724	1	BOLD:AAA5299	4	1					GMP#07727	4		BOLD:AAA5299	4
GMP#07724	1	BOLD:AAA7249	5	15					GMP#07728	5		BOLD:AAA7249	5
GMP#07724	1	BOLD:AAA7667	6	5					GMP#07730	6		BOLD:AAA7667	6
GMP#07724	1	BOLD:AAA8660	7	1					GMP#07732	7		BOLD:AAA8660	7
GMP#07724	1	BOLD:AAB0863	8	1					GMP#07744	8		BOLD:AAB0863	8
GMP#07724	1	BOLD:AAB2644	9	25					GMP#07745	9		BOLD:AAB2644	9
GMP#07724	1	BOLD:AAB2754	10	1					GMP#07746	10		BOLD:AAB2754	10
GMP#07724	1	BOLD:AAB4657	11	1					GMP#07747	11		BOLD:AAB4657	11
GMP#07724	1	BOLD:AAB4998	12	1					GMP#07748	12		BOLD:AAB4998	12
GMP#07724	1	BOLD:AAB7507	13	1					GMP#07750	13		BOLD:AAB7507	13
GMP#07724	1	BOLD:AAB8817	14	7					L#15RARE-0001	14		BOLD:AAB8817	14
GMP#07724	1	BOLD:AAB9140	15	1					L#15RARE-0002	15		BOLD:AAB9140	15
GMP#07724	1	BOLD:AAC0205	16	1					L#15RARE-0003	16		BOLD:AAC0205	16
GMP#07724	1	BOLD:AAC1302	17	1					L#15RARE-0004	17		BOLD:AAC1302	17
GMP#07724	1	BOLD:AAC5044	18	1					L#15RARE-0005	18		BOLD:AAC5044	18
GMP#07724	1	BOLD:AAC7941	19	1					L#15RARE-0006	19		BOLD:AAC7941	19
GMP#07724	1	BOLD:AAD5253	20	1					L#15RARE-0007	20		BOLD:AAD5253	20
GMP#07724	1	BOLD:AAE4298	21	2					L#15RARE-0008	21		BOLD:AAE4298	21
GMP#07724	1	BOLD:AAG0991	22	12					L#15RARE-0009	22		BOLD:AAG0991	22
GMP#07724	1	BOLD:AAG1742	23	1					L#15RARE-0010	23		BOLD:AAG1742	23
GMP#07724	1	BOLD:AAG2000	24	3					L#15RARE-0011	24		BOLD:AAG2000	24
GMP#07724	1	BOLD:AAG3266	25	7					L#15RARE-0012	25		BOLD:AAG3266	25
GMP#07724	1	BOLD:AAG3274	26	27					L#15RARE-0013	26		BOLD:AAG3274	26
GMP#07724	1	BOLD:AAG4893	27	3					L#15RARE-0014	27		BOLD:AAG4893	27
GMP#07724	1	BOLD:AAG6745	28	25					L#15RARE-0015	28		BOLD:AAG6745	28
GMP#07724	1	BOLD:AAG6757	29	3					L#15RARE-0016	29		BOLD:AAG6757	29
GMP#07724	1	BOLD:AAG7070	30	1					L#15RARE-0017	30		BOLD:AAG7070	30
GMP#07724	1	BOLD:AAG7283	31	2					L#15RARE-0018	31		BOLD:AAG7283	31
GMP#07724	1	BOLD:AAG7773	32	1					L#15RARE-0019	32		BOLD:AAG7773	32
GMP#07724	1	BOLD:AAG7774	33	3					L#15RARE-0020	33		BOLD:AAG7774	33
GMP#07724	1	BOLD:AAG8258	34	1					L#15RARE-0101	34		BOLD:AAG8258	34
GMP#07724	1	BOLD:AAH0022	35	1					L#15RARE-0102	35		BOLD:AAH0022	35
GMP#07724	1	BOLD:AAH3035	36	1					L#15RARE-0103	36		BOLD:AAH3035	36
GMP#07724	1	BOLD:AAI1981	37	10					L#15RARE-0104	37		BOLD:AAI1981	37
GMP#07724	1	BOLD:AAI2681	38	1					L#15RARE-0105	38		BOLD:AAI2681	38
GMP#07724	1	BOLD:AAI2766	39	1					L#15RARE-0106	39		BOLD:AAI2766	39
GMP#07724	1	BOLD:AAI3361	40	1					L#15RARE-0107	40		BOLD:AAI3361	40
GMP#07724	1	BOLD:AAI4303	41	2					L#15RARE-0108	41		BOLD:AAI4303	41
GMP#07724	1	BOLD:AAI8935	42	2					L#15RARE-0109	42		BOLD:AAI8935	42
GMP#07724	1	BOLD:AAJ4295	43	4					L#15RARE-0110	43		BOLD:AAJ4295	43
GMP#07724	1	BOLD:AAL7382	44	1					L#15RARE-0111	44		BOLD:AAL7382	44
GMP#07724	1	BOLD:AAM6191	45	1					L#15RARE-0112	45		BOLD:AAM6191	45
GMP#07724	1	BOLD:AAM6288	46	1					L#15RARE-0114	46		BOLD:AAM6288	46
GMP#07724	1	BOLD:AAM9107	47	1					L#15RARE-0115	47		BOLD:AAM9107	47
GMP#07724	1	BOLD:AAM9347	48	1					L#15RARE-0116	48		BOLD:AAM9347	48
GMP#07724	1	BOLD:AAN5355	49	1					L#15RARE-0117	49		BOLD:AAN5355	49
GMP#07724	1	BOLD:AAN5358	50	1					L#15RARE-0118	50		BOLD:AAN5358	50
GMP#07724	1	BOLD:AAN6154	51	4					L#15RARE-0121	51		BOLD:AAN6154	51
GMP#07724	1	BOLD:AAN8679	52	7					L#15RARE-0122	52		BOLD:AAN8679	52
GMP#07724	1	BOLD:AAP2967	53	4					L#15RARE-0123	53		BOLD:AAP2967	53
GMP#07724	1	BOLD:AAP3767	54	1					L#15RARE-0124	54		BOLD:AAP3767	54
GMP#07724	1	BOLD:AAP6873	55	11					L#15RARE-0134	55		BOLD:AAP6873	55
GMP#07724	1	BOLD:AAP8585	56	7					L#15RARE-0135	56		BOLD:AAP8585	56
GMP#07724	1	BOLD:AAQ0602	57	8					L#15RARE-0137	57		BOLD:AAQ0602	57
GMP#07724	1	BOLD:AAU6624	58	1					L#15RARE-0138	58		BOLD:AAU6624	58
GMP#07724	1	BOLD:AAU6970	59	1					L#15RARE-0141	59		BOLD:AAU6970	59
GMP#07724	1	BOLD:AAU8448	60	2					L#15RARE-0142	60		BOLD:AAU8448	60
GMP#07724	1	BOLD:AAU8457	61	1					L#15RARE-0143	61		BOLD:AAU8457	61
GMP#07724	1	BOLD:AAV0437	62	6					L#15RARE-0144	62		BOLD:AAV0437	62
GMP#07724	1	BOLD:ABA1222	63	2					L#15RARE-0145	63		BOLD:ABA1222	63
GMP#07724	1	BOLD:ABA1223	64	1					L#15RARE-0149	64		BOLD:ABA1223	64
GMP#07724	1	BOLD:ABA1225	65	4					L#15RARE-0150	65		BOLD:ABA1225	65
GMP#07724	1	BOLD:ABA1245	66	1					L#15RARE-0152	66		BOLD:ABA1245	66
GMP#07724	1	BOLD:ABA6335	67	2					L#15RARE-0153	67		BOLD:ABA6335	67
GMP#07724	1	BOLD:ABA6465	68	1					L#15RARE-0154	68		BOLD:ABA6465	68
GMP#07724	1	BOLD:ABU5525	69	6					L#15RARE-0156	69		BOLD:ABU5525	69
GMP#07724	1	BOLD:ABU5526	70	3					L#15RARE-0159	70		BOLD:ABU5526	70
GMP#07724	1	BOLD:ABU5546	71	1					L#15RARE-0161	71		BOLD:ABU5546	71
GMP#07724	1	BOLD:ABV3853	72	1					L#15RARE-0164	72		BOLD:ABV3853	72
GMP#07724	1	BOLD:ABW1310	73	1					L#15RARE-0165	73		BOLD:ABW1310	73
GMP#07724	1	BOLD:ABW7619	74	2					L#15RARE-0166	74		BOLD:ABW7619	74
GMP#07724	1	BOLD:ABY7153	75	2					L#15RARE-0167	75		BOLD:ABY7153	75
GMP#07724	1	BOLD:ABZ2527	76	1					L#15RARE-0168	76		BOLD:ABZ2527	76
GMP#07724	1	BOLD:ACA2939	77	1					L#15RARE-0169	77		BOLD:ACA2939	77
GMP#07724	1	BOLD:ACA4749	78	1					L#15RARE-0170	78		BOLD:ACA4749	78
GMP#07724	1	BOLD:ACA9275	79	1					L#15RARE-0171	79		BOLD:ACA9275	79
GMP#07724	1	BOLD:ACC0651	80	89					L#15RARE-0172	80		BOLD:ACC0651	80
GMP#07724	1	BOLD:ACD0959	81	1					L#15RARE-0174	81		BOLD:ACD0959	81
GMP#07724	1	BOLD:ACE1572	82	1					L#15RARE-0175	82		BOLD:ACE1572	82
GMP#07724	1	BOLD:ACF6271	83	2					L#15RARE-0176	83		BOLD:ACF6271	83
GMP#07724	1	BOLD:ACF7745	84	1					L#15RARE-0177	84		BOLD:ACF7745	84
GMP#07724	1	BOLD:ACF8117	85	1					L#15RARE-0178	85		BOLD:ACF8117	85
GMP#07724	1	BOLD:ACF8174	86	1					L#15RARE-0179	86		BOLD:ACF8174	86
GMP#07724	1	BOLD:ACF9311	87	1					L#15RARE-0180	87		BOLD:ACF9311	87
GMP#07724	1	BOLD:ACF9627	88	3					L#15RARE-0181	88		BOLD:ACF9627	88
GMP#07724	1	BOLD:ACL6239	89	5					L#15RARE-0182	89		BOLD:ACL6239	89
GMP#07724	1	BOLD:ACM2009	90	2					L#15RARE-0183	90		BOLD:ACM2009	90
GMP#07724	1	BOLD:ACP4736	91	3					L#15RARE-0187	91		BOLD:ACP4736	91
GMP#07724	1	BOLD:ACQ9076	92	1					L#15RARE-0189	92		BOLD:ACQ9076	92
GMP#07724	1	BOLD:ACR7948	93	1					L#15RARE-0190	93		BOLD:ACR7948	93
GMP#07725	2	BOLD:AAA2372	94	1					L#15RARE-0192	94		BOLD:AAA2372	94
GMP#07725	2	BOLD:AAA3453	1	5					L#15RARE-0193	95		BOLD:AAA3893	95
GMP#07725	2	BOLD:AAA3893	95	1					L#15RARE-0194	96		BOLD:AAA7374	96
GMP#07725	2	BOLD:AAA4121	2	1					L#15RARE-0195	97		BOLD:AAA7550	97
GMP#07725	2	BOLD:AAA7249	5	13					L#15RARE-0200	98		BOLD:AAA9049	98
GMP#07725	2	BOLD:AAA7374	96	1					L#15RARE-0202	99		BOLD:AAA9461	99
GMP#07725	2	BOLD:AAA7550	97	10					L#15RARE-0204	100		BOLD:AAB2384	100
GMP#07725	2	BOLD:AAA7667	6	4					L#15RARE-0206	101		BOLD:AAB2641	101
GMP#07725	2	BOLD:AAA8660	7	1					L#15RARE-0207	102		BOLD:AAB3383	102
GMP#07725	2	BOLD:AAA9049	98	1					L#15RARE-0211	103		BOLD:AAC1487	103
GMP#07725	2	BOLD:AAA9461	99	1					L#15RARE-0212	104		BOLD:AAC4197	104
GMP#07725	2	BOLD:AAB2384	100	4					L#15RARE-0213	105		BOLD:AAC6982	105
GMP#07725	2	BOLD:AAB2641	101	1					L#15RARE-0214	106		BOLD:AAC8595	106
GMP#07725	2	BOLD:AAB2644	9	2					L#15RARE-0216	107		BOLD:AAD0158	107
GMP#07725	2	BOLD:AAB2754	10	1					L#15RARE-0218	108		BOLD:AAD0300	108
GMP#07725	2	BOLD:AAB3383	102	1					L#15RARE-0219	109		BOLD:AAD4915	109
GMP#07725	2	BOLD:AAB4657	11	1					L#15RARE-0220	110		BOLD:AAD5417	110
GMP#07725	2	BOLD:AAB8817	14	3					L#15RARE-0221	111		BOLD:AAD7604	111
GMP#07725	2	BOLD:AAB9140	15	1					L#15RARE-0237	112		BOLD:AAD9052	112
GMP#07725	2	BOLD:AAC0205	16	3					L#15RARE-0238	113		BOLD:AAD9847	113
GMP#07725	2	BOLD:AAC1302	17	13					L#15RARE-0239	114		BOLD:AAE0707	114
GMP#07725	2	BOLD:AAC1487	103	1					L#15RARE-0240	115		BOLD:AAE3675	115
GMP#07725	2	BOLD:AAC4197	104	1					L#15RARE-0241	116		BOLD:AAE7347	116
GMP#07725	2	BOLD:AAC6982	105	1					L#15RARE-0242	117		BOLD:AAF6986	117
GMP#07725	2	BOLD:AAC8595	106	1					L#15RARE-0248	118		BOLD:AAF9311	118
GMP#07725	2	BOLD:AAD0158	107	1					L#15RARE-0249	119		BOLD:AAF9314	119
GMP#07725	2	BOLD:AAD0300	108	2					L#15RARE-0250	120		BOLD:AAG0314	120
GMP#07725	2	BOLD:AAD4915	109	1					L#15RARE-0253	121		BOLD:AAG0464	121
GMP#07725	2	BOLD:AAD5417	110	1					L#15RARE-0254	122		BOLD:AAG0892	122
GMP#07725	2	BOLD:AAD7604	111	1					L#15RARE-0255	123		BOLD:AAG0906	123
GMP#07725	2	BOLD:AAD9052	112	2					L#15RARE-0258	124		BOLD:AAG1021	124
GMP#07725	2	BOLD:AAD9847	113	1					L#15RARE-0259	125		BOLD:AAG1144	125
GMP#07725	2	BOLD:AAE0707	114	1					L#15RARE-0260	126		BOLD:AAG1350	126
GMP#07725	2	BOLD:AAE3675	115	1					L#15RARE-0261	127		BOLD:AAG1998	127
GMP#07725	2	BOLD:AAE4298	21	2					L#15RARE-0262	128		BOLD:AAG2128	128
GMP#07725	2	BOLD:AAE7347	116	1					L#15RARE-0268	129		BOLD:AAG2463	129
GMP#07725	2	BOLD:AAF6986	117	1					L#15RARE-0275	130		BOLD:AAG2479	130
GMP#07725	2	BOLD:AAF9311	118	1					L#15RARE-0278	131		BOLD:AAG2812	131
GMP#07725	2	BOLD:AAF9314	119	1					L#15RARE-0279	132		BOLD:AAG3248	132
GMP#07725	2	BOLD:AAG0314	120	1					L#15RARE-0280	133		BOLD:AAG3340	133
GMP#07725	2	BOLD:AAG0464	121	1					L#15RARE-0281	134		BOLD:AAG3633	134
GMP#07725	2	BOLD:AAG0892	122	1					L#15RARE-0282	135		BOLD:AAG4782	135
GMP#07725	2	BOLD:AAG0906	123	1					L#15RARE-0283	136		BOLD:AAG4972	136
GMP#07725	2	BOLD:AAG0991	22	2					L#15RARE-0284	137		BOLD:AAG5455	137
GMP#07725	2	BOLD:AAG1021	124	1					L#15RARE-0285	138		BOLD:AAG5457	138
GMP#07725	2	BOLD:AAG1144	125	1					L#15RARE-0286	139		BOLD:AAG5467	139
GMP#07725	2	BOLD:AAG1350	126	1					L#15RARE-0288	140		BOLD:AAG5471	140
GMP#07725	2	BOLD:AAG1742	23	8					L#15RARE-0289	141		BOLD:AAG7737	141
GMP#07725	2	BOLD:AAG1998	127	2					L#15RARE-0291	142		BOLD:AAG7745	142
GMP#07725	2	BOLD:AAG2000	24	3					L#15RARE-0292	143		BOLD:AAH0256	143
GMP#07725	2	BOLD:AAG2128	128	1					L#15RARE-0293	144		BOLD:AAH1886	144
GMP#07725	2	BOLD:AAG2463	129	1					L#15RARE-0294	145		BOLD:AAH3037	145
GMP#07725	2	BOLD:AAG2479	130	2					L#15RARE-0295	146		BOLD:AAH3904	146
GMP#07725	2	BOLD:AAG2812	131	20					L#15RARE-0296	147		BOLD:AAH3920	147
GMP#07725	2	BOLD:AAG3248	132	1					L#15RARE-0297	148		BOLD:AAH4208	148
GMP#07725	2	BOLD:AAG3266	25	3					L#15RARE-0298	149		BOLD:AAH9641	149
GMP#07725	2	BOLD:AAG3274	26	42					L#15RARE-0302	150		BOLD:AAI2683	150
GMP#07725	2	BOLD:AAG3340	133	5					L#15RARE-0303	151		BOLD:AAI2765	151
GMP#07725	2	BOLD:AAG3633	134	1					L#15RARE-0304	152		BOLD:AAI3014	152
GMP#07725	2	BOLD:AAG4782	135	1					L#15RARE-0305	153		BOLD:AAJ9649	153
GMP#07725	2	BOLD:AAG4893	27	6					L#15RARE-0306	154		BOLD:AAK2038	154
GMP#07725	2	BOLD:AAG4972	136	2					L#15RARE-0308	155		BOLD:AAK7452	155
GMP#07725	2	BOLD:AAG5455	137	1					L#15RBB-001A	156		BOLD:AAL4861	156
GMP#07725	2	BOLD:AAG5457	138	1					L#15RBB-001T	157		BOLD:AAL5267	157
GMP#07725	2	BOLD:AAG5467	139	1					L#15RBB-002T	158		BOLD:AAL8123	158
GMP#07725	2	BOLD:AAG5471	140	1					L#15RBB-003T	159		BOLD:AAL9076	159
GMP#07725	2	BOLD:AAG6745	28	27					L#15RBB-004T	160		BOLD:AAM6281	160
GMP#07725	2	BOLD:AAG6757	29	7					L#15RBB-005T	161		BOLD:AAM6293	161
GMP#07725	2	BOLD:AAG7070	30	1					L#15RBB-006A	162		BOLD:AAM7064	162
GMP#07725	2	BOLD:AAG7737	141	5					L#15RBB-007	163		BOLD:AAM7487	163
GMP#07725	2	BOLD:AAG7745	142	2								BOLD:AAM9117	164
GMP#07725	2	BOLD:AAG7773	32	1								BOLD:AAM9242	165
GMP#07725	2	BOLD:AAH0022	35	2								BOLD:AAN5268	166
GMP#07725	2	BOLD:AAH0256	143	3								BOLD:AAN5326	167
GMP#07725	2	BOLD:AAH1886	144	1								BOLD:AAN5330	168
GMP#07725	2	BOLD:AAH3035	36	1								BOLD:AAN5339	169
GMP#07725	2	BOLD:AAH3037	145	1								BOLD:AAN5348	170
GMP#07725	2	BOLD:AAH3904	146	3								BOLD:AAN6394	171
GMP#07725	2	BOLD:AAH3920	147	2								BOLD:AAN6407	172
GMP#07725	2	BOLD:AAH4208	148	1								BOLD:AAN8412	173
GMP#07725	2	BOLD:AAH9641	149	1								BOLD:AAN8770	174
GMP#07725	2	BOLD:AAI1981	37	4								BOLD:AAN9511	175
GMP#07725	2	BOLD:AAI2681	38	5								BOLD:AAN9916	176
GMP#07725	2	BOLD:AAI2683	150	1								BOLD:AAO8361	177
GMP#07725	2	BOLD:AAI2765	151	1								BOLD:AAP2527	178
GMP#07725	2	BOLD:AAI2766	39	5								BOLD:AAP2721	179
GMP#07725	2	BOLD:AAI3014	152	3								BOLD:AAP2825	180
GMP#07725	2	BOLD:AAI4303	41	1								BOLD:AAP2907	181
GMP#07725	2	BOLD:AAI8935	42	20								BOLD:AAP3780	182
GMP#07725	2	BOLD:AAJ4295	43	3								BOLD:AAP4734	183
GMP#07725	2	BOLD:AAJ9649	153	1								BOLD:AAP5343	184
GMP#07725	2	BOLD:AAK2038	154	1								BOLD:AAP5920	185
GMP#07725	2	BOLD:AAK7452	155	1								BOLD:AAP5921	186
GMP#07725	2	BOLD:AAL4861	156	1								BOLD:AAP6875	187
GMP#07725	2	BOLD:AAL5267	157	3								BOLD:AAP7026	188
GMP#07725	2	BOLD:AAL8123	158	1								BOLD:AAP8158	189
GMP#07725	2	BOLD:AAL9076	159	2								BOLD:AAP8654	190
GMP#07725	2	BOLD:AAM6281	160	1								BOLD:AAP8757	191
GMP#07725	2	BOLD:AAM6288	46	3								BOLD:AAU0577	192
GMP#07725	2	BOLD:AAM6293	161	1								BOLD:AAU6524	193
GMP#07725	2	BOLD:AAM7064	162	2								BOLD:AAU6612	194
GMP#07725	2	BOLD:AAM7487	163	2								BOLD:AAU6764	195
GMP#07725	2	BOLD:AAM9107	47	6								BOLD:AAU7331	196
GMP#07725	2	BOLD:AAM9117	164	1								BOLD:AAU8347	197
GMP#07725	2	BOLD:AAM9242	165	1								BOLD:AAU8358	198
GMP#07725	2	BOLD:AAM9347	48	3								BOLD:AAU8377	199
GMP#07725	2	BOLD:AAN5268	166	1								BOLD:AAU8399	200
GMP#07725	2	BOLD:AAN5326	167	1								BOLD:AAU8693	201
GMP#07725	2	BOLD:AAN5330	168	4								BOLD:AAU9270	202
GMP#07725	2	BOLD:AAN5339	169	1								BOLD:AAV0157	203
GMP#07725	2	BOLD:AAN5348	170	3								BOLD:AAV0161	204
GMP#07725	2	BOLD:AAN5355	49	5								BOLD:AAV0165	205
GMP#07725	2	BOLD:AAN5358	50	4								BOLD:AAV1295	206
GMP#07725	2	BOLD:AAN6154	51	28								BOLD:AAY6412	207
GMP#07725	2	BOLD:AAN6394	171	1								BOLD:AAY6533	208
GMP#07725	2	BOLD:AAN6407	172	1								BOLD:AAY6738	209
GMP#07725	2	BOLD:AAN8412	173	5								BOLD:AAY6747	210
GMP#07725	2	BOLD:AAN8679	52	12								BOLD:AAY6751	211
GMP#07725	2	BOLD:AAN8770	174	4								BOLD:AAY6799	212
GMP#07725	2	BOLD:AAN9511	175	1								BOLD:AAZ5835	213
GMP#07725	2	BOLD:AAN9916	176	1								BOLD:AAZ8495	214
GMP#07725	2	BOLD:AAO8361	177	17								BOLD:AAZ8496	215
GMP#07725	2	BOLD:AAP2527	178	1								BOLD:ABA1214	216
GMP#07725	2	BOLD:AAP2721	179	1								BOLD:ABA1215	217
GMP#07725	2	BOLD:AAP2825	180	2								BOLD:ABA1217	218
GMP#07725	2	BOLD:AAP2907	181	1								BOLD:ABA1219	219
GMP#07725	2	BOLD:AAP2967	53	19								BOLD:ABA1220	220
GMP#07725	2	BOLD:AAP3767	54	1								BOLD:ABA1231	221
GMP#07725	2	BOLD:AAP3780	182	4								BOLD:ABA3960	222
GMP#07725	2	BOLD:AAP4734	183	2								BOLD:ABA5771	223
GMP#07725	2	BOLD:AAP5343	184	3								BOLD:ABA5772	224
GMP#07725	2	BOLD:AAP5920	185	12								BOLD:ABA5786	225
GMP#07725	2	BOLD:AAP5921	186	1								BOLD:ABA5798	226
GMP#07725	2	BOLD:AAP6873	55	5								BOLD:ABA5810	227
GMP#07725	2	BOLD:AAP6875	187	1								BOLD:ABA5830	228
GMP#07725	2	BOLD:AAP7026	188	1								BOLD:ABA5864	229
GMP#07725	2	BOLD:AAP8158	189	1								BOLD:ABA5903	230
GMP#07725	2	BOLD:AAP8585	56	9								BOLD:ABA9071	231
GMP#07725	2	BOLD:AAP8654	190	1								BOLD:ABU5520	232
GMP#07725	2	BOLD:AAP8757	191	2								BOLD:ABU5528	233
GMP#07725	2	BOLD:AAQ0602	57	2								BOLD:ABU9891	234
GMP#07725	2	BOLD:AAU0577	192	1								BOLD:ABV1241	235
GMP#07725	2	BOLD:AAU6524	193	1								BOLD:ABV1277	236
GMP#07725	2	BOLD:AAU6612	194	9								BOLD:ABV1314	237
GMP#07725	2	BOLD:AAU6624	58	2								BOLD:ABV9017	238
GMP#07725	2	BOLD:AAU6764	195	1								BOLD:ABV9306	239
GMP#07725	2	BOLD:AAU6970	59	5								BOLD:ABW1307	240
GMP#07725	2	BOLD:AAU7331	196	1								BOLD:ABW5076	241
GMP#07725	2	BOLD:AAU8347	197	2								BOLD:ABW5502	242
GMP#07725	2	BOLD:AAU8358	198	1								BOLD:ABW5634	243
GMP#07725	2	BOLD:AAU8377	199	2								BOLD:ABW7654	244
GMP#07725	2	BOLD:AAU8399	200	2								BOLD:ABX0273	245
GMP#07725	2	BOLD:AAU8457	61	2								BOLD:ABX5713	246
GMP#07725	2	BOLD:AAU8693	201	2								BOLD:ABX7281	247
GMP#07725	2	BOLD:AAU9270	202	2								BOLD:ABX9019	248
GMP#07725	2	BOLD:AAV0157	203	4								BOLD:ABY8347	249
GMP#07725	2	BOLD:AAV0161	204	1								BOLD:ABY9043	250
GMP#07725	2	BOLD:AAV0165	205	1								BOLD:ABY9141	251
GMP#07725	2	BOLD:AAV0437	62	5								BOLD:ABZ1306	252
GMP#07725	2	BOLD:AAV1295	206	1								BOLD:ABZ1424	253
GMP#07725	2	BOLD:AAY6412	207	1								BOLD:ABZ2493	254
GMP#07725	2	BOLD:AAY6533	208	1								BOLD:ACA2964	255
GMP#07725	2	BOLD:AAY6738	209	35								BOLD:ACB0797	256
GMP#07725	2	BOLD:AAY6747	210	1								BOLD:ACB9781	257
GMP#07725	2	BOLD:AAY6751	211	7								BOLD:ACC1156	258
GMP#07725	2	BOLD:AAY6799	212	2								BOLD:ACC5439	259
GMP#07725	2	BOLD:AAZ5835	213	1								BOLD:ACC5578	260
GMP#07725	2	BOLD:AAZ8495	214	3								BOLD:ACC5761	261
GMP#07725	2	BOLD:AAZ8496	215	3								BOLD:ACC7846	262
GMP#07725	2	BOLD:ABA1214	216	1								BOLD:ACC9435	263
GMP#07725	2	BOLD:ABA1215	217	1								BOLD:ACD0202	264
GMP#07725	2	BOLD:ABA1217	218	26								BOLD:ACD2208	265
GMP#07725	2	BOLD:ABA1219	219	42								BOLD:ACD3877	266
GMP#07725	2	BOLD:ABA1220	220	2								BOLD:ACD8833	267
GMP#07725	2	BOLD:ABA1222	63	55								BOLD:ACE0660	268
GMP#07725	2	BOLD:ABA1223	64	5								BOLD:ACE2864	269
GMP#07725	2	BOLD:ABA1225	65	2								BOLD:ACE5102	270
GMP#07725	2	BOLD:ABA1231	221	1								BOLD:ACF2217	271
GMP#07725	2	BOLD:ABA3960	222	6								BOLD:ACF2457	272
GMP#07725	2	BOLD:ABA5771	223	2								BOLD:ACF2821	273
GMP#07725	2	BOLD:ABA5772	224	14								BOLD:ACF6510	274
GMP#07725	2	BOLD:ABA5786	225	3								BOLD:ACF7092	275
GMP#07725	2	BOLD:ABA5798	226	3								BOLD:ACF7275	276
GMP#07725	2	BOLD:ABA5810	227	1								BOLD:ACF8096	277
GMP#07725	2	BOLD:ABA5830	228	5								BOLD:ACF8460	278
GMP#07725	2	BOLD:ABA5864	229	4								BOLD:ACF8472	279
GMP#07725	2	BOLD:ABA5903	230	1								BOLD:ACF8829	280
GMP#07725	2	BOLD:ABA6335	67	6								BOLD:ACF9074	281
GMP#07725	2	BOLD:ABA9071	231	1								BOLD:ACF9268	282
GMP#07725	2	BOLD:ABU5520	232	1								BOLD:ACG2963	283
GMP#07725	2	BOLD:ABU5525	69	7								BOLD:ACG9235	284
GMP#07725	2	BOLD:ABU5526	70	94								BOLD:ACI5517	285
GMP#07725	2	BOLD:ABU5528	233	9								BOLD:ACI9637	286
GMP#07725	2	BOLD:ABU5546	71	4								BOLD:ACJ0239	287
GMP#07725	2	BOLD:ABU9891	234	6								BOLD:ACJ1417	288
GMP#07725	2	BOLD:ABV1241	235	1								BOLD:ACK1603	289
GMP#07725	2	BOLD:ABV1277	236	1								BOLD:ACK1847	290
GMP#07725	2	BOLD:ABV1314	237	2								BOLD:ACK2612	291
GMP#07725	2	BOLD:ABV9017	238	1								BOLD:ACK3871	292
GMP#07725	2	BOLD:ABV9306	239	1								BOLD:ACK8285	293
GMP#07725	2	BOLD:ABW1307	240	1								BOLD:ACL0109	294
GMP#07725	2	BOLD:ABW1310	73	18								BOLD:ACL3048	295
GMP#07725	2	BOLD:ABW5076	241	1								BOLD:ACL3059	296
GMP#07725	2	BOLD:ABW5502	242	1								BOLD:ACM1766	297
GMP#07725	2	BOLD:ABW5634	243	3								BOLD:ACM2034	298
GMP#07725	2	BOLD:ABW7654	244	8								BOLD:ACM2497	299
GMP#07725	2	BOLD:ABX0273	245	2								BOLD:ACM3454	300
GMP#07725	2	BOLD:ABX5713	246	3								BOLD:ACM6785	301
GMP#07725	2	BOLD:ABX7281	247	1								BOLD:ACM9794	302
GMP#07725	2	BOLD:ABX9019	248	4								BOLD:ACO0513	303
GMP#07725	2	BOLD:ABY8347	249	1								BOLD:ACQ3943	304
GMP#07725	2	BOLD:ABY9043	250	1								BOLD:ACQ8506	305
GMP#07725	2	BOLD:ABY9141	251	3								BOLD:ACR4826	306
GMP#07725	2	BOLD:ABZ1306	252	1								BOLD:ACU0247	307
GMP#07725	2	BOLD:ABZ1424	253	10								BOLD:ACU6504	308
GMP#07725	2	BOLD:ABZ2493	254	5								BOLD:ACU7906	309
GMP#07725	2	BOLD:ACA2964	255	4								BOLD:ACV2258	310
GMP#07725	2	BOLD:ACA9275	79	1								BOLD:ACV2335	311
GMP#07725	2	BOLD:ACB0797	256	2								BOLD:ACV2632	312
GMP#07725	2	BOLD:ACB9781	257	2								BOLD:ACV2885	313
GMP#07725	2	BOLD:ACC0651	80	84								BOLD:ACV2886	314
GMP#07725	2	BOLD:ACC1156	258	1								BOLD:ACV2925	315
GMP#07725	2	BOLD:ACC5439	259	1								BOLD:ACV3368	316
GMP#07725	2	BOLD:ACC5578	260	1								BOLD:ACV5777	317
GMP#07725	2	BOLD:ACC5761	261	1								BOLD:AAA2052	318
GMP#07725	2	BOLD:ACC7846	262	1								BOLD:AAA2368	319
GMP#07725	2	BOLD:ACC9435	263	1								BOLD:AAA2408	320
GMP#07725	2	BOLD:ACD0202	264	2								BOLD:AAA3984	321
GMP#07725	2	BOLD:ACD2208	265	6								BOLD:AAA4119	322
GMP#07725	2	BOLD:ACD3877	266	5								BOLD:AAA4570	323
GMP#07725	2	BOLD:ACD8833	267	1								BOLD:AAA7188	324
GMP#07725	2	BOLD:ACE0660	268	1								BOLD:AAA7661	325
GMP#07725	2	BOLD:ACE2864	269	1								BOLD:AAA7886	326
GMP#07725	2	BOLD:ACE5102	270	3								BOLD:AAB1098	327
GMP#07725	2	BOLD:ACF2217	271	1								BOLD:AAB2218	328
GMP#07725	2	BOLD:ACF2457	272	1								BOLD:AAB2866	329
GMP#07725	2	BOLD:ACF2821	273	34								BOLD:AAB4931	330
GMP#07725	2	BOLD:ACF6510	274	1								BOLD:AAB7030	331
GMP#07725	2	BOLD:ACF7092	275	1								BOLD:AAB7105	332
GMP#07725	2	BOLD:ACF7275	276	2								BOLD:AAB7361	333
GMP#07725	2	BOLD:ACF7745	84	1								BOLD:AAB7514	334
GMP#07725	2	BOLD:ACF8096	277	1								BOLD:AAB7534	335
GMP#07725	2	BOLD:ACF8460	278	5								BOLD:AAB7749	336
GMP#07725	2	BOLD:ACF8472	279	1								BOLD:AAC0706	337
GMP#07725	2	BOLD:ACF8829	280	3								BOLD:AAC1312	338
GMP#07725	2	BOLD:ACF9074	281	6								BOLD:AAC2498	339
GMP#07725	2	BOLD:ACF9268	282	5								BOLD:AAC4525	340
GMP#07725	2	BOLD:ACG2963	283	1								BOLD:AAC8567	341
GMP#07725	2	BOLD:ACG9235	284	2								BOLD:AAC8842	342
GMP#07725	2	BOLD:ACI5517	285	2								BOLD:AAC9199	343
GMP#07725	2	BOLD:ACI9637	286	1								BOLD:AAD1395	344
GMP#07725	2	BOLD:ACJ0239	287	1								BOLD:AAD1564	345
GMP#07725	2	BOLD:ACJ1417	288	1								BOLD:AAD2085	346
GMP#07725	2	BOLD:ACK1603	289	1								BOLD:AAD2144	347
GMP#07725	2	BOLD:ACK1847	290	1								BOLD:AAD4355	348
GMP#07725	2	BOLD:ACK2612	291	1								BOLD:AAD4432	349
GMP#07725	2	BOLD:ACK3871	292	7								BOLD:AAD4764	350
GMP#07725	2	BOLD:ACK8285	293	1								BOLD:AAD5593	351
GMP#07725	2	BOLD:ACL0109	294	2								BOLD:AAD7145	352
GMP#07725	2	BOLD:ACL3048	295	7								BOLD:AAE0242	353
GMP#07725	2	BOLD:ACL3059	296	1								BOLD:AAE0948	354
GMP#07725	2	BOLD:ACL6239	89	12								BOLD:AAE3698	355
GMP#07725	2	BOLD:ACM1766	297	1								BOLD:AAE8603	356
GMP#07725	2	BOLD:ACM2009	90	5								BOLD:AAE9008	357
GMP#07725	2	BOLD:ACM2034	298	1								BOLD:AAF6259	358
GMP#07725	2	BOLD:ACM2497	299	1								BOLD:AAF7088	359
GMP#07725	2	BOLD:ACM3454	300	1								BOLD:AAF9316	360
GMP#07725	2	BOLD:ACM6785	301	1								BOLD:AAF9826	361
GMP#07725	2	BOLD:ACM9794	302	1								BOLD:AAG0920	362
GMP#07725	2	BOLD:ACO0513	303	1								BOLD:AAG0996	363
GMP#07725	2	BOLD:ACP4736	91	1								BOLD:AAG1000	364
GMP#07725	2	BOLD:ACQ3943	304	8								BOLD:AAG1002	365
GMP#07725	2	BOLD:ACQ8506	305	1								BOLD:AAG1769	366
GMP#07725	2	BOLD:ACR4826	306	1								BOLD:AAG2740	367
GMP#07725	2	BOLD:ACU0247	307	1								BOLD:AAG3259	368
GMP#07725	2	BOLD:ACU6504	308	3								BOLD:AAG3260	369
GMP#07725	2	BOLD:ACU7906	309	2								BOLD:AAG3323	370
GMP#07725	2	BOLD:ACV2258	310	1								BOLD:AAG4775	371
GMP#07725	2	BOLD:ACV2335	311	1								BOLD:AAG4871	372
GMP#07725	2	BOLD:ACV2632	312	1								BOLD:AAG4923	373
GMP#07725	2	BOLD:ACV2885	313	9								BOLD:AAG5423	374
GMP#07725	2	BOLD:ACV2886	314	1								BOLD:AAG5463	375
GMP#07725	2	BOLD:ACV2925	315	1								BOLD:AAG5464	376
GMP#07725	2	BOLD:ACV3368	316	3								BOLD:AAG5473	377
GMP#07725	2	BOLD:ACV5777	317	5								BOLD:AAG5523	378
GMP#07726	3	BOLD:AAA2052	318	9								BOLD:AAG5542	379
GMP#07726	3	BOLD:AAA2368	319	1								BOLD:AAG6452	380
GMP#07726	3	BOLD:AAA2372	94	1								BOLD:AAG6475	381
GMP#07726	3	BOLD:AAA2408	320	1								BOLD:AAG6743	382
GMP#07726	3	BOLD:AAA3453	1	2								BOLD:AAG6762	383
GMP#07726	3	BOLD:AAA3984	321	1								BOLD:AAG6766	384
GMP#07726	3	BOLD:AAA4119	322	1								BOLD:AAG7308	385
GMP#07726	3	BOLD:AAA4570	323	1								BOLD:AAG7898	386
GMP#07726	3	BOLD:AAA7188	324	1								BOLD:AAG7977	387
GMP#07726	3	BOLD:AAA7249	5	11								BOLD:AAG8493	388
GMP#07726	3	BOLD:AAA7550	97	1								BOLD:AAG8850	389
GMP#07726	3	BOLD:AAA7661	325	1								BOLD:AAG9055	390
GMP#07726	3	BOLD:AAA7667	6	3								BOLD:AAG9189	391
GMP#07726	3	BOLD:AAA7886	326	1								BOLD:AAG9713	392
GMP#07726	3	BOLD:AAA9461	99	2								BOLD:AAG9897	393
GMP#07726	3	BOLD:AAB1098	327	1								BOLD:AAH0108	394
GMP#07726	3	BOLD:AAB2218	328	1								BOLD:AAH0135	395
GMP#07726	3	BOLD:AAB2384	100	13								BOLD:AAH2376	396
GMP#07726	3	BOLD:AAB2644	9	14								BOLD:AAH2378	397
GMP#07726	3	BOLD:AAB2754	10	1								BOLD:AAH2876	398
GMP#07726	3	BOLD:AAB2866	329	1								BOLD:AAH3671	399
GMP#07726	3	BOLD:AAB4931	330	2								BOLD:AAH7068	400
GMP#07726	3	BOLD:AAB7030	331	1								BOLD:AAI2721	401
GMP#07726	3	BOLD:AAB7105	332	1								BOLD:AAI2838	402
GMP#07726	3	BOLD:AAB7361	333	2								BOLD:AAI3015	403
GMP#07726	3	BOLD:AAB7514	334	1								BOLD:AAI6861	404
GMP#07726	3	BOLD:AAB7534	335	2								BOLD:AAI7960	405
GMP#07726	3	BOLD:AAB7749	336	1								BOLD:AAJ3263	406
GMP#07726	3	BOLD:AAB8817	14	1								BOLD:AAK7440	407
GMP#07726	3	BOLD:AAB9140	15	1								BOLD:AAL4176	408
GMP#07726	3	BOLD:AAC0706	337	2								BOLD:AAL6962	409
GMP#07726	3	BOLD:AAC1302	17	2								BOLD:AAL7329	410
GMP#07726	3	BOLD:AAC1312	338	8								BOLD:AAL7525	411
GMP#07726	3	BOLD:AAC1487	103	1								BOLD:AAL9075	412
GMP#07726	3	BOLD:AAC2498	339	1								BOLD:AAL9079	413
GMP#07726	3	BOLD:AAC4197	104	30								BOLD:AAM6230	414
GMP#07726	3	BOLD:AAC4525	340	24								BOLD:AAM6277	415
GMP#07726	3	BOLD:AAC8567	341	5								BOLD:AAM6286	416
GMP#07726	3	BOLD:AAC8595	106	1								BOLD:AAM6289	417
GMP#07726	3	BOLD:AAC8842	342	1								BOLD:AAM6295	418
GMP#07726	3	BOLD:AAC9199	343	2								BOLD:AAM7333	419
GMP#07726	3	BOLD:AAD1395	344	3								BOLD:AAM7337	420
GMP#07726	3	BOLD:AAD1564	345	2								BOLD:AAM7338	421
GMP#07726	3	BOLD:AAD2085	346	1								BOLD:AAM7494	422
GMP#07726	3	BOLD:AAD2144	347	1								BOLD:AAM8964	423
GMP#07726	3	BOLD:AAD4355	348	1								BOLD:AAM8991	424
GMP#07726	3	BOLD:AAD4432	349	2								BOLD:AAM9228	425
GMP#07726	3	BOLD:AAD4764	350	1								BOLD:AAM9252	426
GMP#07726	3	BOLD:AAD5593	351	2								BOLD:AAM9254	427
GMP#07726	3	BOLD:AAD7145	352	1								BOLD:AAN5161	428
GMP#07726	3	BOLD:AAD9052	112	2								BOLD:AAN5162	429
GMP#07726	3	BOLD:AAD9847	113	1								BOLD:AAN5165	430
GMP#07726	3	BOLD:AAE0242	353	1								BOLD:AAN5178	431
GMP#07726	3	BOLD:AAE0707	114	113								BOLD:AAN5193	432
GMP#07726	3	BOLD:AAE0948	354	1								BOLD:AAN5195	433
GMP#07726	3	BOLD:AAE3698	355	1								BOLD:AAN5267	434
GMP#07726	3	BOLD:AAE4298	21	1								BOLD:AAN5345	435
GMP#07726	3	BOLD:AAE8603	356	1								BOLD:AAN5352	436
GMP#07726	3	BOLD:AAE9008	357	1								BOLD:AAN5354	437
GMP#07726	3	BOLD:AAF6259	358	1								BOLD:AAN5429	438
GMP#07726	3	BOLD:AAF7088	359	1								BOLD:AAN5432	439
GMP#07726	3	BOLD:AAF9314	119	3								BOLD:AAN5663	440
GMP#07726	3	BOLD:AAF9316	360	1								BOLD:AAN6148	441
GMP#07726	3	BOLD:AAF9826	361	1								BOLD:AAN6155	442
GMP#07726	3	BOLD:AAG0314	120	2								BOLD:AAN6405	443
GMP#07726	3	BOLD:AAG0920	362	31								BOLD:AAN6430	444
GMP#07726	3	BOLD:AAG0996	363	8								BOLD:AAN6431	445
GMP#07726	3	BOLD:AAG1000	364	1								BOLD:AAN6435	446
GMP#07726	3	BOLD:AAG1002	365	1								BOLD:AAN6447	447
GMP#07726	3	BOLD:AAG1021	124	4								BOLD:AAN7588	448
GMP#07726	3	BOLD:AAG1769	366	1								BOLD:AAN8130	449
GMP#07726	3	BOLD:AAG1998	127	1								BOLD:AAN8137	450
GMP#07726	3	BOLD:AAG2128	128	3								BOLD:AAN8287	451
GMP#07726	3	BOLD:AAG2463	129	1								BOLD:AAN8585	452
GMP#07726	3	BOLD:AAG2740	367	1								BOLD:AAN8693	453
GMP#07726	3	BOLD:AAG3248	132	6								BOLD:AAO0522	454
GMP#07726	3	BOLD:AAG3259	368	1								BOLD:AAO2094	455
GMP#07726	3	BOLD:AAG3260	369	1								BOLD:AAO8579	456
GMP#07726	3	BOLD:AAG3274	26	4								BOLD:AAP2512	457
GMP#07726	3	BOLD:AAG3323	370	2								BOLD:AAP2540	458
GMP#07726	3	BOLD:AAG3340	133	11								BOLD:AAP2968	459
GMP#07726	3	BOLD:AAG4775	371	1								BOLD:AAP2970	460
GMP#07726	3	BOLD:AAG4871	372	3								BOLD:AAP3007	461
GMP#07726	3	BOLD:AAG4893	27	1								BOLD:AAP4687	462
GMP#07726	3	BOLD:AAG4923	373	1								BOLD:AAP4830	463
GMP#07726	3	BOLD:AAG5423	374	4								BOLD:AAP5342	464
GMP#07726	3	BOLD:AAG5455	137	1								BOLD:AAP5870	465
GMP#07726	3	BOLD:AAG5463	375	3								BOLD:AAP6465	466
GMP#07726	3	BOLD:AAG5464	376	2								BOLD:AAP6689	467
GMP#07726	3	BOLD:AAG5467	139	1								BOLD:AAP6915	468
GMP#07726	3	BOLD:AAG5473	377	4								BOLD:AAP7021	469
GMP#07726	3	BOLD:AAG5523	378	1								BOLD:AAP7637	470
GMP#07726	3	BOLD:AAG5542	379	1								BOLD:AAP7841	471
GMP#07726	3	BOLD:AAG6452	380	2								BOLD:AAP8831	472
GMP#07726	3	BOLD:AAG6475	381	2								BOLD:AAP9021	473
GMP#07726	3	BOLD:AAG6743	382	1								BOLD:AAQ0606	474
GMP#07726	3	BOLD:AAG6762	383	1								BOLD:AAQ0634	475
GMP#07726	3	BOLD:AAG6766	384	1								BOLD:AAQ0640	476
GMP#07726	3	BOLD:AAG7070	30	1								BOLD:AAQ0833	477
GMP#07726	3	BOLD:AAG7308	385	1								BOLD:AAU4912	478
GMP#07726	3	BOLD:AAG7737	141	2								BOLD:AAU5682	479
GMP#07726	3	BOLD:AAG7774	33	1								BOLD:AAU6511	480
GMP#07726	3	BOLD:AAG7898	386	2								BOLD:AAU6513	481
GMP#07726	3	BOLD:AAG7977	387	3								BOLD:AAU6535	482
GMP#07726	3	BOLD:AAG8493	388	2								BOLD:AAU6600	483
GMP#07726	3	BOLD:AAG8850	389	1								BOLD:AAU6603	484
GMP#07726	3	BOLD:AAG9055	390	1								BOLD:AAU6615	485
GMP#07726	3	BOLD:AAG9189	391	1								BOLD:AAU6928	486
GMP#07726	3	BOLD:AAG9713	392	32								BOLD:AAU6930	487
GMP#07726	3	BOLD:AAG9897	393	1								BOLD:AAU7040	488
GMP#07726	3	BOLD:AAH0108	394	2								BOLD:AAU7141	489
GMP#07726	3	BOLD:AAH0135	395	3								BOLD:AAU7678	490
GMP#07726	3	BOLD:AAH0256	143	4								BOLD:AAU7760	491
GMP#07726	3	BOLD:AAH1886	144	1								BOLD:AAU8203	492
GMP#07726	3	BOLD:AAH2376	396	1								BOLD:AAU8380	493
GMP#07726	3	BOLD:AAH2378	397	1								BOLD:AAU8455	494
GMP#07726	3	BOLD:AAH2876	398	1								BOLD:AAU8604	495
GMP#07726	3	BOLD:AAH3671	399	1								BOLD:AAU8706	496
GMP#07726	3	BOLD:AAH3904	146	1								BOLD:AAU8803	497
GMP#07726	3	BOLD:AAH3920	147	1								BOLD:AAV0158	498
GMP#07726	3	BOLD:AAH7068	400	3								BOLD:AAV0164	499
GMP#07726	3	BOLD:AAI2721	401	1								BOLD:AAV0168	500
GMP#07726	3	BOLD:AAI2838	402	1								BOLD:AAV1136	501
GMP#07726	3	BOLD:AAI3014	152	32								BOLD:AAV1366	502
GMP#07726	3	BOLD:AAI3015	403	30								BOLD:AAV4004	503
GMP#07726	3	BOLD:AAI6861	404	1								BOLD:AAV4005	504
GMP#07726	3	BOLD:AAI7960	405	3								BOLD:AAV4836	505
GMP#07726	3	BOLD:AAI8935	42	20								BOLD:AAV5098	506
GMP#07726	3	BOLD:AAJ3263	406	1								BOLD:AAV5144	507
GMP#07726	3	BOLD:AAJ4295	43	2								BOLD:AAV5212	508
GMP#07726	3	BOLD:AAJ9649	153	3								BOLD:AAV5888	509
GMP#07726	3	BOLD:AAK7440	407	1								BOLD:AAV5938	510
GMP#07726	3	BOLD:AAL4176	408	8								BOLD:AAV6213	511
GMP#07726	3	BOLD:AAL6962	409	1								BOLD:AAY6452	512
GMP#07726	3	BOLD:AAL7329	410	1								BOLD:AAY6538	513
GMP#07726	3	BOLD:AAL7525	411	1								BOLD:AAY6742	514
GMP#07726	3	BOLD:AAL9075	412	2								BOLD:AAY6752	515
GMP#07726	3	BOLD:AAL9076	159	10								BOLD:AAY9211	516
GMP#07726	3	BOLD:AAL9079	413	2								BOLD:AAZ0166	517
GMP#07726	3	BOLD:AAM6191	45	2								BOLD:AAZ3289	518
GMP#07726	3	BOLD:AAM6230	414	1								BOLD:ABA0771	519
GMP#07726	3	BOLD:AAM6277	415	56								BOLD:ABA0806	520
GMP#07726	3	BOLD:AAM6281	160	2								BOLD:ABA1226	521
GMP#07726	3	BOLD:AAM6286	416	3								BOLD:ABA1235	522
GMP#07726	3	BOLD:AAM6288	46	14								BOLD:ABA2914	523
GMP#07726	3	BOLD:AAM6289	417	1								BOLD:ABA5787	524
GMP#07726	3	BOLD:AAM6293	161	3								BOLD:ABA5797	525
GMP#07726	3	BOLD:AAM6295	418	1								BOLD:ABA5831	526
GMP#07726	3	BOLD:AAM7064	162	1								BOLD:ABA5842	527
GMP#07726	3	BOLD:AAM7333	419	1								BOLD:ABA5945	528
GMP#07726	3	BOLD:AAM7337	420	1								BOLD:ABA6311	529
GMP#07726	3	BOLD:AAM7338	421	1								BOLD:ABA6320	530
GMP#07726	3	BOLD:AAM7487	163	9								BOLD:ABA6338	531
GMP#07726	3	BOLD:AAM7494	422	1								BOLD:ABA6501	532
GMP#07726	3	BOLD:AAM8964	423	1								BOLD:ABA6514	533
GMP#07726	3	BOLD:AAM8991	424	1								BOLD:ABA9096	534
GMP#07726	3	BOLD:AAM9107	47	3								BOLD:ABU5533	535
GMP#07726	3	BOLD:AAM9117	164	1								BOLD:ABU5545	536
GMP#07726	3	BOLD:AAM9228	425	2								BOLD:ABV0480	537
GMP#07726	3	BOLD:AAM9252	426	1								BOLD:ABV1236	538
GMP#07726	3	BOLD:AAM9254	427	1								BOLD:ABV1443	539
GMP#07726	3	BOLD:AAM9347	48	15								BOLD:ABV3021	540
GMP#07726	3	BOLD:AAN5161	428	10								BOLD:ABV9293	541
GMP#07726	3	BOLD:AAN5162	429	15								BOLD:ABV9319	542
GMP#07726	3	BOLD:AAN5165	430	3								BOLD:ABW2834	543
GMP#07726	3	BOLD:AAN5178	431	6								BOLD:ABW3215	544
GMP#07726	3	BOLD:AAN5193	432	1								BOLD:ABW3231	545
GMP#07726	3	BOLD:AAN5195	433	2								BOLD:ABW5540	546
GMP#07726	3	BOLD:AAN5267	434	7								BOLD:ABW7322	547
GMP#07726	3	BOLD:AAN5345	435	1								BOLD:ABW7797	548
GMP#07726	3	BOLD:AAN5348	170	10								BOLD:ABW8053	549
GMP#07726	3	BOLD:AAN5352	436	1								BOLD:ABX0027	550
GMP#07726	3	BOLD:AAN5354	437	3								BOLD:ABX8104	551
GMP#07726	3	BOLD:AAN5355	49	1								BOLD:ABX8236	552
GMP#07726	3	BOLD:AAN5358	50	2								BOLD:ABY0363	553
GMP#07726	3	BOLD:AAN5429	438	1								BOLD:ABY0554	554
GMP#07726	3	BOLD:AAN5432	439	1								BOLD:ABY2749	555
GMP#07726	3	BOLD:AAN5663	440	1								BOLD:ABY3407	556
GMP#07726	3	BOLD:AAN6148	441	1								BOLD:ABY4994	557
GMP#07726	3	BOLD:AAN6154	51	13								BOLD:ABY6869	558
GMP#07726	3	BOLD:AAN6155	442	1								BOLD:ABY7666	559
GMP#07726	3	BOLD:AAN6405	443	2								BOLD:ABY8575	560
GMP#07726	3	BOLD:AAN6430	444	4								BOLD:ABY8834	561
GMP#07726	3	BOLD:AAN6431	445	1								BOLD:ABZ0652	562
GMP#07726	3	BOLD:AAN6435	446	8								BOLD:ABZ3353	563
GMP#07726	3	BOLD:AAN6447	447	4								BOLD:ABZ6565	564
GMP#07726	3	BOLD:AAN7588	448	1								BOLD:ABZ6834	565
GMP#07726	3	BOLD:AAN8130	449	1								BOLD:ACA2954	566
GMP#07726	3	BOLD:AAN8137	450	2								BOLD:ACA3288	567
GMP#07726	3	BOLD:AAN8287	451	3								BOLD:ACA3384	568
GMP#07726	3	BOLD:AAN8585	452	1								BOLD:ACA3626	569
GMP#07726	3	BOLD:AAN8679	52	2								BOLD:ACA4089	570
GMP#07726	3	BOLD:AAN8693	453	1								BOLD:ACA4498	571
GMP#07726	3	BOLD:AAN8770	174	7								BOLD:ACA4924	572
GMP#07726	3	BOLD:AAN9916	176	3								BOLD:ACA7493	573
GMP#07726	3	BOLD:AAO0522	454	2								BOLD:ACA8239	574
GMP#07726	3	BOLD:AAO2094	455	1								BOLD:ACA8939	575
GMP#07726	3	BOLD:AAO8361	177	6								BOLD:ACA9545	576
GMP#07726	3	BOLD:AAO8579	456	1								BOLD:ACB8873	577
GMP#07726	3	BOLD:AAP2512	457	1								BOLD:ACB9323	578
GMP#07726	3	BOLD:AAP2540	458	5								BOLD:ACB9399	579
GMP#07726	3	BOLD:AAP2721	179	5								BOLD:ACC1283	580
GMP#07726	3	BOLD:AAP2907	181	1								BOLD:ACC1769	581
GMP#07726	3	BOLD:AAP2967	53	10								BOLD:ACC2284	582
GMP#07726	3	BOLD:AAP2968	459	2								BOLD:ACC4458	583
GMP#07726	3	BOLD:AAP2970	460	1								BOLD:ACC8414	584
GMP#07726	3	BOLD:AAP3007	461	1								BOLD:ACD0690	585
GMP#07726	3	BOLD:AAP3767	54	5								BOLD:ACD0718	586
GMP#07726	3	BOLD:AAP4687	462	1								BOLD:ACE0635	587
GMP#07726	3	BOLD:AAP4734	183	2								BOLD:ACE0699	588
GMP#07726	3	BOLD:AAP4830	463	2								BOLD:ACE3123	589
GMP#07726	3	BOLD:AAP5342	464	5								BOLD:ACE9710	590
GMP#07726	3	BOLD:AAP5343	184	2								BOLD:ACF0765	591
GMP#07726	3	BOLD:AAP5870	465	1								BOLD:ACF3545	592
GMP#07726	3	BOLD:AAP5920	185	6								BOLD:ACF4734	593
GMP#07726	3	BOLD:AAP6465	466	13								BOLD:ACF7017	594
GMP#07726	3	BOLD:AAP6689	467	3								BOLD:ACF7672	595
GMP#07726	3	BOLD:AAP6873	55	1								BOLD:ACF7714	596
GMP#07726	3	BOLD:AAP6915	468	1								BOLD:ACF7854	597
GMP#07726	3	BOLD:AAP7021	469	1								BOLD:ACF9375	598
GMP#07726	3	BOLD:AAP7637	470	4								BOLD:ACG8210	599
GMP#07726	3	BOLD:AAP7841	471	1								BOLD:ACG9026	600
GMP#07726	3	BOLD:AAP8585	56	12								BOLD:ACH4162	601
GMP#07726	3	BOLD:AAP8654	190	1								BOLD:ACI5062	602
GMP#07726	3	BOLD:AAP8757	191	6								BOLD:ACI5353	603
GMP#07726	3	BOLD:AAP8831	472	1								BOLD:ACI6050	604
GMP#07726	3	BOLD:AAP9021	473	1								BOLD:ACI6861	605
GMP#07726	3	BOLD:AAQ0602	57	5								BOLD:ACI7017	606
GMP#07726	3	BOLD:AAQ0606	474	1								BOLD:ACI7114	607
GMP#07726	3	BOLD:AAQ0634	475	1								BOLD:ACJ3722	608
GMP#07726	3	BOLD:AAQ0640	476	1								BOLD:ACJ5136	609
GMP#07726	3	BOLD:AAQ0833	477	1								BOLD:ACJ6637	610
GMP#07726	3	BOLD:AAU0577	192	1								BOLD:ACJ6804	611
GMP#07726	3	BOLD:AAU4912	478	1								BOLD:ACJ8377	612
GMP#07726	3	BOLD:AAU5682	479	3								BOLD:ACJ8925	613
GMP#07726	3	BOLD:AAU6511	480	2								BOLD:ACK1520	614
GMP#07726	3	BOLD:AAU6513	481	1								BOLD:ACK1651	615
GMP#07726	3	BOLD:AAU6535	482	3								BOLD:ACK2360	616
GMP#07726	3	BOLD:AAU6600	483	1								BOLD:ACK4960	617
GMP#07726	3	BOLD:AAU6603	484	3								BOLD:ACL0119	618
GMP#07726	3	BOLD:AAU6612	194	12								BOLD:ACL0188	619
GMP#07726	3	BOLD:AAU6615	485	2								BOLD:ACL2194	620
GMP#07726	3	BOLD:AAU6624	58	3								BOLD:ACL2308	621
GMP#07726	3	BOLD:AAU6928	486	1								BOLD:ACL2587	622
GMP#07726	3	BOLD:AAU6930	487	1								BOLD:ACL2611	623
GMP#07726	3	BOLD:AAU6970	59	1								BOLD:ACL4888	624
GMP#07726	3	BOLD:AAU7040	488	4								BOLD:ACL5005	625
GMP#07726	3	BOLD:AAU7141	489	1								BOLD:ACL6802	626
GMP#07726	3	BOLD:AAU7678	490	3								BOLD:ACL7820	627
GMP#07726	3	BOLD:AAU7760	491	1								BOLD:ACM0350	628
GMP#07726	3	BOLD:AAU8203	492	12								BOLD:ACM1165	629
GMP#07726	3	BOLD:AAU8358	198	2								BOLD:ACM1395	630
GMP#07726	3	BOLD:AAU8377	199	2								BOLD:ACM1549	631
GMP#07726	3	BOLD:AAU8380	493	2								BOLD:ACM1800	632
GMP#07726	3	BOLD:AAU8455	494	11								BOLD:ACM1999	633
GMP#07726	3	BOLD:AAU8604	495	3								BOLD:ACM2272	634
GMP#07726	3	BOLD:AAU8706	496	1								BOLD:ACM2385	635
GMP#07726	3	BOLD:AAU8803	497	2								BOLD:ACM9731	636
GMP#07726	3	BOLD:AAV0157	203	22								BOLD:ACN2444	637
GMP#07726	3	BOLD:AAV0158	498	1								BOLD:ACN5657	638
GMP#07726	3	BOLD:AAV0161	204	7								BOLD:ACP7579	639
GMP#07726	3	BOLD:AAV0164	499	1								BOLD:ACQ2060	640
GMP#07726	3	BOLD:AAV0165	205	1								BOLD:ACQ6990	641
GMP#07726	3	BOLD:AAV0168	500	2								BOLD:ACQ9042	642
GMP#07726	3	BOLD:AAV1136	501	1								BOLD:ACQ9861	643
GMP#07726	3	BOLD:AAV1366	502	1								BOLD:ACR4350	644
GMP#07726	3	BOLD:AAV4004	503	1								BOLD:ACR6101	645
GMP#07726	3	BOLD:AAV4005	504	1								BOLD:ACR6132	646
GMP#07726	3	BOLD:AAV4836	505	1								BOLD:ACT8182	647
GMP#07726	3	BOLD:AAV5098	506	1								BOLD:ACU2906	648
GMP#07726	3	BOLD:AAV5144	507	1								BOLD:ACU2992	649
GMP#07726	3	BOLD:AAV5212	508	1								BOLD:ACU4080	650
GMP#07726	3	BOLD:AAV5888	509	1								BOLD:ACV1921	651
GMP#07726	3	BOLD:AAV5938	510	1								BOLD:ACV1942	652
GMP#07726	3	BOLD:AAV6213	511	1								BOLD:ACV2288	653
GMP#07726	3	BOLD:AAY6412	207	1								BOLD:ACV2367	654
GMP#07726	3	BOLD:AAY6452	512	1								BOLD:ACV2800	655
GMP#07726	3	BOLD:AAY6538	513	1								BOLD:ACV3023	656
GMP#07726	3	BOLD:AAY6738	209	38								BOLD:ACV3072	657
GMP#07726	3	BOLD:AAY6742	514	1								BOLD:ACV3127	658
GMP#07726	3	BOLD:AAY6747	210	3								BOLD:ACV3141	659
GMP#07726	3	BOLD:AAY6751	211	5								BOLD:ACV3306	660
GMP#07726	3	BOLD:AAY6752	515	2								BOLD:ACV3338	661
GMP#07726	3	BOLD:AAY9211	516	1								BOLD:ACV3598	662
GMP#07726	3	BOLD:AAZ0166	517	2								BOLD:ACV3604	663
GMP#07726	3	BOLD:AAZ3289	518	1								BOLD:ACV3622	664
GMP#07726	3	BOLD:AAZ8495	214	21								BOLD:ACV3674	665
GMP#07726	3	BOLD:ABA0771	519	3								BOLD:ACV3779	666
GMP#07726	3	BOLD:ABA0806	520	1								BOLD:ACV3846	667
GMP#07726	3	BOLD:ABA1217	218	23								BOLD:ACV3870	668
GMP#07726	3	BOLD:ABA1219	219	6								BOLD:ACV3950	669
GMP#07726	3	BOLD:ABA1220	220	1								BOLD:ACV3952	670
GMP#07726	3	BOLD:ABA1222	63	65								BOLD:ACV3989	671
GMP#07726	3	BOLD:ABA1223	64	8								BOLD:ACV3992	672
GMP#07726	3	BOLD:ABA1225	65	1								BOLD:ACV4007	673
GMP#07726	3	BOLD:ABA1226	521	1								BOLD:ACV4008	674
GMP#07726	3	BOLD:ABA1231	221	2								BOLD:ACV4031	675
GMP#07726	3	BOLD:ABA1235	522	2								BOLD:ACV4054	676
GMP#07726	3	BOLD:ABA2914	523	1								BOLD:ACV4056	677
GMP#07726	3	BOLD:ABA3960	222	1								BOLD:ACV4141	678
GMP#07726	3	BOLD:ABA5771	223	5								BOLD:ACV4221	679
GMP#07726	3	BOLD:ABA5772	224	14								BOLD:ACV4509	680
GMP#07726	3	BOLD:ABA5787	524	5								BOLD:ACV4516	681
GMP#07726	3	BOLD:ABA5797	525	1								BOLD:ACV4673	682
GMP#07726	3	BOLD:ABA5798	226	3								BOLD:ACV4680	683
GMP#07726	3	BOLD:ABA5830	228	1								BOLD:ACV4707	684
GMP#07726	3	BOLD:ABA5831	526	1								BOLD:ACV4825	685
GMP#07726	3	BOLD:ABA5842	527	1								BOLD:ACV4844	686
GMP#07726	3	BOLD:ABA5864	229	3								BOLD:ACV5074	687
GMP#07726	3	BOLD:ABA5903	230	3								BOLD:ACV5201	688
GMP#07726	3	BOLD:ABA5945	528	1								BOLD:ACV5324	689
GMP#07726	3	BOLD:ABA6311	529	5								BOLD:ACV5328	690
GMP#07726	3	BOLD:ABA6320	530	8								BOLD:ACV5478	691
GMP#07726	3	BOLD:ABA6338	531	1								BOLD:ACV5706	692
GMP#07726	3	BOLD:ABA6501	532	1								BOLD:ACW0823	693
GMP#07726	3	BOLD:ABA6514	533	1								BOLD:AAA1467	694
GMP#07726	3	BOLD:ABA9096	534	1								BOLD:AAA1962	695
GMP#07726	3	BOLD:ABU5520	232	4								BOLD:AAA2079	696
GMP#07726	3	BOLD:ABU5525	69	4								BOLD:AAA3817	697
GMP#07726	3	BOLD:ABU5526	70	173								BOLD:AAA4130	698
GMP#07726	3	BOLD:ABU5528	233	5								BOLD:AAA6924	699
GMP#07726	3	BOLD:ABU5533	535	3								BOLD:AAA6926	700
GMP#07726	3	BOLD:ABU5545	536	1								BOLD:AAA7272	701
GMP#07726	3	BOLD:ABU9891	234	5								BOLD:AAA8109	702
GMP#07726	3	BOLD:ABV0480	537	1								BOLD:AAA9386	703
GMP#07726	3	BOLD:ABV1236	538	2								BOLD:AAB0001	704
GMP#07726	3	BOLD:ABV1241	235	3								BOLD:AAB0185	705
GMP#07726	3	BOLD:ABV1277	236	2								BOLD:AAB1850	706
GMP#07726	3	BOLD:ABV1314	237	2								BOLD:AAB7007	707
GMP#07726	3	BOLD:ABV1443	539	1								BOLD:AAB8845	708
GMP#07726	3	BOLD:ABV3021	540	1								BOLD:AAC1036	709
GMP#07726	3	BOLD:ABV9293	541	1								BOLD:AAC4523	710
GMP#07726	3	BOLD:ABV9306	239	22								BOLD:AAC6630	711
GMP#07726	3	BOLD:ABV9319	542	1								BOLD:AAC7655	712
GMP#07726	3	BOLD:ABW1307	240	1								BOLD:AAD4513	713
GMP#07726	3	BOLD:ABW1310	73	6								BOLD:AAD5194	714
GMP#07726	3	BOLD:ABW2834	543	1								BOLD:AAD6445	715
GMP#07726	3	BOLD:ABW3215	544	2								BOLD:AAE1939	716
GMP#07726	3	BOLD:ABW3231	545	2								BOLD:AAE5602	717
GMP#07726	3	BOLD:ABW5502	242	1								BOLD:AAE6458	718
GMP#07726	3	BOLD:ABW5540	546	1								BOLD:AAE7388	719
GMP#07726	3	BOLD:ABW5634	243	4								BOLD:AAE9937	720
GMP#07726	3	BOLD:ABW7322	547	2								BOLD:AAF1051	721
GMP#07726	3	BOLD:ABW7654	244	1								BOLD:AAF3365	722
GMP#07726	3	BOLD:ABW7797	548	7								BOLD:AAF4394	723
GMP#07726	3	BOLD:ABW8053	549	2								BOLD:AAF7523	724
GMP#07726	3	BOLD:ABX0027	550	1								BOLD:AAF9285	725
GMP#07726	3	BOLD:ABX0273	245	1								BOLD:AAF9319	726
GMP#07726	3	BOLD:ABX5713	246	5								BOLD:AAF9772	727
GMP#07726	3	BOLD:ABX7281	247	1								BOLD:AAF9791	728
GMP#07726	3	BOLD:ABX8104	551	1								BOLD:AAG0387	729
GMP#07726	3	BOLD:ABX8236	552	7								BOLD:AAG1005	730
GMP#07726	3	BOLD:ABX9019	248	5								BOLD:AAG1128	731
GMP#07726	3	BOLD:ABY0363	553	4								BOLD:AAG2460	732
GMP#07726	3	BOLD:ABY0554	554	1								BOLD:AAG2754	733
GMP#07726	3	BOLD:ABY2749	555	2								BOLD:AAG2899	734
GMP#07726	3	BOLD:ABY3407	556	1								BOLD:AAG3190	735
GMP#07726	3	BOLD:ABY4994	557	1								BOLD:AAG3241	736
GMP#07726	3	BOLD:ABY6869	558	5								BOLD:AAG3261	737
GMP#07726	3	BOLD:ABY7153	75	1								BOLD:AAG3331	738
GMP#07726	3	BOLD:ABY7666	559	1								BOLD:AAG3625	739
GMP#07726	3	BOLD:ABY8347	249	1								BOLD:AAG4679	740
GMP#07726	3	BOLD:ABY8575	560	1								BOLD:AAG4907	741
GMP#07726	3	BOLD:ABY8834	561	1								BOLD:AAG5478	742
GMP#07726	3	BOLD:ABY9043	250	1								BOLD:AAG5506	743
GMP#07726	3	BOLD:ABZ0652	562	2								BOLD:AAG5541	744
GMP#07726	3	BOLD:ABZ1306	252	1								BOLD:AAG6494	745
GMP#07726	3	BOLD:ABZ1424	253	1								BOLD:AAG7032	746
GMP#07726	3	BOLD:ABZ2493	254	6								BOLD:AAG7312	747
GMP#07726	3	BOLD:ABZ3353	563	1								BOLD:AAG7679	748
GMP#07726	3	BOLD:ABZ6565	564	1								BOLD:AAG7710	749
GMP#07726	3	BOLD:ABZ6834	565	2								BOLD:AAG7788	750
GMP#07726	3	BOLD:ACA2954	566	1								BOLD:AAG7897	751
GMP#07726	3	BOLD:ACA3288	567	1								BOLD:AAG7899	752
GMP#07726	3	BOLD:ACA3384	568	1								BOLD:AAG8091	753
GMP#07726	3	BOLD:ACA3626	569	2								BOLD:AAG8323	754
GMP#07726	3	BOLD:ACA4089	570	1								BOLD:AAH0212	755
GMP#07726	3	BOLD:ACA4498	571	1								BOLD:AAH1692	756
GMP#07726	3	BOLD:ACA4924	572	1								BOLD:AAH1693	757
GMP#07726	3	BOLD:ACA7493	573	1								BOLD:AAH1793	758
GMP#07726	3	BOLD:ACA8239	574	2								BOLD:AAH2004	759
GMP#07726	3	BOLD:ACA8939	575	1								BOLD:AAH2370	760
GMP#07726	3	BOLD:ACA9545	576	2								BOLD:AAH3504	761
GMP#07726	3	BOLD:ACB8873	577	1								BOLD:AAH3617	762
GMP#07726	3	BOLD:ACB9323	578	2								BOLD:AAH3720	763
GMP#07726	3	BOLD:ACB9399	579	1								BOLD:AAH3741	764
GMP#07726	3	BOLD:ACB9781	257	1								BOLD:AAH3755	765
GMP#07726	3	BOLD:ACC0651	80	41								BOLD:AAH3947	766
GMP#07726	3	BOLD:ACC1283	580	1								BOLD:AAH3968	767
GMP#07726	3	BOLD:ACC1769	581	1								BOLD:AAH3983	768
GMP#07726	3	BOLD:ACC2284	582	1								BOLD:AAH4013	769
GMP#07726	3	BOLD:ACC4458	583	1								BOLD:AAH4225	770
GMP#07726	3	BOLD:ACC5439	259	1								BOLD:AAH4497	771
GMP#07726	3	BOLD:ACC5761	261	3								BOLD:AAH9376	772
GMP#07726	3	BOLD:ACC8414	584	1								BOLD:AAI0332	773
GMP#07726	3	BOLD:ACC9435	263	2								BOLD:AAI1549	774
GMP#07726	3	BOLD:ACD0202	264	1								BOLD:AAI2689	775
GMP#07726	3	BOLD:ACD0690	585	1								BOLD:AAI3547	776
GMP#07726	3	BOLD:ACD0718	586	2								BOLD:AAI5103	777
GMP#07726	3	BOLD:ACD3877	266	4								BOLD:AAJ4031	778
GMP#07726	3	BOLD:ACE0635	587	1								BOLD:AAJ6986	779
GMP#07726	3	BOLD:ACE0660	268	1								BOLD:AAJ9681	780
GMP#07726	3	BOLD:ACE0699	588	3								BOLD:AAL0380	781
GMP#07726	3	BOLD:ACE3123	589	1								BOLD:AAL7356	782
GMP#07726	3	BOLD:ACE5102	270	1								BOLD:AAL7370	783
GMP#07726	3	BOLD:ACE9710	590	1								BOLD:AAM1947	784
GMP#07726	3	BOLD:ACF0765	591	2								BOLD:AAM6273	785
GMP#07726	3	BOLD:ACF2457	272	8								BOLD:AAM7339	786
GMP#07726	3	BOLD:ACF2821	273	6								BOLD:AAM7401	787
GMP#07726	3	BOLD:ACF3545	592	1								BOLD:AAM7733	788
GMP#07726	3	BOLD:ACF4734	593	2								BOLD:AAM7740	789
GMP#07726	3	BOLD:ACF7017	594	2								BOLD:AAM9243	790
GMP#07726	3	BOLD:ACF7672	595	1								BOLD:AAN5233	791
GMP#07726	3	BOLD:ACF7714	596	2								BOLD:AAN5235	792
GMP#07726	3	BOLD:ACF7854	597	2								BOLD:AAN5249	793
GMP#07726	3	BOLD:ACF8472	279	1								BOLD:AAN5261	794
GMP#07726	3	BOLD:ACF8829	280	4								BOLD:AAN5269	795
GMP#07726	3	BOLD:ACF9074	281	6								BOLD:AAN5311	796
GMP#07726	3	BOLD:ACF9268	282	1								BOLD:AAN5332	797
GMP#07726	3	BOLD:ACF9375	598	1								BOLD:AAN5369	798
GMP#07726	3	BOLD:ACG8210	599	2								BOLD:AAN6415	799
GMP#07726	3	BOLD:ACG9026	600	1								BOLD:AAN6433	800
GMP#07726	3	BOLD:ACG9235	284	1								BOLD:AAN6445	801
GMP#07726	3	BOLD:ACH4162	601	2								BOLD:AAN6706	802
GMP#07726	3	BOLD:ACI5062	602	1								BOLD:AAN9807	803
GMP#07726	3	BOLD:ACI5353	603	87								BOLD:AAO0157	804
GMP#07726	3	BOLD:ACI6050	604	1								BOLD:AAO7716	805
GMP#07726	3	BOLD:ACI6861	605	1								BOLD:AAO8147	806
GMP#07726	3	BOLD:ACI7017	606	2								BOLD:AAP2854	807
GMP#07726	3	BOLD:ACI7114	607	1								BOLD:AAP2855	808
GMP#07726	3	BOLD:ACJ1417	288	1								BOLD:AAP2857	809
GMP#07726	3	BOLD:ACJ3722	608	1								BOLD:AAP2858	810
GMP#07726	3	BOLD:ACJ5136	609	1								BOLD:AAP2973	811
GMP#07726	3	BOLD:ACJ6637	610	1								BOLD:AAP2998	812
GMP#07726	3	BOLD:ACJ6804	611	1								BOLD:AAP4733	813
GMP#07726	3	BOLD:ACJ8377	612	2								BOLD:AAP6878	814
GMP#07726	3	BOLD:ACJ8925	613	1								BOLD:AAP6882	815
GMP#07726	3	BOLD:ACK1520	614	1								BOLD:AAP6949	816
GMP#07726	3	BOLD:ACK1651	615	1								BOLD:AAP7035	817
GMP#07726	3	BOLD:ACK1847	290	3								BOLD:AAP7640	818
GMP#07726	3	BOLD:ACK2360	616	1								BOLD:AAP8724	819
GMP#07726	3	BOLD:ACK3871	292	1								BOLD:AAP9022	820
GMP#07726	3	BOLD:ACK4960	617	1								BOLD:AAQ0583	821
GMP#07726	3	BOLD:ACL0119	618	2								BOLD:AAQ0599	822
GMP#07726	3	BOLD:ACL0188	619	1								BOLD:AAQ0642	823
GMP#07726	3	BOLD:ACL2194	620	1								BOLD:AAQ2937	824
GMP#07726	3	BOLD:ACL2308	621	1								BOLD:AAU4913	825
GMP#07726	3	BOLD:ACL2587	622	1								BOLD:AAU6614	826
GMP#07726	3	BOLD:ACL2611	623	4								BOLD:AAU6618	827
GMP#07726	3	BOLD:ACL3048	295	3								BOLD:AAU6620	828
GMP#07726	3	BOLD:ACL4888	624	1								BOLD:AAU6626	829
GMP#07726	3	BOLD:ACL5005	625	1								BOLD:AAU6629	830
GMP#07726	3	BOLD:ACL6239	89	5								BOLD:AAU6966	831
GMP#07726	3	BOLD:ACL6802	626	2								BOLD:AAU8342	832
GMP#07726	3	BOLD:ACL7820	627	1								BOLD:AAU8365	833
GMP#07726	3	BOLD:ACM0350	628	1								BOLD:AAU8372	834
GMP#07726	3	BOLD:ACM1165	629	1								BOLD:AAU8376	835
GMP#07726	3	BOLD:ACM1395	630	2								BOLD:AAU8384	836
GMP#07726	3	BOLD:ACM1549	631	14								BOLD:AAU8389	837
GMP#07726	3	BOLD:ACM1800	632	1								BOLD:AAU8441	838
GMP#07726	3	BOLD:ACM1999	633	5								BOLD:AAU8485	839
GMP#07726	3	BOLD:ACM2009	90	1								BOLD:AAU8680	840
GMP#07726	3	BOLD:ACM2272	634	1								BOLD:AAU8749	841
GMP#07726	3	BOLD:ACM2385	635	1								BOLD:AAU9339	842
GMP#07726	3	BOLD:ACM6785	301	1								BOLD:AAV0903	843
GMP#07726	3	BOLD:ACM9731	636	1								BOLD:AAV1302	844
GMP#07726	3	BOLD:ACN2444	637	10								BOLD:AAV5088	845
GMP#07726	3	BOLD:ACN5657	638	1								BOLD:AAV5793	846
GMP#07726	3	BOLD:ACP4736	91	2								BOLD:AAV5942	847
GMP#07726	3	BOLD:ACP7579	639	1								BOLD:AAY6456	848
GMP#07726	3	BOLD:ACQ2060	640	1								BOLD:AAY6464	849
GMP#07726	3	BOLD:ACQ3943	304	9								BOLD:AAY6734	850
GMP#07726	3	BOLD:ACQ6990	641	1								BOLD:AAY6736	851
GMP#07726	3	BOLD:ACQ8506	305	1								BOLD:AAY9207	852
GMP#07726	3	BOLD:ACQ9042	642	1								BOLD:AAY9807	853
GMP#07726	3	BOLD:ACQ9861	643	1								BOLD:AAZ0144	854
GMP#07726	3	BOLD:ACR4350	644	1								BOLD:AAZ0238	855
GMP#07726	3	BOLD:ACR6101	645	2								BOLD:AAZ5511	856
GMP#07726	3	BOLD:ACR6132	646	3								BOLD:AAZ5599	857
GMP#07726	3	BOLD:ACT8182	647	1								BOLD:AAZ5626	858
GMP#07726	3	BOLD:ACU2906	648	14								BOLD:AAZ5700	859
GMP#07726	3	BOLD:ACU2992	649	2								BOLD:AAZ8146	860
GMP#07726	3	BOLD:ACU4080	650	1								BOLD:ABA0844	861
GMP#07726	3	BOLD:ACU6504	308	1								BOLD:ABA0863	862
GMP#07726	3	BOLD:ACU7906	309	4								BOLD:ABA5930	863
GMP#07726	3	BOLD:ACV1921	651	2								BOLD:ABA5944	864
GMP#07726	3	BOLD:ACV1942	652	1								BOLD:ABA6297	865
GMP#07726	3	BOLD:ACV2288	653	1								BOLD:ABA6440	866
GMP#07726	3	BOLD:ACV2335	311	1								BOLD:ABA6448	867
GMP#07726	3	BOLD:ACV2367	654	1								BOLD:ABA6478	868
GMP#07726	3	BOLD:ACV2800	655	1								BOLD:ABA8048	869
GMP#07726	3	BOLD:ACV3023	656	1								BOLD:ABA9093	870
GMP#07726	3	BOLD:ACV3072	657	1								BOLD:ABV1222	871
GMP#07726	3	BOLD:ACV3127	658	2								BOLD:ABV1243	872
GMP#07726	3	BOLD:ACV3141	659	1								BOLD:ABV1265	873
GMP#07726	3	BOLD:ACV3306	660	14								BOLD:ABV1337	874
GMP#07726	3	BOLD:ACV3338	661	1								BOLD:ABV1354	875
GMP#07726	3	BOLD:ACV3598	662	1								BOLD:ABV1379	876
GMP#07726	3	BOLD:ACV3604	663	1								BOLD:ABV1455	877
GMP#07726	3	BOLD:ACV3622	664	6								BOLD:ABV2644	878
GMP#07726	3	BOLD:ACV3674	665	1								BOLD:ABV3010	879
GMP#07726	3	BOLD:ACV3779	666	1								BOLD:ABV9019	880
GMP#07726	3	BOLD:ACV3846	667	1								BOLD:ABV9277	881
GMP#07726	3	BOLD:ACV3870	668	1								BOLD:ABV9378	882
GMP#07726	3	BOLD:ACV3950	669	1								BOLD:ABW0442	883
GMP#07726	3	BOLD:ACV3952	670	1								BOLD:ABW1309	884
GMP#07726	3	BOLD:ACV3989	671	1								BOLD:ABW1321	885
GMP#07726	3	BOLD:ACV3992	672	1								BOLD:ABW1518	886
GMP#07726	3	BOLD:ACV4007	673	1								BOLD:ABW3187	887
GMP#07726	3	BOLD:ACV4008	674	1								BOLD:ABW3282	888
GMP#07726	3	BOLD:ACV4031	675	1								BOLD:ABW3307	889
GMP#07726	3	BOLD:ACV4054	676	2								BOLD:ABW7321	890
GMP#07726	3	BOLD:ACV4056	677	1								BOLD:ABW8040	891
GMP#07726	3	BOLD:ACV4141	678	1								BOLD:ABW8065	892
GMP#07726	3	BOLD:ACV4221	679	1								BOLD:ABX5561	893
GMP#07726	3	BOLD:ACV4509	680	6								BOLD:ABX8472	894
GMP#07726	3	BOLD:ACV4516	681	1								BOLD:ABX8601	895
GMP#07726	3	BOLD:ACV4673	682	3								BOLD:ABY2035	896
GMP#07726	3	BOLD:ACV4680	683	1								BOLD:ABY9046	897
GMP#07726	3	BOLD:ACV4707	684	1								BOLD:ABZ1036	898
GMP#07726	3	BOLD:ACV4825	685	1								BOLD:ABZ1975	899
GMP#07726	3	BOLD:ACV4844	686	1								BOLD:ABZ2516	900
GMP#07726	3	BOLD:ACV5074	687	1								BOLD:ABZ3625	901
GMP#07726	3	BOLD:ACV5201	688	1								BOLD:ABZ6353	902
GMP#07726	3	BOLD:ACV5324	689	1								BOLD:ABZ7151	903
GMP#07726	3	BOLD:ACV5328	690	1								BOLD:ACA1234	904
GMP#07726	3	BOLD:ACV5478	691	1								BOLD:ACA3426	905
GMP#07726	3	BOLD:ACV5706	692	1								BOLD:ACA4847	906
GMP#07726	3	BOLD:ACV5777	317	4								BOLD:ACA8801	907
GMP#07726	3	BOLD:ACW0823	693	1								BOLD:ACA9051	908
GMP#07727	4	BOLD:AAA1467	694	1								BOLD:ACB1266	909
GMP#07727	4	BOLD:AAA1962	695	1								BOLD:ACB3271	910
GMP#07727	4	BOLD:AAA2052	318	6								BOLD:ACB9392	911
GMP#07727	4	BOLD:AAA2079	696	2								BOLD:ACB9959	912
GMP#07727	4	BOLD:AAA2368	319	2								BOLD:ACC1288	913
GMP#07727	4	BOLD:AAA3453	1	1								BOLD:ACC7921	914
GMP#07727	4	BOLD:AAA3817	697	3								BOLD:ACC8799	915
GMP#07727	4	BOLD:AAA4119	322	1								BOLD:ACD1218	916
GMP#07727	4	BOLD:AAA4128	3	1								BOLD:ACD9424	917
GMP#07727	4	BOLD:AAA4130	698	1								BOLD:ACE3609	918
GMP#07727	4	BOLD:AAA6924	699	1								BOLD:ACE4814	919
GMP#07727	4	BOLD:AAA6926	700	2								BOLD:ACE5263	920
GMP#07727	4	BOLD:AAA7249	5	8								BOLD:ACE5640	921
GMP#07727	4	BOLD:AAA7272	701	2								BOLD:ACE7452	922
GMP#07727	4	BOLD:AAA7374	96	9								BOLD:ACE7580	923
GMP#07727	4	BOLD:AAA7667	6	2								BOLD:ACE9045	924
GMP#07727	4	BOLD:AAA8109	702	1								BOLD:ACF6671	925
GMP#07727	4	BOLD:AAA9049	98	1								BOLD:ACF7512	926
GMP#07727	4	BOLD:AAA9386	703	1								BOLD:ACF9546	927
GMP#07727	4	BOLD:AAA9461	99	4								BOLD:ACF9756	928
GMP#07727	4	BOLD:AAB0001	704	1								BOLD:ACG2115	929
GMP#07727	4	BOLD:AAB0185	705	1								BOLD:ACG3753	930
GMP#07727	4	BOLD:AAB1098	327	1								BOLD:ACG4079	931
GMP#07727	4	BOLD:AAB1850	706	1								BOLD:ACG4118	932
GMP#07727	4	BOLD:AAB2644	9	27								BOLD:ACG4218	933
GMP#07727	4	BOLD:AAB2866	329	7								BOLD:ACG6639	934
GMP#07727	4	BOLD:AAB4931	330	1								BOLD:ACH2330	935
GMP#07727	4	BOLD:AAB7007	707	1								BOLD:ACI3514	936
GMP#07727	4	BOLD:AAB7030	331	1								BOLD:ACI3882	937
GMP#07727	4	BOLD:AAB7534	335	2								BOLD:ACJ0017	938
GMP#07727	4	BOLD:AAB8845	708	1								BOLD:ACJ0844	939
GMP#07727	4	BOLD:AAB9140	15	1								BOLD:ACJ3516	940
GMP#07727	4	BOLD:AAC0205	16	1								BOLD:ACJ5130	941
GMP#07727	4	BOLD:AAC0706	337	17								BOLD:ACJ5224	942
GMP#07727	4	BOLD:AAC1036	709	1								BOLD:ACJ6984	943
GMP#07727	4	BOLD:AAC1302	17	3								BOLD:ACJ7008	944
GMP#07727	4	BOLD:AAC1312	338	6								BOLD:ACJ8807	945
GMP#07727	4	BOLD:AAC2498	339	3								BOLD:ACJ9045	946
GMP#07727	4	BOLD:AAC4197	104	2								BOLD:ACJ9109	947
GMP#07727	4	BOLD:AAC4523	710	7								BOLD:ACK1586	948
GMP#07727	4	BOLD:AAC4525	340	10								BOLD:ACK1679	949
GMP#07727	4	BOLD:AAC6630	711	1								BOLD:ACK2715	950
GMP#07727	4	BOLD:AAC7655	712	1								BOLD:ACK2907	951
GMP#07727	4	BOLD:AAC8567	341	1								BOLD:ACK5235	952
GMP#07727	4	BOLD:AAC8595	106	2								BOLD:ACK5386	953
GMP#07727	4	BOLD:AAC8842	342	1								BOLD:ACK7034	954
GMP#07727	4	BOLD:AAD1395	344	10								BOLD:ACK7314	955
GMP#07727	4	BOLD:AAD2085	346	1								BOLD:ACL0470	956
GMP#07727	4	BOLD:AAD2144	347	3								BOLD:ACL0478	957
GMP#07727	4	BOLD:AAD4355	348	1								BOLD:ACL5173	958
GMP#07727	4	BOLD:AAD4513	713	1								BOLD:ACL7003	959
GMP#07727	4	BOLD:AAD5194	714	3								BOLD:ACL8091	960
GMP#07727	4	BOLD:AAD5253	20	4								BOLD:ACL8125	961
GMP#07727	4	BOLD:AAD5593	351	1								BOLD:ACM1798	962
GMP#07727	4	BOLD:AAD6445	715	2								BOLD:ACM2015	963
GMP#07727	4	BOLD:AAD7604	111	1								BOLD:ACM2941	964
GMP#07727	4	BOLD:AAE0707	114	5								BOLD:ACM3263	965
GMP#07727	4	BOLD:AAE1939	716	1								BOLD:ACM6155	966
GMP#07727	4	BOLD:AAE4298	21	1								BOLD:ACM8656	967
GMP#07727	4	BOLD:AAE5602	717	1								BOLD:ACO6056	968
GMP#07727	4	BOLD:AAE6458	718	1								BOLD:ACO8570	969
GMP#07727	4	BOLD:AAE7388	719	1								BOLD:ACP3071	970
GMP#07727	4	BOLD:AAE9008	357	1								BOLD:ACP7395	971
GMP#07727	4	BOLD:AAE9937	720	2								BOLD:ACP9550	972
GMP#07727	4	BOLD:AAF1051	721	1								BOLD:ACR1960	973
GMP#07727	4	BOLD:AAF3365	722	1								BOLD:ACR6131	974
GMP#07727	4	BOLD:AAF4394	723	1								BOLD:ACR8658	975
GMP#07727	4	BOLD:AAF7523	724	3								BOLD:ACS9433	976
GMP#07727	4	BOLD:AAF9285	725	1								BOLD:ACT0257	977
GMP#07727	4	BOLD:AAF9314	119	1								BOLD:ACT6224	978
GMP#07727	4	BOLD:AAF9319	726	1								BOLD:ACU5376	979
GMP#07727	4	BOLD:AAF9772	727	1								BOLD:ACV1788	980
GMP#07727	4	BOLD:AAF9791	728	1								BOLD:ACV1904	981
GMP#07727	4	BOLD:AAF9826	361	6								BOLD:ACV2090	982
GMP#07727	4	BOLD:AAG0314	120	1								BOLD:ACV2155	983
GMP#07727	4	BOLD:AAG0387	729	1								BOLD:ACV2297	984
GMP#07727	4	BOLD:AAG0920	362	5								BOLD:ACV2298	985
GMP#07727	4	BOLD:AAG0996	363	8								BOLD:ACV2330	986
GMP#07727	4	BOLD:AAG1005	730	3								BOLD:ACV2372	987
GMP#07727	4	BOLD:AAG1128	731	1								BOLD:ACV2386	988
GMP#07727	4	BOLD:AAG1742	23	2								BOLD:ACV2603	989
GMP#07727	4	BOLD:AAG2128	128	4								BOLD:ACV2795	990
GMP#07727	4	BOLD:AAG2460	732	1								BOLD:ACV2942	991
GMP#07727	4	BOLD:AAG2754	733	1								BOLD:ACV2997	992
GMP#07727	4	BOLD:AAG2812	131	1								BOLD:ACV3190	993
GMP#07727	4	BOLD:AAG2899	734	1								BOLD:ACV3286	994
GMP#07727	4	BOLD:AAG3190	735	1								BOLD:ACV3335	995
GMP#07727	4	BOLD:AAG3241	736	1								BOLD:ACV3407	996
GMP#07727	4	BOLD:AAG3248	132	2								BOLD:ACV3571	997
GMP#07727	4	BOLD:AAG3261	737	2								BOLD:ACV3706	998
GMP#07727	4	BOLD:AAG3331	738	1								BOLD:ACV3828	999
GMP#07727	4	BOLD:AAG3340	133	5								BOLD:ACV3899	1000
GMP#07727	4	BOLD:AAG3625	739	3								BOLD:ACV3990	1001
GMP#07727	4	BOLD:AAG4679	740	1								BOLD:ACV3991	1002
GMP#07727	4	BOLD:AAG4775	371	4								BOLD:ACV4024	1003
GMP#07727	4	BOLD:AAG4893	27	1								BOLD:ACV4035	1004
GMP#07727	4	BOLD:AAG4907	741	2								BOLD:ACV4116	1005
GMP#07727	4	BOLD:AAG4923	373	1								BOLD:ACV4140	1006
GMP#07727	4	BOLD:AAG5423	374	7								BOLD:ACV4250	1007
GMP#07727	4	BOLD:AAG5457	138	1								BOLD:ACV4280	1008
GMP#07727	4	BOLD:AAG5463	375	2								BOLD:ACV4527	1009
GMP#07727	4	BOLD:AAG5464	376	3								BOLD:ACV4544	1010
GMP#07727	4	BOLD:AAG5473	377	5								BOLD:ACV4577	1011
GMP#07727	4	BOLD:AAG5478	742	1								BOLD:ACV5348	1012
GMP#07727	4	BOLD:AAG5506	743	4								BOLD:ACV5403	1013
GMP#07727	4	BOLD:AAG5523	378	3								BOLD:ACV5952	1014
GMP#07727	4	BOLD:AAG5541	744	2								BOLD:ACW2022	1015
GMP#07727	4	BOLD:AAG6475	381	1								BOLD:AAA1517	1016
GMP#07727	4	BOLD:AAG6494	745	1								BOLD:AAA2254	1017
GMP#07727	4	BOLD:AAG6743	382	1								BOLD:AAA3782	1018
GMP#07727	4	BOLD:AAG6745	28	1								BOLD:AAA3933	1019
GMP#07727	4	BOLD:AAG6762	383	3								BOLD:AAA4097	1020
GMP#07727	4	BOLD:AAG7032	746	3								BOLD:AAA4277	1021
GMP#07727	4	BOLD:AAG7308	385	1								BOLD:AAA4781	1022
GMP#07727	4	BOLD:AAG7312	747	1								BOLD:AAA4782	1023
GMP#07727	4	BOLD:AAG7679	748	1								BOLD:AAA5522	1024
GMP#07727	4	BOLD:AAG7710	749	1								BOLD:AAA6652	1025
GMP#07727	4	BOLD:AAG7774	33	1								BOLD:AAA7636	1026
GMP#07727	4	BOLD:AAG7788	750	1								BOLD:AAA8046	1027
GMP#07727	4	BOLD:AAG7897	751	1								BOLD:AAA9422	1028
GMP#07727	4	BOLD:AAG7898	386	1								BOLD:AAA9506	1029
GMP#07727	4	BOLD:AAG7899	752	1								BOLD:AAB0520	1030
GMP#07727	4	BOLD:AAG7977	387	4								BOLD:AAB1188	1031
GMP#07727	4	BOLD:AAG8091	753	1								BOLD:AAB2744	1032
GMP#07727	4	BOLD:AAG8323	754	1								BOLD:AAB4181	1033
GMP#07727	4	BOLD:AAG8493	388	3								BOLD:AAB5577	1034
GMP#07727	4	BOLD:AAG8850	389	1								BOLD:AAB7915	1035
GMP#07727	4	BOLD:AAG9713	392	5								BOLD:AAB9578	1036
GMP#07727	4	BOLD:AAG9897	393	2								BOLD:AAC1374	1037
GMP#07727	4	BOLD:AAH0135	395	1								BOLD:AAC3354	1038
GMP#07727	4	BOLD:AAH0212	755	3								BOLD:AAC3543	1039
GMP#07727	4	BOLD:AAH0256	143	1								BOLD:AAC4802	1040
GMP#07727	4	BOLD:AAH1692	756	3								BOLD:AAC5326	1041
GMP#07727	4	BOLD:AAH1693	757	1								BOLD:AAC6872	1042
GMP#07727	4	BOLD:AAH1793	758	1								BOLD:AAC7661	1043
GMP#07727	4	BOLD:AAH1886	144	1								BOLD:AAC9245	1044
GMP#07727	4	BOLD:AAH2004	759	1								BOLD:AAD0131	1045
GMP#07727	4	BOLD:AAH2370	760	1								BOLD:AAD1195	1046
GMP#07727	4	BOLD:AAH3504	761	1								BOLD:AAD1485	1047
GMP#07727	4	BOLD:AAH3617	762	2								BOLD:AAD2789	1048
GMP#07727	4	BOLD:AAH3720	763	2								BOLD:AAD3996	1049
GMP#07727	4	BOLD:AAH3741	764	1								BOLD:AAD5254	1050
GMP#07727	4	BOLD:AAH3755	765	5								BOLD:AAD7999	1051
GMP#07727	4	BOLD:AAH3920	147	1								BOLD:AAD8205	1052
GMP#07727	4	BOLD:AAH3947	766	1								BOLD:AAD8276	1053
GMP#07727	4	BOLD:AAH3968	767	2								BOLD:AAE0406	1054
GMP#07727	4	BOLD:AAH3983	768	1								BOLD:AAE5495	1055
GMP#07727	4	BOLD:AAH4013	769	1								BOLD:AAE6722	1056
GMP#07727	4	BOLD:AAH4225	770	2								BOLD:AAE8158	1057
GMP#07727	4	BOLD:AAH4497	771	1								BOLD:AAE9438	1058
GMP#07727	4	BOLD:AAH7068	400	14								BOLD:AAF0889	1059
GMP#07727	4	BOLD:AAH9376	772	4								BOLD:AAF1382	1060
GMP#07727	4	BOLD:AAI0332	773	1								BOLD:AAF4817	1061
GMP#07727	4	BOLD:AAI1549	774	1								BOLD:AAF6577	1062
GMP#07727	4	BOLD:AAI2681	38	1								BOLD:AAF8198	1063
GMP#07727	4	BOLD:AAI2689	775	1								BOLD:AAF9236	1064
GMP#07727	4	BOLD:AAI2721	401	2								BOLD:AAF9317	1065
GMP#07727	4	BOLD:AAI2838	402	1								BOLD:AAF9756	1066
GMP#07727	4	BOLD:AAI3014	152	12								BOLD:AAF9768	1067
GMP#07727	4	BOLD:AAI3015	403	2								BOLD:AAF9771	1068
GMP#07727	4	BOLD:AAI3547	776	1								BOLD:AAF9884	1069
GMP#07727	4	BOLD:AAI5103	777	1								BOLD:AAG1322	1070
GMP#07727	4	BOLD:AAI7960	405	2								BOLD:AAG1345	1071
GMP#07727	4	BOLD:AAI8935	42	2								BOLD:AAG1421	1072
GMP#07727	4	BOLD:AAJ4031	778	2								BOLD:AAG1658	1073
GMP#07727	4	BOLD:AAJ6986	779	1								BOLD:AAG1712	1074
GMP#07727	4	BOLD:AAJ9681	780	1								BOLD:AAG2146	1075
GMP#07727	4	BOLD:AAL0380	781	1								BOLD:AAG2172	1076
GMP#07727	4	BOLD:AAL7329	410	3								BOLD:AAG2355	1077
GMP#07727	4	BOLD:AAL7356	782	7								BOLD:AAG2513	1078
GMP#07727	4	BOLD:AAL7370	783	1								BOLD:AAG2869	1079
GMP#07727	4	BOLD:AAL7525	411	1								BOLD:AAG2878	1080
GMP#07727	4	BOLD:AAL9076	159	10								BOLD:AAG2909	1081
GMP#07727	4	BOLD:AAL9079	413	2								BOLD:AAG3193	1082
GMP#07727	4	BOLD:AAM1947	784	1								BOLD:AAG3203	1083
GMP#07727	4	BOLD:AAM6273	785	1								BOLD:AAG3314	1084
GMP#07727	4	BOLD:AAM6277	415	18								BOLD:AAG3320	1085
GMP#07727	4	BOLD:AAM6286	416	5								BOLD:AAG3343	1086
GMP#07727	4	BOLD:AAM6288	46	2								BOLD:AAG3631	1087
GMP#07727	4	BOLD:AAM6293	161	36								BOLD:AAG3957	1088
GMP#07727	4	BOLD:AAM7333	419	3								BOLD:AAG4741	1089
GMP#07727	4	BOLD:AAM7337	420	5								BOLD:AAG4781	1090
GMP#07727	4	BOLD:AAM7339	786	1								BOLD:AAG4898	1091
GMP#07727	4	BOLD:AAM7401	787	1								BOLD:AAG5468	1092
GMP#07727	4	BOLD:AAM7487	163	2								BOLD:AAG5518	1093
GMP#07727	4	BOLD:AAM7733	788	1								BOLD:AAG5788	1094
GMP#07727	4	BOLD:AAM7740	789	1								BOLD:AAG5792	1095
GMP#07727	4	BOLD:AAM9107	47	2								BOLD:AAG5797	1096
GMP#07727	4	BOLD:AAM9228	425	1								BOLD:AAG6431	1097
GMP#07727	4	BOLD:AAM9242	165	3								BOLD:AAG6519	1098
GMP#07727	4	BOLD:AAM9243	790	1								BOLD:AAG6744	1099
GMP#07727	4	BOLD:AAM9252	426	12								BOLD:AAG6907	1100
GMP#07727	4	BOLD:AAM9347	48	4								BOLD:AAG6954	1101
GMP#07727	4	BOLD:AAN5161	428	7								BOLD:AAG7064	1102
GMP#07727	4	BOLD:AAN5162	429	2								BOLD:AAG7276	1103
GMP#07727	4	BOLD:AAN5193	432	4								BOLD:AAG7634	1104
GMP#07727	4	BOLD:AAN5233	791	1								BOLD:AAG7641	1105
GMP#07727	4	BOLD:AAN5235	792	2								BOLD:AAG7687	1106
GMP#07727	4	BOLD:AAN5249	793	1								BOLD:AAG7713	1107
GMP#07727	4	BOLD:AAN5261	794	1								BOLD:AAG7732	1108
GMP#07727	4	BOLD:AAN5267	434	1								BOLD:AAG7762	1109
GMP#07727	4	BOLD:AAN5269	795	1								BOLD:AAG7963	1110
GMP#07727	4	BOLD:AAN5311	796	1								BOLD:AAG8371	1111
GMP#07727	4	BOLD:AAN5330	168	3								BOLD:AAG8409	1112
GMP#07727	4	BOLD:AAN5332	797	1								BOLD:AAG9197	1113
GMP#07727	4	BOLD:AAN5345	435	7								BOLD:AAG9234	1114
GMP#07727	4	BOLD:AAN5348	170	1								BOLD:AAG9699	1115
GMP#07727	4	BOLD:AAN5352	436	1								BOLD:AAH0019	1116
GMP#07727	4	BOLD:AAN5354	437	1								BOLD:AAH0127	1117
GMP#07727	4	BOLD:AAN5358	50	1								BOLD:AAH1764	1118
GMP#07727	4	BOLD:AAN5369	798	1								BOLD:AAH3516	1119
GMP#07727	4	BOLD:AAN5432	439	1								BOLD:AAH3530	1120
GMP#07727	4	BOLD:AAN6415	799	1								BOLD:AAH3532	1121
GMP#07727	4	BOLD:AAN6430	444	2								BOLD:AAH3664	1122
GMP#07727	4	BOLD:AAN6433	800	3								BOLD:AAH3770	1123
GMP#07727	4	BOLD:AAN6435	446	34								BOLD:AAH3951	1124
GMP#07727	4	BOLD:AAN6445	801	1								BOLD:AAH4210	1125
GMP#07727	4	BOLD:AAN6447	447	2								BOLD:AAH4229	1126
GMP#07727	4	BOLD:AAN6706	802	5								BOLD:AAH4235	1127
GMP#07727	4	BOLD:AAN8770	174	1								BOLD:AAH5592	1128
GMP#07727	4	BOLD:AAN9807	803	2								BOLD:AAH7052	1129
GMP#07727	4	BOLD:AAO0157	804	1								BOLD:AAH7139	1130
GMP#07727	4	BOLD:AAO7716	805	1								BOLD:AAH8507	1131
GMP#07727	4	BOLD:AAO8147	806	1								BOLD:AAI0007	1132
GMP#07727	4	BOLD:AAO8361	177	2								BOLD:AAI3260	1133
GMP#07727	4	BOLD:AAO8579	456	2								BOLD:AAI3360	1134
GMP#07727	4	BOLD:AAP2721	179	1								BOLD:AAI4543	1135
GMP#07727	4	BOLD:AAP2854	807	1								BOLD:AAI4969	1136
GMP#07727	4	BOLD:AAP2855	808	1								BOLD:AAI6141	1137
GMP#07727	4	BOLD:AAP2857	809	1								BOLD:AAI6272	1138
GMP#07727	4	BOLD:AAP2858	810	7								BOLD:AAI7042	1139
GMP#07727	4	BOLD:AAP2907	181	1								BOLD:AAJ0212	1140
GMP#07727	4	BOLD:AAP2967	53	3								BOLD:AAJ0565	1141
GMP#07727	4	BOLD:AAP2970	460	1								BOLD:AAJ7105	1142
GMP#07727	4	BOLD:AAP2973	811	6								BOLD:AAK0114	1143
GMP#07727	4	BOLD:AAP2998	812	6								BOLD:AAK5607	1144
GMP#07727	4	BOLD:AAP3007	461	1								BOLD:AAK6504	1145
GMP#07727	4	BOLD:AAP4733	813	1								BOLD:AAK7242	1146
GMP#07727	4	BOLD:AAP4734	183	3								BOLD:AAK8171	1147
GMP#07727	4	BOLD:AAP5342	464	6								BOLD:AAL0908	1148
GMP#07727	4	BOLD:AAP5870	465	13								BOLD:AAL5084	1149
GMP#07727	4	BOLD:AAP5920	185	10								BOLD:AAL7396	1150
GMP#07727	4	BOLD:AAP6465	466	11								BOLD:AAL8961	1151
GMP#07727	4	BOLD:AAP6689	467	2								BOLD:AAL9138	1152
GMP#07727	4	BOLD:AAP6875	187	2								BOLD:AAM1948	1153
GMP#07727	4	BOLD:AAP6878	814	1								BOLD:AAM6037	1154
GMP#07727	4	BOLD:AAP6882	815	1								BOLD:AAM6039	1155
GMP#07727	4	BOLD:AAP6915	468	4								BOLD:AAM6184	1156
GMP#07727	4	BOLD:AAP6949	816	1								BOLD:AAM6249	1157
GMP#07727	4	BOLD:AAP7035	817	1								BOLD:AAM6270	1158
GMP#07727	4	BOLD:AAP7637	470	16								BOLD:AAM6287	1159
GMP#07727	4	BOLD:AAP7640	818	4								BOLD:AAM7334	1160
GMP#07727	4	BOLD:AAP7841	471	2								BOLD:AAM7996	1161
GMP#07727	4	BOLD:AAP8585	56	2								BOLD:AAM8980	1162
GMP#07727	4	BOLD:AAP8654	190	3								BOLD:AAM9125	1163
GMP#07727	4	BOLD:AAP8724	819	1								BOLD:AAM9365	1164
GMP#07727	4	BOLD:AAP8757	191	5								BOLD:AAM9376	1165
GMP#07727	4	BOLD:AAP8831	472	1								BOLD:AAN5149	1166
GMP#07727	4	BOLD:AAP9022	820	1								BOLD:AAN5151	1167
GMP#07727	4	BOLD:AAQ0583	821	1								BOLD:AAN5155	1168
GMP#07727	4	BOLD:AAQ0599	822	1								BOLD:AAN5158	1169
GMP#07727	4	BOLD:AAQ0606	474	1								BOLD:AAN5200	1170
GMP#07727	4	BOLD:AAQ0634	475	12								BOLD:AAN5221	1171
GMP#07727	4	BOLD:AAQ0640	476	2								BOLD:AAN5229	1172
GMP#07727	4	BOLD:AAQ0642	823	1								BOLD:AAN5250	1173
GMP#07727	4	BOLD:AAQ2937	824	1								BOLD:AAN5259	1174
GMP#07727	4	BOLD:AAU0577	192	1								BOLD:AAN5271	1175
GMP#07727	4	BOLD:AAU4913	825	1								BOLD:AAN5336	1176
GMP#07727	4	BOLD:AAU6513	481	6								BOLD:AAN5343	1177
GMP#07727	4	BOLD:AAU6535	482	3								BOLD:AAN5344	1178
GMP#07727	4	BOLD:AAU6600	483	1								BOLD:AAN5351	1179
GMP#07727	4	BOLD:AAU6603	484	1								BOLD:AAN5383	1180
GMP#07727	4	BOLD:AAU6614	826	10								BOLD:AAN5441	1181
GMP#07727	4	BOLD:AAU6618	827	4								BOLD:AAN5497	1182
GMP#07727	4	BOLD:AAU6620	828	1								BOLD:AAN5500	1183
GMP#07727	4	BOLD:AAU6624	58	1								BOLD:AAN5503	1184
GMP#07727	4	BOLD:AAU6626	829	1								BOLD:AAN5505	1185
GMP#07727	4	BOLD:AAU6629	830	1								BOLD:AAN6235	1186
GMP#07727	4	BOLD:AAU6966	831	2								BOLD:AAN6429	1187
GMP#07727	4	BOLD:AAU6970	59	1								BOLD:AAN6437	1188
GMP#07727	4	BOLD:AAU7678	490	2								BOLD:AAN6440	1189
GMP#07727	4	BOLD:AAU8203	492	8								BOLD:AAN6614	1190
GMP#07727	4	BOLD:AAU8342	832	3								BOLD:AAN6770	1191
GMP#07727	4	BOLD:AAU8358	198	2								BOLD:AAN7559	1192
GMP#07727	4	BOLD:AAU8365	833	3								BOLD:AAN7591	1193
GMP#07727	4	BOLD:AAU8372	834	1								BOLD:AAN7641	1194
GMP#07727	4	BOLD:AAU8376	835	1								BOLD:AAN8138	1195
GMP#07727	4	BOLD:AAU8384	836	1								BOLD:AAN8172	1196
GMP#07727	4	BOLD:AAU8389	837	1								BOLD:AAN8250	1197
GMP#07727	4	BOLD:AAU8399	200	4								BOLD:AAN8263	1198
GMP#07727	4	BOLD:AAU8441	838	1								BOLD:AAN8337	1199
GMP#07727	4	BOLD:AAU8455	494	16								BOLD:AAN8633	1200
GMP#07727	4	BOLD:AAU8485	839	2								BOLD:AAN8687	1201
GMP#07727	4	BOLD:AAU8680	840	1								BOLD:AAN8692	1202
GMP#07727	4	BOLD:AAU8749	841	1								BOLD:AAN8705	1203
GMP#07727	4	BOLD:AAU9339	842	1								BOLD:AAN8711	1204
GMP#07727	4	BOLD:AAV0157	203	2								BOLD:AAN9209	1205
GMP#07727	4	BOLD:AAV0158	498	1								BOLD:AAO7623	1206
GMP#07727	4	BOLD:AAV0161	204	3								BOLD:AAO7630	1207
GMP#07727	4	BOLD:AAV0903	843	1								BOLD:AAP1210	1208
GMP#07727	4	BOLD:AAV1302	844	1								BOLD:AAP1834	1209
GMP#07727	4	BOLD:AAV4836	505	1								BOLD:AAP2487	1210
GMP#07727	4	BOLD:AAV5088	845	1								BOLD:AAP2528	1211
GMP#07727	4	BOLD:AAV5144	507	1								BOLD:AAP4581	1212
GMP#07727	4	BOLD:AAV5793	846	2								BOLD:AAP4828	1213
GMP#07727	4	BOLD:AAV5942	847	1								BOLD:AAP5113	1214
GMP#07727	4	BOLD:AAV6213	511	7								BOLD:AAP6322	1215
GMP#07727	4	BOLD:AAY6412	207	3								BOLD:AAP6354	1216
GMP#07727	4	BOLD:AAY6456	848	1								BOLD:AAP6357	1217
GMP#07727	4	BOLD:AAY6464	849	1								BOLD:AAP6420	1218
GMP#07727	4	BOLD:AAY6734	850	2								BOLD:AAP6466	1219
GMP#07727	4	BOLD:AAY6736	851	2								BOLD:AAP6693	1220
GMP#07727	4	BOLD:AAY6738	209	9								BOLD:AAP8069	1221
GMP#07727	4	BOLD:AAY6742	514	1								BOLD:AAP8071	1222
GMP#07727	4	BOLD:AAY9207	852	1								BOLD:AAP8784	1223
GMP#07727	4	BOLD:AAY9211	516	1								BOLD:AAP8833	1224
GMP#07727	4	BOLD:AAY9807	853	2								BOLD:AAP8895	1225
GMP#07727	4	BOLD:AAZ0144	854	1								BOLD:AAP8989	1226
GMP#07727	4	BOLD:AAZ0238	855	1								BOLD:AAP8999	1227
GMP#07727	4	BOLD:AAZ5511	856	1								BOLD:AAQ0265	1228
GMP#07727	4	BOLD:AAZ5599	857	1								BOLD:AAQ0299	1229
GMP#07727	4	BOLD:AAZ5626	858	3								BOLD:AAQ0594	1230
GMP#07727	4	BOLD:AAZ5700	859	1								BOLD:AAQ0601	1231
GMP#07727	4	BOLD:AAZ8146	860	1								BOLD:AAQ0692	1232
GMP#07727	4	BOLD:AAZ8495	214	1								BOLD:AAQ0818	1233
GMP#07727	4	BOLD:ABA0771	519	5								BOLD:AAQ0819	1234
GMP#07727	4	BOLD:ABA0844	861	5								BOLD:AAQ2523	1235
GMP#07727	4	BOLD:ABA0863	862	1								BOLD:AAQ2556	1236
GMP#07727	4	BOLD:ABA1217	218	6								BOLD:AAQ2559	1237
GMP#07727	4	BOLD:ABA1225	65	1								BOLD:AAQ2892	1238
GMP#07727	4	BOLD:ABA3960	222	2								BOLD:AAU4506	1239
GMP#07727	4	BOLD:ABA5771	223	7								BOLD:AAU4830	1240
GMP#07727	4	BOLD:ABA5772	224	2								BOLD:AAU4881	1241
GMP#07727	4	BOLD:ABA5798	226	2								BOLD:AAU5599	1242
GMP#07727	4	BOLD:ABA5830	228	1								BOLD:AAU6510	1243
GMP#07727	4	BOLD:ABA5864	229	1								BOLD:AAU6526	1244
GMP#07727	4	BOLD:ABA5930	863	2								BOLD:AAU6533	1245
GMP#07727	4	BOLD:ABA5944	864	1								BOLD:AAU6540	1246
GMP#07727	4	BOLD:ABA6297	865	1								BOLD:AAU6544	1247
GMP#07727	4	BOLD:ABA6311	529	1								BOLD:AAU6592	1248
GMP#07727	4	BOLD:ABA6320	530	4								BOLD:AAU6594	1249
GMP#07727	4	BOLD:ABA6335	67	1								BOLD:AAU6595	1250
GMP#07727	4	BOLD:ABA6440	866	3								BOLD:AAU6609	1251
GMP#07727	4	BOLD:ABA6448	867	1								BOLD:AAU6622	1252
GMP#07727	4	BOLD:ABA6478	868	1								BOLD:AAU6627	1253
GMP#07727	4	BOLD:ABA6501	532	3								BOLD:AAU7330	1254
GMP#07727	4	BOLD:ABA8048	869	2								BOLD:AAU8210	1255
GMP#07727	4	BOLD:ABA9093	870	2								BOLD:AAU8212	1256
GMP#07727	4	BOLD:ABU5520	232	48								BOLD:AAU8223	1257
GMP#07727	4	BOLD:ABU5526	70	7								BOLD:AAU8228	1258
GMP#07727	4	BOLD:ABU5533	535	4								BOLD:AAU8327	1259
GMP#07727	4	BOLD:ABU9891	234	1								BOLD:AAU8348	1260
GMP#07727	4	BOLD:ABV0480	537	1								BOLD:AAU8361	1261
GMP#07727	4	BOLD:ABV1222	871	1								BOLD:AAU8490	1262
GMP#07727	4	BOLD:ABV1241	235	3								BOLD:AAU8534	1263
GMP#07727	4	BOLD:ABV1243	872	1								BOLD:AAU8583	1264
GMP#07727	4	BOLD:ABV1265	873	1								BOLD:AAU8619	1265
GMP#07727	4	BOLD:ABV1314	237	2								BOLD:AAU8646	1266
GMP#07727	4	BOLD:ABV1337	874	1								BOLD:AAU8702	1267
GMP#07727	4	BOLD:ABV1354	875	1								BOLD:AAU8736	1268
GMP#07727	4	BOLD:ABV1379	876	3								BOLD:AAU8802	1269
GMP#07727	4	BOLD:ABV1443	539	1								BOLD:AAU8895	1270
GMP#07727	4	BOLD:ABV1455	877	3								BOLD:AAU8999	1271
GMP#07727	4	BOLD:ABV2644	878	1								BOLD:AAU9045	1272
GMP#07727	4	BOLD:ABV3010	879	6								BOLD:AAV0836	1273
GMP#07727	4	BOLD:ABV9019	880	1								BOLD:AAV3042	1274
GMP#07727	4	BOLD:ABV9277	881	3								BOLD:AAV3887	1275
GMP#07727	4	BOLD:ABV9306	239	6								BOLD:AAV4861	1276
GMP#07727	4	BOLD:ABV9378	882	1								BOLD:AAV4975	1277
GMP#07727	4	BOLD:ABW0442	883	1								BOLD:AAV5157	1278
GMP#07727	4	BOLD:ABW1307	240	1								BOLD:AAV5177	1279
GMP#07727	4	BOLD:ABW1309	884	1								BOLD:AAV5319	1280
GMP#07727	4	BOLD:ABW1310	73	4								BOLD:AAV5322	1281
GMP#07727	4	BOLD:ABW1321	885	1								BOLD:AAV5323	1282
GMP#07727	4	BOLD:ABW1518	886	1								BOLD:AAV5329	1283
GMP#07727	4	BOLD:ABW2834	543	1								BOLD:AAV5355	1284
GMP#07727	4	BOLD:ABW3187	887	1								BOLD:AAV5552	1285
GMP#07727	4	BOLD:ABW3231	545	1								BOLD:AAV5562	1286
GMP#07727	4	BOLD:ABW3282	888	1								BOLD:AAV5762	1287
GMP#07727	4	BOLD:ABW3307	889	1								BOLD:AAV5790	1288
GMP#07727	4	BOLD:ABW5502	242	1								BOLD:AAV5796	1289
GMP#07727	4	BOLD:ABW5540	546	6								BOLD:AAW6380	1290
GMP#07727	4	BOLD:ABW5634	243	1								BOLD:AAY1337	1291
GMP#07727	4	BOLD:ABW7321	890	1								BOLD:AAY6407	1292
GMP#07727	4	BOLD:ABW7322	547	28								BOLD:AAY6445	1293
GMP#07727	4	BOLD:ABW7654	244	1								BOLD:AAY6450	1294
GMP#07727	4	BOLD:ABW8040	891	1								BOLD:AAY6541	1295
GMP#07727	4	BOLD:ABW8065	892	1								BOLD:AAY6678	1296
GMP#07727	4	BOLD:ABX5561	893	1								BOLD:AAY6741	1297
GMP#07727	4	BOLD:ABX5713	246	1								BOLD:AAY9905	1298
GMP#07727	4	BOLD:ABX8236	552	2								BOLD:AAZ0173	1299
GMP#07727	4	BOLD:ABX8472	894	1								BOLD:AAZ0294	1300
GMP#07727	4	BOLD:ABX8601	895	1								BOLD:AAZ1968	1301
GMP#07727	4	BOLD:ABX9019	248	1								BOLD:AAZ2180	1302
GMP#07727	4	BOLD:ABY2035	896	2								BOLD:AAZ3931	1303
GMP#07727	4	BOLD:ABY3407	556	1								BOLD:AAZ4865	1304
GMP#07727	4	BOLD:ABY6869	558	4								BOLD:AAZ6708	1305
GMP#07727	4	BOLD:ABY8575	560	3								BOLD:AAZ8500	1306
GMP#07727	4	BOLD:ABY9046	897	1								BOLD:AAZ8501	1307
GMP#07727	4	BOLD:ABZ1036	898	1								BOLD:ABA0579	1308
GMP#07727	4	BOLD:ABZ1975	899	1								BOLD:ABA0818	1309
GMP#07727	4	BOLD:ABZ2493	254	4								BOLD:ABA5875	1310
GMP#07727	4	BOLD:ABZ2516	900	1								BOLD:ABA5910	1311
GMP#07727	4	BOLD:ABZ3625	901	1								BOLD:ABA5942	1312
GMP#07727	4	BOLD:ABZ6353	902	50								BOLD:ABA5950	1313
GMP#07727	4	BOLD:ABZ7151	903	1								BOLD:ABA6056	1314
GMP#07727	4	BOLD:ACA1234	904	1								BOLD:ABA6127	1315
GMP#07727	4	BOLD:ACA2954	566	1								BOLD:ABA6131	1316
GMP#07727	4	BOLD:ACA3426	905	2								BOLD:ABA6171	1317
GMP#07727	4	BOLD:ACA3626	569	1								BOLD:ABA6331	1318
GMP#07727	4	BOLD:ACA4089	570	3								BOLD:ABA6489	1319
GMP#07727	4	BOLD:ACA4847	906	1								BOLD:ABA7852	1320
GMP#07727	4	BOLD:ACA8239	574	2								BOLD:ABA9083	1321
GMP#07727	4	BOLD:ACA8801	907	1								BOLD:ABA9094	1322
GMP#07727	4	BOLD:ACA8939	575	1								BOLD:ABA9101	1323
GMP#07727	4	BOLD:ACA9051	908	2								BOLD:ABA9839	1324
GMP#07727	4	BOLD:ACA9545	576	6								BOLD:ABU5521	1325
GMP#07727	4	BOLD:ACB1266	909	5								BOLD:ABU5529	1326
GMP#07727	4	BOLD:ACB3271	910	1								BOLD:ABU5535	1327
GMP#07727	4	BOLD:ACB9392	911	1								BOLD:ABU8852	1328
GMP#07727	4	BOLD:ACB9399	579	1								BOLD:ABV0266	1329
GMP#07727	4	BOLD:ACB9959	912	1								BOLD:ABV0388	1330
GMP#07727	4	BOLD:ACC0651	80	35								BOLD:ABV0473	1331
GMP#07727	4	BOLD:ACC1283	580	1								BOLD:ABV0493	1332
GMP#07727	4	BOLD:ACC1288	913	4								BOLD:ABV1206	1333
GMP#07727	4	BOLD:ACC7921	914	2								BOLD:ABV1232	1334
GMP#07727	4	BOLD:ACC8799	915	1								BOLD:ABV1292	1335
GMP#07727	4	BOLD:ACD0718	586	4								BOLD:ABV1330	1336
GMP#07727	4	BOLD:ACD1218	916	3								BOLD:ABV1420	1337
GMP#07727	4	BOLD:ACD3877	266	1								BOLD:ABV1487	1338
GMP#07727	4	BOLD:ACD9424	917	1								BOLD:ABV1529	1339
GMP#07727	4	BOLD:ACE0699	588	1								BOLD:ABV1657	1340
GMP#07727	4	BOLD:ACE3123	589	2								BOLD:ABV2812	1341
GMP#07727	4	BOLD:ACE3609	918	1								BOLD:ABV9379	1342
GMP#07727	4	BOLD:ACE4814	919	1								BOLD:ABW1189	1343
GMP#07727	4	BOLD:ACE5102	270	1								BOLD:ABW2407	1344
GMP#07727	4	BOLD:ACE5263	920	1								BOLD:ABW2631	1345
GMP#07727	4	BOLD:ACE5640	921	2								BOLD:ABW3169	1346
GMP#07727	4	BOLD:ACE7452	922	1								BOLD:ABW5461	1347
GMP#07727	4	BOLD:ACE7580	923	2								BOLD:ABW6100	1348
GMP#07727	4	BOLD:ACE9045	924	1								BOLD:ABW7767	1349
GMP#07727	4	BOLD:ACE9710	590	1								BOLD:ABW8018	1350
GMP#07727	4	BOLD:ACF2457	272	4								BOLD:ABX0017	1351
GMP#07727	4	BOLD:ACF2821	273	11								BOLD:ABX5395	1352
GMP#07727	4	BOLD:ACF4734	593	2								BOLD:ABX6290	1353
GMP#07727	4	BOLD:ACF6671	925	1								BOLD:ABX6610	1354
GMP#07727	4	BOLD:ACF7512	926	1								BOLD:ABX7420	1355
GMP#07727	4	BOLD:ACF8096	277	1								BOLD:ABX7483	1356
GMP#07727	4	BOLD:ACF9074	281	2								BOLD:ABX8463	1357
GMP#07727	4	BOLD:ACF9268	282	1								BOLD:ABX9178	1358
GMP#07727	4	BOLD:ACF9546	927	1								BOLD:ABY0682	1359
GMP#07727	4	BOLD:ACF9756	928	3								BOLD:ABY0945	1360
GMP#07727	4	BOLD:ACG2115	929	7								BOLD:ABY1773	1361
GMP#07727	4	BOLD:ACG3753	930	1								BOLD:ABY1910	1362
GMP#07727	4	BOLD:ACG4079	931	4								BOLD:ABY8137	1363
GMP#07727	4	BOLD:ACG4118	932	1								BOLD:ABY8401	1364
GMP#07727	4	BOLD:ACG4218	933	1								BOLD:ABY9574	1365
GMP#07727	4	BOLD:ACG6639	934	5								BOLD:ABY9689	1366
GMP#07727	4	BOLD:ACH2330	935	1								BOLD:ABY9755	1367
GMP#07727	4	BOLD:ACH4162	601	2								BOLD:ABZ2507	1368
GMP#07727	4	BOLD:ACI3514	936	1								BOLD:ABZ3751	1369
GMP#07727	4	BOLD:ACI3882	937	1								BOLD:ABZ4247	1370
GMP#07727	4	BOLD:ACI5353	603	8								BOLD:ABZ6180	1371
GMP#07727	4	BOLD:ACI5517	285	2								BOLD:ABZ8281	1372
GMP#07727	4	BOLD:ACJ0017	938	1								BOLD:ACA3113	1373
GMP#07727	4	BOLD:ACJ0844	939	3								BOLD:ACA3849	1374
GMP#07727	4	BOLD:ACJ3516	940	1								BOLD:ACA4406	1375
GMP#07727	4	BOLD:ACJ3722	608	8								BOLD:ACA4717	1376
GMP#07727	4	BOLD:ACJ5130	941	2								BOLD:ACA4778	1377
GMP#07727	4	BOLD:ACJ5224	942	1								BOLD:ACA4863	1378
GMP#07727	4	BOLD:ACJ6984	943	1								BOLD:ACA4900	1379
GMP#07727	4	BOLD:ACJ7008	944	2								BOLD:ACA4980	1380
GMP#07727	4	BOLD:ACJ8377	612	1								BOLD:ACA5153	1381
GMP#07727	4	BOLD:ACJ8807	945	1								BOLD:ACA5246	1382
GMP#07727	4	BOLD:ACJ9045	946	1								BOLD:ACA5842	1383
GMP#07727	4	BOLD:ACJ9109	947	1								BOLD:ACA6021	1384
GMP#07727	4	BOLD:ACK1586	948	1								BOLD:ACA6461	1385
GMP#07727	4	BOLD:ACK1679	949	1								BOLD:ACA6463	1386
GMP#07727	4	BOLD:ACK1847	290	1								BOLD:ACA7284	1387
GMP#07727	4	BOLD:ACK2715	950	1								BOLD:ACA7378	1388
GMP#07727	4	BOLD:ACK2907	951	1								BOLD:ACA7685	1389
GMP#07727	4	BOLD:ACK5235	952	1								BOLD:ACA7945	1390
GMP#07727	4	BOLD:ACK5386	953	2								BOLD:ACA8582	1391
GMP#07727	4	BOLD:ACK7034	954	1								BOLD:ACB1682	1392
GMP#07727	4	BOLD:ACK7314	955	16								BOLD:ACB2589	1393
GMP#07727	4	BOLD:ACL0119	618	2								BOLD:ACB3267	1394
GMP#07727	4	BOLD:ACL0470	956	1								BOLD:ACC2619	1395
GMP#07727	4	BOLD:ACL0478	957	1								BOLD:ACC3892	1396
GMP#07727	4	BOLD:ACL2194	620	1								BOLD:ACC5656	1397
GMP#07727	4	BOLD:ACL5173	958	1								BOLD:ACC7243	1398
GMP#07727	4	BOLD:ACL6802	626	11								BOLD:ACC7540	1399
GMP#07727	4	BOLD:ACL7003	959	1								BOLD:ACC7553	1400
GMP#07727	4	BOLD:ACL8091	960	1								BOLD:ACC7559	1401
GMP#07727	4	BOLD:ACL8125	961	1								BOLD:ACC8120	1402
GMP#07727	4	BOLD:ACM1165	629	1								BOLD:ACC8231	1403
GMP#07727	4	BOLD:ACM1395	630	21								BOLD:ACC8275	1404
GMP#07727	4	BOLD:ACM1549	631	26								BOLD:ACC8322	1405
GMP#07727	4	BOLD:ACM1798	962	1								BOLD:ACC8572	1406
GMP#07727	4	BOLD:ACM1999	633	2								BOLD:ACD0889	1407
GMP#07727	4	BOLD:ACM2009	90	2								BOLD:ACD3278	1408
GMP#07727	4	BOLD:ACM2015	963	1								BOLD:ACD8848	1409
GMP#07727	4	BOLD:ACM2497	299	1								BOLD:ACD9088	1410
GMP#07727	4	BOLD:ACM2941	964	1								BOLD:ACE2606	1411
GMP#07727	4	BOLD:ACM3263	965	1								BOLD:ACE3185	1412
GMP#07727	4	BOLD:ACM6155	966	1								BOLD:ACE4233	1413
GMP#07727	4	BOLD:ACM8656	967	9								BOLD:ACE5281	1414
GMP#07727	4	BOLD:ACN2444	637	6								BOLD:ACE5974	1415
GMP#07727	4	BOLD:ACN5657	638	1								BOLD:ACE7625	1416
GMP#07727	4	BOLD:ACO6056	968	1								BOLD:ACE8375	1417
GMP#07727	4	BOLD:ACO8570	969	1								BOLD:ACE8616	1418
GMP#07727	4	BOLD:ACP3071	970	1								BOLD:ACE9773	1419
GMP#07727	4	BOLD:ACP4736	91	3								BOLD:ACF0076	1420
GMP#07727	4	BOLD:ACP7395	971	1								BOLD:ACF0947	1421
GMP#07727	4	BOLD:ACP9550	972	1								BOLD:ACF1129	1422
GMP#07727	4	BOLD:ACQ2060	640	2								BOLD:ACF3694	1423
GMP#07727	4	BOLD:ACQ3943	304	1								BOLD:ACF4348	1424
GMP#07727	4	BOLD:ACR1960	973	2								BOLD:ACF4988	1425
GMP#07727	4	BOLD:ACR6101	645	2								BOLD:ACF5025	1426
GMP#07727	4	BOLD:ACR6131	974	1								BOLD:ACF5026	1427
GMP#07727	4	BOLD:ACR8658	975	1								BOLD:ACF5282	1428
GMP#07727	4	BOLD:ACS9433	976	1								BOLD:ACF6749	1429
GMP#07727	4	BOLD:ACT0257	977	2								BOLD:ACF7688	1430
GMP#07727	4	BOLD:ACT6224	978	1								BOLD:ACF7754	1431
GMP#07727	4	BOLD:ACU2906	648	1								BOLD:ACF8609	1432
GMP#07727	4	BOLD:ACU5376	979	1								BOLD:ACF8754	1433
GMP#07727	4	BOLD:ACU7906	309	2								BOLD:ACG2927	1434
GMP#07727	4	BOLD:ACV1788	980	1								BOLD:ACG2990	1435
GMP#07727	4	BOLD:ACV1904	981	1								BOLD:ACG3394	1436
GMP#07727	4	BOLD:ACV1942	652	1								BOLD:ACG3539	1437
GMP#07727	4	BOLD:ACV2090	982	1								BOLD:ACG3798	1438
GMP#07727	4	BOLD:ACV2155	983	1								BOLD:ACG4727	1439
GMP#07727	4	BOLD:ACV2297	984	1								BOLD:ACG5789	1440
GMP#07727	4	BOLD:ACV2298	985	2								BOLD:ACG5827	1441
GMP#07727	4	BOLD:ACV2330	986	1								BOLD:ACG6284	1442
GMP#07727	4	BOLD:ACV2335	311	1								BOLD:ACG8695	1443
GMP#07727	4	BOLD:ACV2372	987	1								BOLD:ACG9322	1444
GMP#07727	4	BOLD:ACV2386	988	1								BOLD:ACH0608	1445
GMP#07727	4	BOLD:ACV2603	989	2								BOLD:ACH3803	1446
GMP#07727	4	BOLD:ACV2795	990	2								BOLD:ACH3809	1447
GMP#07727	4	BOLD:ACV2942	991	1								BOLD:ACH4393	1448
GMP#07727	4	BOLD:ACV2997	992	1								BOLD:ACI4153	1449
GMP#07727	4	BOLD:ACV3023	656	5								BOLD:ACI7165	1450
GMP#07727	4	BOLD:ACV3072	657	1								BOLD:ACI7166	1451
GMP#07727	4	BOLD:ACV3190	993	1								BOLD:ACI7237	1452
GMP#07727	4	BOLD:ACV3286	994	1								BOLD:ACI7354	1453
GMP#07727	4	BOLD:ACV3306	660	7								BOLD:ACI7472	1454
GMP#07727	4	BOLD:ACV3335	995	1								BOLD:ACI7729	1455
GMP#07727	4	BOLD:ACV3407	996	1								BOLD:ACI8549	1456
GMP#07727	4	BOLD:ACV3571	997	4								BOLD:ACI9776	1457
GMP#07727	4	BOLD:ACV3622	664	6								BOLD:ACJ1971	1458
GMP#07727	4	BOLD:ACV3706	998	1								BOLD:ACJ7454	1459
GMP#07727	4	BOLD:ACV3828	999	1								BOLD:ACJ8520	1460
GMP#07727	4	BOLD:ACV3899	1000	1								BOLD:ACK0161	1461
GMP#07727	4	BOLD:ACV3990	1001	1								BOLD:ACK1238	1462
GMP#07727	4	BOLD:ACV3991	1002	1								BOLD:ACK1458	1463
GMP#07727	4	BOLD:ACV4024	1003	1								BOLD:ACK1565	1464
GMP#07727	4	BOLD:ACV4035	1004	1								BOLD:ACK1571	1465
GMP#07727	4	BOLD:ACV4116	1005	1								BOLD:ACK1835	1466
GMP#07727	4	BOLD:ACV4140	1006	2								BOLD:ACK2140	1467
GMP#07727	4	BOLD:ACV4250	1007	2								BOLD:ACK2185	1468
GMP#07727	4	BOLD:ACV4280	1008	1								BOLD:ACK2599	1469
GMP#07727	4	BOLD:ACV4527	1009	2								BOLD:ACK2828	1470
GMP#07727	4	BOLD:ACV4544	1010	1								BOLD:ACK3431	1471
GMP#07727	4	BOLD:ACV4577	1011	1								BOLD:ACK3535	1472
GMP#07727	4	BOLD:ACV4844	686	2								BOLD:ACK4095	1473
GMP#07727	4	BOLD:ACV5074	687	1								BOLD:ACK5301	1474
GMP#07727	4	BOLD:ACV5201	688	1								BOLD:ACK5466	1475
GMP#07727	4	BOLD:ACV5348	1012	4								BOLD:ACK7254	1476
GMP#07727	4	BOLD:ACV5403	1013	3								BOLD:ACK7315	1477
GMP#07727	4	BOLD:ACV5478	691	1								BOLD:ACK8692	1478
GMP#07727	4	BOLD:ACV5952	1014	1								BOLD:ACL3186	1479
GMP#07727	4	BOLD:ACW2022	1015	1								BOLD:ACL3877	1480
GMP#07728	5	BOLD:AAA1517	1016	1								BOLD:ACL4257	1481
GMP#07728	5	BOLD:AAA2052	318	2								BOLD:ACL4997	1482
GMP#07728	5	BOLD:AAA2254	1017	1								BOLD:ACL6616	1483
GMP#07728	5	BOLD:AAA2368	319	3								BOLD:ACL6620	1484
GMP#07728	5	BOLD:AAA3453	1	1								BOLD:ACL6671	1485
GMP#07728	5	BOLD:AAA3782	1018	1								BOLD:ACL7279	1486
GMP#07728	5	BOLD:AAA3817	697	4								BOLD:ACL7927	1487
GMP#07728	5	BOLD:AAA3933	1019	1								BOLD:ACL8023	1488
GMP#07728	5	BOLD:AAA4097	1020	1								BOLD:ACL8441	1489
GMP#07728	5	BOLD:AAA4119	322	1								BOLD:ACL9152	1490
GMP#07728	5	BOLD:AAA4121	2	1								BOLD:ACM0003	1491
GMP#07728	5	BOLD:AAA4128	3	2								BOLD:ACM0192	1492
GMP#07728	5	BOLD:AAA4130	698	4								BOLD:ACM2222	1493
GMP#07728	5	BOLD:AAA4277	1021	2								BOLD:ACM2973	1494
GMP#07728	5	BOLD:AAA4781	1022	1								BOLD:ACM6249	1495
GMP#07728	5	BOLD:AAA4782	1023	1								BOLD:ACM8243	1496
GMP#07728	5	BOLD:AAA5522	1024	1								BOLD:ACN1655	1497
GMP#07728	5	BOLD:AAA6652	1025	1								BOLD:ACN9868	1498
GMP#07728	5	BOLD:AAA6926	700	6								BOLD:ACO3992	1499
GMP#07728	5	BOLD:AAA7249	5	1								BOLD:ACO5382	1500
GMP#07728	5	BOLD:AAA7272	701	1								BOLD:ACO8914	1501
GMP#07728	5	BOLD:AAA7374	96	5								BOLD:ACP6694	1502
GMP#07728	5	BOLD:AAA7636	1026	1								BOLD:ACP7541	1503
GMP#07728	5	BOLD:AAA7661	325	1								BOLD:ACP9644	1504
GMP#07728	5	BOLD:AAA7667	6	24								BOLD:ACQ6228	1505
GMP#07728	5	BOLD:AAA7886	326	4								BOLD:ACR3975	1506
GMP#07728	5	BOLD:AAA8046	1027	1								BOLD:ACR4067	1507
GMP#07728	5	BOLD:AAA8109	702	2								BOLD:ACT3394	1508
GMP#07728	5	BOLD:AAA9386	703	5								BOLD:ACU1761	1509
GMP#07728	5	BOLD:AAA9422	1028	1								BOLD:ACU3950	1510
GMP#07728	5	BOLD:AAA9461	99	3								BOLD:ACU4327	1511
GMP#07728	5	BOLD:AAA9506	1029	1								BOLD:ACU4456	1512
GMP#07728	5	BOLD:AAB0520	1030	1								BOLD:ACU5009	1513
GMP#07728	5	BOLD:AAB0863	8	1								BOLD:ACU5909	1514
GMP#07728	5	BOLD:AAB1098	327	1								BOLD:ACU7230	1515
GMP#07728	5	BOLD:AAB1188	1031	1								BOLD:ACU8028	1516
GMP#07728	5	BOLD:AAB2384	100	4								BOLD:ACV1908	1517
GMP#07728	5	BOLD:AAB2744	1032	1								BOLD:ACV2105	1518
GMP#07728	5	BOLD:AAB2866	329	10								BOLD:ACV2188	1519
GMP#07728	5	BOLD:AAB4181	1033	1								BOLD:ACV2257	1520
GMP#07728	5	BOLD:AAB5577	1034	1								BOLD:ACV2273	1521
GMP#07728	5	BOLD:AAB7030	331	4								BOLD:ACV2366	1522
GMP#07728	5	BOLD:AAB7915	1035	1								BOLD:ACV2493	1523
GMP#07728	5	BOLD:AAB9578	1036	1								BOLD:ACV2861	1524
GMP#07728	5	BOLD:AAC0706	337	40								BOLD:ACV2911	1525
GMP#07728	5	BOLD:AAC1312	338	7								BOLD:ACV3021	1526
GMP#07728	5	BOLD:AAC1374	1037	1								BOLD:ACV3079	1527
GMP#07728	5	BOLD:AAC3354	1038	1								BOLD:ACV3083	1528
GMP#07728	5	BOLD:AAC3543	1039	4								BOLD:ACV3169	1529
GMP#07728	5	BOLD:AAC4197	104	5								BOLD:ACV3172	1530
GMP#07728	5	BOLD:AAC4525	340	3								BOLD:ACV3224	1531
GMP#07728	5	BOLD:AAC4802	1040	1								BOLD:ACV3260	1532
GMP#07728	5	BOLD:AAC5326	1041	2								BOLD:ACV3460	1533
GMP#07728	5	BOLD:AAC6630	711	1								BOLD:ACV3482	1534
GMP#07728	5	BOLD:AAC6872	1042	1								BOLD:ACV3546	1535
GMP#07728	5	BOLD:AAC7661	1043	2								BOLD:ACV3572	1536
GMP#07728	5	BOLD:AAC8567	341	3								BOLD:ACV3619	1537
GMP#07728	5	BOLD:AAC9245	1044	1								BOLD:ACV3625	1538
GMP#07728	5	BOLD:AAD0131	1045	1								BOLD:ACV3777	1539
GMP#07728	5	BOLD:AAD0300	108	1								BOLD:ACV3783	1540
GMP#07728	5	BOLD:AAD1195	1046	1								BOLD:ACV3873	1541
GMP#07728	5	BOLD:AAD1395	344	5								BOLD:ACV3909	1542
GMP#07728	5	BOLD:AAD1485	1047	2								BOLD:ACV3932	1543
GMP#07728	5	BOLD:AAD2144	347	1								BOLD:ACV4127	1544
GMP#07728	5	BOLD:AAD2789	1048	2								BOLD:ACV4134	1545
GMP#07728	5	BOLD:AAD3996	1049	1								BOLD:ACV4196	1546
GMP#07728	5	BOLD:AAD5194	714	8								BOLD:ACV4199	1547
GMP#07728	5	BOLD:AAD5253	20	2								BOLD:ACV4210	1548
GMP#07728	5	BOLD:AAD5254	1050	2								BOLD:ACV4251	1549
GMP#07728	5	BOLD:AAD5417	110	1								BOLD:ACV4276	1550
GMP#07728	5	BOLD:AAD5593	351	3								BOLD:ACV4277	1551
GMP#07728	5	BOLD:AAD7999	1051	1								BOLD:ACV4324	1552
GMP#07728	5	BOLD:AAD8205	1052	1								BOLD:ACV4326	1553
GMP#07728	5	BOLD:AAD8276	1053	1								BOLD:ACV4374	1554
GMP#07728	5	BOLD:AAE0242	353	22								BOLD:ACV4404	1555
GMP#07728	5	BOLD:AAE0406	1054	1								BOLD:ACV4447	1556
GMP#07728	5	BOLD:AAE3675	115	2								BOLD:ACV4450	1557
GMP#07728	5	BOLD:AAE4298	21	1								BOLD:ACV4457	1558
GMP#07728	5	BOLD:AAE5495	1055	1								BOLD:ACV4507	1559
GMP#07728	5	BOLD:AAE6722	1056	5								BOLD:ACV4508	1560
GMP#07728	5	BOLD:AAE7388	719	1								BOLD:ACV4538	1561
GMP#07728	5	BOLD:AAE8158	1057	1								BOLD:ACV4557	1562
GMP#07728	5	BOLD:AAE9438	1058	2								BOLD:ACV4572	1563
GMP#07728	5	BOLD:AAE9937	720	2								BOLD:ACV4624	1564
GMP#07728	5	BOLD:AAF0889	1059	1								BOLD:ACV4682	1565
GMP#07728	5	BOLD:AAF1382	1060	2								BOLD:ACV4726	1566
GMP#07728	5	BOLD:AAF4394	723	1								BOLD:ACV4801	1567
GMP#07728	5	BOLD:AAF4817	1061	2								BOLD:ACV4826	1568
GMP#07728	5	BOLD:AAF6259	358	1								BOLD:ACV5036	1569
GMP#07728	5	BOLD:AAF6577	1062	1								BOLD:ACV5125	1570
GMP#07728	5	BOLD:AAF7088	359	1								BOLD:ACV5159	1571
GMP#07728	5	BOLD:AAF8198	1063	1								BOLD:ACV5228	1572
GMP#07728	5	BOLD:AAF9236	1064	1								BOLD:ACV5276	1573
GMP#07728	5	BOLD:AAF9285	725	2								BOLD:ACV5279	1574
GMP#07728	5	BOLD:AAF9314	119	7								BOLD:ACV5392	1575
GMP#07728	5	BOLD:AAF9317	1065	1								BOLD:ACV5454	1576
GMP#07728	5	BOLD:AAF9756	1066	3								BOLD:ACV5536	1577
GMP#07728	5	BOLD:AAF9768	1067	1								BOLD:ACV5558	1578
GMP#07728	5	BOLD:AAF9771	1068	2								BOLD:ACV5604	1579
GMP#07728	5	BOLD:AAF9772	727	39								BOLD:ACV5700	1580
GMP#07728	5	BOLD:AAF9791	728	47								BOLD:ACV5946	1581
GMP#07728	5	BOLD:AAF9826	361	18								BOLD:ACV5947	1582
GMP#07728	5	BOLD:AAF9884	1069	1								BOLD:ACV6040	1583
GMP#07728	5	BOLD:AAG0387	729	6								BOLD:ACW0948	1584
GMP#07728	5	BOLD:AAG0996	363	48								BOLD:ACW1092	1585
GMP#07728	5	BOLD:AAG1322	1070	2								BOLD:ACW1110	1586
GMP#07728	5	BOLD:AAG1345	1071	1								BOLD:AAA1532	1587
GMP#07728	5	BOLD:AAG1421	1072	1								BOLD:AAA3070	1588
GMP#07728	5	BOLD:AAG1658	1073	1								BOLD:AAA3441	1589
GMP#07728	5	BOLD:AAG1712	1074	1								BOLD:AAA3892	1590
GMP#07728	5	BOLD:AAG1742	23	1								BOLD:AAA3900	1591
GMP#07728	5	BOLD:AAG1769	366	2								BOLD:AAA6910	1592
GMP#07728	5	BOLD:AAG1998	127	1								BOLD:AAA7203	1593
GMP#07728	5	BOLD:AAG2128	128	4								BOLD:AAB0096	1594
GMP#07728	5	BOLD:AAG2146	1075	1								BOLD:AAB2539	1595
GMP#07728	5	BOLD:AAG2172	1076	4								BOLD:AAB6943	1596
GMP#07728	5	BOLD:AAG2355	1077	2								BOLD:AAB7913	1597
GMP#07728	5	BOLD:AAG2460	732	2								BOLD:AAB7938	1598
GMP#07728	5	BOLD:AAG2479	130	1								BOLD:AAB8711	1599
GMP#07728	5	BOLD:AAG2513	1078	1								BOLD:AAB8851	1600
GMP#07728	5	BOLD:AAG2812	131	2								BOLD:AAC0175	1601
GMP#07728	5	BOLD:AAG2869	1079	1								BOLD:AAC2438	1602
GMP#07728	5	BOLD:AAG2878	1080	3								BOLD:AAC2439	1603
GMP#07728	5	BOLD:AAG2899	734	3								BOLD:AAC3243	1604
GMP#07728	5	BOLD:AAG2909	1081	1								BOLD:AAC6357	1605
GMP#07728	5	BOLD:AAG3193	1082	10								BOLD:AAD4214	1606
GMP#07728	5	BOLD:AAG3203	1083	3								BOLD:AAD4600	1607
GMP#07728	5	BOLD:AAG3248	132	6								BOLD:AAD6926	1608
GMP#07728	5	BOLD:AAG3259	368	2								BOLD:AAD7955	1609
GMP#07728	5	BOLD:AAG3260	369	1								BOLD:AAD9153	1610
GMP#07728	5	BOLD:AAG3261	737	2								BOLD:AAE2457	1611
GMP#07728	5	BOLD:AAG3266	25	1								BOLD:AAE7016	1612
GMP#07728	5	BOLD:AAG3274	26	2								BOLD:AAE8461	1613
GMP#07728	5	BOLD:AAG3314	1084	1								BOLD:AAF1875	1614
GMP#07728	5	BOLD:AAG3320	1085	2								BOLD:AAF1974	1615
GMP#07728	5	BOLD:AAG3323	370	2								BOLD:AAF3206	1616
GMP#07728	5	BOLD:AAG3331	738	4								BOLD:AAF5980	1617
GMP#07728	5	BOLD:AAG3340	133	5								BOLD:AAF6432	1618
GMP#07728	5	BOLD:AAG3343	1086	1								BOLD:AAF6935	1619
GMP#07728	5	BOLD:AAG3625	739	7								BOLD:AAF7621	1620
GMP#07728	5	BOLD:AAG3631	1087	1								BOLD:AAF8462	1621
GMP#07728	5	BOLD:AAG3957	1088	1								BOLD:AAF9187	1622
GMP#07728	5	BOLD:AAG4741	1089	1								BOLD:AAF9707	1623
GMP#07728	5	BOLD:AAG4775	371	3								BOLD:AAF9779	1624
GMP#07728	5	BOLD:AAG4781	1090	2								BOLD:AAG0166	1625
GMP#07728	5	BOLD:AAG4871	372	2								BOLD:AAG0172	1626
GMP#07728	5	BOLD:AAG4893	27	1								BOLD:AAG0330	1627
GMP#07728	5	BOLD:AAG4898	1091	1								BOLD:AAG0953	1628
GMP#07728	5	BOLD:AAG4923	373	10								BOLD:AAG0964	1629
GMP#07728	5	BOLD:AAG5423	374	3								BOLD:AAG0973	1630
GMP#07728	5	BOLD:AAG5457	138	4								BOLD:AAG1657	1631
GMP#07728	5	BOLD:AAG5463	375	6								BOLD:AAG2873	1632
GMP#07728	5	BOLD:AAG5464	376	3								BOLD:AAG2897	1633
GMP#07728	5	BOLD:AAG5468	1092	1								BOLD:AAG2900	1634
GMP#07728	5	BOLD:AAG5473	377	7								BOLD:AAG3236	1635
GMP#07728	5	BOLD:AAG5506	743	2								BOLD:AAG3237	1636
GMP#07728	5	BOLD:AAG5518	1093	1								BOLD:AAG3273	1637
GMP#07728	5	BOLD:AAG5523	378	2								BOLD:AAG3275	1638
GMP#07728	5	BOLD:AAG5541	744	2								BOLD:AAG3304	1639
GMP#07728	5	BOLD:AAG5542	379	1								BOLD:AAG3316	1640
GMP#07728	5	BOLD:AAG5788	1094	1								BOLD:AAG3338	1641
GMP#07728	5	BOLD:AAG5792	1095	1								BOLD:AAG4827	1642
GMP#07728	5	BOLD:AAG5797	1096	1								BOLD:AAG4908	1643
GMP#07728	5	BOLD:AAG6431	1097	1								BOLD:AAG4922	1644
GMP#07728	5	BOLD:AAG6475	381	5								BOLD:AAG4953	1645
GMP#07728	5	BOLD:AAG6494	745	4								BOLD:AAG4960	1646
GMP#07728	5	BOLD:AAG6519	1098	1								BOLD:AAG5060	1647
GMP#07728	5	BOLD:AAG6743	382	7								BOLD:AAG5640	1648
GMP#07728	5	BOLD:AAG6744	1099	3								BOLD:AAG6934	1649
GMP#07728	5	BOLD:AAG6745	28	1								BOLD:AAG6951	1650
GMP#07728	5	BOLD:AAG6907	1100	1								BOLD:AAG7275	1651
GMP#07728	5	BOLD:AAG6954	1101	1								BOLD:AAG7279	1652
GMP#07728	5	BOLD:AAG7064	1102	1								BOLD:AAG7638	1653
GMP#07728	5	BOLD:AAG7276	1103	2								BOLD:AAG7642	1654
GMP#07728	5	BOLD:AAG7308	385	1								BOLD:AAG7666	1655
GMP#07728	5	BOLD:AAG7312	747	5								BOLD:AAG7740	1656
GMP#07728	5	BOLD:AAG7634	1104	1								BOLD:AAG8176	1657
GMP#07728	5	BOLD:AAG7641	1105	2								BOLD:AAG8269	1658
GMP#07728	5	BOLD:AAG7679	748	1								BOLD:AAG8491	1659
GMP#07728	5	BOLD:AAG7687	1106	5								BOLD:AAG8500	1660
GMP#07728	5	BOLD:AAG7710	749	7								BOLD:AAG8839	1661
GMP#07728	5	BOLD:AAG7713	1107	1								BOLD:AAG8842	1662
GMP#07728	5	BOLD:AAG7732	1108	1								BOLD:AAG9668	1663
GMP#07728	5	BOLD:AAG7737	141	2								BOLD:AAG9690	1664
GMP#07728	5	BOLD:AAG7762	1109	1								BOLD:AAG9691	1665
GMP#07728	5	BOLD:AAG7898	386	1								BOLD:AAH0134	1666
GMP#07728	5	BOLD:AAG7963	1110	1								BOLD:AAH0469	1667
GMP#07728	5	BOLD:AAG8323	754	3								BOLD:AAH1652	1668
GMP#07728	5	BOLD:AAG8371	1111	1								BOLD:AAH2179	1669
GMP#07728	5	BOLD:AAG8409	1112	17								BOLD:AAH3190	1670
GMP#07728	5	BOLD:AAG8493	388	8								BOLD:AAH3228	1671
GMP#07728	5	BOLD:AAG9189	391	1								BOLD:AAH3655	1672
GMP#07728	5	BOLD:AAG9197	1113	1								BOLD:AAH3662	1673
GMP#07728	5	BOLD:AAG9234	1114	2								BOLD:AAH3701	1674
GMP#07728	5	BOLD:AAG9699	1115	1								BOLD:AAH3717	1675
GMP#07728	5	BOLD:AAG9713	392	3								BOLD:AAH3742	1676
GMP#07728	5	BOLD:AAH0019	1116	1								BOLD:AAH3749	1677
GMP#07728	5	BOLD:AAH0127	1117	7								BOLD:AAH4135	1678
GMP#07728	5	BOLD:AAH0256	143	1								BOLD:AAH4171	1679
GMP#07728	5	BOLD:AAH1692	756	1								BOLD:AAH4180	1680
GMP#07728	5	BOLD:AAH1693	757	1								BOLD:AAH4276	1681
GMP#07728	5	BOLD:AAH1764	1118	1								BOLD:AAH4285	1682
GMP#07728	5	BOLD:AAH1793	758	5								BOLD:AAH7061	1683
GMP#07728	5	BOLD:AAH1886	144	1								BOLD:AAJ2005	1684
GMP#07728	5	BOLD:AAH2376	396	1								BOLD:AAJ4032	1685
GMP#07728	5	BOLD:AAH2876	398	4								BOLD:AAJ5372	1686
GMP#07728	5	BOLD:AAH3516	1119	1								BOLD:AAL4236	1687
GMP#07728	5	BOLD:AAH3530	1120	3								BOLD:AAL4268	1688
GMP#07728	5	BOLD:AAH3532	1121	1								BOLD:AAM4998	1689
GMP#07728	5	BOLD:AAH3617	762	2								BOLD:AAM6097	1690
GMP#07728	5	BOLD:AAH3664	1122	2								BOLD:AAM6116	1691
GMP#07728	5	BOLD:AAH3720	763	4								BOLD:AAM6117	1692
GMP#07728	5	BOLD:AAH3741	764	2								BOLD:AAM6234	1693
GMP#07728	5	BOLD:AAH3755	765	10								BOLD:AAM6783	1694
GMP#07728	5	BOLD:AAH3770	1123	1								BOLD:AAM7379	1695
GMP#07728	5	BOLD:AAH3904	146	4								BOLD:AAM7451	1696
GMP#07728	5	BOLD:AAH3947	766	4								BOLD:AAM7520	1697
GMP#07728	5	BOLD:AAH3951	1124	1								BOLD:AAM7658	1698
GMP#07728	5	BOLD:AAH3968	767	13								BOLD:AAM7892	1699
GMP#07728	5	BOLD:AAH3983	768	1								BOLD:AAM7961	1700
GMP#07728	5	BOLD:AAH4210	1125	1								BOLD:AAM9355	1701
GMP#07728	5	BOLD:AAH4225	770	3								BOLD:AAM9375	1702
GMP#07728	5	BOLD:AAH4229	1126	4								BOLD:AAM9392	1703
GMP#07728	5	BOLD:AAH4235	1127	3								BOLD:AAN3726	1704
GMP#07728	5	BOLD:AAH5592	1128	1								BOLD:AAN5147	1705
GMP#07728	5	BOLD:AAH7052	1129	1								BOLD:AAN5154	1706
GMP#07728	5	BOLD:AAH7068	400	16								BOLD:AAN5172	1707
GMP#07728	5	BOLD:AAH7139	1130	1								BOLD:AAN5181	1708
GMP#07728	5	BOLD:AAH8507	1131	1								BOLD:AAN5198	1709
GMP#07728	5	BOLD:AAI0007	1132	2								BOLD:AAN5199	1710
GMP#07728	5	BOLD:AAI2681	38	1								BOLD:AAN5212	1711
GMP#07728	5	BOLD:AAI3014	152	20								BOLD:AAN5223	1712
GMP#07728	5	BOLD:AAI3015	403	3								BOLD:AAN5241	1713
GMP#07728	5	BOLD:AAI3260	1133	1								BOLD:AAN5244	1714
GMP#07728	5	BOLD:AAI3360	1134	1								BOLD:AAN5256	1715
GMP#07728	5	BOLD:AAI4543	1135	1								BOLD:AAN5264	1716
GMP#07728	5	BOLD:AAI4969	1136	1								BOLD:AAN5282	1717
GMP#07728	5	BOLD:AAI5103	777	2								BOLD:AAN5285	1718
GMP#07728	5	BOLD:AAI6141	1137	1								BOLD:AAN5328	1719
GMP#07728	5	BOLD:AAI6272	1138	1								BOLD:AAN5334	1720
GMP#07728	5	BOLD:AAI7042	1139	1								BOLD:AAN5335	1721
GMP#07728	5	BOLD:AAI7960	405	1								BOLD:AAN5430	1722
GMP#07728	5	BOLD:AAI8935	42	3								BOLD:AAN5528	1723
GMP#07728	5	BOLD:AAJ0212	1140	7								BOLD:AAN5648	1724
GMP#07728	5	BOLD:AAJ0565	1141	1								BOLD:AAN5667	1725
GMP#07728	5	BOLD:AAJ4031	778	2								BOLD:AAN6408	1726
GMP#07728	5	BOLD:AAJ7105	1142	20								BOLD:AAN6414	1727
GMP#07728	5	BOLD:AAK0114	1143	1								BOLD:AAN6439	1728
GMP#07728	5	BOLD:AAK5607	1144	1								BOLD:AAN6616	1729
GMP#07728	5	BOLD:AAK6504	1145	1								BOLD:AAN7553	1730
GMP#07728	5	BOLD:AAK7242	1146	3								BOLD:AAN8025	1731
GMP#07728	5	BOLD:AAK8171	1147	2								BOLD:AAN8044	1732
GMP#07728	5	BOLD:AAL0380	781	3								BOLD:AAN8140	1733
GMP#07728	5	BOLD:AAL0908	1148	1								BOLD:AAN8418	1734
GMP#07728	5	BOLD:AAL5084	1149	4								BOLD:AAN8447	1735
GMP#07728	5	BOLD:AAL7329	410	7								BOLD:AAN8771	1736
GMP#07728	5	BOLD:AAL7356	782	1								BOLD:AAO0558	1737
GMP#07728	5	BOLD:AAL7370	783	4								BOLD:AAO1339	1738
GMP#07728	5	BOLD:AAL7396	1150	4								BOLD:AAO4332	1739
GMP#07728	5	BOLD:AAL8961	1151	6								BOLD:AAP1085	1740
GMP#07728	5	BOLD:AAL9076	159	5								BOLD:AAP5019	1741
GMP#07728	5	BOLD:AAL9079	413	2								BOLD:AAP6849	1742
GMP#07728	5	BOLD:AAL9138	1152	1								BOLD:AAP8584	1743
GMP#07728	5	BOLD:AAM1948	1153	3								BOLD:AAP8823	1744
GMP#07728	5	BOLD:AAM6037	1154	6								BOLD:AAQ0262	1745
GMP#07728	5	BOLD:AAM6039	1155	1								BOLD:AAQ0271	1746
GMP#07728	5	BOLD:AAM6184	1156	1								BOLD:AAQ0296	1747
GMP#07728	5	BOLD:AAM6249	1157	2								BOLD:AAQ1028	1748
GMP#07728	5	BOLD:AAM6270	1158	1								BOLD:AAR3352	1749
GMP#07728	5	BOLD:AAM6273	785	4								BOLD:AAR7014	1750
GMP#07728	5	BOLD:AAM6277	415	13								BOLD:AAU0618	1751
GMP#07728	5	BOLD:AAM6286	416	4								BOLD:AAU6483	1752
GMP#07728	5	BOLD:AAM6287	1159	1								BOLD:AAU6537	1753
GMP#07728	5	BOLD:AAM6288	46	2								BOLD:AAU6538	1754
GMP#07728	5	BOLD:AAM6289	417	2								BOLD:AAU6542	1755
GMP#07728	5	BOLD:AAM6293	161	4								BOLD:AAU6616	1756
GMP#07728	5	BOLD:AAM7333	419	1								BOLD:AAU6910	1757
GMP#07728	5	BOLD:AAM7334	1160	2								BOLD:AAU6912	1758
GMP#07728	5	BOLD:AAM7337	420	2								BOLD:AAU6934	1759
GMP#07728	5	BOLD:AAM7401	787	1								BOLD:AAU6967	1760
GMP#07728	5	BOLD:AAM7487	163	1								BOLD:AAU7170	1761
GMP#07728	5	BOLD:AAM7996	1161	1								BOLD:AAU7339	1762
GMP#07728	5	BOLD:AAM8980	1162	1								BOLD:AAU8379	1763
GMP#07728	5	BOLD:AAM9117	164	1								BOLD:AAU8566	1764
GMP#07728	5	BOLD:AAM9125	1163	1								BOLD:AAU8625	1765
GMP#07728	5	BOLD:AAM9242	165	1								BOLD:AAU8687	1766
GMP#07728	5	BOLD:AAM9243	790	4								BOLD:AAU9004	1767
GMP#07728	5	BOLD:AAM9252	426	42								BOLD:AAU9080	1768
GMP#07728	5	BOLD:AAM9347	48	4								BOLD:AAV0159	1769
GMP#07728	5	BOLD:AAM9365	1164	1								BOLD:AAV0236	1770
GMP#07728	5	BOLD:AAM9376	1165	1								BOLD:AAV1261	1771
GMP#07728	5	BOLD:AAN5149	1166	1								BOLD:AAV3698	1772
GMP#07728	5	BOLD:AAN5151	1167	1								BOLD:AAV5325	1773
GMP#07728	5	BOLD:AAN5155	1168	1								BOLD:AAV5352	1774
GMP#07728	5	BOLD:AAN5158	1169	1								BOLD:AAV5568	1775
GMP#07728	5	BOLD:AAN5161	428	6								BOLD:AAV5575	1776
GMP#07728	5	BOLD:AAN5162	429	3								BOLD:AAV5792	1777
GMP#07728	5	BOLD:AAN5193	432	5								BOLD:AAY6374	1778
GMP#07728	5	BOLD:AAN5200	1170	5								BOLD:AAY6429	1779
GMP#07728	5	BOLD:AAN5221	1171	2								BOLD:AAY6530	1780
GMP#07728	5	BOLD:AAN5229	1172	1								BOLD:AAY6554	1781
GMP#07728	5	BOLD:AAN5233	791	29								BOLD:AAY6737	1782
GMP#07728	5	BOLD:AAN5235	792	4								BOLD:AAY8918	1783
GMP#07728	5	BOLD:AAN5249	793	1								BOLD:AAY9192	1784
GMP#07728	5	BOLD:AAN5250	1173	1								BOLD:AAY9197	1785
GMP#07728	5	BOLD:AAN5259	1174	1								BOLD:AAZ0267	1786
GMP#07728	5	BOLD:AAN5261	794	11								BOLD:AAZ0283	1787
GMP#07728	5	BOLD:AAN5267	434	6								BOLD:AAZ1979	1788
GMP#07728	5	BOLD:AAN5269	795	12								BOLD:AAZ3286	1789
GMP#07728	5	BOLD:AAN5271	1175	1								BOLD:AAZ3290	1790
GMP#07728	5	BOLD:AAN5311	796	2								BOLD:AAZ5709	1791
GMP#07728	5	BOLD:AAN5330	168	9								BOLD:AAZ6701	1792
GMP#07728	5	BOLD:AAN5336	1176	1								BOLD:ABA0817	1793
GMP#07728	5	BOLD:AAN5343	1177	2								BOLD:ABA2981	1794
GMP#07728	5	BOLD:AAN5344	1178	1								BOLD:ABA5313	1795
GMP#07728	5	BOLD:AAN5345	435	3								BOLD:ABA5805	1796
GMP#07728	5	BOLD:AAN5351	1179	1								BOLD:ABA5877	1797
GMP#07728	5	BOLD:AAN5352	436	2								BOLD:ABA5909	1798
GMP#07728	5	BOLD:AAN5354	437	7								BOLD:ABA5939	1799
GMP#07728	5	BOLD:AAN5355	49	1								BOLD:ABA5989	1800
GMP#07728	5	BOLD:AAN5358	50	1								BOLD:ABA6117	1801
GMP#07728	5	BOLD:AAN5383	1180	3								BOLD:ABA6265	1802
GMP#07728	5	BOLD:AAN5441	1181	1								BOLD:ABA6370	1803
GMP#07728	5	BOLD:AAN5497	1182	1								BOLD:ABA6490	1804
GMP#07728	5	BOLD:AAN5500	1183	1								BOLD:ABA7871	1805
GMP#07728	5	BOLD:AAN5503	1184	1								BOLD:ABA7887	1806
GMP#07728	5	BOLD:AAN5505	1185	1								BOLD:ABA7903	1807
GMP#07728	5	BOLD:AAN5663	440	1								BOLD:ABA7969	1808
GMP#07728	5	BOLD:AAN6148	441	3								BOLD:ABA8754	1809
GMP#07728	5	BOLD:AAN6154	51	1								BOLD:ABA9100	1810
GMP#07728	5	BOLD:AAN6235	1186	1								BOLD:ABU5538	1811
GMP#07728	5	BOLD:AAN6407	172	3								BOLD:ABV0271	1812
GMP#07728	5	BOLD:AAN6429	1187	1								BOLD:ABV0455	1813
GMP#07728	5	BOLD:AAN6433	800	2								BOLD:ABV0456	1814
GMP#07728	5	BOLD:AAN6435	446	29								BOLD:ABV0494	1815
GMP#07728	5	BOLD:AAN6437	1188	5								BOLD:ABV0498	1816
GMP#07728	5	BOLD:AAN6440	1189	5								BOLD:ABV1310	1817
GMP#07728	5	BOLD:AAN6445	801	3								BOLD:ABV1356	1818
GMP#07728	5	BOLD:AAN6447	447	10								BOLD:ABV1369	1819
GMP#07728	5	BOLD:AAN6614	1190	1								BOLD:ABV1390	1820
GMP#07728	5	BOLD:AAN6770	1191	1								BOLD:ABV1473	1821
GMP#07728	5	BOLD:AAN7559	1192	1								BOLD:ABV9015	1822
GMP#07728	5	BOLD:AAN7591	1193	1								BOLD:ABV9078	1823
GMP#07728	5	BOLD:AAN7641	1194	1								BOLD:ABV9278	1824
GMP#07728	5	BOLD:AAN8137	450	2								BOLD:ABW1193	1825
GMP#07728	5	BOLD:AAN8138	1195	1								BOLD:ABW1379	1826
GMP#07728	5	BOLD:AAN8172	1196	2								BOLD:ABW2639	1827
GMP#07728	5	BOLD:AAN8250	1197	4								BOLD:ABW2751	1828
GMP#07728	5	BOLD:AAN8263	1198	1								BOLD:ABW2910	1829
GMP#07728	5	BOLD:AAN8337	1199	3								BOLD:ABW2915	1830
GMP#07728	5	BOLD:AAN8633	1200	1								BOLD:ABW3132	1831
GMP#07728	5	BOLD:AAN8679	52	1								BOLD:ABW3161	1832
GMP#07728	5	BOLD:AAN8687	1201	1								BOLD:ABW3209	1833
GMP#07728	5	BOLD:AAN8692	1202	1								BOLD:ABW3242	1834
GMP#07728	5	BOLD:AAN8705	1203	1								BOLD:ABW3280	1835
GMP#07728	5	BOLD:AAN8711	1204	1								BOLD:ABW6289	1836
GMP#07728	5	BOLD:AAN8770	174	2								BOLD:ABW8020	1837
GMP#07728	5	BOLD:AAN9209	1205	1								BOLD:ABW8037	1838
GMP#07728	5	BOLD:AAO7623	1206	3								BOLD:ABW8698	1839
GMP#07728	5	BOLD:AAO7630	1207	1								BOLD:ABW9580	1840
GMP#07728	5	BOLD:AAO8361	177	2								BOLD:ABW9876	1841
GMP#07728	5	BOLD:AAO8579	456	1								BOLD:ABX2611	1842
GMP#07728	5	BOLD:AAP1210	1208	1								BOLD:ABX3660	1843
GMP#07728	5	BOLD:AAP1834	1209	1								BOLD:ABX8054	1844
GMP#07728	5	BOLD:AAP2487	1210	1								BOLD:ABX8608	1845
GMP#07728	5	BOLD:AAP2528	1211	2								BOLD:ABX9329	1846
GMP#07728	5	BOLD:AAP2540	458	2								BOLD:ABX9467	1847
GMP#07728	5	BOLD:AAP2854	807	2								BOLD:ABX9742	1848
GMP#07728	5	BOLD:AAP2857	809	1								BOLD:ABY1179	1849
GMP#07728	5	BOLD:AAP2858	810	37								BOLD:ABY1452	1850
GMP#07728	5	BOLD:AAP2970	460	2								BOLD:ABY2067	1851
GMP#07728	5	BOLD:AAP2973	811	8								BOLD:ABY5318	1852
GMP#07728	5	BOLD:AAP2998	812	5								BOLD:ABZ7164	1853
GMP#07728	5	BOLD:AAP3767	54	2								BOLD:ACA2933	1854
GMP#07728	5	BOLD:AAP3780	182	1								BOLD:ACA5184	1855
GMP#07728	5	BOLD:AAP4581	1212	3								BOLD:ACA7277	1856
GMP#07728	5	BOLD:AAP4734	183	1								BOLD:ACA7518	1857
GMP#07728	5	BOLD:AAP4828	1213	1								BOLD:ACA7711	1858
GMP#07728	5	BOLD:AAP5113	1214	3								BOLD:ACA7752	1859
GMP#07728	5	BOLD:AAP5870	465	4								BOLD:ACA9569	1860
GMP#07728	5	BOLD:AAP5920	185	4								BOLD:ACA9720	1861
GMP#07728	5	BOLD:AAP6322	1215	2								BOLD:ACA9953	1862
GMP#07728	5	BOLD:AAP6354	1216	1								BOLD:ACB0715	1863
GMP#07728	5	BOLD:AAP6357	1217	1								BOLD:ACB0984	1864
GMP#07728	5	BOLD:AAP6420	1218	1								BOLD:ACB1149	1865
GMP#07728	5	BOLD:AAP6465	466	18								BOLD:ACB1800	1866
GMP#07728	5	BOLD:AAP6466	1219	1								BOLD:ACB2053	1867
GMP#07728	5	BOLD:AAP6689	467	1								BOLD:ACB2221	1868
GMP#07728	5	BOLD:AAP6693	1220	1								BOLD:ACB3033	1869
GMP#07728	5	BOLD:AAP6915	468	18								BOLD:ACB8750	1870
GMP#07728	5	BOLD:AAP7035	817	1								BOLD:ACC1294	1871
GMP#07728	5	BOLD:AAP7640	818	14								BOLD:ACC1509	1872
GMP#07728	5	BOLD:AAP7841	471	1								BOLD:ACC1855	1873
GMP#07728	5	BOLD:AAP8069	1221	2								BOLD:ACC5677	1874
GMP#07728	5	BOLD:AAP8071	1222	1								BOLD:ACC7074	1875
GMP#07728	5	BOLD:AAP8757	191	2								BOLD:ACC7924	1876
GMP#07728	5	BOLD:AAP8784	1223	3								BOLD:ACC7974	1877
GMP#07728	5	BOLD:AAP8831	472	4								BOLD:ACC8034	1878
GMP#07728	5	BOLD:AAP8833	1224	1								BOLD:ACC8041	1879
GMP#07728	5	BOLD:AAP8895	1225	2								BOLD:ACC8165	1880
GMP#07728	5	BOLD:AAP8989	1226	2								BOLD:ACC8280	1881
GMP#07728	5	BOLD:AAP8999	1227	6								BOLD:ACC8493	1882
GMP#07728	5	BOLD:AAQ0265	1228	11								BOLD:ACC8702	1883
GMP#07728	5	BOLD:AAQ0299	1229	3								BOLD:ACC8788	1884
GMP#07728	5	BOLD:AAQ0583	821	1								BOLD:ACC9200	1885
GMP#07728	5	BOLD:AAQ0594	1230	1								BOLD:ACC9233	1886
GMP#07728	5	BOLD:AAQ0601	1231	1								BOLD:ACD0200	1887
GMP#07728	5	BOLD:AAQ0634	475	3								BOLD:ACD1757	1888
GMP#07728	5	BOLD:AAQ0692	1232	2								BOLD:ACD3100	1889
GMP#07728	5	BOLD:AAQ0818	1233	3								BOLD:ACD3287	1890
GMP#07728	5	BOLD:AAQ0819	1234	5								BOLD:ACD6132	1891
GMP#07728	5	BOLD:AAQ0833	477	1								BOLD:ACD8765	1892
GMP#07728	5	BOLD:AAQ2523	1235	3								BOLD:ACE0829	1893
GMP#07728	5	BOLD:AAQ2556	1236	5								BOLD:ACE0982	1894
GMP#07728	5	BOLD:AAQ2559	1237	1								BOLD:ACE3131	1895
GMP#07728	5	BOLD:AAQ2892	1238	3								BOLD:ACE3371	1896
GMP#07728	5	BOLD:AAQ2937	824	7								BOLD:ACE5277	1897
GMP#07728	5	BOLD:AAU4506	1239	1								BOLD:ACE5873	1898
GMP#07728	5	BOLD:AAU4830	1240	1								BOLD:ACE6955	1899
GMP#07728	5	BOLD:AAU4881	1241	2								BOLD:ACE8735	1900
GMP#07728	5	BOLD:AAU5599	1242	3								BOLD:ACE8808	1901
GMP#07728	5	BOLD:AAU5682	479	1								BOLD:ACE9303	1902
GMP#07728	5	BOLD:AAU6510	1243	1								BOLD:ACF3297	1903
GMP#07728	5	BOLD:AAU6511	480	1								BOLD:ACF7191	1904
GMP#07728	5	BOLD:AAU6513	481	4								BOLD:ACF8198	1905
GMP#07728	5	BOLD:AAU6524	193	1								BOLD:ACF8991	1906
GMP#07728	5	BOLD:AAU6526	1244	1								BOLD:ACG4894	1907
GMP#07728	5	BOLD:AAU6533	1245	1								BOLD:ACG6762	1908
GMP#07728	5	BOLD:AAU6535	482	6								BOLD:ACG7292	1909
GMP#07728	5	BOLD:AAU6540	1246	2								BOLD:ACG9804	1910
GMP#07728	5	BOLD:AAU6544	1247	1								BOLD:ACH1957	1911
GMP#07728	5	BOLD:AAU6592	1248	4								BOLD:ACI3345	1912
GMP#07728	5	BOLD:AAU6594	1249	1								BOLD:ACI3903	1913
GMP#07728	5	BOLD:AAU6595	1250	1								BOLD:ACI4196	1914
GMP#07728	5	BOLD:AAU6609	1251	1								BOLD:ACI4243	1915
GMP#07728	5	BOLD:AAU6614	826	4								BOLD:ACI4486	1916
GMP#07728	5	BOLD:AAU6618	827	5								BOLD:ACI5029	1917
GMP#07728	5	BOLD:AAU6620	828	3								BOLD:ACI5626	1918
GMP#07728	5	BOLD:AAU6622	1252	1								BOLD:ACI6350	1919
GMP#07728	5	BOLD:AAU6624	58	2								BOLD:ACI7088	1920
GMP#07728	5	BOLD:AAU6626	829	6								BOLD:ACI7197	1921
GMP#07728	5	BOLD:AAU6627	1253	4								BOLD:ACI7288	1922
GMP#07728	5	BOLD:AAU6629	830	1								BOLD:ACJ0111	1923
GMP#07728	5	BOLD:AAU6970	59	2								BOLD:ACJ0616	1924
GMP#07728	5	BOLD:AAU7330	1254	1								BOLD:ACJ1122	1925
GMP#07728	5	BOLD:AAU7678	490	1								BOLD:ACJ1628	1926
GMP#07728	5	BOLD:AAU8203	492	4								BOLD:ACJ7345	1927
GMP#07728	5	BOLD:AAU8210	1255	1								BOLD:ACK1237	1928
GMP#07728	5	BOLD:AAU8212	1256	1								BOLD:ACK1316	1929
GMP#07728	5	BOLD:AAU8223	1257	1								BOLD:ACK1730	1930
GMP#07728	5	BOLD:AAU8228	1258	1								BOLD:ACK1743	1931
GMP#07728	5	BOLD:AAU8327	1259	1								BOLD:ACK1745	1932
GMP#07728	5	BOLD:AAU8342	832	16								BOLD:ACK1765	1933
GMP#07728	5	BOLD:AAU8348	1260	1								BOLD:ACK1895	1934
GMP#07728	5	BOLD:AAU8358	198	2								BOLD:ACK2103	1935
GMP#07728	5	BOLD:AAU8361	1261	1								BOLD:ACK2160	1936
GMP#07728	5	BOLD:AAU8365	833	3								BOLD:ACK2239	1937
GMP#07728	5	BOLD:AAU8380	493	2								BOLD:ACK2532	1938
GMP#07728	5	BOLD:AAU8389	837	2								BOLD:ACK3527	1939
GMP#07728	5	BOLD:AAU8399	200	3								BOLD:ACK4473	1940
GMP#07728	5	BOLD:AAU8441	838	2								BOLD:ACK8001	1941
GMP#07728	5	BOLD:AAU8455	494	7								BOLD:ACK8299	1942
GMP#07728	5	BOLD:AAU8485	839	2								BOLD:ACL1096	1943
GMP#07728	5	BOLD:AAU8490	1262	1								BOLD:ACL2659	1944
GMP#07728	5	BOLD:AAU8534	1263	2								BOLD:ACL3441	1945
GMP#07728	5	BOLD:AAU8583	1264	1								BOLD:ACL3751	1946
GMP#07728	5	BOLD:AAU8619	1265	1								BOLD:ACL3853	1947
GMP#07728	5	BOLD:AAU8646	1266	1								BOLD:ACL4089	1948
GMP#07728	5	BOLD:AAU8680	840	1								BOLD:ACL4289	1949
GMP#07728	5	BOLD:AAU8702	1267	2								BOLD:ACL5283	1950
GMP#07728	5	BOLD:AAU8706	496	4								BOLD:ACL5302	1951
GMP#07728	5	BOLD:AAU8736	1268	1								BOLD:ACL5434	1952
GMP#07728	5	BOLD:AAU8802	1269	1								BOLD:ACL6055	1953
GMP#07728	5	BOLD:AAU8895	1270	1								BOLD:ACL6776	1954
GMP#07728	5	BOLD:AAU8999	1271	2								BOLD:ACL7631	1955
GMP#07728	5	BOLD:AAU9045	1272	1								BOLD:ACL7730	1956
GMP#07728	5	BOLD:AAV0157	203	4								BOLD:ACL7902	1957
GMP#07728	5	BOLD:AAV0836	1273	1								BOLD:ACL8389	1958
GMP#07728	5	BOLD:AAV0903	843	3								BOLD:ACL8560	1959
GMP#07728	5	BOLD:AAV1136	501	1								BOLD:ACL8670	1960
GMP#07728	5	BOLD:AAV3042	1274	3								BOLD:ACL9909	1961
GMP#07728	5	BOLD:AAV3887	1275	1								BOLD:ACM1304	1962
GMP#07728	5	BOLD:AAV4861	1276	1								BOLD:ACM2546	1963
GMP#07728	5	BOLD:AAV4975	1277	2								BOLD:ACM2703	1964
GMP#07728	5	BOLD:AAV5088	845	2								BOLD:ACM7465	1965
GMP#07728	5	BOLD:AAV5157	1278	1								BOLD:ACM7529	1966
GMP#07728	5	BOLD:AAV5177	1279	1								BOLD:ACM9237	1967
GMP#07728	5	BOLD:AAV5319	1280	1								BOLD:ACN0389	1968
GMP#07728	5	BOLD:AAV5322	1281	2								BOLD:ACN2134	1969
GMP#07728	5	BOLD:AAV5323	1282	1								BOLD:ACN2213	1970
GMP#07728	5	BOLD:AAV5329	1283	5								BOLD:ACN5021	1971
GMP#07728	5	BOLD:AAV5355	1284	2								BOLD:ACN5893	1972
GMP#07728	5	BOLD:AAV5552	1285	2								BOLD:ACO5111	1973
GMP#07728	5	BOLD:AAV5562	1286	16								BOLD:ACO5919	1974
GMP#07728	5	BOLD:AAV5762	1287	2								BOLD:ACO7449	1975
GMP#07728	5	BOLD:AAV5790	1288	1								BOLD:ACP0011	1976
GMP#07728	5	BOLD:AAV5793	846	1								BOLD:ACP5423	1977
GMP#07728	5	BOLD:AAV5796	1289	2								BOLD:ACQ9086	1978
GMP#07728	5	BOLD:AAW6380	1290	1								BOLD:ACR4394	1979
GMP#07728	5	BOLD:AAY1337	1291	1								BOLD:ACR8420	1980
GMP#07728	5	BOLD:AAY6407	1292	1								BOLD:ACS1971	1981
GMP#07728	5	BOLD:AAY6412	207	2								BOLD:ACS9522	1982
GMP#07728	5	BOLD:AAY6445	1293	1								BOLD:ACU0916	1983
GMP#07728	5	BOLD:AAY6450	1294	2								BOLD:ACU3942	1984
GMP#07728	5	BOLD:AAY6456	848	9								BOLD:ACU4727	1985
GMP#07728	5	BOLD:AAY6541	1295	1								BOLD:ACU6062	1986
GMP#07728	5	BOLD:AAY6678	1296	1								BOLD:ACU6072	1987
GMP#07728	5	BOLD:AAY6734	850	1								BOLD:ACU6359	1988
GMP#07728	5	BOLD:AAY6736	851	2								BOLD:ACV3095	1989
GMP#07728	5	BOLD:AAY6738	209	18								BOLD:ACV3513	1990
GMP#07728	5	BOLD:AAY6741	1297	1								BOLD:ACV3844	1991
GMP#07728	5	BOLD:AAY6747	210	1								BOLD:ACV4074	1992
GMP#07728	5	BOLD:AAY9807	853	1								BOLD:ACV4258	1993
GMP#07728	5	BOLD:AAY9905	1298	1								BOLD:ACV4441	1994
GMP#07728	5	BOLD:AAZ0144	854	4								BOLD:ACV4546	1995
GMP#07728	5	BOLD:AAZ0166	517	2								BOLD:ACV4670	1996
GMP#07728	5	BOLD:AAZ0173	1299	1								BOLD:ACV4812	1997
GMP#07728	5	BOLD:AAZ0294	1300	1								BOLD:ACV4877	1998
GMP#07728	5	BOLD:AAZ1968	1301	3								BOLD:ACV4879	1999
[truncated: 5,952 more rows]

## Sheet: EstSInput
Accumulation curve for rare
3989	163
1	1	2
1	2	1
1	3	1
1	4	1
1	5	15
1	6	5
1	7	1
1	8	1
1	9	25
1	10	1
1	11	1
1	12	1
1	13	1
1	14	7
1	15	1
1	16	1
1	17	1
1	18	1
1	19	1
1	20	1
1	21	2
1	22	12
1	23	1
1	24	3
1	25	7
1	26	27
1	27	3
1	28	25
1	29	3
1	30	1
1	31	2
1	32	1
1	33	3
1	34	1
1	35	1
1	36	1
1	37	10
1	38	1
1	39	1
1	40	1
1	41	2
1	42	2
1	43	4
1	44	1
1	45	1
1	46	1
1	47	1
1	48	1
1	49	1
1	50	1
1	51	4
1	52	7
1	53	4
1	54	1
1	55	11
1	56	7
1	57	8
1	58	1
1	59	1
1	60	2
1	61	1
1	62	6
1	63	2
1	64	1
1	65	4
1	66	1
1	67	2
1	68	1
1	69	6
1	70	3
1	71	1
1	72	1
1	73	1
1	74	2
1	75	2
1	76	1
1	77	1
1	78	1
1	79	1
1	80	89
1	81	1
1	82	1
1	83	2
1	84	1
1	85	1
1	86	1
1	87	1
1	88	3
1	89	5
1	90	2
1	91	3
1	92	1
1	93	1
2	94	1
2	1	5
2	95	1
2	2	1
2	5	13
2	96	1
2	97	10
2	6	4
2	7	1
2	98	1
2	99	1
2	100	4
2	101	1
2	9	2
2	10	1
2	102	1
2	11	1
2	14	3
2	15	1
2	16	3
2	17	13
2	103	1
2	104	1
2	105	1
2	106	1
2	107	1
2	108	2
2	109	1
2	110	1
2	111	1
2	112	2
2	113	1
2	114	1
2	115	1
2	21	2
2	116	1
2	117	1
2	118	1
2	119	1
2	120	1
2	121	1
2	122	1
2	123	1
2	22	2
2	124	1
2	125	1
2	126	1
2	23	8
2	127	2
2	24	3
2	128	1
2	129	1
2	130	2
2	131	20
2	132	1
2	25	3
2	26	42
2	133	5
2	134	1
2	135	1
2	27	6
2	136	2
2	137	1
2	138	1
2	139	1
2	140	1
2	28	27
2	29	7
2	30	1
2	141	5
2	142	2
2	32	1
2	35	2
2	143	3
2	144	1
2	36	1
2	145	1
2	146	3
2	147	2
2	148	1
2	149	1
2	37	4
2	38	5
2	150	1
2	151	1
2	39	5
2	152	3
2	41	1
2	42	20
2	43	3
2	153	1
2	154	1
2	155	1
2	156	1
2	157	3
2	158	1
2	159	2
2	160	1
2	46	3
2	161	1
2	162	2
2	163	2
2	47	6
2	164	1
2	165	1
2	48	3
2	166	1
2	167	1
2	168	4
2	169	1
2	170	3
2	49	5
2	50	4
2	51	28
2	171	1
2	172	1
2	173	5
2	52	12
2	174	4
2	175	1
2	176	1
2	177	17
2	178	1
2	179	1
2	180	2
2	181	1
2	53	19
2	54	1
2	182	4
2	183	2
2	184	3
2	185	12
2	186	1
2	55	5
2	187	1
2	188	1
2	189	1
2	56	9
2	190	1
2	191	2
2	57	2
2	192	1
2	193	1
2	194	9
2	58	2
2	195	1
2	59	5
2	196	1
2	197	2
2	198	1
2	199	2
2	200	2
2	61	2
2	201	2
2	202	2
2	203	4
2	204	1
2	205	1
2	62	5
2	206	1
2	207	1
2	208	1
2	209	35
2	210	1
2	211	7
2	212	2
2	213	1
2	214	3
2	215	3
2	216	1
2	217	1
2	218	26
2	219	42
2	220	2
2	63	55
2	64	5
2	65	2
2	221	1
2	222	6
2	223	2
2	224	14
2	225	3
2	226	3
2	227	1
2	228	5
2	229	4
2	230	1
2	67	6
2	231	1
2	232	1
2	69	7
2	70	94
2	233	9
2	71	4
2	234	6
2	235	1
2	236	1
2	237	2
2	238	1
2	239	1
2	240	1
2	73	18
2	241	1
2	242	1
2	243	3
2	244	8
2	245	2
2	246	3
2	247	1
2	248	4
2	249	1
2	250	1
2	251	3
2	252	1
2	253	10
2	254	5
2	255	4
2	79	1
2	256	2
2	257	2
2	80	84
2	258	1
2	259	1
2	260	1
2	261	1
2	262	1
2	263	1
2	264	2
2	265	6
2	266	5
2	267	1
2	268	1
2	269	1
2	270	3
2	271	1
2	272	1
2	273	34
2	274	1
2	275	1
2	276	2
2	84	1
2	277	1
2	278	5
2	279	1
2	280	3
2	281	6
2	282	5
2	283	1
2	284	2
2	285	2
2	286	1
2	287	1
2	288	1
2	289	1
2	290	1
2	291	1
2	292	7
2	293	1
2	294	2
2	295	7
2	296	1
2	89	12
2	297	1
2	90	5
2	298	1
2	299	1
2	300	1
2	301	1
2	302	1
2	303	1
2	91	1
2	304	8
2	305	1
2	306	1
2	307	1
2	308	3
2	309	2
2	310	1
2	311	1
2	312	1
2	313	9
2	314	1
2	315	1
2	316	3
2	317	5
3	318	9
3	319	1
3	94	1
3	320	1
3	1	2
3	321	1
3	322	1
3	323	1
3	324	1
3	5	11
3	97	1
3	325	1
3	6	3
3	326	1
3	99	2
3	327	1
3	328	1
3	100	13
3	9	14
3	10	1
3	329	1
3	330	2
3	331	1
3	332	1
3	333	2
3	334	1
3	335	2
3	336	1
3	14	1
3	15	1
3	337	2
3	17	2
3	338	8
3	103	1
3	339	1
3	104	30
3	340	24
3	341	5
3	106	1
3	342	1
3	343	2
3	344	3
3	345	2
3	346	1
3	347	1
3	348	1
3	349	2
3	350	1
3	351	2
3	352	1
3	112	2
3	113	1
3	353	1
3	114	113
3	354	1
3	355	1
3	21	1
3	356	1
3	357	1
3	358	1
3	359	1
3	119	3
3	360	1
3	361	1
3	120	2
3	362	31
3	363	8
3	364	1
3	365	1
3	124	4
3	366	1
3	127	1
3	128	3
3	129	1
3	367	1
3	132	6
3	368	1
3	369	1
3	26	4
3	370	2
3	133	11
3	371	1
3	372	3
3	27	1
3	373	1
3	374	4
3	137	1
3	375	3
3	376	2
3	139	1
3	377	4
3	378	1
3	379	1
3	380	2
3	381	2
3	382	1
3	383	1
3	384	1
3	30	1
3	385	1
3	141	2
3	33	1
3	386	2
3	387	3
3	388	2
3	389	1
3	390	1
3	391	1
3	392	32
3	393	1
3	394	2
3	395	3
3	143	4
3	144	1
3	396	1
3	397	1
3	398	1
3	399	1
3	146	1
3	147	1
3	400	3
3	401	1
3	402	1
3	152	32
3	403	30
3	404	1
3	405	3
3	42	20
3	406	1
3	43	2
3	153	3
3	407	1
3	408	8
3	409	1
3	410	1
3	411	1
3	412	2
3	159	10
3	413	2
3	45	2
3	414	1
3	415	56
3	160	2
3	416	3
3	46	14
3	417	1
3	161	3
3	418	1
3	162	1
3	419	1
3	420	1
3	421	1
3	163	9
3	422	1
3	423	1
3	424	1
3	47	3
3	164	1
3	425	2
3	426	1
3	427	1
3	48	15
3	428	10
3	429	15
3	430	3
3	431	6
3	432	1
3	433	2
3	434	7
3	435	1
3	170	10
3	436	1
3	437	3
3	49	1
3	50	2
3	438	1
3	439	1
3	440	1
3	441	1
3	51	13
3	442	1
3	443	2
3	444	4
3	445	1
3	446	8
3	447	4
3	448	1
3	449	1
3	450	2
3	451	3
3	452	1
3	52	2
3	453	1
3	174	7
3	176	3
3	454	2
3	455	1
3	177	6
3	456	1
3	457	1
3	458	5
3	179	5
3	181	1
3	53	10
3	459	2
3	460	1
3	461	1
3	54	5
3	462	1
3	183	2
3	463	2
3	464	5
3	184	2
3	465	1
3	185	6
3	466	13
3	467	3
3	55	1
3	468	1
3	469	1
3	470	4
3	471	1
3	56	12
3	190	1
3	191	6
3	472	1
3	473	1
3	57	5
3	474	1
3	475	1
3	476	1
3	477	1
3	192	1
3	478	1
3	479	3
3	480	2
3	481	1
3	482	3
3	483	1
3	484	3
3	194	12
3	485	2
3	58	3
3	486	1
3	487	1
3	59	1
3	488	4
3	489	1
3	490	3
3	491	1
3	492	12
3	198	2
3	199	2
3	493	2
3	494	11
3	495	3
3	496	1
3	497	2
3	203	22
3	498	1
3	204	7
3	499	1
3	205	1
3	500	2
3	501	1
3	502	1
3	503	1
3	504	1
3	505	1
3	506	1
3	507	1
3	508	1
3	509	1
3	510	1
3	511	1
3	207	1
3	512	1
3	513	1
3	209	38
3	514	1
3	210	3
3	211	5
3	515	2
3	516	1
3	517	2
3	518	1
3	214	21
3	519	3
3	520	1
3	218	23
3	219	6
3	220	1
3	63	65
3	64	8
3	65	1
3	521	1
3	221	2
3	522	2
3	523	1
3	222	1
3	223	5
3	224	14
3	524	5
3	525	1
3	226	3
3	228	1
3	526	1
3	527	1
3	229	3
3	230	3
3	528	1
3	529	5
3	530	8
3	531	1
3	532	1
3	533	1
3	534	1
3	232	4
3	69	4
3	70	173
3	233	5
3	535	3
3	536	1
3	234	5
3	537	1
3	538	2
3	235	3
3	236	2
3	237	2
3	539	1
3	540	1
3	541	1
3	239	22
3	542	1
3	240	1
3	73	6
3	543	1
3	544	2
3	545	2
3	242	1
3	546	1
3	243	4
3	547	2
3	244	1
3	548	7
3	549	2
3	550	1
3	245	1
3	246	5
3	247	1
3	551	1
3	552	7
3	248	5
3	553	4
3	554	1
3	555	2
3	556	1
3	557	1
3	558	5
3	75	1
3	559	1
3	249	1
3	560	1
3	561	1
3	250	1
3	562	2
3	252	1
3	253	1
3	254	6
3	563	1
3	564	1
3	565	2
3	566	1
3	567	1
3	568	1
3	569	2
3	570	1
3	571	1
3	572	1
3	573	1
3	574	2
3	575	1
3	576	2
3	577	1
3	578	2
3	579	1
3	257	1
3	80	41
3	580	1
3	581	1
3	582	1
3	583	1
3	259	1
3	261	3
3	584	1
3	263	2
3	264	1
3	585	1
3	586	2
3	266	4
3	587	1
3	268	1
3	588	3
3	589	1
3	270	1
3	590	1
3	591	2
3	272	8
3	273	6
3	592	1
3	593	2
3	594	2
3	595	1
3	596	2
3	597	2
3	279	1
3	280	4
3	281	6
3	282	1
3	598	1
3	599	2
3	600	1
3	284	1
3	601	2
3	602	1
3	603	87
3	604	1
3	605	1
3	606	2
3	607	1
3	288	1
3	608	1
3	609	1
3	610	1
3	611	1
3	612	2
3	613	1
3	614	1
3	615	1
3	290	3
3	616	1
3	292	1
3	617	1
3	618	2
3	619	1
3	620	1
3	621	1
3	622	1
3	623	4
3	295	3
3	624	1
3	625	1
3	89	5
3	626	2
3	627	1
3	628	1
3	629	1
3	630	2
3	631	14
3	632	1
3	633	5
3	90	1
3	634	1
3	635	1
3	301	1
3	636	1
3	637	10
3	638	1
3	91	2
3	639	1
3	640	1
3	304	9
3	641	1
3	305	1
3	642	1
3	643	1
3	644	1
3	645	2
3	646	3
3	647	1
3	648	14
3	649	2
3	650	1
3	308	1
3	309	4
3	651	2
3	652	1
3	653	1
3	311	1
3	654	1
3	655	1
3	656	1
3	657	1
3	658	2
3	659	1
3	660	14
3	661	1
3	662	1
3	663	1
3	664	6
3	665	1
3	666	1
3	667	1
3	668	1
3	669	1
3	670	1
3	671	1
3	672	1
3	673	1
3	674	1
3	675	1
3	676	2
3	677	1
3	678	1
3	679	1
3	680	6
3	681	1
3	682	3
3	683	1
3	684	1
3	685	1
3	686	1
3	687	1
3	688	1
3	689	1
3	690	1
3	691	1
3	692	1
3	317	4
3	693	1
4	694	1
4	695	1
4	318	6
4	696	2
4	319	2
4	1	1
4	697	3
4	322	1
4	3	1
4	698	1
4	699	1
4	700	2
4	5	8
4	701	2
4	96	9
4	6	2
4	702	1
4	98	1
4	703	1
4	99	4
4	704	1
4	705	1
4	327	1
4	706	1
4	9	27
4	329	7
4	330	1
4	707	1
4	331	1
4	335	2
4	708	1
4	15	1
4	16	1
4	337	17
4	709	1
4	17	3
4	338	6
4	339	3
4	104	2
4	710	7
4	340	10
4	711	1
4	712	1
4	341	1
4	106	2
4	342	1
4	344	10
4	346	1
4	347	3
4	348	1
4	713	1
4	714	3
4	20	4
4	351	1
4	715	2
4	111	1
4	114	5
4	716	1
4	21	1
4	717	1
4	718	1
4	719	1
4	357	1
4	720	2
4	721	1
4	722	1
4	723	1
4	724	3
4	725	1
4	119	1
4	726	1
4	727	1
4	728	1
4	361	6
4	120	1
4	729	1
4	362	5
4	363	8
4	730	3
4	731	1
4	23	2
4	128	4
4	732	1
4	733	1
4	131	1
4	734	1
4	735	1
4	736	1
4	132	2
4	737	2
4	738	1
4	133	5
4	739	3
4	740	1
4	371	4
4	27	1
4	741	2
4	373	1
4	374	7
4	138	1
4	375	2
4	376	3
4	377	5
4	742	1
4	743	4
4	378	3
4	744	2
4	381	1
4	745	1
4	382	1
4	28	1
4	383	3
4	746	3
4	385	1
4	747	1
4	748	1
4	749	1
4	33	1
4	750	1
4	751	1
4	386	1
4	752	1
4	387	4
4	753	1
4	754	1
4	388	3
4	389	1
4	392	5
4	393	2
4	395	1
4	755	3
4	143	1
4	756	3
4	757	1
4	758	1
4	144	1
4	759	1
4	760	1
4	761	1
4	762	2
4	763	2
4	764	1
4	765	5
4	147	1
4	766	1
4	767	2
4	768	1
4	769	1
4	770	2
4	771	1
4	400	14
4	772	4
4	773	1
4	774	1
4	38	1
4	775	1
4	401	2
4	402	1
4	152	12
4	403	2
4	776	1
4	777	1
4	405	2
4	42	2
4	778	2
4	779	1
4	780	1
4	781	1
4	410	3
4	782	7
4	783	1
4	411	1
4	159	10
4	413	2
4	784	1
4	785	1
4	415	18
4	416	5
4	46	2
4	161	36
4	419	3
4	420	5
4	786	1
4	787	1
4	163	2
4	788	1
4	789	1
4	47	2
4	425	1
4	165	3
4	790	1
4	426	12
4	48	4
4	428	7
4	429	2
4	432	4
4	791	1
4	792	2
4	793	1
4	794	1
4	434	1
4	795	1
4	796	1
4	168	3
4	797	1
4	435	7
4	170	1
4	436	1
4	437	1
4	50	1
4	798	1
4	439	1
4	799	1
4	444	2
4	800	3
4	446	34
4	801	1
4	447	2
4	802	5
4	174	1
4	803	2
4	804	1
4	805	1
4	806	1
4	177	2
4	456	2
4	179	1
4	807	1
4	808	1
4	809	1
4	810	7
4	181	1
4	53	3
4	460	1
4	811	6
4	812	6
4	461	1
4	813	1
4	183	3
4	464	6
4	465	13
4	185	10
4	466	11
4	467	2
4	187	2
4	814	1
4	815	1
4	468	4
4	816	1
4	817	1
4	470	16
4	818	4
4	471	2
4	56	2
4	190	3
4	819	1
4	191	5
4	472	1
4	820	1
4	821	1
4	822	1
4	474	1
4	475	12
4	476	2
4	823	1
4	824	1
4	192	1
4	825	1
4	481	6
4	482	3
4	483	1
4	484	1
4	826	10
4	827	4
4	828	1
4	58	1
4	829	1
4	830	1
4	831	2
4	59	1
4	490	2
4	492	8
4	832	3
4	198	2
4	833	3
4	834	1
4	835	1
4	836	1
4	837	1
4	200	4
4	838	1
4	494	16
4	839	2
4	840	1
4	841	1
4	842	1
4	203	2
4	498	1
4	204	3
4	843	1
4	844	1
4	505	1
4	845	1
4	507	1
4	846	2
4	847	1
4	511	7
4	207	3
4	848	1
4	849	1
4	850	2
4	851	2
4	209	9
4	514	1
4	852	1
4	516	1
4	853	2
4	854	1
4	855	1
4	856	1
4	857	1
4	858	3
4	859	1
4	860	1
4	214	1
4	519	5
4	861	5
4	862	1
4	218	6
4	65	1
4	222	2
4	223	7
4	224	2
4	226	2
4	228	1
4	229	1
4	863	2
4	864	1
4	865	1
4	529	1
4	530	4
4	67	1
4	866	3
4	867	1
4	868	1
4	532	3
4	869	2
4	870	2
4	232	48
4	70	7
4	535	4
4	234	1
4	537	1
4	871	1
4	235	3
4	872	1
4	873	1
4	237	2
4	874	1
4	875	1
4	876	3
4	539	1
4	877	3
4	878	1
4	879	6
4	880	1
4	881	3
4	239	6
4	882	1
4	883	1
4	240	1
4	884	1
4	73	4
4	885	1
4	886	1
4	543	1
4	887	1
4	545	1
4	888	1
4	889	1
4	242	1
4	546	6
4	243	1
4	890	1
4	547	28
4	244	1
4	891	1
4	892	1
4	893	1
4	246	1
4	552	2
4	894	1
4	895	1
4	248	1
4	896	2
4	556	1
4	558	4
4	560	3
4	897	1
4	898	1
4	899	1
4	254	4
4	900	1
4	901	1
4	902	50
4	903	1
4	904	1
4	566	1
4	905	2
4	569	1
4	570	3
4	906	1
4	574	2
4	907	1
4	575	1
4	908	2
4	576	6
4	909	5
4	910	1
4	911	1
4	579	1
4	912	1
4	80	35
4	580	1
4	913	4
4	914	2
4	915	1
4	586	4
4	916	3
4	266	1
4	917	1
4	588	1
4	589	2
4	918	1
4	919	1
4	270	1
4	920	1
4	921	2
4	922	1
4	923	2
4	924	1
4	590	1
4	272	4
4	273	11
4	593	2
4	925	1
4	926	1
4	277	1
4	281	2
4	282	1
4	927	1
4	928	3
4	929	7
4	930	1
4	931	4
4	932	1
4	933	1
4	934	5
4	935	1
4	601	2
4	936	1
4	937	1
4	603	8
4	285	2
4	938	1
4	939	3
4	940	1
4	608	8
4	941	2
4	942	1
4	943	1
4	944	2
4	612	1
4	945	1
4	946	1
4	947	1
4	948	1
4	949	1
4	290	1
4	950	1
4	951	1
4	952	1
4	953	2
4	954	1
4	955	16
4	618	2
4	956	1
4	957	1
4	620	1
4	958	1
4	626	11
4	959	1
4	960	1
4	961	1
4	629	1
4	630	21
4	631	26
4	962	1
4	633	2
4	90	2
4	963	1
4	299	1
4	964	1
4	965	1
4	966	1
4	967	9
4	637	6
4	638	1
4	968	1
4	969	1
4	970	1
4	91	3
4	971	1
4	972	1
4	640	2
4	304	1
4	973	2
4	645	2
4	974	1
4	975	1
4	976	1
4	977	2
4	978	1
4	648	1
4	979	1
4	309	2
4	980	1
4	981	1
4	652	1
4	982	1
4	983	1
4	984	1
4	985	2
4	986	1
4	311	1
4	987	1
4	988	1
4	989	2
4	990	2
4	991	1
4	992	1
4	656	5
4	657	1
4	993	1
4	994	1
4	660	7
4	995	1
4	996	1
4	997	4
4	664	6
4	998	1
4	999	1
4	1000	1
4	1001	1
4	1002	1
4	1003	1
4	1004	1
4	1005	1
4	1006	2
4	1007	2
4	1008	1
4	1009	2
4	1010	1
4	1011	1
4	686	2
4	687	1
4	688	1
4	1012	4
4	1013	3
4	691	1
4	1014	1
4	1015	1
5	1016	1
5	318	2
5	1017	1
5	319	3
5	1	1
5	1018	1
5	697	4
5	1019	1
5	1020	1
5	322	1
5	2	1
5	3	2
5	698	4
5	1021	2
5	1022	1
5	1023	1
5	1024	1
5	1025	1
5	700	6
5	5	1
5	701	1
5	96	5
5	1026	1
5	325	1
5	6	24
5	326	4
5	1027	1
5	702	2
5	703	5
5	1028	1
5	99	3
5	1029	1
5	1030	1
5	8	1
5	327	1
5	1031	1
5	100	4
5	1032	1
5	329	10
5	1033	1
5	1034	1
5	331	4
5	1035	1
5	1036	1
5	337	40
5	338	7
5	1037	1
5	1038	1
5	1039	4
5	104	5
5	340	3
5	1040	1
5	1041	2
5	711	1
5	1042	1
5	1043	2
5	341	3
5	1044	1
5	1045	1
5	108	1
5	1046	1
5	344	5
5	1047	2
5	347	1
5	1048	2
5	1049	1
5	714	8
5	20	2
5	1050	2
5	110	1
5	351	3
5	1051	1
5	1052	1
5	1053	1
5	353	22
5	1054	1
5	115	2
5	21	1
5	1055	1
5	1056	5
5	719	1
5	1057	1
5	1058	2
5	720	2
5	1059	1
5	1060	2
5	723	1
5	1061	2
5	358	1
5	1062	1
5	359	1
5	1063	1
5	1064	1
5	725	2
5	119	7
5	1065	1
5	1066	3
5	1067	1
5	1068	2
5	727	39
5	728	47
5	361	18
5	1069	1
5	729	6
5	363	48
5	1070	2
5	1071	1
5	1072	1
5	1073	1
5	1074	1
5	23	1
5	366	2
5	127	1
5	128	4
5	1075	1
5	1076	4
5	1077	2
5	732	2
5	130	1
5	1078	1
5	131	2
5	1079	1
5	1080	3
5	734	3
5	1081	1
5	1082	10
5	1083	3
5	132	6
5	368	2
5	369	1
5	737	2
5	25	1
5	26	2
5	1084	1
5	1085	2
5	370	2
5	738	4
5	133	5
5	1086	1
5	739	7
5	1087	1
5	1088	1
5	1089	1
5	371	3
5	1090	2
5	372	2
5	27	1
5	1091	1
5	373	10
5	374	3
5	138	4
5	375	6
5	376	3
5	1092	1
5	377	7
5	743	2
5	1093	1
5	378	2
5	744	2
5	379	1
5	1094	1
5	1095	1
5	1096	1
5	1097	1
5	381	5
5	745	4
5	1098	1
5	382	7
5	1099	3
5	28	1
5	1100	1
5	1101	1
5	1102	1
5	1103	2
5	385	1
5	747	5
5	1104	1
5	1105	2
5	748	1
5	1106	5
5	749	7
5	1107	1
5	1108	1
5	141	2
5	1109	1
5	386	1
5	1110	1
5	754	3
5	1111	1
5	1112	17
5	388	8
5	391	1
5	1113	1
5	1114	2
5	1115	1
5	392	3
5	1116	1
5	1117	7
5	143	1
5	756	1
5	757	1
5	1118	1
5	758	5
5	144	1
5	396	1
5	398	4
5	1119	1
5	1120	3
5	1121	1
5	762	2
5	1122	2
5	763	4
5	764	2
5	765	10
5	1123	1
5	146	4
5	766	4
5	1124	1
5	767	13
5	768	1
5	1125	1
5	770	3
5	1126	4
5	1127	3
5	1128	1
5	1129	1
5	400	16
5	1130	1
5	1131	1
5	1132	2
5	38	1
5	152	20
5	403	3
5	1133	1
5	1134	1
5	1135	1
5	1136	1
5	777	2
5	1137	1
5	1138	1
5	1139	1
5	405	1
5	42	3
5	1140	7
5	1141	1
5	778	2
5	1142	20
5	1143	1
5	1144	1
5	1145	1
5	1146	3
5	1147	2
5	781	3
5	1148	1
5	1149	4
5	410	7
5	782	1
5	783	4
5	1150	4
5	1151	6
5	159	5
5	413	2
5	1152	1
5	1153	3
5	1154	6
5	1155	1
5	1156	1
5	1157	2
5	1158	1
5	785	4
5	415	13
5	416	4
5	1159	1
5	46	2
5	417	2
5	161	4
5	419	1
5	1160	2
5	420	2
5	787	1
5	163	1
5	1161	1
5	1162	1
5	164	1
5	1163	1
5	165	1
5	790	4
5	426	42
5	48	4
5	1164	1
5	1165	1
5	1166	1
5	1167	1
5	1168	1
5	1169	1
5	428	6
5	429	3
5	432	5
5	1170	5
5	1171	2
5	1172	1
5	791	29
5	792	4
5	793	1
5	1173	1
5	1174	1
5	794	11
5	434	6
5	795	12
5	1175	1
5	796	2
5	168	9
5	1176	1
5	1177	2
5	1178	1
5	435	3
5	1179	1
5	436	2
5	437	7
5	49	1
5	50	1
5	1180	3
5	1181	1
5	1182	1
5	1183	1
5	1184	1
5	1185	1
5	440	1
5	441	3
5	51	1
5	1186	1
5	172	3
5	1187	1
5	800	2
5	446	29
5	1188	5
5	1189	5
5	801	3
5	447	10
5	1190	1
5	1191	1
5	1192	1
5	1193	1
5	1194	1
5	450	2
5	1195	1
5	1196	2
5	1197	4
5	1198	1
5	1199	3
5	1200	1
5	52	1
5	1201	1
5	1202	1
5	1203	1
5	1204	1
5	174	2
5	1205	1
5	1206	3
5	1207	1
5	177	2
5	456	1
5	1208	1
5	1209	1
5	1210	1
5	1211	2
5	458	2
5	807	2
5	809	1
5	810	37
5	460	2
5	811	8
5	812	5
5	54	2
5	182	1
5	1212	3
5	183	1
5	1213	1
5	1214	3
5	465	4
5	185	4
5	1215	2
5	1216	1
5	1217	1
5	1218	1
5	466	18
5	1219	1
5	467	1
5	1220	1
5	468	18
5	817	1
5	818	14
5	471	1
5	1221	2
5	1222	1
5	191	2
5	1223	3
5	472	4
5	1224	1
5	1225	2
5	1226	2
5	1227	6
5	1228	11
5	1229	3
5	821	1
5	1230	1
5	1231	1
5	475	3
5	1232	2
5	1233	3
5	1234	5
5	477	1
5	1235	3
5	1236	5
5	1237	1
5	1238	3
5	824	7
5	1239	1
5	1240	1
5	1241	2
5	1242	3
5	479	1
5	1243	1
5	480	1
5	481	4
5	193	1
5	1244	1
5	1245	1
5	482	6
5	1246	2
5	1247	1
5	1248	4
5	1249	1
5	1250	1
5	1251	1
5	826	4
5	827	5
5	828	3
5	1252	1
5	58	2
5	829	6
5	1253	4
5	830	1
5	59	2
5	1254	1
5	490	1
5	492	4
5	1255	1
5	1256	1
5	1257	1
5	1258	1
5	1259	1
5	832	16
5	1260	1
5	198	2
5	1261	1
5	833	3
5	493	2
5	837	2
5	200	3
5	838	2
5	494	7
5	839	2
5	1262	1
5	1263	2
5	1264	1
5	1265	1
5	1266	1
5	840	1
5	1267	2
5	496	4
5	1268	1
5	1269	1
5	1270	1
5	1271	2
5	1272	1
5	203	4
5	1273	1
5	843	3
5	501	1
5	1274	3
5	1275	1
5	1276	1
5	1277	2
5	845	2
5	1278	1
5	1279	1
5	1280	1
5	1281	2
5	1282	1
5	1283	5
5	1284	2
5	1285	2
5	1286	16
5	1287	2
5	1288	1
5	846	1
5	1289	2
5	1290	1
5	1291	1
5	1292	1
5	207	2
5	1293	1
5	1294	2
5	848	9
5	1295	1
5	1296	1
5	850	1
5	851	2
5	209	18
5	1297	1
5	210	1
5	853	1
5	1298	1
5	854	4
5	517	2
5	1299	1
5	1300	1
[truncated: 5,954 more rows]

## Sheet: EstSOutput
EstimateS (Version 9.1.0), Copyright R. K. Colwell: http://purl.oclc.org/estimates
Diversity Output from Input File: accumulation curve for rare (August 20, 2015)
Samples	Individuals (computed)	S(est)	S(est) 95% CI Lower Bound	S(est) 95% CI Upper Bound	S(est) SD	S Mean (runs)	Singletons Mean	Singletons SD (runs)	Doubletons Mean	Doubletons SD (runs)	Uniques Mean	Uniques SD (runs)	Duplicates Mean	Duplicates SD (runs)	ACE Mean	ACE SD (runs)	ICE Mean	ICE SD (runs)	Chao 1 Mean	Chao 1 95% CI Lower Bound	Chao 1 95% CI Upper Bound	Chao 1 SD (analytical)	Chao 2 Mean	Chao 2 95% CI Lower Bound	Chao 2 95% CI Upper Bound	Chao 2 SD (analytical)	Jack 1 Mean	Jack 1 SD (analytical)	Jack 2 Mean	Jack 2 SD (runs)	Bootstrap Mean	Bootstrap SD (runs)	MMRuns Mean	MMMeans (1 run)	Cole Rarefaction	Cole SD (analytical)	Alpha Mean	Alpha SD (analytical)	Shannon Mean	Shannon SD (runs)	Shannon Exponential Mean	Shannon Exponential SD (runs)	Simpson Inv Mean	Simpson Inv SD (runs)
1	168.05	48.78	46.96	50.59	0.93	56.24	35.34	90.79	8.45	23.27	56.24	150.73	0	0	134.28	343.96	56.24	150.73	132.88	102.03	220.94	26.45	56.24	88.91	89.07	0.03	56.24	0	0	0	56.24	150.73	0	0	127.35	9.98	0	0	0	0	0	0	0	0
2	336.1	96.69	93.14	100.23	1.81	88.84	56.04	96.58	13.54	24.88	88.57	161.39	0.27	1.1	223.31	365.81	14484.9	71322.9	217.59	160.37	383.1	49.69	8077.52	5387.72	17788.4	2643.29	133.13	37.69	133.13	242.25	110.98	201.91	152.36	5411.89	227.49	12.83	0	0	0	0	0	0	0	0
3	504.15	143.76	138.55	148.96	2.65	140.19	87.6	116.27	21.08	30.58	139.41	195.31	0.78	1.62	343.8	435.29	23275.9	69197.9	336.32	257	518.73	61.13	16563.7	0	0	0	233.13	79.47	279.47	390.92	181.53	253.56	214.06	5437.27	315	14.67	0	0	0	0	0	0	0	0
4	672.2	190.03	183.24	196.81	3.46	170.96	106.5	129.83	26.15	35	169.31	218.77	1.65	2.52	414.54	480.65	22312.7	65891.9	405.66	313.85	606.82	69.08	15018.1	7157.99	47540.6	8486.7	297.94	103.75	382.05	493.09	224.63	289.37	327.46	5462.53	393.91	16.04	0	0	0	0	0	0	0	0
5	840.25	235.52	227.22	243.82	4.24	213.01	132.39	149.7	32.39	40.29	209.13	249.62	3.83	7.93	518.22	552.69	20841.4	57699.9	501.39	395.34	720.14	77.36	15575.6	7986.36	44186	7743.63	380.31	131.03	504.07	601.74	281.84	336.56	793.93	5487.64	466.39	17.14	0	0	0	0	0	0	0	0
6	1008.29	280.27	270.52	290.03	4.98	267.62	165.73	166.63	41.14	45.37	260.74	275.93	6.74	12.9	640.92	611.84	19736	50857.7	615.23	498.67	825.31	79.61	14859.5	0	0	0	484.9	161.34	655.14	693.78	355.54	377.38	694.3	5512.62	533.81	18.05	0	0	0	0	0	0	0	0
7	1176.34	324.31	313.16	335.47	5.69	324.06	199.52	179.69	49.87	48.97	313.81	296.78	9.72	15.88	767.98	659.95	19689.7	49629.1	736.9	607.16	955.47	85.76	15548.6	0	0	0	593.04	195.61	811.4	767.43	431.66	408.56	749.91	5537.44	597.1	18.84	0	0	0	0	0	0	0	0
8	1344.39	367.66	355.17	380.16	6.37	364.31	222.21	201.9	55.94	56.57	342.27	315.39	19.92	52.11	851.61	740.72	16521.2	40531.2	819.08	682.52	1037.23	88.05	12838.5	5081.39	39848.4	7607.39	663.8	204.45	907.69	843.93	483.96	465.86	699.75	5562.13	656.96	19.52	0	0	0	0	0	0	0	0
9	1512.44	410.35	396.57	424.14	7.03	398.47	243.28	210.26	61.24	58.51	371.43	323.01	24.15	57.59	933.14	775.27	11811.3	22125.2	894.18	750.17	1116.35	91.3	9520.5	4655.31	22453	4101.98	728.63	219.86	1001.08	879.59	529.73	485.4	1481.36	5586.66	713.88	20.13	0	0	0	0	0	0	0	0
10	1680.49	452.4	437.37	467.44	7.67	424.24	258.54	206.92	65.27	57.78	393.82	317.52	27.1	57.22	992.76	762.41	9408.54	16525.5	947.29	798.73	1169.72	92.83	7777.81	3959.75	17511.9	3146.61	778.68	228.89	1074.46	874.56	564.56	479.59	3756.13	5611.03	768.27	20.67	0	0	0	0	0	0	0	0
11	1848.54	493.84	477.6	510.07	8.28	483.47	293.07	215.21	74.56	60.31	447.96	334.06	31.46	57.88	1121.14	787.28	9421.11	14513.3	1069.95	911.29	1300.11	97.61	7897.81	4332.6	16150.2	2788.92	890.71	267.36	1234.05	927.02	644.05	501.86	1290.24	5635.26	820.42	21.17	0	0	0	0	0	0	0	0
12	2016.59	534.67	517.27	552.07	8.88	536.95	323.67	226.86	83.1	64.12	495.1	351.54	36.78	59.78	1232.27	830.16	8934.18	13750.4	1177.67	1011.27	1413.47	101.19	7614.98	4450.72	14233.8	2351.15	990.79	292.54	1375.51	982.53	715.5	528.79	1492.78	5659.33	870.6	21.62	0	0	0	0	0	0	0	0
13	2184.64	574.93	556.41	593.46	9.45	588.32	351.23	240.65	91.31	68.38	532.01	364.88	48.74	68.72	1335.21	881.38	7060.39	8724.11	1273.51	1101.8	1512.81	103.54	6223.2	3948.03	10536	1605.45	1079.41	301.26	1491.76	1030.69	782.04	563.28	6773.98	5683.23	919.01	22.02	0	0	0	0	0	0	0	0
14	2352.69	614.64	595.03	634.25	10.01	612.65	364.64	248.85	95.5	71.81	548.63	375.89	54.09	72.2	1385.91	910.97	6291.68	8234.39	1319.35	1144.86	1561.14	104.92	5741.05	3709.59	9668.18	1446.77	1122.09	301.66	1549.55	1070.1	813.61	586.28	1764.99	5706.98	965.82	22.4	0	0	0	0	0	0	0	0
15	2520.74	653.81	633.14	674.48	10.54	652.37	387.21	246.46	102.07	70.86	581.9	372.79	59.46	72.79	1467.47	901.29	6486.08	8854.54	1397.39	1217.75	1643.11	107.31	6088.45	3955.05	10304.3	1534.01	1195.48	321.91	1651.94	1066.34	866.39	581.64	1737.7	5730.57	1011.18	22.75	0	0	0	0	0	0	0	0
16	2688.79	692.46	670.77	714.15	11.07	689.64	408.12	247.22	107.96	71.19	612.1	371.65	64.66	73.46	1546.33	904.66	5886.19	6441.9	1470.1	1286.16	1718.44	109.17	5281.28	3754.42	7729.97	989.61	1263.48	332.78	1746.27	1069.14	915.63	583.91	7945.69	5754	1055.2	23.07	0	0	0	0	0	0	0	0
17	2856.83	730.6	707.92	753.29	11.57	726.63	429.08	245.07	113.82	70.76	643.27	367.28	69.02	73.77	1622.13	898.02	5960.13	6511.9	1543.75	1355.03	1795.8	111.41	5400.4	3887.86	7790.22	972.78	1332.06	350.16	1842.56	1060.49	964.82	578.28	5719.44	5777.26	1098	23.36	0	0	0	0	0	0	0	0
18	3024.88	768.26	744.61	791.91	12.07	761.95	449.63	241.38	119.13	69.86	670.98	360.47	74.88	74.2	1699	886.44	5871.46	6326.78	1618.77	1424.1	1876.4	114.4	5347.34	3905.05	7591.9	920.46	1395.65	361.48	1929.44	1044.99	1011.28	570.7	3056.32	5800.36	1139.67	23.64	0	0	0	0	0	0	0	0
19	3192.93	805.44	780.85	830.03	12.54	800.14	469.92	237.35	125.78	69.04	699.44	354.68	82.89	76.68	1772.06	869.46	5686.03	5920.22	1686.74	1488.81	1946.69	115.87	5225.1	3896	7242.51	837.39	1462.77	372.92	2018.54	1031.27	1061.13	563.41	2297.69	5823.3	1180.29	23.9	0	0	0	0	0	0	0	0
20	3360.98	842.16	816.66	867.66	13.01	865.56	506.3	250.99	136.05	73.26	753.31	376.31	91.32	78.61	1901.99	919.51	5732.89	5480.51	1816.75	1611.39	2083.75	119.6	5268.94	4023.84	7108.7	773.65	1581.2	399.35	2181.32	1096.64	1147.41	597.14	2710.07	5846.07	1219.92	24.13	0	0	0	0	0	0	0	0
21	3529.03	878.44	852.05	904.83	13.46	906.8	529.28	251.33	142.93	73.69	784.78	376.57	98.16	79.25	1985.95	919.97	5383.2	3983.02	1896.26	1686.54	2167.13	121.73	4973.85	3928.37	6440.1	632.64	1654.21	411.68	2279.88	1101.34	1201.27	600.75	4484.43	5868.68	1258.64	24.36	0	0	0	0	0	0	0	0
22	3697.08	914.29	887.03	941.54	13.91	946.93	551.42	256.48	149.32	75.97	814	383.17	106	82.68	2067.39	938.11	5233.22	3246.09	1974.7	1760.55	2249.91	123.99	4833.99	3885.31	6137.42	568.05	1723.93	423.14	2372.16	1124.55	1253.35	616.29	1956.66	5891.13	1296.5	24.56	0	0	0	0	0	0	0	0
23	3865.13	949.71	921.61	977.81	14.34	967.73	563.36	252.17	152.61	74.43	828.97	375.67	109.58	81.99	2111.89	922.46	5207.79	3100.31	2017.57	1800.72	2295.05	125.28	4824.4	3900.32	6083.96	551.08	1760.66	426.96	2422.04	1105.16	1280.42	605.83	3534.8	5913.41	1333.54	24.76	0	0	0	0	0	0	0	0
24	4033.18	984.73	955.8	1013.66	14.76	1024.65	595.63	245.35	161.84	73.37	874.72	364.16	118.26	84.98	2227.7	896.05	5468.11	3367.14	2130.62	1906.84	2414.8	128.79	5083.04	4131.11	6363.35	563.97	1862.92	447.01	2561.06	1073.41	1355.32	590.45	2591.3	5935.53	1369.83	24.94	0	0	0	0	0	0	0	0
25	4201.23	1019.35	989.61	1049.08	15.17	1067.2	619.82	241.39	168.71	73.08	910.01	359.35	123.69	84.24	2316.86	878.62	5563.4	3289.17	2215.61	1986.87	2504.56	131.3	5179.55	4247	6414.75	548.27	1940.81	467	2668.97	1061.25	1411.66	583.52	2565.34	5957.48	1405.38	25.11	0	0	0	0	0	0	0	0
26	4369.28	1053.58	1023.05	1084.1	15.57	1095.98	636.22	241.55	173.32	73.44	932.71	360.04	127.47	83.94	2378.27	879.46	5590.43	3208.77	2273.54	2041.5	2565.74	132.98	5234.81	4316.66	6441.27	537.62	1992.82	472.37	2740.82	1064.19	1449.5	583.61	2170.99	5979.28	1440.25	25.27	0	0	0	0	0	0	0	0
27	4537.33	1087.43	1056.14	1118.73	15.97	1133.54	656.46	241.58	179.42	72.99	960.21	359.78	133.57	84.15	2452.39	879.25	5616.22	3123.21	2344.04	2109.01	2638.64	134.38	5266.67	4369.01	6438.48	523.87	2058.19	481.16	2828.35	1066.2	1498.2	585.81	3449.74	6000.91	1474.47	25.42	0	0	0	0	0	0	0	0
28	4705.37	1120.92	1088.88	1152.97	16.35	1152.18	666.11	244	182.81	73.91	971.05	362.85	138.8	85.01	2485.66	886.87	5536.36	3086.4	2374.77	2139.18	2669.44	134.55	5192.87	4328.44	6317.07	503.5	2088.55	480.89	2866.13	1077.68	1521.78	592.55	2212.75	6022.37	1508.07	25.56	0	0	0	0	0	0	0	0
29	4873.42	1154.05	1121.27	1186.84	16.73	1172.92	677.42	245.17	185.51	74.5	983.41	362.69	143.87	86.36	2526.89	890.42	5472.45	3001.75	2418.58	2180.18	2716.17	136.02	5123.51	4296.04	6191.46	480.12	2122.42	480.1	2908.84	1079.71	1548.01	595.83	2583.39	6043.68	1541.08	25.69	0	0	0	0	0	0	0	0
30	5041.47	1186.84	1153.33	1220.35	17.1	1203.27	693.78	250.24	190.8	76.27	1004.31	369.2	150	89.29	2586.46	907.65	5462.76	2787.33	2472.78	2232.56	2771.81	136.87	5118.9	4316.64	6146.78	463.77	2174.1	482.78	2976.29	1101.02	1587.06	609.41	438814	6064.83	1573.52	25.81	0	0	0	0	0	0	0	0
31	5209.52	1219.28	1185.07	1253.5	17.46	1224.74	704.96	252.42	194.56	77.34	1018.86	370.81	154.01	90.7	2626.94	916.06	5477.57	2723.08	2510.15	2268.76	2810.05	137.4	5129.48	4338.79	6138.94	456.26	2210.73	485.95	3024.59	1109.17	1614.64	616.23	3811.82	6085.82	1605.42	25.92	0	0	0	0	0	0	0	0
32	5377.57	1251.4	1216.49	1286.31	17.81	1256.18	720.9	251.42	199.3	77.47	1037.2	367.99	162.81	91.96	2684.62	911.6	5308.08	2387.48	2568.49	2324.43	2870.85	138.72	4987.58	4256.89	5911.07	419.49	2260.97	486.4	3085.63	1102.51	1654.22	614.98	3328.84	6106.65	1636.81	26.03	0	0	0	0	0	0	0	0
33	5545.62	1283.19	1247.6	1318.78	18.16	1313.92	752.6	242.12	208.68	75.88	1083.11	351.98	169.79	92.05	2801.04	876.84	5549.93	2376.95	2680.06	2430.26	2987.98	141.62	5207.56	4458.77	6147.55	428.43	2364.21	511.18	3227.16	1057.54	1729.86	594.45	2875.69	6127.32	1667.69	26.12	0	0	0	0	0	0	0	0
34	5713.67	1314.66	1278.4	1350.92	18.5	1339.15	766.46	236.32	212.55	74.89	1101.05	342.81	173.93	92.13	2852.02	850.55	5599.27	2299.93	2730.81	2478.04	3041.71	143.15	5253.66	4510.05	6182.95	424.51	2407.82	518.12	3285.36	1032.45	1762.45	582.95	4860.07	6147.84	1698.11	26.21	0	0	0	0	0	0	0	0
35	5881.72	1345.83	1308.91	1382.74	18.83	1374.63	784.07	228.65	219.12	73.97	1123.76	328.96	181.68	93.15	2913.98	821.78	5625.65	2224.58	2787.18	2533.22	3098.55	143.59	5275.12	4543.4	6186.11	416.93	2466.28	523.31	3359.57	995.01	1807.52	568.26	5412.72	6168.2	1728.06	26.3	0	0	0	0	0	0	0	0
36	6049.77	1376.69	1339.14	1414.25	19.16	1402.23	798.23	229.61	223.57	75.1	1141.79	327.25	186.91	95.23	2964.52	824.24	5663.27	2162.26	2837.5	2581.43	3150.84	144.64	5311.81	4587.36	6210.3	411.99	2512.3	529.44	3419.18	993.65	1842.66	571.34	8426.58	6188.41	1757.57	26.38	0	0	0	0	0	0	0	0
37	6217.82	1407.27	1369.07	1445.46	19.49	1420.28	807.21	236.5	226.9	77.7	1151.36	333.74	191.12	98.41	2996.68	848.77	5654.63	2149.34	2866.91	2610.24	3180.66	144.91	5303.42	4590.01	6186.4	405.29	2540.52	529.47	3453.88	1018.67	1865.06	589.84	6707.38	6208.46	1786.66	26.45	0	0	0	0	0	0	0	0
38	6385.87	1437.55	1398.74	1476.36	19.8	1455.91	825.64	237.88	233.23	79.26	1175.19	335	198.34	101.37	3063.24	852.41	5719.57	2140.41	2928.48	2669.84	3243.89	145.84	5366.4	4656.68	6242.09	402.56	2600.17	535.17	3530.69	1023.82	1910.6	595.09	5051.62	6228.37	1815.35	26.52	0	0	0	0	0	0	0	0
39	6553.91	1467.55	1428.13	1506.98	20.11	1486.37	841.31	241.35	238.51	80.54	1194.08	339.84	205.21	101.78	3118.81	864.27	5701.18	2057.57	2981.53	2721.33	3298.17	146.56	5347.84	4660.07	6192.46	389.18	2649.83	534.65	3593.11	1039.81	1949.13	604	3838.22	6248.12	1843.63	26.58	0	0	0	0	0	0	0	0
40	6721.96	1497.28	1457.25	1537.31	20.42	1520.24	857.53	238.36	244.66	80.48	1215.32	332.11	212.18	103.83	3175.15	852.69	5737.51	1998.92	3034.08	2772.98	3351.13	146.91	5378.24	4701.11	6206.37	382.36	2705.18	540.24	3663.33	1020.13	1991.96	598.14	3416.61	6267.73	1871.54	26.63	0	0	0	0	0	0	0	0
41	6890.01	1526.74	1486.12	1567.36	20.72	1539.33	867.25	238.18	248	79.9	1227.52	331.58	215.58	103.72	3210.31	854.29	5736.64	1869.25	3065.54	2803.98	3382.66	147.06	5378.47	4714.54	6187.02	374.11	2736.91	541.17	3704.61	1019.75	2016.18	597.99	3185.92	6287.19	1899.08	26.68	0	0	0	0	0	0	0	0
42	7058.06	1555.93	1514.73	1597.13	21.02	1559.64	876.82	239.58	251.37	80.91	1238.11	332.8	219.43	104.96	3244.7	859.98	5751.28	1864.43	3098.88	2836.41	3416.73	147.48	5392.46	4734.07	6193.12	370.72	2768.27	542.24	3743.54	1025.32	2041.17	603.28	3140.21	6306.5	1926.26	26.73	0	0	0	0	0	0	0	0
43	7226.11	1584.87	1543.09	1626.64	21.31	1588.11	891.18	244.1	255.83	82.76	1254.15	338.53	227.04	106.03	3297.48	875.52	5719.98	1786.75	3150.94	2886.38	3470.9	148.55	5347.38	4712.22	6117.03	356.99	2813.09	544.53	3797.59	1043.68	2076.76	614.78	3152.14	6325.67	1953.1	26.77	0	0	0	0	0	0	0	0
44	7394.16	1613.55	1571.21	1655.89	21.6	1614.23	904.33	240.5	259.9	82.06	1269.32	334.35	233.29	105.93	3344.99	861.83	5733.03	1764.57	3198.08	2931.64	3519.81	149.49	5359.61	4732.76	6117.61	351.95	2854.7	547.4	3848.82	1031.46	2109.51	608.26	6053.98	6344.7	1979.6	26.8	0	0	0	0	0	0	0	0
45	7562.21	1641.99	1599.09	1684.89	21.89	1656.86	926.29	229.86	267.23	79.26	1298.01	314.71	240.64	106.44	3424.05	826.84	5839.36	1660.28	3272.55	3003.68	3596.3	150.64	5447.27	4820.24	6203.32	351.54	2926.03	561.79	3941.63	974.68	2163.85	583.25	4550.26	6363.58	2005.78	26.84	0	0	0	0	0	0	0	0
46	7730.26	1670.18	1626.74	1713.63	22.17	1689.57	942.4	233.28	272.93	81.14	1319.54	317.88	247.09	108.32	3480.2	839.5	5896.21	1633.14	3326.49	3056.32	3651.27	151.24	5488.33	4866.88	6236	348.02	2980.42	568.45	4011.5	988.45	2205.5	594.89	4780.08	6382.33	2031.64	26.86	0	0	0	0	0	0	0	0
47	7898.31	1698.14	1654.15	1742.12	22.44	1703.46	949.15	231.65	275.12	80.36	1327.34	316.05	250.26	107.08	3505.45	833.79	5889.23	1597.75	3349.88	3079.14	3675.08	151.5	5480.63	4867.91	6216.28	342.77	3002.56	568.33	4039.01	983.61	2222.86	591.29	5536.69	6400.93	2057.2	26.89	0	0	0	0	0	0	0	0
48	8066.36	1725.86	1681.34	1770.38	22.71	1740.5	967.85	224.43	280.9	78.81	1352.67	303.33	257.5	105.33	3570.81	809.75	5944.74	1517.29	3417.24	3143.82	3744.99	152.84	5525.17	4920.06	6249.26	337.94	3064.99	578.24	4119.78	947.66	2270.33	573.87	4787.27	6419.4	2082.47	26.91	0	0	0	0	0	0	0	0
49	8234.4	1753.35	1708.3	1798.4	22.98	1762.35	978.39	225.05	284.8	79.22	1365.45	303.57	262.36	105.02	3609.11	811.34	5936.24	1455.96	3452.56	3178.44	3780.76	153.14	5518.69	4925.17	6227.03	331.03	3099.93	578.77	4163.24	949.79	2297.73	575.57	13019.7	6437.74	2107.45	26.92	0	0	0	0	0	0	0	0
50	8402.45	1780.62	1735.05	1826.18	23.25	1781.56	988.87	220.26	287.84	77.59	1378.1	296.66	265.8	103.95	3648.33	795.76	5979.77	1437.43	3489.83	3214.13	3819.53	153.93	5555.01	4962.56	6261.01	330.18	3132.1	581.72	4205.11	928.44	2322.22	563.27	7012.07	6455.94	2132.14	26.93	0	0	0	0	0	0	0	0
51	8570.5	1807.66	1761.59	1853.74	23.51	1823.68	1011.17	214.39	295.55	75.93	1407.9	287.37	273.01	103.48	3730.02	774.28	6100.31	1401.64	3562.76	3285.08	3894.03	154.85	5660.8	5064.44	6369.98	332.01	3203.97	591.84	4299.6	901.71	2376.4	550.11	6270.28	6474	2156.57	26.94	0	0	0	0	0	0	0	0
52	8738.55	1834.5	1787.91	1881.08	23.77	1856.94	1026.65	216.13	301.54	77.16	1428.31	289.62	279.88	103.09	3784.05	781.91	6128.27	1371.5	3614.6	3336.05	3946.44	155.22	5684.14	5098.02	6378.94	325.79	3257.78	592.35	4367.32	910.73	2418.29	555.02	8573.2	6491.94	2180.73	26.94	0	0	0	0	0	0	0	0
53	8906.6	1861.11	1814.03	1908.2	24.02	1885.11	1039.31	219.81	307.1	77.93	1441.64	291.44	287.83	104.65	3828.84	797.16	6116.32	1342.35	3652.29	3374.22	3983.12	154.85	5669.08	5094.96	6348.47	318.83	3299.55	590.77	4415.15	918.56	2452.69	561.86	7931.43	6509.74	2204.63	26.94	0	0	0	0	0	0	0	0
54	9074.65	1887.52	1839.95	1935.1	24.27	1915.66	1053.23	217	312.91	76.89	1458.3	288.87	295.53	102.83	3878.65	785.98	6125.19	1326.79	3696.86	3418.52	4027.55	154.89	5675.73	5111.41	6342.16	313.07	3346.95	593.17	4472.03	910.52	2490.63	555.29	7682.35	6527.42	2228.29	26.94	0	0	0	0	0	0	0	0
55	9242.7	1913.73	1865.67	1961.79	24.52	1939.41	1064.66	216.91	316.88	76.9	1471.14	288.56	301.35	102.86	3920.79	785.1	6144.37	1307.76	3736.2	3456.9	4067.68	155.34	5682.31	5125.36	6338.89	308.71	3383.8	594.7	4516.43	910.23	2520.08	555.53	8268.07	6544.97	2251.69	26.93	0	0	0	0	0	0	0	0
56	9410.75	1939.73	1891.19	1988.28	24.77	1967	1078.41	208.06	321.94	74.29	1489.38	273.23	306.29	102.53	3968.39	752.35	6214.47	1233.47	3781.33	3501	4113.54	155.8	5742.18	5183.72	6399.66	309.34	3429.78	602.04	4575.99	865.96	2555.2	534.87	7422.91	6562.4	2274.86	26.92	0	0	0	0	0	0	0	0
57	9578.8	1965.54	1916.52	2014.56	25.01	1979.88	1084.47	206.72	324.2	73.51	1495.87	272.12	309.21	101.58	3990.22	746.96	6217.1	1226.71	3801.65	3521.01	4134.02	155.92	5743.8	5190.14	6394.87	306.5	3449.51	601.89	4599.86	861.65	2571.04	530.68	16038.3	6579.7	2297.8	26.91	0	0	0	0	0	0	0	0
58	9746.85	1991.15	1941.66	2040.64	25.25	2007.34	1098.06	205.21	329.19	73.47	1513.6	272.63	314.95	99.34	4037.6	740.45	6255.2	1227.73	3846.76	3565.11	4179.94	156.39	5771.49	5223.7	6414.32	302.93	3494.84	605.67	4657.5	861.52	2605.94	527.1	7511.01	6596.88	2320.51	26.89	0	0	0	0	0	0	0	0
59	9914.9	2016.57	1966.61	2066.53	25.49	2042.57	1115.34	198.58	335.2	71.63	1535.64	264.67	322.42	96.01	4098.35	717.4	6311.04	1213.97	3905.95	3622.72	4240.5	157.15	5812.83	5270.61	6447.64	299.5	3552.18	611.78	4729.65	836.06	2650.46	509.89	10615.7	6613.94	2342.99	26.88	0	0	0	0	0	0	0	0
60	10082.9	2041.8	1991.38	2092.22	25.72	2052.8	1119.81	197.54	337.19	71.48	1539.72	263.58	325.32	95.93	4113.2	713.77	6315.67	1208.68	3920.43	3637.14	4254.92	157.15	5808.38	5269.91	6438.45	297.34	3566.86	611.18	4746.11	833.05	2662.75	508.36	23019.7	6630.88	2365.26	26.85	0	0	0	0	0	0	0	0
61	10251	2066.85	2015.98	2117.73	25.96	2081.82	1133.49	199.73	342.27	71.89	1554.67	265.5	333.93	96.2	4161.67	720.79	6323.84	1181.55	3966.69	3682.55	4301.83	157.54	5800.18	5271.9	6417.39	291.49	3611	610.21	4797.1	838.9	2698.61	512.24	25055.3	6647.7	2387.32	26.83	0	0	0	0	0	0	0	0
62	10419	2091.72	2040.39	2143.04	26.19	2110.35	1146.82	200.33	347.33	72.2	1573.39	267.92	338.98	95.29	4208.16	723.68	6386	1183.37	4011.42	3726.51	4347.1	157.88	5847.92	5321.88	6461.43	289.99	3658.36	614.88	4858.33	846.01	2734.85	514.35	17433.4	6664.4	2409.17	26.8	0	0	0	0	0	0	0	0
63	10587.1	2116.41	2064.63	2168.18	26.41	2127.97	1155.16	201.21	350.39	72.38	1582.05	268.92	342.97	94.37	4237.21	727.35	6403.51	1176.72	4039.72	3754.24	4375.86	158.14	5850.87	5330.16	6457.44	286.88	3684.91	613.18	4890.01	849.13	2756.38	515.15	16724.9	6680.99	2430.82	26.77	0	0	0	0	0	0	0	0
64	10755.1	2140.92	2088.7	2193.13	26.64	2147.14	1162.86	203.92	353.89	74.06	1589.85	271.53	347.57	96.04	4262.94	735.71	6414.07	1169.11	4065.73	3780.23	4401.7	158.11	5857.25	5340.51	6458.77	284.59	3712.15	612.49	4920.95	861.44	2779.26	525.88	16817.9	6697.47	2452.27	26.73	0	0	0	0	0	0	0	0
65	10923.2	2165.26	2112.6	2217.91	26.86	2187.33	1181.99	198.35	360.48	72.62	1615.63	262.33	354.96	95.49	4331.06	712.01	6503.42	1127.91	4133.21	3845.85	4470.86	159.02	5932.95	5416	6533.75	284.48	3778.1	620.55	5005.36	834.36	2830.13	513.38	25154.5	6713.83	2473.53	26.7	0	0	0	0	0	0	0	0
66	11091.2	2189.42	2136.34	2242.51	27.08	2213.79	1194.65	195.51	364.78	72.96	1631.27	257.02	360.45	96.72	4377.06	700.39	6549.42	1102.72	4178.08	3889.35	4517.05	159.71	5972	5456.22	6570.86	283.7	3820.34	624.83	5058.03	820.82	2863.26	509.89	15970.9	6730.08	2494.6	26.66	0	0	0	0	0	0	0	0
67	11259.3	2213.43	2159.91	2266.94	27.3	2232.36	1203.04	195.48	368.22	72.95	1641	255.38	364.28	97.55	4406.67	698.98	6579.28	1073.4	4205.33	3916.37	4544.35	159.78	5993.74	5479.32	6590.71	282.87	3848.87	625.74	5092.83	818.65	2886.11	511.6	16235.6	6746.22	2515.49	26.61	0	0	0	0	0	0	0	0
68	11427.3	2237.26	2183.32	2291.2	27.52	2251.32	1211.43	199.21	371.48	74.5	1649.31	258.97	369	99.74	4436.2	713.2	6587.35	1072.17	4234.39	3944.95	4573.78	160	6004.69	5493.14	6598.02	281.22	3876.38	624.96	5124.37	831.72	2908.98	521.49	8312.86	6762.25	2536.19	26.57	0	0	0	0	0	0	0	0
69	11595.4	2260.93	2206.57	2315.29	27.73	2264.24	1216.9	201.42	373.7	75.78	1654.46	260.7	371.91	101.68	4455.61	721.36	6599.73	1077.25	4253.45	3963.76	4593.01	160.11	6016.14	5505.8	6607.88	280.51	3894.72	624	5145.41	839.32	2924.37	528.38	7052.59	6778.18	2556.71	26.52	0	0	0	0	0	0	0	0
70	11763.4	2284.45	2229.67	2339.23	27.95	2292.68	1229.42	197.93	378.97	74.7	1668.25	254.6	378.58	101.32	4502.71	709.22	6634.98	1059.23	4294.51	4004.51	4634.11	160.2	6039.88	5533.17	6626.82	278.37	3937.1	624.02	5195.25	822.98	2959	521.61	6477.82	6794	2577.06	26.47	0	0	0	0	0	0	0	0
71	11931.5	2307.8	2252.61	2363	28.16	2320.18	1242	195.04	383.71	74.95	1683.63	251.23	384.51	101.13	4546.18	697.45	6672.89	1044.61	4338.13	4047.16	4678.58	160.67	6074.17	5569.75	6657.85	276.97	3980.1	625.97	5247.96	813.14	2993.14	517.36	32683	6809.72	2597.24	26.42	0	0	0	0	0	0	0	0
72	12099.5	2331	2275.4	2386.61	28.37	2337.52	1250.52	194.99	386.19	75.24	1692	251.57	388.5	101.08	4577.58	696.72	6696.76	1036.97	4370.01	4077.83	4711.69	161.29	6086.66	5584.81	6667	275.47	4006.02	624.8	5278.63	814.05	3014.27	517.96	14527.9	6825.33	2617.26	26.36	0	0	0	0	0	0	0	0
73	12267.6	2354.05	2298.04	2410.06	28.58	2357	1258.99	196.56	389.73	75.71	1701.41	253.69	393.22	100.25	4606.9	702.65	6708.45	1021.41	4398.44	4106.01	4740.2	161.38	6094.56	5596.73	6669.8	273.16	4035.1	623.69	5312.76	820.93	3038.03	521.25	21932.9	6840.84	2637.1	26.3	0	0	0	0	0	0	0	0
74	12435.6	2376.95	2320.53	2433.36	28.78	2375.77	1268.46	192.18	392.7	74.22	1712.63	246.93	397.08	99.1	4642.2	685.38	6745.45	995.91	4432.37	4138.79	4775.26	161.97	6124.52	5627.12	6698.89	272.83	4065.26	627.38	5350.54	800.69	3061.58	510.55	11116.6	6856.25	2656.79	26.24	0	0	0	0	0	0	0	0
75	12603.7	2399.7	2342.88	2456.51	28.99	2389.77	1274.88	192	395.21	74.44	1719.22	246.79	400.75	99.28	4663.1	685.55	6754.35	983.95	4454.14	4160.18	4797.32	162.14	6131.38	5636.49	6702.57	271.38	4086.07	626.4	5374.65	800.58	3078.65	510.9	9075.77	6871.56	2676.32	26.18	0	0	0	0	0	0	0	0
76	12771.7	2422.3	2365.09	2479.51	29.19	2409.92	1283.45	193.4	399.29	75.59	1728.03	248.61	406.39	99.93	4691.39	688.76	6759.3	981.05	4480.82	4186.98	4823.66	162.02	6131.88	5642.14	6696.66	268.45	4115.21	624.76	5407.35	807.12	3102.99	515.17	13392.5	6886.77	2695.7	26.11	0	0	0	0	0	0	0	0
77	12939.8	2444.75	2387.15	2502.36	29.39	2436.99	1296.21	197.93	403.13	76.31	1740.35	252.09	413.31	102.54	4739.71	705.14	6781.11	976.71	4528.91	4233.5	4873.31	162.82	6148.96	5662.98	6708.97	266.29	4154.74	622.74	5452.61	819.26	3135.75	525.57	12597.3	6901.88	2714.92	26.04	0	0	0	0	0	0	0	0
78	13107.8	2467.07	2409.07	2525.07	29.59	2459.44	1305.44	195.18	407.07	75.23	1750.43	250.96	419.12	99.37	4771.15	694.6	6776.64	967.94	4560.39	4264.82	4904.73	162.85	6149.69	5669.76	6702.11	262.82	4187.43	620.95	5489.91	812.84	3162.9	517.55	9820.64	6916.9	2733.99	25.97	0	0	0	0	0	0	0	0
79	13275.9	2489.24	2430.86	2547.63	29.79	2468.14	1309.27	195.84	408.44	75.29	1754.43	251.57	421.09	99.2	4784.48	696.61	6789.82	967.34	4574.22	4278.37	4918.82	162.99	6156.58	5677.73	6707.61	262.19	4200.36	620.56	5505.21	815.28	3173.46	518.96	8675.22	6931.83	2752.92	25.9	0	0	0	0	0	0	0	0
80	13443.9	2511.28	2452.51	2570.05	29.99	2502.83	1325.11	192.87	414.33	75.46	1773.22	249.26	429.36	97.62	4840.18	684.32	6835.21	965.8	4629.89	4332.75	4975.66	163.62	6192.41	5717.17	6738.59	260.05	4253.88	621.19	5569.45	806.15	3216.37	511.48	8055.23	6946.66	2771.7	25.82	0	0	0	0	0	0	0	0
81	13612	2533.18	2474.03	2592.33	30.18	2533.3	1338.78	192	419.99	73.95	1787.98	248.98	437.55	95.62	4887.62	681.56	6861.21	969.23	4674.34	4376.93	5020.1	163.7	6208.18	5738.24	6747.65	257	4299.21	620.79	5621.63	803.79	3253.58	507.47	7664.37	6961.39	2790.34	25.74	0	0	0	0	0	0	0	0
82	13780	2554.95	2495.41	2614.48	30.37	2557.62	1349.8	195.7	424.58	75.56	1801.17	252.52	443.06	98.21	4927.16	694.01	6911.27	968.15	4710.68	4412.83	5056.71	163.88	6242.31	5773.05	6780.7	256.56	4336.82	621.13	5667.15	816.76	3283.64	517.68	7402.26	6976.04	2808.85	25.66	0	0	0	0	0	0	0	0
83	13948.1	2576.58	2516.67	2636.49	30.57	2588.95	1363.67	196.77	429.77	75.5	1815.77	253.39	450.74	97.16	4979.14	700.29	6938.6	966.4	4760.02	4461.23	5106.86	164.33	6262.67	5797.91	6795.37	253.97	4382.84	621.11	5720.35	821.07	3321.61	519.96	7247.02	6990.6	2827.21	25.58	0	0	0	0	0	0	0	0
84	14116.1	2598.08	2537.79	2658.37	30.76	2615.5	1375.22	196.2	434.76	75.89	1828.52	252.92	457.5	97.3	5018.92	699.89	6973.14	963.72	4798.21	4499.09	5145.2	164.45	6286.85	5824.57	6816.33	252.52	4422.25	621.47	5766.01	820.92	3353.95	520.93	11478.8	7005.06	2845.44	25.49	0	0	0	0	0	0	0	0
85	14284.2	2619.45	2558.79	2680.11	30.95	2636.91	1384.67	193.27	438.1	74.88	1838.08	249.02	462.62	96.28	5053.77	690.35	6991.68	941.34	4832.91	4532.95	5180.67	164.87	6304.49	5844.4	6831.17	251.26	4453.37	622.05	5801.84	808.87	3379.77	513.93	10935.5	7019.44	2863.54	25.4	0	0	0	0	0	0	0	0
86	14452.2	2640.7	2579.67	2701.73	31.14	2654.38	1391.35	195.38	441.2	75.92	1845.6	251.42	467.03	97.4	5075.12	697.52	7009.2	937.52	4855.98	4556.02	5203.6	164.83	6316.45	5858.44	6840.53	250.07	4478.52	620.71	5830.4	818.28	3400.77	520.84	8872.18	7033.73	2881.51	25.31	0	0	0	0	0	0	0	0
87	14620.3	2661.82	2600.42	2723.22	31.33	2677.28	1400.7	196.5	444.85	77.35	1853.86	252.65	472.48	97.16	5108.14	701.07	7017.94	936.94	4890.37	4589.8	5238.53	165.13	6326.22	5871.65	6846.06	248.12	4509.83	618.76	5864.82	824.64	3427.7	525.35	8342.01	7047.94	2899.36	25.22	0	0	0	0	0	0	0	0
88	14788.3	2682.81	2621.05	2744.58	31.51	2709.53	1414.31	198.06	450.7	77.9	1868	253.37	480.53	97.97	5155.67	706.88	7044.97	927.58	4936.56	4635.62	5284.87	165.26	6350.54	5899.46	6865.99	246.11	4556.3	616.93	5917.64	828.73	3466.49	529.77	8294.66	7062.06	2917.07	25.12	0	0	0	0	0	0	0	0
89	14956.4	2703.68	2641.55	2765.81	31.7	2737.29	1425.57	194.92	455.77	75.46	1879.77	249.09	487.68	95.45	5193.79	697.03	7064.71	925.4	4974.21	4673.29	5322.22	165.19	6368.99	5921.39	6880.04	244.11	4595.94	616.39	5962.16	812.34	3499.8	516.71	8434.19	7076.1	2934.67	25.02	0	0	0	0	0	0	0	0
90	15124.4	2724.44	2661.94	2786.93	31.88	2757.4	1433.56	194.89	459.5	74.66	1888	248.48	493.39	95.59	5222.11	697.18	7078.45	916.13	5000.76	4699.92	5348.51	165.1	6377.97	5933.3	6885.43	242.46	4624.42	615.11	5993.46	810.61	3523.88	516.16	11880.3	7090.05	2952.14	24.92	0	0	0	0	0	0	0	0
91	15292.5	2745.07	2682.22	2807.92	32.07	2782.72	1444.24	191.08	463.68	73.13	1899.39	244.98	499.8	93.06	5258	685.5	7099.49	918.16	5038.62	4737.23	5386.78	165.35	6395.79	5954.27	6899.24	240.64	4661.24	615.67	6035.5	796.47	3554.46	504.95	13228.6	7103.92	2969.49	24.82	0	0	0	0	0	0	0	0
92	15460.5	2765.58	2702.37	2828.79	32.25	2802.76	1453.17	190.11	467.18	72.44	1910.1	244.63	504.39	90.99	5288.55	683.5	7129.73	922	5069.5	4767.61	5418.08	165.59	6419.38	5979.21	6921.01	239.84	4692.1	616.38	6072.67	793.8	3579.2	501.01	113082	7117.71	2986.73	24.71	0	0	0	0	0	0	0	0
93	15628.6	2785.98	2722.41	2849.54	32.43	2821.58	1461.71	194	470.4	74.37	1919.69	248.69	508.5	93.65	5317.33	696.8	7160.3	922.73	5099.54	4797.01	5448.72	165.9	6446.03	6006.07	6947.26	239.68	4720.63	615.87	6106.88	809.04	3602.26	512.53	18093.6	7131.42	3003.84	24.6	0	0	0	0	0	0	0	0
94	15796.6	2806.26	2742.34	2870.18	32.61	2849.58	1474.64	190.93	475.8	74.39	1935.39	243.71	514	94.56	5363.33	683.84	7212.56	885.06	5141.73	4838.61	5491.35	166.17	6494.25	6053.52	6996.07	240.03	4764.38	618.68	6160.94	796.38	3636.96	509.34	12420.1	7145.05	3020.85	24.49	0	0	0	0	0	0	0	0
95	15964.7	2826.43	2762.16	2890.7	32.79	2868.63	1483.52	178.25	478.98	70.95	1947.21	224.06	517.37	92.46	5396.2	636.7	7257.84	814.66	5173.25	4869.25	5523.69	166.61	6535.75	6093.25	7039.39	240.95	4795.34	623.82	6200.47	735.58	3660.93	478.15	12424.7	7158.6	3037.74	24.38	0	0	0	0	0	0	0	0
96	16132.7	2846.48	2781.86	2911.11	32.97	2883.41	1489.53	178.39	481.54	70.86	1953.18	224.4	520.81	92.62	5418.03	637.68	7270.41	816.09	5194.2	4890.03	5544.74	166.67	6549.18	6107.78	7051.44	240.32	4816.24	623.3	6224.14	736.71	3678.54	478.79	12875	7172.08	3054.52	24.26	0	0	0	0	0	0	0	0
97	16300.8	2866.43	2801.46	2931.4	33.15	2914.64	1503.16	175.23	486.73	72.08	1968.96	218.99	526.93	92.57	5467.15	625.5	7318.77	788.22	5242.91	4937.64	5594.5	167.22	6597.5	6155.92	7099.64	240.34	4863.3	624.87	6280.97	724.98	3716.62	476.04	14337.5	7185.48	3071.2	24.14	0	0	0	0	0	0	0	0
98	16468.8	2886.27	2820.95	2951.59	33.33	2943.42	1514.3	177.1	491.99	72.85	1981.26	220.81	533.9	92.85	5507.36	634.53	7343.57	790.05	5280.89	4975.61	5632.27	167.18	6622.84	6183.56	7122.07	239.01	4904.46	625.08	6327.68	733.27	3751.11	481.82	155902	7198.8	3087.76	24.02	0	0	0	0	0	0	0	0
99	16636.9	2905.99	2840.33	2971.66	33.5	2966.19	1524.19	167.82	495.52	69.09	1991.98	207.28	539.31	88.45	5543.88	599.74	7367.18	751.34	5317.22	5011.15	5669.3	167.56	6643.72	6206.55	7140.18	237.78	4938.05	625.78	6366.76	689.09	3778.73	454.5	7954.74	7212.05	3104.22	23.9	0	0	0	0	0	0	0	0
100	16804.9	2925.61	2859.6	2991.62	33.68	2993.92	1536.13	160.63	500.4	67.2	2005.62	197.17	545.21	87.96	5586.58	572.68	7409.43	740.31	5358.5	5051.83	5711.06	167.84	6683.83	6246.81	7179.85	237.63	4979.48	628.11	6416.08	656.87	3812.48	438.37	7904.74	7225.22	3120.58	23.77	0	0	0	0	0	0	0	0
101	16973	2945.13	2878.77	3011.48	33.85	3008.73	1542.49	162.06	503.1	68.05	2012.16	199.09	548.44	88.44	5610.26	578.53	7428.3	745.11	5380.21	5073.29	5732.95	167.95	6700.52	6264.21	7195.58	237.21	5000.97	627.8	6441.08	664.28	3830.28	443.22	7886.87	7238.32	3136.83	23.64	0	0	0	0	0	0	0	0
102	17141	2964.54	2897.84	3031.23	34.03	3034.43	1552.05	162.72	507.9	67.73	2021.25	200.02	554.82	87.26	5643.64	581.63	7428.83	738.33	5411.78	5105.19	5763.95	167.72	6713.85	6280.71	7205.04	235.42	5035.86	626.23	6478.93	667.57	3860.46	443.54	7877.93	7251.35	3152.98	23.51	0	0	0	0	0	0	0	0
103	17309.1	2983.85	2916.81	3050.88	34.2	3054.21	1560.33	157.51	512.03	64.91	2031.17	193.84	558.53	85.73	5674.5	563.25	7461.73	733.56	5437.56	5131.14	5789.36	167.59	6746.88	6313.29	7238.41	235.62	5065.66	625.96	6515.07	645.22	3884.55	429.2	7879.27	7264.31	3169.03	23.37	0	0	0	0	0	0	0	0
104	17477.1	3003.05	2935.68	3070.42	34.37	3063.73	1564.31	159.61	513.43	65.69	2035.39	196	559.85	86.57	5688.84	570.6	7476.98	734.74	5452.63	5145.87	5804.75	167.76	6763.16	6329.21	7255.03	235.8	5079.55	625.59	6532.04	654.55	3895.92	436.18	7882.9	7277.2	3184.98	23.23	0	0	0	0	0	0	0	0
105	17645.2	3022.15	2954.44	3089.87	34.55	3086.63	1573.87	156.9	517.47	64.66	2045.59	193.61	566.11	83.6	5721.22	562.03	7497.79	723.23	5485.67	5178.57	5838.02	167.9	6778.2	6346.88	7266.82	234.31	5112.74	626.3	6569.38	645.88	3923.58	428.58	7881.76	7290.01	3200.84	23.09	0	0	0	0	0	0	0	0
106	17813.2	3041.16	2973.11	3109.21	34.72	3099.23	1578.99	157.02	519.82	64.72	2051.04	193.96	568.72	83.03	5738.55	562.9	7514.28	725.79	5502.96	5195.78	5855.31	167.92	6792.47	6361.76	7280.28	233.95	5130.92	625.73	6590.59	646.89	3938.67	428.23	7879.77	7302.76	3216.6	22.95	0	0	0	0	0	0	0	0
107	17981.2	3060.06	2991.68	3128.45	34.89	3121.34	1588.29	155.73	523.09	64.97	2060.54	193.01	573.8	83.15	5772.7	557.86	7534.86	714.65	5538.25	5230.21	5891.44	168.36	6815.62	6386.04	7301.95	233.28	5162.62	626.38	6626.89	642.94	3965.15	425.77	7991.52	7315.44	3232.26	22.8	0	0	0	0	0	0	0	0
108	18149.3	3078.87	3010.16	3147.59	35.06	3137.74	1594.9	157.71	526.26	65.93	2067.78	195	577.11	83.66	5797.61	565.41	7553.98	709.64	5560.16	5252.1	5913.27	168.35	6836.09	6406.95	7321.8	233.02	5186.37	625.51	6654.73	651.56	3984.82	431.78	8140.85	7328.05	3247.83	22.65	0	0	0	0	0	0	0	0
109	18317.3	3097.58	3028.54	3166.63	35.23	3154.3	1601.32	161.15	529.06	67.74	2074.22	197.37	580.86	86.1	5821.01	578.51	7565.55	704.84	5583.45	5275.15	5936.74	168.45	6852.6	6424.23	7337.32	232.57	5209.49	624.74	6680.73	663.62	4004.44	443.01	8335.74	7340.6	3263.31	22.5	0	0	0	0	0	0	0	0
110	18485.4	3116.2	3046.82	3185.58	35.4	3169.8	1607.72	158.77	531.58	67.06	2081.12	193.69	583.89	85.37	5845.05	571.18	7586.34	701.69	5606.53	5297.9	5960.1	168.61	6873.42	6445.28	7357.74	232.41	5232	624.2	6707.27	651.66	4023.03	436.65	8586.6	7353.07	3278.7	22.34	0	0	0	0	0	0	0	0
111	18653.5	3134.72	3065.01	3204.44	35.57	3188.07	1615.16	159.49	534.33	67.89	2088.27	194.75	588.14	86	5873.86	573.02	7604.35	700.98	5635.01	5325.75	5989.19	168.93	6890.42	6463.41	7373.33	231.76	5257.53	623.45	6735.88	656.11	4044.69	440.05	8934.78	7365.49	3294	22.18	0	0	0	0	0	0	0	0
112	18821.5	3153.15	3083.11	3223.19	35.74	3214.34	1626.34	156.81	538.91	65.69	2100.61	190.41	594.61	85.03	5912.02	563.01	7634.47	675.11	5673.63	5363.94	6028.1	169.12	6919.76	6493.94	7401.09	231.06	5296.19	624.8	6780.56	643.17	4076.57	432.55	9385.64	7377.84	3309.21	22.02	0	0	0	0	0	0	0	0
113	18989.5	3171.49	3101.12	3241.86	35.9	3242.92	1638.28	155.89	543.72	65.84	2112.1	190.13	601.93	84.39	5953.27	557.97	7652.15	669.35	5716.5	5406.11	6071.58	169.45	6942.13	6518.67	7420.54	229.72	5336.33	623.7	6825.05	641.96	4110.6	431.19	9977.42	7390.12	3324.34	21.85	0	0	0	0	0	0	0	0
114	19157.6	3189.73	3119.04	3260.43	36.07	3272.2	1650.58	143.93	549.58	62.18	2127.26	170.77	607.56	84.18	5997.26	513.88	7700.69	587.51	5755.94	5445.47	6110.88	169.44	6994.53	6569.56	7474.46	230.49	5380.8	626.19	6879.12	583.53	4146.42	404.02	10742.9	7402.34	3339.38	21.68	0	0	0	0	0	0	0	0
115	19325.6	3207.89	3136.86	3278.91	36.24	3293.11	1659.2	140.58	553.95	59.37	2136.72	167.64	613.21	80.22	6026.78	503.8	7715.27	585.3	5782.26	5472.08	6136.72	169.24	7010	6587.2	7487.24	229.26	5411.25	625.86	6913.55	569.62	4171.74	391	11839.6	7414.5	3354.33	21.51	0	0	0	0	0	0	0	0
116	19493.7	3225.95	3154.6	3297.3	36.4	3300.26	1662.2	138.06	554.85	59.07	2139.45	164.92	614.67	79.14	6036.92	495.64	7719.53	574.44	5794.44	5483.86	6149.31	169.45	7017.56	6595.09	7494.37	229.07	5421.27	625.72	6925.01	560.41	4180.2	384.76	13315.1	7426.59	3369.2	21.33	0	0	0	0	0	0	0	0
117	19661.7	3243.93	3172.26	3315.61	36.57	3310.53	1666.88	138.44	555.89	59.08	2144.05	164.93	616.35	79.14	6053.57	498.24	7735.68	574.32	5814	5502.63	6169.71	169.87	7033.43	6610.8	7510.35	229.14	5436.25	625.23	6943.06	561.36	4192.5	385.85	15248.2	7438.63	3383.98	21.15	0	0	0	0	0	0	0	0
118	19829.8	3261.82	3189.82	3333.82	36.73	3327.75	1673.8	131.4	558.73	55.75	2149.81	159.53	620.82	72.94	6077.49	475.44	7740.49	584.42	5838.97	5527.31	6194.88	169.99	7040.22	6620.11	7514.06	227.71	5459.34	623.54	6967.63	538.99	4212.61	364.76	17592.9	7450.6	3398.69	20.97	0	0	0	0	0	0	0	0
119	19997.8	3279.62	3207.3	3351.95	36.9	3340.98	1678.29	131.27	561.1	55.79	2153.71	159.54	623.56	72.82	6095.93	475.89	7747.34	581.63	5854.91	5543.38	6210.6	169.91	7050.39	6631.18	7523.13	227.2	5476.59	622.18	6986.22	538.18	4227.81	363.48	25911.3	7462.52	3413.31	20.78	0	0	0	0	0	0	0	0
120	20165.9	3297.34	3224.7	3369.99	37.06	3360.55	1686.32	131.48	564.35	55.71	2161.67	159.84	628.53	72.7	6124.87	476.02	7760.78	577.7	5883.78	5571.84	6239.81	170.1	7067.38	6649.51	7538.47	226.44	5504.21	622.14	7016.99	540.29	4251.15	364.65	23275.6	7474.37	3427.85	20.59	0	0	0	0	0	0	0	0
121	20333.9	3314.97	3242.01	3387.94	37.23	3383.86	1695.6	129.27	568.51	54.8	2170.13	156.72	634.16	71.01	6158.78	467.58	7771.46	555.11	5916.06	5603.91	6272.2	170.18	7084.87	6668.86	7553.68	225.39	5536.06	619.78	7051.83	531.37	4278.56	358.79	21800.2	7486.17	3442.32	20.39	0	0	0	0	0	0	0	0
122	20502	3332.52	3259.23	3405.81	37.39	3405.26	1704.91	126.63	572.34	54.89	2182.21	153.16	638.14	71.17	6190.93	456.98	7806.37	539.36	5948.32	5635.65	6304.9	170.43	7124.21	6707.3	7593.87	225.84	5569.58	621.72	7093.53	521.43	4305.09	354.88	41029	7497.9	3456.7	20.2	0	0	0	0	0	0	0	0
123	20670	3349.99	3276.38	3423.6	37.56	3427.42	1714.12	124.86	576.1	54.01	2191.43	152.56	644.52	68.58	6224.55	449.28	7819.78	535.65	5981.08	5667.96	6338.04	170.64	7138.49	6723.83	7605.41	224.57	5601.03	620.83	7127.99	517.7	4331.67	348.97	23320.4	7509.58	3471.01	19.99	0	0	0	0	0	0	0	0
124	20838.1	3367.37	3293.44	3441.3	37.72	3441.15	1719.56	126.14	578.06	53.87	2197.05	154.08	647.5	67.99	6243	453.92	7828.05	535.19	6002.22	5688.69	6359.58	170.85	7153.41	6739.32	7619.6	224.24	5620.48	620.26	7150.22	523.59	4348.01	351.53	212545	7521.21	3485.25	19.78	0	0	0	0	0	0	0	0
125	21006.1	3384.68	3310.42	3458.93	37.88	3449.88	1722.54	126.89	579.69	54.15	2199.7	154.66	649.66	68.45	6254.64	456.62	7829.86	532.29	6012.54	5699.11	6369.73	170.78	7158.81	6745.46	7624.1	223.82	5631.98	619.72	7162.38	526.74	4358.12	354.39	27648.9	7532.77	3499.4	19.57	0	0	0	0	0	0	0	0
126	21174.2	3401.9	3327.33	3476.47	38.05	3476.54	1733.68	123.39	583.92	53.27	2211.06	148.76	654.99	68.42	6296.24	445.48	7857.92	505.85	6053.51	5739.3	6411.43	171.17	7193.35	6780.29	7658.16	223.63	5670.05	620.06	7206.58	511.53	4389.91	349.13	29014.3	7544.28	3513.49	19.35	0	0	0	0	0	0	0	0
127	21342.2	3419.04	3344.15	3493.93	38.21	3489.57	1738.42	123.23	586.02	53.59	2215.86	149.21	657.82	68.43	6312.59	444.82	7868.13	506.63	6071.43	5757.06	6429.48	171.24	7206.52	6794.03	7670.61	223.3	5687.98	619.23	7226.62	512.23	4405.22	348.84	20082.4	7555.74	3527.5	19.13	0	0	0	0	0	0	0	0
128	21510.3	3436.1	3360.89	3511.31	38.37	3500.97	1743.05	123.4	587.86	53.33	2219.98	149.64	660.46	68.02	6329.8	444.91	7868.93	502.54	6088.43	5773.79	6446.7	171.37	7216.07	6804.32	7679.24	222.88	5703.61	618.98	7243.88	512.67	4418.63	347.91	16967.8	7567.14	3541.43	18.91	0	0	0	0	0	0	0	0
129	21678.3	3453.09	3377.56	3528.61	38.53	3514.74	1747.88	123.6	590.29	53.17	2224.42	149.46	663.65	68.12	6347.95	445.86	7875.86	503.41	6105.74	5791.15	6463.88	171.32	7226.88	6816.03	7688.96	222.37	5721.92	617.82	7263.59	512.59	4434.63	348.25	15193	7578.48	3555.3	18.67	0	0	0	0	0	0	0	0
130	21846.4	3469.99	3394.15	3545.84	38.7	3520.41	1749.97	123.58	591.09	53.06	2225.93	149.44	664.77	67.91	6354.67	446.36	7876.7	500.36	6114.06	5799.33	6472.33	171.39	7231.16	6820.68	7692.8	222.17	5729.22	617.57	7271.43	512.44	4441.09	347.79	13933.1	7589.77	3569.09	18.44	0	0	0	0	0	0	0	0
131	22014.4	3486.82	3410.67	3562.98	38.86	3542.54	1758.53	121.49	595.55	52.18	2235.67	146.33	669.1	67.11	6386.12	440.1	7901.06	485.39	6141.92	5827.34	6499.88	171.28	7261.47	6851.08	7722.86	222.08	5761.14	617.3	7308.87	503.88	4467.56	342.91	26468.1	7601.01	3582.82	18.19	0	0	0	0	0	0	0	0
132	22182.5	3503.58	3427.1	3580.06	39.02	3559.44	1765.07	122.12	598.35	51.67	2242.68	146.91	672.44	65.54	6409.79	444.17	7919.92	486.03	6165.62	5850.83	6523.72	171.37	7282.04	6872.07	7742.83	221.82	5785.13	616.81	7336.63	507.92	4487.63	344.18	17341.4	7612.2	3596.47	17.95	0	0	0	0	0	0	0	0
133	22350.5	3520.26	3443.47	3597.05	39.18	3571.44	1769.53	121.01	600.38	51.34	2246.43	145.88	674.82	65.11	6426.36	441.2	7925.13	483.81	6181.9	5867	6540.06	171.41	7293.38	6883.95	7753.51	221.52	5800.98	616.23	7353.99	503.36	4501.48	340.51	14825.1	7623.33	3610.06	17.69	0	0	0	0	0	0	0	0
134	22518.6	3536.86	3459.76	3613.97	39.34	3590.86	1777.01	114.82	603.75	49.23	2254.81	139.11	678.36	61.46	6453.88	419.95	7943.39	459.73	6208.52	5893.43	6566.79	171.49	7320.1	6910.77	7779.97	221.43	5828.84	616.45	7386.79	481.04	4524.62	324.87	13499.7	7634.41	3623.58	17.43	0	0	0	0	0	0	0	0
135	22686.6	3553.39	3475.97	3630.82	39.5	3604.22	1781.85	115.14	606.24	49.39	2259.99	138.71	680.97	62.04	6471.41	420.29	7954.64	449.2	6225.24	5910.21	6583.38	171.44	7336.53	6927.38	7796.12	221.31	5847.47	616.15	7408.1	481.42	4540.38	326.2	18143.6	7645.44	3637.03	17.16	0	0	0	0	0	0	0	0
136	22854.7	3569.85	3492.11	3647.59	39.66	3621.13	1788.55	105.3	608.98	45.47	2267.1	124.33	684.65	58.28	6495.84	384.88	7977.61	398.45	6249.83	5934.46	6608.24	171.6	7356.86	6948.08	7815.93	221.09	5871.56	617.47	7435.74	436.38	4560.54	299.8	24958.2	7656.42	3650.41	16.89	0	0	0	0	0	0	0	0
137	23022.7	3586.24	3508.18	3664.29	39.82	3635.94	1794.14	99.33	611.37	43.72	2272.6	117.8	687.3	55.84	6516.19	363.58	7987.76	382.97	6270.74	5955.12	6629.35	171.71	7375.26	6966.68	7834.02	220.96	5891.95	616.93	7459.09	412.73	4577.88	283.83	17297.3	7667.35	3663.73	16.61	0	0	0	0	0	0	0	0
138	23190.8	3602.55	3524.18	3680.92	39.98	3644.74	1797.67	95	612.65	42.51	2276.11	112.17	689.16	54.86	6529.72	346.49	7997.26	363.72	6284.36	5968.45	6643.26	171.86	7385.84	6977.42	7844.37	220.86	5904.36	617.18	7473.26	393.77	4588.33	272.81	14988.7	7678.23	3676.98	16.32	0	0	0	0	0	0	0	0
139	23358.8	3618.79	3540.11	3697.48	40.15	3659.19	1803.32	93.29	615.27	42.26	2282.24	111.32	691.62	54.22	6550.51	339.77	8013.28	357.45	6304.06	5988.03	6663.03	171.91	7406.58	6998.07	7865.12	220.89	5925.01	616.97	7497.68	388.12	4605.51	267.99	14150.9	7689.06	3690.17	16.03	0	0	0	0	0	0	0	0
140	23526.9	3634.97	3555.97	3713.97	40.31	3669.06	1806.47	93.91	616.66	42.44	2285.03	112.01	693.13	54.13	6562.09	342.66	8019.27	360.97	6317.16	6001.02	6676.2	171.95	7417.41	7009.11	7875.68	220.76	5937.77	616.25	7511.84	390.98	4616.73	269.76	13589.8	7699.84	3703.3	15.72	0	0	0	0	0	0	0	0
141	23694.9	3651.07	3571.75	3730.38	40.47	3680.4	1810.36	93.41	618.75	42.43	2288.76	112.06	695.52	53.9	6576.41	340.1	8022.81	360.93	6330.93	6014.87	6689.82	171.9	7428.11	7020.31	7885.75	220.48	5952.93	615.79	7528.47	389.6	4629.91	267.81	13151.6	7710.57	3716.36	15.41	0	0	0	0	0	0	0	0
142	23863	3667.1	3587.47	3746.73	40.63	3689.69	1813.74	92.96	619.9	41.82	2291.91	111.73	697.24	53.58	6588.65	337.89	8029.38	366.33	6345.05	6028.7	6704.23	172.05	7438.65	7031.07	7896.01	220.35	5965.46	615.08	7542.54	386.71	4640.7	265.34	584716	7721.25	3729.36	15.08	0	0	0	0	0	0	0	0
143	24031	3683.06	3603.12	3763.01	40.79	3704.85	1819.51	93.01	622.76	41.24	2297.59	110.53	700.48	54.12	6610.06	339.52	8046.27	359.21	6364.6	6048.28	6723.67	172.01	7455.32	7048.17	7912.12	220.1	5986.37	614.64	7566.01	384.16	4658.51	265.68	24924.7	7731.89	3742.3	14.75	0	0	0	0	0	0	0	0
144	24199.1	3698.96	3618.7	3779.22	40.95	3721.1	1825.39	89.84	625.42	39.66	2303.97	106.76	703.99	51.54	6630.77	328.72	8062.66	345.79	6386.53	6070.06	6745.68	172.07	7472.92	7066.36	7928.95	219.75	6009.07	614.76	7591.68	371.31	4677.73	256.03	33239.3	7742.48	3755.18	14.41	0	0	0	0	0	0	0	0
145	24367.1	3714.79	3634.22	3795.36	41.11	3738.11	1831.07	88.6	628.6	38.52	2309.62	105.45	707.53	49.98	6652.07	324.86	8076.8	344.51	6406.41	6090.16	6765.22	171.93	7489.12	7083.32	7944.2	219.32	6031.8	614.03	7616.64	364.56	4697.46	249.25	21412.9	7753.02	3767.99	14.05	0	0	0	0	0	0	0	0
146	24535.2	3730.55	3649.66	3811.43	41.27	3759.01	1840.05	69.01	632.33	32.06	2319.56	79.07	712.05	43.07	6685.5	253.62	8104.98	259.83	6437.5	6120.8	6796.69	172.15	7517.91	7112.23	7972.69	219.22	6062.68	615.51	7653.02	279.63	4722.78	199.55	17935.7	7763.52	3780.75	13.68	0	0	0	0	0	0	0	0
147	24703.2	3746.24	3665.04	3827.44	41.43	3771.9	1845.31	68.39	634.73	31.79	2324.62	78.52	714.95	41.61	6705.73	250.47	8116.82	253.39	6455.53	6138.69	6814.81	172.21	7531.08	7125.95	7985.18	218.9	6080.71	614.96	7673.31	279.14	4738.04	198.9	16095.3	7773.97	3793.45	13.3	0	0	0	0	0	0	0	0
148	24871.3	3761.87	3680.36	3843.39	41.59	3791.75	1852.26	66.5	638.18	30.1	2331.92	75.33	718.75	40.82	6732.12	244.72	8131.11	240.46	6480.78	6163.95	6839.96	172.18	7554.53	7149.75	8008.12	218.69	6107.91	614.59	7704.11	267.55	4761.29	191.32	14932.2	7784.37	3806.09	12.91	0	0	0	0	0	0	0	0
149	25039.3	3777.47	3695.64	3859.3	41.75	3801.49	1855.49	66.31	639.16	30.11	2333.93	75.3	719.95	40.79	6745.89	243.6	8136.49	239.97	6495.73	6178.52	6855.27	172.37	7564.48	7159.9	8017.83	218.57	6119.76	613.63	7716.87	267.6	4772.06	191.18	14107.8	7794.73	3818.67	12.49	0	0	0	0	0	0	0	0
150	25207.4	3794.29	3712.12	3876.46	41.92	3813.82	1859.76	64.96	641.46	29.68	2338.81	73.12	722.49	40	6760.62	240.47	8151.69	227.55	6510.71	6193.6	6870.11	172.3	7579.17	7174.83	8032.18	218.42	6137.04	614.08	7736.59	261.56	4786.64	187.86	13472.4	7805.21	3831.19	12.06	0	0	0	0	0	0	0	0
151	25375.4	3808.48	3726.02	3890.94	42.07	3822.97	1862.25	64.19	643.08	29.29	2340.7	72.45	724.3	40.01	6771.15	237.2	8152.09	226.75	6520.22	6203.32	6879.34	172.18	7585.24	7181.49	8037.55	218.1	6148.17	613.16	7747.92	258.06	4796.85	185.47	28682	7815.49	3843.66	11.61	0	0	0	0	0	0	0	0
152	25543.5	3823.86	3741.09	3906.63	42.23	3833.22	1866.66	61.55	644.67	28.27	2345.13	69.34	726.68	37.82	6786.81	227.13	8162.34	212.11	6536.58	6219.31	6896.05	172.36	7596.79	7193.38	8048.65	217.9	6162.92	613.17	7764.83	248.27	4809.14	178.59	18635.5	7825.72	3856.07	11.14	0	0	0	0	0	0	0	0
153	25711.5	3839.17	3756.09	3922.26	42.39	3845.39	1871.16	57.64	646.61	26.67	2349.52	65.18	729.1	36.21	6803.98	210.85	8174.2	200.44	6553.55	6236.11	6913.16	172.44	7610.48	7207.37	8061.94	217.72	6179.55	612.51	7783.53	232.64	4823.38	168.38	15944.5	7835.92	3868.42	10.65	0	0	0	0	0	0	0	0
154	25879.6	3854.43	3771.02	3937.83	42.55	3853.27	1873.56	57.56	647.85	25.76	2351.28	65.24	730.92	35.86	6813.32	209.49	8177.73	205.26	6563.06	6245.65	6922.59	172.42	7614.56	7212.12	8065.24	217.35	6189.28	611.81	7793.31	230.75	4832.25	165.73	14614.2	7846.07	3880.72	10.12	0	0	0	0	0	0	0	0
155	26047.6	3869.62	3785.9	3953.34	42.71	3872.5	1881.08	48.57	651.38	22.07	2359.4	55.42	735.69	28.99	6840.66	178.81	8200.97	182.85	6589.18	6271.63	6948.77	172.47	7633.92	7232.4	8083.42	216.82	6216.68	612.19	7824.15	195.27	4855.25	138.7	13870.8	7856.17	3892.96	9.56	0	0	0	0	0	0	0	0
156	26215.7	3884.75	3800.72	3968.78	42.87	3885.91	1885.46	48.49	653.56	21.76	2363.37	54.82	737.97	28.77	6858.58	179.25	8216	180.48	6606.07	6288.51	6965.62	172.46	7648.43	7247.21	8097.56	216.65	6234.13	611.58	7843.39	194.1	4870.57	138.22	13510.6	7866.24	3905.15	8.96	0	0	0	0	0	0	0	0
157	26383.7	3899.82	3815.47	3984.17	43.04	3892.89	1887.55	47.59	654.5	21.6	2364.64	54.44	739.48	28.53	6866.4	175.47	8213.66	180.38	6615.14	6297.51	6974.74	172.49	7651.8	7251.16	8100.24	216.32	6242.47	611.02	7851.61	191.68	4878.33	136.08	13672.5	7876.26	3917.29	8.31	0	0	0	0	0	0	0	0
158	26551.8	3914.83	3830.17	3999.5	43.2	3900.3	1890.08	47.86	655.4	21.4	2366.44	54.69	740.92	28.24	6875.74	175.92	8218.4	180.87	6626.03	6308.2	6985.83	172.59	7657.6	7257.36	8105.57	216.1	6251.76	610.37	7861.37	193.13	4886.68	136.8	15984.8	7886.24	3929.37	7.6	0	0	0	0	0	0	0	0
159	26719.8	3929.78	3844.8	4014.76	43.36	3923.09	1898.62	39.22	659.65	16.37	2374.48	44.89	746.48	22.88	6908.24	142.04	8238.09	154.65	6655.56	6337.72	7015.26	172.57	7677.22	7278.24	8123.66	215.39	6282.64	610.16	7894.82	156.22	4913.37	109.73	11465.2	7896.18	3941.4	6.81	0	0	0	0	0	0	0	0
160	26887.8	3944.67	3859.38	4029.97	43.52	3939.99	1904.51	36.52	662.35	14.96	2379.99	43.5	749.43	20.07	6930.69	129.4	8251.9	154.37	6678.17	6360.17	7037.97	172.64	7696.38	7297.72	8142.37	215.2	6305.11	609.26	7919.94	148.51	4932.88	101.32	11179.6	7906.08	3953.38	5.91	0	0	0	0	0	0	0	0
161	27055.9	3959.51	3873.89	4045.12	43.68	3959.9	1912.74	24.16	665.77	10.94	2388.71	27.95	754.17	13.73	6960.56	87.15	8278.09	97.94	6707.56	6389.13	7067.74	172.85	7719.82	7321.65	8165.15	214.9	6333.77	609.27	7952.66	98.28	4956.76	69.54	10932.6	7915.93	3965.3	4.84	0	0	0	0	0	0	0	0
162	27224	3974.28	3888.35	4060.21	43.84	3978.57	1919.89	6.65	669.2	5.19	2396.13	7.53	758.08	4.18	6986.81	26.04	8299.57	30.7	6732.56	6414.01	7092.77	172.89	7742.09	7344.26	8186.93	214.69	6359.91	608.78	7982.39	34.57	4978.84	27.76	10727.5	7925.75	3977.18	3.43	0	0	0	0	0	0	0	0
163	27392	3989	3902.75	4075.25	44	3989	1923	0	671	0	2399	0	760	0	6998.89	0	8305.79	0.18	6744.44	6426.01	7104.47	172.81	7752.09	7354.62	8196.49	214.49	6373.28	607.81	7996.81	0	4990.7	0	10542.2	7935.53	3989	0	0	0	0	0	0	0	0	0

## Sheet: Graph Creation
Individuals (computed)	S(est)	Chao 1 Mean	Singletons Mean
168.05	48.78	132.88	35.34
336.1	96.69	217.59	56.04
504.15	143.76	336.32	87.6
672.2	190.03	405.66	106.5
840.25	235.52	501.39	132.39
1008.29	280.27	615.23	165.73
1176.34	324.31	736.9	199.52
1344.39	367.66	819.08	222.21
1512.44	410.35	894.18	243.28
1680.49	452.4	947.29	258.54
1848.54	493.84	1069.95	293.07
2016.59	534.67	1177.67	323.67
2184.64	574.93	1273.51	351.23
2352.69	614.64	1319.35	364.64
2520.74	653.81	1397.39	387.21
2688.79	692.46	1470.1	408.12
2856.83	730.6	1543.75	429.08
3024.88	768.26	1618.77	449.63
3192.93	805.44	1686.74	469.92
3360.98	842.16	1816.75	506.3
3529.03	878.44	1896.26	529.28
3697.08	914.29	1974.7	551.42
3865.13	949.71	2017.57	563.36
4033.18	984.73	2130.62	595.63
4201.23	1019.35	2215.61	619.82
4369.28	1053.58	2273.54	636.22
4537.33	1087.43	2344.04	656.46
4705.37	1120.92	2374.77	666.11
4873.42	1154.05	2418.58	677.42
5041.47	1186.84	2472.78	693.78
5209.52	1219.28	2510.15	704.96
5377.57	1251.4	2568.49	720.9
5545.62	1283.19	2680.06	752.6
5713.67	1314.66	2730.81	766.46
5881.72	1345.83	2787.18	784.07
6049.77	1376.69	2837.5	798.23
6217.82	1407.27	2866.91	807.21
6385.87	1437.55	2928.48	825.64
6553.91	1467.55	2981.53	841.31
6721.96	1497.28	3034.08	857.53
6890.01	1526.74	3065.54	867.25
7058.06	1555.93	3098.88	876.82
7226.11	1584.87	3150.94	891.18
7394.16	1613.55	3198.08	904.33
7562.21	1641.99	3272.55	926.29
7730.26	1670.18	3326.49	942.4
7898.31	1698.14	3349.88	949.15
8066.36	1725.86	3417.24	967.85
8234.4	1753.35	3452.56	978.39
8402.45	1780.62	3489.83	988.87
8570.5	1807.66	3562.76	1011.17
8738.55	1834.5	3614.6	1026.65
8906.6	1861.11	3652.29	1039.31
9074.65	1887.52	3696.86	1053.23
9242.7	1913.73	3736.2	1064.66
9410.75	1939.73	3781.33	1078.41
9578.8	1965.54	3801.65	1084.47
9746.85	1991.15	3846.76	1098.06
9914.9	2016.57	3905.95	1115.34
10082.9	2041.8	3920.43	1119.81
10251	2066.85	3966.69	1133.49
10419	2091.72	4011.42	1146.82
10587.1	2116.41	4039.72	1155.16
10755.1	2140.92	4065.73	1162.86
10923.2	2165.26	4133.21	1181.99
11091.2	2189.42	4178.08	1194.65
11259.3	2213.43	4205.33	1203.04
11427.3	2237.26	4234.39	1211.43
11595.4	2260.93	4253.45	1216.9
11763.4	2284.45	4294.51	1229.42
11931.5	2307.8	4338.13	1242
12099.5	2331	4370.01	1250.52
12267.6	2354.05	4398.44	1258.99
12435.6	2376.95	4432.37	1268.46
12603.7	2399.7	4454.14	1274.88
12771.7	2422.3	4480.82	1283.45
12939.8	2444.75	4528.91	1296.21
13107.8	2467.07	4560.39	1305.44
13275.9	2489.24	4574.22	1309.27
13443.9	2511.28	4629.89	1325.11
13612	2533.18	4674.34	1338.78
13780	2554.95	4710.68	1349.8
13948.1	2576.58	4760.02	1363.67
14116.1	2598.08	4798.21	1375.22
14284.2	2619.45	4832.91	1384.67
14452.2	2640.7	4855.98	1391.35
14620.3	2661.82	4890.37	1400.7
14788.3	2682.81	4936.56	1414.31
14956.4	2703.68	4974.21	1425.57
15124.4	2724.44	5000.76	1433.56
15292.5	2745.07	5038.62	1444.24
15460.5	2765.58	5069.5	1453.17
15628.6	2785.98	5099.54	1461.71
15796.6	2806.26	5141.73	1474.64
15964.7	2826.43	5173.25	1483.52
16132.7	2846.48	5194.2	1489.53
16300.8	2866.43	5242.91	1503.16
16468.8	2886.27	5280.89	1514.3
16636.9	2905.99	5317.22	1524.19
16804.9	2925.61	5358.5	1536.13
16973	2945.13	5380.21	1542.49
17141	2964.54	5411.78	1552.05
17309.1	2983.85	5437.56	1560.33
17477.1	3003.05	5452.63	1564.31
17645.2	3022.15	5485.67	1573.87
17813.2	3041.16	5502.96	1578.99
17981.2	3060.06	5538.25	1588.29
18149.3	3078.87	5560.16	1594.9
18317.3	3097.58	5583.45	1601.32
18485.4	3116.2	5606.53	1607.72
18653.5	3134.72	5635.01	1615.16
18821.5	3153.15	5673.63	1626.34
18989.5	3171.49	5716.5	1638.28
19157.6	3189.73	5755.94	1650.58
19325.6	3207.89	5782.26	1659.2
19493.7	3225.95	5794.44	1662.2
19661.7	3243.93	5814	1666.88
19829.8	3261.82	5838.97	1673.8
19997.8	3279.62	5854.91	1678.29
20165.9	3297.34	5883.78	1686.32
20333.9	3314.97	5916.06	1695.6
20502	3332.52	5948.32	1704.91
20670	3349.99	5981.08	1714.12
20838.1	3367.37	6002.22	1719.56
21006.1	3384.68	6012.54	1722.54
21174.2	3401.9	6053.51	1733.68
21342.2	3419.04	6071.43	1738.42
21510.3	3436.1	6088.43	1743.05
21678.3	3453.09	6105.74	1747.88
21846.4	3469.99	6114.06	1749.97
22014.4	3486.82	6141.92	1758.53
22182.5	3503.58	6165.62	1765.07
22350.5	3520.26	6181.9	1769.53
22518.6	3536.86	6208.52	1777.01
22686.6	3553.39	6225.24	1781.85
22854.7	3569.85	6249.83	1788.55
23022.7	3586.24	6270.74	1794.14
23190.8	3602.55	6284.36	1797.67
23358.8	3618.79	6304.06	1803.32
23526.9	3634.97	6317.16	1806.47
23694.9	3651.07	6330.93	1810.36
23863	3667.1	6345.05	1813.74
24031	3683.06	6364.6	1819.51
24199.1	3698.96	6386.53	1825.39
24367.1	3714.79	6406.41	1831.07
24535.2	3730.55	6437.5	1840.05
24703.2	3746.24	6455.53	1845.31
24871.3	3761.87	6480.78	1852.26
25039.3	3777.47	6495.73	1855.49
25207.4	3794.29	6510.71	1859.76
25375.4	3808.48	6520.22	1862.25
25543.5	3823.86	6536.58	1866.66
25711.5	3839.17	6553.55	1871.16
25879.6	3854.43	6563.06	1873.56
26047.6	3869.62	6589.18	1881.08
26215.7	3884.75	6606.07	1885.46
26383.7	3899.82	6615.14	1887.55
26551.8	3914.83	6626.03	1890.08
26719.8	3929.78	6655.56	1898.62
26887.8	3944.67	6678.17	1904.51
27055.9	3959.51	6707.56	1912.74
27224	3974.28	6732.56	1919.89
27392	3989	6744.44	1923
